# Supplementary material for: PGFinder, a novel analysis pipeline for the consistent, reproducible, and high-resolution structural analysis of bacterial peptidoglycans
Source: eLife. 2021 Sep 28;10:e70597. doi: 10.7554/eLife.70597 (PMC8478412; doi:10.7554/eLife.70597)
Supplement: Figure 4—source data 1. [file elife-70597-fig4-data1.csv]

Structure	Monoisotopicmass
Lac-AEJ|1	462.1962094
Lac-AEJA |1	533.2333094
Lac-AEJG |1	519.2176094
Lac-AEJK |1	590.2959094
Lac-AEJ[L/I] |1	575.2849094
Lac-AEJS |1	549.2329094
Lac-AEJV |1	561.2689094
Lac-AEJF |1	609.2689094
Lac-AEJM |1	593.2409094
Lac-AEJH |1	599.2599094
Lac-AEJR |1	618.3009094
Lac-AEJY |1	625.2609094
Lac-AEJAA|1	604.2704094
Lac-AEJ[AG]|1	590.2547694
Lac-AEJ[AV]|1	632.3059694
Lac-AEJ-JEA|2	834.3601694
Lac-AEJ[GG]|1	576.2390694
Lac-AEJ-Lac-AEJ |2	906.3818388
Lac-AEJG-Lac-AEJ |2	963.4032388
Lac-AEJK-Lac-AEJ |2	1034.481539
Lac-AEJ[L/I]-Lac-AEJ |2	1019.470539
Lac-AEJS-Lac-AEJ |2	993.4185388
Lac-AEJV-Lac-AEJ |2	1005.454539
Lac-AEJF-Lac-AEJ |2	1053.454539
Lac-AEJM-Lac-AEJ |2	1037.426539
Lac-AEJH-Lac-AEJ |2	1043.445539
Lac-AEJR-Lac-AEJ |2	1062.486539
Lac-AEJY-Lac-AEJ |2	1069.446539
Lac-AEJ[GG]-Lac-AEJ |2	1020.424739
Lac-AEJ-Lac-AEJA |2	977.4189388
Lac-AEJA-Lac-AEJA |2	1048.456039
Lac-AEJG-Lac-AEJA |2	1034.440339
Lac-AEJK-Lac-AEJA |2	1105.518639
Lac-AEJ[L/I]-Lac-AEJA |2	1090.507639
Lac-AEJS-Lac-AEJA |2	1064.455639
Lac-AEJV-Lac-AEJA |2	1076.491639
Lac-AEJF-Lac-AEJA |2	1124.491639
Lac-AEJM-Lac-AEJA |2	1108.463639
Lac-AEJH-Lac-AEJA |2	1114.482639
Lac-AEJR-Lac-AEJA |2	1133.523639
Lac-AEJY-Lac-AEJA |2	1140.483639
Lac-AEJAA-Lac-AEJA |2	1119.493139
Lac-AEJ[GG]-Lac-AEJA |2	1091.461839
(Lac-AEJA)3 |3	1563.678784
(Lac-AEJG)3 |3	1521.631699
(Lac-AEJ)3 |3	1350.567499
(Lac-AEJG)2-LacAEJ |3	1464.610299
(Lac-AEJG)2-LacAEJA |3	1535.647399
(Lac-AEJA)2-LacAEJ |3	1492.641684
(Lac-AEJ)2-Lac-AEJA |3	1421.604584
(Lac-AEJ)2-Lac-AEJG |3	1407.588899
(Lac-AEJA)2-LacAEJG |3	1549.663084
Lac-AEJA-LacAEJG-LacAEJ |3	1478.625999
(Lac-AEJA)4 |4	2078.901513
(Lac-AEJ)4 |4	1794.753144
(Lac-AEJG)4 |4	2022.838744
(Lac-AEJA)3-Lac-AEJ |4	2007.864428
(Lac-AEJA)3-Lac-AEJG |4	2064.885828
(Lac-AEJ)3-Lac-AEJG |4	1851.774544
(Lac-AEJA)2-Lac-AEJ-Lac-AEJG |4	1993.848744
(Lac-AEJA)2-(Lac-AEJ)2 |4	1936.827344
(Lac-AEJA)2-(Lac-AEJG)2 |4	2050.870144
Lac-AEJA-(Lac-AEJ)3 |4	1865.790244
Lac-AEJA-(Lac-AEJ)2-Lac-AEJG |4	1922.811644
Lac-AEJA-Lac-AEJ-(Lac-AEJG)2 |4	1979.833044
Lac-AEJA-(Lac-AEJG)3 |4	2036.854444
(Lac-AEJA)2-(Lac-AEJG)2 |4	2050.870144
Lac-AEJ-(Lac-AEJG)3 |4	1965.817344
(Lac-AEJA)5 |5	2594.124258
(Lac-AEJA)4-Lac-AEJ |5	2523.087158
(Lac-AEJA)4-Lac-AEJG |5	2580.108558
(Lac-AEJA)3-(Lac-AEJ)2 |5	2452.050073
(Lac-AEJA)2-(Lac-AEJ)3 |5	2381.012988
Lac-AEJA-(Lac-AEJ)4 |5	2309.975888
