# Supplementary material for: PGFinder, a novel analysis pipeline for the consistent, reproducible, and high-resolution structural analysis of bacterial peptidoglycans
Source: eLife. 2021 Sep 28;10:e70597. doi: 10.7554/eLife.70597 (PMC8478412; doi:10.7554/eLife.70597)
Supplement: Figure 4—source data 2. [file elife-70597-fig4-data2.xlsx]

## Sheet: R20291.1
ID	xicStart	xicEnd	feature	corrMax	ionCount	chargeOrder	maxIsotopeCount	rt	mwMonoisotopic	theo_mwMonoisotopic	inferredStructure	maxIntensity		Structure	Intensity	RT	Abundance	Oligomerisation state
2	0.546983	1.57491	2	0.999212	157	2	3	0.957088	1421.61	1421.6	(Lac-AEJ)2-Lac-AEJA |3	640710		Lac-AEJA |1	4047234495	6.61406	0.414855	1
7831	30.5803	31.115	7831	0.974302	50	2	3	30.8598	1421.6	1421.6	(Lac-AEJ)2-Lac-AEJA |3	266018		Lac-AEJF |1	333256942	20.7142	0.0341599	1
7812	30.4833	30.5287	7812	0.920034	5	2	3	30.5087	1421.61	1421.6	(Lac-AEJ)2-Lac-AEJA |3	126737		Lac-AEJG |1	278231035	4.05147	0.0285196	1
7595	29.5067	30.0708	7595	0.941193	59	2	3	29.7839	1421.61	1421.6	(Lac-AEJ)2-Lac-AEJA |3	132512		Lac-AEJ[L/I] |1	162171136	18.147	0.0166231	1
7238	27.8632	29.3944	7238	0.938952	150	2	3	28.6133	1421.6	1421.6	(Lac-AEJ)2-Lac-AEJA |3	201545		Lac-AEJV |1	143357599	13.5527	0.0146946	1
7105	27.0401	27.5544	7105	0.99161	49	2	3	27.2604	1421.61	1421.6	(Lac-AEJ)2-Lac-AEJA |3	158504		Lac-AEJY |1	114100704	15.4687	0.0116957	1
6973	26.5048	26.9707	6973	0.931112	54	2	3	26.74	1421.6	1421.6	(Lac-AEJ)2-Lac-AEJA |3	171557		Lac-AEJ|1	88233405	3.41016	0.00904422	1
6767	25.6577	26.4353	6767	0.982697	90	2	3	26.0166	1421.6	1421.6	(Lac-AEJ)2-Lac-AEJA |3	169121		Lac-AEJR |1	24971199	3.98781	0.00255963	1
6592	24.9159	25.4941	6592	0.99152	66	2	3	25.2089	1421.61	1421.6	(Lac-AEJ)2-Lac-AEJA |3	189871		Lac-AEJAA|1	13726316	9.23912	0.00140699	1
6376	23.7822	24.6502	6376	0.96173	86	2	3	24.2217	1421.61	1421.6	(Lac-AEJ)2-Lac-AEJA |3	425180		Lac-AEJH |1	10179066	3.59055	0.00104339	1
5614	20.4306	23.7216	5614	0.999042	349	2;3	3	21.8334	1421.61	1421.6	(Lac-AEJ)2-Lac-AEJA |3	669325		Lac-AEJS |1	8100648	3.50277	0.000830343	1
5540	20.2603	20.3513	5540	0.991241	6	2	3	20.3055	1421.6	1421.6	(Lac-AEJ)2-Lac-AEJA |3	331873		Lac-AEJK |1	6928963	2.99965	0.000710242	1
5001	18.2631	19.9271	5001	0.999016	214	1;2	3	18.533	1421.61	1421.6	(Lac-AEJ)2-Lac-AEJA |3	460661824		Lac-AEJ[GG]|1	4545131	3.25583	0.000465891	1
4958	18.0897	18.1155	4958	0.932041	3	2	3	18.0998	1421.61	1421.6	(Lac-AEJ)2-Lac-AEJA |3	432536		Lac-AEJ[AG]|1	3523122	8.73454	0.000361132	1
4924	17.89	18.046	4924	0.999276	22	1;2	3	17.9521	1421.61	1421.6	(Lac-AEJ)2-Lac-AEJA |3	12127994		Lac-AEJ[AV]|1	638571	15.3582	6.54556e-05	1
8019	31.1922	31.7137	8019	0.943324	48	2	3	31.4165	1421.6	1421.6	(Lac-AEJ)2-Lac-AEJA |3	148634		Lac-AEJ-Lac-AEJA |2	1460119990	14.67	0.149667	2
291	1.94322	2.04649	291	0.985734	7	2	3	1.98343	1421.6	1421.6	(Lac-AEJ)2-Lac-AEJA |3	146441		Lac-AEJA-Lac-AEJA |2	836779629	15.5269	0.0857727	2
6678	25.2117	25.2526	6678	0.987692	4	2	3	25.2313	1407.59	1407.59	(Lac-AEJ)2-Lac-AEJG |3	54059		Lac-AEJG-Lac-AEJ |2	306387320	12.8004	0.0314057	2
6300	23.3827	23.5695	6300	0.985498	17	2	3	23.4866	1407.58	1407.59	(Lac-AEJ)2-Lac-AEJG |3	206244		Lac-AEJF-Lac-AEJ |2	146779139	25.645	0.0150453	2
6361	23.6397	23.7303	6361	0.944933	7	2	3	23.6894	1407.58	1407.59	(Lac-AEJ)2-Lac-AEJG |3	203371		Lac-AEJ-JEA|2	133060173	14.3915	0.0136391	2
5917	21.6897	22.0939	5917	0.98344	41	2	3	21.8712	1407.58	1407.59	(Lac-AEJ)2-Lac-AEJG |3	592503		Lac-AEJ-Lac-AEJ |2	105568368	13.0325	0.0108211	2
6525	24.3755	24.419	6525	0.975383	4	2	3	24.3916	1407.58	1407.59	(Lac-AEJ)2-Lac-AEJG |3	138225		Lac-AEJG-Lac-AEJA |2	86974973	13.8013	0.00891522	2
37	0.558227	0.583314	37	0.990773	4	2	3	0.572025	1407.59	1407.59	(Lac-AEJ)2-Lac-AEJG |3	85361		Lac-AEJ[L/I]-Lac-AEJ |2	81798168	23.8335	0.00838458	2
6070	22.3579	22.5537	6070	0.991442	23	2	3	22.4536	1407.58	1407.59	(Lac-AEJ)2-Lac-AEJG |3	381291		Lac-AEJF-Lac-AEJA |2	35824657	26.4632	0.00367215	2
4490	16.6883	17.8727	4490	0.999349	144	2;1	3	16.8597	1407.59	1407.59	(Lac-AEJ)2-Lac-AEJG |3	89474008		Lac-AEJY-Lac-AEJ |2	34974493	20.357	0.003585	2
4623	17.0341	17.4081	4623	0.997562	56	2;1	3	17.1511	1350.57	1350.57	(Lac-AEJ)3 |3	25520582		Lac-AEJV-Lac-AEJ |2	32613343	19.9239	0.00334298	2
4777	17.463	17.7395	4777	0.981619	23	2	3	17.6187	1350.57	1350.57	(Lac-AEJ)3 |3	1447310		Lac-AEJR-Lac-AEJ |2	27060051	12.2813	0.00277374	2
6506	24.287	24.4826	6506	0.979354	22	2	3	24.3689	1851.77	1851.77	(Lac-AEJ)3-Lac-AEJG |4	433058		Lac-AEJK-Lac-AEJ |2	26970528	11.3271	0.00276457	2
5467	19.9876	20.0662	5467	0.858332	10	2	3	20.0225	1851.77	1851.77	(Lac-AEJ)3-Lac-AEJG |4	301018		Lac-AEJ[L/I]-Lac-AEJA |2	26018508	24.8354	0.00266698	2
6843	25.8832	26.0605	6843	0.78065	20	2	4	25.9625	1851.77	1851.77	(Lac-AEJ)3-Lac-AEJG |4	72042		Lac-AEJS-Lac-AEJ |2	16056330	12.2695	0.00164583	2
6981	26.496	26.6662	6981	0.969503	18	2	3	26.5718	1851.77	1851.77	(Lac-AEJ)3-Lac-AEJG |4	121227		Lac-AEJH-Lac-AEJ |2	13565407	11.6541	0.0013905	2
6676	25.2188	25.2959	6676	0.993195	6	2	3	25.2547	1851.78	1851.77	(Lac-AEJ)3-Lac-AEJG |4	57208		Lac-AEJK-Lac-AEJA |2	9149830	12.3596	0.000937888	2
5362	19.5675	19.8848	5362	0.987501	58	2;3	3	19.7553	1851.78	1851.77	(Lac-AEJ)3-Lac-AEJG |4	3292026		Lac-AEJY-Lac-AEJA |2	8703602	21.1993	0.000892148	2
5454	19.9444	20.1635	5454	0.974844	22	2	3	20.0412	1794.75	1794.75	(Lac-AEJ)4 |4	1401281		Lac-AEJ[GG]-Lac-AEJ |2	8090479	11.8233	0.000829301	2
5565	20.2801	20.3156	5565	0.957974	3	2	3	20.3041	1794.76	1794.75	(Lac-AEJ)4 |4	168596		Lac-AEJR-Lac-AEJA |2	7488073	13.2602	0.000767552	2
5874	21.5929	23.1503	5874	0.992106	249	2;3	3	21.8625	1936.83	1936.83	(Lac-AEJA)2-(Lac-AEJ)2 |4	23285146		Lac-AEJV-Lac-AEJA |2	5657325	20.9979	0.000579894	2
6363	23.6486	23.6755	6363	0.998792	3	2	3	23.6647	1936.84	1936.83	(Lac-AEJA)2-(Lac-AEJ)2 |4	64144		Lac-AEJS-Lac-AEJA |2	4655581	13.3522	0.000477212	2
5815	21.2719	21.3589	5815	0.914984	18	2;3	3	21.3093	1936.83	1936.83	(Lac-AEJA)2-(Lac-AEJ)2 |4	482490		Lac-AEJAA-Lac-AEJA |2	3570967	16.3462	0.000366036	2
6320	23.4616	24.1343	6320	0.986574	126	3;2	4	23.7272	2381.01	2381.01	(Lac-AEJA)2-(Lac-AEJ)3 |5	1774921		Lac-AEJH-Lac-AEJA |2	3083174	12.524	0.000316036	2
6444	24.0878	24.1609	6444	0.948614	6	2	4	24.1246	2050.86	2050.87	(Lac-AEJA)2-(Lac-AEJG)2 |4	73659		Lac-AEJ[GG]-Lac-AEJA |2	2312199	12.8288	0.000237008	2
5810	21.2612	21.4547	5810	0.863798	32	2;3	3	21.3403	1993.85	1993.85	(Lac-AEJA)2-Lac-AEJ-Lac-AEJG |4	331516		Lac-AEJM-Lac-AEJA |2	207542	23.488	2.12737e-05	2
5718	20.8958	21.1567	5718	0.986695	55	2;3	3	21.0282	1993.85	1993.85	(Lac-AEJA)2-Lac-AEJ-Lac-AEJG |4	872413		(Lac-AEJ)2-Lac-AEJA |3	477000382	18.533	0.0488941	3
6605	24.8987	25.4941	6605	0.92164	64	2	3	25.1913	1492.64	1492.64	(Lac-AEJA)2-LacAEJ |3	144242		(Lac-AEJA)2-LacAEJ |3	312597796	19.3839	0.0320423	3
6390	23.8859	24.5526	6390	0.9401	72	2	3	24.224	1492.65	1492.64	(Lac-AEJA)2-LacAEJ |3	179782		(Lac-AEJ)2-Lac-AEJG |3	91135062	16.8597	0.00934164	3
5869	21.4982	22.954	5869	0.945595	151	2	3	22.1582	1492.64	1492.64	(Lac-AEJA)2-LacAEJ |3	552742		(Lac-AEJA)3 |3	63698387	20.1497	0.00652929	3
6798	25.6753	26.3808	6798	0.979664	77	2	3	25.997	1492.64	1492.64	(Lac-AEJA)2-LacAEJ |3	127810		Lac-AEJA-LacAEJG-LacAEJ |3	35087502	17.7304	0.00359658	3
5828	21.3153	21.4027	5828	0.924326	8	2	3	21.3598	1492.64	1492.64	(Lac-AEJA)2-LacAEJ |3	474635		(Lac-AEJ)3 |3	26967892	17.1511	0.0027643	3
6985	26.533	26.9358	6985	0.926454	40	2	3	26.7208	1492.64	1492.64	(Lac-AEJA)2-LacAEJ |3	126177		(Lac-AEJA)2-LacAEJG |3	9358073	18.4507	0.000959233	3
28	0.546983	1.56904	28	0.999043	152	2	3	0.949205	1492.64	1492.64	(Lac-AEJA)2-LacAEJ |3	392909		(Lac-AEJG)2-LacAEJ |3	1392259	16.0611	0.000142711	3
7119	27.0925	27.4052	7119	0.945749	33	2	3	27.2343	1492.64	1492.64	(Lac-AEJA)2-LacAEJ |3	81445		(Lac-AEJA)2-(Lac-AEJ)2 |4	23831780	21.8625	0.00244284	4
5211	19.0276	20.763	5211	0.997808	231	2;1	3	19.3839	1492.64	1492.64	(Lac-AEJA)2-LacAEJ |3	307476960		Lac-AEJA-(Lac-AEJ)3 |4	22801869	21.1784	0.00233727	4
7254	27.9519	28.2077	7254	0.931881	19	2	3	28.0712	1492.65	1492.64	(Lac-AEJA)2-LacAEJ |3	96904		(Lac-AEJA)3-Lac-AEJ |4	8769031	22.5131	0.000898855	4
7854	30.6432	30.7301	7854	0.957282	6	2	3	30.6969	1492.64	1492.64	(Lac-AEJA)2-LacAEJ |3	72936		(Lac-AEJ)3-Lac-AEJG |4	4276579	19.7553	0.000438363	4
7341	28.3601	28.7406	7341	0.933623	39	2	3	28.566	1492.64	1492.64	(Lac-AEJA)2-LacAEJ |3	87005		Lac-AEJA-(Lac-AEJ)2-Lac-AEJG |4	3829738	20.3969	0.000392561	4
6249	23.1064	23.6952	6249	0.956143	60	2	3	23.3943	1492.64	1492.64	(Lac-AEJA)2-LacAEJ |3	211124		(Lac-AEJA)4 |4	3017545	22.9512	0.000309308	4
5099	18.6269	18.7599	5099	0.99439	16	2	3	18.7056	1492.64	1492.64	(Lac-AEJA)2-LacAEJ |3	2352029		(Lac-AEJ)4 |4	1569877	20.0412	0.000160918	4
7445	28.7947	29.3253	7445	0.977376	45	2	3	29.0511	1492.64	1492.64	(Lac-AEJA)2-LacAEJ |3	79086		(Lac-AEJA)2-Lac-AEJ-Lac-AEJG |4	1203929	21.0282	0.000123407	4
7922	30.8305	31.06	7922	0.90322	13	2	3	30.9465	1492.65	1492.64	(Lac-AEJA)2-LacAEJ |3	62944		(Lac-AEJA)3-Lac-AEJG |4	339055	21.6331	3.47543e-05	4
7625	29.5608	30.0621	7625	0.949019	34	2	3	29.7993	1492.64	1492.64	(Lac-AEJA)2-LacAEJ |3	79066		(Lac-AEJA)2-(Lac-AEJG)2 |4	73659	24.1246	7.55029e-06	4
5034	18.3607	18.5156	5034	0.988818	19	2	3	18.4507	1549.66	1549.66	(Lac-AEJA)2-LacAEJG |3	7378143		(Lac-AEJA)2-(Lac-AEJ)3 |5	1774921	23.7272	0.000181935	5
5121	18.653	18.86	5121	0.984368	20	2	3	18.7741	1549.67	1549.66	(Lac-AEJA)2-LacAEJG |3	1321765		(Lac-AEJA)4-Lac-AEJ |5	1681613	24.6349	0.000172371	5
5189	18.9121	19.0538	5189	0.97284	16	2	3	18.9717	1549.66	1549.66	(Lac-AEJA)2-LacAEJG |3	658165		(Lac-AEJA)3-(Lac-AEJ)2 |5	1201860	24.2688	0.000123195	5
5673	20.7717	21.1567	5673	0.990607	40	2	3	20.8818	1563.68	1563.68	(Lac-AEJA)3 |3	2451172		Lac-AEJA-(Lac-AEJ)4 |5	1154522	23.1216	0.000118342	5
5422	19.7977	20.6681	5422	0.997845	116	2;1;3	3	20.1497	1563.68	1563.68	(Lac-AEJA)3 |3	61154196		(Lac-AEJA)5 |5	352117	25.0852	3.60932e-05	5
26	0.558227	0.627666	26	0.990248	6	2	3	0.578198	1563.68	1563.68	(Lac-AEJA)3 |3	93019
6419	23.9887	24.6067	6419	0.977564	124	3;2	5	24.2688	2452.05	2452.05	(Lac-AEJA)3-(Lac-AEJ)2 |5	1201860		Sum intensity	9755783629
6042	22.2305	23.3665	6042	0.977771	209	2;3	3	22.5131	2007.87	2007.86	(Lac-AEJA)3-Lac-AEJ |4	8664676
5950	21.8497	21.9021	5950	0.996641	7	3;2	3	21.8775	2007.87	2007.86	(Lac-AEJA)3-Lac-AEJ |4	104355
5877	21.61	21.6703	5877	0.948253	7	2	3	21.6331	2064.89	2064.89	(Lac-AEJA)3-Lac-AEJG |4	339055
6191	22.8481	23.0688	6191	0.983795	51	2;3	3	22.9512	2078.9	2078.9	(Lac-AEJA)4 |4	1881184
6261	23.1768	23.4152	6261	0.981377	53	2;3	4	23.2791	2078.91	2078.9	(Lac-AEJA)4 |4	958491
6332	23.5517	23.6576	6332	0.928582	26	3;2	4	23.5984	2078.9	2078.9	(Lac-AEJA)4 |4	177870
6587	24.8647	25.0506	6587	0.913952	28	3;2	3	24.9265	2523.08	2523.09	(Lac-AEJA)4-Lac-AEJ |5	475258
6654	25.1074	25.2363	6654	0.910428	12	3	5	25.1775	2523.09	2523.09	(Lac-AEJA)4-Lac-AEJ |5	97241
6563	24.5263	24.7019	6563	0.900102	31	3;2	4	24.6349	2523.09	2523.09	(Lac-AEJA)4-Lac-AEJ |5	1109114
6693	25.2707	25.3921	6693	0.987586	13	3;2	4	25.3345	2594.13	2594.12	(Lac-AEJA)5 |5	102484
6626	25.0244	25.1585	6626	0.985255	27	3;2	5	25.0852	2594.13	2594.12	(Lac-AEJA)5 |5	249633
4270	15.9647	16.1686	4270	0.971466	24	2	3	16.0611	1464.61	1464.61	(Lac-AEJG)2-LacAEJ |3	1392259
4011	15.0738	15.4079	4011	0.996436	58	2;1	3	15.1861	834.36	834.36	Lac-AEJ-JEA|2	32900220
3785	14.2782	14.8194	3785	0.996982	87	2;1	3	14.3915	834.36	834.36	Lac-AEJ-JEA|2	49986048
2501	10.3641	10.6194	2501	0.999863	44	2;1	3	10.4988	834.361	834.36	Lac-AEJ-JEA|2	11333876
2133	9.24907	9.95407	2133	0.999651	112	2;1	3	9.44755	834.361	834.36	Lac-AEJ-JEA|2	20855910
3701	13.997	14.1031	3701	0.999661	12	2	3	14.0578	834.361	834.36	Lac-AEJ-JEA|2	906246
2049	8.97042	9.17963	2049	0.999652	33	1;2	3	9.07302	834.361	834.36	Lac-AEJ-JEA|2	3880265
1983	8.78512	8.81998	1983	0.99945	5	2	3	8.80108	834.361	834.36	Lac-AEJ-JEA|2	542617
1934	8.62353	8.67612	1934	0.989853	5	2	3	8.65683	834.361	834.36	Lac-AEJ-JEA|2	238378
1706	7.96614	8.28567	1706	0.998691	63	1;2	3	8.12313	834.361	834.36	Lac-AEJ-JEA|2	12093357
1648	7.75945	7.77882	1648	0.776199	3	2	3	7.76962	834.356	834.36	Lac-AEJ-JEA|2	52872
1529	7.33093	7.46943	1529	0.973999	12	2	3	7.38505	834.361	834.36	Lac-AEJ-JEA|2	172519
1446	6.97764	7.0317	1446	0.995304	6	2	2	6.99731	834.36	834.36	Lac-AEJ-JEA|2	97865
3335	12.854	13.7939	3335	0.997589	170	2;1	3	13.0325	906.382	906.382	Lac-AEJ-Lac-AEJ |2	105568368
5083	18.6005	19.1616	5083	0.946854	75	2;1	2	18.8492	977.419	977.419	Lac-AEJ-Lac-AEJA |2	415491
4348	16.2899	18.4131	4348	0.985362	356	2;1	2	17.1258	977.419	977.419	Lac-AEJ-Lac-AEJA |2	1801221
7232	27.8458	27.9954	7232	0.997548	24	2;1	3	27.898	977.419	977.419	Lac-AEJ-Lac-AEJA |2	481138
3705	14.0164	16.2306	3705	0.998838	488	2;1	2	14.67	977.418	977.419	Lac-AEJ-Lac-AEJA |2	1455901184
16	0.546983	1.57491	16	0.998751	177	2;1	2	0.939837	977.42	977.419	Lac-AEJ-Lac-AEJA |2	327100
7600	29.5608	29.6682	7600	0.946848	5	2	2	29.606	977.419	977.419	Lac-AEJ-Lac-AEJA |2	42231
5299	19.3448	19.6221	5299	0.990938	39	1;2	3	19.473	977.419	977.419	Lac-AEJ-Lac-AEJA |2	254538
6263	23.1503	23.2317	6263	0.992794	3	1;2	2	23.1884	977.417	977.419	Lac-AEJ-Lac-AEJA |2	55156
5403	19.7441	19.8242	5403	0.983585	10	2	2	19.7842	977.419	977.419	Lac-AEJ-Lac-AEJA |2	170322
6353	23.6132	23.6576	6353	0.990031	5	1	2	23.6346	977.423	977.419	Lac-AEJ-Lac-AEJA |2	65271
6417	23.9475	24.0878	6417	0.93593	13	2;1	2	24.0178	977.421	977.419	Lac-AEJ-Lac-AEJA |2	57332
5845	21.35	21.3678	5845	0.943186	3	2	3	21.3577	977.419	977.419	Lac-AEJ-Lac-AEJA |2	124349
5729	20.9419	21.1043	5729	0.983463	13	2	2	21.0154	977.421	977.419	Lac-AEJ-Lac-AEJA |2	129795
5509	20.1283	20.2891	5509	0.997095	13	2	3	20.1969	977.42	977.419	Lac-AEJ-Lac-AEJA |2	142856
6796	25.7037	25.7281	6796	0.96611	4	2	3	25.717	977.421	977.419	Lac-AEJ-Lac-AEJA |2	37299
6873	25.9964	26.1199	6873	0.947122	8	2	2	26.0673	977.42	977.419	Lac-AEJ-Lac-AEJA |2	32337
6169	22.7499	22.8831	6169	0.990357	7	2	2	22.8096	977.42	977.419	Lac-AEJ-Lac-AEJA |2	82370
7560	29.3167	29.3769	7560	0.992954	4	1	2	29.3515	533.234	533.233	Lac-AEJA |1	82896
7229	27.7947	28.0041	7229	0.999316	20	1	2	27.8907	533.233	533.233	Lac-AEJA |1	1178319
7638	29.5608	29.6152	7638	0.997338	7	1	2	29.5763	533.234	533.233	Lac-AEJA |1	122308
7354	28.395	28.992	7354	0.997938	57	1	2	28.6663	533.233	533.233	Lac-AEJA |1	144315
7300	28.1274	28.2077	7300	0.993682	7	1	2	28.1596	533.234	533.233	Lac-AEJA |1	151656
34	0.546983	0.654793	34	0.999992	8	1	2	0.590889	533.234	533.233	Lac-AEJA |1	521493
7518	29.1737	29.2546	7518	0.999935	6	1	2	29.2146	533.234	533.233	Lac-AEJA |1	78977
5446	19.8935	19.9528	5446	0.994757	6	1	2	19.9151	533.234	533.233	Lac-AEJA |1	630361
4886	17.7222	17.864	4886	0.872984	5	1	2	17.7901	533.234	533.233	Lac-AEJA |1	191126
1289	6.06341	6.44842	1289	0.999531	57	1;2	2	6.41961	533.233	533.233	Lac-AEJA |1	2009959936
1347	6.52532	8.90734	1347	0.999629	320	1;2	2	6.61406	533.233	533.233	Lac-AEJA |1	2030900224
2943	11.7456	12.0152	2943	0.997061	21	1	2	11.8725	533.234	533.233	Lac-AEJA |1	165451
2752	11.2308	11.2567	2752	0.997861	3	1	2	11.2445	533.233	533.233	Lac-AEJA |1	178117
3301	12.7732	12.8627	3301	0.953277	5	1	2	12.8195	533.234	533.233	Lac-AEJA |1	75413
3095	12.1492	12.1865	3095	0.994733	5	1	2	12.1687	533.232	533.233	Lac-AEJA |1	131543
2605	10.8306	11.0623	2605	0.999951	23	1	2	10.9213	533.234	533.233	Lac-AEJA |1	889668
2820	11.3725	11.4697	2820	0.998271	5	1	2	11.4227	533.233	533.233	Lac-AEJA |1	208562
990	4.74424	4.91449	990	0.999901	16	1	2	4.85335	533.234	533.233	Lac-AEJA |1	197208
3131	12.2921	12.5053	3131	0.997517	12	1	2	12.3882	533.233	533.233	Lac-AEJA |1	155093
1167	5.51028	5.61642	1167	0.993854	6	1	2	5.56608	533.233	533.233	Lac-AEJA |1	69303
2388	10.147	10.4008	2388	0.996394	23	1	2	10.2908	533.233	533.233	Lac-AEJA |1	271021
1117	5.34371	5.37177	1117	0.999446	3	1	2	5.35638	533.234	533.233	Lac-AEJA |1	69426
2062	8.97042	9.98959	2062	0.995316	112	1	2	9.45529	533.234	533.233	Lac-AEJA |1	429800
2573	10.628	10.6625	2573	0.998965	3	1	2	10.643	533.234	533.233	Lac-AEJA |1	274855
2899	11.6308	11.6936	2899	0.995048	7	1	2	11.665	533.234	533.233	Lac-AEJA |1	157424
5662	20.7376	20.8522	5662	0.936363	16	2;3	3	20.7756	1922.81	1922.81	Lac-AEJA-(Lac-AEJ)2-Lac-AEJG |4	834349
5529	20.2072	20.6079	5529	0.972635	82	3;2	3	20.3969	1922.81	1922.81	Lac-AEJA-(Lac-AEJ)2-Lac-AEJG |4	2995389
5639	20.581	20.789	5639	0.959365	24	2;3	3	20.6771	1865.79	1865.79	Lac-AEJA-(Lac-AEJ)3 |4	985404
5740	20.9864	21.5842	5740	0.99105	119	2;3	3	21.1784	1865.79	1865.79	Lac-AEJA-(Lac-AEJ)3 |4	21633242
6025	22.1315	22.2039	6025	0.958176	4	2	3	22.1696	1865.8	1865.79	Lac-AEJA-(Lac-AEJ)3 |4	81927
5966	21.9195	22.0614	5966	0.803805	8	2	4	21.9954	1865.79	1865.79	Lac-AEJA-(Lac-AEJ)3 |4	101296
6228	22.9892	23.3576	6228	0.996125	67	3;2	5	23.1216	2309.98	2309.98	Lac-AEJA-(Lac-AEJ)4 |5	1154522
4094	15.293	15.9198	4094	0.996367	131	2;1	3	15.5269	1048.46	1048.46	Lac-AEJA-Lac-AEJA |2	492618304
11	0.546983	0.97318	11	0.997107	40	2;1	2	0.731318	1048.46	1048.46	Lac-AEJA-Lac-AEJA |2	91085
3465	13.3275	13.3716	3465	0.983113	6	2	3	13.3483	1048.46	1048.46	Lac-AEJA-Lac-AEJA |2	397453
5101	18.6443	18.7706	5101	0.993005	7	2	3	18.7107	1048.46	1048.46	Lac-AEJA-Lac-AEJA |2	186651
4279	15.9821	17.3991	4279	0.99788	288	2;1	3	16.283	1048.46	1048.46	Lac-AEJA-Lac-AEJA |2	342863488
97	1.08057	1.14669	97	0.997054	6	2	3	1.11137	1048.46	1048.46	Lac-AEJA-Lac-AEJA |2	37942
4782	17.463	17.4893	4782	0.997977	3	1	2	17.4736	1048.46	1048.46	Lac-AEJA-Lac-AEJA |2	154462
4824	17.5705	17.9421	4824	0.99334	32	2	3	17.766	1048.46	1048.46	Lac-AEJA-Lac-AEJA |2	430244
5065	18.5918	19.1178	5065	0.922015	38	2	3	18.7865	1478.63	1478.63	Lac-AEJA-LacAEJG-LacAEJ |3	369094
4800	17.5176	18.4482	4800	0.995334	118	2;1	3	17.7304	1478.63	1478.63	Lac-AEJA-LacAEJG-LacAEJ |3	34718408
4350	16.2981	16.4302	4350	0.998514	15	2	3	16.3462	1119.49	1119.49	Lac-AEJAA-Lac-AEJA |2	2578847
4438	16.5002	16.6082	4438	0.995123	12	2	3	16.5481	1119.5	1119.49	Lac-AEJAA-Lac-AEJA |2	400538
4610	16.9707	17.078	4610	0.999653	13	2	3	17.031	1119.5	1119.49	Lac-AEJAA-Lac-AEJA |2	591582
2093	9.11908	9.36228	2093	0.999999	29	1	2	9.23912	604.271	604.27	Lac-AEJAA|1	5418975
2000	8.82866	9.06643	2000	0.999088	44	1;2	2	8.9303	604.271	604.27	Lac-AEJAA|1	2484282
2464	10.3035	10.4095	2464	0.999705	11	1;2	2	10.3416	604.271	604.27	Lac-AEJAA|1	349736
2561	10.5586	10.7873	2561	0.999477	27	1	2	10.692	604.27	604.27	Lac-AEJAA|1	4857150
1066	5.15798	5.58193	1066	0.999899	63	1;2	2	5.37729	604.271	604.27	Lac-AEJAA|1	616173
5599	20.4478	21.148	5599	0.998827	111	1;2	2	20.7142	609.265	609.269	Lac-AEJF |1	330159648
6017	22.1315	22.3753	6017	0.999947	35	2;1	2	22.2569	609.265	609.269	Lac-AEJF |1	3097294
6730	25.4213	27.4491	6730	0.999077	401	1;2	3	25.645	1053.45	1053.45	Lac-AEJF-Lac-AEJ |2	146709760
17	0.546983	0.574654	17	0.999175	4	2	3	0.565649	1053.45	1053.45	Lac-AEJF-Lac-AEJ |2	69379
6937	26.3103	26.9358	6937	0.999066	113	1;2	3	26.4632	1124.49	1124.49	Lac-AEJF-Lac-AEJA |2	27463068
6738	25.4495	25.7037	6738	0.989023	46	2;1	3	25.5591	1124.49	1124.49	Lac-AEJF-Lac-AEJA |2	3870353
7327	28.2605	28.491	7327	0.999928	50	1;2	3	28.3564	1124.49	1124.49	Lac-AEJF-Lac-AEJA |2	1400064
7134	27.1012	27.1449	7134	0.999059	3	2	3	27.1236	1124.49	1124.49	Lac-AEJF-Lac-AEJA |2	66500
7172	27.2391	27.5974	7172	0.999015	67	2;1	3	27.4078	1124.49	1124.49	Lac-AEJF-Lac-AEJA |2	2229892
7298	28.1013	28.1536	7298	0.958952	3	2	3	28.1218	1124.49	1124.49	Lac-AEJF-Lac-AEJA |2	62367
6866	26.0145	26.1772	6866	0.999048	33	1;2	3	26.1032	1124.49	1124.49	Lac-AEJF-Lac-AEJA |2	421619
7430	28.786	28.9345	7430	0.997596	26	2;1	3	28.8554	1124.49	1124.49	Lac-AEJF-Lac-AEJA |2	310794
1880	8.49973	8.53648	1880	0.905305	3	1	2	8.5232	519.218	519.218	Lac-AEJG |1	148391
1187	5.59048	5.76564	1187	0.998627	7	1	2	5.67085	519.218	519.218	Lac-AEJG |1	116056
1280	6.01106	6.32643	1280	0.999815	35	1	2	6.12732	519.219	519.218	Lac-AEJG |1	211059
1938	8.64083	8.68685	1938	0.994647	6	1	2	8.66501	519.219	519.218	Lac-AEJG |1	172225
2040	8.9249	9.0316	2040	0.99409	10	1	2	8.97207	519.218	519.218	Lac-AEJG |1	91097
1041	5.09742	5.16667	1041	0.992256	7	1	2	5.13587	519.219	519.218	Lac-AEJG |1	168604
737	3.83045	4.75289	737	0.999951	146	1;2	2	4.05147	519.218	519.218	Lac-AEJG |1	277117600
1022	4.90583	4.94019	1022	0.997511	4	1	2	4.92513	519.218	519.218	Lac-AEJG |1	206003
4100	15.3191	15.3906	4100	0.803674	4	2	2	15.3558	963.402	963.403	Lac-AEJG-Lac-AEJ |2	143971
2611	10.822	10.9198	2611	0.999578	9	2	3	10.8692	963.403	963.403	Lac-AEJG-Lac-AEJ |2	209914
4223	15.7178	15.7699	4223	0.985936	3	2	3	15.7497	963.404	963.403	Lac-AEJG-Lac-AEJ |2	156898
4329	16.1428	16.1773	4329	0.992249	3	2	2	16.1607	963.404	963.403	Lac-AEJG-Lac-AEJ |2	163361
3234	12.5492	14.2865	3234	0.996549	333	1;2	3	12.8004	963.403	963.403	Lac-AEJG-Lac-AEJ |2	305497280
3871	14.5634	14.6173	3871	0.985637	4	2	3	14.5933	963.405	963.403	Lac-AEJG-Lac-AEJ |2	215896
3589	13.6521	14.0424	3589	0.999563	81	1;2	3	13.8013	1034.44	1034.44	Lac-AEJG-Lac-AEJA |2	72111488
3827	14.4856	14.8281	3827	0.988332	57	1;2	3	14.6543	1034.44	1034.44	Lac-AEJG-Lac-AEJA |2	1960663
3181	12.4352	12.5669	3181	0.992163	21	2;1	3	12.4877	1034.44	1034.44	Lac-AEJG-Lac-AEJA |2	594415
4106	15.3646	15.444	4106	0.925177	10	1;2	3	15.3994	1034.44	1034.44	Lac-AEJG-Lac-AEJA |2	429009
3783	14.2695	14.3945	3783	0.999914	28	2;1	2	14.3473	1034.44	1034.44	Lac-AEJG-Lac-AEJA |2	11879398
584	3.15584	3.32325	584	0.996082	32	2;1	2	3.22916	599.255	599.26	Lac-AEJH |1	3003441
645	3.46203	3.86499	645	0.997335	70	2;1	3	3.59055	599.255	599.26	Lac-AEJH |1	7175625
2713	11.0712	11.1508	2713	0.944595	7	2	3	11.1056	1043.44	1043.45	Lac-AEJH-Lac-AEJ |2	91729
2877	11.5501	11.7543	2877	0.998531	24	2;1	3	11.6541	1043.44	1043.45	Lac-AEJH-Lac-AEJ |2	8356840
3014	11.9603	12.0768	3014	0.996514	14	2	3	12.0093	1043.44	1043.45	Lac-AEJH-Lac-AEJ |2	774449
2755	11.2666	11.4522	2755	0.996856	22	2	3	11.3515	1043.44	1043.45	Lac-AEJH-Lac-AEJ |2	4342389
3128	12.2921	12.655	3128	0.992418	34	2	3	12.524	1114.48	1114.48	Lac-AEJH-Lac-AEJA |2	3083174
499	2.8597	3.20898	499	0.99888	74	1;2	3	2.99965	590.291	590.296	Lac-AEJK |1	6928963
2958	11.7982	11.9956	2958	0.999044	23	2	3	11.8893	1034.48	1034.48	Lac-AEJK-Lac-AEJ |2	3617426
2747	11.2222	11.5326	2747	0.999528	35	2;1	3	11.3271	1034.48	1034.48	Lac-AEJK-Lac-AEJ |2	23353102
3122	12.2663	12.4875	3122	0.999996	26	2	3	12.3596	1105.51	1105.52	Lac-AEJK-Lac-AEJA |2	5604149
3466	13.346	13.4787	3466	0.997086	15	2	3	13.3935	1105.52	1105.52	Lac-AEJK-Lac-AEJA |2	1806763
3375	13.0092	13.0859	3375	0.998617	8	2	3	13.05	1105.51	1105.52	Lac-AEJK-Lac-AEJA |2	1202890
3641	13.837	13.9256	3641	0.991258	11	2	3	13.8766	1105.51	1105.52	Lac-AEJK-Lac-AEJA |2	536028
6278	23.267	23.6308	6278	0.996868	33	2	3	23.488	1108.46	1108.46	Lac-AEJM-Lac-AEJA |2	207542
870	4.37213	4.76363	870	0.998486	104	2;1	3	4.54092	618.297	618.301	Lac-AEJR |1	7072737
729	3.83045	4.26542	729	0.99893	89	1;2	3	3.98781	618.297	618.301	Lac-AEJR |1	17898462
3261	12.697	12.9061	3261	0.982389	46	2;1	3	12.7671	1062.48	1062.49	Lac-AEJR-Lac-AEJ |2	4187701
3076	12.1403	12.5226	3076	0.999744	49	2	3	12.2813	1062.48	1062.49	Lac-AEJR-Lac-AEJ |2	22872350
3397	13.137	13.5049	3397	0.999783	39	2	3	13.2602	1133.52	1133.52	Lac-AEJR-Lac-AEJA |2	6631021
3640	13.8286	13.9363	3640	0.997598	13	2	3	13.8766	1133.52	1133.52	Lac-AEJR-Lac-AEJA |2	857052
1203	5.70294	6.16766	1203	0.998956	82	1;2	2	5.93114	549.229	549.233	Lac-AEJS |1	1218890
927	4.5587	4.65454	927	0.985409	9	1	2	4.60637	549.23	549.233	Lac-AEJS |1	249872
1037	5.06984	5.60777	1037	0.999918	68	1;2	2	5.30417	549.229	549.233	Lac-AEJS |1	1443198
632	3.44471	3.70681	632	0.997796	21	1;2	2	3.50277	549.229	549.233	Lac-AEJS |1	4411845
975	4.72676	4.85357	975	0.996552	15	1	2	4.77874	549.23	549.233	Lac-AEJS |1	776843
3266	12.7218	13.035	3266	0.996381	48	2;1	3	12.8227	993.414	993.419	Lac-AEJS-Lac-AEJ |2	2489986
3406	13.1625	13.182	3406	0.921642	3	2	3	13.1739	993.411	993.419	Lac-AEJS-Lac-AEJ |2	253255
3440	13.2754	13.4698	3440	0.98534	33	2;1	3	13.3774	993.415	993.419	Lac-AEJS-Lac-AEJ |2	671298
3907	14.7219	15.0651	3907	0.996714	41	2;1	3	14.8684	993.415	993.419	Lac-AEJS-Lac-AEJ |2	676398
3541	13.5652	14.2172	3541	0.999009	129	1;2	3	13.867	993.415	993.419	Lac-AEJS-Lac-AEJ |2	1811335
3052	12.0416	12.6295	3052	0.996769	100	1;2	3	12.2695	993.414	993.419	Lac-AEJS-Lac-AEJ |2	9750467
3841	14.5027	14.572	3841	0.992459	6	2	2	14.535	993.415	993.419	Lac-AEJS-Lac-AEJ |2	403591
4189	15.6836	15.9821	4189	0.926668	23	2	3	15.843	1064.45	1064.46	Lac-AEJS-Lac-AEJA |2	245015
3974	14.9505	15.0022	3974	0.870268	3	2	3	14.9759	1064.45	1064.46	Lac-AEJS-Lac-AEJA |2	230584
3443	13.2842	13.4876	3443	0.990494	39	2;1	3	13.3522	1064.45	1064.46	Lac-AEJS-Lac-AEJA |2	2804960
4049	15.2761	15.3017	4049	0.988672	4	2	3	15.2877	1064.45	1064.46	Lac-AEJS-Lac-AEJA |2	364190
3665	13.8733	14.1205	3665	0.988025	30	2;1	3	13.9922	1064.45	1064.46	Lac-AEJS-Lac-AEJA |2	793270
3957	14.8281	14.8988	3957	0.989158	4	2	3	14.869	1064.45	1064.46	Lac-AEJS-Lac-AEJA |2	217562
3643	13.837	14.086	3643	0.998938	29	1	2	14.029	561.265	561.269	Lac-AEJV |1	2497547
7472	28.9506	29.3167	7472	0.992149	45	1	2	29.1312	561.265	561.269	Lac-AEJV |1	78560
3496	13.3979	13.7683	3496	0.999972	62	2;1	2	13.5527	561.265	561.269	Lac-AEJV |1	140365408
3021	11.9513	12.0768	3021	0.997746	14	1	2	12.0141	561.265	561.269	Lac-AEJV |1	416084
4755	17.3904	17.4364	4755	0.966614	5	2	3	17.4182	1005.45	1005.45	Lac-AEJV-Lac-AEJ |2	262860
5424	19.8064	20.3156	5424	0.999314	99	2;1	3	19.9239	1005.45	1005.45	Lac-AEJV-Lac-AEJ |2	28139180
5658	20.7118	20.8784	5658	0.978425	38	2;1	3	20.7696	1005.45	1005.45	Lac-AEJV-Lac-AEJ |2	4211303
5926	21.8214	21.9461	5926	0.999122	25	2;1	3	21.878	1076.49	1076.49	Lac-AEJV-Lac-AEJA |2	594917
5617	20.4828	20.5089	5617	0.984545	3	2	3	20.4965	1076.49	1076.49	Lac-AEJV-Lac-AEJA |2	188297
5717	20.8871	21.0936	5717	0.998214	41	2;1	3	20.9979	1076.49	1076.49	Lac-AEJV-Lac-AEJA |2	4874111
4976	18.193	18.2718	4976	0.992986	8	1	2	18.2293	625.259	625.261	Lac-AEJY |1	756896
4081	15.3191	15.7265	4081	0.999537	68	1;2	2	15.4687	625.259	625.261	Lac-AEJY |1	112547096
7150	27.1361	27.1611	7150	0.983364	3	1	2	27.1473	625.261	625.261	Lac-AEJY |1	52368
4376	16.3406	16.4302	4376	1	11	1	2	16.378	625.261	625.261	Lac-AEJY |1	744344
5527	20.2338	20.6509	5527	0.998389	79	2;1	3	20.357	1069.45	1069.45	Lac-AEJY-Lac-AEJ |2	30518762
5667	20.7543	20.9864	5667	0.992253	46	1;2	3	20.8269	1069.45	1069.45	Lac-AEJY-Lac-AEJ |2	3827912
6609	24.9702	25.2117	6609	0.988776	31	1;2	3	25.091	1069.45	1069.45	Lac-AEJY-Lac-AEJ |2	114848
5776	21.113	21.2005	5776	0.983117	14	1;2	3	21.168	1069.45	1069.45	Lac-AEJY-Lac-AEJ |2	278970
6183	22.7847	22.8918	6183	0.975263	18	2;1	3	22.8391	1069.45	1069.45	Lac-AEJY-Lac-AEJ |2	234001
5732	20.9419	21.3678	5732	0.999301	88	2;1	3	21.1993	1140.48	1140.48	Lac-AEJY-Lac-AEJA |2	7303541
5872	21.5755	21.6272	5872	0.982957	4	2;1	3	21.5966	1140.48	1140.48	Lac-AEJY-Lac-AEJA |2	704134
5922	21.7785	22.085	5922	0.988966	37	2;1	3	21.8697	1140.48	1140.48	Lac-AEJY-Lac-AEJA |2	695927
1637	7.75945	8.277	1637	0.998297	68	1;2	2	7.88743	590.256	590.255	Lac-AEJ[AG]|1	1218140
1243	5.81794	6.03703	1243	0.995007	15	1;2	2	5.90755	590.255	590.255	Lac-AEJ[AG]|1	455188
1204	5.70294	5.77427	1204	0.998788	5	2;1	2	5.74302	590.256	590.255	Lac-AEJ[AG]|1	184505
1937	8.62353	8.83729	1937	0.998731	26	1;2	2	8.73454	590.255	590.255	Lac-AEJ[AG]|1	1665289
4083	15.3191	15.3993	4083	0.999749	10	1	2	15.3582	632.302	632.306	Lac-AEJ[AV]|1	580454
2294	9.73922	9.80141	2294	0.998917	5	1	2	9.76326	632.303	632.306	Lac-AEJ[AV]|1	58117
2935	11.7196	12.0327	2935	0.999458	60	2;1	3	11.8233	1020.43	1020.42	Lac-AEJ[GG]-Lac-AEJ |2	7071624
3109	12.1668	12.4158	3109	0.993492	24	2;1	3	12.2883	1020.43	1020.42	Lac-AEJ[GG]-Lac-AEJ |2	792286
4725	17.3445	17.3904	4725	0.975021	6	2	3	17.3687	1020.43	1020.42	Lac-AEJ[GG]-Lac-AEJ |2	226569
3302	12.7647	12.9061	3302	0.985137	27	2;1	3	12.8288	1091.46	1091.46	Lac-AEJ[GG]-Lac-AEJA |2	2312199
2880	11.5676	11.6308	2880	0.994407	6	1	2	11.5914	576.24	576.239	Lac-AEJ[GG]|1	272574
589	3.14722	3.43607	589	0.99933	45	1;2	2	3.25583	576.239	576.239	Lac-AEJ[GG]|1	4272557
4904	17.8272	18.4043	4904	0.999972	108	1;2	2	18.147	575.281	575.285	Lac-AEJ[L/I] |1	162171136
6354	23.6308	24.8047	6354	0.999192	214	2;1	3	23.8335	1019.47	1019.47	Lac-AEJ[L/I]-Lac-AEJ |2	81467488
6591	24.8987	25.1498	6591	0.97688	32	2;1	3	24.9777	1019.47	1019.47	Lac-AEJ[L/I]-Lac-AEJ |2	330680
6508	24.3131	24.419	6508	0.991311	19	2;1	3	24.3546	1090.5	1090.51	Lac-AEJ[L/I]-Lac-AEJA |2	556116
6756	25.624	26.1274	6756	0.901534	82	2;1	3	25.8039	1090.5	1090.51	Lac-AEJ[L/I]-Lac-AEJA |2	778257
6276	23.267	23.3901	6276	0.982087	19	2;1	3	23.3124	1090.5	1090.51	Lac-AEJ[L/I]-Lac-AEJA |2	270019
6577	24.6935	25.4154	6577	0.999862	131	2;1;3	3	24.8354	1090.5	1090.51	Lac-AEJ[L/I]-Lac-AEJA |2	24362452
7003	26.5593	26.6319	7003	0.975281	10	2	3	26.5941	1090.5	1090.51	Lac-AEJ[L/I]-Lac-AEJA |2	51664
609	3.23494	3.87364	609	0.9998	69	1	2	3.41016	462.196	462.196	Lac-AEJ|1	88127664
2037	8.94426	8.97042	2037	0.998648	3	1	2	8.95399	462.197	462.196	Lac-AEJ|1	105741

## Sheet: R20291.2
ID	xicStart	xicEnd	feature	corrMax	ionCount	chargeOrder	maxIsotopeCount	rt	mwMonoisotopic	theo_mwMonoisotopic	inferredStructure	maxIntensity		Structure	Intensity	RT	Abundance	Oligomerisation state
8247	31.9972	32.0154	8247	0.955045	3	2	3	32.0057	1421.61	1421.6	(Lac-AEJ)2-Lac-AEJA |3	43447		Lac-AEJA |1	4111729247	6.67007	0.32234	1
7232	26.2696	26.3491	7232	0.756952	7	2	3	26.3129	1421.61	1421.6	(Lac-AEJ)2-Lac-AEJA |3	93049		Lac-AEJF |1	618872770	20.6874	0.0485166	1
6755	23.8494	24.6026	6755	0.999506	78	2	3	24.2082	1421.6	1421.6	(Lac-AEJ)2-Lac-AEJA |3	182248		Lac-AEJG |1	606878412	4.03202	0.0475763	1
7265	26.5059	26.7517	7265	0.999316	32	2	3	26.6236	1421.61	1421.6	(Lac-AEJ)2-Lac-AEJA |3	106440		Lac-AEJ[L/I] |1	301367117	18.1147	0.0236257	1
7334	26.8601	27.3671	7334	0.902864	50	2	3	27.1224	1421.61	1421.6	(Lac-AEJ)2-Lac-AEJA |3	93175		Lac-AEJV |1	234061069	13.5323	0.0183493	1
6533	22.6263	23.6853	6533	0.986696	98	2;3	3	23.1137	1421.61	1421.6	(Lac-AEJ)2-Lac-AEJA |3	293123		Lac-AEJ|1	191400511	3.39419	0.0150049	1
7446	27.4564	27.5885	7446	0.949167	11	2	3	27.542	1421.61	1421.6	(Lac-AEJ)2-Lac-AEJA |3	95032		Lac-AEJY |1	187253517	15.4359	0.0146798	1
7478	27.6804	28.1885	7478	0.992704	43	2	3	27.9331	1421.61	1421.6	(Lac-AEJ)2-Lac-AEJA |3	100594		Lac-AEJR |1	40914702	3.95667	0.00320751	1
6338	21.7993	22.5479	6338	0.962985	75	2	3	22.1868	1421.6	1421.6	(Lac-AEJ)2-Lac-AEJA |3	357707		Lac-AEJAA|1	19237348	9.11224	0.00150811	1
7620	28.3733	28.7259	7620	0.927295	34	2	3	28.5663	1421.61	1421.6	(Lac-AEJ)2-Lac-AEJA |3	76057		Lac-AEJH |1	17609488	3.5649	0.0013805	1
6065	20.7659	21.7384	6065	0.994625	98	2	3	21.251	1421.61	1421.6	(Lac-AEJ)2-Lac-AEJA |3	479891		Lac-AEJS |1	14003622	3.48753	0.00109782	1
6956	24.8319	25.4398	6956	0.950566	57	2	3	25.1517	1421.61	1421.6	(Lac-AEJ)2-Lac-AEJA |3	133384		Lac-AEJK |1	9521542	2.99183	0.000746443	1
7706	28.8858	29.0576	7706	0.961134	17	2	3	28.9606	1421.61	1421.6	(Lac-AEJ)2-Lac-AEJA |3	72690		Lac-AEJ[GG]|1	7542151	3.2481	0.000591268	1
5915	20.155	20.394	5915	0.878767	17	2	3	20.2515	1421.6	1421.6	(Lac-AEJ)2-Lac-AEJA |3	329414		Lac-AEJ[AG]|1	6425942	8.70562	0.000503763	1
6024	20.5002	20.6044	6024	0.990397	8	2	3	20.5619	1421.61	1421.6	(Lac-AEJ)2-Lac-AEJA |3	738380		Lac-AEJ[AV]|1	1769663	15.3308	0.000138733	1
5406	18.2077	19.9267	5406	0.99895	221	2;1	3	18.4873	1421.61	1421.6	(Lac-AEJ)2-Lac-AEJA |3	610196416		Lac-AEJ-Lac-AEJA |2	1986900303	14.6283	0.155763	2
20	0.543303	1.36581	20	0.999815	121	2	3	0.875247	1421.61	1421.6	(Lac-AEJ)2-Lac-AEJA |3	168382		Lac-AEJA-Lac-AEJA |2	1155505387	15.4991	0.090586	2
8196	31.6768	31.7501	8196	0.992466	7	2	3	31.7182	1421.61	1421.6	(Lac-AEJ)2-Lac-AEJA |3	51732		Lac-AEJG-Lac-AEJ |2	497406852	12.7704	0.0389943	2
8155	31.3981	31.5912	8155	0.976892	18	2	3	31.4768	1421.61	1421.6	(Lac-AEJ)2-Lac-AEJA |3	62098		Lac-AEJF-Lac-AEJ |2	221725244	25.6332	0.0173822	2
130	1.40118	1.5624	130	0.986214	14	2	3	1.47383	1421.61	1421.6	(Lac-AEJ)2-Lac-AEJA |3	32279		Lac-AEJ-JEA|2	180790339	14.3528	0.0141731	2
7743	29.1083	29.3902	7743	0.987246	24	2	3	29.2386	1421.61	1421.6	(Lac-AEJ)2-Lac-AEJA |3	59565		Lac-AEJ-Lac-AEJ |2	180057778	12.9392	0.0141157	2
8004	30.6094	31.3514	8004	0.96949	66	2	3	30.9949	1421.6	1421.6	(Lac-AEJ)2-Lac-AEJA |3	53676		Lac-AEJG-Lac-AEJA |2	132845542	13.7683	0.0104144	2
7107	25.6926	26.1805	7107	0.974742	54	2	3	25.9245	1421.61	1421.6	(Lac-AEJ)2-Lac-AEJA |3	98785		Lac-AEJ[L/I]-Lac-AEJ |2	119602327	23.7827	0.00937624	2
7945	30.3035	30.5561	7945	0.961503	18	2	3	30.4411	1421.61	1421.6	(Lac-AEJ)2-Lac-AEJA |3	64628		Lac-AEJF-Lac-AEJA |2	59924885	26.4404	0.00469782	2
5326	17.8597	18.0847	5326	0.993565	31	1;2	3	17.929	1421.61	1421.6	(Lac-AEJ)2-Lac-AEJA |3	18356172		Lac-AEJY-Lac-AEJ |2	54772546	20.3327	0.0042939	2
7864	29.7862	30.1078	7864	0.942055	25	2	3	29.9387	1421.61	1421.6	(Lac-AEJ)2-Lac-AEJA |3	65614		Lac-AEJV-Lac-AEJ |2	47242328	19.8967	0.00370357	2
7825	29.4652	29.6529	7825	0.929518	15	2	3	29.5643	1421.61	1421.6	(Lac-AEJ)2-Lac-AEJA |3	71475		Lac-AEJR-Lac-AEJ |2	41881684	12.2458	0.00328332	2
8238	31.8927	31.9559	8238	0.99616	4	2	3	31.9332	1421.61	1421.6	(Lac-AEJ)2-Lac-AEJA |3	48686		Lac-AEJK-Lac-AEJ |2	41605436	11.2813	0.00326166	2
5262	17.6917	17.8235	5262	0.984554	8	2	3	17.7597	1407.59	1407.59	(Lac-AEJ)2-Lac-AEJG |3	251559		Lac-AEJ[L/I]-Lac-AEJA |2	26359872	24.8161	0.00206649	2
6322	21.7297	22.0836	6322	0.9839	35	2	3	21.8636	1407.58	1407.59	(Lac-AEJ)2-Lac-AEJG |3	726955		Lac-AEJH-Lac-AEJ |2	23395702	11.6069	0.00183411	2
6684	23.391	23.5072	6684	0.969486	11	2	3	23.454	1407.58	1407.59	(Lac-AEJ)2-Lac-AEJG |3	231666		Lac-AEJS-Lac-AEJ |2	22371315	12.2281	0.0017538	2
5219	17.5423	17.5855	5219	0.98299	4	2	3	17.5602	1407.59	1407.59	(Lac-AEJ)2-Lac-AEJG |3	333896		Lac-AEJK-Lac-AEJA |2	14651777	12.3242	0.00114863	2
6731	23.6412	23.6766	6731	0.947063	3	2	3	23.661	1407.58	1407.59	(Lac-AEJ)2-Lac-AEJG |3	152118		Lac-AEJ[GG]-Lac-AEJ |2	13066737	11.777	0.00102437	2
6864	24.2804	24.413	6864	0.98389	12	2	3	24.3568	1407.58	1407.59	(Lac-AEJ)2-Lac-AEJG |3	109350		Lac-AEJY-Lac-AEJA |2	12726248	21.2017	0.000997676	2
6460	22.3611	22.539	6460	0.993165	20	2	3	22.4483	1407.58	1407.59	(Lac-AEJ)2-Lac-AEJG |3	567684		Lac-AEJR-Lac-AEJA |2	11869917	13.2312	0.000930544	2
4906	16.6827	17.4877	4906	0.999242	113	2;1	3	16.847	1407.59	1407.59	(Lac-AEJ)2-Lac-AEJG |3	119064992		Lac-AEJV-Lac-AEJA |2	8423843	20.9765	0.000660388	2
5028	17.0263	17.7178	5028	0.996596	87	2;1	3	17.1677	1350.57	1350.57	(Lac-AEJ)3 |3	33058354		Lac-AEJS-Lac-AEJA |2	6249497	13.3242	0.00048993	2
6851	24.2609	24.4486	6851	0.96051	20	2	3	24.3585	1851.77	1851.77	(Lac-AEJ)3-Lac-AEJG |4	380715		Lac-AEJAA-Lac-AEJA |2	5810323	16.3344	0.000455501	2
7167	25.9094	26.0305	7167	0.877364	12	2	4	25.9605	1851.77	1851.77	(Lac-AEJ)3-Lac-AEJG |4	79752		Lac-AEJH-Lac-AEJA |2	5496627	12.4887	0.000430909	2
6802	24.0196	24.0461	6802	0.949936	3	2	3	24.0335	1851.77	1851.77	(Lac-AEJ)3-Lac-AEJG |4	77591		Lac-AEJ[GG]-Lac-AEJA |2	3576555	12.8018	0.000280385	2
7032	25.223	25.2573	7032	0.946692	4	2	3	25.2399	1851.78	1851.77	(Lac-AEJ)3-Lac-AEJG |4	60120		Lac-AEJM-Lac-AEJA |2	198952	23.445	1.55969e-05	2
7257	26.4712	26.6335	7257	0.986851	14	2	3	26.5491	1851.77	1851.77	(Lac-AEJ)3-Lac-AEJG |4	126161		(Lac-AEJ)2-Lac-AEJA |3	632524139	18.4873	0.0495868	3
5874	19.9872	20.0479	5874	0.926625	6	2	3	20.0149	1851.78	1851.77	(Lac-AEJ)3-Lac-AEJG |4	440611		(Lac-AEJA)2-LacAEJ |3	441099113	19.3619	0.03458	3
5774	19.5515	19.876	5774	0.988431	60	2;3	3	19.7371	1851.78	1851.77	(Lac-AEJ)3-Lac-AEJG |4	5090400		(Lac-AEJ)2-Lac-AEJG |3	121438220	16.847	0.00952017	3
5860	19.9011	20.1374	5860	0.989711	21	2	3	20.0216	1794.76	1794.75	(Lac-AEJ)4 |4	2525123		(Lac-AEJA)3 |3	99417083	20.1306	0.00779382	3
6188	21.2368	21.3698	6188	0.9972	25	2;3	3	21.2993	1936.83	1936.83	(Lac-AEJA)2-(Lac-AEJ)2 |4	594433		Lac-AEJA-LacAEJG-LacAEJ |3	54690537	17.7107	0.00428747	3
6280	21.5674	22.5566	6280	0.994505	214	2;3	3	21.8635	1936.83	1936.83	(Lac-AEJA)2-(Lac-AEJ)2 |4	35190644		(Lac-AEJ)3 |3	33058354	17.1677	0.00259161	3
6525	22.6263	22.8753	6525	0.93546	22	2;3	3	22.7479	1936.83	1936.83	(Lac-AEJA)2-(Lac-AEJ)2 |4	263714		(Lac-AEJA)2-LacAEJG |3	12913275	18.4094	0.00101234	3
6601	22.9305	23.0636	6601	0.884976	8	2	3	22.9903	1936.84	1936.83	(Lac-AEJA)2-(Lac-AEJ)2 |4	136332		(Lac-AEJG)2-LacAEJ |3	2054664	16.0484	0.000161076	3
6634	23.1512	23.2744	6634	0.842715	5	3	3	23.2097	2381.03	2381.01	(Lac-AEJA)2-(Lac-AEJ)3 |5	102707		(Lac-AEJG)2-LacAEJA |3	1342473	16.835	0.000105243	3
6687	23.4176	24.0903	6687	0.975135	126	3;2	5	23.7017	2381.01	2381.01	(Lac-AEJA)2-(Lac-AEJ)3 |5	2992383		(Lac-AEJA)2-(Lac-AEJ)2 |4	36185123	21.8635	0.00283674	4
6184	21.2282	21.4863	6184	0.952153	46	3;2	4	21.33	1993.86	1993.85	(Lac-AEJA)2-Lac-AEJ-Lac-AEJG |4	410402		Lac-AEJA-(Lac-AEJ)3 |4	32665828	21.1597	0.00256084	4
6108	20.8815	21.1482	6108	0.961071	58	2;3	3	21.0129	1993.85	1993.85	(Lac-AEJA)2-Lac-AEJ-Lac-AEJG |4	1331739		(Lac-AEJA)3-Lac-AEJ |4	14059516	22.4987	0.0011022	4
6056	20.7317	20.7744	6056	0.949881	5	2	3	20.7484	1492.64	1492.64	(Lac-AEJA)2-LacAEJ |3	1144778		Lac-AEJA-(Lac-AEJ)2-Lac-AEJG |4	6376613	20.3759	0.000499896	4
5614	18.9731	20.6129	5614	0.99443	229	1;2	3	19.3619	1492.64	1492.64	(Lac-AEJA)2-LacAEJ |3	434201856		(Lac-AEJ)3-Lac-AEJG |4	6255350	19.7371	0.000490389	4
7765	29.1555	29.2304	7765	0.983355	3	2	3	29.196	1492.64	1492.64	(Lac-AEJA)2-LacAEJ |3	42459		(Lac-AEJA)4 |4	5023990	22.924	0.000393856	4
7881	29.8759	29.9761	7881	0.986546	6	2	3	29.9198	1492.64	1492.64	(Lac-AEJA)2-LacAEJ |3	34711		(Lac-AEJ)4 |4	2525123	20.0216	0.000197957	4
7719	28.9004	29.1083	7719	0.963099	10	2	3	29.0072	1492.65	1492.64	(Lac-AEJA)2-LacAEJ |3	40951		(Lac-AEJA)2-Lac-AEJ-Lac-AEJG |4	1742141	21.0129	0.000136575	4
7641	28.5	28.6922	7641	0.950976	11	2	3	28.608	1492.65	1492.64	(Lac-AEJA)2-LacAEJ |3	39833		(Lac-AEJA)3-Lac-AEJG |4	289536	21.6313	2.26982e-05	4
7984	30.5191	30.5472	7984	0.975013	3	2	3	30.5322	1492.64	1492.64	(Lac-AEJA)2-LacAEJ |3	48130		(Lac-AEJG)4 |4	75225	24.0326	5.89728e-06	4
8020	30.7088	30.7683	8020	0.983325	4	2	3	30.7365	1492.64	1492.64	(Lac-AEJA)2-LacAEJ |3	32789		(Lac-AEJA)2-(Lac-AEJ)3 |5	3095090	23.7017	0.00024264	5
8182	31.5912	31.6211	8182	0.979725	4	2	3	31.6048	1492.65	1492.64	(Lac-AEJA)2-LacAEJ |3	31554		(Lac-AEJA)3-(Lac-AEJ)2 |5	1988132	24.2625	0.00015586	5
5498	18.5964	18.7179	5498	0.996377	15	2	3	18.6652	1492.65	1492.64	(Lac-AEJA)2-LacAEJ |3	3178673		Lac-AEJA-(Lac-AEJ)4 |5	1921573	23.0851	0.000150642	5
6983	24.9584	25.4486	6983	0.949259	40	2	3	25.2088	1492.64	1492.64	(Lac-AEJA)2-LacAEJ |3	87495		(Lac-AEJA)4-Lac-AEJ |5	1587873	24.6371	0.000124482	5
6144	21.0263	21.07	6144	0.951212	4	2	3	21.0517	1492.64	1492.64	(Lac-AEJA)2-LacAEJ |3	190419		(Lac-AEJA)5 |5	517281	25.0853	4.05523e-05	5
7551	28.0434	28.1424	7551	0.936375	8	2	3	28.0963	1492.65	1492.64	(Lac-AEJA)2-LacAEJ |3	61474
6330	21.7645	22.5479	6330	0.90967	74	2	3	22.1375	1492.65	1492.64	(Lac-AEJA)2-LacAEJ |3	351673		Sum intensity	12755891369
7508	27.8194	27.9181	7508	0.995854	7	2	3	27.8761	1492.64	1492.64	(Lac-AEJA)2-LacAEJ |3	55762
7439	27.474	27.5633	7439	0.968054	6	2	3	27.519	1492.64	1492.64	(Lac-AEJA)2-LacAEJ |3	49032
7347	26.9191	27.3119	7347	0.950043	34	2	3	27.1237	1492.65	1492.64	(Lac-AEJA)2-LacAEJ |3	63159
6536	22.6699	22.8137	6536	0.982272	13	2	3	22.7459	1492.65	1492.64	(Lac-AEJA)2-LacAEJ |3	229931
6628	23.1252	23.4087	6628	0.994923	27	2	3	23.2615	1492.65	1492.64	(Lac-AEJA)2-LacAEJ |3	164702
7275	26.5253	26.7428	7275	0.946693	20	2	3	26.6211	1492.65	1492.64	(Lac-AEJA)2-LacAEJ |3	57984
6704	23.5337	23.6587	6704	0.890829	9	2	3	23.6057	1492.64	1492.64	(Lac-AEJA)2-LacAEJ |3	166369
7237	26.3044	26.3491	7237	0.994711	3	2	3	26.3236	1492.65	1492.64	(Lac-AEJA)2-LacAEJ |3	54109
6763	23.858	24.5102	6763	0.999715	48	2	3	24.1581	1492.65	1492.64	(Lac-AEJA)2-LacAEJ |3	151922
7114	25.7013	26.1894	7114	0.972926	43	2	3	25.9223	1492.64	1492.64	(Lac-AEJA)2-LacAEJ |3	114516
7621	28.3907	28.4437	7621	0.989406	3	2	3	28.4186	1492.65	1492.64	(Lac-AEJA)2-LacAEJ |3	46065
6291	21.5936	21.7123	6291	0.950019	12	2	3	21.6569	1492.65	1492.64	(Lac-AEJA)2-LacAEJ |3	319547
18	0.553153	0.808537	18	0.994434	27	2	3	0.641612	1492.64	1492.64	(Lac-AEJA)2-LacAEJ |3	90949
67	0.858845	0.898766	67	0.990052	3	2	3	0.880093	1492.64	1492.64	(Lac-AEJA)2-LacAEJ |3	24063
75	0.931138	0.99529	75	0.980166	7	2	3	0.964666	1492.64	1492.64	(Lac-AEJA)2-LacAEJ |3	24208
5645	19.1004	19.1617	5645	0.989307	5	2	3	19.1438	1549.66	1549.66	(Lac-AEJA)2-LacAEJG |3	397398
5577	18.877	19.019	5577	0.950468	16	2	3	18.9366	1549.67	1549.66	(Lac-AEJA)2-LacAEJG |3	1064485
5437	18.3223	18.4756	5437	0.981596	19	2	3	18.4094	1549.66	1549.66	(Lac-AEJA)2-LacAEJG |3	9212474
5528	18.6657	18.8154	5528	0.990195	18	2	3	18.7343	1549.67	1549.66	(Lac-AEJA)2-LacAEJG |3	2238918
5832	19.7985	20.6044	5832	0.995213	121	1;3;2	3	20.1306	1563.68	1563.68	(Lac-AEJA)3 |3	95417608
6062	20.7404	21.0787	6062	0.996308	32	2	3	20.8474	1563.68	1563.68	(Lac-AEJA)3 |3	3999475
6784	23.9734	24.7174	6784	0.988837	146	3;2	5	24.2625	2452.05	2452.05	(Lac-AEJA)3-(Lac-AEJ)2 |5	1988132
6348	21.862	21.914	6348	0.969074	7	2;3	3	21.8794	2007.87	2007.86	(Lac-AEJA)3-Lac-AEJ |4	198621
6439	22.2279	23.1426	6439	0.997001	194	2;3	4	22.4987	2007.87	2007.86	(Lac-AEJA)3-Lac-AEJ |4	13747509
6646	23.1864	23.4176	6646	0.833612	17	2;3	3	23.3012	2007.87	2007.86	(Lac-AEJA)3-Lac-AEJ |4	113386
6284	21.5762	21.6862	6284	0.964333	24	2;3	4	21.6313	2064.9	2064.89	(Lac-AEJA)3-Lac-AEJG |4	289536
6629	23.1426	23.3731	6629	0.976267	51	2;3	3	23.2463	2078.91	2078.9	(Lac-AEJA)4 |4	1439068
6572	22.8137	23.0546	6572	0.977963	53	2;3	3	22.924	2078.91	2078.9	(Lac-AEJA)4 |4	3255475
6703	23.5158	23.65	6703	0.917945	28	2;3	4	23.578	2078.91	2078.9	(Lac-AEJA)4 |4	329447
6955	24.823	25.2484	6955	0.984004	61	3;2	5	24.9486	2523.09	2523.09	(Lac-AEJA)4-Lac-AEJ |5	525128
6905	24.5298	24.7526	6905	0.96991	44	2;3	5	24.6371	2523.09	2523.09	(Lac-AEJA)4-Lac-AEJ |5	1062745
6991	25.0026	25.1766	6991	0.99146	31	3;2	5	25.0853	2594.13	2594.12	(Lac-AEJA)5 |5	367019
7038	25.2665	25.4023	7038	0.985702	17	2;3	5	25.3329	2594.13	2594.12	(Lac-AEJA)5 |5	150262
4646	15.9407	16.1618	4646	0.999738	26	2	3	16.0484	1464.61	1464.61	(Lac-AEJG)2-LacAEJ |3	2054664
4932	16.7609	16.9718	4932	0.997878	24	2	3	16.835	1535.65	1535.65	(Lac-AEJG)2-LacAEJA |3	1342473
6787	23.9823	24.0813	6787	0.92928	6	3	4	24.0326	2022.86	2022.84	(Lac-AEJG)4 |4	75225
2079	8.3888	8.49496	2079	0.952073	6	2	2	8.4441	834.36	834.36	Lac-AEJ-JEA|2	92541
1890	7.93297	8.30843	1890	0.999175	73	2;1	3	8.08326	834.362	834.36	Lac-AEJ-JEA|2	27622682
4113	14.2385	14.7544	4113	0.997146	83	2;1	3	14.3528	834.361	834.36	Lac-AEJ-JEA|2	55014308
2285	8.94551	9.16312	2285	0.998792	37	1;2	3	9.04902	834.362	834.36	Lac-AEJ-JEA|2	7311562
4364	15.0516	15.3993	4364	0.997871	60	2;1	3	15.1534	834.361	834.36	Lac-AEJ-JEA|2	37942896
2403	9.2238	9.89993	2403	0.998756	115	2;1	3	9.42632	834.361	834.36	Lac-AEJ-JEA|2	33767596
2212	8.72534	8.85736	2212	0.99365	10	2	3	8.769	834.362	834.36	Lac-AEJ-JEA|2	912376
4035	13.9796	14.0756	4035	0.996646	13	2;1	3	14.0272	834.361	834.36	Lac-AEJ-JEA|2	1647773
2180	8.6357	8.67079	2180	0.994663	5	2	3	8.65353	834.362	834.36	Lac-AEJ-JEA|2	380823
1585	6.96259	7.0165	1585	0.996105	5	2	2	6.98602	834.359	834.36	Lac-AEJ-JEA|2	125786
1566	6.84863	6.90039	1566	0.983001	4	2	2	6.87667	834.361	834.36	Lac-AEJ-JEA|2	338595
2790	10.3399	10.5806	2790	0.999301	42	2;1	3	10.4641	834.361	834.36	Lac-AEJ-JEA|2	15633401
3787	13.277	13.6332	3787	0.997982	63	2;1	3	13.4988	906.383	906.382	Lac-AEJ-Lac-AEJ |2	19888916
4005	13.839	13.9627	4005	0.815293	5	2	3	13.8965	906.382	906.382	Lac-AEJ-Lac-AEJ |2	255198
3647	12.8256	13.1928	3647	0.999159	82	2;1	2	12.9392	906.382	906.382	Lac-AEJ-Lac-AEJ |2	159913664
5357	17.9806	18.0934	5357	0.992599	12	2;1	2	18.0401	977.42	977.419	Lac-AEJ-Lac-AEJA |2	475877
5927	20.1905	20.2259	5927	0.991121	3	2	2	20.2098	977.422	977.419	Lac-AEJ-Lac-AEJA |2	135093
6788	23.9469	24.0196	6788	0.923472	4	2;1	2	23.993	977.419	977.419	Lac-AEJ-Lac-AEJA |2	63910
5401	18.2336	18.3744	5401	0.999287	19	2;1	3	18.3078	977.421	977.419	Lac-AEJ-Lac-AEJA |2	450042
5744	19.4697	19.5339	5744	0.992063	5	2	2	19.5052	977.422	977.419	Lac-AEJ-Lac-AEJA |2	174395
26	0.543303	1.54157	26	0.99984	159	1;2	3	0.913188	977.423	977.419	Lac-AEJ-Lac-AEJA |2	291359
4725	16.1618	16.2146	4725	0.995996	6	2;1	3	16.1986	977.419	977.419	Lac-AEJ-Lac-AEJA |2	1067412
5716	19.3166	19.4147	5716	0.931873	9	2;1	2	19.3758	977.421	977.419	Lac-AEJ-Lac-AEJA |2	276548
6142	20.963	20.9893	6142	0.97582	3	2	2	20.974	977.421	977.419	Lac-AEJ-Lac-AEJA |2	151951
4043	13.9883	16.1011	4043	0.999072	459	1;2	2	14.6283	977.419	977.419	Lac-AEJ-Lac-AEJA |2	1982081408
4744	16.2813	17.8768	4744	0.998902	257	2;1	3	16.9605	977.42	977.419	Lac-AEJ-Lac-AEJA |2	1094211
5590	18.9033	19.1267	5590	0.993114	20	2;1	3	19.0233	977.422	977.419	Lac-AEJ-Lac-AEJA |2	273746
5492	18.5776	18.8512	5492	0.996049	23	2;1	3	18.6981	977.421	977.419	Lac-AEJ-Lac-AEJA |2	364351
2746	10.2148	10.3592	2746	0.999844	16	1	2	10.2867	533.235	533.233	Lac-AEJA |1	437849
2688	10.1089	10.1348	2688	0.999994	4	1	2	10.1212	533.234	533.233	Lac-AEJA |1	598090
3098	11.3612	11.4046	3098	0.999823	5	1	2	11.3852	533.234	533.233	Lac-AEJA |1	315534
4493	15.4991	15.5407	4493	0.995177	4	1	2	15.5156	533.234	533.233	Lac-AEJA |1	3134196
3196	11.6078	11.9978	3196	0.997693	29	1	2	11.8108	533.235	533.233	Lac-AEJA |1	293395
1050	4.69886	4.90187	1050	0.999978	23	1	2	4.81092	533.234	533.233	Lac-AEJA |1	349925
1187	5.32413	5.57863	1187	0.999916	18	1	2	5.46598	533.234	533.233	Lac-AEJA |1	117862
1274	5.64781	5.69983	1274	0.999257	5	1	2	5.67297	533.234	533.233	Lac-AEJA |1	105860
3407	12.1063	12.141	3407	0.998984	4	1	2	12.12	533.235	533.233	Lac-AEJA |1	199254
3434	12.2128	12.2385	3434	0.955141	3	1	2	12.2267	533.23	533.233	Lac-AEJA |1	168602
5845	19.8845	19.918	5845	0.997856	4	1	2	19.897	533.234	533.233	Lac-AEJA |1	769717
1398	6.01743	6.06072	1398	0.999952	6	1	3	6.04031	533.234	533.233	Lac-AEJA |1	121516
3455	12.2927	12.5421	3455	0.991759	17	1	2	12.3974	533.233	533.233	Lac-AEJA |1	333907
1422	6.11486	6.37004	1422	0.999523	41	2;1	2	6.35187	533.234	533.233	Lac-AEJA |1	2050610944
1481	6.54723	9.97135	1481	0.99974	444	1;2	2	6.67007	533.234	533.233	Lac-AEJA |1	2052152064
3630	12.7369	12.8603	3630	0.999971	9	1	2	12.8057	533.234	533.233	Lac-AEJA |1	214899
2889	10.692	11.0254	2889	0.999315	28	1	2	10.8624	533.234	533.233	Lac-AEJA |1	1805633
6953	24.8685	24.9319	6953	0.88803	7	2	3	24.8913	1922.81	1922.81	Lac-AEJA-(Lac-AEJ)2-Lac-AEJG |4	142173
6055	20.715	20.8443	6055	0.847748	17	3;2	3	20.7539	1922.81	1922.81	Lac-AEJA-(Lac-AEJ)2-Lac-AEJG |4	1262760
5922	20.1994	20.5528	5922	0.980575	79	3;2	3	20.3759	1922.81	1922.81	Lac-AEJA-(Lac-AEJ)2-Lac-AEJG |4	4971680
6131	20.963	21.5587	6131	0.989267	128	2;3	3	21.1597	1865.79	1865.79	Lac-AEJA-(Lac-AEJ)3 |4	30933506
6026	20.5528	20.7744	6026	0.994996	22	2	3	20.6549	1865.8	1865.79	Lac-AEJA-(Lac-AEJ)3 |4	1732322
6600	22.9571	23.3273	6600	0.986561	64	3;2	5	23.0851	2309.98	2309.98	Lac-AEJA-(Lac-AEJ)4 |5	1921573
5320	17.8061	17.8768	5320	0.984741	4	2	3	17.8409	1048.46	1048.46	Lac-AEJA-Lac-AEJA |2	283080
5271	17.7091	17.7532	5271	0.978184	6	2	3	17.7322	1048.46	1048.46	Lac-AEJA-Lac-AEJA |2	302229
3795	13.2856	13.3474	3795	0.981811	8	2	3	13.3158	1048.46	1048.46	Lac-AEJA-Lac-AEJA |2	511704
4663	15.9757	17.1663	4663	0.996655	235	2;1	3	16.2632	1048.46	1048.46	Lac-AEJA-Lac-AEJA |2	495867968
5151	17.343	17.5423	5151	0.996958	18	1;2	3	17.4387	1048.46	1048.46	Lac-AEJA-Lac-AEJA |2	310198
4460	15.3051	15.8616	4460	0.997179	129	2;1	3	15.4991	1048.46	1048.46	Lac-AEJA-Lac-AEJA |2	658230208
5201	17.5054	18.4167	5201	0.997456	118	2;1	3	17.7107	1478.63	1478.63	Lac-AEJA-LacAEJG-LacAEJ |3	53991372
5588	18.9118	19.0896	5588	0.900285	14	2	3	18.98	1478.63	1478.63	Lac-AEJA-LacAEJG-LacAEJ |3	317324
5494	18.5964	18.8154	5494	0.906959	16	2	3	18.6761	1478.63	1478.63	Lac-AEJA-LacAEJG-LacAEJ |3	381841
4834	16.4875	16.5829	4834	0.98616	13	2;1	3	16.5357	1119.5	1119.49	Lac-AEJAA-Lac-AEJA |2	687690
5009	16.9807	17.0788	5009	0.997488	11	2	3	17.0305	1119.5	1119.49	Lac-AEJAA-Lac-AEJA |2	821281
4740	16.2895	16.4006	4740	0.996054	16	2;1	3	16.3344	1119.49	1119.49	Lac-AEJAA-Lac-AEJA |2	4301352
2761	10.2497	10.3767	2761	0.999305	13	1;2	2	10.3088	604.272	604.27	Lac-AEJAA|1	655393
2830	10.5007	10.7438	2830	0.999964	28	1	2	10.6546	604.271	604.27	Lac-AEJAA|1	8110127
2237	8.80539	9.33642	2237	0.999987	75	1;2	2	9.11224	604.271	604.27	Lac-AEJAA|1	10348674
3017	11.1066	11.1239	3017	0.995823	3	1	2	11.1165	604.271	604.27	Lac-AEJAA|1	123154
5985	20.4299	21.2993	5985	0.998776	125	1;2	2	20.6874	609.265	609.269	Lac-AEJF |1	611486208
6409	22.1031	22.3611	6409	0.999748	42	1;2	2	22.2428	609.265	609.269	Lac-AEJF |1	7149646
6229	21.3522	21.622	6229	0.999239	19	1	2	21.4614	609.265	609.269	Lac-AEJF |1	236916
7065	25.3859	27.062	7065	0.997529	376	1;2	3	25.6332	1053.45	1053.45	Lac-AEJF-Lac-AEJ |2	221480896
7387	27.15	27.3119	7387	0.971903	25	2;1	3	27.2325	1053.45	1053.45	Lac-AEJF-Lac-AEJ |2	86998
7434	27.4564	27.7238	7434	0.980042	15	2;1	3	27.5691	1053.45	1053.45	Lac-AEJF-Lac-AEJ |2	90657
7542	27.9994	28.0523	7542	0.899857	4	2;1	3	28.02	1053.45	1053.45	Lac-AEJF-Lac-AEJ |2	34935
7557	28.0946	28.1228	7557	0.995969	4	2;1	3	28.1056	1053.45	1053.45	Lac-AEJF-Lac-AEJ |2	31758
7589	28.24	28.5197	7589	0.992702	55	2;1	3	28.3446	1124.49	1124.49	Lac-AEJF-Lac-AEJA |2	2486805
7223	26.287	27.109	7223	0.998258	130	1;2	3	26.4404	1124.49	1124.49	Lac-AEJF-Lac-AEJA |2	46381812
7187	26.0019	26.1609	7187	0.998178	30	1;2	3	26.0891	1124.49	1124.49	Lac-AEJF-Lac-AEJA |2	685190
7072	25.4398	25.7099	7072	0.984744	43	2;1	3	25.5512	1124.49	1124.49	Lac-AEJF-Lac-AEJA |2	5708719
7488	27.7401	27.9003	7488	0.967751	19	1;2	3	27.8151	1124.49	1124.49	Lac-AEJF-Lac-AEJA |2	168599
7394	27.1875	27.6804	7394	0.996652	99	2;1	3	27.3936	1124.49	1124.49	Lac-AEJF-Lac-AEJA |2	3909694
7685	28.7807	28.9434	7685	0.984256	33	2;1	3	28.8479	1124.49	1124.49	Lac-AEJF-Lac-AEJA |2	518275
7554	28.0523	28.1021	7554	0.851036	4	2	3	28.0704	1124.49	1124.49	Lac-AEJF-Lac-AEJA |2	65791
2172	8.62704	8.71664	2172	0.98636	9	1	2	8.67078	519.219	519.218	Lac-AEJG |1	239837
1573	6.91775	6.97986	1573	0.999992	5	1	2	6.93779	519.219	519.218	Lac-AEJG |1	1755721
1759	7.48624	7.59264	1759	0.998946	5	1	2	7.51343	519.22	519.218	Lac-AEJG |1	380130
1357	5.91998	6.27548	1357	0.999979	38	1	2	6.06161	519.219	519.218	Lac-AEJG |1	1815529
1194	5.36035	5.7604	1194	0.999888	34	1	2	5.5141	519.219	519.218	Lac-AEJG |1	1811308
1116	5.02994	5.134	1116	0.999794	8	1	2	5.06664	519.219	519.218	Lac-AEJG |1	1775977
1809	7.64691	7.67291	1809	0.999794	4	1	2	7.66161	519.219	519.218	Lac-AEJG |1	1031314
2283	8.90065	9.00655	2283	0.999959	10	1	2	8.9617	519.218	519.218	Lac-AEJG |1	245232
2374	9.15442	9.27577	2374	0.999977	9	1	2	9.19993	519.219	519.218	Lac-AEJG |1	343220
733	3.81227	4.97869	733	0.999911	173	1;2	2	4.03202	519.218	519.218	Lac-AEJG |1	597401984
2566	9.72132	9.80197	2566	0.98943	4	1	2	9.75481	519.219	519.218	Lac-AEJG |1	78160
3373	12.0977	12.1324	3373	0.964322	3	2	2	12.1118	963.408	963.403	Lac-AEJG-Lac-AEJ |2	87516
356	2.58717	2.63229	356	0.850439	3	2	4	2.61185	963.405	963.403	Lac-AEJG-Lac-AEJ |2	72192
3552	12.5158	14.1443	3552	0.99973	278	2;1	2	12.7704	963.403	963.403	Lac-AEJG-Lac-AEJ |2	497055680
2902	10.796	10.8493	2902	0.98428	5	2	2	10.8273	963.403	963.403	Lac-AEJG-Lac-AEJ |2	191464
3495	12.3981	12.5682	3495	0.99685	22	2;1	3	12.4629	1034.44	1034.44	Lac-AEJG-Lac-AEJA |2	882489
4108	14.2301	14.834	4108	0.997183	93	2;1	2	14.371	1034.44	1034.44	Lac-AEJG-Lac-AEJA |2	15858793
4456	15.2964	15.3828	4456	0.979066	9	2	3	15.3536	1034.44	1034.44	Lac-AEJG-Lac-AEJA |2	534004
3925	13.6419	14.0058	3925	0.999722	83	2;1	3	13.7683	1034.44	1034.44	Lac-AEJG-Lac-AEJA |2	115570256
634	3.43548	3.85554	634	0.997975	74	2;1	3	3.5649	599.255	599.26	Lac-AEJH |1	13463801
577	3.13467	3.30644	577	0.994128	33	1;2	3	3.21017	599.255	599.26	Lac-AEJH |1	4145687
3303	11.8811	12.0431	3303	0.997791	15	2	3	11.9657	1043.44	1043.45	Lac-AEJH-Lac-AEJ |2	1341337
3043	11.228	11.4133	3043	0.999251	22	2	3	11.306	1043.44	1043.45	Lac-AEJH-Lac-AEJ |2	7333556
3147	11.5023	11.6964	3147	0.998916	23	2	3	11.6069	1043.44	1043.45	Lac-AEJH-Lac-AEJ |2	14720809
3437	12.2472	12.6443	3437	0.992693	40	2	3	12.4887	1114.48	1114.48	Lac-AEJH-Lac-AEJA |2	4751925
3721	13.0985	13.1154	3721	0.926887	3	2	3	13.1065	1114.48	1114.48	Lac-AEJH-Lac-AEJA |2	744702
463	2.8586	3.2122	463	0.999171	81	1;2	3	2.99183	590.291	590.296	Lac-AEJK |1	9385382
3849	13.4082	13.4453	3849	0.989624	4	1	2	13.4245	590.292	590.296	Lac-AEJK |1	136160
3245	11.7312	11.9889	3245	0.999073	26	2	3	11.8423	1034.48	1034.48	Lac-AEJK-Lac-AEJ |2	6129272
3033	11.1761	11.485	3033	0.998414	43	2;1	3	11.2813	1034.48	1034.48	Lac-AEJK-Lac-AEJ |2	35476164
3429	12.2212	12.4702	3429	0.999144	30	2;1	3	12.3242	1105.52	1105.52	Lac-AEJK-Lac-AEJA |2	9420471
3965	13.7958	13.9019	3965	0.997034	13	2	3	13.8433	1105.52	1105.52	Lac-AEJK-Lac-AEJA |2	907732
3694	12.9719	13.0646	3694	0.998631	11	2	3	13.02	1105.51	1105.52	Lac-AEJK-Lac-AEJA |2	1655341
3792	13.2941	13.4365	3792	0.99477	17	2	3	13.362	1105.52	1105.52	Lac-AEJK-Lac-AEJA |2	2668233
6663	23.3273	23.6058	6663	0.988401	18	2	3	23.445	1108.46	1108.46	Lac-AEJM-Lac-AEJA |2	198952
746	3.79497	4.22968	746	0.999308	93	2;1	3	3.95667	618.297	618.301	Lac-AEJR |1	29085650
899	4.36205	4.73348	899	0.998833	98	1;2	3	4.50409	618.298	618.301	Lac-AEJR |1	11829052
3387	12.0977	12.5051	3387	0.996847	50	2;1	3	12.2458	1062.48	1062.49	Lac-AEJR-Lac-AEJ |2	35799600
3572	12.6611	12.8773	3572	0.998711	43	1;2	3	12.7397	1062.48	1062.49	Lac-AEJR-Lac-AEJ |2	6082084
3964	13.7958	13.9193	3964	0.977651	14	2	3	13.8439	1133.52	1133.52	Lac-AEJR-Lac-AEJA |2	1348034
3727	13.1154	13.5145	3727	0.998272	43	2	3	13.2312	1133.52	1133.52	Lac-AEJR-Lac-AEJA |2	10521883
1121	5.06408	5.54399	1121	0.997214	55	1;2	2	5.2772	549.229	549.233	Lac-AEJS |1	2132925
472	2.84999	2.93616	472	0.97553	6	2	2	2.88201	549.237	549.233	Lac-AEJS |1	209086
1327	5.78844	6.09759	1327	0.998066	46	1;2	2	5.92689	549.23	549.233	Lac-AEJS |1	1696216
640	3.43548	3.54006	640	0.99911	13	1	2	3.48753	549.229	549.233	Lac-AEJS |1	8504567
781	3.89038	3.90799	781	0.98409	3	1	2	3.90216	549.23	549.233	Lac-AEJS |1	172552
1048	4.70752	4.83955	1048	0.996832	17	1;2	2	4.75624	549.23	549.233	Lac-AEJS |1	1117026
1000	4.53003	4.64453	1000	0.999732	13	1	2	4.59706	549.23	549.233	Lac-AEJS |1	171250
4261	14.7027	14.8934	4261	0.965557	24	2;1	3	14.7894	993.415	993.419	Lac-AEJS-Lac-AEJ |2	737999
3364	12.0344	12.6018	3364	0.995683	98	2;1	3	12.2281	993.415	993.419	Lac-AEJS-Lac-AEJ |2	15302675
3886	13.5474	14.2042	3886	0.991736	117	2;1	3	13.8529	993.416	993.419	Lac-AEJS-Lac-AEJ |2	1868629
4328	14.9457	15.0171	4328	0.98561	7	1;2	2	14.9826	993.415	993.419	Lac-AEJS-Lac-AEJ |2	344366
3777	13.2598	13.4365	3777	0.992486	27	1;2	3	13.3455	993.416	993.419	Lac-AEJS-Lac-AEJ |2	791562
3575	12.686	12.8944	3575	0.98822	40	1;2	3	12.786	993.415	993.419	Lac-AEJS-Lac-AEJ |2	3326084
4570	15.7042	15.7479	4570	0.864434	3	2	3	15.7241	1064.45	1064.46	Lac-AEJS-Lac-AEJA |2	286004
3772	13.2516	13.4627	3772	0.983378	42	1;2	3	13.3242	1064.45	1064.46	Lac-AEJS-Lac-AEJA |2	3915985
4611	15.8269	15.9581	4611	0.892125	10	2	3	15.8929	1064.45	1064.46	Lac-AEJS-Lac-AEJA |2	238786
4287	14.7817	14.8075	4287	0.874501	3	2	3	14.7976	1064.45	1064.46	Lac-AEJS-Lac-AEJA |2	238557
4312	14.8593	15.068	4312	0.936867	12	2	3	14.973	1064.45	1064.46	Lac-AEJS-Lac-AEJA |2	401799
4001	13.8846	14.0928	4001	0.988164	27	2;1	3	13.9533	1064.45	1064.46	Lac-AEJS-Lac-AEJA |2	1168366
3822	13.3733	14.0588	3822	0.99999	99	1;2	2	13.5323	561.265	561.269	Lac-AEJV |1	233218528
3311	11.8985	12.0431	3311	0.999695	18	1	2	11.9706	561.266	561.269	Lac-AEJV |1	842541
6047	20.6895	20.8725	6047	0.998088	41	1;2	3	20.7492	1005.45	1005.45	Lac-AEJV-Lac-AEJ |2	6300586
5909	20.1374	20.2814	5909	0.99993	31	1;2	3	20.222	1005.45	1005.45	Lac-AEJV-Lac-AEJ |2	792206
5827	19.7811	20.0829	5827	0.999143	61	2;1	3	19.8967	1005.45	1005.45	Lac-AEJV-Lac-AEJ |2	40149536
6107	20.8725	21.07	6107	0.996488	39	1;2	3	20.9765	1076.49	1076.49	Lac-AEJV-Lac-AEJA |2	7065083
6001	20.4473	20.5089	6001	0.985942	4	2	3	20.4733	1076.49	1076.49	Lac-AEJV-Lac-AEJA |2	233457
6335	21.8167	21.9427	6335	0.983789	22	2;1	3	21.8738	1076.49	1076.49	Lac-AEJV-Lac-AEJA |2	881569
5428	18.2789	18.3136	5428	0.989165	4	2	3	18.296	1076.49	1076.49	Lac-AEJV-Lac-AEJA |2	243734
4420	15.2964	15.7129	4420	0.999344	69	1;2	2	15.4359	625.26	625.261	Lac-AEJY |1	184742704
4750	16.3147	16.4093	4750	0.996046	11	1	2	16.3583	625.261	625.261	Lac-AEJY |1	1431443
5386	18.1296	18.2336	5386	0.906194	7	1	2	18.1809	625.26	625.261	Lac-AEJY |1	1079370
6161	21.1134	21.1846	6161	0.995068	10	1;2	3	21.1526	1069.45	1069.45	Lac-AEJY-Lac-AEJ |2	362924
6560	22.7698	22.8842	6560	0.972901	22	2;1	3	22.8188	1069.45	1069.45	Lac-AEJY-Lac-AEJ |2	351519
6989	24.9848	25.223	6989	0.978274	25	2;1	3	25.0868	1069.45	1069.45	Lac-AEJY-Lac-AEJ |2	113602
6057	20.7317	20.9253	6057	0.999627	40	1;2	3	20.8028	1069.45	1069.45	Lac-AEJY-Lac-AEJ |2	5822893
5930	20.2083	20.6213	5930	0.996755	75	1;2	3	20.3327	1069.45	1069.45	Lac-AEJY-Lac-AEJ |2	48121608
6332	21.7732	22.1031	6332	0.997706	32	2;1	3	21.8634	1140.48	1140.48	Lac-AEJY-Lac-AEJA |2	1008286
6116	20.9078	21.7036	6116	0.999031	140	2;1	3	21.2017	1140.48	1140.48	Lac-AEJY-Lac-AEJA |2	11717962
1310	5.75175	5.81436	1310	0.998665	6	2	2	5.78984	590.256	590.255	Lac-AEJ[AG]|1	156555
1733	7.4429	8.21271	1733	0.999474	88	1;2	2	7.8367	590.256	590.255	Lac-AEJ[AG]|1	2334053
1353	5.86807	6.08686	1353	0.996908	29	1;2	2	5.93869	590.256	590.255	Lac-AEJ[AG]|1	581441
2154	8.59234	8.7967	2154	0.999933	29	1;2	2	8.70562	590.256	590.255	Lac-AEJ[AG]|1	3353893
4366	15.0429	15.0765	4366	0.98867	5	1	2	15.064	632.302	632.306	Lac-AEJ[AV]|1	778318
2565	9.71266	9.77596	2565	0.998602	5	1	2	9.74572	632.303	632.306	Lac-AEJ[AV]|1	80085
4427	15.279	15.3828	4427	0.999952	13	1	2	15.3308	632.303	632.306	Lac-AEJ[AV]|1	911260
2488	9.53014	9.59016	2488	0.99857	5	2	3	9.55733	1020.42	1020.42	Lac-AEJ[GG]-Lac-AEJ |2	172595
3211	11.6685	11.9889	3211	0.997879	64	2;1	3	11.777	1020.43	1020.42	Lac-AEJ[GG]-Lac-AEJ |2	11705033
3378	12.0977	12.3894	3378	0.980243	29	2;1	3	12.2516	1020.43	1020.42	Lac-AEJ[GG]-Lac-AEJ |2	1189109
3577	12.7285	12.8944	3577	0.9946	31	1;2	3	12.8018	1091.46	1091.46	Lac-AEJ[GG]-Lac-AEJA |2	3576555
576	3.14334	3.40012	576	0.999074	48	1;2	2	3.2481	576.24	576.239	Lac-AEJ[GG]|1	7542151
5307	17.7971	18.3572	5307	0.999977	114	2;1	2	18.1147	575.281	575.285	Lac-AEJ[L/I] |1	300413664
6035	20.5787	20.6213	6035	0.998417	3	1	2	20.5957	575.281	575.285	Lac-AEJ[L/I] |1	953453
6960	24.886	25.0576	6960	0.997069	31	1;2	3	24.9537	1019.47	1019.47	Lac-AEJ[L/I]-Lac-AEJ |2	442114
6885	24.4308	24.8319	6885	0.997247	86	1;2	3	24.6346	1019.47	1019.47	Lac-AEJ[L/I]-Lac-AEJ |2	4050965
6729	23.6147	24.3688	6729	0.999076	153	2;1	3	23.7827	1019.47	1019.47	Lac-AEJ[L/I]-Lac-AEJ |2	115109248
7092	25.6042	26.1344	7092	0.989086	88	2;1	3	25.8331	1090.5	1090.51	Lac-AEJ[L/I]-Lac-AEJA |2	792152
7016	25.125	25.3859	7016	0.989769	40	2;1	3	25.2778	1090.5	1090.51	Lac-AEJ[L/I]-Lac-AEJA |2	591848
6923	24.6468	25.0754	6923	0.997229	89	2;1	3	24.8161	1090.5	1090.51	Lac-AEJ[L/I]-Lac-AEJA |2	23723750
6859	24.2717	24.4308	6859	0.994334	32	1;2	3	24.3438	1090.51	1090.51	Lac-AEJ[L/I]-Lac-AEJA |2	651212
3109	11.3873	11.4327	3109	0.756923	5	2	4	11.4075	1090.5	1090.51	Lac-AEJ[L/I]-Lac-AEJA |2	181969
7278	26.5427	26.6218	7278	0.903957	12	2	3	26.58	1090.51	1090.51	Lac-AEJ[L/I]-Lac-AEJA |2	72638
6652	23.2391	23.3273	6652	0.992673	20	1;2	3	23.2844	1090.51	1090.51	Lac-AEJ[L/I]-Lac-AEJA |2	346303
1082	4.77016	4.87629	1082	0.998822	4	1	2	4.83674	462.197	462.196	Lac-AEJ|1	166528
1113	4.97869	5.0384	1113	0.999565	3	1	2	5.00207	462.197	462.196	Lac-AEJ|1	782159
603	3.25488	3.82116	603	0.999758	67	1	2	3.39419	462.196	462.196	Lac-AEJ|1	190451824

## Sheet: R20291.3
ID	xicStart	xicEnd	feature	corrMax	ionCount	chargeOrder	maxIsotopeCount	rt	mwMonoisotopic	theo_mwMonoisotopic	inferredStructure	maxIntensity		Structure	Intensity	RT	Abundance	Oligomerisation state
6609	23.889	24.2388	6609	0.886379	15	2	3	24.0393	1421.6	1421.6	(Lac-AEJ)2-Lac-AEJA |3	97437		Lac-AEJA |1	4079183771	6.63736	0.355434	1
6294	22.2815	22.3168	6294	0.993739	3	2	3	22.2962	1421.6	1421.6	(Lac-AEJ)2-Lac-AEJA |3	103389		Lac-AEJF |1	631360299	20.6937	0.0550128	1
6309	22.3713	22.3885	6309	0.976516	3	2	3	22.3795	1421.6	1421.6	(Lac-AEJ)2-Lac-AEJA |3	124306		Lac-AEJG |1	569576476	4.04588	0.0496293	1
6324	22.4499	22.5474	6324	0.997254	11	2	3	22.5013	1421.6	1421.6	(Lac-AEJ)2-Lac-AEJA |3	278660		Lac-AEJV |1	272071358	13.5447	0.0237066	1
6377	22.6897	23.0032	6377	0.994721	20	2	3	22.8291	1421.6	1421.6	(Lac-AEJ)2-Lac-AEJA |3	164561		Lac-AEJ[L/I] |1	267404402	18.1292	0.0232999	1
6024	21.24	21.7213	6024	0.938885	37	2	3	21.4675	1421.6	1421.6	(Lac-AEJ)2-Lac-AEJA |3	216129		Lac-AEJY |1	185421016	15.4474	0.0161564	1
6453	23.0565	23.3687	6453	0.948135	26	2	3	23.173	1421.6	1421.6	(Lac-AEJ)2-Lac-AEJA |3	236004		Lac-AEJ|1	184513104	3.40352	0.0160773	1
5970	21.0468	21.1077	5970	0.965411	5	2	3	21.0757	1421.61	1421.6	(Lac-AEJ)2-Lac-AEJA |3	214643		Lac-AEJR |1	32802603	3.9816	0.00285821	1
5897	20.7873	20.9201	5897	0.985366	12	2	3	20.8571	1421.61	1421.6	(Lac-AEJ)2-Lac-AEJA |3	274723		Lac-AEJAA|1	17294684	9.17796	0.00150695	1
5837	20.4583	20.5287	5837	0.992023	5	2	3	20.4982	1421.61	1421.6	(Lac-AEJ)2-Lac-AEJA |3	332481		Lac-AEJH |1	15058241	3.58283	0.00131208	1
5508	19.2439	19.7402	5508	0.940175	44	2	3	19.4549	1421.6	1421.6	(Lac-AEJ)2-Lac-AEJA |3	989980		Lac-AEJS |1	13317352	3.49626	0.00116039	1
6192	21.8818	22.1746	6192	0.979436	21	2	3	22.031	1421.61	1421.6	(Lac-AEJ)2-Lac-AEJA |3	122023		Lac-AEJK |1	8898515	2.99935	0.000775361	1
5195	17.8966	18.0174	5195	0.997576	17	1;2	3	17.9533	1421.61	1421.6	(Lac-AEJ)2-Lac-AEJA |3	13698912		Lac-AEJ[GG]|1	7039708	3.25259	0.000613396	1
79	1.52546	1.54951	79	0.986788	3	2	3	1.53605	1421.61	1421.6	(Lac-AEJ)2-Lac-AEJA |3	18129		Lac-AEJ[AG]|1	5608865	8.80281	0.000488721	1
6845	25.1379	25.1729	6845	0.98732	3	2	3	25.1539	1421.61	1421.6	(Lac-AEJ)2-Lac-AEJA |3	71220		Lac-AEJ[AV]|1	1109517	15.3387	9.66763e-05	1
5252	18.2268	19.167	5252	0.999001	133	2;1	3	18.4907	1421.6	1421.6	(Lac-AEJ)2-Lac-AEJA |3	497093760		Lac-AEJ-Lac-AEJA |2	1643508935	14.6452	0.143205	2
60	1.39795	1.44686	60	0.991035	4	2	3	1.4257	1421.6	1421.6	(Lac-AEJ)2-Lac-AEJA |3	21855		Lac-AEJA-Lac-AEJA |2	890525514	15.4986	0.0775948	2
6524	23.3863	23.4679	6524	0.882875	9	2	3	23.4367	1407.58	1407.59	(Lac-AEJ)2-Lac-AEJG |3	212414		Lac-AEJG-Lac-AEJ |2	466654547	12.6573	0.0406613	2
6214	21.9746	22.0758	6214	0.998558	12	2	3	22.0189	1407.58	1407.59	(Lac-AEJ)2-Lac-AEJG |3	187681		Lac-AEJF-Lac-AEJ |2	177446979	25.6422	0.0154616	2
6148	21.7475	21.8818	6148	0.980133	14	2	3	21.7978	1407.58	1407.59	(Lac-AEJ)2-Lac-AEJG |3	567878		Lac-AEJ-JEA|2	169223508	14.3618	0.0147451	2
6314	22.38	22.5385	6314	0.990804	19	2	3	22.4529	1407.58	1407.59	(Lac-AEJ)2-Lac-AEJG |3	400830		Lac-AEJ-Lac-AEJ |2	144341280	12.9454	0.012577	2
6696	24.3379	24.3838	6696	0.958957	4	2	3	24.3552	1407.58	1407.59	(Lac-AEJ)2-Lac-AEJG |3	96080		Lac-AEJG-Lac-AEJA |2	103350566	13.7653	0.00900532	2
4740	16.6804	17.5042	4740	0.998546	107	2;1	3	16.845	1407.59	1407.59	(Lac-AEJ)2-Lac-AEJG |3	86112040		Lac-AEJ[L/I]-Lac-AEJ |2	102721358	23.7716	0.00895049	2
4891	17.0241	17.7084	4891	0.992496	79	2;1	3	17.173	1350.57	1350.57	(Lac-AEJ)3 |3	22682094		Lac-AEJY-Lac-AEJ |2	49545273	20.3275	0.00431706	2
6684	24.2475	24.428	6684	0.954961	20	2	3	24.3448	1851.77	1851.77	(Lac-AEJ)3-Lac-AEJG |4	269329		Lac-AEJV-Lac-AEJ |2	46693980	19.8796	0.00406862	2
5610	19.5224	19.8294	5610	0.992901	56	2;3	3	19.6983	1851.78	1851.77	(Lac-AEJ)3-Lac-AEJG |4	3260647		Lac-AEJF-Lac-AEJA |2	43870473	26.4508	0.0038226	2
7090	26.5046	26.6454	7090	0.923586	11	2	3	26.5525	1851.76	1851.77	(Lac-AEJ)3-Lac-AEJG |4	136414		Lac-AEJR-Lac-AEJ |2	31214036	12.2719	0.00271979	2
6867	25.1997	25.2337	6867	0.852629	3	2	3	25.2217	1851.77	1851.77	(Lac-AEJ)3-Lac-AEJG |4	74979		Lac-AEJK-Lac-AEJ |2	29786677	11.3327	0.00259542	2
5702	19.9063	20.0826	5702	0.989797	21	2	3	19.9921	1794.75	1794.75	(Lac-AEJ)4 |4	1611896		Lac-AEJ[L/I]-Lac-AEJA |2	22680164	24.8107	0.00197621	2
6096	21.5617	22.5295	6096	0.995524	208	3;2	3	21.8554	1936.83	1936.83	(Lac-AEJA)2-(Lac-AEJ)2 |4	23448434		Lac-AEJS-Lac-AEJ |2	18280156	12.255	0.00159282	2
6021	21.2574	21.3488	6021	0.914189	17	2;3	3	21.2921	1936.83	1936.83	(Lac-AEJA)2-(Lac-AEJ)2 |4	517634		Lac-AEJH-Lac-AEJ |2	13821550	11.6518	0.00120432	2
6427	22.8396	22.8856	6427	0.993297	3	2	3	22.862	1936.82	1936.83	(Lac-AEJA)2-(Lac-AEJ)2 |4	87348		Lac-AEJY-Lac-AEJA |2	11766502	21.1797	0.00102526	2
6530	23.4218	24.1148	6530	0.985134	117	2;3	5	23.6819	2381.01	2381.01	(Lac-AEJA)2-(Lac-AEJ)3 |5	2272531		Lac-AEJR-Lac-AEJA |2	11338016	13.1812	0.000987923	2
6641	24.0682	24.1148	6641	0.903339	6	3;2	3	24.0943	2050.86	2050.87	(Lac-AEJA)2-(Lac-AEJG)2 |4	82554		Lac-AEJK-Lac-AEJA |2	10684121	12.3475	0.000930947	2
6015	21.2487	21.4737	6015	0.886439	37	2;3	3	21.329	1993.85	1993.85	(Lac-AEJA)2-Lac-AEJ-Lac-AEJG |4	370280		Lac-AEJ[GG]-Lac-AEJ |2	9569063	11.816	0.000833788	2
5927	20.8848	21.1164	5927	0.93646	51	2;3	3	21.0058	1993.85	1993.85	(Lac-AEJA)2-Lac-AEJ-Lac-AEJG |4	1076194		Lac-AEJAA-Lac-AEJA |2	6875058	16.3287	0.000599049	2
5348	18.61	18.7232	5348	0.993671	14	2	3	18.6733	1492.64	1492.64	(Lac-AEJA)2-LacAEJ |3	2908267		Lac-AEJV-Lac-AEJA |2	6667830	20.9717	0.000580993	2
5449	18.9604	20.6242	5449	0.997324	217	1;2	3	19.3339	1492.64	1492.64	(Lac-AEJA)2-LacAEJ |3	323013792		Lac-AEJS-Lac-AEJA |2	5996368	13.3211	0.000522486	2
5919	20.8047	20.9201	5919	0.946927	9	2	3	20.8571	1492.64	1492.64	(Lac-AEJA)2-LacAEJ |3	226947		Lac-AEJH-Lac-AEJA |2	4880971	12.6166	0.000425297	2
6074	21.3839	21.4193	6074	0.968046	3	2	3	21.4003	1492.64	1492.64	(Lac-AEJA)2-LacAEJ |3	87951		Lac-AEJ[GG]-Lac-AEJA |2	2543600	12.8116	0.000221633	2
6121	21.6581	21.7213	6121	0.901163	4	2	3	21.6976	1492.65	1492.64	(Lac-AEJA)2-LacAEJ |3	159692		Lac-AEJM-Lac-AEJA |2	350738	23.4593	3.05611e-05	2
6189	21.8731	21.9999	6189	0.903874	11	2	3	21.9428	1492.65	1492.64	(Lac-AEJA)2-LacAEJ |3	112902		(Lac-AEJ)2-Lac-AEJA |3	514058212	18.4907	0.0447918	3
6596	23.8979	23.9428	6596	0.990928	3	2	3	23.9176	1492.64	1492.64	(Lac-AEJA)2-LacAEJ |3	86060		(Lac-AEJA)2-LacAEJ |3	326744557	19.3339	0.0284705	3
6238	22.052	22.131	6238	0.751983	7	2	3	22.0914	1492.64	1492.64	(Lac-AEJA)2-LacAEJ |3	148946		(Lac-AEJ)2-Lac-AEJG |3	87576923	16.845	0.0076309	3
5287	18.3229	18.4967	5287	0.978851	21	2	3	18.4258	1549.66	1549.66	(Lac-AEJA)2-LacAEJG |3	8903334		(Lac-AEJA)3 |3	77526425	20.1003	0.00675516	3
5376	18.6534	19.0153	5376	0.988498	37	2	3	18.793	1549.66	1549.66	(Lac-AEJA)2-LacAEJG |3	1997162		Lac-AEJA-LacAEJG-LacAEJ |3	39531854	17.7202	0.00344456	3
5893	20.7616	21.0105	5893	0.993982	26	2	3	20.8418	1563.68	1563.68	(Lac-AEJA)3 |3	2845057		(Lac-AEJ)3 |3	22682094	17.173	0.00197637	3
5675	19.777	20.6154	5675	0.99459	119	2;1;3	3	20.1003	1563.68	1563.68	(Lac-AEJA)3 |3	74681368		(Lac-AEJA)2-LacAEJG |3	10900496	18.4258	0.000949801	3
6622	23.9515	24.6341	6622	0.99376	128	3;2	5	24.2327	2452.05	2452.05	(Lac-AEJA)3-(Lac-AEJ)2 |5	1609844		(Lac-AEJG)2-LacAEJ |3	1635923	16.0391	0.000142544	3
6284	22.2294	23.1115	6284	0.990357	185	2;3	3	22.5035	2007.87	2007.86	(Lac-AEJA)3-Lac-AEJ |4	9579321		(Lac-AEJG)2-LacAEJA |3	918403	16.8336	8.00239e-05	3
6183	21.8644	21.8992	6183	0.993791	6	2;3	3	21.8821	2007.87	2007.86	(Lac-AEJA)3-Lac-AEJ |4	134069		(Lac-AEJA)2-(Lac-AEJ)2 |4	24053416	21.8554	0.00209586	4
6954	25.6997	25.7805	6954	0.821669	9	3;2	3	25.7276	2064.87	2064.89	(Lac-AEJA)3-Lac-AEJG |4	91084		Lac-AEJA-(Lac-AEJ)3 |4	22517425	21.1525	0.00196203	4
6101	21.5793	21.6759	6101	0.962742	22	2;3	3	21.6228	2064.89	2064.89	(Lac-AEJA)3-Lac-AEJG |4	323038		(Lac-AEJA)3-Lac-AEJ |4	9713390	22.5035	0.000846364	4
6408	22.8128	23.0654	6408	0.991871	54	2;3	4	22.9308	2078.9	2078.9	(Lac-AEJA)4 |4	3092220		(Lac-AEJA)4 |4	4719041	22.9308	0.000411188	4
6474	23.1556	23.3776	6474	0.953692	48	2;3	3	23.2504	2078.91	2078.9	(Lac-AEJA)4 |4	1402338		Lac-AEJA-(Lac-AEJ)2-Lac-AEJG |4	4196090	20.3652	0.000365621	4
6544	23.5116	23.6104	6544	0.894599	21	2;3	3	23.56	2078.91	2078.9	(Lac-AEJA)4 |4	224483		(Lac-AEJ)3-Lac-AEJG |4	3741369	19.6983	0.000325999	4
6738	24.5179	24.7207	6738	0.963285	38	3;2	5	24.628	2523.09	2523.09	(Lac-AEJA)4-Lac-AEJ |5	1002675		(Lac-AEJ)4 |4	1611896	19.9921	0.00014045	4
6776	24.8155	25.0215	6776	0.992547	39	3;2	5	24.9082	2523.09	2523.09	(Lac-AEJA)4-Lac-AEJ |5	453868		(Lac-AEJA)2-Lac-AEJ-Lac-AEJG |4	1446474	21.0058	0.000126037	4
6849	25.1027	25.2086	6849	0.923534	9	3	5	25.1716	2523.09	2523.09	(Lac-AEJA)4-Lac-AEJ |5	121471		(Lac-AEJA)3-Lac-AEJG |4	414122	21.6228	3.6084e-05	4
1316	5.97526	6.0815	1316	0.861998	4	6	3	6.03234	2523.1	2523.09	(Lac-AEJA)4-Lac-AEJ |5	62271		(Lac-AEJA)2-(Lac-AEJG)2 |4	82554	24.0943	7.19324e-06	4
6815	25.0018	25.1729	6815	0.925554	30	3;2	5	25.0805	2594.13	2594.12	(Lac-AEJA)5 |5	441534		(Lac-AEJG)4 |4	79970	24.1336	6.96808e-06	4
6880	25.2795	25.3885	6880	0.98286	14	3;2	5	25.3345	2594.13	2594.12	(Lac-AEJA)5 |5	142010		(Lac-AEJA)2-(Lac-AEJ)3 |5	2272531	23.6819	0.000198014	5
4707	16.5367	16.5716	4707	0.911199	3	2	3	16.5525	1464.61	1464.61	(Lac-AEJG)2-LacAEJ |3	174425		(Lac-AEJA)4-Lac-AEJ |5	1640285	24.628	0.000142924	5
4522	15.9446	16.1575	4522	0.996172	24	2	3	16.0391	1464.61	1464.61	(Lac-AEJG)2-LacAEJ |3	1461498		(Lac-AEJA)3-(Lac-AEJ)2 |5	1609844	24.2327	0.000140272	5
4778	16.7503	16.9524	4778	0.967355	27	2	3	16.8336	1535.65	1535.65	(Lac-AEJG)2-LacAEJA |3	918403		Lac-AEJA-(Lac-AEJ)4 |5	1361440	23.0901	0.000118627	5
6655	24.0772	24.1765	6655	0.936872	5	3	3	24.1336	2022.86	2022.84	(Lac-AEJG)4 |4	79970		(Lac-AEJA)5 |5	583544	25.0805	5.08463e-05	5
3910	13.9931	14.0807	3910	0.988475	10	2	3	14.03	834.362	834.36	Lac-AEJ-JEA|2	1307473
3992	14.254	14.6133	3992	0.999542	63	2;1	3	14.3618	834.36	834.36	Lac-AEJ-JEA|2	54840000		Sum intensity	11476615452
4137	14.674	14.7024	4137	0.999667	4	2	3	14.689	834.361	834.36	Lac-AEJ-JEA|2	333518
1595	7.33382	7.55352	1595	0.851835	25	2;1	3	7.42184	834.361	834.36	Lac-AEJ-JEA|2	287289
1504	6.91467	7.03808	1504	0.985689	8	2	2	6.96323	834.361	834.36	Lac-AEJ-JEA|2	310979
2692	10.4078	10.6375	2692	0.998805	41	1;2	3	10.5332	834.361	834.36	Lac-AEJ-JEA|2	16574553
2507	9.9328	9.96761	2507	0.994972	4	2	2	9.9495	834.361	834.36	Lac-AEJ-JEA|2	168613
2288	9.32133	9.85208	2288	0.999502	93	2;1	3	9.51529	834.361	834.36	Lac-AEJ-JEA|2	32250546
2189	9.04887	9.25209	2189	0.997552	36	1;2	3	9.15196	834.361	834.36	Lac-AEJ-JEA|2	5485731
2062	8.66889	8.95108	2062	0.998839	18	2	3	8.83268	834.361	834.36	Lac-AEJ-JEA|2	695121
3557	12.9229	12.9576	3557	0.993815	3	2	2	12.9376	834.36	834.36	Lac-AEJ-JEA|2	777635
1843	8.04722	8.47392	1843	0.999269	71	2;1	3	8.20202	834.361	834.36	Lac-AEJ-JEA|2	19681346
4251	15.0577	15.3301	4251	0.993042	52	2;1	3	15.1567	834.36	834.36	Lac-AEJ-JEA|2	36510704
3719	13.4024	13.6085	3719	0.997757	45	1;2	3	13.4956	906.382	906.382	Lac-AEJ-Lac-AEJ |2	17476200
3523	12.8281	13.1689	3523	0.999458	72	1;2	3	12.9454	906.382	906.382	Lac-AEJ-Lac-AEJ |2	126865080
4658	16.4061	17.7348	4658	0.981577	166	1;2	2	16.984	977.42	977.419	Lac-AEJ-Lac-AEJA |2	722678
3980	14.2284	15.4746	3980	0.999458	275	1;2	2	14.6452	977.419	977.419	Lac-AEJ-Lac-AEJA |2	1613157120
3918	13.9931	14.1497	3918	0.999413	33	2;1	3	14.0405	977.42	977.419	Lac-AEJ-Lac-AEJA |2	25603224
5171	17.816	17.8797	5171	0.992383	4	2	3	17.8457	977.42	977.419	Lac-AEJ-Lac-AEJA |2	350233
5220	18.0261	18.115	5220	0.998704	7	2;1	3	18.0678	977.42	977.419	Lac-AEJ-Lac-AEJA |2	277854
4549	16.0249	16.2008	4549	0.980389	25	1;2	2	16.1026	977.418	977.419	Lac-AEJ-Lac-AEJA |2	868057
32	1.02087	1.2962	32	0.98763	22	2	3	1.15707	977.42	977.419	Lac-AEJ-Lac-AEJA |2	38981
4368	15.5322	15.962	4368	0.976398	96	2;1	2	15.7104	977.42	977.419	Lac-AEJ-Lac-AEJA |2	2440463
8054	34.4629	34.4837	8054	0.975074	3	2	3	34.4754	977.423	977.419	Lac-AEJ-Lac-AEJA |2	15553
71	1.46485	1.55544	71	0.990938	9	2	2	1.50678	977.42	977.419	Lac-AEJ-Lac-AEJA |2	34772
3266	12.1088	12.5862	3266	0.992247	35	1	2	12.3222	533.233	533.233	Lac-AEJA |1	235051
3129	11.7269	12.0191	3129	0.999286	26	1	2	11.8692	533.234	533.233	Lac-AEJA |1	288776
3072	11.6205	11.6728	3072	0.999993	5	1	2	11.6508	533.234	533.233	Lac-AEJA |1	313087
3007	11.4363	11.4536	3007	1	3	1	2	11.4445	533.234	533.233	Lac-AEJA |1	255450
5687	19.8559	19.9063	5687	0.998317	6	1	2	19.8779	533.234	533.233	Lac-AEJA |1	717268
2798	10.8457	11.0654	2798	0.999865	24	1	2	10.9339	533.234	533.233	Lac-AEJA |1	1541846
2768	10.6894	10.7411	2768	0.997999	5	1	2	10.7238	533.235	533.233	Lac-AEJA |1	657330
2570	10.1857	10.4446	2570	0.996875	21	1	2	10.3241	533.234	533.233	Lac-AEJA |1	500405
2351	9.51633	10.0479	2351	0.998981	60	1	2	9.75023	533.234	533.233	Lac-AEJA |1	701272
1411	6.54242	9.13766	1411	0.999699	345	1;2	2	6.63736	533.234	533.233	Lac-AEJA |1	2131666176
1328	6.04686	6.39841	1328	0.999517	51	1;2	2	6.37689	533.233	533.233	Lac-AEJA |1	1941443328
1163	5.48861	5.69382	1163	0.9911	15	1	2	5.5821	533.233	533.233	Lac-AEJA |1	90487
980	4.72148	4.89936	980	0.999702	16	1	2	4.83541	533.234	533.233	Lac-AEJA |1	272019
8053	34.4629	34.4773	8053	0.996756	4	1	2	34.4674	533.238	533.233	Lac-AEJA |1	21058
3847	13.8417	13.8612	3847	0.991967	3	1	2	13.8525	533.233	533.233	Lac-AEJA |1	153363
3499	12.7481	12.8541	3499	0.996217	10	1	2	12.7981	533.233	533.233	Lac-AEJA |1	184091
3717	13.4024	13.4634	3717	0.999467	5	1	2	13.442	533.233	533.233	Lac-AEJA |1	142764
5881	20.7353	20.8221	5881	0.946984	9	2;3	4	20.7644	1922.81	1922.81	Lac-AEJA-(Lac-AEJ)2-Lac-AEJG |4	645058
5777	20.1836	20.5637	5777	0.940822	82	3;2	3	20.3652	1922.81	1922.81	Lac-AEJA-(Lac-AEJ)2-Lac-AEJG |4	3551032
5953	20.9578	21.5531	5953	0.997475	121	2;3	3	21.1525	1865.79	1865.79	Lac-AEJA-(Lac-AEJ)3 |4	21073110
6791	24.8516	25.0018	6791	0.809157	10	2	3	24.9125	1865.77	1865.79	Lac-AEJA-(Lac-AEJ)3 |4	173035
5865	20.5724	20.6672	5865	0.792971	9	2	3	20.6208	1865.79	1865.79	Lac-AEJA-(Lac-AEJ)3 |4	1271280
6441	22.9764	23.2694	6441	0.990796	56	2;3	5	23.0901	2309.98	2309.98	Lac-AEJA-(Lac-AEJ)4 |5	1361440
4933	17.1471	17.3529	4933	0.96839	19	2;1	3	17.2497	1048.46	1048.46	Lac-AEJA-Lac-AEJA |2	304299
4542	15.9794	17.0937	4542	0.997196	182	2;1	3	16.2578	1048.46	1048.46	Lac-AEJA-Lac-AEJA |2	370853504
4304	15.2777	15.856	4304	0.998124	131	1;2	3	15.4986	1048.46	1048.46	Lac-AEJA-Lac-AEJA |2	518932928
3667	13.2881	13.359	3667	0.973997	7	2	3	13.3164	1048.46	1048.46	Lac-AEJA-Lac-AEJA |2	434783
5080	17.515	18.4206	5080	0.997256	115	1;2	3	17.7202	1478.63	1478.63	Lac-AEJA-LacAEJG-LacAEJ |3	39124812
5436	18.8822	18.9428	5436	0.83552	3	2	3	18.9147	1478.63	1478.63	Lac-AEJA-LacAEJG-LacAEJ |3	166092
5369	18.601	18.7948	5369	0.98824	14	2	3	18.6677	1478.63	1478.63	Lac-AEJA-LacAEJG-LacAEJ |3	240950
4696	16.5017	16.5803	4696	0.993085	9	2	3	16.5401	1119.5	1119.49	Lac-AEJAA-Lac-AEJA |2	551609
4607	16.2758	16.4061	4607	0.997297	19	2;1	3	16.3287	1119.49	1119.49	Lac-AEJAA-Lac-AEJA |2	5644505
4876	16.9785	17.085	4876	0.980157	13	2	3	17.0346	1119.5	1119.49	Lac-AEJAA-Lac-AEJA |2	678944
2133	8.8901	9.4384	2133	0.999996	78	1;2	2	9.17796	604.271	604.27	Lac-AEJAA|1	9071029
2747	10.5948	10.8187	2747	0.999857	27	1	2	10.7231	604.27	604.27	Lac-AEJAA|1	7712184
2666	10.3549	10.4624	2666	0.999758	16	1;2	2	10.3879	604.272	604.27	Lac-AEJAA|1	511471
6246	22.1042	22.38	6246	0.9998	43	1;2	2	22.2505	609.265	609.269	Lac-AEJF |1	6142059
5823	20.4323	21.5273	5823	0.998916	138	1;2	2	20.6937	609.264	609.269	Lac-AEJF |1	625218240
6901	25.3972	26.7582	6901	0.999096	287	1;2	3	25.6422	1053.45	1053.45	Lac-AEJF-Lac-AEJ |2	177292800
7158	26.8928	27.1234	7158	0.988741	19	1;2	3	26.9836	1053.45	1053.45	Lac-AEJF-Lac-AEJ |2	154179
7016	26.0273	26.1782	7016	0.990028	27	2;1	3	26.1019	1124.49	1124.49	Lac-AEJF-Lac-AEJA |2	564207
7050	26.3103	26.7406	7050	0.998061	86	1;2	3	26.4508	1124.49	1124.49	Lac-AEJF-Lac-AEJA |2	34061912
7206	27.2369	27.6046	7206	0.996525	82	1;2	3	27.391	1124.49	1124.49	Lac-AEJF-Lac-AEJA |2	2722825
7432	28.7578	28.936	7432	0.999845	31	2;1	3	28.8457	1124.49	1124.49	Lac-AEJF-Lac-AEJA |2	383321
6916	25.4475	25.6908	6916	0.978135	40	2;1	3	25.5538	1124.49	1124.49	Lac-AEJF-Lac-AEJA |2	4488063
7351	28.2602	28.4821	7351	0.996988	46	2;1	3	28.3477	1124.49	1124.49	Lac-AEJF-Lac-AEJA |2	1650145
1013	4.83687	4.94204	1013	0.992874	9	1	2	4.89766	519.218	519.218	Lac-AEJG |1	458788
1069	5.11379	5.14842	1069	0.999094	4	1	2	5.13285	519.218	519.218	Lac-AEJG |1	272110
1296	5.94044	6.26782	1296	0.999768	36	1	2	6.08075	519.219	519.218	Lac-AEJG |1	351674
1135	5.40213	5.71131	1135	0.997903	27	1	2	5.55507	519.219	519.218	Lac-AEJG |1	261729
2013	8.59902	8.62528	2013	0.93036	4	1	2	8.61242	519.218	519.218	Lac-AEJG |1	204376
3813	13.704	13.8074	3813	0.998936	7	1	2	13.7562	519.223	519.218	Lac-AEJG |1	618738
2083	8.74685	8.80978	2083	0.786201	7	1	2	8.77406	519.219	519.218	Lac-AEJG |1	156973
3461	12.6385	12.7565	3461	0.989599	5	1	2	12.6671	519.218	519.218	Lac-AEJG |1	1552309
2157	8.92478	9.10276	2157	0.998171	17	1	2	9.03196	519.219	519.218	Lac-AEJG |1	208804
2295	9.31265	9.35805	2295	0.969762	5	1	2	9.3307	519.218	519.218	Lac-AEJG |1	241567
691	3.82609	4.77596	691	0.999909	151	1;2	2	4.04588	519.218	519.218	Lac-AEJG |1	565249408
3917	13.9669	14.0017	3917	0.990647	4	2	2	13.9868	963.405	963.403	Lac-AEJG-Lac-AEJ |2	223759
3590	13.0931	13.4807	3590	0.99655	85	1;2	3	13.2221	963.404	963.403	Lac-AEJG-Lac-AEJ |2	125195552
2820	10.8362	10.9342	2820	0.999316	9	2	3	10.8883	963.404	963.403	Lac-AEJG-Lac-AEJ |2	233151
3429	12.5339	13.0337	3429	0.997183	100	1;2	3	12.6573	963.403	963.403	Lac-AEJG-Lac-AEJ |2	340738336
3865	13.8522	13.9133	3865	0.977493	7	2	3	13.8832	963.404	963.403	Lac-AEJG-Lac-AEJ |2	263749
3785	13.6255	13.9931	3785	0.99919	72	1;2	3	13.7653	1034.44	1034.44	Lac-AEJG-Lac-AEJA |2	84502136
3366	12.4101	12.5777	3366	0.998778	19	2;1	3	12.4814	1034.44	1034.44	Lac-AEJG-Lac-AEJA |2	634680
3989	14.2369	14.3873	3989	0.998071	31	2;1	3	14.3225	1034.44	1034.44	Lac-AEJG-Lac-AEJA |2	15041209
4346	15.3301	15.3907	4346	0.857772	6	2	3	15.3622	1034.44	1034.44	Lac-AEJG-Lac-AEJA |2	347627
4163	14.7543	14.8147	4163	0.962974	8	2;1	3	14.7834	1034.44	1034.44	Lac-AEJG-Lac-AEJA |2	670097
4050	14.4619	14.7024	4050	0.996282	38	1;2	3	14.6158	1034.44	1034.44	Lac-AEJG-Lac-AEJA |2	2154817
577	3.45955	3.77422	577	0.999417	62	2;1	3	3.58283	599.255	599.26	Lac-AEJH |1	12428557
517	3.13805	3.33954	517	0.996143	31	2;1	3	3.2258	599.255	599.26	Lac-AEJH |1	2629684
2946	11.2868	11.4709	2946	0.996395	20	2	3	11.357	1043.44	1043.45	Lac-AEJH-Lac-AEJ |2	4378624
3205	11.9644	12.0547	3205	0.985861	11	2	3	12.0021	1043.44	1043.45	Lac-AEJH-Lac-AEJ |2	808324
3051	11.5597	11.7269	3051	0.999385	21	2;1	3	11.6518	1043.44	1043.45	Lac-AEJH-Lac-AEJ |2	8634602
3318	12.2701	12.5078	3318	0.9925	24	2	3	12.355	1114.48	1114.48	Lac-AEJH-Lac-AEJA |2	1130290
3008	11.4261	11.5597	3008	0.949559	14	2	3	11.4885	1114.48	1114.48	Lac-AEJH-Lac-AEJA |2	213131
3432	12.5603	12.647	3432	0.94295	11	2	3	12.6166	1114.48	1114.48	Lac-AEJH-Lac-AEJA |2	3537550
409	2.82461	3.2427	409	0.998517	82	2;1	3	2.99935	590.291	590.296	Lac-AEJK |1	8898515
3148	11.7962	11.9822	3148	0.999584	22	2	3	11.8817	1034.48	1034.48	Lac-AEJK-Lac-AEJ |2	4530297
2936	11.235	11.4968	2936	0.999674	35	2;1	3	11.3327	1034.48	1034.48	Lac-AEJK-Lac-AEJ |2	25256380
3837	13.79	13.8959	3837	0.997967	13	2	3	13.8401	1105.52	1105.52	Lac-AEJK-Lac-AEJA |2	714093
3675	13.314	13.4374	3675	0.992894	15	2	3	13.3628	1105.52	1105.52	Lac-AEJK-Lac-AEJA |2	2022550
3567	12.991	13.0675	3567	0.993518	10	2	3	13.0285	1105.51	1105.52	Lac-AEJK-Lac-AEJA |2	1265783
3319	12.2593	12.4729	3319	0.999338	25	2	3	12.3475	1105.51	1105.52	Lac-AEJK-Lac-AEJA |2	6681695
6510	23.3312	23.5731	6510	0.998147	14	2	3	23.4593	1108.46	1108.46	Lac-AEJM-Lac-AEJA |2	224784
7986	31.5694	31.5861	7986	0.85015	3	2	3	31.5786	1108.47	1108.46	Lac-AEJM-Lac-AEJA |2	125954
853	4.37476	4.75631	853	0.999079	103	1;2	3	4.53534	618.297	618.301	Lac-AEJR |1	9770701
674	3.82609	4.31187	674	0.999313	92	1;2	3	3.9816	618.297	618.301	Lac-AEJR |1	23031902
3280	12.1266	12.4992	3280	0.996262	44	2	3	12.2719	1062.48	1062.49	Lac-AEJR-Lac-AEJ |2	25999262
3458	12.6722	12.8797	3458	0.996456	35	2;1	3	12.7376	1062.48	1062.49	Lac-AEJR-Lac-AEJ |2	5214774
3596	13.118	13.2371	3596	0.99798	15	2	3	13.1812	1133.52	1133.52	Lac-AEJR-Lac-AEJA |2	7832734
3673	13.3054	13.4634	3673	0.998252	19	2	3	13.3725	1133.52	1133.52	Lac-AEJR-Lac-AEJA |2	2560368
3834	13.7987	13.9133	3834	0.990902	14	2	3	13.8436	1133.52	1133.52	Lac-AEJR-Lac-AEJA |2	944914
1044	5.05284	5.5512	1044	0.999141	57	1;2	2	5.27032	549.229	549.233	Lac-AEJS |1	2491352
962	4.69535	4.87338	962	0.998311	25	1;2	2	4.77313	549.229	549.233	Lac-AEJS |1	1263614
920	4.57872	4.63239	920	0.999898	7	1	2	4.60694	549.229	549.233	Lac-AEJS |1	209241
1211	5.67445	6.1357	1211	0.998938	65	1;2	2	5.9068	549.229	549.233	Lac-AEJS |1	1924159
571	3.44226	3.54688	571	0.998486	15	1;2	2	3.49626	549.229	549.233	Lac-AEJS |1	7322689
700	3.88686	3.92188	700	0.995313	4	1	3	3.90725	549.228	549.233	Lac-AEJS |1	106297
3652	13.254	13.4287	3652	0.99529	31	2;1	3	13.348	993.415	993.419	Lac-AEJS-Lac-AEJ |2	731910
3460	12.697	13.0081	3460	0.989288	46	2;1	3	12.7975	993.415	993.419	Lac-AEJS-Lac-AEJ |2	2929118
3760	13.5575	14.2025	3760	0.99962	120	1;2	3	13.8433	993.416	993.419	Lac-AEJS-Lac-AEJ |2	2019803
4233	14.9885	15.0145	4233	0.972437	4	2;1	3	15.0005	993.414	993.419	Lac-AEJS-Lac-AEJ |2	412353
4084	14.4964	14.5506	4084	0.985001	6	2	3	14.5168	993.415	993.419	Lac-AEJS-Lac-AEJ |2	389318
4145	14.7111	14.9277	4145	0.98755	26	2;1	3	14.7878	993.415	993.419	Lac-AEJS-Lac-AEJ |2	968995
3234	11.9997	12.6134	3234	0.997704	86	2;1	3	12.255	993.414	993.419	Lac-AEJS-Lac-AEJ |2	10828659
3638	13.254	13.4287	3638	0.986428	36	2;1	3	13.3211	1064.45	1064.46	Lac-AEJS-Lac-AEJA |2	3176199
4282	15.2334	15.2777	4282	0.796205	4	2	3	15.2511	1064.45	1064.46	Lac-AEJS-Lac-AEJA |2	519864
4213	14.9364	15.0662	4213	0.907912	16	2	3	15.0044	1064.45	1064.46	Lac-AEJS-Lac-AEJA |2	559083
4453	15.7154	15.7586	4453	0.762062	3	2	3	15.73	1064.45	1064.46	Lac-AEJS-Lac-AEJA |2	241208
4495	15.83	15.9446	4495	0.835373	10	2	3	15.8889	1064.45	1064.46	Lac-AEJS-Lac-AEJA |2	223932
3879	13.8417	14.0894	3879	0.992592	27	2;1	3	13.9552	1064.45	1064.46	Lac-AEJS-Lac-AEJA |2	981964
4183	14.7974	14.8508	4183	0.886951	3	2	3	14.8225	1064.45	1064.46	Lac-AEJS-Lac-AEJA |2	294118
3710	13.3851	14.0807	3710	0.999998	101	1;2	2	13.5447	561.265	561.269	Lac-AEJV |1	271232768
3206	11.9555	12.072	3206	0.999708	16	1	2	12.0132	561.265	561.269	Lac-AEJV |1	838590
5029	17.3792	17.4427	5029	0.966492	8	2	3	17.4103	1005.45	1005.45	Lac-AEJV-Lac-AEJ |2	217258
5874	20.6844	20.8587	5874	0.997166	40	1;2	3	20.7464	1005.45	1005.45	Lac-AEJV-Lac-AEJ |2	7189775
5671	19.7575	20.0391	5671	0.996459	59	2;1	3	19.8796	1005.45	1005.45	Lac-AEJV-Lac-AEJ |2	38289424
5757	20.1549	20.2922	5757	0.996078	26	2;1	3	20.2213	1005.45	1005.45	Lac-AEJV-Lac-AEJ |2	674656
5990	21.0818	21.125	5990	0.981734	3	2	3	21.1026	1005.45	1005.45	Lac-AEJV-Lac-AEJ |2	322867
5933	20.8761	21.0555	5933	0.988646	37	1;2	3	20.9717	1076.49	1076.49	Lac-AEJV-Lac-AEJA |2	5975833
6163	21.801	21.9433	6163	0.999321	25	1;2	3	21.8665	1076.49	1076.49	Lac-AEJV-Lac-AEJA |2	691997
4617	16.301	16.4235	4617	0.997928	14	1	2	16.3604	625.261	625.261	Lac-AEJY |1	1119674
3124	11.7875	11.8136	3124	0.997505	3	1	2	11.7997	625.26	625.261	Lac-AEJY |1	221145
5244	18.1235	18.2882	5244	0.99726	14	1	2	18.2025	625.26	625.261	Lac-AEJY |1	1792869
4328	15.304	15.698	4328	0.999624	68	1;2	2	15.4474	625.26	625.261	Lac-AEJY |1	182287328
5878	20.7268	20.9026	5878	0.999767	39	1;2	3	20.8005	1069.45	1069.45	Lac-AEJY-Lac-AEJ |2	5641039
5996	21.1164	21.2053	5996	0.992718	14	2;1	3	21.164	1069.45	1069.45	Lac-AEJY-Lac-AEJ |2	338941
6396	22.7431	22.8946	6396	0.998038	21	2;1	3	22.8221	1069.45	1069.45	Lac-AEJY-Lac-AEJ |2	368629
6816	24.9407	25.1837	6816	0.970383	26	1;2	3	25.0608	1069.45	1069.45	Lac-AEJY-Lac-AEJ |2	145508
5779	20.1923	20.6154	5779	0.996996	68	1;2	3	20.3275	1069.45	1069.45	Lac-AEJY-Lac-AEJ |2	43051156
5553	19.3307	19.4029	5553	0.993441	8	2	3	19.3682	1140.47	1140.48	Lac-AEJY-Lac-AEJA |2	190252
6220	21.9999	22.122	6220	0.998052	12	2	3	22.0495	1140.49	1140.48	Lac-AEJY-Lac-AEJA |2	127603
5943	20.9026	21.3575	5943	0.999837	89	1;2	3	21.1797	1140.48	1140.48	Lac-AEJY-Lac-AEJA |2	9844367
6094	21.5185	21.6866	6094	0.999375	24	2;1	3	21.5772	1140.48	1140.48	Lac-AEJY-Lac-AEJA |2	739038
6155	21.7749	21.9167	6155	0.986249	23	2;1	3	21.8376	1140.48	1140.48	Lac-AEJY-Lac-AEJA |2	865242
1748	7.72803	8.3263	1748	0.998482	71	1;2	2	7.95108	590.256	590.255	Lac-AEJ[AG]|1	1908293
1265	5.83465	6.06418	1265	0.994993	19	1;2	2	5.91004	590.255	590.255	Lac-AEJ[AG]|1	922957
2050	8.69489	8.89878	2050	0.99994	26	1;2	2	8.80281	590.255	590.255	Lac-AEJ[AG]|1	2379682
1217	5.68519	5.75461	1217	0.997973	6	1;2	2	5.73679	590.256	590.255	Lac-AEJ[AG]|1	397933
4307	15.269	15.3991	4307	0.999412	16	1	2	15.3387	632.303	632.306	Lac-AEJ[AV]|1	1016936
2453	9.77096	9.86099	2453	0.999872	6	1	2	9.8201	632.303	632.306	Lac-AEJ[AV]|1	92581
5016	17.3421	17.3966	5016	0.975593	4	2	3	17.3638	1020.43	1020.42	Lac-AEJ[GG]-Lac-AEJ |2	197333
3113	11.7096	11.9997	3113	0.999752	60	2;1	3	11.816	1020.43	1020.42	Lac-AEJ[GG]-Lac-AEJ |2	8383644
3298	12.1902	12.296	3298	0.992719	14	2;1	3	12.25	1020.43	1020.42	Lac-AEJ[GG]-Lac-AEJ |2	988086
3493	12.7396	12.8883	3493	0.993477	26	2;1	3	12.8116	1091.46	1091.46	Lac-AEJ[GG]-Lac-AEJA |2	2543600
507	3.13805	3.39121	507	0.998551	47	1;2	2	3.25259	576.239	576.239	Lac-AEJ[GG]|1	6587406
3064	11.5683	11.6466	3064	0.999878	10	1	2	11.6047	576.24	576.239	Lac-AEJ[GG]|1	452302
5167	17.7983	18.3859	5167	0.999984	117	1;2	2	18.1292	575.28	575.285	Lac-AEJ[L/I] |1	266730064
5858	20.555	20.6069	5858	0.99999	4	1	2	20.5886	575.28	575.285	Lac-AEJ[L/I] |1	674338
6723	24.4547	25.0215	6723	0.997559	101	1;2	3	24.6431	1019.47	1019.47	Lac-AEJ[L/I]-Lac-AEJ |2	4213086
6557	23.6015	24.2124	6557	0.999579	115	1;2	3	23.7716	1019.47	1019.47	Lac-AEJ[L/I]-Lac-AEJ |2	98508272
6930	25.6366	25.901	6930	0.985194	33	1;2	3	25.7362	1090.5	1090.51	Lac-AEJ[L/I]-Lac-AEJA |2	739057
7009	25.9728	26.1342	7009	0.94758	20	2;1	3	26.0447	1090.5	1090.51	Lac-AEJ[L/I]-Lac-AEJA |2	234313
6863	25.1997	25.4135	6863	0.999489	35	2;1	3	25.2851	1090.5	1090.51	Lac-AEJ[L/I]-Lac-AEJA |2	457618
6687	24.2672	24.4106	6687	0.997493	26	1;2	3	24.3362	1090.5	1090.51	Lac-AEJ[L/I]-Lac-AEJA |2	532212
7104	26.5588	26.613	7104	0.893448	6	2	3	26.581	1090.5	1090.51	Lac-AEJ[L/I]-Lac-AEJA |2	62691
2983	11.3917	11.4622	2983	0.78489	6	2	4	11.4254	1090.5	1090.51	Lac-AEJ[L/I]-Lac-AEJA |2	167348
6759	24.6603	25.0744	6759	0.999198	86	1;2	3	24.8107	1090.5	1090.51	Lac-AEJ[L/I]-Lac-AEJA |2	20203098
6484	23.243	23.3223	6484	0.995819	13	1;2	3	23.2832	1090.5	1090.51	Lac-AEJ[L/I]-Lac-AEJA |2	283827
542	3.25984	3.73879	542	0.999827	56	1	2	3.40352	462.196	462.196	Lac-AEJ|1	184513104

## Sheet: R20291 Av
Structure	Intensity		RT				Abundance			Oligomerisation	Intensity					Abundance
			Av		SD		Av		SD	state	R20291.1	R20291.2	R20291.3	SUM		R20291.1	R20291.2	R20291.3	Av
Lac-AEJA |1	4.07938e+09		6.6405	±	0.0229744		0.36007	±	0.0382917	1	4047234495	4111729247	4079183771	12238147513		0.414855	0.32234	0.355434	0.36007
Lac-AEJF |1	5.2783e+08		20.6984	±	0.0114131		0.0465893	±	0.00869985	1	333256942	618872770	631360299	1583490011		0.0341599	0.0485166	0.0550128	0.0465893
Lac-AEJG |1	4.84895e+08		4.04312	±	0.00817704		0.0427996	±	0.00949129	1	278231035	606878412	569576476	1454685923		0.0285196	0.0475763	0.0496293	0.0427996
Lac-AEJ[L/I] |1	2.43648e+08		18.1303	±	0.0131979		0.0215057	±	0.00322162	1	162171136	301367117	267404402	730942655		0.0166231	0.0236257	0.0232999	0.0215057
Lac-AEJV |1	2.16497e+08		13.5432	±	0.00839435		0.0191092	±	0.003696	1	143357599	234061069	272071358	649490026		0.0146946	0.0183493	0.0237066	0.0191092
Lac-AEJY |1	1.62258e+08		15.4507	±	0.013599		0.0143219	±	0.00185223	1	114100704	187253517	185421016	486775237		0.0116957	0.0146798	0.0161564	0.0143219
Lac-AEJ|1	1.54716e+08		3.40262	±	0.00655405		0.0136561	±	0.0030896	1	88233405	191400511	184513104	464147020		0.00904422	0.0150049	0.0160773	0.0136561
Lac-AEJR |1	32896168		3.97536	±	0.0134584		0.0029036	±	0.000264184	1	24971199	40914702	32802603	98688504		0.00255963	0.00320751	0.00285821	0.0029036
Lac-AEJAA|1	1.67528e+07		9.17644	±	0.0518089		0.0014787	±	4.71629e-05	1	13726316	19237348	17294684	50258348		0.00140699	0.00150811	0.00150695	0.0014787
Lac-AEJH |1	14282265		3.57943	±	0.0107455		0.00126063	±	0.00014521	1	10179066	17609488	15058241	42846795		0.00104339	0.0013805	0.00131208	0.00126063
Lac-AEJS |1	1.18072e+07		3.49552	±	0.00624594		0.00104217	±	0.00014289	1	8100648	14003622	13317352	35421622		0.000830343	0.00109782	0.00116039	0.00104217
Lac-AEJK |1	8.44967e+06		2.99694	±	0.00361854		0.000745816	±	2.65363e-05	1	6928963	9521542	8898515	25349020		0.000710242	0.000746443	0.000775361	0.000745816
Lac-AEJ[GG]|1	6.37566e+06		3.25217	±	0.00316988		0.000562752	±	6.48266e-05	1	4545131	7542151	7039708	19126990		0.000465891	0.000591268	0.000613396	0.000562752
Lac-AEJ[AG]|1	5.18598e+06		8.74765	±	0.0407472		0.000457744	±	6.38749e-05	1	3523122	6425942	5608865	15557929		0.000361132	0.000503763	0.000488721	0.000457744
Lac-AEJ[AV]|1	1.17258e+06		15.3426	±	0.0115263		0.000103499	±	2.99858e-05	1	638571	1769663	1109517	3517751		6.54556e-05	0.000138733	9.66763e-05	0.000103499
Lac-AEJ-Lac-AEJA |2	1696843076		14.6478	±	0.0171109		0.149773	±	0.00511986	2	1460119990	1986900303	1643508935	5090529228		0.149667	0.155763	0.143205	0.149773
Lac-AEJA-Lac-AEJA |2	9.60937e+08		15.5082	±	0.0132321		0.0848178	±	0.00535731	2	836779629	1155505387	890525514	2882810530		0.0857727	0.090586	0.0775948	0.0848178
Lac-AEJG-Lac-AEJ |2	4.23483e+08		12.7427	±	0.0616074		0.037379	±	0.00402018	2	306387320	497406852	466654547	1270448719		0.0314057	0.0389943	0.0406613	0.037379
Lac-AEJF-Lac-AEJ |2	1.81984e+08		25.6401	±	0.00505047		0.0160629	±	0.00101522	2	146779139	221725244	177446979	545951362		0.0150453	0.0173822	0.0154616	0.0160629
Lac-AEJ-JEA|2	1.61025e+08		14.3687	±	0.0165319		0.014213	±	0.000449757	2	133060173	180790339	169223508	483074020		0.0136391	0.0141731	0.0147451	0.014213
Lac-AEJ-Lac-AEJ |2	1.43322e+08		12.9724	±	0.0425701		0.0126505	±	0.00134323	2	105568368	180057778	144341280	429967426		0.0108211	0.0141157	0.012577	0.0126505
Lac-AEJG-Lac-AEJA |2	1.07724e+08		13.7783	±	0.016308		0.00950831	±	0.000684994	2	86974973	132845542	103350566	323171081		0.00891522	0.0104144	0.00900532	0.00950831
Lac-AEJ[L/I]-Lac-AEJ |2	101373951		23.7959	±	0.0269302		0.00894784	±	0.000404697	2	81798168	119602327	102721358	304121853		0.00838458	0.00937624	0.00895049	0.00894784
Lac-AEJF-Lac-AEJA |2	46540005		26.4515	±	0.00932359		0.00410789	±	0.000451418	2	35824657	59924885	43870473	139620015		0.00367215	0.00469782	0.0038226	0.00410789
Lac-AEJY-Lac-AEJ |2	4.64308e+07		20.3391	±	0.0128417		0.00409824	±	0.00033896	2	34974493	54772546	49545273	139292312		0.003585	0.0042939	0.00431706	0.00409824
Lac-AEJV-Lac-AEJ |2	42183217		19.9001	±	0.0182084		0.00372333	±	0.000295611	2	32613343	47242328	46693980	126549651		0.00334298	0.00370357	0.00406862	0.00372333
Lac-AEJR-Lac-AEJ |2	33385257		12.2664	±	0.0150104		0.00294677	±	0.000253426	2	27060051	41881684	31214036	100155771		0.00277374	0.00328332	0.00271979	0.00294677
Lac-AEJK-Lac-AEJ |2	32787547		11.3137	±	0.0230316		0.00289402	±	0.000282324	2	26970528	41605436	29786677	98362641		0.00276457	0.00326166	0.00259542	0.00289402
Lac-AEJ[L/I]-Lac-AEJA |2	2.50195e+07		24.8207	±	0.010575		0.00220836	±	0.000306625	2	26018508	26359872	22680164	75058544		0.00266698	0.00206649	0.00197621	0.00220836
Lac-AEJS-Lac-AEJ |2	1.89026e+07		12.2509	±	0.0171632		0.00166845	±	6.68443e-05	2	16056330	22371315	18280156	56707801		0.00164583	0.0017538	0.00159282	0.00166845
Lac-AEJH-Lac-AEJ |2	16927553		11.6376	±	0.0217089		0.00149412	±	0.000263838	2	13565407	23395702	13821550	50782659		0.0013905	0.00183411	0.00120432	0.00149412
Lac-AEJK-Lac-AEJA |2	1.14952e+07		12.3437	±	0.014697		0.00101464	±	0.000100841	2	9149830	14651777	10684121	34485728		0.000937888	0.00114863	0.000930947	0.00101464
Lac-AEJY-Lac-AEJA |2	1.10655e+07		21.1936	±	0.0098756		0.0009767	±	5.71952e-05	2	8703602	12726248	11766502	33196352		0.000892148	0.000997676	0.00102526	0.0009767
Lac-AEJ[GG]-Lac-AEJ |2	10242093		11.8055	±	0.0203286		0.000904025	±	9.0753e-05	2	8090479	13066737	9569063	30726279		0.000829301	0.00102437	0.000833788	0.000904025
Lac-AEJR-Lac-AEJA |2	10232002		13.2242	±	0.0326019		0.000903135	±	9.31609e-05	2	7488073	11869917	11338016	30696006		0.000767552	0.000930544	0.000987923	0.000903135
Lac-AEJV-Lac-AEJA |2	6.91633e+06		20.982	±	0.0113618		0.000610475	±	3.76012e-05	2	5657325	8423843	6667830	20748998		0.000579894	0.000660388	0.000580993	0.000610475
Lac-AEJS-Lac-AEJA |2	5.63382e+06		13.3325	±	0.0139825		0.000497273	±	1.90082e-05	2	4655581	6249497	5996368	16901446		0.000477212	0.00048993	0.000522486	0.000497273
Lac-AEJAA-Lac-AEJA |2	5.41878e+06		16.3364	±	0.00728355		0.000478293	±	9.58517e-05	2	3570967	5810323	6875058	16256348		0.000366036	0.000455501	0.000599049	0.000478293
Lac-AEJH-Lac-AEJA |2	4486924		12.5431	±	0.0539244		0.000396041	±	5.27842e-05	2	3083174	5496627	4880971	13460772		0.000316036	0.000430909	0.000425297	0.000396041
Lac-AEJ[GG]-Lac-AEJA |2	2.81078e+06		12.814	±	0.0111717		0.000248096	±	2.48386e-05	2	2312199	3576555	2543600	8432354		0.000237008	0.000280385	0.000221633	0.000248096
Lac-AEJM-Lac-AEJA |2	252411		23.4641	±	0.0178963		2.22792e-05	±	6.16212e-06	2	207542	198952	350738	757232		2.12737e-05	1.55969e-05	3.05611e-05	2.22792e-05
(Lac-AEJ)2-Lac-AEJA |3	5.41194e+08		18.5037	±	0.0207859		0.0477689	±	0.00211561	3	477000382	632524139	514058212	1623582733		0.0488941	0.0495868	0.0447918	0.0477689
(Lac-AEJA)2-LacAEJ |3	3.60147e+08		19.3599	±	0.0204455		0.0317886	±	0.0025034	3	312597796	441099113	326744557	1080441466		0.0320423	0.03458	0.0284705	0.0317886				R20291.1	R20291.2	R20291.3	Av.	SD
(Lac-AEJ)2-Lac-AEJG |3	1.0005e+08		16.8506	±	0.00647834		0.00883099	±	0.000851187	3	91135062	121438220	87576923	300150205		0.00934164	0.00952017	0.0076309	0.00883099		Monomers		0.537035	0.499266	0.548128	0.528143	0.0209153
(Lac-AEJA)3 |3	80213965		20.1269	±	0.0203531		0.00708014	±	0.000549422	3	63698387	99417083	77526425	240641895		0.00652929	0.00779382	0.00675516	0.00708014		Dimers		0.350917	0.382134	0.350655	0.361235	0.0147778
Lac-AEJA-LacAEJG-LacAEJ |3	4.31033e+07		17.7204	±	0.00805787		0.00380454	±	0.000366206	3	35087502	54690537	39531854	129309893		0.00359658	0.00428747	0.00344456	0.00380454		Trimers		0.10427	0.109639	0.0942416	0.102717	0.00638103
(Lac-AEJ)3 |3	2.75694e+07		17.1639	±	0.00936283		0.00243344	±	0.000338039	3	26967892	33058354	22682094	82708340		0.0027643	0.00259161	0.00197637	0.00243344		Tetramers		0.00714582	0.00824705	0.00632379	0.00723889	0.000787918
(Lac-AEJA)2-LacAEJG |3	1.10573e+07		18.4287	±	0.0169882		0.000975979	±	2.74342e-05	3	9358073	12913275	10900496	33171844		0.000959233	0.00101234	0.000949801	0.000975979		Pentamers		0.000631936	0.000714176	0.000650683	0.000665598	3.51917e-05
(Lac-AEJG)2-LacAEJ |3	1694282		16.0495	±	0.00900976		0.000149547	±	8.67607e-06	3	1392259	2054664	1635923	5082846		0.000142711	0.000161076	0.000142544	0.000149547		Crosslinking index		0.21178	0.229452	0.208139	0.216457	0.00930848
(Lac-AEJG)2-LacAEJA |3	1130438		16.8343	±	0.000704622		6.65193e-05	±	1.2595e-05	3		1342473	918403	2260876		0	0.000105243	8.00239e-05	6.65193e-05
(Lac-AEJA)2-(Lac-AEJ)2 |4	2.80234e+07		21.8605	±	0.00357615		0.00247351	±	0.000302302	4	23831780	36185123	24053416	84070319		0.00244284	0.00283674	0.00209586	0.00247351
Lac-AEJA-(Lac-AEJ)3 |4	2.5995e+07		21.1635	±	0.0109073		0.00229447	±	0.000246821	4	22801869	32665828	22517425	77985122		0.00233727	0.00256084	0.00196203	0.00229447
(Lac-AEJA)3-Lac-AEJ |4	1.08473e+07		22.5051	±	0.00601103		0.000957446	±	0.000110163	4	8769031	14059516	9713390	32541937		0.000898855	0.0011022	0.000846364	0.000957446
Lac-AEJA-(Lac-AEJ)2-Lac-AEJG |4	4.80081e+06		20.3793	±	0.0131951		0.000419948	±	5.79172e-05	4	4276579	6255350	3741369	14273298		0.000438363	0.000490389	0.000325999	0.000419948
(Lac-AEJ)3-Lac-AEJG |4	4757766		19.7302	±	0.0237474		0.000423747	±	6.85386e-05	4	3829738	6376613	4196090	14402441		0.000392561	0.000499896	0.000365621	0.000423747
(Lac-AEJA)4 |4	4.25353e+06		22.9353	±	0.0115543		0.00037544	±	4.44242e-05	4	3017545	5023990	4719041	12760576		0.000309308	0.000393856	0.000411188	0.00037544
(Lac-AEJ)4 |4	1.9023e+06		20.0183	±	0.0201768		0.000167908	±	2.37694e-05	4	1569877	2525123	1611896	5706896		0.000160918	0.000197957	0.00014045	0.000167908
(Lac-AEJA)2-Lac-AEJ-Lac-AEJG |4	1.46418e+06		21.0156	±	0.00933779		0.000129237	±	5.67167e-06	4	1203929	1742141	1446474	4392544		0.000123407	0.000136575	0.000126037	0.000129237
(Lac-AEJA)3-Lac-AEJG |4	347571		21.6291	±	0.00447695		3.06786e-05	±	6.01774e-06	4	339055	289536	414122	1042713		3.47543e-05	2.26982e-05	3.6084e-05	3.06786e-05
(Lac-AEJA)2-(Lac-AEJG)2 |4	78106.5		24.1095	±	0.0151332		4.59608e-06	±	1.79326e-07	4	73659		82554	156213		7.55029e-06	0	7.19324e-06	4.59608e-06
(Lac-AEJG)4 |4	77597.5		24.0831	±	0.0504621		4.56613e-06	±	5.35039e-07	4		75225	79970	155195		0	5.89728e-06	6.96808e-06	4.56613e-06
(Lac-AEJA)2-(Lac-AEJ)3 |5	2.38085e+06		23.7036	±	0.0185425		0.000210147	±	2.5634e-05	5	1774921	3095090	2272531	7142542		0.000181935	0.00024264	0.000198014	0.000210147
(Lac-AEJA)4-Lac-AEJ |5	1.63659e+06		24.6333	±	0.0038495		0.000144455	±	1.97248e-05	5	1681613	1587873	1640285	4909771		0.000172371	0.000124482	0.000142924	0.000144455
(Lac-AEJA)3-(Lac-AEJ)2 |5	1.59995e+06		24.2547	±	0.0157542		0.00014122	±	1.33111e-05	5	1201860	1988132	1609844	4799836		0.000123195	0.00015586	0.000140272	0.00014122
Lac-AEJA-(Lac-AEJ)4 |5	1.47918e+06		23.0989	±	0.016145		0.000130561	±	1.51341e-05	5	1154522	1921573	1361440	4437535		0.000118342	0.000150642	0.000118627	0.000130561
(Lac-AEJA)5 |5	484314		25.0837	±	0.00222595		4.27483e-05	±	6.16907e-06	5	352117	517281	583544	1452942		3.60932e-05	4.05523e-05	5.08463e-05	4.27483e-05
	11329858864						1				9755783629	12755891369	11476615452	33988290450		1	1	1

## Sheet: M7404.1
ID	xicStart	xicEnd	feature	corrMax	ionCount	chargeOrder	maxIsotopeCount	rt	mwMonoisotopic	theo_mwMonoisotopic	inferredStructure	maxIntensity		Structure	Intensity	RT	Abundance	Oligomerisation state
8113	31.9481	32.0034	8113	0.985016	8	2	3	31.9694	1421.6	1421.6	(Lac-AEJ)2-Lac-AEJA |3	49109		Lac-AEJA |1	3939595259	6.36981	0.328887	1
6839	24.6478	24.7288	6839	0.99156	7	2	3	24.6966	1421.61	1421.6	(Lac-AEJ)2-Lac-AEJA |3	160467		Lac-AEJF |1	628567966	20.6918	0.0524744	1
7138	26.3266	26.3815	7138	0.984929	6	2	3	26.35	1421.61	1421.6	(Lac-AEJ)2-Lac-AEJA |3	107878		Lac-AEJG |1	419839611	4.03943	0.0350493	1
6678	23.8569	24.5777	6678	0.96116	74	2	3	24.1946	1421.6	1421.6	(Lac-AEJ)2-Lac-AEJA |3	173024		Lac-AEJ[L/I] |1	234047909	18.1511	0.0195389	1
7172	26.5395	26.7737	7172	0.924554	24	2	3	26.6628	1421.61	1421.6	(Lac-AEJ)2-Lac-AEJA |3	87563		Lac-AEJV |1	151655027	13.5727	0.0126605	1
7229	26.8264	27.5821	7229	0.914014	72	2	3	27.1939	1421.61	1421.6	(Lac-AEJ)2-Lac-AEJA |3	116914		Lac-AEJY |1	150985453	15.4492	0.0126046	1
6463	22.6165	23.6462	6463	0.953644	100	2;3	3	23.1021	1421.61	1421.6	(Lac-AEJ)2-Lac-AEJA |3	353455		Lac-AEJ|1	129779944	3.39861	0.0108344	1
7363	27.7066	28.1546	7363	0.914701	45	2	3	27.9267	1421.6	1421.6	(Lac-AEJ)2-Lac-AEJA |3	96510		Lac-AEJR |1	34131795	3.96574	0.00284941	1
6865	24.7813	25.4499	6865	0.98551	58	2	3	25.1398	1421.61	1421.6	(Lac-AEJ)2-Lac-AEJA |3	160912		Lac-AEJAA|1	20812423	9.3289	0.00173747	1
6019	20.7786	22.5643	6019	0.990811	178	2	3	21.5485	1421.61	1421.6	(Lac-AEJ)2-Lac-AEJA |3	414041		Lac-AEJH |1	12633769	3.57077	0.0010547	1
7469	28.3388	28.7229	7469	0.892259	39	2	3	28.5419	1421.61	1421.6	(Lac-AEJ)2-Lac-AEJA |3	93216		Lac-AEJS |1	11709206	3.49329	0.000977514	1
5978	20.4853	20.6071	5978	0.974746	8	2	3	20.5473	1421.61	1421.6	(Lac-AEJ)2-Lac-AEJA |3	601412		Lac-AEJ[AG]|1	8819570	8.82684	0.00073628	1
5901	20.1934	20.3532	5901	0.979517	12	2	3	20.2648	1421.6	1421.6	(Lac-AEJ)2-Lac-AEJA |3	319678		Lac-AEJK |1	6604040	2.99684	0.000551322	1
5885	20.0396	20.1382	5885	0.977972	5	2	3	20.096	1421.6	1421.6	(Lac-AEJ)2-Lac-AEJA |3	328990		Lac-AEJ[GG]|1	5326934	3.24704	0.000444706	1
5377	18.2184	19.8732	5377	0.998996	214	2;1	3	18.5117	1421.61	1421.6	(Lac-AEJ)2-Lac-AEJA |3	546954880		Lac-AEJ[AV]|1	1529941	15.0712	0.000127723	1
28	0.546831	1.57127	28	0.946507	164	2	3	0.979095	1421.61	1421.6	(Lac-AEJ)2-Lac-AEJA |3	357241		Lac-AEJ-Lac-AEJA |2	2555824809	14.3741	0.213367	2
7826	30.2592	31.7635	7826	0.957696	149	2	3	31.0269	1421.61	1421.6	(Lac-AEJ)2-Lac-AEJA |3	68435		Lac-AEJA-Lac-AEJA |2	921591889	15.4931	0.0769368	2
5294	17.9029	18.0159	5294	0.999572	15	2;1	3	17.9529	1421.61	1421.6	(Lac-AEJ)2-Lac-AEJA |3	11310554		Lac-AEJG-Lac-AEJ |2	483568460	12.706	0.0403695	2
7554	28.8471	30.1538	7554	0.955287	115	2	3	29.4406	1421.61	1421.6	(Lac-AEJ)2-Lac-AEJA |3	77082		Lac-AEJF-Lac-AEJ |2	208364381	25.6536	0.0173948	2
7019	25.6836	26.1965	7019	0.966315	51	2	3	25.9332	1421.61	1421.6	(Lac-AEJ)2-Lac-AEJA |3	134650		Lac-AEJ-JEA|2	188139363	9.53389	0.0157063	2
6280	21.7342	21.8589	6280	0.997231	14	2	3	21.8	1407.58	1407.59	(Lac-AEJ)2-Lac-AEJG |3	547032		Lac-AEJ-Lac-AEJ |2	129940720	12.9922	0.0108478	2
6330	21.9557	22.0716	6330	0.997456	14	2	3	22.0221	1407.58	1407.59	(Lac-AEJ)2-Lac-AEJG |3	252844		Lac-AEJG-Lac-AEJA |2	93790718	13.798	0.00782988	2
6410	22.3764	22.5554	6410	0.998481	21	2	3	22.4626	1407.58	1407.59	(Lac-AEJ)2-Lac-AEJG |3	367375		Lac-AEJ[L/I]-Lac-AEJ |2	93588088	23.8319	0.00781297	2
6614	23.3787	23.5097	6614	0.95631	9	2	3	23.4604	1407.58	1407.59	(Lac-AEJ)2-Lac-AEJG |3	180224		Lac-AEJF-Lac-AEJA |2	50340015	26.4563	0.00420251	2
6772	24.2669	24.3995	6772	0.911591	13	2	4	24.3385	1407.58	1407.59	(Lac-AEJ)2-Lac-AEJG |3	104183		Lac-AEJY-Lac-AEJ |2	49012667	20.3311	0.0040917	2
5261	17.7331	17.8401	5261	0.999737	6	2	3	17.7975	1407.59	1407.59	(Lac-AEJ)2-Lac-AEJG |3	189599		Lac-AEJK-Lac-AEJ |2	37615577	11.3733	0.00314024	2
4888	16.6804	17.5932	4888	0.999034	116	2;1	3	16.8507	1407.59	1407.59	(Lac-AEJ)2-Lac-AEJG |3	102510912		Lac-AEJR-Lac-AEJ |2	37575023	12.3163	0.00313686	2
5006	17.0248	17.7244	5006	0.995858	86	2;1	3	17.1806	1350.57	1350.57	(Lac-AEJ)3 |3	24146982		Lac-AEJV-Lac-AEJ |2	32236591	19.8987	0.00269119	2
6939	25.1975	25.3016	6939	0.9604	4	2	4	25.2416	1851.76	1851.77	(Lac-AEJ)3-Lac-AEJG |4	68289		Lac-AEJS-Lac-AEJ |2	20476229	12.2772	0.00170941	2
7066	25.9198	26.0055	7066	0.885621	7	2	4	25.9553	1851.77	1851.77	(Lac-AEJ)3-Lac-AEJG |4	85274		Lac-AEJH-Lac-AEJ |2	18356535	11.6964	0.00153245	2
6771	24.2562	24.4523	6771	0.9902	18	2	3	24.3472	1851.77	1851.77	(Lac-AEJ)3-Lac-AEJG |4	282737		Lac-AEJ[L/I]-Lac-AEJA |2	15480976	24.8081	0.00129239	2
5843	19.951	20.0575	5843	0.816032	8	2	3	19.9974	1851.78	1851.77	(Lac-AEJ)3-Lac-AEJG |4	460035		Lac-AEJK-Lac-AEJA |2	12907912	12.3925	0.00107758	2
5738	19.546	19.8645	5738	0.981239	59	2;3	3	19.7269	1851.78	1851.77	(Lac-AEJ)3-Lac-AEJG |4	4111083		Lac-AEJY-Lac-AEJA |2	10754989	21.1865	0.000897854	2
5829	19.9247	20.103	5829	0.97289	19	2	3	20.0101	1794.76	1794.75	(Lac-AEJ)4 |4	1820783		Lac-AEJ[GG]-Lac-AEJ |2	10216069	11.8648	0.000852863	2
6242	21.5721	22.5464	6242	0.990556	214	2;3	3	21.8691	1936.83	1936.83	(Lac-AEJA)2-(Lac-AEJ)2 |4	26612536		Lac-AEJR-Lac-AEJA |2	9112574	13.2706	0.000760741	2
6472	22.6694	23.0099	6472	0.959773	17	2	3	22.7918	1936.83	1936.83	(Lac-AEJA)2-(Lac-AEJ)2 |4	152133		Lac-AEJS-Lac-AEJA |2	4876233	13.3643	0.00040708	2
6159	21.2577	21.3589	6159	0.972586	16	2;3	3	21.2911	1936.83	1936.83	(Lac-AEJA)2-(Lac-AEJ)2 |4	422334		Lac-AEJH-Lac-AEJA |2	4244137	12.6608	0.000354311	2
6616	23.4196	24.0857	6616	0.980349	122	3;2	5	23.7054	2381.01	2381.01	(Lac-AEJA)2-(Lac-AEJ)3 |5	2339851		Lac-AEJV-Lac-AEJA |2	4234654	20.9701	0.00035352	2
6764	24.1938	24.2383	6764	0.817006	3	3	3	24.2152	2381.02	2381.01	(Lac-AEJA)2-(Lac-AEJ)3 |5	70975		Lac-AEJAA-Lac-AEJA |2	3736159	16.3357	0.000311904	2
6566	23.1862	23.2037	6566	0.843348	3	3	4	23.1951	2381.01	2381.01	(Lac-AEJA)2-(Lac-AEJ)3 |5	94226		Lac-AEJ[GG]-Lac-AEJA |2	2411890	12.8571	0.000201351	2
6147	21.2315	21.4575	6147	0.998207	39	2;3	4	21.3186	1993.86	1993.85	(Lac-AEJA)2-Lac-AEJ-Lac-AEJG |4	281343		Lac-AEJM-Lac-AEJA |2	359129	23.464	2.9981e-05	2
6059	20.8675	21.1082	6059	0.932313	52	2;3	3	20.9913	1993.85	1993.85	(Lac-AEJA)2-Lac-AEJ-Lac-AEJG |4	939258		(Lac-AEJ)2-Lac-AEJA |3	561966011	18.5117	0.0469143	3
5586	19.0041	20.6242	5586	0.997257	214	2;1	3	19.3686	1492.64	1492.64	(Lac-AEJA)2-LacAEJ |3	322549376		(Lac-AEJA)2-LacAEJ |3	327624743	19.3686	0.0273509	3
8036	31.3793	31.4364	8036	0.997074	5	2	3	31.4093	1492.64	1492.64	(Lac-AEJA)2-LacAEJ |3	34484		(Lac-AEJ)2-Lac-AEJG |3	104152169	16.8507	0.00869488	3
6096	20.9581	21.0212	6096	0.940057	3	2	3	20.9887	1492.64	1492.64	(Lac-AEJA)2-LacAEJ |3	180598		(Lac-AEJA)3 |3	66103139	20.1259	0.00551846	3
7982	31.056	31.1193	7982	0.983461	4	2	3	31.088	1492.64	1492.64	(Lac-AEJA)2-LacAEJ |3	31971		Lac-AEJA-LacAEJG-LacAEJ |3	38095611	17.724	0.00318032	3
7518	28.6166	28.7054	7518	0.984216	6	2	3	28.6588	1492.64	1492.64	(Lac-AEJA)2-LacAEJ |3	52187		(Lac-AEJ)3 |3	24146982	17.1806	0.00201585	3
7597	29.0355	29.2071	7597	0.932526	7	2	3	29.1365	1492.64	1492.64	(Lac-AEJA)2-LacAEJ |3	53055		(Lac-AEJA)2-LacAEJG |3	9047443	18.4336	0.000755303	3
5468	18.6167	18.741	5468	0.992461	15	2	3	18.6881	1492.65	1492.64	(Lac-AEJA)2-LacAEJ |3	2088345		(Lac-AEJG)2-LacAEJ |3	1528732	16.0398	0.000127622	3
7910	30.7522	30.8333	7910	0.979198	5	2	3	30.7949	1492.64	1492.64	(Lac-AEJA)2-LacAEJ |3	36829		(Lac-AEJG)2-LacAEJA |3	1028679	16.836	8.58767e-05	3
7663	29.4098	29.5264	7663	0.952901	9	2	3	29.4643	1492.64	1492.64	(Lac-AEJA)2-LacAEJ |3	48538		Lac-AEJA-(Lac-AEJ)3 |4	29289582	21.1483	0.00244517	4
7694	29.5694	29.6858	7694	0.982664	5	2	3	29.6271	1492.64	1492.64	(Lac-AEJA)2-LacAEJ |3	32839		(Lac-AEJA)2-(Lac-AEJ)2 |4	27187003	21.8691	0.00226964	4
7573	28.9145	28.9427	7573	0.938216	3	2	3	28.9252	1492.64	1492.64	(Lac-AEJA)2-LacAEJ |3	47787		(Lac-AEJA)3-Lac-AEJ |4	8440477	22.5182	0.000704632	4
6886	24.9124	25.4499	6886	0.865705	43	2	3	25.1804	1492.65	1492.64	(Lac-AEJA)2-LacAEJ |3	93290		(Lac-AEJ)3-Lac-AEJG |4	5007418	19.7269	0.000418032	4
7503	28.5134	28.5472	7503	0.978603	3	2	3	28.5301	1492.64	1492.64	(Lac-AEJA)2-LacAEJ |3	38864		Lac-AEJA-(Lac-AEJ)2-Lac-AEJG |4	4741750	20.3672	0.000395853	4
6253	21.5808	21.743	6253	0.905671	12	2	3	21.6665	1492.65	1492.64	(Lac-AEJA)2-LacAEJ |3	252168		(Lac-AEJA)4 |4	3714499	22.9435	0.000310096	4
7025	25.7097	25.7995	7025	0.958912	6	2	3	25.7477	1492.64	1492.64	(Lac-AEJA)2-LacAEJ |3	69747		(Lac-AEJ)4 |4	1820783	20.0101	0.000152004	4
6841	24.6126	24.7288	6841	0.995709	5	2	3	24.6726	1492.64	1492.64	(Lac-AEJA)2-LacAEJ |3	84650		(Lac-AEJA)2-Lac-AEJ-Lac-AEJG |4	1220601	20.9913	0.000101899	4
7058	25.8521	26.1243	7058	0.959809	15	2	3	25.9959	1492.65	1492.64	(Lac-AEJA)2-LacAEJ |3	68827		(Lac-AEJA)3-Lac-AEJG |4	379855	21.6334	3.17112e-05	4
6759	24.1849	24.3638	6759	0.977406	9	2	3	24.2807	1492.64	1492.64	(Lac-AEJA)2-LacAEJ |3	94875		(Lac-AEJG)4 |4	363726	17.5541	3.03648e-05	4
6689	23.8135	23.8827	6689	0.968571	4	2	3	23.8459	1492.64	1492.64	(Lac-AEJA)2-LacAEJ |3	151967		(Lac-AEJA)2-(Lac-AEJ)3 |5	2505052	23.7054	0.000209128	5
7145	26.3266	26.3638	7145	0.982405	4	2	3	26.3463	1492.65	1492.64	(Lac-AEJA)2-LacAEJ |3	76116		Lac-AEJA-(Lac-AEJ)4 |5	1905905	23.1057	0.00015911	5		3.03335e-05
6162	21.1968	21.3127	6162	0.944946	5	2	3	21.2566	1492.64	1492.64	(Lac-AEJA)2-LacAEJ |3	441072		(Lac-AEJA)4-Lac-AEJ |5	1567815	24.6153	0.000130885	5
6639	23.547	23.6835	6639	0.96138	7	2	3	23.6093	1492.64	1492.64	(Lac-AEJA)2-LacAEJ |3	91965		(Lac-AEJA)3-(Lac-AEJ)2 |5	1512089	24.2509	0.000126233	5
6568	23.1686	23.4304	6568	0.915965	22	2	3	23.2798	1492.64	1492.64	(Lac-AEJA)2-LacAEJ |3	137912		(Lac-AEJA)5 |5	411916	25.0702	3.43878e-05	5
6487	22.7058	22.8489	6487	0.968779	13	2	3	22.7735	1492.64	1492.64	(Lac-AEJA)2-LacAEJ |3	155766
7245	26.9156	27.2358	7245	0.999773	21	2	3	27.1039	1492.65	1492.64	(Lac-AEJA)2-LacAEJ |3	53810		Sum intensity	11978556614
7317	27.4587	27.5024	7317	0.950297	3	2	3	27.486	1492.64	1492.64	(Lac-AEJA)2-LacAEJ |3	47619
7445	28.1157	28.1546	7445	0.918719	4	2	3	28.138	1492.65	1492.64	(Lac-AEJA)2-LacAEJ |3	55737
6291	21.8047	22.5554	6291	0.955447	61	2	3	22.1438	1492.64	1492.64	(Lac-AEJA)2-LacAEJ |3	266438
7196	26.5395	26.6706	7196	0.974463	6	2	3	26.6094	1492.65	1492.64	(Lac-AEJA)2-LacAEJ |3	56813
6710	23.9365	24.132	6710	0.944204	16	2	3	24.0258	1492.65	1492.64	(Lac-AEJA)2-LacAEJ |3	103243
10	0.546831	1.53169	10	0.995713	127	2	3	0.912656	1492.64	1492.64	(Lac-AEJA)2-LacAEJ |3	127855
5553	18.9084	19.0041	5553	0.995952	12	2	3	18.9552	1549.67	1549.66	(Lac-AEJA)2-LacAEJG |3	653103
5405	18.351	18.497	5405	0.98611	18	2	3	18.4336	1549.66	1549.66	(Lac-AEJA)2-LacAEJG |3	6769428
5497	18.6884	18.8282	5497	0.999174	17	2	3	18.758	1549.67	1549.66	(Lac-AEJA)2-LacAEJG |3	1624912
6015	20.7526	21.0018	6015	0.990262	27	2	3	20.8293	1563.68	1563.68	(Lac-AEJA)3 |3	3197123
5810	19.8036	20.5986	5810	0.998976	106	1;2;3	3	20.1259	1563.68	1563.68	(Lac-AEJA)3 |3	62906016
6720	23.9704	24.7462	6720	0.98872	142	3;2	5	24.2509	2452.05	2452.05	(Lac-AEJA)3-(Lac-AEJ)2 |5	1512089
6386	22.2428	23.2127	6386	0.985219	192	2;3	3	22.5182	2007.87	2007.86	(Lac-AEJA)3-Lac-AEJ |4	8440477
7005	25.6836	25.8084	7005	0.837109	18	2;3	3	25.7265	2064.87	2064.89	(Lac-AEJA)3-Lac-AEJG |4	135742
6244	21.5808	21.6817	6244	0.971398	23	2;3	4	21.6334	2064.89	2064.89	(Lac-AEJA)3-Lac-AEJG |4	203573
7068	25.8697	25.945	7068	0.98233	3	2;3	3	25.9048	2064.87	2064.89	(Lac-AEJA)3-Lac-AEJG |4	40540
6567	23.1775	23.3963	6567	0.983427	50	2;3	4	23.2658	2078.91	2078.9	(Lac-AEJA)4 |4	1089138
6506	22.8489	23.0628	6506	0.97741	50	3;2	3	22.9435	2078.91	2078.9	(Lac-AEJA)4 |4	2395644
6630	23.5292	23.6372	6630	0.848442	23	2;3	4	23.5794	2078.9	2078.9	(Lac-AEJA)4 |4	229717
6814	24.5055	24.7201	6814	0.991408	44	3;2	5	24.6153	2523.09	2523.09	(Lac-AEJA)4-Lac-AEJ |5	787908
1476	6.17011	6.29578	1476	0.782989	8	6	3	6.22901	2523.1	2523.09	(Lac-AEJA)4-Lac-AEJ |5	52259
6923	25.1073	25.233	6923	0.797196	12	3	5	25.1689	2523.1	2523.09	(Lac-AEJA)4-Lac-AEJ |5	86706
6864	24.8161	25.0451	6864	0.978046	42	2;3	5	24.8972	2523.09	2523.09	(Lac-AEJA)4-Lac-AEJ |5	427658
1761	7.50495	7.54851	1761	0.842296	3	6	3	7.52635	2523.1	2523.09	(Lac-AEJA)4-Lac-AEJ |5	78753
1573	6.77502	6.86342	1573	0.826178	7	6	3	6.81699	2523.1	2523.09	(Lac-AEJA)4-Lac-AEJ |5	134531
6947	25.2663	25.3963	6947	0.859822	14	3	4	25.3321	2594.13	2594.12	(Lac-AEJA)5 |5	136932
6900	24.9935	25.1517	6900	0.984107	27	3;2	5	25.0702	2594.13	2594.12	(Lac-AEJA)5 |5	274984
4654	15.9336	16.1559	4654	0.997611	26	2	3	16.0398	1464.61	1464.61	(Lac-AEJG)2-LacAEJ |3	1528732
4921	16.7684	16.9704	4921	0.968252	20	2	3	16.836	1535.65	1535.65	(Lac-AEJG)2-LacAEJA |3	1028679
6708	23.9176	24.0946	6708	0.941483	18	3	4	24.0121	2022.86	2022.84	(Lac-AEJG)4 |4	73280
5189	17.5229	17.5845	5189	0.885048	4	3	3	17.5541	2022.86	2022.84	(Lac-AEJG)4 |4	175369
6751	24.1584	24.2026	6751	0.982572	4	3	4	24.1821	2022.85	2022.84	(Lac-AEJG)4 |4	115077
1586	6.88076	6.9666	1586	0.989433	8	2	2	6.92441	834.361	834.36	Lac-AEJ-JEA|2	749695
1612	7.02034	7.07227	1612	0.997624	4	2	3	7.03719	834.361	834.36	Lac-AEJ-JEA|2	541051
2688	10.2803	10.697	2688	0.999421	54	2;1	3	10.5653	834.361	834.36	Lac-AEJ-JEA|2	29363648
4357	15.0454	15.3532	4357	0.999942	57	2;1	3	15.151	834.361	834.36	Lac-AEJ-JEA|2	34327972
4022	14.0202	14.0808	4022	0.996915	8	2	3	14.0509	834.361	834.36	Lac-AEJ-JEA|2	936466
4103	14.2613	14.7509	4103	0.999336	74	2;1	3	14.3723	834.361	834.36	Lac-AEJ-JEA|2	51084492
2174	8.70476	8.80266	2174	0.999608	8	2	3	8.76908	834.361	834.36	Lac-AEJ-JEA|2	325750
2218	8.88051	8.94122	2218	0.992446	8	2	3	8.90945	834.361	834.36	Lac-AEJ-JEA|2	953276
2284	9.07155	10.0714	2284	0.998728	152	2;1	3	9.53389	834.362	834.36	Lac-AEJ-JEA|2	53903080
1939	8.07488	8.46541	1939	0.999696	70	2;1	3	8.23235	834.362	834.36	Lac-AEJ-JEA|2	15953933
3622	12.886	13.2211	3622	0.999163	78	1;2	3	12.9922	906.383	906.382	Lac-AEJ-Lac-AEJ |2	111334472
3798	13.4289	13.6466	3798	0.999829	48	1;2	3	13.5346	906.383	906.382	Lac-AEJ-Lac-AEJ |2	18606248
4091	14.2354	14.8374	4091	0.999332	139	2;1	2	14.3741	977.42	977.419	Lac-AEJ-Lac-AEJA |2	1589305472
6652	23.582	23.6104	6652	0.95869	3	1	2	23.5937	977.419	977.419	Lac-AEJ-Lac-AEJA |2	61187
5747	19.4466	19.5813	5747	0.974402	5	2	2	19.5243	977.421	977.419	Lac-AEJ-Lac-AEJA |2	145465
4731	16.1923	16.4065	4731	0.976952	23	1;2	2	16.3101	977.421	977.419	Lac-AEJ-Lac-AEJA |2	1023549
5580	18.9084	19.1031	5580	0.989231	11	2;1	2	19.012	977.421	977.419	Lac-AEJ-Lac-AEJA |2	262224
4817	16.4762	18.1137	4817	0.989504	234	2;1	3	17.0724	977.421	977.419	Lac-AEJ-Lac-AEJA |2	1004977
5455	18.5903	18.8282	5455	0.996717	15	2;1	3	18.6796	977.421	977.419	Lac-AEJ-Lac-AEJA |2	290282
27	0.546831	1.57127	27	0.997388	182	2;1	3	0.887575	977.422	977.419	Lac-AEJ-Lac-AEJA |2	669015
5388	18.2794	18.4035	5388	0.981724	14	1;2	3	18.3454	977.42	977.419	Lac-AEJ-Lac-AEJA |2	390650
4035	14.0202	14.1582	4035	0.997058	32	1;2	3	14.0612	977.421	977.419	Lac-AEJ-Lac-AEJA |2	22980660
4312	14.8882	16.1037	4312	0.999595	264	1;2	2	15.1574	977.42	977.419	Lac-AEJ-Lac-AEJA |2	939691328
2842	10.697	10.7924	2842	0.995459	10	1	2	10.7563	533.235	533.233	Lac-AEJA |1	600743
2868	10.8444	11.1365	2868	0.999224	26	1	2	10.9686	533.234	533.233	Lac-AEJA |1	1548905
5820	19.8301	19.9076	5820	0.995065	4	1	2	19.8815	533.235	533.233	Lac-AEJA |1	560819
2651	10.2262	10.4748	2651	0.993456	26	1	2	10.3516	533.234	533.233	Lac-AEJA |1	502022
3206	11.7811	12.0527	3206	0.999986	21	1	2	11.9339	533.235	533.233	Lac-AEJA |1	288639
3545	12.7886	12.912	3545	0.991897	9	1	2	12.8368	533.235	533.233	Lac-AEJA |1	215045
11	0.546831	0.58908	11	0.998647	5	1	2	0.561722	533.235	533.233	Lac-AEJA |1	201144
3349	12.1768	12.2223	3349	0.999613	5	1	2	12.1971	533.234	533.233	Lac-AEJA |1	160122
4216	14.5591	14.6197	4216	0.992612	4	1	2	14.5967	533.235	533.233	Lac-AEJA |1	200264
3051	11.3941	11.4998	3051	0.999127	11	1	2	11.4499	533.234	533.233	Lac-AEJA |1	397544
1512	6.55928	10.0714	1512	0.999723	450	2;1	2	6.67285	533.234	533.233	Lac-AEJA |1	1830359296
3389	12.2851	12.3555	3389	0.970245	6	1	2	12.3191	533.233	533.233	Lac-AEJA |1	257351
1442	6.03815	6.39079	1442	0.999471	51	1;2	2	6.36981	533.234	533.233	Lac-AEJA |1	2103719424
1254	5.45537	5.61349	1254	0.995788	10	1	2	5.5248	533.234	533.233	Lac-AEJA |1	86293
3433	12.4412	12.6192	3433	0.99689	16	1	2	12.5166	533.232	533.233	Lac-AEJA |1	215054
1081	4.71342	4.89961	1081	0.999389	17	1	2	4.82377	533.234	533.233	Lac-AEJA |1	282594
5900	20.1845	20.6503	5900	0.983891	82	3;2	3	20.3672	1922.81	1922.81	Lac-AEJA-(Lac-AEJ)2-Lac-AEJG |4	3724438
6011	20.7267	20.822	6011	0.951682	9	2	3	20.7528	1922.81	1922.81	Lac-AEJA-(Lac-AEJ)2-Lac-AEJG |4	947302
6874	24.8774	24.9213	6874	0.950986	4	2	3	24.9006	1922.81	1922.81	Lac-AEJA-(Lac-AEJ)2-Lac-AEJG |4	70010
5994	20.5639	20.6416	5994	0.920126	10	2	3	20.6102	1865.79	1865.79	Lac-AEJA-(Lac-AEJ)3 |4	1329575
6080	20.9403	21.6091	6080	0.985616	136	2;3	3	21.1483	1865.79	1865.79	Lac-AEJA-(Lac-AEJ)3 |4	27807590
6302	21.8765	22.0716	6302	0.893209	12	2	3	21.9691	1865.79	1865.79	Lac-AEJA-(Lac-AEJ)3 |4	152417
6537	22.9746	23.3192	6537	0.964624	71	3;2	5	23.1057	2309.98	2309.98	Lac-AEJA-(Lac-AEJ)4 |5	1905905
132	1.33635	1.36213	132	0.898915	4	2	3	1.34703	1048.46	1048.46	Lac-AEJA-Lac-AEJA |2	20312
12	0.546831	1.14996	12	0.989762	59	2;1	3	0.769181	1048.46	1048.46	Lac-AEJA-Lac-AEJA |2	192661
5249	17.698	17.8051	5249	0.998065	6	2	3	17.7507	1048.46	1048.46	Lac-AEJA-Lac-AEJA |2	251796
4448	15.3008	15.8706	4448	0.996309	126	2;1	3	15.4931	1048.46	1048.46	Lac-AEJA-Lac-AEJA |2	522984256
5121	17.3411	17.4946	5121	0.996277	8	2	3	17.4052	1048.46	1048.46	Lac-AEJA-Lac-AEJA |2	244912
4667	15.9686	17.2004	4667	0.996904	215	2;1	3	16.2645	1048.46	1048.46	Lac-AEJA-Lac-AEJA |2	397897952
5180	17.5142	18.421	5180	0.996134	115	2;1	3	17.724	1478.63	1478.63	Lac-AEJA-LacAEJG-LacAEJ |3	37581756
5466	18.6167	18.7057	5466	0.958581	9	2	3	18.659	1478.63	1478.63	Lac-AEJA-LacAEJG-LacAEJ |3	282272
5571	18.9257	19.1119	5571	0.882884	14	2	3	19.0098	1478.63	1478.63	Lac-AEJA-LacAEJG-LacAEJ |3	231583
4999	16.9879	17.0772	4999	0.971962	11	2	3	17.0338	1119.5	1119.49	Lac-AEJAA-Lac-AEJA |2	628810
4738	16.2927	16.4065	4738	0.997645	14	2	3	16.3357	1119.5	1119.49	Lac-AEJAA-Lac-AEJA |2	2610691
4822	16.4935	16.581	4822	0.996368	11	2	3	16.5403	1119.5	1119.49	Lac-AEJAA-Lac-AEJA |2	496658
2343	9.21931	9.45437	2343	0.999874	28	1	2	9.3289	604.271	604.27	Lac-AEJAA|1	9923775
2240	8.93252	9.14989	2240	0.99888	41	2;1	2	9.02767	604.271	604.27	Lac-AEJAA|1	3408490
2719	10.3499	10.4926	2719	0.999327	10	1	2	10.4148	604.272	604.27	Lac-AEJAA|1	528194
2821	10.6266	10.8547	2821	0.999926	28	1;2	2	10.7558	604.271	604.27	Lac-AEJAA|1	6951964
6367	22.1267	22.3938	6367	0.999179	40	1;2	2	22.2572	609.265	609.269	Lac-AEJF |1	5870880
5956	20.4328	21.1783	5956	0.998957	122	2;1	2	20.6918	609.265	609.269	Lac-AEJF |1	622348416
6142	21.2315	21.6179	6142	0.994129	31	1	2	21.4079	609.265	609.269	Lac-AEJF |1	348670
7322	27.4676	27.7838	7322	0.993137	23	1;2	3	27.6087	1053.45	1053.45	Lac-AEJF-Lac-AEJ |2	103072
7415	27.9941	28.0513	7415	0.998685	5	2	3	28.0291	1053.45	1053.45	Lac-AEJF-Lac-AEJ |2	44846
7522	28.6283	28.7229	7522	0.996086	5	2;1	3	28.6885	1053.45	1053.45	Lac-AEJF-Lac-AEJ |2	70783
6971	25.3963	27.3958	6971	0.999392	399	1;2	3	25.6536	1053.45	1053.45	Lac-AEJF-Lac-AEJ |2	208145680
7262	27.0317	27.0727	7262	0.989791	5	2	3	27.0496	1124.49	1124.49	Lac-AEJF-Lac-AEJA |2	71621
7232	26.8545	26.9791	7232	0.99792	8	2	3	26.9166	1124.49	1124.49	Lac-AEJF-Lac-AEJA |2	71581
7367	27.733	27.8881	7367	0.993123	15	2;1	3	27.7949	1124.49	1124.49	Lac-AEJF-Lac-AEJA |2	135376
7542	28.7407	28.9427	7542	0.994634	39	2;1	3	28.8408	1124.49	1124.49	Lac-AEJF-Lac-AEJA |2	406324
7086	26.034	26.1965	7086	0.998474	28	1;2	3	26.1072	1124.49	1124.49	Lac-AEJF-Lac-AEJA |2	672942
6983	25.441	25.6836	6983	0.968579	42	2;1	3	25.5589	1124.49	1124.49	Lac-AEJF-Lac-AEJA |2	5580126
7453	28.2247	28.4701	7453	0.996961	49	2;1	3	28.3286	1124.49	1124.49	Lac-AEJF-Lac-AEJA |2	1998563
7421	28.0352	28.1157	7421	0.83097	8	2	3	28.073	1124.49	1124.49	Lac-AEJF-Lac-AEJA |2	64892
7288	27.2123	27.6436	7288	0.998997	91	2;1	3	27.3878	1124.49	1124.49	Lac-AEJF-Lac-AEJA |2	3425566
7135	26.3007	26.7366	7135	0.998685	94	2;1	3	26.4563	1124.49	1124.49	Lac-AEJF-Lac-AEJA |2	37913024
1148	5.03605	5.07857	1148	0.999999	3	1	2	5.05258	519.218	519.218	Lac-AEJG |1	656482
1258	5.47272	5.72869	1258	0.998525	20	1	2	5.60241	519.219	519.218	Lac-AEJG |1	809315
792	3.84609	4.74825	792	0.999903	145	1;2	2	4.03943	519.218	519.218	Lac-AEJG |1	415922304
1412	5.91457	6.24167	1412	0.99971	31	1	2	6.08254	519.219	519.218	Lac-AEJG |1	775060
1117	4.86519	4.95076	1117	0.999614	8	1	2	4.90445	519.218	519.218	Lac-AEJG |1	440872
3537	12.6701	12.7626	3537	0.99774	5	1	2	12.702	519.218	519.218	Lac-AEJG |1	1235578
3913	13.7241	14.0637	3913	0.989288	27	2	3	13.8691	963.405	963.403	Lac-AEJG-Lac-AEJ |2	587756
3510	12.5824	13.0846	3510	0.998515	110	2;1	3	12.706	963.404	963.403	Lac-AEJG-Lac-AEJ |2	357584896
3862	13.6212	13.6638	3862	0.989533	5	2	3	13.6442	963.405	963.403	Lac-AEJG-Lac-AEJ |2	641808
3683	13.144	13.5434	3683	0.997929	88	2;1	3	13.2637	963.404	963.403	Lac-AEJG-Lac-AEJ |2	124754000
4095	14.2528	14.3621	4095	0.984816	25	2;1	3	14.3242	1034.44	1034.44	Lac-AEJG-Lac-AEJA |2	14676682
4179	14.5158	14.7941	4179	0.984793	36	1;2	3	14.6378	1034.44	1034.44	Lac-AEJG-Lac-AEJA |2	1654807
3882	13.6638	14.0287	3882	0.998633	73	2;1	3	13.798	1034.44	1034.44	Lac-AEJG-Lac-AEJA |2	75555336
4441	15.2921	15.3793	4441	0.998893	13	2;1	3	15.3507	1034.44	1034.44	Lac-AEJG-Lac-AEJA |2	651127
3460	12.4671	12.6192	3460	0.994119	18	2	3	12.5253	1034.44	1034.44	Lac-AEJG-Lac-AEJA |2	1252766
596	3.15463	3.29456	596	0.999828	25	1;2	3	3.21351	599.255	599.26	Lac-AEJH |1	4165024
645	3.45037	3.82021	645	0.998603	68	1;2	3	3.57077	599.256	599.26	Lac-AEJH |1	8468745
3282	12.0093	12.1242	3282	0.999573	12	2	3	12.047	1043.44	1043.45	Lac-AEJH-Lac-AEJ |2	1071686
3138	11.6055	11.7811	3138	0.999427	22	1;2	3	11.6964	1043.44	1043.45	Lac-AEJH-Lac-AEJ |2	10928437
3028	11.3228	11.4998	3028	0.999129	21	2	3	11.3979	1043.44	1043.45	Lac-AEJH-Lac-AEJ |2	6356412
3520	12.6105	12.6952	3520	0.998154	11	2	3	12.6608	1114.48	1114.48	Lac-AEJH-Lac-AEJA |2	2669264
3387	12.3195	12.5563	3387	0.997629	24	2	3	12.4053	1114.48	1114.48	Lac-AEJH-Lac-AEJA |2	1458618
3109	11.4998	11.5864	3109	0.995074	5	2	3	11.535	1114.48	1114.48	Lac-AEJH-Lac-AEJA |2	116255
477	2.82447	3.24161	477	0.99809	90	1;2	2	2.99684	590.292	590.296	Lac-AEJK |1	6604040
3226	11.8415	12.0441	3226	0.997006	23	2	3	11.9272	1034.48	1034.48	Lac-AEJK-Lac-AEJ |2	6621475
3015	11.2711	11.5432	3015	0.999061	46	2;1	3	11.3733	1034.48	1034.48	Lac-AEJK-Lac-AEJ |2	30994102
3637	12.9207	13.1012	3637	0.994906	17	2	3	13.0489	1105.51	1105.52	Lac-AEJK-Lac-AEJA |2	1701557
3380	12.2851	12.5387	3380	0.997637	28	2	3	12.3925	1105.52	1105.52	Lac-AEJK-Lac-AEJA |2	7232548
3933	13.8104	13.9324	3933	0.984572	15	2	3	13.865	1105.52	1105.52	Lac-AEJK-Lac-AEJA |2	1289063
3757	13.3405	13.4987	3757	0.999543	19	2	3	13.4003	1105.52	1105.52	Lac-AEJK-Lac-AEJA |2	2684744
6754	24.1054	24.2293	6754	0.982077	8	2	3	24.1685	1108.46	1108.46	Lac-AEJM-Lac-AEJA |2	102234
6588	23.2746	23.6551	6588	0.995265	33	2	3	23.464	1108.46	1108.46	Lac-AEJM-Lac-AEJA |2	256895
765	3.80288	4.2471	765	0.998322	92	2;1	3	3.96574	618.297	618.301	Lac-AEJR |1	23434566
941	4.36163	4.74825	941	0.998537	99	2;1	2	4.51269	618.298	618.301	Lac-AEJR |1	10697229
1288	5.55932	5.71114	1288	0.827693	15	2	3	5.62462	1062.48	1062.49	Lac-AEJR-Lac-AEJ |2	225897
3345	12.1679	12.5301	3345	0.998432	42	2	3	12.3163	1062.48	1062.49	Lac-AEJR-Lac-AEJ |2	30893456
3538	12.7125	12.9207	3538	0.988311	27	1;2	3	12.7728	1062.48	1062.49	Lac-AEJR-Lac-AEJ |2	6455670
3932	13.8017	13.9324	3932	0.997999	15	2	3	13.8637	1133.52	1133.52	Lac-AEJR-Lac-AEJA |2	1203566
3684	13.144	13.5179	3684	0.999569	40	2	3	13.2706	1133.52	1133.52	Lac-AEJR-Lac-AEJA |2	7909008
1375	5.80018	6.09003	1375	0.998255	36	1;2	2	5.93023	549.23	549.233	Lac-AEJS |1	1148628
1163	5.08721	5.24517	1163	0.999402	17	1	2	5.15652	549.229	549.233	Lac-AEJS |1	1343234
1207	5.31402	5.54173	1207	0.998194	24	1	2	5.41643	549.23	549.233	Lac-AEJS |1	1314630
644	3.42302	3.52997	644	0.999379	10	1	2	3.49329	549.229	549.233	Lac-AEJS |1	6719235
1077	4.7221	4.82849	1077	0.997014	13	1	2	4.76655	549.23	549.233	Lac-AEJS |1	815943
1029	4.54492	4.66776	1029	0.996507	11	1	2	4.61507	549.229	549.233	Lac-AEJS |1	367536
3553	12.7541	12.9571	3553	0.99913	40	2;1	3	12.8425	993.416	993.419	Lac-AEJS-Lac-AEJ |2	3060033
4336	14.9757	15.0104	4336	0.996989	4	2	3	14.989	993.415	993.419	Lac-AEJS-Lac-AEJ |2	265423
3851	13.5864	14.0102	3851	0.995999	72	2;1	3	13.7939	993.416	993.419	Lac-AEJS-Lac-AEJ |2	1188230
4260	14.7079	14.9224	4260	0.987571	21	1;2	3	14.8022	993.415	993.419	Lac-AEJS-Lac-AEJ |2	733895
3461	12.4758	12.6534	3461	0.987875	25	2;1	2	12.6099	993.414	993.419	Lac-AEJS-Lac-AEJ |2	857490
4170	14.5051	14.5245	4170	0.985602	3	2	3	14.5144	993.416	993.419	Lac-AEJS-Lac-AEJ |2	399995
3316	12.0985	12.4157	3316	0.999868	49	1;2	3	12.2772	993.415	993.419	Lac-AEJS-Lac-AEJ |2	12705384
3754	13.3318	13.4463	3754	0.998536	18	2;1	3	13.3903	993.416	993.419	Lac-AEJS-Lac-AEJ |2	400581
4041	14.0808	14.2183	4041	0.992994	15	2;1	3	14.146	993.414	993.419	Lac-AEJS-Lac-AEJ |2	865198
4317	14.9137	15.0541	4317	0.932896	12	2	3	14.9862	1064.45	1064.46	Lac-AEJS-Lac-AEJA |2	354926
3977	13.8976	14.0548	3977	0.984408	21	2;1	3	13.961	1064.45	1064.46	Lac-AEJS-Lac-AEJA |2	1049991
3734	13.2975	13.4812	3734	0.979742	37	1;2	3	13.3643	1064.45	1064.46	Lac-AEJS-Lac-AEJA |2	3471316
4001	13.9587	14.0893	4001	0.999499	16	1	2	14.0461	561.266	561.269	Lac-AEJV |1	2763356
3259	11.9482	12.1329	3259	0.999913	30	1	2	12.0494	561.266	561.269	Lac-AEJV |1	567412
3793	13.4289	13.8976	3793	0.999936	70	1;2	2	13.5727	561.265	561.269	Lac-AEJV |1	148061328
2592	10.0365	10.0801	2592	0.998439	4	1	2	10.0676	561.265	561.269	Lac-AEJV |1	262931
5894	20.1737	20.2666	5894	0.993973	14	2;1	3	20.2224	1005.45	1005.45	Lac-AEJV-Lac-AEJ |2	406039
5792	19.7858	20.0575	5792	0.998659	57	1;2	3	19.8987	1005.45	1005.45	Lac-AEJV-Lac-AEJ |2	26614264
6007	20.6928	20.8307	6007	0.978235	34	2;1	3	20.7429	1005.45	1005.45	Lac-AEJV-Lac-AEJ |2	5216288
6058	20.8675	21.0473	6058	0.996182	38	1;2	3	20.9701	1076.49	1076.49	Lac-AEJV-Lac-AEJA |2	3747221
6295	21.8305	21.9557	6295	0.98835	16	2;1	3	21.8816	1076.49	1076.49	Lac-AEJV-Lac-AEJA |2	487433
4751	16.3099	16.4415	4751	0.999993	14	2;1	2	16.3763	625.261	625.261	Lac-AEJY |1	1073709
4447	15.3008	15.7538	4447	0.999407	74	1;2	2	15.4492	625.26	625.261	Lac-AEJY |1	149911744
5907	20.2111	20.6071	5907	0.998187	75	1;2	3	20.3311	1069.45	1069.45	Lac-AEJY-Lac-AEJ |2	42349140
6907	25.0024	25.0614	6907	0.992867	6	2	3	25.0373	1069.45	1069.45	Lac-AEJY-Lac-AEJ |2	75914
4628	15.8619	15.9053	4628	0.940411	5	2	3	15.8887	1069.46	1069.45	Lac-AEJY-Lac-AEJ |2	246425
6490	22.7694	22.8926	6490	0.988011	12	1;2	3	22.8294	1069.45	1069.45	Lac-AEJY-Lac-AEJ |2	190259
6010	20.7185	20.9205	6010	0.997228	46	2;1	3	20.7949	1069.45	1069.45	Lac-AEJY-Lac-AEJ |2	6150929
5692	19.3833	19.4093	5692	0.993396	4	2	3	19.3953	1140.47	1140.48	Lac-AEJY-Lac-AEJA |2	198518
6286	21.7696	21.9394	6286	0.998822	17	2;1	3	21.8473	1140.48	1140.48	Lac-AEJY-Lac-AEJA |2	906405
6076	20.9205	21.4312	6076	0.999209	86	1;2	3	21.1865	1140.48	1140.48	Lac-AEJY-Lac-AEJA |2	8878507
6220	21.4839	21.7081	6220	0.996686	34	2;1	3	21.5753	1140.48	1140.48	Lac-AEJY-Lac-AEJA |2	594323
6339	22.0048	22.0894	6339	0.988113	8	2	3	22.04	1140.48	1140.48	Lac-AEJY-Lac-AEJA |2	177236
4289	14.7683	14.8374	4289	0.991426	3	1	2	14.8044	590.25	590.255	Lac-AEJ[AG]|1	302868
2171	8.69612	8.9499	2171	0.999028	33	1;2	2	8.82684	590.255	590.255	Lac-AEJ[AG]|1	5853327
816	4.02881	4.7571	816	0.99991	64	1;2	2	4.29159	590.256	590.255	Lac-AEJ[AG]|1	1539438
1740	7.48762	8.23547	1740	0.999019	77	1;2	2	7.90462	590.257	590.255	Lac-AEJ[AG]|1	1123937
2532	9.79506	9.82992	2532	0.999994	5	1	2	9.81285	632.303	632.306	Lac-AEJ[AV]|1	106568
4435	15.2748	15.3877	4435	0.997519	14	1	2	15.339	632.303	632.306	Lac-AEJ[AV]|1	677934
4361	15.0454	15.0877	4361	0.999985	6	1	2	15.0712	632.303	632.306	Lac-AEJ[AV]|1	745439
3376	12.2397	12.3728	3376	0.992085	15	2;1	3	12.3152	1020.43	1020.42	Lac-AEJ[GG]-Lac-AEJ |2	1035998
3199	11.7638	12.0527	3199	0.999113	58	2;1	3	11.8648	1020.43	1020.42	Lac-AEJ[GG]-Lac-AEJ |2	9180071
3572	12.7886	12.9399	3572	0.996842	27	1;2	3	12.8571	1091.46	1091.46	Lac-AEJ[GG]-Lac-AEJA |2	2411890
595	3.14597	3.38038	595	0.998811	42	1;2	2	3.24704	576.24	576.239	Lac-AEJ[GG]|1	5079925
3146	11.6228	11.6664	3146	0.998722	5	1	2	11.6474	576.241	576.239	Lac-AEJ[GG]|1	247009
5277	17.8138	18.3861	5277	0.999984	112	2;1	2	18.1511	575.281	575.285	Lac-AEJ[L/I] |1	232787632
5990	20.5376	20.6158	5990	0.999811	10	1	2	20.5853	575.281	575.285	Lac-AEJ[L/I] |1	1260277
6658	23.6193	25.0451	6658	0.999092	251	2;1	3	23.8319	1019.47	1019.47	Lac-AEJ[L/I]-Lac-AEJ |2	93588088
6999	25.6386	26.1419	6999	0.98208	67	2;1	3	25.8739	1090.5	1090.51	Lac-AEJ[L/I]-Lac-AEJA |2	736951
6582	23.2481	23.3353	6582	0.959403	17	2;1	3	23.2986	1090.51	1090.51	Lac-AEJ[L/I]-Lac-AEJA |2	298276
6844	24.6654	25.0789	6844	0.998199	86	2;1	3	24.8081	1090.5	1090.51	Lac-AEJ[L/I]-Lac-AEJA |2	13839424
6773	24.2934	24.3995	6773	0.999536	13	1;2	3	24.3324	1090.5	1090.51	Lac-AEJ[L/I]-Lac-AEJA |2	270147
6936	25.1975	25.3537	6936	0.995652	25	2;1	3	25.2739	1090.5	1090.51	Lac-AEJ[L/I]-Lac-AEJA |2	251576
7184	26.5485	26.6456	7184	0.994756	10	2	3	26.5964	1090.5	1090.51	Lac-AEJ[L/I]-Lac-AEJA |2	84602
1035	4.58783	4.7571	1035	0.99652	10	1	2	4.64644	462.197	462.196	Lac-AEJ|1	639378
616	3.24161	3.898	616	0.999767	70	1	2	3.39861	462.196	462.196	Lac-AEJ|1	128895000
919	4.30786	4.32517	919	0.998756	3	1	2	4.31257	462.197	462.196	Lac-AEJ|1	245566

## Sheet: M7404.2
ID	xicStart	xicEnd	feature	corrMax	ionCount	chargeOrder	maxIsotopeCount	rt	mwMonoisotopic	theo_mwMonoisotopic	inferredStructure	maxIntensity		Structure	Intensity	RT	Abundance	Oligomerisation state
8045	31.6465	31.75	8045	0.976478	6	2	3	31.7044	1421.61	1421.6	(Lac-AEJ)2-Lac-AEJA |3	47993		Lac-AEJA |1	4018483945	6.66081	0.324435	1
7207	26.54	26.78	7207	0.938742	27	2	3	26.6563	1421.61	1421.6	(Lac-AEJ)2-Lac-AEJA |3	65868		Lac-AEJF |1	593230605	20.6968	0.0478949	1
5398	17.8888	18.0627	5398	0.999516	18	2;1	3	17.9485	1421.61	1421.6	(Lac-AEJ)2-Lac-AEJA |3	11746095		Lac-AEJG |1	503534094	4.05216	0.0406532	1
7173	26.3151	26.3818	7173	0.951568	6	2	3	26.3417	1421.61	1421.6	(Lac-AEJ)2-Lac-AEJA |3	68702		Lac-AEJ[L/I] |1	208509425	18.1444	0.0168342	1
7079	25.703	26.184	7079	0.991057	46	2	3	25.9325	1421.61	1421.6	(Lac-AEJ)2-Lac-AEJA |3	75625		Lac-AEJ|1	158964778	3.40967	0.0128341	1
5951	19.9648	20.205	5951	0.983382	18	2	3	20.0698	1421.6	1421.6	(Lac-AEJ)2-Lac-AEJA |3	355957		Lac-AEJY |1	156925036	15.4579	0.0126695	1
6040	20.2872	20.3566	6040	0.847489	3	2	3	20.3292	1421.6	1421.6	(Lac-AEJ)2-Lac-AEJA |3	335517		Lac-AEJV |1	141612745	13.5771	0.0114332	1
7261	26.8768	27.3356	7261	0.987245	46	2	3	27.1011	1421.61	1421.6	(Lac-AEJ)2-Lac-AEJA |3	77205		Lac-AEJR |1	32785030	3.98092	0.00264692	1
6075	20.4084	20.4538	6075	0.979947	3	2	3	20.424	1421.6	1421.6	(Lac-AEJ)2-Lac-AEJA |3	247290		Lac-AEJAA|1	23049411	9.32035	0.00186091	1
6092	20.5503	20.6111	6092	0.966336	6	2	3	20.5812	1421.61	1421.6	(Lac-AEJ)2-Lac-AEJA |3	384682		Lac-AEJH |1	17182591	3.58405	0.00138725	1
6899	24.6337	24.7309	6899	0.932305	6	2	3	24.6941	1421.61	1421.6	(Lac-AEJ)2-Lac-AEJA |3	133724		Lac-AEJS |1	13751480	3.51004	0.00111024	1
6130	20.7651	22.5737	6130	0.756932	161	2	3	21.5408	1421.61	1421.6	(Lac-AEJ)2-Lac-AEJA |3	465602		Lac-AEJK |1	13466580	2.99962	0.00108723	1
6560	22.6885	23.4855	6560	0.959532	68	2	3	23.0615	1421.61	1421.6	(Lac-AEJ)2-Lac-AEJA |3	190407		Lac-AEJ[AG]|1	11497063	8.81925	0.000928224	1
6750	23.8746	24.5789	6750	0.981518	66	2	3	24.184	1421.61	1421.6	(Lac-AEJ)2-Lac-AEJA |3	170125		Lac-AEJ[GG]|1	6784522	3.25862	0.000547753	1
6708	23.5398	23.6832	6708	0.821314	14	2	3	23.6204	1421.61	1421.6	(Lac-AEJ)2-Lac-AEJA |3	153649		Lac-AEJ[AV]|1	1563947	15.0792	0.000126266	1
6929	24.8748	25.4511	6929	0.981873	48	2	3	25.1919	1421.61	1421.6	(Lac-AEJ)2-Lac-AEJA |3	92292		Lac-AEJ-Lac-AEJA |2	2808728963	14.3927	0.226765	2
7338	27.4167	27.5623	7338	0.984374	13	2	3	27.4972	1421.61	1421.6	(Lac-AEJ)2-Lac-AEJA |3	77105		Lac-AEJA-Lac-AEJA |2	1048640487	15.5026	0.0846628	2
5482	18.2718	19.9126	5482	0.999428	207	1;2	3	18.5029	1421.6	1421.6	(Lac-AEJ)2-Lac-AEJA |3	542668288		Lac-AEJG-Lac-AEJ |2	366103372	12.8259	0.0295576	2
7998	31.3358	31.5982	7998	0.991051	18	2	3	31.4781	1421.61	1421.6	(Lac-AEJ)2-Lac-AEJA |3	43105		Lac-AEJF-Lac-AEJ |2	217180274	25.6449	0.0175342	2
8	0.547601	1.54227	8	0.988912	119	2	3	0.882658	1421.61	1421.6	(Lac-AEJ)2-Lac-AEJA |3	258646		Lac-AEJ-JEA|2	197253280	14.3926	0.0159254	2
7974	31.2456	31.3007	7974	0.979003	5	2	3	31.2816	1421.61	1421.6	(Lac-AEJ)2-Lac-AEJA |3	34920		Lac-AEJ-Lac-AEJ |2	129193190	12.9898	0.0104305	2
7946	31.0356	31.212	7946	0.978774	14	2	3	31.1212	1421.61	1421.6	(Lac-AEJ)2-Lac-AEJA |3	38253		Lac-AEJG-Lac-AEJA |2	98795489	13.8115	0.00797633	2
7935	30.9534	30.9989	7935	0.965038	5	2	3	30.9716	1421.61	1421.6	(Lac-AEJ)2-Lac-AEJA |3	45765		Lac-AEJ[L/I]-Lac-AEJ |2	87975647	23.789	0.00710278	2
7384	27.7235	28.1897	7384	0.987851	35	2	3	27.9265	1421.6	1421.6	(Lac-AEJ)2-Lac-AEJA |3	71086		Lac-AEJF-Lac-AEJA |2	47952452	26.4613	0.00387148	2
7877	30.6074	30.6756	7877	0.994101	3	2	3	30.6424	1421.6	1421.6	(Lac-AEJ)2-Lac-AEJA |3	34447		Lac-AEJY-Lac-AEJ |2	46707039	20.3371	0.00377093	2
7842	30.371	30.4917	7842	0.989365	7	2	3	30.4348	1421.61	1421.6	(Lac-AEJ)2-Lac-AEJA |3	49728		Lac-AEJK-Lac-AEJ |2	37164343	11.3624	0.00300049	2
7741	29.7702	29.9187	7741	0.975884	11	2	3	29.8467	1421.61	1421.6	(Lac-AEJ)2-Lac-AEJA |3	46948		Lac-AEJR-Lac-AEJ |2	34304948	12.3144	0.00276964	2
7888	30.7335	30.8477	7888	0.980709	10	2	3	30.7827	1421.61	1421.6	(Lac-AEJ)2-Lac-AEJA |3	42133		Lac-AEJV-Lac-AEJ |2	32307870	19.8995	0.0026084	2
7503	28.3847	28.7159	7503	0.964041	31	2	3	28.5523	1421.61	1421.6	(Lac-AEJ)2-Lac-AEJA |3	62178		Lac-AEJS-Lac-AEJ |2	20495820	12.2698	0.00165475	2
7676	29.3758	29.6612	7676	0.932023	14	2	3	29.541	1421.61	1421.6	(Lac-AEJ)2-Lac-AEJA |3	56482		Lac-AEJH-Lac-AEJ |2	20066466	11.6831	0.00162008	2
7630	29.154	29.2508	7630	0.989526	9	2	3	29.198	1421.61	1421.6	(Lac-AEJ)2-Lac-AEJA |3	56213		Lac-AEJ[L/I]-Lac-AEJA |2	13745235	24.8159	0.00110973	2
7586	28.8406	29.1036	7586	0.913642	24	2	3	28.9764	1421.61	1421.6	(Lac-AEJ)2-Lac-AEJA |3	55000		Lac-AEJK-Lac-AEJA |2	12972975	12.3872	0.00104738	2
6680	23.4051	23.5398	6680	0.857298	11	2	4	23.4658	1407.58	1407.59	(Lac-AEJ)2-Lac-AEJG |3	194640		Lac-AEJ[GG]-Lac-AEJ |2	11258022	11.8573	0.000908925	2
5368	17.7734	17.8802	5368	0.980257	6	2	3	17.8242	1407.59	1407.59	(Lac-AEJ)2-Lac-AEJG |3	188223		Lac-AEJR-Lac-AEJA |2	9605201	13.2791	0.000775483	2
4966	16.665	17.5527	4966	0.999241	113	2;1	3	16.828	1407.59	1407.59	(Lac-AEJ)2-Lac-AEJG |3	100589280		Lac-AEJY-Lac-AEJA |2	9153596	21.1806	0.000739022	2
6486	22.3876	22.5561	6486	0.975709	20	2	3	22.4653	1407.58	1407.59	(Lac-AEJ)2-Lac-AEJG |3	424759		Lac-AEJS-Lac-AEJA |2	4728037	13.3722	0.000381722	2
6406	21.9439	22.0566	6406	0.979632	15	2	3	22.0038	1407.58	1407.59	(Lac-AEJ)2-Lac-AEJG |3	256190		Lac-AEJH-Lac-AEJA |2	4602449	12.659	0.000371582	2
6837	24.2782	24.4185	6837	0.993472	14	2	3	24.3445	1407.58	1407.59	(Lac-AEJ)2-Lac-AEJG |3	116650		Lac-AEJV-Lac-AEJA |2	4434879	20.973	0.000358053	2
6358	21.7127	21.8257	6358	0.998783	13	2	3	21.7771	1407.58	1407.59	(Lac-AEJ)2-Lac-AEJG |3	582350		Lac-AEJAA-Lac-AEJA |2	3650045	16.3199	0.000294689	2
5275	17.4718	17.7189	5275	0.995534	25	2	3	17.6103	1350.57	1350.57	(Lac-AEJ)3 |3	1550755		Lac-AEJ[GG]-Lac-AEJA |2	2488889	12.8545	0.000200942	2
5100	17.0003	17.3733	5100	0.998608	54	2;1	3	17.1346	1350.57	1350.57	(Lac-AEJ)3 |3	26074124		Lac-AEJM-Lac-AEJA |2	273030	23.4782	2.20433e-05	2
7105	25.8686	26.0796	7105	0.843077	19	2	4	25.9639	1851.76	1851.77	(Lac-AEJ)3-Lac-AEJG |4	73625		(Lac-AEJ)2-Lac-AEJA |3	558251030	18.5029	0.0450708	3
7215	26.5733	26.6435	7215	0.911408	6	2	4	26.6063	1851.77	1851.77	(Lac-AEJ)3-Lac-AEJG |4	38714		(Lac-AEJA)2-LacAEJ |3	321591115	19.362	0.0259639	3
6839	24.2868	24.4542	6839	0.981437	20	2	3	24.3681	1851.77	1851.77	(Lac-AEJ)3-Lac-AEJG |4	320008		(Lac-AEJ)2-Lac-AEJG |3	102352092	16.828	0.00826347	3
5850	19.5431	19.8696	5850	0.981381	60	2;3	3	19.7304	1851.78	1851.77	(Lac-AEJ)3-Lac-AEJG |4	4147137		(Lac-AEJA)3 |3	61884048	20.1336	0.00499625	3
6998	25.2174	25.2955	6998	0.977838	7	2	3	25.2477	1851.77	1851.77	(Lac-AEJ)3-Lac-AEJG |4	65725		Lac-AEJA-LacAEJG-LacAEJ |3	41761967	17.7178	0.00337168	3
5944	19.9648	20.0183	5944	0.830499	7	2	3	19.9917	1851.78	1851.77	(Lac-AEJ)3-Lac-AEJG |4	437357		(Lac-AEJ)3 |3	27624879	17.1346	0.00223032	3
5934	19.9126	20.1164	5934	0.982428	22	2	3	20.0153	1794.75	1794.75	(Lac-AEJ)4 |4	1743734		(Lac-AEJA)2-LacAEJG |3	9475302	18.4246	0.000764996	3
6244	21.2181	21.3343	6244	0.958905	18	2;3	3	21.2859	1936.84	1936.83	(Lac-AEJA)2-(Lac-AEJ)2 |4	310991		(Lac-AEJG)2-LacAEJ |3	1654813	16.029	0.000133603	3
17	0.558013	0.571773	17	0.987989	3	2	3	0.564586	1936.83	1936.83	(Lac-AEJA)2-(Lac-AEJ)2 |4	33278		(Lac-AEJG)2-LacAEJA |3	1065088	16.7978	8.59907e-05	3
6543	22.6695	23.0322	6543	0.968898	20	2;3	3	22.8076	1936.83	1936.83	(Lac-AEJA)2-(Lac-AEJ)2 |4	137040		(Lac-AEJG)3 |3	89294	7.9418	7.20922e-06	3
6317	21.55	22.5382	6317	0.994149	220	2;3	3	21.8469	1936.83	1936.83	(Lac-AEJA)2-(Lac-AEJ)2 |4	25841926		Lac-AEJA-(Lac-AEJ)3 |4	30669421	21.1462	0.00247612	4
6688	23.4411	24.088	6688	0.94169	129	3;2	4	23.7195	2381.01	2381.01	(Lac-AEJA)2-(Lac-AEJ)3 |5	2455446		(Lac-AEJA)2-(Lac-AEJ)2 |4	26323235	21.8469	0.00212523	4
6649	23.2197	23.2747	6649	0.963975	3	3	3	23.2472	2381.03	2381.01	(Lac-AEJA)2-(Lac-AEJ)3 |5	74501		(Lac-AEJA)3-Lac-AEJ |4	8492846	22.5144	0.000685676	4
6156	20.8712	21.1209	6156	0.973089	52	2;3	3	20.9977	1993.85	1993.85	(Lac-AEJA)2-Lac-AEJ-Lac-AEJG |4	857144		(Lac-AEJ)3-Lac-AEJG |4	5082566	19.7304	0.000410345	4
6247	21.2268	21.4238	6247	0.930631	36	3;2	3	21.3082	1993.85	1993.85	(Lac-AEJA)2-Lac-AEJ-Lac-AEJG |4	293803		Lac-AEJA-(Lac-AEJ)2-Lac-AEJG |4	4281312	20.3718	0.000345655	4
6222	21.1035	21.2009	6222	0.917778	4	2	3	21.1508	1492.64	1492.64	(Lac-AEJA)2-LacAEJ |3	238791		(Lac-AEJA)4 |4	3342362	22.9465	0.000269848	4
6830	24.2427	24.2782	6830	0.994372	3	2	3	24.258	1492.65	1492.64	(Lac-AEJA)2-LacAEJ |3	56688		(Lac-AEJ)4 |4	1743734	20.0153	0.000140782	4
6338	21.6312	21.7474	6338	0.978887	9	2	3	21.6817	1492.64	1492.64	(Lac-AEJA)2-LacAEJ |3	298512		(Lac-AEJA)2-Lac-AEJ-Lac-AEJG |4	1150947	20.9977	9.29226e-05	4
6374	21.7996	21.9915	6374	0.95342	14	2	3	21.904	1492.64	1492.64	(Lac-AEJA)2-LacAEJ |3	243608		(Lac-AEJA)3-Lac-AEJG |4	311803	21.6097	2.51736e-05	4
6758	23.9272	24.1342	6758	0.974099	15	2	3	24.037	1492.65	1492.64	(Lac-AEJA)2-LacAEJ |3	76845		(Lac-AEJG)4 |4	79441	24.0199	6.41373e-06	4
6951	24.9475	25.389	6951	0.960849	28	2	3	25.1658	1492.64	1492.64	(Lac-AEJA)2-LacAEJ |3	58812		(Lac-AEJA)2-(Lac-AEJ)3 |5	2529947	23.7195	0.000204257	5
6435	22.0655	22.2632	6435	0.954308	12	2	3	22.157	1492.64	1492.64	(Lac-AEJA)2-LacAEJ |3	166954		Lac-AEJA-(Lac-AEJ)4 |5	1904681	23.1128	0.000153776	5
7220	26.5486	26.7038	7220	0.990733	11	2	3	26.6397	1492.65	1492.64	(Lac-AEJA)2-LacAEJ |3	45715		(Lac-AEJA)3-(Lac-AEJ)2 |5	1556175	24.2659	0.000125639	5
6163	20.8801	21.0339	6163	0.94225	12	2	3	20.9507	1492.64	1492.64	(Lac-AEJA)2-LacAEJ |3	225726		(Lac-AEJA)4-Lac-AEJ |5	1285651	24.6352	0.000103798	5
6491	22.4143	22.5205	6491	0.974922	8	2	3	22.4574	1492.64	1492.64	(Lac-AEJA)2-LacAEJ |3	145512		(Lac-AEJA)5 |5	461457	25.073	3.72561e-05	5
7130	25.976	26.0796	7130	0.992392	5	2	3	26.0294	1492.64	1492.64	(Lac-AEJA)2-LacAEJ |3	38444
7082	25.7191	25.8265	7082	0.961205	7	2	3	25.7758	1492.65	1492.64	(Lac-AEJA)2-LacAEJ |3	41496		Sum intensity	12386088456
6577	22.759	22.8777	6577	0.996586	8	2	3	22.8227	1492.64	1492.64	(Lac-AEJA)2-LacAEJ |3	99003
7186	26.3223	26.3639	7186	0.988039	3	2	3	26.3429	1492.65	1492.64	(Lac-AEJA)2-LacAEJ |3	48768
7111	25.8793	25.9235	7111	0.97491	4	2	3	25.9066	1492.65	1492.64	(Lac-AEJA)2-LacAEJ |3	39958
5719	19.0444	20.6111	5719	0.998348	217	2;1	3	19.362	1492.64	1492.64	(Lac-AEJA)2-LacAEJ |3	317757024
21	0.558013	0.64496	21	0.985683	11	2	3	0.584034	1492.65	1492.64	(Lac-AEJA)2-LacAEJ |3	115744
49	0.68905	0.768747	49	0.924678	4	2	3	0.726881	1492.64	1492.64	(Lac-AEJA)2-LacAEJ |3	19599
5576	18.6178	18.7248	5576	0.962403	13	2	3	18.6786	1492.64	1492.64	(Lac-AEJA)2-LacAEJ |3	1873916
5673	18.8941	18.9987	5673	0.99627	12	2	3	18.9475	1549.66	1549.66	(Lac-AEJA)2-LacAEJG |3	739546
5514	18.3331	18.4807	5514	0.976783	18	2	3	18.4246	1549.66	1549.66	(Lac-AEJA)2-LacAEJG |3	6969706
5593	18.6615	18.8315	5593	0.998022	19	2	3	18.7467	1549.67	1549.66	(Lac-AEJA)2-LacAEJG |3	1766050
5917	19.7914	20.6111	5917	0.997219	109	2;1;3	3	20.1336	1563.68	1563.68	(Lac-AEJA)3 |3	58940164
6117	20.748	20.9442	6117	0.990803	22	2	3	20.8341	1563.68	1563.68	(Lac-AEJA)3 |3	2943884
6775	23.9786	24.7483	6775	0.993628	140	2;3	5	24.2659	2452.05	2452.05	(Lac-AEJA)3-(Lac-AEJ)2 |5	1556175
6469	22.2369	23.1579	6469	0.980396	187	3;2	3	22.5144	2007.87	2007.86	(Lac-AEJA)3-Lac-AEJ |4	8416786
6659	23.2658	23.365	6659	0.990873	5	3;2	4	23.3156	2007.87	2007.86	(Lac-AEJA)3-Lac-AEJ |4	76060
7069	25.6857	25.7999	7069	0.76643	15	3;2	4	25.7266	2064.87	2064.89	(Lac-AEJA)3-Lac-AEJG |4	78766
6323	21.5589	21.658	6323	0.996052	21	2;3	3	21.6097	2064.89	2064.89	(Lac-AEJA)3-Lac-AEJG |4	233037
6697	23.5398	23.6476	6697	0.99838	20	2;3	4	23.5844	2078.9	2078.9	(Lac-AEJA)4 |4	237662
6637	23.1845	23.3964	6637	0.986936	45	3;2	4	23.2705	2078.91	2078.9	(Lac-AEJA)4 |4	1040175
6585	22.8511	23.0586	6585	0.959768	47	2;3	3	22.9465	2078.9	2078.9	(Lac-AEJA)4 |4	2064525
6923	24.8202	25.2067	6923	0.983787	49	3;2	5	24.9307	2523.09	2523.09	(Lac-AEJA)4-Lac-AEJ |5	426894
1656	7.35373	7.42302	1656	0.835904	7	6	3	7.394	2523.1	2523.09	(Lac-AEJA)4-Lac-AEJ |5	79955
6878	24.5254	24.7396	6878	0.943801	44	2;3	5	24.6352	2523.09	2523.09	(Lac-AEJA)4-Lac-AEJ |5	778802
6963	25.008	25.1485	6963	0.966051	26	3;2	5	25.073	2594.13	2594.12	(Lac-AEJA)5 |5	335958
7010	25.2677	25.389	7010	0.967333	17	3	5	25.3252	2594.12	2594.12	(Lac-AEJA)5 |5	125499
4722	15.92	16.1435	4722	0.998695	26	2	3	16.029	1464.61	1464.61	(Lac-AEJG)2-LacAEJ |3	1654813
5007	16.7366	16.8759	5007	0.964384	15	2	3	16.7978	1535.65	1535.65	(Lac-AEJG)2-LacAEJA |3	1065088
1842	7.91376	7.99397	1842	0.906925	5	3	3	7.9418	1521.63	1521.63	(Lac-AEJG)3 |3	89294
6777	23.9448	24.0791	6777	0.934367	12	3	4	24.0199	2022.85	2022.84	(Lac-AEJG)4 |4	79441
4421	15.0661	15.3009	4421	0.996879	46	2;1	3	15.1636	834.36	834.36	Lac-AEJ-JEA|2	44281104
4075	14.0154	14.1198	4075	0.985102	10	2	3	14.0702	834.361	834.36	Lac-AEJ-JEA|2	1092844
1902	8.06546	8.42776	1902	0.998862	65	1;2	3	8.22351	834.362	834.36	Lac-AEJ-JEA|2	16224257
2347	9.32366	9.98847	2347	0.999001	112	2;1	3	9.53636	834.361	834.36	Lac-AEJ-JEA|2	50492936
2161	8.7432	8.76947	2161	0.991175	3	2	3	8.75543	834.361	834.36	Lac-AEJ-JEA|2	269342
2189	8.88265	8.92574	2189	0.996531	6	2	3	8.90286	834.361	834.36	Lac-AEJ-JEA|2	697760
2272	9.07279	9.27165	2272	0.999422	33	1;2	3	9.16768	834.361	834.36	Lac-AEJ-JEA|2	4788559
1557	7.05482	7.54423	1557	0.997328	53	1;2	3	7.30204	834.36	834.36	Lac-AEJ-JEA|2	551871
4166	14.2835	14.7553	4166	0.999159	67	2;1	3	14.3926	834.361	834.36	Lac-AEJ-JEA|2	51564596
2753	10.3671	10.6962	2753	0.999668	50	2;1	3	10.5527	834.361	834.36	Lac-AEJ-JEA|2	26436722
1522	6.86214	7.00111	1522	0.985953	10	2	3	6.96217	834.361	834.36	Lac-AEJ-JEA|2	853289
3660	12.8822	13.216	3660	0.997364	68	2;1	3	12.9898	906.382	906.382	Lac-AEJ-Lac-AEJ |2	111834120
3862	13.449	13.6499	3862	0.999864	45	1;2	3	13.5444	906.382	906.382	Lac-AEJ-Lac-AEJ |2	17359070
5053	16.8759	17.9581	5053	0.989733	152	2;1	2	17.3371	977.419	977.419	Lac-AEJ-Lac-AEJA |2	559894
5477	18.2451	18.3612	5477	0.999553	8	2;1	3	18.2952	977.419	977.419	Lac-AEJ-Lac-AEJA |2	364615
4819	16.2962	16.8237	4819	0.999137	93	2;1	2	16.5373	977.419	977.419	Lac-AEJ-Lac-AEJA |2	869816
4782	16.0632	16.1954	4782	0.989442	28	1;2	3	16.137	977.419	977.419	Lac-AEJ-Lac-AEJA |2	945065
4368	14.9187	16.009	4368	0.999228	244	2;1	2	15.1699	977.419	977.419	Lac-AEJ-Lac-AEJA |2	1009532544
5557	18.5652	18.7791	5557	0.987782	13	2;1	2	18.6594	977.418	977.419	Lac-AEJ-Lac-AEJA |2	273825
5424	18.0193	18.1413	5424	0.995117	14	1;2	3	18.0822	977.42	977.419	Lac-AEJ-Lac-AEJA |2	363735
5	0.547601	1.39313	5	0.997769	116	2;1	2	0.820351	977.421	977.419	Lac-AEJ-Lac-AEJA |2	349034
4156	14.2577	14.8594	4156	0.998972	140	2;1	2	14.3927	977.419	977.419	Lac-AEJ-Lac-AEJA |2	1772199168
109	1.4305	1.53038	109	0.992098	7	2	2	1.48287	977.42	977.419	Lac-AEJ-Lac-AEJA |2	29749
4085	14.0411	14.1717	4085	0.99678	31	1;2	3	14.0808	977.42	977.419	Lac-AEJ-Lac-AEJA |2	23241518
3083	11.4212	11.499	3083	0.999592	7	1	2	11.4474	533.234	533.233	Lac-AEJA |1	393482
2898	10.8685	11.1073	2898	0.99862	23	1	2	10.9588	533.234	533.233	Lac-AEJA |1	1580833
3458	12.4306	12.6249	3458	0.998245	19	1	2	12.5294	533.232	533.233	Lac-AEJA |1	245296
3190	11.6507	11.6961	3190	0.996541	4	1	2	11.6779	533.234	533.233	Lac-AEJA |1	257665
2629	10.1713	10.4571	2629	0.991969	30	1	2	10.3071	533.234	533.233	Lac-AEJA |1	677193
2395	9.45268	10.0857	2395	0.997872	68	1	2	9.74028	533.235	533.233	Lac-AEJA |1	910324
2854	10.6768	10.7134	2854	0.999434	4	1	2	10.6949	533.236	533.233	Lac-AEJA |1	482494
3618	12.7932	12.9451	3618	1	12	1	2	12.8738	533.234	533.233	Lac-AEJA |1	280185
1375	6.03787	6.38234	1375	0.999521	47	1;2	2	6.36483	533.233	533.233	Lac-AEJA |1	1877970176
1165	5.46459	5.56893	1165	0.999156	10	1	2	5.51477	533.234	533.233	Lac-AEJA |1	81173
995	4.73593	4.90043	995	0.993148	19	1	2	4.82555	533.234	533.233	Lac-AEJA |1	303572
3361	12.1337	12.3358	3361	0.99082	13	1	2	12.2148	533.235	533.233	Lac-AEJA |1	201868
3221	11.7996	12.0098	3221	0.997935	13	1	2	11.9104	533.235	533.233	Lac-AEJA |1	301092
1443	6.55858	9.22027	1443	0.999739	365	2;1	2	6.66081	533.234	533.233	Lac-AEJA |1	2134798592
6108	20.7055	20.8258	6108	0.76156	12	2	3	20.7567	1922.81	1922.81	Lac-AEJA-(Lac-AEJ)2-Lac-AEJG |4	785323
6007	20.1872	20.6111	6007	0.995579	82	2;3	3	20.3718	1922.81	1922.81	Lac-AEJA-(Lac-AEJ)2-Lac-AEJG |4	3495989
6093	20.5326	20.6798	6093	0.899667	12	2	4	20.6261	1865.8	1865.79	Lac-AEJA-(Lac-AEJ)3 |4	988090
6183	20.9529	21.55	6183	0.990268	128	2;3	3	21.1462	1865.79	1865.79	Lac-AEJA-(Lac-AEJ)3 |4	29316290
14	0.558013	0.571773	14	0.992099	3	2	3	0.564901	1865.79	1865.79	Lac-AEJA-(Lac-AEJ)3 |4	32625
6414	21.9915	22.0459	6414	0.829845	4	2	3	22.018	1865.79	1865.79	Lac-AEJA-(Lac-AEJ)3 |4	102498
6375	21.7909	21.8974	6375	0.859099	9	2	4	21.8404	1865.78	1865.79	Lac-AEJA-(Lac-AEJ)3 |4	229918
6613	22.977	23.3189	6613	0.987241	69	3;2	5	23.1128	2309.98	2309.98	Lac-AEJA-(Lac-AEJ)4 |5	1904681
5193	17.2489	17.5614	5193	0.991187	18	2;1	3	17.3902	1048.46	1048.46	Lac-AEJA-Lac-AEJA |2	291868
4736	15.9742	17.0983	4736	0.998754	202	2;1	3	16.2482	1048.46	1048.46	Lac-AEJA-Lac-AEJA |2	432051712
10	0.558013	0.562469	10	0.982379	4	1;2	3	0.560376	1048.47	1048.46	Lac-AEJA-Lac-AEJA |2	86432
4511	15.3359	15.8679	4511	0.996928	120	2;1	3	15.5026	1048.46	1048.46	Lac-AEJA-Lac-AEJA |2	616002880
5369	17.7276	17.8437	5369	0.996312	4	2	3	17.792	1048.46	1048.46	Lac-AEJA-Lac-AEJA |2	207595
5705	19.0268	19.0711	5705	0.93314	5	2	3	19.0507	1478.63	1478.63	Lac-AEJA-LacAEJG-LacAEJ |3	180716
5675	18.9202	18.9635	5675	0.985015	5	2	3	18.9409	1478.63	1478.63	Lac-AEJA-LacAEJG-LacAEJ |3	233430
5571	18.6091	18.6352	5571	0.996061	4	2	3	18.6233	1478.63	1478.63	Lac-AEJA-LacAEJG-LacAEJ |3	255829
5271	17.5174	18.4046	5271	0.9967	112	2;1	3	17.7178	1478.63	1478.63	Lac-AEJA-LacAEJG-LacAEJ |3	41091992
4901	16.4802	16.5584	4901	0.960859	9	2	3	16.5218	1119.5	1119.49	Lac-AEJAA-Lac-AEJA |2	492409
4823	16.2793	16.3843	4823	0.991708	13	2	3	16.3199	1119.49	1119.49	Lac-AEJAA-Lac-AEJA |2	2559548
5087	16.9653	17.0461	5087	0.995928	9	2	3	17.0121	1119.49	1119.49	Lac-AEJAA-Lac-AEJA |2	598088
2837	10.6252	10.8427	2837	0.999676	26	1	2	10.7451	604.271	604.27	Lac-AEJAA|1	7692950
2729	10.3581	10.4834	2729	0.998045	11	1	2	10.3997	604.272	604.27	Lac-AEJAA|1	632644
2195	8.92574	9.13372	2195	0.999031	39	1;2	2	9.01847	604.271	604.27	Lac-AEJAA|1	2988638
2328	9.21159	9.44398	2328	0.999979	28	1	2	9.32035	604.271	604.27	Lac-AEJAA|1	11735179
6438	22.0922	22.379	6438	0.999963	42	1;2	2	22.251	609.265	609.269	Lac-AEJF |1	5833669
6059	20.4363	21.1562	6059	0.99925	116	1;2	2	20.6968	609.265	609.269	Lac-AEJF |1	587064832
6232	21.2094	21.55	6232	1	22	1	2	21.3668	609.266	609.269	Lac-AEJF |1	332104
7436	27.9606	27.9782	7436	0.895842	3	2;1	3	27.9671	1053.45	1053.45	Lac-AEJF-Lac-AEJ |2	34448
7450	28.0993	28.1537	7450	0.99065	7	2;1	2	28.1273	1053.45	1053.45	Lac-AEJF-Lac-AEJ |2	40632
7031	25.389	27.3445	7031	0.999614	426	1;2	3	25.6449	1053.45	1053.45	Lac-AEJF-Lac-AEJ |2	216886240
7345	27.4256	27.6215	7345	0.969328	13	1;2	3	27.53	1053.45	1053.45	Lac-AEJF-Lac-AEJ |2	95443
7419	27.868	27.9095	7419	0.966151	5	1;2	3	27.8882	1053.45	1053.45	Lac-AEJF-Lac-AEJ |2	49244
7382	27.6887	27.7397	7382	0.999496	4	2;1	3	27.708	1053.45	1053.45	Lac-AEJF-Lac-AEJ |2	74267
7166	26.2978	26.7425	7166	0.998557	106	1;2	3	26.4613	1124.49	1124.49	Lac-AEJF-Lac-AEJA |2	36574668
7258	26.8414	27.0915	7258	0.964589	18	2	3	26.9898	1124.49	1124.49	Lac-AEJF-Lac-AEJA |2	85699
7124	26.0084	26.184	7124	0.99747	33	2;1	3	26.1048	1124.49	1124.49	Lac-AEJF-Lac-AEJA |2	539322
7564	28.7511	28.9321	7564	0.996614	40	1;2	3	28.8387	1124.49	1124.49	Lac-AEJF-Lac-AEJA |2	480330
7045	25.4333	25.703	7045	0.996967	37	2;1	3	25.5457	1124.49	1124.49	Lac-AEJF-Lac-AEJA |2	4822501
7446	27.9945	28.0993	7446	0.969968	7	2	3	28.0602	1124.49	1124.49	Lac-AEJF-Lac-AEJA |2	67266
7395	27.7486	27.8767	7395	0.955374	14	2	3	27.8172	1124.49	1124.49	Lac-AEJF-Lac-AEJA |2	113965
7305	27.1944	27.6729	7305	0.997137	100	2;1	3	27.4002	1124.49	1124.49	Lac-AEJF-Lac-AEJA |2	3191985
7479	28.2338	28.4928	7479	0.999891	50	1;2	3	28.3412	1124.49	1124.49	Lac-AEJF-Lac-AEJA |2	2076716
2267	9.04702	9.09878	2267	0.998444	4	1	2	9.07106	519.221	519.218	Lac-AEJG |1	113228
711	3.8435	4.97757	711	0.999873	173	2;1	2	4.05216	519.218	519.218	Lac-AEJG |1	500757920
1149	5.43029	5.68585	1149	0.999558	26	1	2	5.5387	519.219	519.218	Lac-AEJG |1	819355
3570	12.6748	12.7171	3570	0.922399	3	1	2	12.692	519.219	519.218	Lac-AEJG |1	1390867
1331	5.89715	6.198	1331	0.996735	33	1	2	6.05007	519.219	519.218	Lac-AEJG |1	383020
1433	6.25878	6.29567	1433	0.963313	3	1	2	6.27907	519.221	519.218	Lac-AEJG |1	69704
3537	12.5711	13.7011	3537	0.9981	207	2;1	3	12.8259	963.404	963.403	Lac-AEJG-Lac-AEJ |2	365680128
3975	13.7523	13.9064	3975	0.977965	10	2	3	13.8334	963.404	963.403	Lac-AEJG-Lac-AEJ |2	365874
24	0.558013	0.562469	24	0.999782	3	1;2	2	0.560209	963.405	963.403	Lac-AEJG-Lac-AEJ |2	57370
4242	14.5632	14.8507	4242	0.998008	43	2;1	3	14.6897	1034.44	1034.44	Lac-AEJG-Lac-AEJA |2	2019159
4509	15.3272	15.4046	4509	0.978743	11	2;1	3	15.37	1034.44	1034.44	Lac-AEJG-Lac-AEJA |2	680227
4160	14.2835	14.3839	4160	0.97622	23	1;2	3	14.3469	1034.44	1034.44	Lac-AEJG-Lac-AEJA |2	12414590
3463	12.4564	12.6078	3463	0.999807	21	2;1	3	12.5159	1034.44	1034.44	Lac-AEJG-Lac-AEJA |2	1472905
3936	13.6499	14.0326	3936	0.999239	70	1;2	3	13.8115	1034.44	1034.44	Lac-AEJG-Lac-AEJA |2	82208608
547	3.15865	3.32307	547	0.998533	31	2;1	3	3.22917	599.255	599.26	Lac-AEJH |1	6143546
600	3.46028	3.81774	600	0.997808	66	2;1	3	3.58405	599.255	599.26	Lac-AEJH |1	11039045
3166	11.6073	11.748	3166	0.999859	21	2;1	3	11.6831	1043.44	1043.45	Lac-AEJH-Lac-AEJ |2	12427560
3301	11.9751	12.0991	3301	0.999169	13	2	3	12.0394	1043.44	1043.45	Lac-AEJH-Lac-AEJ |2	1025861
3044	11.3073	11.4817	3044	0.999971	21	2	3	11.3856	1043.44	1043.45	Lac-AEJH-Lac-AEJ |2	6613045
3556	12.6078	12.7086	3556	0.997032	11	2	3	12.659	1114.48	1114.48	Lac-AEJH-Lac-AEJA |2	3256506
3419	12.3011	12.5537	3419	0.992423	22	2	3	12.3983	1114.48	1114.48	Lac-AEJH-Lac-AEJA |2	1345943
455	2.86264	3.28893	455	0.99474	99	1;2	3	2.99962	590.291	590.296	Lac-AEJK |1	13466580
3233	11.8345	12.0358	3233	0.999578	23	2	3	11.9177	1034.48	1034.48	Lac-AEJK-Lac-AEJ |2	6193719
3028	11.2554	11.5358	3028	0.998672	47	2;1	3	11.3624	1034.48	1034.48	Lac-AEJK-Lac-AEJ |2	30970624
3997	13.8371	13.9345	3997	0.992541	12	2	3	13.8829	1105.52	1105.52	Lac-AEJK-Lac-AEJA |2	1028278
3810	13.3432	13.5098	3810	0.999004	18	2	3	13.4075	1105.52	1105.52	Lac-AEJK-Lac-AEJA |2	3059134
3402	12.2925	12.519	3402	0.99266	27	2	3	12.3872	1105.51	1105.52	Lac-AEJK-Lac-AEJA |2	7272025
3695	12.9536	13.1148	3695	0.992978	12	2	3	13.0602	1105.51	1105.52	Lac-AEJK-Lac-AEJA |2	1613538
6661	23.2924	23.6387	6661	0.993212	26	2	3	23.4782	1108.46	1108.46	Lac-AEJM-Lac-AEJA |2	273030
872	4.37755	4.76203	872	0.998819	98	1;2	3	4.52882	618.297	618.301	Lac-AEJR |1	11410062
707	3.81774	4.28897	707	0.997806	93	2;1	2	3.98092	618.297	618.301	Lac-AEJR |1	21374968
3357	12.1688	12.5277	3357	0.997326	42	2	3	12.3144	1062.48	1062.49	Lac-AEJR-Lac-AEJ |2	28795520
3571	12.7086	12.9169	3571	0.991101	27	2;1	3	12.775	1062.48	1062.49	Lac-AEJR-Lac-AEJ |2	5509428
3732	13.1568	13.5292	3732	0.997246	41	2	3	13.2791	1133.52	1133.52	Lac-AEJR-Lac-AEJA |2	8470992
3993	13.8284	13.9432	3993	0.992578	14	2	3	13.8811	1133.52	1133.52	Lac-AEJR-Lac-AEJA |2	1134209
735	3.8975	3.92348	735	0.999391	3	1	3	3.9111	549.228	549.233	Lac-AEJS |1	85481
656	3.63541	3.71245	656	0.923834	7	1	2	3.66852	549.229	549.233	Lac-AEJS |1	299849
935	4.52655	4.84867	935	0.998762	30	1	2	4.74481	549.23	549.233	Lac-AEJS |1	967535
1293	5.81781	6.07249	1293	0.998902	30	1;2	2	5.94088	549.229	549.233	Lac-AEJS |1	1294545
1071	5.1068	5.2377	1071	0.999865	16	1	2	5.16842	549.229	549.233	Lac-AEJS |1	1570008
1128	5.3508	5.5079	1128	0.998961	11	1	2	5.41349	549.23	549.233	Lac-AEJS |1	1483338
592	3.42595	3.54759	592	0.999676	11	1	2	3.51004	549.229	549.233	Lac-AEJS |1	8050724
4336	14.8156	15.0053	4336	0.966264	16	1;2	3	14.9159	993.414	993.419	Lac-AEJS-Lac-AEJ |2	392809
3340	12.1077	12.4738	3340	0.998781	52	1;2	3	12.2698	993.415	993.419	Lac-AEJS-Lac-AEJ |2	12501730
4305	14.7379	14.7639	4305	0.994021	4	2	3	14.7537	993.416	993.419	Lac-AEJS-Lac-AEJ |2	655132
3590	12.742	12.9622	3590	0.999945	41	2;1	3	12.8375	993.415	993.419	Lac-AEJS-Lac-AEJ |2	3067385
4232	14.5284	14.5458	4232	0.963743	3	2	3	14.5368	993.416	993.419	Lac-AEJS-Lac-AEJ |2	249799
4102	14.0925	14.2232	4102	0.999914	19	2;1	3	14.1648	993.415	993.419	Lac-AEJS-Lac-AEJ |2	1142482
3518	12.5364	12.6417	3518	0.962147	20	2;1	3	12.6068	993.414	993.419	Lac-AEJS-Lac-AEJ |2	808508
3914	13.5982	14.0326	3914	0.980257	67	1;2	3	13.8009	993.415	993.419	Lac-AEJS-Lac-AEJ |2	1152868
3796	13.3093	13.4577	3796	0.999049	18	1;2	3	13.3877	993.416	993.419	Lac-AEJS-Lac-AEJ |2	525107
4389	14.9706	15.0488	4389	0.877598	8	2	3	15.0159	1064.45	1064.46	Lac-AEJS-Lac-AEJA |2	318180
3793	13.3006	13.5098	3793	0.991122	40	1;2	3	13.3722	1064.45	1064.46	Lac-AEJS-Lac-AEJA |2	3418177
4025	13.8892	14.0755	4025	0.980486	22	2;1	3	13.9776	1064.45	1064.46	Lac-AEJS-Lac-AEJA |2	991680
3852	13.4227	13.7772	3852	0.999999	58	1;2	2	13.5771	561.265	561.269	Lac-AEJV |1	138133904
3210	11.7567	12.1688	3210	0.999441	50	1	2	11.99	561.266	561.269	Lac-AEJV |1	582610
4060	13.9696	14.1028	4060	0.999316	16	1	2	14.0584	561.265	561.269	Lac-AEJV |1	2560222
2594	10.0337	10.0597	2594	0.983206	4	1	2	10.0491	561.265	561.269	Lac-AEJV |1	195030
4014	13.8803	13.915	4014	0.999234	4	1	2	13.8977	561.265	561.269	Lac-AEJV |1	140979
6000	20.1783	20.2693	6000	0.993493	14	1;2	3	20.2264	1005.45	1005.45	Lac-AEJV-Lac-AEJ |2	358614
6107	20.6798	20.8431	6107	0.992458	34	1;2	3	20.7504	1005.45	1005.45	Lac-AEJV-Lac-AEJ |2	4292002
5229	17.382	17.4453	5229	0.978618	5	2	3	17.414	1005.45	1005.45	Lac-AEJV-Lac-AEJ |2	225486
5906	19.7827	20.0357	5906	0.995879	57	2;1	3	19.8995	1005.45	1005.45	Lac-AEJV-Lac-AEJ |2	27431768
6372	21.8083	21.9242	6372	0.999198	20	2;1	3	21.8587	1076.49	1076.49	Lac-AEJV-Lac-AEJA |2	503538
6582	22.8138	22.8511	6582	0.943326	3	2	3	22.838	1076.49	1076.49	Lac-AEJV-Lac-AEJA |2	162364
6657	23.3365	23.3786	6657	0.905418	3	2	3	23.3558	1076.49	1076.49	Lac-AEJV-Lac-AEJA |2	91576
6164	20.8801	21.06	6164	0.996389	36	1;2	3	20.973	1076.49	1076.49	Lac-AEJV-Lac-AEJA |2	3677401
5467	18.1846	18.2631	5467	0.992202	5	1	2	18.2241	625.261	625.261	Lac-AEJY |1	845070
6325	21.5413	21.5852	6325	0.99023	3	1	2	21.5658	625.266	625.261	Lac-AEJY |1	81737
4505	15.3098	15.7269	4505	0.998917	66	1;2	2	15.4579	625.26	625.261	Lac-AEJY |1	154811488
4832	16.2962	16.4282	4832	0.999055	13	1	2	16.3626	625.26	625.261	Lac-AEJY |1	1186741
6572	22.7698	22.8687	6572	0.994959	9	1;2	3	22.8285	1069.45	1069.45	Lac-AEJY-Lac-AEJ |2	220611
4716	15.8591	15.9397	4716	0.865373	4	2	3	15.9035	1069.46	1069.45	Lac-AEJY-Lac-AEJ |2	215950
6112	20.7394	20.9618	6112	0.997606	43	1;2	3	20.8031	1069.45	1069.45	Lac-AEJY-Lac-AEJ |2	5879063
6009	20.2138	20.6196	6009	0.997645	73	2;1	3	20.3371	1069.45	1069.45	Lac-AEJY-Lac-AEJ |2	40052584
6956	24.9564	25.189	6956	0.955601	18	2;1	3	25.0901	1069.45	1069.45	Lac-AEJY-Lac-AEJ |2	80896
6223	21.1122	21.1562	6223	0.990545	5	2;1	3	21.1427	1069.45	1069.45	Lac-AEJY-Lac-AEJ |2	257935
6303	21.4524	21.6866	6303	0.994978	34	1;2	3	21.5642	1140.48	1140.48	Lac-AEJY-Lac-AEJA |2	575730
6412	21.9915	22.0744	6412	0.952007	8	2	3	22.0354	1140.48	1140.48	Lac-AEJY-Lac-AEJA |2	124814
6361	21.7474	21.9364	6361	0.986287	20	2;1	3	21.8276	1140.48	1140.48	Lac-AEJY-Lac-AEJA |2	852090
6169	20.9065	21.3343	6169	0.997674	82	2;1	3	21.1806	1140.48	1140.48	Lac-AEJY-Lac-AEJA |2	7600962
754	4.0524	4.81425	754	0.999183	73	1;2	2	4.25052	590.255	590.255	Lac-AEJ[AG]|1	2208959
1701	7.45764	8.2169	1701	0.998795	91	1;2	2	7.87552	590.257	590.255	Lac-AEJ[AG]|1	1147964
1273	5.76584	5.84377	1273	0.99554	7	1;2	2	5.78813	590.256	590.255	Lac-AEJ[AG]|1	608574
2144	8.69969	8.94316	2144	0.99965	32	1;2	2	8.81925	590.255	590.255	Lac-AEJ[AG]|1	7531566
4431	15.0574	15.091	4431	0.998561	5	1	2	15.0792	632.302	632.306	Lac-AEJ[AV]|1	867359
2518	9.77512	9.89076	2518	0.996755	8	1	2	9.8282	632.303	632.306	Lac-AEJ[AV]|1	134061
4506	15.2922	15.4046	4506	0.99796	12	1	2	15.3515	632.303	632.306	Lac-AEJ[AV]|1	562527
3373	12.2124	12.3708	3373	0.997353	17	2;1	3	12.295	1020.43	1020.42	Lac-AEJ[GG]-Lac-AEJ |2	1002179
3209	11.7567	12.0358	3209	0.99967	61	2;1	3	11.8573	1020.43	1020.42	Lac-AEJ[GG]-Lac-AEJ |2	10255843
3604	12.7847	12.9364	3604	0.989551	26	1;2	3	12.8545	1091.46	1091.46	Lac-AEJ[GG]-Lac-AEJA |2	2488889
546	3.15021	3.40062	546	0.999999	45	1;2	2	3.25862	576.239	576.239	Lac-AEJ[GG]|1	6784522
6090	20.5589	20.6196	6090	0.99984	7	1	2	20.5941	575.28	575.285	Lac-AEJ[L/I] |1	1160209
5378	17.8174	18.3787	5378	0.99999	110	2;1	2	18.1444	575.281	575.285	Lac-AEJ[L/I] |1	207349216
6859	24.4006	25.0633	6859	0.998898	118	2;1	3	24.651	1019.47	1019.47	Lac-AEJ[L/I]-Lac-AEJ |2	3937991
6723	23.6297	24.3491	6723	0.998743	134	1;2	3	23.789	1019.47	1019.47	Lac-AEJ[L/I]-Lac-AEJ |2	84037656
6847	24.3046	24.4006	6847	0.997602	19	2;1	3	24.3478	1090.5	1090.51	Lac-AEJ[L/I]-Lac-AEJA |2	245095
7206	26.54	26.6496	7206	0.998993	16	2	3	26.5911	1090.5	1090.51	Lac-AEJ[L/I]-Lac-AEJA |2	107317
7067	25.6573	26.1442	7067	0.991994	75	2;1	3	25.9319	1090.5	1090.51	Lac-AEJ[L/I]-Lac-AEJA |2	437165
6994	25.1978	25.3507	6994	0.999411	27	2;1	3	25.2738	1090.5	1090.51	Lac-AEJ[L/I]-Lac-AEJA |2	244357
6902	24.6516	25.0633	6902	0.997512	84	2;1	3	24.8159	1090.5	1090.51	Lac-AEJ[L/I]-Lac-AEJA |2	12488818
6652	23.246	23.3473	6652	0.995371	16	1;2	3	23.301	1090.5	1090.51	Lac-AEJ[L/I]-Lac-AEJA |2	222483
838	4.28897	4.30625	838	0.998806	3	1	2	4.30036	462.197	462.196	Lac-AEJ|1	991935
1153	5.44739	5.47327	1153	0.996005	3	1	2	5.45639	462.197	462.196	Lac-AEJ|1	243296
563	3.24569	3.88016	563	0.999701	72	1	2	3.40967	462.196	462.196	Lac-AEJ|1	157401488
966	4.61467	4.84867	966	0.999162	12	1	2	4.72398	462.197	462.196	Lac-AEJ|1	328059

## Sheet: M7404.3
ID	xicStart	xicEnd	feature	corrMax	ionCount	chargeOrder	maxIsotopeCount	rt	mwMonoisotopic	theo_mwMonoisotopic	inferredStructure	maxIntensity		Structure	Intensity	RT	Abundance	Oligomerisation state
6229	22.1859	22.2654	6229	0.835121	3	2	3	22.2195	1421.61	1421.6	(Lac-AEJ)2-Lac-AEJA |3	51055		Lac-AEJA |1	2085244813	6.52373	0.311495	1
6670	24.454	24.5604	6670	0.811659	5	2	3	24.5104	1421.61	1421.6	(Lac-AEJ)2-Lac-AEJA |3	32886		Lac-AEJF |1	303120594	20.7072	0.0452803	1
6143	21.9062	22.1164	6143	0.991693	22	2	3	22.003	1421.61	1421.6	(Lac-AEJ)2-Lac-AEJA |3	76355		Lac-AEJG |1	132113295	4.04695	0.0197352	1
5998	21.2528	21.7298	5998	0.95732	37	2	3	21.4842	1421.61	1421.6	(Lac-AEJ)2-Lac-AEJA |3	98616		Lac-AEJ[L/I] |1	102004315	18.1386	0.0152375	1
6261	22.3716	22.5352	6261	0.957109	13	2	3	22.4737	1421.6	1421.6	(Lac-AEJ)2-Lac-AEJA |3	103518		Lac-AEJY |1	85383125	15.4587	0.0127546	1
6537	23.9116	24.0736	6537	0.978475	10	2	3	23.9985	1421.61	1421.6	(Lac-AEJ)2-Lac-AEJA |3	46904		Lac-AEJV |1	73393786	13.5447	0.0109636	1
5876	20.8072	21.1032	5876	0.962551	24	2	3	20.934	1421.61	1421.6	(Lac-AEJ)2-Lac-AEJA |3	145197		Lac-AEJ|1	42974715	3.40666	0.00641959	1
5779	20.3836	20.4818	5779	0.995697	5	2	3	20.4334	1421.6	1421.6	(Lac-AEJ)2-Lac-AEJA |3	124755		Lac-AEJR |1	14745299	3.98708	0.00220266	1
6811	25.2887	25.4038	6811	0.987231	7	2	3	25.3326	1421.61	1421.6	(Lac-AEJ)2-Lac-AEJA |3	36157		Lac-AEJAA|1	9010469	9.23606	0.00134599	1
5693	20.0786	20.1502	5693	0.964818	5	2	3	20.1145	1421.61	1421.6	(Lac-AEJ)2-Lac-AEJA |3	125081		Lac-AEJH |1	5017690	3.58495	0.000749545	1
6905	25.7818	25.8214	6905	0.854317	5	2	4	25.799	1421.6	1421.6	(Lac-AEJ)2-Lac-AEJA |3	21001		Lac-AEJS |1	4505603	3.49388	0.00067305	1
120	1.29044	1.38832	120	0.988007	9	2	3	1.33337	1421.6	1421.6	(Lac-AEJ)2-Lac-AEJA |3	22005		Lac-AEJ[AG]|1	3492857	8.72808	0.000521765	1
139	1.45132	1.50863	139	0.981158	6	2	3	1.47088	1421.6	1421.6	(Lac-AEJ)2-Lac-AEJA |3	21868		Lac-AEJK |1	3246464	2.99422	0.000484959	1
104	1.10329	1.24922	104	0.967027	14	2	3	1.16673	1421.61	1421.6	(Lac-AEJ)2-Lac-AEJA |3	23551		Lac-AEJ[GG]|1	2088989	3.2524	0.000312054	1
5478	19.2773	19.8422	5478	0.947155	56	2	3	19.5143	1421.61	1421.6	(Lac-AEJ)2-Lac-AEJA |3	786595		Lac-AEJ[AV]|1	292550	15.3507	4.37013e-05	1
6412	23.2258	23.2526	6412	0.955443	3	2	3	23.2406	1421.61	1421.6	(Lac-AEJ)2-Lac-AEJA |3	35635		Lac-AEJ-Lac-AEJA |2	1587877928	14.3811	0.237198	2
7053	26.6322	26.6852	7053	0.992975	4	2	3	26.6531	1421.61	1421.6	(Lac-AEJ)2-Lac-AEJA |3	24854		Lac-AEJA-Lac-AEJA |2	622429775	15.5143	0.0929789	2
5207	18.2762	19.2085	5207	0.998065	135	2;1	3	18.5039	1421.61	1421.6	(Lac-AEJ)2-Lac-AEJA |3	347323584		Lac-AEJG-Lac-AEJ |2	289800246	12.6673	0.0432905	2
7148	27.2005	27.2203	7148	0.877689	3	2	3	27.2108	1421.61	1421.6	(Lac-AEJ)2-Lac-AEJA |3	25665		Lac-AEJF-Lac-AEJ |2	115640035	25.6433	0.0172744	2
6398	23.0483	23.1478	6398	0.955893	7	2	3	23.1077	1421.61	1421.6	(Lac-AEJ)2-Lac-AEJA |3	67067		Lac-AEJ-JEA|2	103970182	14.3816	0.0155311	2
32	0.553113	1.05804	32	0.995087	64	2	3	0.668803	1421.61	1421.6	(Lac-AEJ)2-Lac-AEJA |3	739646		Lac-AEJ-Lac-AEJ |2	73277327	12.9581	0.0109462	2
5128	17.8697	18.0805	5128	0.999389	20	2	3	17.9357	1421.61	1421.6	(Lac-AEJ)2-Lac-AEJA |3	6071385		Lac-AEJG-Lac-AEJA |2	51113942	13.7899	0.00763543	2
6333	22.7417	22.886	6333	0.914497	9	2	3	22.7887	1421.6	1421.6	(Lac-AEJ)2-Lac-AEJA |3	80305		Lac-AEJ[L/I]-Lac-AEJ |2	51032180	23.7937	0.00762322	2
6594	24.135	24.2048	6594	0.997653	4	2	3	24.168	1421.61	1421.6	(Lac-AEJ)2-Lac-AEJA |3	33738		Lac-AEJY-Lac-AEJ |2	28377851	20.3466	0.0042391	2
6113	21.7385	21.883	6113	0.969118	14	2	3	21.7917	1407.58	1407.59	(Lac-AEJ)2-Lac-AEJG |3	532500		Lac-AEJF-Lac-AEJA |2	24860428	26.4462	0.00371366	2
6156	21.9416	22.0891	6156	0.990227	20	2	3	22.0109	1407.58	1407.59	(Lac-AEJ)2-Lac-AEJG |3	192854		Lac-AEJV-Lac-AEJ |2	19128172	19.911	0.00285738	2
6499	23.647	23.7202	6499	0.985028	6	2	3	23.6882	1407.58	1407.59	(Lac-AEJ)2-Lac-AEJG |3	155784		Lac-AEJK-Lac-AEJ |2	17807773	11.3193	0.00266014	2
6447	23.3885	23.5421	6447	0.952256	11	2	3	23.462	1407.58	1407.59	(Lac-AEJ)2-Lac-AEJG |3	116948		Lac-AEJR-Lac-AEJ |2	17631092	12.2801	0.00263374	2
6252	22.3629	22.5352	6252	0.999305	21	2	3	22.4455	1407.58	1407.59	(Lac-AEJ)2-Lac-AEJG |3	317452		Lac-AEJS-Lac-AEJ |2	10974591	12.2354	0.00163939	2
6621	24.2893	24.4212	6621	0.969902	16	2	3	24.3552	1407.58	1407.59	(Lac-AEJ)2-Lac-AEJG |3	89884		Lac-AEJH-Lac-AEJ |2	8720683	11.6485	0.0013027	2
4705	16.6773	17.4926	4705	0.998875	103	2;1	3	16.8429	1407.59	1407.59	(Lac-AEJ)2-Lac-AEJG |3	60135824		Lac-AEJ[L/I]-Lac-AEJA |2	7930765	24.8237	0.0011847	2
43	0.553113	0.570665	43	0.942822	3	2	3	0.560354	1407.59	1407.59	(Lac-AEJ)2-Lac-AEJG |3	98292		Lac-AEJ[GG]-Lac-AEJ |2	6298551	11.814	0.000940881	2
4976	17.3935	17.6903	4976	0.996524	29	2	3	17.596	1350.57	1350.57	(Lac-AEJ)3 |3	897107		Lac-AEJK-Lac-AEJA |2	6163975	12.3588	0.000920778	2
4844	17.0262	17.3026	4844	0.995038	44	1;2	3	17.1431	1350.57	1350.57	(Lac-AEJ)3 |3	14750584		Lac-AEJY-Lac-AEJA |2	5557120	21.2004	0.000830126	2
6561	24.0183	24.0407	6561	0.960482	4	2	4	24.0305	1851.77	1851.77	(Lac-AEJ)3-Lac-AEJG |4	41704		Lac-AEJR-Lac-AEJA |2	4053308	13.2567	0.000605485	2
6783	25.1807	25.2887	6783	0.976645	15	2	3	25.2382	1851.77	1851.77	(Lac-AEJ)3-Lac-AEJG |4	46719		Lac-AEJV-Lac-AEJA |2	2604370	20.9888	0.000389042	2
6919	25.8531	26.0362	6919	0.982158	27	2	4	25.9532	1851.77	1851.77	(Lac-AEJ)3-Lac-AEJG |4	49168		Lac-AEJS-Lac-AEJA |2	2370322	13.3444	0.00035408	2
7027	26.4952	26.6322	7027	0.949564	12	2	3	26.5483	1851.77	1851.77	(Lac-AEJ)3-Lac-AEJG |4	73157		Lac-AEJH-Lac-AEJA |2	2259529	12.6274	0.00033753	2
5566	19.5589	19.8947	5566	0.986445	60	3;2	3	19.7411	1851.78	1851.77	(Lac-AEJ)3-Lac-AEJG |4	2681172		Lac-AEJAA-Lac-AEJA |2	1609859	16.3448	0.000240482	2
5663	19.9902	20.0439	5663	0.88768	6	2	3	20.0178	1851.78	1851.77	(Lac-AEJ)3-Lac-AEJG |4	210349		Lac-AEJ[GG]-Lac-AEJA |2	1179272	12.8229	0.00017616	2
6611	24.2584	24.4703	6611	0.974993	30	2;3	3	24.3672	1851.77	1851.77	(Lac-AEJ)3-Lac-AEJG |4	266592		Lac-AEJM-Lac-AEJA |2	162554	23.4667	2.42824e-05	2
5656	19.9374	20.1325	5656	0.964315	23	2	3	20.0304	1794.76	1794.75	(Lac-AEJ)4 |4	1049825		(Lac-AEJ)2-Lac-AEJA |3	356117423	18.5039	0.053197	3
6065	21.5727	22.5262	6065	0.996977	218	2;3	3	21.8562	1936.83	1936.83	(Lac-AEJA)2-(Lac-AEJ)2 |4	14996465		(Lac-AEJA)2-LacAEJ |3	220447082	19.3655	0.0329305	3
5988	21.2722	21.3343	5988	0.978043	10	2;3	3	21.3002	1936.84	1936.83	(Lac-AEJA)2-(Lac-AEJ)2 |4	235641		(Lac-AEJ)2-Lac-AEJG |3	61639538	16.8429	0.00920775	3
27	0.553113	0.570665	27	0.966064	4	2;3	3	0.559604	1936.83	1936.83	(Lac-AEJA)2-(Lac-AEJ)2 |4	47840		(Lac-AEJA)3 |3	32345615	20.1465	0.00483181	3
6459	23.4368	24.099	6459	0.994608	135	3;2	5	23.7125	2381.01	2381.01	(Lac-AEJA)2-(Lac-AEJ)3 |5	1350455		Lac-AEJA-LacAEJG-LacAEJ |3	20418493	17.7128	0.00305013	3
6568	24.0647	24.126	6568	0.948682	10	3;2	3	24.0989	2050.86	2050.87	(Lac-AEJA)2-(Lac-AEJG)2 |4	41302		(Lac-AEJ)3 |3	15647691	17.1431	0.00233746	3
5990	21.2528	21.441	5990	0.853915	36	3;2	3	21.3254	1993.85	1993.85	(Lac-AEJA)2-Lac-AEJ-Lac-AEJG |4	172594		(Lac-AEJA)2-LacAEJG |3	4742214	18.4374	0.000708395	3
5897	20.8966	21.1292	5897	0.995408	52	3;2	3	21.0162	1993.85	1993.85	(Lac-AEJA)2-Lac-AEJ-Lac-AEJG |4	468020		(Lac-AEJG)2-LacAEJ |3	961742	16.0515	0.000143666	3
21	0.553113	0.647121	21	0.999984	9	2	3	0.568492	1492.65	1492.64	(Lac-AEJA)2-LacAEJ |3	298045		(Lac-AEJG)2-LacAEJA |3	598628	16.8249	8.94234e-05	3
6147	21.9062	22.0417	6147	0.95441	15	2	3	21.9822	1492.64	1492.64	(Lac-AEJA)2-LacAEJ |3	68332		(Lac-AEJG)3 |3	107860	19.4946	1.61122e-05	3
5294	18.6244	18.741	5294	0.983673	14	2	3	18.6928	1492.64	1492.64	(Lac-AEJA)2-LacAEJ |3	990680		Lac-AEJA-(Lac-AEJ)3 |4	17932536	21.1634	0.00267877	4
6102	21.6578	21.7123	6102	0.893024	3	2	3	21.683	1492.65	1492.64	(Lac-AEJA)2-LacAEJ |3	87377		(Lac-AEJA)2-(Lac-AEJ)2 |4	15279946	21.8562	0.00228253	4
60	0.677877	0.716616	60	0.977036	3	2	3	0.694924	1492.64	1492.64	(Lac-AEJA)2-LacAEJ |3	18856		(Lac-AEJA)3-Lac-AEJ |4	4564041	22.4968	0.000681779	4
5417	19.0188	20.6168	5417	0.994662	206	2;1	3	19.3655	1492.64	1492.64	(Lac-AEJA)2-LacAEJ |3	218983792		(Lac-AEJ)3-Lac-AEJG |4	3368861	19.7411	0.000503242	4
5239	18.3481	18.5118	5239	0.993398	19	2	3	18.4374	1549.66	1549.66	(Lac-AEJA)2-LacAEJG |3	3584820		Lac-AEJA-(Lac-AEJ)2-Lac-AEJG |4	2689035	20.3832	0.00040169	4
5322	18.688	18.8309	5322	0.984044	17	2	3	18.7632	1549.67	1549.66	(Lac-AEJA)2-LacAEJG |3	826648		(Lac-AEJA)4 |4	1762129	22.9325	0.000263228	4
5378	18.9111	19.0366	5378	0.997754	11	2	3	18.9616	1549.66	1549.66	(Lac-AEJA)2-LacAEJG |3	330746		(Lac-AEJ)4 |4	1049825	20.0304	0.000156823	4
5636	19.8246	20.5897	5636	0.997307	95	2;3;1	3	20.1465	1563.68	1563.68	(Lac-AEJA)3 |3	30840250		(Lac-AEJA)2-Lac-AEJ-Lac-AEJG |4	640614	21.0162	9.56953e-05	4
41	0.553113	0.570665	41	0.90405	3	2	3	0.559946	1563.68	1563.68	(Lac-AEJA)3 |3	67705		(Lac-AEJA)3-Lac-AEJG |4	167783	21.6252	2.50635e-05	4
5848	20.7726	20.9695	5848	0.994634	23	2	3	20.8527	1563.68	1563.68	(Lac-AEJA)3 |3	1437660		(Lac-AEJA)2-(Lac-AEJG)2 |4	41302	24.0989	6.16972e-06	4
6551	23.9792	24.6809	6551	0.964569	149	3;2	5	24.2625	2452.05	2452.05	(Lac-AEJA)3-(Lac-AEJ)2 |5	959164		(Lac-AEJA)2-(Lac-AEJ)3 |5	1350455	23.7125	0.000201732	5
6224	22.2214	23.1389	6224	0.98918	196	3;2	4	22.4968	2007.87	2007.86	(Lac-AEJA)3-Lac-AEJ |4	4564041		Lac-AEJA-(Lac-AEJ)4 |5	1094267	23.1015	0.000163462	5
6880	25.6879	25.7818	6880	0.923816	13	3;2	4	25.721	2064.87	2064.89	(Lac-AEJA)3-Lac-AEJG |4	46860		(Lac-AEJA)3-(Lac-AEJ)2 |5	959164	24.2625	0.00014328	5
6072	21.5727	21.6665	6072	0.960128	19	2;3	4	21.6252	2064.89	2064.89	(Lac-AEJA)3-Lac-AEJG |4	120923		(Lac-AEJA)4-Lac-AEJ |5	693903	24.6384	0.000103656	5
6349	22.8325	23.0483	6349	0.991915	54	3;2	4	22.9325	2078.91	2078.9	(Lac-AEJA)4 |4	1117046		(Lac-AEJA)5 |5	224866	25.0828	3.35906e-05	5
6471	23.5334	23.647	6471	0.941886	24	2;3	4	23.5903	2078.91	2078.9	(Lac-AEJA)4 |4	113950
6405	23.1746	23.3975	6405	0.996432	57	3;2	4	23.2691	2078.91	2078.9	(Lac-AEJA)4 |4	531133		Sum intensity	6694311407
6778	25.1296	25.2285	6778	0.838757	13	3	4	25.1783	2523.09	2523.09	(Lac-AEJA)4-Lac-AEJ |5	54229
6679	24.5337	24.7424	6679	0.995905	44	3;2	5	24.6384	2523.09	2523.09	(Lac-AEJA)4-Lac-AEJ |5	391579
6726	24.8229	25.0336	6726	0.994867	40	3;2	5	24.9143	2523.09	2523.09	(Lac-AEJA)4-Lac-AEJ |5	248095
6796	25.2652	25.4097	6796	0.905849	19	3	4	25.3248	2594.13	2594.12	(Lac-AEJA)5 |5	87698
6755	25.0051	25.1638	6755	0.939197	30	3;2	5	25.0828	2594.13	2594.12	(Lac-AEJA)5 |5	137168
4470	15.9579	16.1548	4470	0.97011	23	2	3	16.0515	1464.61	1464.61	(Lac-AEJG)2-LacAEJ |3	961742
4742	16.7671	16.9072	4742	0.994722	16	2	3	16.8249	1535.65	1535.65	(Lac-AEJG)2-LacAEJA |3	598628
5534	19.4693	19.5063	5534	0.942647	3	2	3	19.4946	1521.64	1521.63	(Lac-AEJG)3 |3	107860
3932	14.2743	14.7402	3932	0.998086	71	2;1	3	14.3816	834.36	834.36	Lac-AEJ-JEA|2	45812448
4196	15.0597	15.3322	4196	0.998792	57	2;1	3	15.1729	834.36	834.36	Lac-AEJ-JEA|2	24691732
1792	7.97677	8.26548	1792	0.999892	50	1;2	3	8.11305	834.362	834.36	Lac-AEJ-JEA|2	3983865
3861	14.0019	14.0909	3861	0.985176	10	2	3	14.0512	834.361	834.36	Lac-AEJ-JEA|2	526909
2025	8.6371	8.69657	2025	0.994649	4	2	3	8.66403	834.362	834.36	Lac-AEJ-JEA|2	73504
2140	8.97336	9.1664	2140	0.997195	22	2	3	9.06699	834.362	834.36	Lac-AEJ-JEA|2	1406188
2216	9.24479	9.90578	2216	0.9994	105	2;1	3	9.44558	834.361	834.36	Lac-AEJ-JEA|2	16891492
2592	10.3622	10.6113	2592	0.99892	43	2;1	3	10.4836	834.361	834.36	Lac-AEJ-JEA|2	10416596
1481	6.85372	6.99192	1481	0.989503	14	2	2	6.92759	834.361	834.36	Lac-AEJ-JEA|2	167448
3442	12.848	13.17	3442	0.998817	57	1;2	3	12.9581	906.382	906.382	Lac-AEJ-Lac-AEJ |2	64283032
3645	13.4231	13.6301	3645	0.998015	45	2;1	3	13.5184	906.382	906.382	Lac-AEJ-Lac-AEJ |2	8994295
4521	16.1107	16.2265	4521	0.998441	27	2;1	3	16.1694	977.42	977.419	Lac-AEJ-Lac-AEJA |2	516132
4148	14.9184	15.466	4148	0.99813	123	2;1	3	15.1727	977.419	977.419	Lac-AEJ-Lac-AEJA |2	544258752
4802	16.9353	17.8697	4802	0.989361	91	2;1	2	17.3242	977.42	977.419	Lac-AEJ-Lac-AEJA |2	223430
5163	18.0371	18.1348	5163	0.980843	5	2	2	18.0729	977.419	977.419	Lac-AEJ-Lac-AEJA |2	186735
3843	14.0205	14.8579	3843	0.999354	177	1;2	2	14.3811	977.419	977.419	Lac-AEJ-Lac-AEJA |2	1039901696
4309	15.5415	16.0386	4309	0.964369	105	2;1	3	15.7523	977.419	977.419	Lac-AEJ-Lac-AEJA |2	1682753
20	0.543344	1.02254	20	0.996941	48	2;1	3	0.639996	977.424	977.419	Lac-AEJ-Lac-AEJA |2	659930
4567	16.3287	16.8812	4567	0.965914	85	2;1	3	16.5893	977.421	977.419	Lac-AEJ-Lac-AEJA |2	396296
7885	35.215	35.2242	7885	0.990164	3	2	2	35.2197	977.423	977.419	Lac-AEJ-Lac-AEJA |2	25593
106	1.09723	1.14731	106	0.992648	4	2	2	1.12322	977.42	977.419	Lac-AEJ-Lac-AEJA |2	26611
2691	10.6026	10.6548	2691	0.999293	5	1	2	10.6311	533.234	533.233	Lac-AEJA |1	236586
2481	10.1289	10.3875	2481	0.99895	31	1	2	10.2544	533.234	533.233	Lac-AEJA |1	249158
2261	9.37454	9.98647	2261	0.999607	65	1	2	9.65915	533.234	533.233	Lac-AEJA |1	299733
2718	10.7173	11.0778	2718	0.999269	32	1	2	10.8871	533.234	533.233	Lac-AEJA |1	688476
5650	19.9035	19.9202	5650	0.994938	3	1	2	19.9123	533.233	533.233	Lac-AEJA |1	306568
2921	11.3896	11.424	2921	0.999797	4	1	2	11.4031	533.234	533.233	Lac-AEJA |1	188536
3413	12.7607	12.8834	3413	0.99996	7	1	2	12.83	533.234	533.233	Lac-AEJA |1	129217
5454	19.1625	19.182	5454	0.998857	3	1	2	19.1727	533.234	533.233	Lac-AEJA |1	163635
3059	11.7309	12.0058	3059	0.998741	21	1	2	11.8909	533.234	533.233	Lac-AEJA |1	127937
1030	4.77562	4.89111	1030	0.992341	9	1	2	4.83611	533.234	533.233	Lac-AEJA |1	127975
45	0.543344	0.553113	45	0.999324	3	1	2	0.551806	533.236	533.233	Lac-AEJA |1	165273
4305	15.466	15.5415	4305	0.94972	3	1	2	15.5064	533.234	533.233	Lac-AEJA |1	1568493
3188	12.1393	12.1657	3188	0.999998	4	1	2	12.1537	533.233	533.233	Lac-AEJA |1	107082
1336	6.07111	9.297	1336	0.999767	431	2;1	2	6.52373	533.233	533.233	Lac-AEJA |1	2080886144
6734	24.8865	24.9304	6734	0.81966	5	2	3	24.9061	1922.81	1922.81	Lac-AEJA-(Lac-AEJ)2-Lac-AEJG |4	67256
5724	20.2091	20.5631	5724	0.981345	78	2;3	3	20.3832	1922.81	1922.81	Lac-AEJA-(Lac-AEJ)2-Lac-AEJG |4	2057202
5844	20.7208	20.8423	5844	0.86562	15	2;3	3	20.7611	1922.81	1922.81	Lac-AEJA-(Lac-AEJ)2-Lac-AEJG |4	564577
5822	20.5631	20.7035	5822	0.953356	14	2	3	20.645	1865.8	1865.79	Lac-AEJA-(Lac-AEJ)3 |4	696199
5923	20.9784	21.5637	5923	0.990413	127	2;3	3	21.1634	1865.79	1865.79	Lac-AEJA-(Lac-AEJ)3 |4	17021404
6135	21.8107	21.949	6135	0.761273	6	2	4	21.865	1865.79	1865.79	Lac-AEJA-(Lac-AEJ)3 |4	105375
6179	21.9961	22.0417	6179	0.772881	4	2	3	22.0178	1865.79	1865.79	Lac-AEJA-(Lac-AEJ)3 |4	42107
42	0.553113	0.570665	42	0.963772	4	3;2	3	0.559894	1865.8	1865.79	Lac-AEJA-(Lac-AEJ)3 |4	67451
6380	22.9515	23.3101	6380	0.99219	74	3;2	5	23.1015	2309.98	2309.98	Lac-AEJA-(Lac-AEJ)4 |5	1094267
4770	16.8722	17.1419	4770	0.976114	24	2	3	16.9926	1048.46	1048.46	Lac-AEJA-Lac-AEJA |2	270315
4263	15.2795	15.8856	4263	0.999352	124	1;2	3	15.5143	1048.46	1048.46	Lac-AEJA-Lac-AEJA |2	372054016
44	0.553113	0.561984	44	0.99022	3	2;1	3	0.555273	1048.46	1048.46	Lac-AEJA-Lac-AEJA |2	206356
4894	17.2227	17.5742	4894	0.976869	23	2;1	3	17.4015	1048.46	1048.46	Lac-AEJA-Lac-AEJA |2	121824
4481	16.0212	16.8196	4481	0.998058	137	1;2	3	16.2675	1048.46	1048.46	Lac-AEJA-Lac-AEJA |2	249777264
5301	18.6334	18.6685	5301	0.978723	3	2	3	18.6524	1478.63	1478.63	Lac-AEJA-LacAEJG-LacAEJ |3	89787
5414	19.0366	19.0898	5414	0.969207	5	2	3	19.0678	1478.63	1478.63	Lac-AEJA-LacAEJG-LacAEJ |3	84422
4674	16.5788	16.6072	4674	0.899819	3	2	3	16.5959	1478.63	1478.63	Lac-AEJA-LacAEJG-LacAEJ |3	164934
5007	17.5012	18.4183	5007	0.998467	110	2;1	3	17.7128	1478.63	1478.63	Lac-AEJA-LacAEJG-LacAEJ |3	20079350
4561	16.3113	16.3994	4561	0.999487	11	2	3	16.3448	1119.49	1119.49	Lac-AEJAA-Lac-AEJA |2	1052627
4664	16.5172	16.5875	4664	0.982214	9	2	3	16.5501	1119.49	1119.49	Lac-AEJAA-Lac-AEJA |2	235745
4819	16.9797	17.0703	4819	0.970522	10	2	3	17.0318	1119.5	1119.49	Lac-AEJAA-Lac-AEJA |2	321487
2072	8.82056	9.04331	2072	0.998816	39	1;2	2	8.92391	604.271	604.27	Lac-AEJAA|1	1309309
2189	9.12284	9.37454	2189	0.999728	30	1	2	9.23606	604.271	604.27	Lac-AEJAA|1	4596287
2671	10.5411	10.7708	2671	0.999996	27	1	2	10.684	604.271	604.27	Lac-AEJAA|1	2857179
2571	10.2863	10.3801	2571	0.999368	13	1	2	10.3302	604.272	604.27	Lac-AEJAA|1	247694
5993	21.2355	21.4499	5993	0.999136	21	1	2	21.3364	609.265	609.269	Lac-AEJF |1	232257
6060	21.5145	21.6506	6060	0.996392	13	1	2	21.5841	609.265	609.269	Lac-AEJF |1	120071
5785	20.4467	21.1834	5785	0.999426	116	2;1	2	20.7072	609.265	609.269	Lac-AEJF |1	300283872
6210	22.1327	22.3802	6210	0.999246	37	1;2	2	22.2486	609.265	609.269	Lac-AEJF |1	2484394
6833	25.3931	26.7961	6833	0.99914	352	1;2	3	25.6433	1053.45	1053.45	Lac-AEJF-Lac-AEJ |2	115534256
7095	26.8735	27.3283	7095	0.999708	58	2;1	3	27.0427	1053.45	1053.45	Lac-AEJF-Lac-AEJ |2	105779
6839	25.4477	25.6683	6839	0.997546	35	2;1	3	25.5525	1124.49	1124.49	Lac-AEJF-Lac-AEJA |2	2384023
6943	26.0032	26.1647	6943	0.999462	36	1;2	3	26.0898	1124.49	1124.49	Lac-AEJF-Lac-AEJA |2	328553
6987	26.2943	26.7229	6987	0.999043	96	2;1	3	26.4462	1124.49	1124.49	Lac-AEJF-Lac-AEJA |2	18949232
7379	28.7769	28.9126	7379	0.998273	33	2;1	3	28.8422	1124.49	1124.49	Lac-AEJF-Lac-AEJA |2	236593
7126	27.0413	27.08	7126	0.840628	3	2	3	27.0567	1124.49	1124.49	Lac-AEJF-Lac-AEJA |2	28792
7235	27.7804	27.8654	7235	0.996666	7	2	3	27.8218	1124.49	1124.49	Lac-AEJF-Lac-AEJA |2	55870
7155	27.2395	27.6182	7155	0.998975	85	1;2	3	27.3941	1124.49	1124.49	Lac-AEJF-Lac-AEJA |2	1839272
7313	28.2485	28.4908	7313	0.991302	51	1;2	3	28.3456	1124.49	1124.49	Lac-AEJF-Lac-AEJA |2	1038093
1319	6.00209	6.13734	1319	0.995691	16	1	2	6.07227	519.22	519.218	Lac-AEJG |1	106665
1360	6.19908	6.25833	1360	0.99849	5	1	2	6.22183	519.219	519.218	Lac-AEJG |1	42444
738	3.85779	4.74222	738	0.999829	128	1;2	2	4.04695	519.218	519.218	Lac-AEJG |1	131050712
3355	12.6416	12.6837	3355	0.99722	4	1	2	12.6676	519.219	519.218	Lac-AEJG |1	788569
2089	8.83813	8.97336	2089	0.99317	11	1	2	8.93109	519.218	519.218	Lac-AEJG |1	80515
2042	8.67696	8.72296	2042	0.858178	3	1	2	8.69866	519.219	519.218	Lac-AEJG |1	44390
3329	12.5355	13.0497	3329	0.997404	96	2;1	3	12.6673	963.403	963.403	Lac-AEJG-Lac-AEJ |2	219067456
3723	13.656	13.7276	3723	0.992798	3	2	3	13.6853	963.404	963.403	Lac-AEJG-Lac-AEJ |2	156305
3513	13.1351	13.496	3513	0.997485	76	2;1	3	13.2407	963.404	963.403	Lac-AEJG-Lac-AEJ |2	70405896
3792	13.8249	14.0103	3792	0.998555	12	2	3	13.9081	963.403	963.403	Lac-AEJG-Lac-AEJ |2	170589
3998	14.5096	14.8295	3998	0.999952	37	1;2	3	14.6516	1034.44	1034.44	Lac-AEJG-Lac-AEJA |2	742075
4265	15.297	15.404	4265	0.969321	8	2	3	15.3666	1034.44	1034.44	Lac-AEJG-Lac-AEJA |2	292821
3928	14.2658	14.3584	3928	0.980248	21	1;2	3	14.3299	1034.44	1034.44	Lac-AEJG-Lac-AEJA |2	9661550
3721	13.656	14.0103	3721	0.998896	66	1;2	3	13.7899	1034.44	1034.44	Lac-AEJG-Lac-AEJA |2	39772044
3259	12.4303	12.5794	3259	0.999242	16	2	3	12.4839	1034.44	1034.44	Lac-AEJG-Lac-AEJA |2	645452
634	3.4694	3.80378	634	0.999361	56	1;2	3	3.58495	599.255	599.26	Lac-AEJH |1	3756723
561	3.15998	3.3189	561	0.987695	21	2;1	2	3.22522	599.255	599.26	Lac-AEJH |1	1260967
2979	11.5516	11.7485	2979	0.999553	20	2	3	11.6485	1043.44	1043.45	Lac-AEJH-Lac-AEJ |2	5079002
2882	11.274	11.4436	2882	0.997499	20	2	3	11.3433	1043.44	1043.45	Lac-AEJH-Lac-AEJ |2	3158830
3122	11.9621	12.0865	3122	0.994029	14	2	3	12.0064	1043.44	1043.45	Lac-AEJH-Lac-AEJ |2	482851
3240	12.2808	12.5091	3240	0.997788	24	2	3	12.3719	1114.48	1114.48	Lac-AEJH-Lac-AEJA |2	769292
3347	12.5794	12.6501	3347	0.996687	8	2	3	12.6274	1114.48	1114.48	Lac-AEJH-Lac-AEJA |2	1490237
459	2.86915	3.20537	459	0.999783	72	2;1	3	2.99422	590.291	590.296	Lac-AEJK |1	3246464
2872	11.2133	11.4791	2872	0.999594	39	2;1	3	11.3193	1034.48	1034.48	Lac-AEJK-Lac-AEJ |2	15042214
3069	11.7943	11.9972	3069	0.995754	23	2	3	11.885	1034.48	1034.48	Lac-AEJK-Lac-AEJ |2	2765559
3215	12.2636	12.5003	3215	0.995457	28	2	3	12.3588	1105.51	1105.52	Lac-AEJK-Lac-AEJA |2	3547736
3489	12.9792	13.0839	3489	0.996855	11	2	3	13.0463	1105.51	1105.52	Lac-AEJK-Lac-AEJA |2	740143
3596	13.3354	13.4605	3596	0.998923	15	2	3	13.3869	1105.51	1105.52	Lac-AEJK-Lac-AEJA |2	1309066
3772	13.8162	13.9316	3772	0.997923	14	2	3	13.8689	1105.52	1105.52	Lac-AEJK-Lac-AEJA |2	567030
6434	23.2967	23.6649	6434	0.969427	35	2	3	23.4667	1108.46	1108.46	Lac-AEJM-Lac-AEJA |2	162554
902	4.35209	4.82843	902	0.999447	90	2;1	3	4.53798	618.297	618.301	Lac-AEJR |1	4591466
725	3.83884	4.267	725	0.998795	80	2;1	3	3.98708	618.297	618.301	Lac-AEJR |1	10153833
3359	12.6837	12.9007	3359	0.991249	31	2;1	3	12.749	1062.48	1062.49	Lac-AEJR-Lac-AEJ |2	2968363
3184	12.1393	12.5003	3184	0.997684	43	2	3	12.2801	1062.48	1062.49	Lac-AEJR-Lac-AEJ |2	14662729
3762	13.8249	13.9226	3762	0.979983	12	2	3	13.8701	1133.52	1133.52	Lac-AEJR-Lac-AEJA |2	504268
3518	13.1266	13.5155	3518	0.998518	40	2	3	13.2567	1133.52	1133.52	Lac-AEJR-Lac-AEJA |2	3549040
1095	5.09137	5.20831	1095	0.996909	15	1;2	2	5.15527	549.229	549.233	Lac-AEJS |1	562753
1241	5.71457	6.1213	1241	0.995259	50	1	2	5.91945	549.229	549.233	Lac-AEJS |1	567076
1148	5.3503	5.56071	1148	0.996724	24	1	2	5.4384	549.229	549.233	Lac-AEJS |1	597764
997	4.6939	4.83706	997	0.997628	14	1	2	4.75745	549.229	549.233	Lac-AEJS |1	314820
2210	9.24479	9.3044	2210	0.962014	7	1	2	9.2733	549.229	549.233	Lac-AEJS |1	77097
760	3.92784	3.94536	760	0.99997	3	1	2	3.93903	549.229	549.233	Lac-AEJS |1	91344
953	4.57838	4.61504	953	0.999095	3	1	2	4.58914	549.23	549.233	Lac-AEJS |1	156224
477	2.9215	2.95835	477	0.875275	3	2	2	2.93852	549.236	549.233	Lac-AEJS |1	86706
611	3.41584	3.60946	611	0.998633	21	1;2	2	3.49388	549.229	549.233	Lac-AEJS |1	2051819
3381	12.7262	13.024	3381	0.999829	47	2;1	3	12.8207	993.415	993.419	Lac-AEJS-Lac-AEJ |2	1611248
3136	12.0429	12.4195	3136	0.996936	62	1;2	3	12.2354	993.415	993.419	Lac-AEJS-Lac-AEJ |2	6724236
4163	14.9793	15.0334	4163	0.987922	5	2;1	3	15.0058	993.416	993.419	Lac-AEJS-Lac-AEJ |2	166248
3578	13.2839	13.4872	3578	0.987353	21	2;1	3	13.3669	993.414	993.419	Lac-AEJS-Lac-AEJ |2	345990
3674	13.5586	14.2298	3674	0.99938	109	1;2	3	13.8503	993.415	993.419	Lac-AEJS-Lac-AEJ |2	934421
3990	14.5096	14.538	3990	0.985118	4	2	3	14.5234	993.414	993.419	Lac-AEJS-Lac-AEJ |2	179822
3306	12.4916	12.6161	3306	0.999223	24	2;1	3	12.5744	993.413	993.419	Lac-AEJS-Lac-AEJ |2	590233
4065	14.7228	14.9097	4065	0.999386	17	2;1	3	14.797	993.415	993.419	Lac-AEJS-Lac-AEJ |2	422393
3563	13.2754	13.4872	3563	0.985364	39	2;1	3	13.3444	1064.45	1064.46	Lac-AEJS-Lac-AEJA |2	1616819
4185	15.0053	15.094	4185	0.966925	7	2	3	15.0404	1064.45	1064.46	Lac-AEJS-Lac-AEJA |2	200077
3764	13.8425	14.0822	3764	0.99195	26	2;1	3	13.9566	1064.45	1064.46	Lac-AEJS-Lac-AEJA |2	553426
3124	11.9532	12.0951	3124	0.993145	25	1	2	12.0133	561.265	561.269	Lac-AEJV |1	296453
3784	13.8533	14.0822	3784	0.998971	24	1	2	14.0274	561.265	561.269	Lac-AEJV |1	1270744
3633	13.4058	13.7535	3633	0.999961	59	1;2	2	13.5447	561.265	561.269	Lac-AEJV |1	71729000
2446	9.9601	9.97782	2446	0.990691	3	1	2	9.96989	561.265	561.269	Lac-AEJV |1	97589
5630	19.7981	20.0613	5630	0.998209	55	2;1	3	19.911	1005.45	1005.45	Lac-AEJV-Lac-AEJ |2	16161786
5840	20.695	20.8788	5840	0.999569	37	2;1	3	20.7619	1005.45	1005.45	Lac-AEJV-Lac-AEJ |2	2711996
5721	20.1592	20.296	5721	0.998932	16	2;1	3	20.2437	1005.45	1005.45	Lac-AEJV-Lac-AEJ |2	254390
5895	20.8966	21.0681	5895	0.999033	35	2;1	3	20.9888	1076.49	1076.49	Lac-AEJV-Lac-AEJA |2	2280480
6126	21.8107	21.9358	6126	0.99447	16	2;1	3	21.8713	1076.49	1076.49	Lac-AEJV-Lac-AEJA |2	278715
6442	23.3487	23.3885	6442	0.990503	3	2	3	23.3621	1076.49	1076.49	Lac-AEJV-Lac-AEJA |2	45175
5192	18.187	18.2305	5192	0.995369	4	1	2	18.2057	625.259	625.261	Lac-AEJY |1	524752
4569	16.3373	16.4259	4569	0.997851	12	1;2	2	16.3792	625.26	625.261	Lac-AEJY |1	523189
4258	15.3144	15.7434	4258	0.999649	62	1;2	2	15.4587	625.259	625.261	Lac-AEJY |1	84335184
4457	15.9032	15.9579	4457	0.963786	5	2	3	15.9295	1069.46	1069.45	Lac-AEJY-Lac-AEJ |2	160051
5963	21.1468	21.1731	5963	0.993087	3	2	3	21.1595	1069.45	1069.45	Lac-AEJY-Lac-AEJ |2	150097
3940	14.2827	14.2997	3940	0.987278	3	2	3	14.2914	1069.45	1069.45	Lac-AEJY-Lac-AEJ |2	529403
5731	20.224	20.6168	5731	0.9987	62	2;1	3	20.3466	1069.45	1069.45	Lac-AEJY-Lac-AEJ |2	24095316
5849	20.7552	20.9519	5849	0.997281	40	2;1	3	20.818	1069.45	1069.45	Lac-AEJY-Lac-AEJ |2	3213812
6337	22.7591	22.8771	6337	0.992423	12	2;1	3	22.8096	1069.45	1069.45	Lac-AEJY-Lac-AEJ |2	155078
6750	24.9453	25.209	6750	0.969133	31	2;1	3	25.0724	1069.45	1069.45	Lac-AEJY-Lac-AEJ |2	74094
6116	21.7758	21.9151	6116	0.995739	19	2;1	3	21.8381	1140.48	1140.48	Lac-AEJY-Lac-AEJA |2	431439
5914	20.943	21.343	5914	0.993521	70	2;1	3	21.2004	1140.48	1140.48	Lac-AEJY-Lac-AEJA |2	4670132
6175	21.974	22.0535	6175	0.982491	13	2	3	22.0166	1140.48	1140.48	Lac-AEJY-Lac-AEJA |2	87119
6059	21.4978	21.6665	6059	0.981308	29	2;1	3	21.5733	1140.48	1140.48	Lac-AEJY-Lac-AEJA |2	368430
1709	7.70312	8.2313	1709	0.999913	46	1;2	2	7.8712	590.256	590.255	Lac-AEJ[AG]|1	495822
2011	8.60643	8.84882	2011	0.999958	30	2;1	2	8.72808	590.255	590.255	Lac-AEJ[AG]|1	2345359
776	4.05847	4.1458	776	0.998583	12	1;2	2	4.1013	590.256	590.255	Lac-AEJ[AG]|1	462736
1243	5.72034	6.01499	1243	0.997938	29	2;1	2	5.85642	590.256	590.255	Lac-AEJ[AG]|1	188940
2364	9.69974	9.80843	2364	0.997708	11	1	2	9.76096	632.303	632.306	Lac-AEJ[AV]|1	49368
4259	15.2884	15.3954	4259	0.998534	11	1	2	15.3507	632.303	632.306	Lac-AEJ[AV]|1	243182
4950	17.3293	17.3668	4950	0.989702	3	2	3	17.3491	1020.43	1020.42	Lac-AEJ[GG]-Lac-AEJ |2	129917
3037	11.7135	11.9885	3037	0.998898	54	2;1	3	11.814	1020.43	1020.42	Lac-AEJ[GG]-Lac-AEJ |2	5636823
3207	12.1943	12.3155	3207	0.980803	14	2	3	12.2631	1020.43	1020.42	Lac-AEJ[GG]-Lac-AEJ |2	531811
3395	12.7522	12.9007	3395	0.997897	22	2;1	3	12.8229	1091.46	1091.46	Lac-AEJ[GG]-Lac-AEJA |2	1179272
2983	11.5516	11.6155	2983	0.999871	8	1	2	11.5826	576.24	576.239	Lac-AEJ[GG]|1	201063
560	3.15998	3.36425	560	0.997944	36	1;2	2	3.2524	576.239	576.239	Lac-AEJ[GG]|1	1854310
1225	5.63689	5.66873	1225	0.870365	3	1	2	5.65649	576.242	576.239	Lac-AEJ[GG]|1	33616
5104	17.7979	18.3745	5104	0.999988	104	1;2	2	18.1386	575.281	575.285	Lac-AEJ[L/I] |1	101586488
5821	20.5897	20.6168	5821	0.996676	3	1	2	20.6066	575.28	575.285	Lac-AEJ[L/I] |1	417827
6659	24.454	25.0454	6659	0.999031	114	1;2	3	24.6573	1019.47	1019.47	Lac-AEJ[L/I]-Lac-AEJ |2	1900428
6495	23.6207	24.2584	6495	0.999412	115	1;2	3	23.7937	1019.47	1019.47	Lac-AEJ[L/I]-Lac-AEJ |2	49131752
6869	25.6248	26.1153	6869	0.895028	75	1;2	3	25.8901	1090.5	1090.51	Lac-AEJ[L/I]-Lac-AEJA |2	240278
6620	24.2965	24.4065	6620	0.995474	14	2;1	3	24.3498	1090.5	1090.51	Lac-AEJ[L/I]-Lac-AEJA |2	127151
6787	25.2212	25.3539	6787	0.998715	27	2;1	3	25.283	1090.5	1090.51	Lac-AEJ[L/I]-Lac-AEJA |2	130046
6419	23.2526	23.3616	6419	0.995844	22	2;1	3	23.3051	1090.5	1090.51	Lac-AEJ[L/I]-Lac-AEJA |2	123303
7036	26.5379	26.6066	7036	0.925515	9	2	3	26.5763	1090.5	1090.51	Lac-AEJ[L/I]-Lac-AEJA |2	39182
6706	24.6809	25.0507	6706	0.996689	84	1;2	3	24.8237	1090.5	1090.51	Lac-AEJ[L/I]-Lac-AEJA |2	7270805
1337	6.0637	6.13016	1337	0.994668	3	1	2	6.09131	462.198	462.196	Lac-AEJ|1	31651
581	3.22253	3.8664	581	0.999683	62	1	2	3.40666	462.196	462.196	Lac-AEJ|1	42943064

## Sheet: M7404 Av
Structure	Intensity		RT				Abundance				Oligomerisation	Intensity					Abundance
			Av		SD		Av		SD		state	M7404.1	M7404.3	M7404.2	SUM		M7404.1	M7404.3	M7404.2	Av
Lac-AEJA |1	3.34777e+09		6.51812	±	0.118867		0.323363	±	0.0074124		1	3939595259	4018483945	2085244813	10043324017		0.328887	0.324435	0.311495	0.323363
Lac-AEJF |1	5.08306e+08		20.6986	±	0.00641772		0.0490976	±	0.00297635		1	628567966	593230605	303120594	1524919165		0.0524744	0.0478949	0.0452803	0.0490976
Lac-AEJG |1	351829000		4.04618	±	0.00522496		0.0339833	±	0.00883331		1	419839611	503534094	132113295	1055487000		0.0350493	0.0406532	0.0197352	0.0339833
Lac-AEJ[L/I] |1	1.81521e+08		18.1447	±	0.00512334		0.0175332	±	0.00177562		1	234047909	208509425	102004315	544561649		0.0195389	0.0168342	0.0152375	0.0175332
Lac-AEJV |1	1.22221e+08		13.5649	±	0.0143289		0.0118053	±	0.000716126		1	151655027	141612745	73393786	366661558		0.0126605	0.0114332	0.0109636	0.0118053
Lac-AEJY |1	1.31098e+08		15.4552	±	0.00430458		0.0126628	±	5.95419e-05		1	150985453	156925036	85383125	393293614		0.0126046	0.0126695	0.0127546	0.0126628
Lac-AEJ|1	1.10573e+08		3.40498	±	0.0046695		0.0106803	±	0.00267752		1	129779944	158964778	42974715	331719437		0.0108344	0.0128341	0.00641959	0.0106803
Lac-AEJR |1	27220708		3.97792	±	0.00897		0.00262926	±	0.000270138		1	34131795	32785030	14745299	81662124		0.00284941	0.00264692	0.00220266	0.00262926
Lac-AEJAA|1	17624101		9.2951	±	0.0418964		0.00170232	±	0.000219411		1	20812423	23049411	9010469	52872303		0.00173747	0.00186091	0.00134599	0.00170232
Lac-AEJH |1	11611350		3.57992	±	0.00647909		0.00112155	±	0.000260181		1	12633769	17182591	5017690	34834050		0.0010547	0.00138725	0.000749545	0.00112155
Lac-AEJS |1	9988763		3.49907	±	0.00776202		0.00096482	±	0.000182878		1	11709206	13751480	4505603	29966289		0.000977514	0.00111024	0.00067305	0.00096482
Lac-AEJ[AG]|1	7.9365e+06		8.79139	±	0.0448722		0.00076659	±	0.000165876		1	8819570	11497063	3492857	23809490		0.00073628	0.000928224	0.000521765	0.00076659
Lac-AEJK |1	7.77236e+06		2.99689	±	0.00220227		0.000750736	±	0.000269339		1	6604040	13466580	3246464	23317084		0.000551322	0.00108723	0.000484959	0.000750736
Lac-AEJ[GG]|1	4.73348e+06		3.25269	±	0.00473112		0.000457209	±	9.63941e-05		1	5326934	6784522	2088989	14200445		0.000444706	0.000547753	0.000312054	0.000457209
Lac-AEJ[AV]|1	1.12881e+06		15.167	±	0.129898		0.000109033	±	3.92323e-05		1	1529941	1563947	292550	3386438		0.000127723	0.000126266	4.37013e-05	0.000109033
Lac-AEJ-Lac-AEJA |2	2.31748e+09		14.3826	±	0.00764472		0.223846	±	0.00971152		2	2555824809	2808728963	1587877928	6952431700		0.213367	0.226765	0.237198	0.223846
Lac-AEJA-Lac-AEJA |2	864220717		15.5033	±	0.00868279		0.0834755	±	0.00653089		2	921591889	1048640487	622429775	2592662151		0.0769368	0.0846628	0.0929789	0.0834755
Lac-AEJG-Lac-AEJ |2	379824026		12.7331	±	0.067528		0.0366874	±	0.00589798		2	483568460	366103372	289800246	1139472078		0.0403695	0.0295576	0.0432905	0.0366874
Lac-AEJF-Lac-AEJ |2	1.80395e+08		25.6473	±	0.00451836		0.0174244	±	0.000107461		2	208364381	217180274	115640035	541184690		0.0173948	0.0175342	0.0172744	0.0174244
Lac-AEJ-JEA|2	1.63121e+08		12.7694	±	2.28783		0.0157559	±	0.000162325		2	188139363	197253280	103970182	489362825		0.0157063	0.0159254	0.0155311	0.0157559
Lac-AEJ-Lac-AEJ |2	1.10804e+08		12.98	±	0.015557		0.0107026	±	0.000222818		2	129940720	129193190	73277327	332411237		0.0108478	0.0104305	0.0109462	0.0107026
Lac-AEJG-Lac-AEJA |2	81233383		13.7998	±	0.00893807		0.00784637	±	0.000140191		2	93790718	98795489	51113942	243700149		0.00782988	0.00797633	0.00763543	0.00784637
Lac-AEJ[L/I]-Lac-AEJ |2	7.7532e+07		23.8049	±	0.0192529		0.00748885	±	0.00030003		2	93588088	87975647	51032180	232595915		0.00781297	0.00710278	0.00762322	0.00748885
Lac-AEJF-Lac-AEJA |2	41050965		26.4546	±	0.00627551		0.00396513	±	0.000203991		2	50340015	47952452	24860428	123152895		0.00420251	0.00387148	0.00371366	0.00396513
Lac-AEJY-Lac-AEJ |2	4.13659e+07		20.3383	±	0.00637435		0.00399555	±	0.000194967		2	49012667	46707039	28377851	124097557		0.0040917	0.00377093	0.0042391	0.00399555
Lac-AEJK-Lac-AEJ |2	3.08626e+07		11.3517	±	0.0233255		0.00298103	±	0.000201785		2	37615577	37164343	17807773	92587693		0.00314024	0.00300049	0.00266014	0.00298103
Lac-AEJR-Lac-AEJ |2	29837021		12.3036	±	0.01665		0.00288197	±	0.000212636		2	37575023	34304948	17631092	89511063		0.00313686	0.00276964	0.00263374	0.00288197
Lac-AEJV-Lac-AEJ |2	2.78909e+07		19.9031	±	0.00561579		0.00269399	±	0.000103109		2	32236591	32307870	19128172	83672633		0.00269119	0.0026084	0.00285738	0.00269399
Lac-AEJS-Lac-AEJ |2	1.73155e+07		12.2608	±	0.018193		0.00167252	±	3.0226e-05		2	20476229	20495820	10974591	51946640		0.00170941	0.00165475	0.00163939	0.00167252
Lac-AEJH-Lac-AEJ |2	1.57146e+07		11.676	±	0.0201686		0.00151788	±	0.000133823		2	18356535	20066466	8720683	47143684		0.00153245	0.00162008	0.0013027	0.00151788
Lac-AEJ[L/I]-Lac-AEJA |2	1.23857e+07		24.8159	±	0.00636349		0.00119634	±	7.49667e-05		2	15480976	13745235	7930765	37156976		0.00129239	0.00110973	0.0011847	0.00119634
Lac-AEJK-Lac-AEJA |2	1.06816e+07		12.3795	±	0.014811		0.00103174	±	6.79833e-05		2	12907912	12972975	6163975	32044862		0.00107758	0.00104738	0.000920778	0.00103174
Lac-AEJY-Lac-AEJA |2	8.48857e+06		21.1892	±	0.00832818		0.000819915	±	6.50398e-05		2	10754989	9153596	5557120	25465705		0.000897854	0.000739022	0.000830126	0.000819915
Lac-AEJ[GG]-Lac-AEJ |2	9.25755e+06		11.8454	±	0.0224028		0.000894191	±	3.62155e-05		2	10216069	11258022	6298551	27772642		0.000852863	0.000908925	0.000940881	0.000894191
Lac-AEJR-Lac-AEJA |2	7590361		13.2688	±	0.00921142		0.000733157	±	7.68894e-05		2	9112574	9605201	4053308	22771083		0.000760741	0.000775483	0.000605485	0.000733157
Lac-AEJS-Lac-AEJA |2	3.99153e+06		13.3603	±	0.0116872		0.000385544	±	2.16711e-05		2	4876233	4728037	2370322	11974592		0.00040708	0.000381722	0.00035408	0.000385544
Lac-AEJH-Lac-AEJA |2	3.70204e+06		12.649	±	0.0153259		0.000357582	±	1.39148e-05		2	4244137	4602449	2259529	11106115		0.000354311	0.000371582	0.00033753	0.000357582
Lac-AEJV-Lac-AEJA |2	3.75797e+06		20.9773	±	0.00818843		0.000362984	±	1.57162e-05		2	4234654	4434879	2604370	11273903		0.00035352	0.000358053	0.000389042	0.000362984
Lac-AEJAA-Lac-AEJA |2	2.99869e+06		16.3335	±	0.0102884		0.000289645	±	3.04349e-05		2	3736159	3650045	1609859	8996063		0.000311904	0.000294689	0.000240482	0.000289645
Lac-AEJ[GG]-Lac-AEJA |2	2.02668e+06		12.8449	±	0.0155798		0.000195758	±	1.17899e-05		2	2411890	2488889	1179272	6080051		0.000201351	0.000200942	0.00017616	0.000195758
Lac-AEJM-Lac-AEJA |2	264904		23.4696	±	0.00614754		2.55872e-05	±	3.34008e-06		2	359129	273030	162554	794713		2.9981e-05	2.20433e-05	2.42824e-05	2.55872e-05
(Lac-AEJ)2-Lac-AEJA |3	492111488		18.5061	±	0.00392976		0.0475333	±	0.00346856		3	561966011	558251030	356117423	1476334464		0.0469143	0.0450708	0.053197	0.0475333
(Lac-AEJA)2-LacAEJ |3	2.89888e+08		19.3654	±	0.0027149		0.0280004	±	0.00300365		3	327624743	321591115	220447082	869662940		0.0273509	0.0259639	0.0329305	0.0280004
(Lac-AEJ)2-Lac-AEJG |3	8.93813e+07		16.8406	±	0.00943533		0.00863338	±	0.000384695		3	104152169	102352092	61639538	268143799		0.00869488	0.00826347	0.00920775	0.00863338
(Lac-AEJA)3 |3	5.34443e+07		20.1353	±	0.00848039		0.00516221	±	0.000293054		3	66103139	61884048	32345615	160332802		0.00551846	0.00499625	0.00483181	0.00516221
Lac-AEJA-LacAEJG-LacAEJ |3	33425357		17.7182	±	0.00455734		0.00322857	±	0.000132133		3	38095611	41761967	20418493	100276071		0.00318032	0.00337168	0.00305013	0.00322857
(Lac-AEJ)3 |3	22473184		17.1528	±	0.0199497		0.0021707	±	0.000133263		3	24146982	27624879	15647691	67419552		0.00201585	0.00223032	0.00233746	0.0021707
(Lac-AEJA)2-LacAEJG |3	7.75499e+06		18.4319	±	0.00536297		0.000749058	±	2.47733e-05		3	9047443	9475302	4742214	23264959		0.000755303	0.000764996	0.000708395	0.000749058
(Lac-AEJG)2-LacAEJ |3	1.38176e+06		16.0401	±	0.00917129		0.000133465	±	6.59281e-06		3	1528732	1654813	961742	4145287		0.000127622	0.000133603	0.000143666	0.000133465				M7404.1	M7404.2	M7404.3	Av.	SD
(Lac-AEJG)2-LacAEJA |3	897465		16.8196	±	0.0160772		8.66866e-05	±	1.63218e-06		3	1028679	1065088	598628	2692395		8.58767e-05	8.59907e-05	8.94234e-05	8.66866e-05		Monomers		0.480529	0.476449	0.428219	0.461732	0.0237557
(Lac-AEJG)3 |3	98577		13.7182	±	5.77639		6.34773e-06	±	4.44463e-06		3		89294	107860	197154			7.20922e-06	1.61122e-05	6.34773e-06		Dimers		0.417309	0.42546	0.457528	0.433432	0.01736
Lac-AEJA-(Lac-AEJ)3 |4	2.59638e+07		21.1526	±	0.00764446		0.00250786	±	0.000103126		4	29289582	30669421	17932536	77891539		0.00244517	0.00247612	0.00267877	0.00250786		Trimers		0	7.20922e-06	1.61122e-05	7.7738e-06	6.58988e-06
(Lac-AEJA)2-(Lac-AEJ)2 |4	2.29301e+07		21.8574	±	0.00909139		0.00221483	±	7.11619e-05		4	27187003	26323235	15279946	68790184		0.00226964	0.00212523	0.00228253	0.00221483		Tetramers		0.0068594	0.00657816	0.00709499	0.00684418	0.000211269
(Lac-AEJA)3-Lac-AEJ |4	7165788		22.5098	±	0.00931896		0.000692147	±	1.00566e-05		4	8440477	8492846	4564041	21497364		0.000704632	0.000685676	0.000681779	0.000692147		Pentamers		0.000659744	0.000624726	0.000645721	0.000643397	1.43901e-05
(Lac-AEJ)3-Lac-AEJG |4	4.48628e+06		19.7328	±	0.00602111		0.000433332	±	4.19879e-05		4	5007418	5082566	3368861	13458845		0.000418032	0.000410345	0.000503242	0.000433332		Crosslinking index		0.210501	0.214502	0.230672	0.218558	0.00871999
Lac-AEJA-(Lac-AEJ)2-Lac-AEJG |4	3.90403e+06		20.3741	±	0.00674722		0.000377092	±	2.51106e-05		4	4741750	4281312	2689035	11712097		0.000395853	0.000345655	0.00040169	0.000377092
(Lac-AEJA)4 |4	2.93966e+06		22.9408	±	0.00603742		0.000283944	±	2.07214e-05		4	3714499	3342362	1762129	8818990		0.000310096	0.000269848	0.000263228	0.000283944
(Lac-AEJ)4 |4	1538114		20.0186	±	0.00859863		0.000148567	±	6.70366e-06		4	1820783	1743734	1049825	4614342		0.000152004	0.000140782	0.000156823	0.000148567
(Lac-AEJA)2-Lac-AEJ-Lac-AEJG |4	1004054		21.0017	±	0.01055		9.69821e-05	±	3.75647e-06		4	1220601	1150947	640614	3012162		0.000101899	9.29226e-05	9.56953e-05	9.69821e-05
(Lac-AEJA)3-Lac-AEJG |4	286480		21.6228	±	0.00984514		2.76713e-05	±	3.10778e-06		4	379855	311803	167783	859441		3.17112e-05	2.51736e-05	2.50635e-05	2.76713e-05
(Lac-AEJG)4 |4	221584		20.787	±	3.2329		1.42686e-05	±	1.19636e-05		4	363726	79441		443167		3.03648e-05	6.41373e-06		1.42686e-05
(Lac-AEJA)2-(Lac-AEJG)2 |4	41302		24.0989	±	0		1.32979e-06	±	0		4			41302	41302				6.16972e-06	1.32979e-06
(Lac-AEJA)2-(Lac-AEJ)3 |5	2.12848e+06		23.7125	±	0.00576017		0.000205591	±	3.09362e-06		5	2505052	2529947	1350455	6385454		0.000209128	0.000204257	0.000201732	0.000205591
Lac-AEJA-(Lac-AEJ)4 |5	1634951		23.1067	±	0.00466183		0.000157921	±	3.94376e-06		5	1905905	1904681	1094267	4904853		0.00015911	0.000153776	0.000163462	0.000157921
(Lac-AEJA)4-Lac-AEJ |5	1.18246e+06		24.6296	±	0.010225		0.000114214	±	1.28012e-05		5	1567815	1285651	693903	3547369		0.000130885	0.000103798	0.000103656	0.000114214
(Lac-AEJA)3-(Lac-AEJ)2 |5	1342476		24.2597	±	0.00641762		0.00012967	±	8.15251e-06		5	1512089	1556175	959164	4027428		0.000126233	0.000125639	0.00014328	0.00012967
(Lac-AEJA)5 |5	366080		25.0753	±	0.00541248		3.53598e-05	±	1.57376e-06		5	411916	461457	224866	1098239		3.43878e-05	3.72561e-05	3.35906e-05	3.53598e-05
	1.03531e+10											11978556614	12386088456	6694311407	31058956477					1

## Sheet: R20291 vs M7704
	R20291										M7404
Inferred structure	RT				Intensity		Abundance				RT			Intensity		Abundance			Oligomerisation
	Av		SD		Av		Av		SD		Av		SD	Av		Av		SD	state
Lac-AEJA |1	6.6405	±	0.0229744		4.07938e+09		0.36007	±	0.0382917		6.51812	±	0.118867	3.34777e+09		0.323364	±	0.0074124	1
Lac-AEJF |1	20.6984	±	0.0114131		5.2783e+08		0.0465893	±	0.00869985		20.6986	±	0.00641772	5.08306e+08		0.0490976	±	0.00297635	1
Lac-AEJG |1	4.04312	±	0.00817704		4.84895e+08		0.0427996	±	0.00949129		4.04618	±	0.00522496	351829000		0.0339834	±	0.00883331	1
Lac-AEJ[L/I] |1	18.1303	±	0.0131979		2.43648e+08		0.0215057	±	0.00322162		18.1447	±	0.00512334	1.81521e+08		0.0175332	±	0.00177562	1
Lac-AEJV |1	13.5432	±	0.00839435		2.16497e+08		0.0191092	±	0.003696		13.5649	±	0.0143289	1.22221e+08		0.0118054	±	0.000716126	1
Lac-AEJY |1	15.4507	±	0.013599		1.62258e+08		0.0143219	±	0.00185223		15.4552	±	0.00430458	1.31098e+08		0.0126628	±	5.95419e-05	1
Lac-AEJ|1	3.40262	±	0.00655405		1.54716e+08		0.0136561	±	0.0030896		3.40498	±	0.0046695	1.10573e+08		0.0106803	±	0.00267752	1
Lac-AEJR |1	3.97536	±	0.0134584		32896168		0.0029036	±	0.000264184		3.97792	±	0.00897	27220708		0.00262927	±	0.000270138	1
Lac-AEJAA|1	9.17644	±	0.0518089		1.67528e+07		0.0014787	±	4.71629e-05		9.2951	±	0.0418964	17624101		0.00170232	±	0.000219411	1
Lac-AEJH |1	3.57943	±	0.0107455		14282265		0.00126063	±	0.00014521		3.57992	±	0.00647909	11611350		0.00112155	±	0.000260181	1
Lac-AEJS |1	3.49552	±	0.00624594		1.18072e+07		0.00104217	±	0.00014289		3.49907	±	0.00776202	9988763		0.000964821	±	0.000182878	1
Lac-AEJK |1	2.99694	±	0.00361854		8.44967e+06		0.000745816	±	2.65363e-05		2.99689	±	0.00220227	7.77236e+06		0.000766591	±	0.000269339	1
Lac-AEJ[GG]|1	3.25217	±	0.00316988		6.37566e+06		0.000562752	±	6.48266e-05		3.25269	±	0.00473112	4.73348e+06		0.000750737	±	9.63941e-05	1
Lac-AEJ[AG]|1	8.74765	±	0.0407472		5.18598e+06		0.000457744	±	6.38749e-05		8.79139	±	0.0448722	7.9365e+06		0.00045721	±	0.000165876	1
Lac-AEJ[AV]|1	15.3426	±	0.0115263		1.17258e+06		0.000103499	±	2.99858e-05		15.167	±	0.129898	1.12881e+06		0.000109033	±	3.92323e-05	1
Lac-AEJ-Lac-AEJA |2	14.6478	±	0.0171109		1696843076		0.149773	±	0.00511986		14.3826	±	0.00764472	2.31748e+09		0.223847	±	0.00971152	2
Lac-AEJA-Lac-AEJA |2	15.5082	±	0.0132321		9.60937e+08		0.0848178	±	0.00535731		15.5033	±	0.00868279	864220717		0.0834756	±	0.00653089	2
Lac-AEJG-Lac-AEJ |2	12.7427	±	0.0616074		4.23483e+08		0.037379	±	0.00402018		12.7331	±	0.067528	379824026		0.0366874	±	0.00589798	2				R20291				M7404			P value
Lac-AEJF-Lac-AEJ |2	25.6401	±	0.00505047		1.81984e+08		0.0160629	±	0.00101522		25.6473	±	0.00451836	1.80395e+08		0.0174245	±	0.000107461	2			Monomers	0.528143	±	0.0209153		0.461732	±	0.0237557	0.022
Lac-AEJ-JEA|2	14.3687	±	0.0165319		1.61025e+08		0.014213	±	0.000449757		12.7694	±	2.28783	1.63121e+08		0.015756	±	0.000162325	2			Dimers	0.361235	±	0.0147778		0.433432	±	0.01736	0.005
Lac-AEJ-Lac-AEJ |2	12.9724	±	0.0425701		1.43322e+08		0.0126505	±	0.00134323		12.98	±	0.015557	1.10804e+08		0.0107026	±	0.000222818	2			Trimers	0.102717	±	0.00638103		0.097348	±	0.00665899	NS
Lac-AEJG-Lac-AEJA |2	13.7783	±	0.016308		1.07724e+08		0.00950831	±	0.000684994		13.7998	±	0.00893807	81233383		0.00784638	±	0.000140191	2			Tetramers	0.00723889	±	0.000787918		0.00684418	±	0.000211269	NS
Lac-AEJ[L/I]-Lac-AEJ |2	23.7959	±	0.0269302		101373951		0.00894784	±	0.000404697		23.8049	±	0.0192529	7.7532e+07		0.00748886	±	0.00030003	2			Pentamers	0.000665598	±	3.51917e-05		0.000643397	±	1.43901e-05	NS
Lac-AEJF-Lac-AEJA |2	26.4515	±	0.00932359		46540005		0.00410789	±	0.000451418		26.4546	±	0.00627551	41050965		0.00396514	±	0.000203991	2			Crosslinking index	0.216457	±	0.00930848		0.218558	±	0.00871999	NS
Lac-AEJY-Lac-AEJ |2	20.3391	±	0.0128417		4.64308e+07		0.00409824	±	0.00033896		20.3383	±	0.00637435	4.13659e+07		0.00399555	±	0.000194967	2			SUM	1				1
Lac-AEJV-Lac-AEJ |2	19.9001	±	0.0182084		42183217		0.00372333	±	0.000295611		19.9031	±	0.00561579	2.78909e+07		0.00298103	±	0.000103109	2
Lac-AEJR-Lac-AEJ |2	12.2664	±	0.0150104		33385257		0.00294677	±	0.000253426		12.3036	±	0.01665	29837021		0.00288198	±	0.000212636	2
Lac-AEJK-Lac-AEJ |2	11.3137	±	0.0230316		32787547		0.00289402	±	0.000282324		11.3517	±	0.0233255	3.08626e+07		0.002694	±	0.000201785	2
Lac-AEJ[L/I]-Lac-AEJA |2	24.8207	±	0.010575		2.50195e+07		0.00220836	±	0.000306625		24.8159	±	0.00636349	1.23857e+07		0.00167252	±	7.49667e-05	2
Lac-AEJS-Lac-AEJ |2	12.2509	±	0.0171632		1.89026e+07		0.00166845	±	6.68443e-05		12.2608	±	0.018193	1.73155e+07		0.00151788	±	3.0226e-05	2
Lac-AEJH-Lac-AEJ |2	11.6376	±	0.0217089		16927553		0.00149412	±	0.000263838		11.676	±	0.0201686	1.57146e+07		0.00119634	±	0.000133823	2
Lac-AEJK-Lac-AEJA |2	12.3437	±	0.014697		1.14952e+07		0.00101464	±	0.000100841		12.3795	±	0.014811	1.06816e+07		0.00103174	±	6.79833e-05	2
Lac-AEJY-Lac-AEJA |2	21.1936	±	0.0098756		1.10655e+07		0.0009767	±	5.71952e-05		21.1892	±	0.00832818	8.48857e+06		0.000819916	±	6.50398e-05	2
Lac-AEJ[GG]-Lac-AEJ |2	11.8055	±	0.0203286		10242093		0.000904025	±	9.0753e-05		11.8454	±	0.0224028	9.25755e+06		0.000894192	±	3.62155e-05	2
Lac-AEJR-Lac-AEJA |2	13.2242	±	0.0326019		10232002		0.000903135	±	9.31609e-05		13.2688	±	0.00921142	7590361		0.000733158	±	7.68894e-05	2
Lac-AEJV-Lac-AEJA |2	20.982	±	0.0113618		6.91633e+06		0.000610475	±	3.76012e-05		20.9773	±	0.00818843	3.75797e+06		0.000385544	±	1.57162e-05	2
Lac-AEJS-Lac-AEJA |2	13.3325	±	0.0139825		5.63382e+06		0.000497273	±	1.90082e-05		13.3603	±	0.0116872	3.99153e+06		0.000357582	±	2.16711e-05	2
Lac-AEJAA-Lac-AEJA |2	16.3364	±	0.00728355		5.41878e+06		0.000478293	±	9.58517e-05		16.3335	±	0.0102884	2.99869e+06		0.000362984	±	3.04349e-05	2
Lac-AEJH-Lac-AEJA |2	12.5431	±	0.0539244		4486924		0.000396041	±	5.27842e-05		12.649	±	0.0153259	3.70204e+06		0.000289645	±	1.39148e-05	2
Lac-AEJ[GG]-Lac-AEJA |2	12.814	±	0.0111717		2.81078e+06		0.000248096	±	2.48386e-05		12.8449	±	0.0155798	2.02668e+06		0.000195759	±	1.17899e-05	2
Lac-AEJM-Lac-AEJA |2	23.4641	±	0.0178963		252411		2.22792e-05	±	6.16212e-06		23.4696	±	0.00614754	264904		2.55873e-05	±	3.34008e-06	2
(Lac-AEJ)2-Lac-AEJA |3	18.5037	±	0.0207859		5.41194e+08		0.0477689	±	0.00211561		18.5061	±	0.00392976	492111488		0.0475334	±	0.00346856	3
(Lac-AEJA)2-LacAEJ |3	19.3599	±	0.0204455		3.60147e+08		0.0317886	±	0.0025034		19.3654	±	0.0027149	2.89888e+08		0.0280004	±	0.00300365	3
(Lac-AEJ)2-Lac-AEJG |3	16.8506	±	0.00647834		1.0005e+08		0.00883099	±	0.000851187		16.8406	±	0.00943533	8.93813e+07		0.00863339	±	0.000384695	3
(Lac-AEJA)3 |3	20.1269	±	0.0203531		80213965		0.00708014	±	0.000549422		20.1353	±	0.00848039	5.34443e+07		0.00516222	±	0.000293054	3
Lac-AEJA-LacAEJG-LacAEJ |3	17.7204	±	0.00805787		4.31033e+07		0.00380454	±	0.000366206		17.7182	±	0.00455734	33425357		0.00322858	±	0.000132133	3
(Lac-AEJ)3 |3	17.1639	±	0.00936283		2.75694e+07		0.00243344	±	0.000338039		17.1528	±	0.0199497	22473184		0.0021707	±	0.000133263	3
(Lac-AEJA)2-LacAEJG |3	18.4287	±	0.0169882		1.10573e+07		0.000975979	±	2.74342e-05		18.4319	±	0.00536297	7.75499e+06		0.000749059	±	2.47733e-05	3
(Lac-AEJG)2-LacAEJ |3	16.0495	±	0.00900976		1694282		0.000149547	±	8.67607e-06		16.0401	±	0.00917129	1.38176e+06		0.000133465	±	6.59281e-06	3
(Lac-AEJG)2-LacAEJA |3	16.8343	±	0.000704622		1130438		6.65193e-05	±	1.2595e-05		16.8196	±	0.0160772	897465		8.66867e-05	±	1.63218e-06	3
(Lac-AEJA)2-(Lac-AEJ)2 |4	21.8605	±	0.00357615		2.80234e+07		0.00247351	±	0.000302302		21.8574	±	0.00909139	2.29301e+07		6.34774e-06	±	7.11619e-05	4
Lac-AEJA-(Lac-AEJ)3 |4	21.1635	±	0.0109073		2.5995e+07		0.00229447	±	0.000246821		21.1526	±	0.00764446	2.59638e+07		0.00250786	±	0.000103126	4
(Lac-AEJA)3-Lac-AEJ |4	22.5051	±	0.00601103		1.08473e+07		0.000957446	±	0.000110163		22.5098	±	0.00931896	7165788		0.00221483	±	1.00566e-05	4
Lac-AEJA-(Lac-AEJ)2-Lac-AEJG |4	20.3793	±	0.0131951		4.80081e+06		0.000419948	±	5.79172e-05		20.3741	±	0.00674722	3.90403e+06		0.000692148	±	2.51106e-05	4
(Lac-AEJ)3-Lac-AEJG |4	19.7302	±	0.0237474		4757766		0.000423747	±	6.85386e-05		19.7328	±	0.00602111	4.48628e+06		0.000433333	±	4.19879e-05	4
(Lac-AEJA)4 |4	22.9353	±	0.0115543		4.25353e+06		0.00037544	±	4.44242e-05		22.9408	±	0.00603742	2.93966e+06		0.000377093	±	2.07214e-05	4
(Lac-AEJ)4 |4	20.0183	±	0.0201768		1.9023e+06		0.000167908	±	2.37694e-05		20.0186	±	0.00859863	1538114		0.000283944	±	6.70366e-06	4
(Lac-AEJA)2-Lac-AEJ-Lac-AEJG |4	21.0156	±	0.00933779		1.46418e+06		0.000129237	±	5.67167e-06		21.0017	±	0.01055	1004054		0.000148567	±	3.75647e-06	4
(Lac-AEJA)3-Lac-AEJG |4	21.6291	±	0.00447695		347571		3.06786e-05	±	6.01774e-06		21.6228	±	0.00984514	286480		9.69822e-05	±	3.10778e-06	4
(Lac-AEJA)2-(Lac-AEJG)2 |4	24.1095	±	0.0151332		78106.5		4.59608e-06	±	1.79326e-07		24.0989	±	0	41302		2.76713e-05	±	0	4
(Lac-AEJG)4 |4	24.0831	±	0.0504621		77597.5		4.56613e-06	±	5.35039e-07		20.787	±	3.2329	221584		1.42686e-05	±	1.19636e-05	4
(Lac-AEJA)2-(Lac-AEJ)3 |5	23.7036	±	0.0185425		2.38085e+06		0.000210147	±	2.5634e-05		23.7125	±	0.00576017	2.12848e+06		0.000205592	±	3.09362e-06	5
(Lac-AEJA)4-Lac-AEJ |5	24.6333	±	0.0038495		1.63659e+06		0.000144455	±	1.97248e-05		24.6296	±	0.010225	1.18246e+06		0.000157921	±	1.28012e-05	5
(Lac-AEJA)3-(Lac-AEJ)2 |5	24.2547	±	0.0157542		1.59995e+06		0.00014122	±	1.33111e-05		24.2597	±	0.00641762	1342476		0.000114214	±	8.15251e-06	5
Lac-AEJA-(Lac-AEJ)4 |5	23.0989	±	0.016145		1.47918e+06		0.000130561	±	1.51341e-05		23.1067	±	0.00466183	1634951		0.000129671	±	3.94376e-06	5
(Lac-AEJA)5 |5	25.0837	±	0.00222595		484314		4.27483e-05	±	6.16907e-06		25.0753	±	0.00541248	366080		3.53599e-05	±	1.57376e-06	5
			SUM		11329858864		1						SUM	1.0353e+10		1
