# Supplementary material for: PGFinder, a novel analysis pipeline for the consistent, reproducible, and high-resolution structural analysis of bacterial peptidoglycans
Source: eLife. 2021 Sep 28;10:e70597. doi: 10.7554/eLife.70597 (PMC8478412; doi:10.7554/eLife.70597)
Supplement: Table 1—source data 2. [file elife-70597-table1-data2.xlsx]

## Sheet: WT1
RAW OUTPUT (WT1 SAMPLE)														CONSOLIDATED DATA
ID	xicStart	xicEnd	feature	corrMax	ionCount	chargeOrder	maxIsotopeCount	rt	mwMonoisotopic	theo_mwMonoisotopic	inferredStructure	maxIntensity		Structure	Intensity	RT	Abundance	Obs	Theo	Dppm	Oligomerisation state
872	9.53935	9.58297	872	0.990293	3	1	2	9.55114	478.179	478.1799	GM (Anhydro) |0	1002697		GM|0	32398316	3.60843	0.0399574	498.205	498.206	2.69032	0
282	3.82239	4.0587	282	0.998157	39	1	2	3.92131	478.179	478.1799	GM (Anhydro) |0	429009		GM (Anhydro) |0	2077721	9.55114	0.00256249	478.179	478.18	2.4506	0
455	5.35851	5.60645	455	0.999366	36	1	2	5.48508	478.179	478.1799	GM (Anhydro) |0	646015		GM (Deacetyl) |0	1455546	2.56662	0.00179515	456.194	456.196	3.40206	0
71	2.19844	2.34311	71	0.998264	13	1	2	2.25189	456.194	456.1956	GM (Deacetyl) |0	536579		GM (x2)|0,GM-GM|0	911535	10.0703	0.00112421	976.384	976.386	1.88614	0
111	2.46376	2.64917	111	0.998421	43	1;2	2	2.56662	456.194	456.1956	GM (Deacetyl) |0	918967		GM (x2) (Deacetyl) |0	846237	6.83401	0.00104368	934.373	934.375	3.04578	0
569	6.79089	6.8097	569	0.971872	3	2	3	6.80369	956.355	956.3598000000001	GM (x2) (Anhydro) |0	120248		GM (x2) (Anhydro) |0	198699	6.80369	0.000245059	956.355	956.36	5.32251	0
579	6.86493	6.90954	579	0.986281	5	2	3	6.88397	956.355	956.3598000000001	GM (x2) (Anhydro) |0	78451		GM-AEJA|1	271842113	9.97835	0.335267	941.405	941.408	2.86514	1
556	6.72933	6.98742	556	0.988527	37	2	3	6.83401	934.373	934.3755000000001	GM (x2) (Deacetyl) |0	846237		GM-AEJ|1	118806672	6.54955	0.146526	870.368	870.371	2.82926	1
938	10.0386	10.1164	938	0.965707	7	2	3	10.0703	976.384	976.3860000000001,976.386	GM (x2)|0,GM-GM|0	911535		GM-AEJKR|1	72429951	9.49024	0.0893291	1154.56	1154.57	2.78893	1
1862	17.3594	17.5035	1862	0.997462	20	1	2	17.4335	678.258	678.2596	GM-AE (Anhydro) |1	601632		GM-AE|1	16500510	9.51271	0.0203504	698.284	698.286	3.1261	1
1505	13.8739	14.0874	1505	0.998772	55	2;1	2	13.9662	850.343	850.3444	GM-AEJ (Anhydro) |1	5175663		GM-AEJG|1	6011750	7.78159	0.00741439	927.39	927.392	2.36688	1
725	8.14861	8.16644	725	0.993603	3	2	2	8.1568	850.342	850.3444	GM-AEJ (Anhydro) |1	52981		GM-AEJ (Anhydro) |1	5358618	13.9662	0.00660887	850.343	850.344	2.21556	1
956	10.1824	10.2278	956	0.992962	4	2	2	10.1984	850.341	850.3444	GM-AEJ (Anhydro) |1	129974		GM-AEJA (Anhydro) |1	4368964	16.5449	0.00538832	921.38	921.381	2.16705	1
383	4.68157	4.82238	383	0.987942	24	2	2	4.75397	828.357	828.3601	GM-AEJ (Deacetyl) |1	114286		GM-AEJGA|1	1859689	9.38416	0.00229359	998.426	998.429	3.08395	1
1968	18.5905	18.8967	1968	0.941607	37	2	3	18.7672	1702.7	1702.7042	GM-AEJ-GM-AEJ (Anhydro) |2	1271074		GM-AEJKR (Anhydro) |1	1406735	14.8174	0.00173495	1134.54	1134.54	2.98552	1
2029	19.362	20.2176	2029	0.990309	199	2;3	3	19.6764	1773.74	1773.7413,1773.7413	GM-AEJ-GM-AEJA (Anhydro) |2,GM-AEJA-GM-AEJ (Anhydro) |2	3191122		GM-AE (Anhydro) |1	601632	17.4335	0.000742003	678.258	678.26	2.83498	1
1689	15.689	15.9003	1689	0.946448	35	3;2	3	15.7803	1793.76	1793.7675,1793.7675	GM-AEJ-GM-AEJA|2,GM-AEJA-GM-AEJ|2	117595		GM-AEJAA|1	503430	11.318	0.000620889	1012.44	1012.44	2.53429	1
1616	14.855	15.6314	1616	0.98916	177	3;2	3	15.0784	1793.76	1793.7675,1793.7675	GM-AEJ-GM-AEJA|2,GM-AEJA-GM-AEJ|2	21533552		GM-GM-AEJA|1	452417	13.0794	0.000557973	1419.58	1419.59	2.73765	1
1605	14.7185	14.7759	1605	0.940322	11	2;3	5	14.7515	1793.76	1793.7675,1793.7675	GM-AEJ-GM-AEJA|2,GM-AEJA-GM-AEJ|2	5562905		GM-AEJA (Deacetyl) |1	408910	8.49692	0.000504316	899.394	899.397	3.47184	1
1580	14.5118	14.5822	1580	0.957965	13	3;2	3	14.5391	1793.76	1793.7675,1793.7675	GM-AEJ-GM-AEJA|2,GM-AEJA-GM-AEJ|2	470499		M-AEJA|1	321575	8.44553	0.000396604	738.325	738.328	4.62445	1
1541	14.1073	14.4034	1541	0.992631	60	2;3	3	14.221	1722.73	1722.7304	GM-AEJ-GM-AEJ|2	5121347		GM-GM-AEJ|1	225937	11.2535	0.000278652	1348.55	1348.55	1.98361	1
1750	16.4492	16.6695	1750	0.99982	59	2;1	2	16.5449	921.38	921.3815	GM-AEJA (Anhydro) |1	4032400		M-AEJ|1	208617	4.53759	0.000257291	667.289	667.291	3.57585	1
1268	12.2838	12.3793	1268	0.999627	11	2	3	12.3279	921.379	921.3815	GM-AEJA (Anhydro) |1	336564		GM-AEJ (Deacetyl) |1	114286	4.75397	0.000140951	828.357	828.36	3.19143	1
749	8.40136	8.595	749	0.998883	33	2	3	8.49692	899.394	899.3972	GM-AEJA (Deacetyl) |1	408910		GM-GM-AEJKR|1	64818	12.1466	7.99411e-05	1632.74	1632.75	2.52162	1
2177	20.8771	20.9098	2177	0.976928	3	3	4	20.8925	2626.09	2626.1011,2626.1011	GM-AEJA-GM-AEJ-GM-AEJ (Anhydro) |3,GM-AEJ-GM-AEJ-GM-AEJA (Anhydro) |3	38454		M-AEJKR|1	62909	8.09594	7.75867e-05	951.485	951.487	2.91904	1
2188	21.0367	21.2538	2188	0.958722	23	3	5	21.1495	2626.09	2626.1011,2626.1011	GM-AEJA-GM-AEJ-GM-AEJ (Anhydro) |3,GM-AEJ-GM-AEJ-GM-AEJA (Anhydro) |3	94372		GM-AEJA-GM-AEJA|2,GM-AEJAA-GM-AEJ|2	134399331	16.0268	0.165757	1864.8	1864.8	2.19297	2
2267	21.596	21.664	2267	0.946741	6	3	4	21.6272	2626.1	2626.1011,2626.1011	GM-AEJA-GM-AEJ-GM-AEJ (Anhydro) |3,GM-AEJ-GM-AEJ-GM-AEJA (Anhydro) |3	68312		GM-AEJKR-GM-AEJA|2	42439111	14.8319	0.0523409	2077.96	2077.96	3.09286	2
1867	17.3895	17.5035	1867	0.971235	11	3	4	17.448	2646.12	2646.1273,2646.1273	GM-AEJA-GM-AEJ-GM-AEJ|3,GM-AEJ-GM-AEJ-GM-AEJA|3	281942		GM-AEJ-GM-AEJA|2,GM-AEJA-GM-AEJ|2	27684551	15.0784	0.0341438	1793.76	1793.77	2.28504	2
2132	20.4108	20.9486	2132	0.994769	123	3;2	3	20.5676	1844.77	1844.7784,1844.7784	GM-AEJA-GM-AEJA (Anhydro) |2,GM-AEJAA-GM-AEJ (Anhydro) |2	7016930		GM-AEJKR-GM-AEJ|2	7901364	14.2197	0.00974488	2006.92	2006.93	3.17659	2
2193	21.0367	21.2256	2193	0.978661	16	2	3	21.1198	1844.77	1844.7784,1844.7784	GM-AEJA-GM-AEJA (Anhydro) |2,GM-AEJAA-GM-AEJ (Anhydro) |2	57523		GM-AEJA-GM-AEJA (Anhydro) |2,GM-AEJAA-GM-AEJ (Anhydro) |2	7202583	20.5676	0.00888307	1844.77	1844.78	2.43974	2
2225	21.2837	21.3165	2225	0.944436	4	2	3	21.3013	1844.77	1844.7784,1844.7784	GM-AEJA-GM-AEJA (Anhydro) |2,GM-AEJAA-GM-AEJ (Anhydro) |2	30425		GM-AEJKR-GM-AEJA (Anhydro) |2	6107337	18.648	0.00753228	2057.93	2057.94	2.25512	2
2103	20.0972	20.2232	2103	0.994685	29	2;3	3	20.17	1844.77	1844.7784,1844.7784	GM-AEJA-GM-AEJA (Anhydro) |2,GM-AEJAA-GM-AEJ (Anhydro) |2	97705		GM-AEJ-GM-AEJ|2	5121347	14.221	0.00631624	1722.73	1722.73	2.95158	2
1639	15.1411	15.1833	1639	0.910451	9	2;3	4	15.1633	1822.79	1822.7941,1822.7941	GM-AEJA-GM-AEJA (Deacetyl) |2,GM-AEJAA-GM-AEJ (Deacetyl) |2	151629		GM-AEJG-GM-AEJA|2,GM-AEJGA-GM-AEJ|2	3612229	14.6691	0.00445502	1850.78	1850.79	2.30096	2
1936	18.1978	18.2723	1936	0.909721	6	2	3	18.2324	1864.8	1864.8046,1864.8046	GM-AEJA-GM-AEJA|2,GM-AEJAA-GM-AEJ|2	46618		GM-AEJ-GM-AEJA (Anhydro) |2,GM-AEJA-GM-AEJ (Anhydro) |2	3191122	19.6764	0.00393566	1773.74	1773.74	1.92335	2
1677	15.563	17.4679	1677	0.995578	468	3;2	3	16.0268	1864.8	1864.8046,1864.8046	GM-AEJA-GM-AEJA|2,GM-AEJAA-GM-AEJ|2	134242106		GM-AEJKR-GM-AEJ (Anhydro) |2	1545736	18.0628	0.00190638	1986.9	1986.9	1.66466	2
1897	17.7491	17.8681	1897	0.931743	13	3;2	3	17.8074	1864.8	1864.8046,1864.8046	GM-AEJA-GM-AEJA|2,GM-AEJAA-GM-AEJ|2	59429		GM-AEJGA-GM-AEJA|2	1448902	15.3289	0.00178696	1921.82	1921.83	2.69916	2
1888	17.6566	17.7148	1888	0.97454	7	2;3	3	17.6826	1864.79	1864.8046,1864.8046	GM-AEJA-GM-AEJA|2,GM-AEJAA-GM-AEJ|2	51178		GM-AEJ-GM-AEJ (Anhydro) |2	1271074	18.7672	0.00156764	1702.7	1702.7	4.08817	2
2297	21.8919	22.1547	2297	0.979338	39	3;2	5	22.0175	2697.13	2697.1382,2697.1382,2697.1382	GM-AEJAA-GM-AEJ-GM-AEJ (Anhydro) |3,GM-AEJA-GM-AEJ-GM-AEJA (Anhydro) |3,GM-AEJ-GM-AEJA-GM-AEJA (Anhydro) |3	386501		GM-AEJAA-GM-AEJA|2	631527	16.5452	0.000778873	1935.84	1935.84	1.70464	2
2230	21.3263	21.8528	2230	0.98139	98	2;3	5	21.5956	2697.13	2697.1382,2697.1382,2697.1382	GM-AEJAA-GM-AEJ-GM-AEJ (Anhydro) |3,GM-AEJA-GM-AEJ-GM-AEJA (Anhydro) |3,GM-AEJ-GM-AEJA-GM-AEJA (Anhydro) |3	591301		GM-AEJG-GM-AEJ|2	466582	13.9046	0.000575443	1779.75	1779.75	2.87819	2
2312	22.0204	22.0293	2312	0.936789	3	3	5	22.0249	2768.17	2768.1753,2768.1753	GM-AEJAA-GM-AEJ-GM-AEJA (Anhydro) |3,GM-AEJA-GM-AEJA-GM-AEJA (Anhydro) |3	58351		GM-GM-AEJA-GM-AEJA|2,GM-GM-AEJAA-GM-AEJ|2	245145	17.5114	0.000302341	2342.97	2342.98	4.57704	2
2327	22.0993	22.64	2327	0.943696	89	2;3	5	22.3681	2768.17	2768.1753,2768.1753	GM-AEJAA-GM-AEJ-GM-AEJA (Anhydro) |3,GM-AEJA-GM-AEJA-GM-AEJA (Anhydro) |3	1995818		M-AEJA-GM-AEJA|2,M-AEJAA-GM-AEJ|2	181203	16.6969	0.000223481	1661.72	1661.73	1.16619	2
1969	18.6057	18.7205	1969	0.965685	7	3	4	18.6405	2788.2	2788.2015,2788.2015	GM-AEJAA-GM-AEJ-GM-AEJA|3,GM-AEJA-GM-AEJA-GM-AEJA|3	399468		GM-AEJG-GM-AEJA (Anhydro) |2,GM-AEJGA-GM-AEJ (Anhydro) |2	175800	19.1337	0.000216817	1830.76	1830.76	0.217103	2
1985	18.7743	18.9751	1985	0.985062	43	4;3;2	5	18.8619	2788.19	2788.2015,2788.2015	GM-AEJAA-GM-AEJ-GM-AEJA|3,GM-AEJA-GM-AEJA-GM-AEJA|3	15723971		GM-AEJGA-GM-AEJA (Anhydro) |2	168161	19.7478	0.000207396	1901.79	1901.8	2.82412	2
2066	19.8169	19.8846	2066	0.947791	5	3	3	19.8495	2788.19	2788.2015,2788.2015	GM-AEJAA-GM-AEJ-GM-AEJA|3,GM-AEJA-GM-AEJA-GM-AEJA|3	38528		GM-AEJA-GM-AEJA (Deacetyl) |2,GM-AEJAA-GM-AEJ (Deacetyl) |2	151629	15.1633	0.000187007	1822.79	1822.79	4.4597	2
2053	19.6103	19.6989	2053	0.922419	8	3	3	19.6567	2788.2	2788.2015,2788.2015	GM-AEJAA-GM-AEJ-GM-AEJA|3,GM-AEJA-GM-AEJA-GM-AEJA|3	49312		GM-AEJAA-GM-AEJA (Anhydro) |2	113937	21.1768	0.00014052	1915.81	1915.82	1.26813	2
2001	19.0349	19.3512	2001	0.996261	25	3	5	19.1417	2788.2	2788.2015,2788.2015	GM-AEJAA-GM-AEJ-GM-AEJA|3,GM-AEJA-GM-AEJA-GM-AEJA|3	202197		GM-AEJG-GM-AEJ (Deacetyl) |2	32053	24.3723	3.95315e-05	1737.75	1737.74	-7.52009	2
1905	17.8379	18.0321	1905	0.94939	32	3;2	5	17.9436	2717.16	2717.1644,2717.1644,2717.1644	GM-AEJAA-GM-AEJ-GM-AEJ|3,GM-AEJA-GM-AEJ-GM-AEJA|3,GM-AEJ-GM-AEJA-GM-AEJA|3	1696459		GM-AEJAA-GM-AEJ-GM-AEJA|3,GM-AEJA-GM-AEJA-GM-AEJA|3	16413476	18.8619	0.020243	2788.19	2788.2	3.55814	3
1944	18.2723	18.4627	1944	0.987786	34	3;2	5	18.3636	2717.16	2717.1644,2717.1644,2717.1644	GM-AEJAA-GM-AEJ-GM-AEJ|3,GM-AEJA-GM-AEJ-GM-AEJA|3,GM-AEJ-GM-AEJA-GM-AEJA|3	1543596		GM-AEJAA-GM-AEJ-GM-AEJ|3,GM-AEJA-GM-AEJ-GM-AEJA|3,GM-AEJ-GM-AEJA-GM-AEJA|3	3299706	17.9436	0.00406958	2717.16	2717.16	2.68871	3
1920	18.0864	18.1621	1920	0.967569	7	3	4	18.1162	2717.16	2717.1644,2717.1644,2717.1644	GM-AEJAA-GM-AEJ-GM-AEJ|3,GM-AEJA-GM-AEJ-GM-AEJA|3,GM-AEJ-GM-AEJA-GM-AEJA|3	59651		GM-AEJAA-GM-AEJ-GM-AEJA (Anhydro) |3,GM-AEJA-GM-AEJA-GM-AEJA (Anhydro) |3	2054169	22.3681	0.00253344	2768.17	2768.18	2.60798	3
2172	20.8715	20.9157	2172	0.938775	8	2;3	3	20.8977	1915.81	1915.8155	GM-AEJAA-GM-AEJA (Anhydro) |2	46705		GM-AEJKR-GM-AEJA-GM-AEJA|3	1962214	17.5376	0.00242003	3001.35	3001.36	4.35404	3
2204	21.1362	21.2301	2204	0.902054	18	2;3	3	21.1768	1915.81	1915.8155	GM-AEJAA-GM-AEJA (Anhydro) |2	67232		GM-AEJAA-GM-AEJ-GM-AEJ (Anhydro) |3,GM-AEJA-GM-AEJ-GM-AEJA (Anhydro) |3,GM-AEJ-GM-AEJA-GM-AEJA (Anhydro) |3	977802	21.5956	0.00120594	2697.13	2697.14	1.91074	3
2012	19.2191	19.2722	2012	0.926536	6	3	4	19.2432	2859.24	2859.2386	GM-AEJAA-GM-AEJA-GM-AEJA|3	119064		GM-AEJKR-GM-AEJA-GM-AEJA (Anhydro) |3	910579	21.0171	0.00112303	2981.33	2981.33	2.31024	3
1754	16.4822	16.6384	1754	0.976636	40	2;3	4	16.5452	1935.84	1935.8417	GM-AEJAA-GM-AEJA|2	631527		GM-AEJGA-GM-AEJ-GM-AEJA|3,GM-AEJG-GM-AEJA-GM-AEJA|3	350259	17.7203	0.00043198	2774.18	2774.19	1.47302	3
1156	11.4248	11.5109	1156	0.998469	12	2	3	11.4763	1012.44	1012.4448	GM-AEJAA|1	111483		GM-AEJA-GM-AEJ-GM-AEJ|3,GM-AEJ-GM-AEJ-GM-AEJA|3	281942	17.448	0.000347724	2646.12	2646.13	2.32618	3
1121	11.2726	11.3917	1121	0.997629	23	2;1	3	11.318	1012.44	1012.4448	GM-AEJAA|1	391947		GM-AEJA-GM-AEJ-GM-AEJ (Anhydro) |3,GM-AEJ-GM-AEJ-GM-AEJA (Anhydro) |3	201138	21.1495	0.000248067	2626.09	2626.1	2.43083	3
1043	10.7356	10.8572	1043	0.994695	15	2;1	2	10.7994	941.404	941.4077	GM-AEJA|1	50301		GM-AEJKR-GM-AEJ-GM-AEJA|3	189163	17.1293	0.000233298	2930.32	2930.32	2.50488	3
1078	10.9042	10.9817	1078	0.985298	8	2	3	10.9492	941.404	941.4077	GM-AEJA|1	41925		GM-AEJGA-GM-AEJA-GM-AEJA|3	181581	18.2276	0.000223947	2845.22	2845.22	2.22666	3
1339	12.7875	12.8387	1339	0.989729	5	2	2	12.8064	941.406	941.4077	GM-AEJA|1	43807		GM-AEJKR-GM-AEJ-GM-AEJA (Anhydro) |3	161516	20.3433	0.0001992	2910.29	2910.3	1.71971	3
1000	10.4231	10.5938	1000	0.979498	29	2;1	3	10.4916	941.405	941.4077	GM-AEJA|1	145204		GM-AEJAA-GM-AEJA-GM-AEJA|3	119064	19.2432	0.000146844	2859.24	2859.24	0.477928	3
1229	11.9514	12.0179	1229	0.994426	7	2	3	11.997	941.406	941.4077	GM-AEJA|1	53317		GM-AEJGA-GM-AEJ-GM-AEJA (Anhydro) |3,GM-AEJG-GM-AEJA-GM-AEJA (Anhydro) |3	104983	21.1944	0.000129477	2754.16	2754.16	1.50011	3
1094	11.0172	11.0519	1094	0.937009	4	2	3	11.0372	941.405	941.4077	GM-AEJA|1	36765		GM-AEJGA-GM-AEJ-GM-AEJ|3,GM-AEJG-GM-AEJ-GM-AEJA|3	85854	17.1796	0.000105885	2703.14	2703.15	2.03452	3
820	9.04919	9.33878	820	0.998115	50	2	3	9.16874	941.406	941.4077	GM-AEJA|1	5791674		GM-AEJGA-GM-AEJA-GM-AEJA (Anhydro) |3	74611	21.7561	9.2019e-05	2825.19	2825.2	1.93436	3
930	9.81944	10.3618	930	0.998375	110	2;1	3	9.97835	941.405	941.4077	GM-AEJA|1	265679120			810821757		1
2582	24.3534	24.3895	2582	0.942549	5	2	3	24.3723	1737.75	1737.7413	GM-AEJG-GM-AEJ (Deacetyl) |2	32053
1994	19.0349	19.2479	1994	0.909212	39	2;3	3	19.1337	1830.76	1830.7627,1830.7628	GM-AEJG-GM-AEJA (Anhydro) |2,GM-AEJGA-GM-AEJ (Anhydro) |2	175800
1586	14.5579	14.7759	1586	0.984057	53	2;3	3	14.6691	1850.78	1850.7889,1850.789	GM-AEJG-GM-AEJA|2,GM-AEJGA-GM-AEJ|2	3612229
1498	13.8353	13.9611	1498	0.970287	21	2;3	3	13.9046	1779.75	1779.7518	GM-AEJG-GM-AEJ|2	466582
2213	21.154	21.2212	2213	0.916815	9	3	5	21.1944	2754.16	2754.1597,2754.1596	GM-AEJGA-GM-AEJ-GM-AEJA (Anhydro) |3,GM-AEJG-GM-AEJA-GM-AEJA (Anhydro) |3	53314
2227	21.2538	21.3593	2227	0.941647	9	3	4	21.3168	2754.15	2754.1597,2754.1596	GM-AEJGA-GM-AEJ-GM-AEJA (Anhydro) |3,GM-AEJG-GM-AEJA-GM-AEJA (Anhydro) |3	51669
1889	17.6566	17.7977	1889	0.931325	19	3	5	17.7203	2774.18	2774.1859,2774.1857999999997	GM-AEJGA-GM-AEJ-GM-AEJA|3,GM-AEJG-GM-AEJA-GM-AEJA|3	350259
1846	17.2314	17.2536	1846	0.958343	3	3	4	17.2434	2703.14	2703.1488,2703.1486999999997	GM-AEJGA-GM-AEJ-GM-AEJ|3,GM-AEJG-GM-AEJ-GM-AEJA|3	36372
1837	17.1572	17.1997	1837	0.927702	4	3	4	17.1796	2703.14	2703.1488,2703.1486999999997	GM-AEJGA-GM-AEJ-GM-AEJ|3,GM-AEJG-GM-AEJ-GM-AEJA|3	49482
2056	19.6653	19.8243	2056	0.962024	35	2;3	3	19.7478	1901.79	1901.7999	GM-AEJGA-GM-AEJA (Anhydro) |2	168161
2275	21.7114	21.816	2275	0.949088	9	3	5	21.7561	2825.19	2825.1968	GM-AEJGA-GM-AEJA-GM-AEJA (Anhydro) |3	74611
1932	18.1864	18.3262	1932	0.929738	14	3	5	18.2276	2845.22	2845.223	GM-AEJGA-GM-AEJA-GM-AEJA|3	181581
1648	15.2715	15.4516	1648	0.967897	39	3;2	4	15.3289	1921.82	1921.8261	GM-AEJGA-GM-AEJA|2	1448902
854	9.30144	9.43601	854	0.997775	23	1;2	3	9.38416	998.426	998.4292	GM-AEJGA|1	1859689
666	7.63882	7.95105	666	0.998467	64	2;1	3	7.78159	927.39	927.3919999999999	GM-AEJG|1	6011750
1186	11.6563	11.6677	1186	0.989833	3	3	4	11.6628	1134.54	1134.54047	GM-AEJKR (Anhydro) |1	64323
1613	14.7622	14.8637	1613	0.999919	9	2	3	14.8174	1134.54	1134.54047	GM-AEJKR (Anhydro) |1	1342412
1954	18.3885	18.5411	1954	0.943003	21	3;2	4	18.4615	1986.9	1986.90027	GM-AEJKR-GM-AEJ (Anhydro) |2	610337
1913	17.988	18.1402	1913	0.997771	29	3;2	5	18.0628	1986.9	1986.90027	GM-AEJKR-GM-AEJ (Anhydro) |2	935399
2120	20.2863	20.4108	2120	0.952408	29	4;3	5	20.3433	2910.29	2910.29717	GM-AEJKR-GM-AEJ-GM-AEJA (Anhydro) |3	100156
2104	20.1349	20.1554	2104	0.919516	3	3	5	20.1452	2910.29	2910.29717	GM-AEJKR-GM-AEJ-GM-AEJA (Anhydro) |3	61360
1827	17.0446	17.2536	1827	0.945962	53	3;4	5	17.1293	2930.32	2930.32337	GM-AEJKR-GM-AEJ-GM-AEJA|3	189163
1991	18.9325	19.1395	1991	0.9763	39	2;3	4	19.0113	2057.93	2057.93737	GM-AEJKR-GM-AEJA (Anhydro) |2	2949212
1967	18.5589	18.7743	1967	0.990833	35	3;2	5	18.648	2057.93	2057.93737	GM-AEJKR-GM-AEJA (Anhydro) |2	3158125
2140	20.5492	20.8023	2140	0.908182	34	4;3	5	20.6867	2981.33	2981.33427	GM-AEJKR-GM-AEJA-GM-AEJA (Anhydro) |3	421842
2181	20.9486	21.0979	2181	0.916974	30	4;3	5	21.0171	2981.33	2981.33427	GM-AEJKR-GM-AEJA-GM-AEJA (Anhydro) |3	488737
1821	17.0218	17.0712	1821	0.936412	6	4	4	17.0417	3001.35	3001.36047	GM-AEJKR-GM-AEJA-GM-AEJA|3	67926
1868	17.4516	17.6393	1868	0.984247	47	3;4	5	17.5376	3001.35	3001.36047	GM-AEJKR-GM-AEJA-GM-AEJA|3	1894288
1553	14.1518	14.2252	1553	0.904184	4	4	4	14.1992	2077.96	2077.96357	GM-AEJKR-GM-AEJA|2	334363
1431	13.4174	13.5316	1431	0.95574	29	4;3	5	13.4734	2077.96	2077.96357	GM-AEJKR-GM-AEJA|2	298089
1606	14.7185	14.9435	1606	0.991724	54	2;3;4	5	14.8319	2077.96	2077.96357	GM-AEJKR-GM-AEJA|2	41806659
1543	14.1117	14.367	1543	0.995842	53	3;2	5	14.2197	2006.92	2006.92647	GM-AEJKR-GM-AEJ|2	7853458
1350	12.8859	12.9694	1350	0.954596	11	3	3	12.9168	2006.92	2006.92647	GM-AEJKR-GM-AEJ|2	47906
581	6.88763	7.08734	581	0.996342	27	3	3	6.99079	1154.56	1154.56667	GM-AEJKR|1	540255
866	9.37805	9.64923	866	0.990484	65	3;2	3	9.49024	1154.56	1154.56667	GM-AEJKR|1	71889696
631	7.34146	7.36055	631	0.988044	5	2	3	7.35111	870.367	870.3706	GM-AEJ|1	64193
540	6.27511	7.31189	540	0.994242	184	1;2	3	6.54955	870.368	870.3706	GM-AEJ|1	117125884
461	5.51735	5.87495	461	0.991917	56	2	3	5.6664	870.368	870.3706	GM-AEJ|1	1616595
867	9.39016	9.67709	867	0.999793	36	1	2	9.51271	698.284	698.2858	GM-AE|1	16342707
806	8.93901	9.06702	806	0.994055	27	1	2	9.00592	698.283	698.2858	GM-AE|1	157803
1869	17.4516	17.5693	1869	0.923313	13	3;2	4	17.5114	2342.97	2342.9845,2342.9845	GM-GM-AEJA-GM-AEJA|2,GM-GM-AEJAA-GM-AEJ|2	245145
1370	13.0085	13.1694	1370	0.997611	28	2	3	13.0794	1419.58	1419.5876	GM-GM-AEJA|1	452417
1252	12.1107	12.1852	1252	0.968403	8	3	3	12.1466	1632.74	1632.74657	GM-GM-AEJKR|1	64818
1112	11.226	11.2961	1112	0.968424	9	2	3	11.2535	1348.55	1348.5505	GM-GM-AEJ|1	225937
252	3.44462	3.89343	252	0.999059	62	1	2	3.60843	498.205	498.2061	GM|0	31452634
130	2.61522	2.7537	130	0.999964	24	1	2	2.67659	498.205	498.2061	GM|0	945682
573	6.83403	6.87676	573	0.999943	6	1	2	6.84966	773.305	773.3067000000001	M (x2)|0	82755
1757	16.5784	16.871	1757	0.940689	42	2	3	16.6969	1661.72	1661.7253,1661.7253	M-AEJA-GM-AEJA|2,M-AEJAA-GM-AEJ|2	133977
1824	16.992	17.1661	1824	0.925889	18	2	3	17.0887	1661.72	1661.7253,1661.7253	M-AEJA-GM-AEJA|2,M-AEJAA-GM-AEJ|2	47226
745	8.37886	8.5498	745	0.990203	44	2;1	3	8.44553	738.325	738.3284	M-AEJA|1	321575
710	8.05125	8.13347	710	0.999456	11	2	3	8.09594	951.485	951.48737	M-AEJKR|1	62909
363	4.47409	4.59687	363	0.980362	35	1;2	2	4.53759	667.289	667.2913	M-AEJ|1	208617
258	3.66455	5.36612	258	0.996717	194	1	2	4.44911	295.126	295.1268	M|0	675808
1	1.66019	1.70296	1	0.999983	6	1	2	1.68868	227.224			118446
2	1.66934	1.69789	2	0.999556	4	1	2	1.67744	248.962			53873
3	1.66019	1.69789	3	0.997269	5	1	2	1.68367	218.167			97879
4	1.66019	1.70296	4	0.997754	10	1	2	1.69076	234.16			335842
5	1.66934	1.71179	5	0.999853	10	1	2	1.70005	390.198			1162571
6	1.66934	1.67379	6	0.998327	3	1	2	1.67178	281.831			139118
7	1.66934	1.69789	7	0.999343	8	1	2	1.68232	327.908			258759
8	1.67379	1.69194	8	0.995629	3	1	2	1.67641	435.335			243023
9	1.66934	1.69789	9	0.99779	6	1	2	1.69	276.172			38412
10	1.66934	1.69789	10	0.999884	3	1	2	1.6812	354.06			19616
11	1.66934	1.69789	11	0.999243	7	1	2	1.68533	282.141			70976
12	1.66934	1.6845	12	0.999364	3	1	2	1.67187	290.858			66789
13	1.66934	1.69194	13	0.995334	3	1	2	1.67625	370.092			27279
14	1.66934	1.67379	14	0.998403	3	1	2	1.67028	274.951			96933
15	1.66934	1.6845	15	0.998694	3	1	2	1.67296	353.923			84652
16	1.67379	1.69789	16	0.999819	3	1	2	1.68685	343.2			39417
17	1.69194	1.70296	17	0.999427	3	1	2	1.69914	608.327			70650
18	1.6845	1.69789	18	0.998789	4	1	2	1.69234	238.14			66296
19	1.6845	1.69789	19	0.999719	3	1	2	1.69416	216.096			74562
20	1.67379	1.69789	20	0.99851	3	1	2	1.68575	283.2			21586
21	1.66019	1.69789	21	0.977349	5	1	2	1.68605	278.149			48072
22	1.66934	1.67379	22	0.987371	4	1	2	1.67057	387.884			40871
23	1.66934	1.69789	23	0.999944	8	1	2	1.68595	298.118			140623
24	1.66019	1.69789	24	0.997049	6	1	2	1.6852	295.135			82973
25	1.66019	1.69194	25	0.999952	3	1	2	1.67692	281.271			10384
26	1.66019	1.66468	26	0.999938	3	1;2	2	1.6644	619.339			32373
27	1.66934	1.69194	27	0.997565	5	1	2	1.67303	304.847			330340
28	1.66934	1.69789	28	0.998598	5	1	2	1.6856	325.999			189942
29	1.66934	1.6845	29	0.997742	3	1	2	1.67394	286.882			519292
30	1.69194	1.70296	30	0.998464	3	1	2	1.7005	320.12			496466
31	1.69194	1.70296	31	0.999472	4	1	2	1.70014	304.074			224748
32	1.69194	1.70296	32	0.99982	3	1	2	1.70105	348.173			194083
33	1.69789	1.72825	33	0.992787	4	1	2	1.72212	429.904			24419480
34	1.70296	1.74471	34	0.994682	3	1	2	1.73549	361.917			29024908
35	1.70296	1.76122	35	0.956692	8	1	2	1.74148	973.802			37681368
36	1.70296	1.77768	36	0.971505	10	1	2	1.74673	701.853			58990376
37	1.70296	1.76945	37	0.986687	9	1	2	1.74446	633.866			42048804
38	1.70296	1.78591	38	0.964977	10	1	2	1.74678	837.827			55968400
39	1.70296	1.76122	39	0.974888	8	1	2	1.74068	905.814			40183124
40	1.71179	1.75295	40	0.959799	6	1	2	1.73815	1041.79			26778970
41	1.70296	1.77768	41	0.962343	10	1	2	1.74771	769.84			59361708
42	1.70296	1.74471	42	0.984115	5	1	2	1.72978	565.879			28437588
43	1.71179	1.75295	43	0.935861	4	1	2	1.73937	1109.78			18468472
44	1.71179	1.74471	44	0.923632	3	1	2	1.73857	1177.76			14331365
45	1.88508	3.51931	45	0.997863	323	1	2	2.7311	234.161			685523
46	1.89373	2.06855	46	0.999379	11	1	2	1.97827	390.276			340335
47	1.90238	3.4963	47	0.999592	236	1	2	2.74652	326			815357
48	1.90238	3.4963	48	0.991146	240	1	2	2.70639	227.224			322001
49	1.89373	3.4963	49	0.996248	246	1	2	2.72354	327.997			718879
50	1.91102	1.93848	50	0.999904	3	1	2	1.92845	228.135			113455
51	1.91102	2.05235	51	0.999547	8	1	2	1.991	298.118			286594
52	1.91979	1.99095	52	0.993331	8	1	2	1.95966	363.916			298094
53	1.99095	2.46376	53	0.999985	60	1	2	2.24853	228.136			153979
54	2.00695	2.22347	54	0.999671	29	1	2	2.09526	209.072			11072221
55	1.99095	2.11621	55	0.999926	9	1	2	2.05751	282.167			199574
56	1.97325	2.05235	56	0.997005	4	1	2	2.01596	329.993			252485
57	2.04351	2.15394	57	0.998805	6	1	2	2.08547	211.067			529810
58	2.04351	2.06855	58	0.999849	3	1	2	2.06132	231.053			573320
59	2.07745	2.13079	59	0.999376	7	1	2	2.10735	335.136			1055554
60	2.11621	3.4963	60	0.999477	227	1	2	2.78066	390.275			321278
61	2.12363	2.17214	61	0.936204	4	1	2	2.14572	295.136			146202
62	2.14803	2.19251	62	0.988661	5	1	2	2.17279	354.061			167818
63	2.15394	3.48568	63	0.999655	240	1	2	2.85832	298.117			365509
64	2.15394	3.48568	64	0.9976	169	1	2	2.81268	329.994			231052
65	2.13079	2.8915	65	0.999361	80	1	2	2.50457	238.14			248835
66	2.15394	2.19844	66	0.996915	4	1	2	2.17957	332.132			202325
67	2.18136	3.50989	67	0.996865	383	1	2	2.86158	282.141			206158
68	2.17214	2.28434	68	0.999993	11	1	2	2.22327	216.11			314708
69	2.17214	2.29889	69	0.984923	8	1	2	2.22143	283.869			57040
70	2.19251	2.29889	70	0.999954	6	1	2	2.23376	284.27			74023
72	2.12363	2.20572	72	0.969952	6	1	2	2.17404	276.171			147927
73	2.17214	3.4963	73	0.999284	221	1	2	2.99493	220.084			182993
74	2.16138	3.4963	74	0.998943	213	1	2	2.85292	370.093			239621
75	2.15394	2.18136	75	0.987309	3	1	2	2.16599	201.91			78496
76	2.14803	2.18708	76	0.999287	3	1	2	2.15987	231.053			379211
77	2.1668	2.33102	77	0.99201	9	1	2	2.25019	380.838			116280
78	2.18136	3.47209	78	0.999988	238	1	2	2.49022	218.09			4512112
79	2.19844	2.48031	79	0.999731	24	1	2	2.34359	271.163			391327
80	2.19844	2.26634	80	0.984974	3	3	2	2.2363	845.748			66788
81	2.29027	2.34311	81	0.999743	5	1	2	2.313	256.239			89963
82	2.31346	2.39204	82	0.995298	9	1	2	2.35927	257.136			153183
83	2.30482	2.39204	83	0.999583	5	1	2	2.35381	212.914			117747
84	2.31918	2.40532	84	0.998287	11	2	2	2.35375	502.247			4314487
85	2.34311	2.37003	85	0.906631	3	1	2	2.35681	740.185			63730
86	2.31346	2.38672	86	0.986595	4	1	2	2.34353	226.229			39998
87	2.31346	3.47209	87	0.999996	160	1	2	2.90978	278.151			177139
88	2.34311	2.39795	88	0.98819	4	3	2	2.36253	845.747			51025
89	2.35383	3.47209	89	0.99815	181	1	2	2.93253	354.062			257890
90	2.36266	2.42208	90	0.945873	8	2	3	2.38833	1352.38			87426
91	2.36266	2.57772	91	0.999996	22	1	2	2.44923	283.891			55727
92	2.38122	2.77804	92	0.999992	40	1	2	2.55914	216.099			102681
93	2.39204	2.7674	93	0.9994	28	1	2	2.55545	284.271			73548
94	2.38122	2.44175	94	0.970346	5	1	2	2.41679	444.111			66992
95	2.38122	2.43729	95	0.991584	7	1	2	2.40564	380.838			85018
96	2.36266	2.42777	96	0.994531	6	1	2	2.39258	380.135			71646
97	2.37003	2.41675	97	0.994827	3	1	2	2.39666	398.338			69927
98	2.39795	2.48561	98	0.999897	7	1	2	2.43804	372.089			38002
99	2.41675	2.48561	99	0.997349	11	1	2	2.45389	259.189			122016
100	2.40532	2.42208	100	0.961968	3	1	2	2.41229	740.185			67984
101	2.42208	2.46376	101	0.999955	4	1	2	2.44083	412.828			40638
102	2.40532	2.44621	102	0.999004	3	1	2	2.42669	295.136			134574
103	2.42777	2.46947	103	0.999559	5	1	2	2.4426	251.124			69167
104	2.41675	2.46376	104	1	3	1	2	2.43862	281.213			33451
105	2.43284	2.45235	105	0.999116	3	1	2	2.44374	226.229			39151
106	2.45235	2.49891	106	0.998708	9	1	2	2.47437	418.18			158160
107	2.46376	2.52034	107	0.997665	10	1	2	2.48902	318.132			152818
108	2.43284	2.63138	108	0.999838	18	1	2	2.52272	202.095			256640
109	2.46376	3.20546	109	0.990892	99	4	2	2.87352	935.775			131755
110	2.46947	2.48561	110	0.999217	3	1	2	2.47774	201.91			52405
112	2.45825	3.12281	112	0.998769	64	1	2	2.80633	740.185			76842
113	2.48031	2.51519	113	0.99973	3	1	2	2.49379	254.26			41526
114	2.48031	2.54976	114	0.997903	6	1	2	2.51828	279.887			38763
115	2.49152	2.53321	115	0.948259	6	1	2	2.51473	228.121			251873
116	2.48031	2.74246	116	0.999985	23	1	2	2.61173	295.136			152561
117	2.49891	2.56632	117	0.999888	5	1	2	2.53347	212.915			115962
118	2.49891	2.55568	118	0.99969	7	1	2	2.52792	380.838			50886
119	2.52034	2.60484	119	0.998078	7	1	2	2.56667	276.172			115160
120	2.49891	2.64324	120	0.992808	10	1	2	2.58312	444.112			64132
121	2.51519	2.58956	121	0.999573	5	1	2	2.55343	251.151			32652
122	2.52034	2.58956	122	0.999693	4	1	2	2.55435	281.213			30368
123	2.54976	2.62607	123	0.999994	8	1	2	2.58498	229.105			121760
124	2.56632	3.50989	124	0.999995	159	1	2	3.02815	228.208			125393
125	2.55568	2.60929	125	0.995996	7	1	2	2.58613	226.229			40774
126	2.57772	2.58956	126	1	3	1	2	2.58471	300.114			42162
127	2.58956	2.67185	127	0.999991	8	1	2	2.62318	213.082			53529
128	2.59523	2.66593	128	0.999802	6	1	2	2.62846	270.255			37700
129	2.60484	2.66002	129	0.907458	7	1	2	2.63325	221.105			24202
131	2.60929	2.76148	131	0.9981	11	1	2	2.66795	380.838			48147
132	2.60929	2.66593	132	0.991547	7	1	2	2.63539	283.891			32140
133	2.58956	2.71258	133	0.905727	16	1	2	2.64795	222.055			37652
134	2.60038	2.65467	134	0.996908	4	1	2	2.62742	326.193			25969
135	2.63138	2.84035	135	0.999848	15	1	2	2.7323	281.213			32883
136	2.63732	2.73713	136	0.997286	10	1	2	2.68674	276.172			112843
137	2.64324	2.69579	137	0.99952	4	1	2	2.66519	495.199			91172
138	2.65467	2.79955	138	0.999052	9	1	2	2.72331	212.915			141937
139	2.66002	2.67963	139	0.99839	3	1	2	2.67171	226.229			30284
140	2.62607	2.70725	140	0.999735	6	1	2	2.6685	256.239			89344
141	2.65467	2.67185	141	0.951173	3	1	2	2.66206	251.151			26879
142	2.62607	2.68514	142	0.997194	4	1	2	2.65786	267.97			32034
143	2.63732	2.7674	143	0.971254	7	4	2	2.70354	799.757			38832
144	2.67963	2.79421	144	0.998584	19	1	2	2.72995	492.217			582459
145	2.67963	2.7674	145	0.999598	16	1	2	2.72343	489.217			274855
146	2.67963	2.73713	146	0.999994	5	1	2	2.70517	279.887			35174
147	2.65467	2.69579	147	0.99999	4	1	2	2.68205	254.26			27164
148	2.70174	2.7537	148	0.999972	6	1	2	2.723	283.891			32185
149	2.7259	2.8915	149	0.999767	11	1	2	2.80763	213.082			59613
150	2.74246	2.84035	150	0.999912	14	1	2	2.7914	519.203			259588
151	2.7537	2.81079	151	0.999918	5	1	2	2.7749	256.239			86196
152	2.7537	2.81824	152	0.99775	8	1	2	2.78423	497.221			121553
153	2.71258	2.79955	153	0.972003	7	3	2	2.76247	761.706			35485
154	2.76148	2.7887	154	0.999309	3	1	2	2.77178	306.142			49739
155	2.74778	2.81824	155	0.999871	4	1	2	2.78595	305.234			42072
156	2.74778	2.79955	156	0.99529	3	1	2	2.76812	326.193			26072
157	2.76148	2.7887	157	0.997934	3	1	2	2.77679	230.925			24647
158	2.77804	2.87021	158	0.99951	14	1	2	2.81953	285.143			326005
159	2.77804	3.44462	159	0.996928	79	1	2	3.13727	398.338			61340
160	2.7887	2.81079	160	0.998261	3	1	2	2.80132	372.089			40381
161	2.7887	2.90274	161	0.999855	20	1	2	2.84179	496.189			474693
162	2.77804	2.80487	162	0.999765	4	1	2	2.79063	279.887			38910
163	2.7674	2.79955	163	0.999766	4	1	2	2.78196	230.09			85595
164	2.76148	2.79955	164	0.999999	3	1	2	2.776	254.224			32169
165	2.79955	2.83444	165	0.997535	5	1	2	2.81359	438.184			98216
166	2.76148	2.89682	166	0.995151	11	1	2	2.84425	222.056			46793
167	2.81824	3.38342	167	0.999886	62	1	2	3.11598	216.11			80773
168	2.84035	2.8915	168	0.99917	5	1	2	2.86653	212.915			118582
169	2.82375	3.44462	169	0.997381	77	1	2	3.11365	276.172			117305
171	2.85405	2.91359	171	0.99999	11	1	2	2.88588	274.127			376349
172	2.85405	2.91359	172	0.99992	7	1	2	2.89137	273.131			83240
173	2.85405	2.88085	173	0.966262	4	1	2	2.86743	300.114			23218
174	2.83444	2.8915	174	0.99912	5	1	2	2.86076	235.93			71953
175	2.87021	3.10544	175	0.999987	20	1	2	2.98154	279.887			33008
176	2.88085	3.14943	176	0.999984	26	1	2	3.03796	281.213			38513
177	2.87554	2.90827	177	0.999856	4	1	2	2.89251	266.136			34912
178	2.84035	2.89682	178	0.972386	3	1	2	2.87059	216.951			18383
179	2.87554	2.98916	179	0.999999	11	1	2	2.94047	253.902			35739
180	2.8915	3.06268	180	0.99892	25	1	2	2.97191	262.897			79506
181	2.90274	2.96173	181	0.999971	5	1	2	2.92333	317.108			103123
182	2.8915	3.17728	182	0.976682	26	1	2	3.0481	444.111			68844
183	2.88085	3.16602	183	0.999997	28	1	2	3.02814	251.151			31678
184	2.91359	3.14943	184	0.999713	31	1	2	3.0267	300.114			36771
185	2.92668	3.00004	185	0.999122	6	1	2	2.96424	212.915			99392
186	2.92668	2.94515	186	0.998685	3	1	2	2.93403	284.27			47298
187	2.93223	3.22699	187	0.999956	39	1	2	3.08954	238.141			187495
188	2.95047	2.96726	188	0.999964	3	1	2	2.95952	266.136			32467
189	2.94515	3.18219	189	0.982372	17	1	2	3.05083	216.952			23059
190	2.94515	3.05202	190	0.999856	19	1	2	2.99161	245.137			479603
191	2.92668	3.32384	191	0.999746	32	1	2	3.11888	213.082			55396
192	2.95047	3.0467	192	0.980832	11	1	2	2.99574	222.056			28116
193	2.96726	2.97792	193	0.998269	3	1	2	2.97272	222.955			20318
194	2.95581	2.97792	194	0.996763	3	1	2	2.96472	226.229			35401
195	2.97259	3.3646	195	0.931854	30	1	2	3.19001	254.26			35780
196	2.98916	3.01865	196	0.999828	3	1	2	3.00698	284.27			39290
197	3.02457	3.06268	197	0.999147	4	1	2	3.04156	235.93			95611
198	3.00004	3.0305	198	0.971596	3	1	2	3.01334	742.186			35962
199	3.0467	3.06714	199	0.998394	3	1	2	3.05753	251.91			40072
200	3.03603	3.09398	200	0.999881	6	1	2	3.06982	372.089			29381
201	3.05202	3.17156	201	0.999986	14	1	2	3.10925	253.902			43864
202	3.05202	3.08292	202	0.996226	3	1	2	3.06832	267.97			27433
203	3.0305	3.12815	203	0.998762	8	1	2	3.08001	242.937			24700
204	3.06268	3.08292	204	0.999232	5	1	2	3.07172	212.915			117192
205	3.07737	3.25988	205	0.999256	16	1	2	3.1637	222.056			32149
206	3.09398	3.11728	206	0.99991	3	1	2	3.10443	256.239			68187
207	3.07737	3.15477	207	0.954701	4	3	2	3.11514	761.706			33569
208	3.08828	3.13881	208	0.967602	4	4	2	3.11629	799.757			27864
209	3.10544	3.13881	209	0.997906	3	1	2	3.12202	356.058			23640
210	3.12281	3.17728	210	0.995898	6	1	2	3.14776	266.875			23542
211	3.13349	3.15477	211	0.999954	3	1	2	3.14231	233.944			136425
212	3.13881	3.18219	212	0.999998	5	1	2	3.15997	235.931			65900
213	3.1601	3.18809	213	0.999412	3	1	2	3.17264	256.239			68993
214	3.1601	3.47209	214	0.93015	33	1	2	3.3089	740.186			68313
215	3.13881	3.20546	215	0.999959	5	1	2	3.16942	372.089			34359
216	3.18809	3.47209	216	0.999193	33	1	2	3.32994	233.944			181725
217	3.19954	3.24827	217	0.998177	4	1	2	3.2234	284.27			41397
218	3.21634	3.22699	218	0.993095	3	1	2	3.22109	216.951			22789
219	3.19361	3.42069	219	0.997761	29	1	2	3.30464	262.897			87700
220	3.211	3.4393	220	0.999369	28	1	2	3.32175	253.902			59318
221	3.211	3.26951	221	0.975638	5	4	2	3.24464	799.757			31598
222	3.22699	3.29172	222	0.996738	6	1	2	3.25223	300.114			28859
223	3.18219	3.26951	223	0.999993	5	1	2	3.23272	270.255			32313
224	3.18809	3.211	224	0.993363	3	1	2	3.19876	279.887			25724
225	3.18809	3.42069	225	0.997853	22	1	2	3.31902	281.213			30066
226	3.23228	3.4393	226	0.99695	26	1	2	3.331	444.111			61961
227	3.24294	3.39941	227	0.994698	27	2	2	3.31406	886.363			117760
228	3.25419	3.29172	228	0.991919	5	4	2	3.27382	935.775			141614
229	3.26505	3.30257	229	0.999158	4	1	2	3.28541	212.915			123485
230	3.25988	3.45718	230	0.998724	22	1	2	3.36756	238.141			193518
231	3.25419	3.30257	231	0.999964	5	1	2	3.27506	235.93			92289
232	3.26951	3.31852	232	0.973452	6	1	2	3.29698	216.952			24542
233	3.29724	3.33447	233	0.994302	5	2	2	3.31936	924.31			59504
234	3.29724	3.3646	234	0.992691	8	1	2	3.33544	222.056			39561
235	3.29724	3.35123	235	0.998885	4	1	2	3.3232	256.239			72637
236	3.31852	3.35123	236	0.965156	3	1	2	3.33153	266.875			27943
237	3.32917	3.36014	237	0.933081	3	4	2	3.34432	799.757			30666
238	3.34608	3.37051	238	0.98576	5	4	3	3.35702	935.775			148262
239	3.35123	3.39408	239	0.999886	5	1	2	3.37495	372.089			33180
240	3.3646	3.4393	240	0.999978	10	1	2	3.39584	268.153			76552
241	3.38342	3.4393	241	0.999999	4	1	2	3.40276	251.911			36343
242	3.39941	3.42069	242	0.994905	4	1	2	3.41043	256.239			76708
243	3.39941	3.42846	243	0.906596	3	6	3	3.41219	1775.4			20625
244	3.38342	3.42069	244	0.999299	3	1	2	3.40282	284.27			42887
245	3.40473	3.42846	245	0.997811	3	1	2	3.41485	266.875			23066
246	3.42069	3.4393	246	0.99983	3	1	2	3.42868	254.26			25027
247	3.42846	3.47209	247	0.999596	5	1	2	3.44922	212.915			140806
248	3.41536	3.48568	248	0.999276	6	1	2	3.44713	216.099			64851
249	3.42069	3.4963	249	0.99152	4	4	2	3.45412	935.774			179816
250	3.43398	3.94121	250	0.99999	71	1	2	3.60861	520.187			38749836
251	3.41003	3.45718	251	0.999766	3	1	2	3.43889	251.151			35125
253	3.44462	3.48568	253	0.999086	4	1	2	3.46618	477.206			148826
254	3.46464	3.79806	254	0.997194	48	2;1	2	3.60201	536.151			2776142
255	3.48568	3.67603	255	0.997856	9	1	2	3.59871	551.117			718445
256	3.56726	3.63275	256	0.977088	7	2	3	3.59307	1034.36			1006313
257	3.65718	6.40801	257	0.99985	766	1	2	4.99604	234.161			655736
259	3.68195	6.39068	259	0.999443	457	1	2	5.05456	228.208			120941
260	3.70103	6.37294	260	0.996667	440	1	2	5.00966	327.997			578817
261	3.70103	3.74309	261	0.99124	6	4	2	3.72277	935.775			204123
262	3.69383	6.37294	262	0.99962	362	1	2	5.08803	233.943			278701
263	3.66455	6.39068	263	0.992219	379	1	2	4.98062	227.224			199296
264	3.70103	6.36702	264	0.999993	439	1	2	4.99446	390.275			230828
265	3.71164	6.36702	265	0.999284	434	1	2	5.0118	326			587535
266	3.72275	6.33074	266	0.999554	413	1	2	5.01051	354.062			190327
267	3.74309	6.35804	267	0.999006	499	1	2	5.03026	298.118			375802
268	3.72275	6.36702	268	0.997469	812	1	2	5.04301	282.167			184014
269	3.72275	6.35804	269	0.99861	434	1	2	5.02967	370.093			229565
270	3.7302	4.26516	270	0.998169	61	1	2	4.00783	329.994			198065
271	3.7302	5.43362	271	1	284	1	2	4.5508	220.084			211429
272	3.75787	3.94121	272	0.999861	25	1	2	3.82739	236.079			345829
273	3.73591	3.80355	273	0.999179	4	1	2	3.76427	506.207			234739
274	3.7635	5.43362	274	0.998361	271	1	2	4.59629	218.166			185505
275	3.76865	3.80926	275	0.991166	3	1	2	3.78657	276.171			94798
276	3.79806	3.85972	276	0.999104	6	1	2	3.82523	216.099			75799
277	3.80926	3.84129	277	0.997923	3	1	2	3.82447	238.141			175901
278	3.80926	3.97414	278	0.991975	28	2	3	3.88636	892.362			341329
279	3.79806	3.84907	279	0.995686	4	1	2	3.82106	226.229			38072
280	3.80926	4.17108	280	0.998899	56	1	2	3.93278	496.189			775309
281	3.80926	4.71066	281	0.994765	88	1	2	4.24199	740.185			76375
283	3.78744	5.05703	283	0.999338	167	1	2	4.48492	253.902			83251
284	3.83382	4.4796	284	0.999648	95	1	2	3.97572	518.171			363959
285	3.84129	3.85972	285	0.999896	3	1	2	3.84963	278.151			153446
286	3.84907	3.86565	286	0.998772	3	1	2	3.85885	276.172			80627
287	3.83382	3.91554	287	0.999414	12	1	2	3.88297	731.293			126385
288	3.83382	3.94121	288	0.999645	7	1	2	3.89144	212.915			157583
289	3.88217	3.90472	289	0.995777	3	1	2	3.89592	281.213			31405
290	3.89343	4.51743	290	0.999725	74	1	2	4.19437	238.141			197310
291	3.89343	4.63513	291	0.999439	85	1	2	4.23112	278.151			156774
292	3.89343	4.18825	292	0.99977	23	1	2	4.04305	213.082			45455
293	3.91022	4.18825	293	0.987284	26	1	2	4.05905	444.111			61271
294	3.92146	3.95204	294	0.998922	4	1	2	3.93526	226.229			36069
295	3.91554	3.94672	295	1	5	1	2	3.92984	254.26			34909
296	3.87684	3.95204	296	0.998365	5	1	2	3.91115	372.089			39940
297	3.92146	4.37566	297	0.999173	43	1	2	4.14831	276.172			119702
298	3.95796	4.02596	298	0.998704	6	1	2	3.98389	230.925			34995
299	3.97946	4.01524	299	0.999112	4	1	2	4.00196	212.915			142684
300	3.98476	4.1768	300	0.999793	17	1	2	4.07776	281.213			35841
301	3.95796	4.0808	301	0.997375	9	1	2	4.01638	280.908			27923
302	3.94672	4.19418	302	0.998774	17	1	2	4.06966	256.239			92483
303	3.96884	3.99067	303	0.99999	5	1	2	3.98002	235.931			45360
304	3.97414	3.98476	304	0.997795	3	1	2	3.97932	262.897			92608
305	3.97946	4.13298	305	0.999377	13	1	2	4.04773	216.099			54450
306	3.99067	4.09943	306	0.998193	10	1	2	4.03756	372.089			41605
307	3.99067	4.02596	307	0.999885	6	1	2	4.00725	222.056			44418
308	3.9962	4.02596	308	0.929826	3	1	2	4.01424	221.105			18263
309	4.00747	4.05338	309	0.972986	3	1	2	4.03077	398.339			40859
310	4.01524	4.26516	310	0.901587	23	1	2	4.15314	251.151			30637
311	4.04253	4.06936	311	0.999162	4	1	2	4.05648	284.271			58406
312	4.0366	4.06406	312	0.999499	3	1	2	4.05375	262.897			101296
313	4.0366	4.06936	313	0.998966	5	1	2	4.05377	270.255			36585
314	4.00154	4.04805	314	0.996108	4	1	2	4.02945	267.97			28030
315	4.04253	4.0939	315	0.999848	6	1	2	4.06876	254.26			29209
316	4.06406	4.26027	316	0.996401	13	1	2	4.1655	222.056			36352
317	4.05338	4.24922	317	0.999887	17	1	2	4.14236	212.915			165798
318	4.04805	4.08612	318	0.977146	4	4	2	4.0712	799.757			30939
319	4.11623	4.14366	319	0.953623	3	1	2	4.13253	428.08			39112
320	4.14366	4.19418	320	0.999967	9	1	2	4.16934	254.26			30145
321	4.11623	4.22715	321	0.999857	7	1	2	4.16257	262.897			105797
322	4.12154	4.14902	322	0.986861	3	4	3	4.13073	799.757			35468
323	4.11623	4.14902	323	0.998257	3	1	2	4.13454	284.27			58813
324	4.12154	4.15432	324	0.996731	3	1	2	4.14182	398.338			54948
325	4.13298	4.22181	325	0.999205	5	1	2	4.17676	372.089			37282
326	4.16023	4.18825	326	0.999988	6	1	2	4.17502	216.1			50641
327	4.16023	4.33755	327	0.975274	24	2	2	4.24146	653.263			134575
328	4.15432	4.21649	328	0.998276	5	1	2	4.19008	226.229			36681
329	4.16023	4.18825	329	0.999883	3	1	2	4.17612	326.193			26307
330	4.1768	4.22181	330	0.999977	4	1	2	4.1986	251.91			30202
331	4.19418	4.2437	331	0.986847	5	1	2	4.21767	284.27			58451
332	4.21649	4.36421	332	0.99988	10	1	2	4.27388	496.189			81705
333	4.22181	4.23779	333	1	4	1	2	4.22973	281.214			28768
334	4.20504	4.2437	334	0.969298	3	2	2	4.23337	904.319			78397
335	4.23244	4.34326	335	0.981537	11	1	2	4.28594	444.112			56877
336	4.23244	4.26027	336	0.999749	3	1	2	4.24628	213.082			42564
337	4.23779	4.37014	337	0.997338	16	1	2	4.30086	252.074			100596
338	4.24922	4.29932	338	0.999966	5	1	2	4.27496	254.26			32454
339	4.25453	4.27109	339	0.999769	3	1	2	4.2615	226.229			37206
340	4.26027	4.30484	340	0.999923	5	1	2	4.27963	216.1			48562
341	4.25453	4.64698	341	0.997839	28	1	2	4.43347	372.089			40856
342	4.22715	4.27661	342	0.980911	3	1	2	4.25443	221.105			20414
343	4.22715	4.3155	343	0.999923	6	1	2	4.27558	280.907			32218
344	4.26027	4.30484	344	0.972223	5	4	2	4.28262	799.757			29795
345	4.29932	5.50385	345	0.997136	139	1	2	4.87254	329.994			188220
346	4.31019	4.33203	346	0.999142	4	1	2	4.32155	212.915			137908
347	4.29932	4.40307	347	0.999705	7	1	2	4.35033	226.229			39915
348	4.32081	4.37014	348	0.999873	5	1	2	4.34364	291.142			197819
349	4.33755	4.37014	349	0.99957	5	1	2	4.35335	216.099			55499
350	4.33755	4.46286	350	0.999801	14	1	2	4.38964	213.082			38766
351	4.33755	4.50089	351	0.998554	12	1	2	4.41362	251.151			28044
352	4.36421	4.37566	352	0.999496	3	1	2	4.37009	212.915			155159
353	4.35278	4.44485	353	0.999388	7	1	2	4.40343	280.907			43480
354	4.36421	4.3869	354	0.999915	3	1	2	4.37464	254.26			27026
355	4.37566	4.5066	355	0.97472	11	1	2	4.42728	444.112			60773
356	4.37014	4.44485	356	0.998617	5	1	2	4.40753	222.056			35584
357	4.37014	4.40307	357	0.993404	3	1	2	4.38429	281.213			23927
358	4.39774	4.58175	358	0.999133	27	1	2	4.47956	236.079			293434
359	4.40898	4.48493	359	0.999976	8	1	2	4.44257	216.099			69664
360	4.39774	4.46286	360	0.99921	5	1	2	4.42477	496.189			89089
361	4.41449	4.5066	361	0.998791	5	1	2	4.46139	256.239			104274
362	4.43893	4.61304	362	0.999733	13	1	2	4.52664	281.214			37772
364	4.47409	4.75462	364	0.999887	23	1	2	4.60632	212.915			170231
365	4.50089	4.93241	365	0.998929	38	1	2	4.72392	280.908			44414
366	4.5066	4.61896	366	0.999051	14	1	2	4.54301	222.1			82448
367	4.48493	4.52635	367	0.99925	3	1	2	4.50732	251.91			28235
368	4.50089	4.55435	368	0.999429	3	1	2	4.52295	254.26			30384
369	4.53227	4.55435	369	0.99929	3	1	2	4.54472	251.151			24253
370	4.55435	4.66848	370	0.999089	12	1	2	4.59651	568.258			116676
371	4.56579	4.92751	371	0.999989	68	1	2	4.71501	238.141			192136
372	4.56028	4.80502	372	0.99962	21	1	2	4.6847	256.239			102355
373	4.55435	4.93241	373	0.991868	33	1	2	4.73004	444.112			67239
374	4.57111	4.70512	374	0.997231	11	1	2	4.63514	518.172			41370
375	4.6024	4.62449	375	0.950007	3	7	3	4.61052	1651.55			28377
376	4.58765	4.63513	376	0.999998	3	1	2	4.60992	251.151			32753
377	4.57643	4.62982	377	0.999983	3	1	2	4.60365	496.189			81431
378	4.65249	4.71066	378	0.999794	7	1	2	4.68206	216.1			50672
379	4.65249	4.73314	379	0.997787	8	1	2	4.68073	226.229			36973
380	4.66317	4.70512	380	0.997708	5	1	2	4.68122	281.213			24833
381	4.66848	4.73865	381	0.997726	6	1	2	4.69977	262.897			115212
382	4.66848	5.04495	382	0.999382	32	1	2	4.83494	278.151			145844
384	4.66848	4.73314	384	0.999855	5	1	2	4.70315	496.189			93782
385	4.68157	4.73865	385	0.999783	7	1	2	4.71312	372.089			38987
386	4.68157	4.76618	386	0.999963	9	1	2	4.72859	251.151			30509
387	4.67381	4.71066	387	0.99676	3	1	2	4.69252	276.172			91269
388	4.71066	4.73865	388	0.998937	4	1	2	4.72853	254.26			29185
389	4.71598	4.744	389	0.987651	3	1	2	4.72967	284.271			66326
390	4.744	4.98374	390	0.995568	29	1	2	4.85761	740.186			70597
391	4.74931	4.88842	391	0.998713	12	1	2	4.81737	839.374			67912
392	4.77169	4.79418	392	0.999852	3	1	2	4.78554	235.931			56434
393	4.75462	4.79418	393	0.999928	5	1	2	4.77672	216.099			65672
394	4.744	4.83854	394	0.993674	9	1	2	4.78545	518.171			40142
395	4.72722	4.93241	395	0.996851	25	2	3	4.82535	1042.45			172419
396	4.77701	4.85016	396	0.999809	7	1	2	4.81811	496.19			89150
397	4.7603	4.81646	397	0.999777	5	1	2	4.79433	281.214			39460
398	4.79418	4.81095	398	0.997202	3	1	2	4.80372	276.172			89057
399	4.80502	5.01126	399	0.998823	14	1	2	4.89439	251.151			36803
400	4.7997	4.82789	400	0.999196	5	1	2	4.81392	212.915			139778
401	4.82789	4.94527	401	0.999903	10	1	2	4.88701	216.1			60749
402	4.84426	4.87225	402	0.996406	3	1	2	4.85463	256.239			83630
403	4.84426	4.9163	403	0.99862	9	1	2	4.8716	252.074			68156
404	4.83854	4.87225	404	0.968185	3	1	2	4.85161	254.26			28421
405	4.84426	4.95653	405	0.999902	10	1	2	4.91435	372.089			40500
406	4.87225	5.10748	406	0.997855	19	1	2	4.98725	518.172			45280
407	4.89434	4.98923	407	0.998365	7	1	2	4.94268	281.214			30237
408	4.9163	5.17764	408	0.991045	33	2	3	5.01702	998.463			341844
409	4.88842	5.01126	409	0.998904	6	1	2	4.95502	496.189			101936
410	4.9163	5.138	410	0.999975	25	1;2	2	5.01252	795.385			134263
411	4.93977	5.19144	411	0.991585	37	2	3	5.06747	869.385			288162
412	4.95653	4.99494	412	0.99998	3	1	2	4.97014	222.056			43111
413	4.96717	5.13219	413	0.999219	14	1	2	5.04701	238.141			211029
414	4.90566	5.02228	414	0.999393	7	1	2	4.96887	256.239			98754
415	4.95653	4.98374	415	0.99214	4	1	2	4.97147	226.229			38056
416	4.93977	5.02228	416	0.999629	6	1	2	4.98279	326.193			32015
417	4.95061	4.98923	417	0.99998	3	1	2	4.96524	254.26			29795
418	4.96717	5.14353	418	0.998607	24	1	2	5.06173	666.305			157485
419	4.98374	5.14886	419	0.995765	15	2;3	3	5.09016	907.33			962311
420	4.97782	5.04495	420	0.999138	4	1	2	5.00786	212.915			164908
421	5.00558	5.01638	421	1	3	1	2	5.01045	372.09			43792
422	5.01126	5.03903	422	0.999134	3	1	2	5.02918	666.167			26627
423	5.02228	5.16641	423	0.999094	13	1	2	5.10057	280.907			46952
424	5.02228	5.35851	424	0.982879	33	1	2	5.19803	740.186			73094
425	5.02228	5.35405	425	0.999999	25	1	2	5.19233	216.099			63858
426	5.02819	5.15477	426	0.999486	11	1	2	5.0937	281.214			38007
427	5.06766	5.138	427	0.998868	7	1	2	5.10313	256.239			98676
428	5.04495	5.70455	428	0.999851	74	1	2	5.47814	496.189			2564457
429	5.07939	5.0965	429	0.998752	3	1	2	5.08715	222.056			39812
430	5.09081	5.26516	430	0.999392	12	1	2	5.17579	212.915			161591
431	5.0965	5.45145	431	0.999484	46	1	2	5.25633	253.902			82421
432	5.0965	5.11831	432	0.955404	3	1	2	5.10726	444.112			48433
433	5.10748	5.26516	433	0.998968	10	1	2	5.17653	226.229			38617
434	5.11831	5.15477	434	0.999989	5	1	2	5.14006	326.193			32819
435	5.13219	5.38285	435	0.999822	26	1	2	5.25444	278.151			146105
436	5.14353	5.21945	436	0.999135	8	1	2	5.17832	372.089			34567
437	5.15477	5.30395	437	0.917486	14	1	2	5.22374	254.26			35087
438	5.16641	5.36612	438	0.999999	18	1	2	5.27669	238.141			202544
439	5.16069	5.3917	439	0.991661	20	1	2	5.27026	444.112			63249
440	5.17764	5.34959	440	0.99794	13	1	2	5.27222	276.172			94092
441	5.19144	5.21945	441	0.999227	3	1	2	5.20752	235.931			62908
442	5.2082	5.41301	442	0.999697	21	1	2	5.3066	280.908			48402
443	5.19144	5.24688	443	0.997531	5	1	2	5.21841	281.213			26048
444	5.19735	5.2303	444	0.995183	4	1	2	5.21111	518.172			32519
445	5.18699	5.27574	445	0.999035	5	1	2	5.22929	256.239			100041
446	5.21945	5.24095	446	0.974263	3	1	2	5.23087	251.151			26221
447	5.29802	5.35405	447	0.999891	5	1	2	5.32426	212.915			166219
448	5.30947	5.33875	448	0.998557	3	1	2	5.32741	256.239			99083
449	5.28717	5.72785	449	0.99997	63	1	2	5.48653	518.171			1182531
450	5.28126	5.38285	450	0.998595	8	1	2	5.32887	281.213			34031
451	5.28126	5.31481	451	0.999733	3	1	2	5.30049	356.058			33819
452	5.28717	5.38285	452	0.998449	9	1	2	5.33635	372.089			44900
453	5.31481	5.43362	453	0.996301	10	1	2	5.37081	226.229			42675
454	5.33875	5.37202	454	0.999897	5	1	2	5.35545	254.26			27881
456	5.38285	5.53933	456	0.999993	9	1	2	5.463	276.172			112001
457	5.41301	5.51164	457	0.999249	7	1	2	5.46637	275.1			104502
458	5.41893	5.45735	458	0.997889	7	2;1	2	5.44178	534.136			87759
459	5.47861	6.32541	459	0.999933	125	1	2	5.93629	218.166			170420
460	5.51164	5.53933	460	0.974599	4	2;1	2	5.52255	534.136			61354
462	5.52281	5.62302	462	0.997986	8	1	2	5.56667	740.187			69496
463	5.52814	6.33961	463	0.999299	112	1	2	5.96815	253.902			93841
464	5.54672	6.24654	464	0.997209	77	1	2	5.90569	329.994			181240
465	5.51735	6.32541	465	0.996442	112	1	2	5.95121	220.146			124015
466	5.54672	5.61708	466	0.999328	7	1	2	5.58344	238.141			179324
468	5.51735	5.59481	468	0.999169	6	1	2	5.55916	212.915			164239
469	5.58173	5.71539	469	0.985218	13	2;3	3	5.65729	908.315			111857
470	5.60073	5.79775	470	0.998275	10	1	2	5.68484	372.089			47433
471	5.58173	5.8143	471	0.998712	18	1	2	5.70309	278.151			137829
472	5.60645	5.75053	472	0.952593	12	2	3	5.68044	1007.43			118358
473	5.62302	6.09847	473	0.996602	45	1	2	5.88669	295.136			153587
474	5.65149	5.6629	474	0.999089	3	1	2	5.65724	212.915			166709
475	5.6629	5.69393	475	0.993903	4	1	2	5.67886	256.239			87577
476	5.6408	5.80307	476	0.999621	12	1	2	5.73379	216.099			53762
477	5.68208	5.7446	477	0.976555	5	1	2	5.70751	444.112			55453
478	5.69393	5.89646	478	0.999873	21	1	2	5.78218	276.172			122804
479	5.70455	5.90178	479	0.999285	17	1	2	5.79639	280.907			47413
480	5.72067	5.80838	480	0.999776	7	1	2	5.76599	254.26			30983
481	5.72067	5.85024	481	0.999525	8	1	2	5.79533	281.213			45166
482	5.66883	6.09254	482	0.990858	33	1	2	5.89771	740.185			73565
483	5.72785	6.11526	483	0.989536	58	2	3	5.89156	984.411			544988
484	5.7446	5.86902	484	0.999645	19	1	2	5.80351	238.141			188737
485	5.75053	5.83104	485	0.99266	6	1	2	5.79316	226.229			35878
486	5.76179	6.05324	486	0.997462	36	1	2	5.89123	781.332			258475
487	5.76684	5.97868	487	0.999873	16	1	2	5.87992	256.239			89102
488	5.80307	5.91853	488	0.962983	13	2	3	5.86754	1006.39			80555
489	5.82021	5.84474	489	0.975357	3	1	2	5.83243	251.151			27771
490	5.80838	6.01964	490	0.981801	23	2	3	5.8967	1022.36			171857
491	5.82573	5.84474	491	0.977104	3	1	2	5.83602	444.111			66447
492	5.84474	6.1208	492	0.998861	22	1	2	5.97716	372.089			45361
493	5.86166	6.33961	493	0.999351	45	1	2	6.10871	278.151			132735
494	5.88562	5.92638	494	0.998956	4	1	2	5.90212	252.11			106835
495	5.86902	5.89113	495	0.999146	3	1	2	5.87703	212.915			178520
496	5.86902	5.94866	496	0.994067	5	1	2	5.90325	226.229			32135
497	5.90769	5.95453	497	0.999661	4	1	2	5.93384	216.099			60792
498	5.90178	6.21802	498	0.998856	23	1	2	6.08085	254.26			33523
499	5.93722	6.33961	499	1	47	1	2	6.13405	238.141			208615
500	5.94314	5.96741	500	0.987295	4	1	2	5.95588	444.112			65370
501	5.94314	6.32541	501	0.998939	35	1	2	6.13767	280.908			51670
502	5.91319	5.95453	502	0.997874	3	1	2	5.93341	281.213			29090
503	5.98955	6.07537	503	0.999962	10	1	2	6.03808	281.214			29849
504	6.00099	6.19766	504	0.999563	15	1	2	6.10949	251.151			25327
505	5.97868	6.01964	505	0.918272	3	1	2	5.99997	221.104			19339
506	5.97868	6.05324	506	0.999875	6	1	2	6.01655	212.915			152890
507	5.98421	6.14291	507	0.999999	9	1	2	6.05586	226.229			39403
508	5.98421	6.08127	508	0.999512	6	1	2	6.03591	276.172			86137
509	6.00633	6.31991	509	0.995948	25	1	2	6.15116	444.111			61206
510	6.01411	6.07002	510	0.997957	5	1	2	6.04082	262.897			109583
511	6.01411	6.11526	511	0.999334	10	1	2	6.06677	216.099			56693
512	6.01411	6.18702	512	0.994891	20	1	2	6.08996	398.338			53809
513	6.04237	6.1208	513	0.999955	6	1	2	6.07483	235.93			62349
514	6.04237	6.12673	514	0.998222	9	1	2	6.09108	256.239			88118
515	6.04237	6.1376	515	0.969264	12	2	2	6.08337	795.384			37547
516	6.05857	6.1208	516	0.999894	6	1	2	6.09316	326.193			32039
517	6.06448	6.30927	517	0.999795	19	1	2	6.18571	222.1			52091
518	6.0479	6.12673	518	0.999913	4	1	2	6.08448	284.271			69070
519	6.08681	6.22355	519	0.999951	11	1	2	6.14202	212.915			174522
520	6.10934	6.1811	520	0.999662	7	1	2	6.14535	262.897			138454
521	6.13226	6.19766	521	0.982542	6	1	2	6.16047	740.186			74877
522	6.1208	6.28599	522	0.999861	14	1	2	6.20007	281.214			35742
523	6.11526	6.1754	523	0.99939	7	1	2	6.14852	276.172			89058
524	6.08681	6.11526	524	0.999879	3	1	2	6.09818	213.082			28810
525	6.1208	6.13226	525	0.999463	3	1	2	6.12571	369.874			29774
526	6.1376	6.35804	526	0.996467	23	1	2	6.23558	295.136			172220
527	6.1376	6.16479	527	0.996111	3	1	2	6.14915	356.058			34436
528	6.15356	6.1754	528	0.949403	3	1	2	6.16154	742.186			33073
529	6.15888	6.2051	529	0.999947	6	1	2	6.18333	216.099			52380
530	6.16479	6.19766	530	0.998631	3	1	2	6.18158	256.239			81654
531	6.1811	6.21064	531	0.999777	3	1	2	6.19654	226.229			35633
532	6.15888	6.24208	532	0.999563	5	1	2	6.20746	284.27			63382
533	6.23317	6.26918	533	0.942512	6	1	2	6.25253	740.186			60168
534	6.23762	6.29191	534	0.999999	7	1	2	6.25714	216.1			44106
535	6.23317	6.26328	535	0.999704	4	1	2	6.24603	372.089			27177
536	6.24654	6.29191	536	0.999731	5	1	2	6.27203	226.229			37075
537	6.24654	6.27511	537	0.992158	3	1	2	6.26031	221.104			24898
538	6.23762	6.27511	538	0.981641	3	1	2	6.25316	251.151			22924
539	6.24208	6.29191	539	0.998526	5	1	2	6.27051	256.239			95185
542	6.29744	6.33961	542	0.999596	4	1	2	6.3248	372.089			38372
543	6.29191	7.12133	543	0.996131	103	2;1	3	6.55674	908.315			16983008
544	6.28064	6.33961	544	0.998169	7	1	2	6.31183	329.994			142894
545	6.30336	6.33961	545	0.99912	3	1	2	6.31719	212.915			145371
546	6.33074	6.40801	546	0.98684	7	2	3	6.38623	930.297			454073
547	6.33961	6.85309	547	0.98778	100	2;1	2	6.5474	892.35			9997479
548	6.34739	6.41695	548	0.982283	8	2	3	6.39199	946.26			593128
549	6.43413	6.46861	549	0.999688	3	1	2	6.45396	689.272			1209950
550	6.46861	6.49446	550	0.964473	3	2	3	6.48252	1778.68			1081675
551	6.60654	6.64959	551	0.973819	3	1	2	6.62844	689.272			1206428
552	6.63221	6.83403	552	0.986969	14	2	3	6.70617	946.261			750130
553	6.64114	6.72933	553	0.987326	5	2	2	6.67767	914.331			575204
554	6.67577	8.29077	554	0.999932	420	1	2	7.46001	234.161			579942
555	6.7234	6.84716	555	0.986309	10	2	2	6.78013	957.399			273284
557	6.74685	6.82263	557	0.989745	5	2	2	6.77742	930.297			196063
558	6.75574	7.7267	558	0.998879	166	1	2	7.28137	390.276			186708
559	6.7234	8.20117	559	0.999901	234	1	2	7.49737	227.224			193542
560	6.75574	8.18335	560	0.999547	195	1	2	7.39243	233.944			226960
561	6.75574	8.20117	561	0.99899	437	1	2	7.48263	282.167			191530
562	6.76498	7.74597	562	0.998254	170	1	2	7.26875	325.999			520325
563	6.77364	7.74597	563	0.998867	172	1	2	7.27752	327.997			501256
564	6.77906	7.73414	564	0.999556	173	1	2	7.27297	298.118			343359
565	6.77906	8.1923	565	0.998872	232	1	2	7.45112	370.093			203524
566	6.76498	6.90954	566	0.99199	23	1	2	6.83347	639.247			249341
567	6.76498	7.7267	567	0.999608	201	1	2	7.24661	228.208			110752
568	6.77906	7.71776	568	0.999195	150	1	2	7.25762	354.061			195030
570	6.80252	7.71245	570	0.999715	106	1	2	7.3017	329.994			163375
571	6.79661	7.71245	571	0.9981	148	1	2	7.29559	218.166			160452
572	6.82263	6.95869	572	0.999908	14	1	2	6.89091	220.146			98518
574	6.82263	6.98742	574	0.999483	18	1	2	6.89052	253.902			71217
575	6.8097	6.85901	575	0.999868	3	2	3	6.82887	972.32			61432
576	6.8097	6.85901	576	0.978279	4	1	2	6.83715	740.186			64215
577	6.84716	7.18641	577	0.999602	53	2	3	7.01573	1113.49			1091909
578	6.82263	6.89827	578	0.999508	6	1	2	6.87014	212.915			109256
582	6.89295	7.13316	582	1	51	1;2	2	7.00947	910.411			348878
583	6.89295	6.90954	583	0.999637	3	1	2	6.90292	254.224			28458
584	6.89295	7.0814	584	0.998059	29	1	2	6.99456	605.264			426552
585	6.88763	6.92613	585	0.999903	3	1	2	6.90439	216.099			34367
586	6.84716	6.91547	586	0.998105	6	1	2	6.88923	226.229			35050
587	6.89295	6.9318	587	0.998976	3	1	2	6.91258	256.239			74251
588	6.91547	7.11043	588	0.980777	36	2;3	3	7.01598	1151.44			167732
589	6.89827	7.365	589	0.991412	47	1	2	7.15456	740.186			81885
590	6.96461	7.06543	590	0.94521	9	2	3	7.01232	1135.47			111072
591	6.98742	7.26871	591	0.999251	28	1	2	7.14701	212.915			115347
592	7.01356	7.11043	592	0.999667	9	1	2	7.05109	697.3			111859
593	7.02496	7.63882	593	0.998357	96	1	2	7.32829	253.902			70905
594	7.03684	7.06008	594	0.999863	4	1	2	7.04829	256.239			67983
595	7.01356	7.71245	595	0.999104	114	1	2	7.3688	220.146			122671
596	7.06543	7.69589	596	0.999281	107	1	2	7.39121	276.172			91037
597	7.07607	7.23543	597	0.999969	16	1	2	7.1577	281.213			35340
598	7.06543	7.16597	598	0.998429	7	1	2	7.1238	256.959			77696
599	7.08734	7.15531	599	0.998426	10	1	2	7.12171	216.099			49927
600	7.10451	7.24964	600	0.999917	14	1	2	7.16925	326.193			33830
601	7.11043	7.18195	601	0.982178	5	1	2	7.14463	226.229			24802
602	7.08734	7.26871	602	0.999451	19	1	2	7.1838	238.141			198073
603	7.08734	7.19087	603	0.999982	10	1	2	7.14318	278.151			125803
604	7.12133	7.18641	604	0.999511	7	1	2	7.15484	372.089			30409
605	7.12133	7.19087	605	0.999901	6	1	2	7.15323	280.907			29352
606	7.12724	7.27762	606	0.996779	13	1	2	7.19433	216.952			29408
607	7.14998	7.17706	607	0.999418	3	1	2	7.16241	369.874			26107
608	7.15531	7.18195	608	0.999976	5	1	2	7.16934	295.136			106216
609	7.16065	7.24073	609	0.982505	8	2	3	7.21238	1038.51			94599
610	7.16065	7.19533	610	0.996806	3	1	2	7.17619	221.104			19777
611	7.16065	7.26425	611	0.989641	17	2;3	3	7.21716	1241.58			98409
612	7.18641	7.48023	612	0.999932	38	1	2	7.34667	216.099			56670
613	7.20679	7.23009	613	0.998253	3	1	2	7.221	256.96			71747
614	7.17131	7.24073	614	0.977845	5	1	2	7.20923	444.111			51167
615	7.19087	7.23543	615	0.99937	4	1	2	7.20964	254.26			28350
616	7.2127	7.28822	616	0.996796	7	1	2	7.25565	226.229			31448
617	7.22454	7.33255	617	0.999185	14	1	2	7.26271	533.232			122970
618	7.23009	7.42265	618	0.970743	33	2	3	7.31907	1069.5			236246
619	7.22454	7.27762	619	0.999848	9	1	2	7.25135	278.151			126957
620	7.24073	7.27317	620	0.998815	5	1	2	7.25614	372.089			36115
621	7.26425	7.42265	621	0.999958	14	1	2	7.33377	281.213			34682
622	7.27317	7.30005	622	0.999443	5	1	2	7.28811	295.136			145887
623	7.28822	7.35609	623	0.999756	13	1;2	2	7.32176	866.421			79485
624	7.26425	7.35163	624	0.997624	6	1	2	7.30788	256.959			66869
625	7.30005	7.40754	625	0.999242	12	1	2	7.35959	212.915			109555
626	7.31189	7.40201	626	0.999965	8	1	2	7.35312	216.952			39213
627	7.32277	7.37392	627	0.999911	8	1	2	7.34671	238.141			188616
628	7.31189	7.66551	628	0.999934	46	1	2	7.4704	278.151			145166
629	7.32277	7.35163	629	0.999201	3	1	2	7.33381	276.918			36491
630	7.30597	7.39609	630	0.995612	9	1	2	7.35347	372.09			43674
632	7.365	7.50296	632	0.998499	17	1	2	7.4324	387.21			138052
633	7.37838	7.46401	633	0.996362	8	1	2	7.41757	226.229			37007
634	7.37838	7.41819	634	0.929122	3	3	2	7.39275	761.823			27070
635	7.35609	7.42265	635	0.999106	4	1	2	7.39089	251.151			21680
636	7.35609	7.39609	636	0.99985	3	1	2	7.37662	222.056			32364
637	7.38426	7.41819	637	0.996482	4	1	2	7.39736	256.959			70616
638	7.39609	7.43727	638	0.985919	5	1	2	7.41779	740.186			65102
639	7.40754	7.55814	639	0.985568	18	1	2	7.48841	444.112			61878
640	7.42265	7.4551	640	0.996897	6	1	2	7.43631	295.136			142612
641	7.42265	7.44173	641	1	3	1	2	7.43287	326.193			35628
642	7.40754	7.69589	642	1	35	1	2	7.54519	238.141			200699
643	7.4271	7.67866	643	0.99746	20	1	2	7.5528	372.089			37197
644	7.44173	7.53139	644	0.999953	11	1	2	7.48628	216.952			35966
645	7.4551	7.60395	645	0.999316	14	1	2	7.53101	212.915			92372
646	7.45064	7.49208	646	0.995803	4	1	2	7.46925	281.213			28821
647	7.46401	7.56405	647	0.929344	12	1	2	7.52152	740.186			58048
648	7.45956	7.49764	648	0.995504	3	1	2	7.48004	213.082			26875
649	7.47433	7.50868	649	0.999895	4	1	2	7.49506	254.26			25137
650	7.49208	7.55814	650	0.997294	8	1	2	7.5197	256.96			97756
651	7.51357	7.53585	651	0.999661	4	1	2	7.52626	295.136			129600
652	7.51357	7.67297	652	0.999769	20	1	2	7.58849	216.1			43398
653	7.53139	7.60395	653	0.99984	9	1	2	7.56766	281.214			33256
654	7.53585	7.55368	654	0.924813	3	3	2	7.54681	761.824			24592
655	7.51802	7.68825	655	0.999769	29	1	2	7.61435	501.253			240014
656	7.53139	7.56996	656	0.997001	6	1	2	7.54881	251.151			27970
657	7.52694	7.61287	657	0.999956	7	1	2	7.56563	326.193			30973
658	7.56996	7.58332	658	0.997044	3	1	2	7.57705	295.136			131207
659	7.55368	7.65366	659	0.999996	8	1	2	7.6079	254.26			32804
660	7.59461	7.67297	660	0.996437	7	1	2	7.62686	256.96			89505
661	7.5995	7.69589	661	0.949128	12	1	2	7.64067	740.186			60439
662	7.5995	7.68825	662	0.999875	11	1	2	7.6401	216.952			37194
663	7.59461	7.62904	663	0.987059	4	1	2	7.60994	444.111			54451
664	7.61287	7.67297	664	1	6	1	2	7.63995	276.918			40719
665	7.63437	7.67297	665	0.999707	5	1	2	7.64976	281.214			36031
667	7.62349	7.65958	667	0.975056	4	3	2	7.64647	761.706			47520
669	7.65366	7.74597	669	0.971864	11	2	2	7.69923	940.422			160249
670	7.66551	7.91208	670	0.986175	50	2;3	3	7.77921	965.337			1449976
671	7.64328	7.69589	671	0.999461	6	1	2	7.67657	212.915			88300
672	7.68379	7.89383	672	0.98849	33	2;3	3	7.78282	949.372			546750
673	7.68379	7.73414	673	0.979777	5	2	3	7.70956	1170.51			84895
674	7.71245	7.883	674	0.973266	16	2	3	7.78715	987.319			186049
675	7.7267	7.81846	675	0.966606	7	2	3	7.78119	1003.28			174167
676	7.70699	7.77755	676	0.990212	4	4	2	7.74824	935.775			174760
677	7.7865	8.20117	677	0.999726	78	1	2	7.99354	228.208			108907
678	7.79222	8.20117	678	0.999285	68	1	2	7.9986	326			512863
679	7.79965	8.20117	679	0.998947	68	1	2	8.00208	327.997			505527
680	7.80506	8.1923	680	0.999952	61	1	2	8.01308	390.276			183861
681	7.79965	8.18335	681	0.999242	59	1	2	8.01018	298.118			308276
682	7.81846	8.18335	682	0.996387	42	1	2	8.03367	329.994			166580
683	7.84682	8.11745	683	0.999829	47	1	2	7.96889	569.242			2430860
684	7.85228	8.16644	684	0.999341	43	1	2	8.02225	354.061			139232
685	7.8652	8.07353	685	0.999555	34	1	2	7.96534	591.224			644047
686	7.82585	7.90676	686	0.985992	5	4	3	7.86354	935.774			143466
687	7.85228	8.1923	687	0.999998	46	1	2	8.0271	276.171			94919
688	7.85228	7.883	688	0.999513	4	1	2	7.86819	212.915			78160
689	7.85971	8.16644	689	0.999915	48	1	2	8.03491	218.166			142914
690	7.8652	7.90676	690	0.981176	5	1	2	7.88584	740.187			70683
691	7.8652	7.918	691	0.998836	4	1	2	7.88555	256.96			79262
692	7.85971	7.918	692	0.99723	7	1	2	7.88815	253.902			66886
693	7.85971	8.08691	693	0.993959	30	2;1	2	7.97149	607.188			374353
694	7.883	7.95105	694	0.996268	6	2	3	7.90994	1078.46			109228
695	7.85971	8.20117	695	0.999999	70	1	2	8.08318	220.146			108886
696	7.883	8.17407	696	0.999998	28	1	2	8.06344	216.951			53103
697	7.89383	8.01638	697	0.997689	19	1	2	7.95825	366.163			390146
698	7.96184	7.97309	698	0.999977	3	1	2	7.96683	348.152			238189
699	7.96184	8.1923	699	0.996839	24	1	2	8.08799	256.959			108974
700	7.97309	8.10594	700	0.997574	19	1	2	8.04246	216.099			63190
701	7.98449	8.03506	701	0.979655	3	4	3	8.00629	935.775			124658
702	7.97309	8.17407	702	0.953777	21	1	2	8.08237	740.186			63801
703	7.99043	8.06908	703	1	7	1	2	8.03462	372.09			32335
704	7.97309	8.00716	704	0.99969	3	1	2	7.9959	253.902			50213
705	8.00716	8.04593	705	0.99884	4	1	2	8.01762	348.152			173108
706	8.03506	8.16198	706	0.999987	17	1	2	8.09346	281.213			30474
707	8.03506	8.08691	707	0.999939	6	1	2	8.06387	295.136			131684
708	8.04593	8.17407	708	0.997377	18	1	2	8.09935	253.902			47811
709	8.05125	8.16644	709	0.999847	14	1	2	8.10416	278.151			137640
711	8.06908	8.16644	711	0.999712	13	1	2	8.11527	213.082			35826
712	8.03506	8.17407	712	0.999905	19	1	2	8.11378	238.141			190578
713	8.04593	8.16644	713	0.999402	10	1	2	8.10657	212.915			78093
714	8.04593	8.06462	714	0.960462	3	1	2	8.05724	444.111			45626
715	8.05125	8.13883	715	0.999923	8	1	2	8.10078	276.918			45280
716	8.05571	8.16644	716	0.99991	10	1	2	8.11366	214.131			50814
717	8.09857	8.17407	717	0.999972	10	1	2	8.1413	326.193			26232
718	8.11745	8.21013	718	0.9849	22	2;1	3	8.16026	868.352			135979
719	8.12279	8.17407	719	0.996336	7	2	3	8.14806	906.299			78227
720	8.11186	8.14415	720	0.998831	4	1	2	8.13082	372.089			28583
721	8.11186	8.13347	721	0.996973	3	1	2	8.11967	207.936			21087
722	8.13347	8.16198	722	0.999895	5	1	2	8.14647	647.263			67270
723	8.14415	8.47307	723	0.999946	48	1;2	2	8.27727	795.384			12746115
724	8.14861	8.26462	724	0.996594	13	2	3	8.21269	1055.45			367394
726	8.13347	8.16644	726	0.991744	3	3	2	8.15011	761.706			34462
727	8.14861	8.50631	727	0.996852	55	2;1	3	8.27899	998.463			30878734
728	8.16198	8.41817	728	0.979701	53	2;3	3	8.28415	1036.41			3549009
729	8.17407	8.41817	729	0.978465	27	2	3	8.27739	1020.44			1882102
730	8.34201	9.41858	730	0.997498	240	1	2	8.87418	234.161			501726
731	8.34946	8.46772	731	0.978759	17	2	2	8.39114	971.416			307779
732	8.34201	8.39072	732	0.971743	3	2	3	8.3592	1042.46			176604
733	8.34946	8.40728	733	0.99163	6	4	2	8.38375	935.775			140118
734	8.37143	8.43263	734	0.994159	8	1	2	8.39501	768.336			127435
735	8.36553	9.09996	735	0.999524	150	1	2	8.7304	220.146			109785
736	8.36553	9.18041	736	0.999713	134	1	2	8.75702	228.208			106294
737	8.37143	8.68282	737	0.972813	29	1	2	8.53475	740.185			75867
738	8.37143	9.12834	738	0.998395	136	1	2	8.76391	326			512635
739	8.37143	9.12834	739	0.998001	137	1	2	8.76025	327.997			482252
740	8.37886	9.12834	740	0.999517	137	1	2	8.75681	298.118			323767
741	8.37143	9.13898	741	0.999376	136	1	2	8.76012	390.275			173919
742	8.34946	9.40228	742	0.999779	181	1	2	8.8691	227.224			176061
743	8.34946	9.37805	743	0.996634	334	1	2	8.85928	282.167			190605
744	8.37143	9.12834	744	0.997112	135	1	2	8.74809	370.093			178815
746	8.3848	9.11771	746	0.999788	134	1	2	8.76205	218.167			142301
747	8.37886	9.09996	747	0.999888	108	1	2	8.72727	354.062			136215
748	8.3848	9.10886	748	0.996774	100	1	2	8.77704	329.994			151107
750	8.40728	8.78923	750	0.997281	42	1	2	8.6173	256.96			126575
751	8.3848	9.10886	751	0.998087	101	1	2	8.74561	276.172			100961
752	8.3848	8.86281	752	0.999477	51	1	2	8.64144	216.099			54382
753	8.41283	8.48964	753	0.993966	11	2	3	8.44103	776.27			406880
754	8.41817	8.60892	754	0.999082	23	1	2	8.52287	233.944			119131
755	8.39072	8.70957	755	0.999259	31	1	2	8.5386	214.131			85582
756	8.40136	9.04028	756	0.999929	79	1	2	8.71645	253.902			53661
757	8.40136	9.08039	757	0.999616	95	1	2	8.76628	216.952			64646
758	8.41283	8.47307	758	0.999688	5	1	2	8.43753	276.917			54009
759	8.43263	9.08039	759	0.999959	98	1	2	8.76187	238.141			201822
760	8.44327	9.08926	760	0.99999	76	1	2	8.77569	278.151			130067
761	8.44327	8.55537	761	0.999651	11	1	2	8.50766	212.915			54781
762	8.44327	8.48964	762	0.999979	6	1	2	8.46512	213.082			31354
763	8.43263	8.46215	763	0.995133	3	1	2	8.44688	326.193			23617
764	8.46215	8.95776	764	0.999708	53	1	2	8.69983	281.214			36719
765	8.44884	8.51699	765	0.980772	5	1	2	8.48611	207.936			22216
766	8.47307	8.63267	766	0.999995	14	1	2	8.56373	295.136			127498
767	8.52145	8.53649	767	0.999864	3	1	2	8.52853	375.163			94159
768	8.52145	8.67768	768	0.999996	12	1	2	8.59156	326.193			35203
769	8.5259	8.5498	769	0.991929	3	4	2	8.53656	935.774			107860
770	8.51208	8.6	770	0.980495	6	1	2	8.5652	444.112			45861
771	8.5259	8.595	771	0.998148	5	1	2	8.56215	372.088			27259
772	8.56664	8.67195	772	0.999055	8	1	2	8.61426	207.936			22863
773	8.56664	8.67768	773	0.997905	8	1	2	8.62108	213.082			29831
774	8.57759	9.08039	774	0.998235	66	1	2	8.83584	276.918			64672
775	8.58917	8.70065	775	0.999969	9	1	2	8.64793	212.915			51066
776	8.58351	8.63858	776	0.999827	4	1	2	8.61099	254.26			20939
777	8.57223	8.61338	777	0.999935	3	1	2	8.59229	251.151			18426
778	8.60446	9.40228	778	0.991735	96	4	2	8.98943	935.775			142968
779	8.60892	8.62675	779	0.999108	3	1	2	8.6164	298.25			35975
780	8.58917	8.62229	780	0.995534	3	1	2	8.6081	369.874			16882
781	8.61783	8.75271	781	0.992872	38	3;2	3	8.68986	1370.54			134575
782	8.60892	8.82443	782	0.97805	15	6	3	8.72322	1277.49			52867
783	8.66603	8.71403	783	0.997039	7	2	3	8.69633	1017.4			63381
784	8.67195	8.6962	784	0.993966	5	2	3	8.68228	996.446			52631
785	8.6607	8.78477	785	0.999215	12	1	2	8.73474	233.944			121143
786	8.70957	8.89847	786	0.978343	19	1	2	8.80406	740.186			62609
787	8.71848	8.82443	787	0.999602	8	1	2	8.77002	207.936			26350
788	8.72441	8.81888	788	0.999947	9	1	2	8.78144	326.193			34091
789	8.73587	8.8026	789	0.999728	7	1	2	8.76842	212.915			54575
790	8.73587	8.8026	790	0.997724	8	1	2	8.76586	213.082			25824
791	8.76049	8.79368	791	0.999948	6	1	2	8.77839	295.136			117723
792	8.76049	8.81888	792	0.987116	10	1	2	8.7935	444.111			48371
793	8.78031	8.80706	793	0.991241	5	1;2	3	8.79551	868.352			38526
794	8.81888	9.06256	794	0.996287	30	1	2	8.95411	256.96			150867
795	8.80706	8.86281	795	0.999125	3	1	2	8.8364	235.931			131690
796	8.82443	9.04473	796	0.999949	19	1	2	8.91986	295.136			123818
797	8.85318	8.91622	797	0.987217	7	1	2	8.87928	444.111			45657
798	8.85318	8.9533	798	0.984853	9	3	2	8.89648	761.707			42481
799	8.86727	8.90439	799	0.998616	4	1	2	8.88555	372.09			23624
800	8.88064	8.89847	800	0.982892	3	6	3	8.8904	1277.49			52994
801	8.89401	8.93346	801	0.99812	5	1	2	8.91718	222.056			22965
802	8.88955	8.9845	802	0.999762	8	1	2	8.93755	233.944			109823
803	8.89401	8.94439	803	0.99993	3	1	2	8.91709	212.915			47563
804	8.89847	8.93346	804	0.999998	3	1	2	8.912	216.098			68364
805	8.90439	8.94884	805	0.990232	3	1	2	8.92753	251.151			18288
807	8.93346	9.06256	807	0.986977	16	1	2	9.00051	740.186			58672
808	8.95776	8.98005	808	0.989792	4	6	3	8.96717	1277.49			40532
809	8.95776	9.14968	809	0.999349	12	1	2	9.04375	235.931			139023
810	8.96222	9.0037	810	0.985792	4	2	3	8.98218	868.352			33774
811	8.98005	8.99633	811	0.941262	3	3	2	8.98706	761.706			39524
812	8.9845	9.08039	812	0.999837	9	1	2	9.04398	281.214			32938
813	8.98005	9.05811	813	0.999955	6	1	2	9.02271	216.099			41626
814	9.02047	9.06702	814	0.998875	4	1	2	9.0433	372.09			29317
815	9.03136	9.07148	815	0.998487	7	1	2	9.04887	341.148			102078
816	9.02602	9.05365	816	0.999997	4	1	2	9.03817	207.936			32900
817	9.02602	9.08039	817	0.983361	5	6	3	9.05332	1277.49			42842
818	9.0037	9.04473	818	0.974444	3	1	2	9.02371	444.112			44476
819	9.03136	9.07593	819	0.999846	4	1	2	9.05594	233.943			106977
821	9.05365	9.26126	821	0.993303	57	2;3	3	9.15203	1306.54			2242281
822	9.06702	9.08926	822	0.999857	5	1	2	9.07782	253.941			49531
823	9.09996	9.24428	823	0.988552	21	2	3	9.16583	979.353			371454
824	9.08039	9.17154	824	0.99676	6	2	3	9.14692	1344.48			166784
826	9.18041	9.39016	826	0.999425	36	1	2	9.27987	326			483756
827	9.18041	9.40228	827	0.999022	37	1	2	9.28466	327.997			454508
828	9.18041	9.37212	828	0.997358	34	1	2	9.27478	298.118			294846
829	9.18779	9.37212	829	0.999977	31	1	2	9.28136	218.167			148686
830	9.18779	9.36467	830	0.999992	30	1	2	9.27818	370.093			135098
831	9.18041	9.20091	831	0.998569	3	1	2	9.18921	256.96			113612
832	9.18041	9.39016	832	0.998626	21	1	2	9.27849	329.994			137321
833	9.18779	9.39016	833	0.997967	34	1	2	9.28629	390.276			168906
834	9.20091	9.3572	834	0.999997	25	1	2	9.28042	220.146			92514
835	9.21762	9.2496	835	0.999979	5	1	2	9.22868	253.902			46774
836	9.21229	9.29609	836	0.999966	9	1	2	9.2509	216.099			57863
837	9.21229	9.34656	837	0.986167	19	1	2	9.27232	354.061			111733
838	9.21229	9.26126	838	0.999255	6	1	2	9.23399	233.944			121506
839	9.22828	9.39016	839	0.999681	38	1	2	9.30642	228.135			85597
840	9.23361	9.27901	840	0.995242	7	2	3	9.254	1152.55			50698
841	9.23894	9.29051	841	0.999219	7	1	2	9.26998	326.193			33141
842	9.22295	9.34656	842	0.999511	17	1	2	9.28782	238.141			191030
843	9.20683	9.3572	843	0.99772	15	1	2	9.28642	276.172			79352
844	9.21229	9.36467	844	0.982376	16	1	2	9.28852	740.187			55146
845	9.23894	9.34656	845	0.999626	14	1	2	9.29586	276.918			48467
846	9.25552	9.31926	846	0.993204	6	2;1	3	9.29044	868.353			60504
847	9.24428	9.33878	847	0.999643	11	1	2	9.29451	278.151			118306
848	9.24428	9.37805	848	0.999689	18	1	2	9.30758	216.952			61644
849	9.25552	9.37805	849	0.982221	22	2	3	9.31201	975.356			165422
850	9.26126	9.37212	850	0.999454	13	1	2	9.31211	256.959			114980
851	9.2496	9.30589	851	0.99973	8	1	2	9.28273	772.277			65944
852	9.25552	9.28458	852	0.997824	3	1	2	9.27027	372.09			24296
853	9.27901	9.30589	853	0.969791	3	2	3	9.2957	1013.3			67184
855	9.30589	9.32818	855	0.970982	3	6	3	9.31538	1277.49			36308
856	9.31481	9.37212	856	0.94895	13	1	2	9.34125	253.941			39266
857	9.28458	9.34656	857	0.999961	8	1	2	9.30938	281.213			27313
858	9.27309	9.31481	858	0.993688	4	1	2	9.29593	221.104			17960
860	9.32372	9.36467	860	0.998168	4	1	2	9.34604	216.099			62603
861	9.33878	9.39016	861	0.953709	7	2	3	9.36919	1020.41			168065
862	9.31035	9.41115	862	0.966191	12	2	3	9.37856	1036.37			409912
863	9.3572	9.41858	863	0.996301	8	2	3	9.39835	1069.5			444935
864	9.36467	9.41115	864	0.954938	6	3	3	9.39324	1526.73			189198
868	9.40228	9.60247	868	0.950999	36	2;3	3	9.4852	1192.51			3092928
869	9.41858	9.52201	869	0.9507	12	2	3	9.48	1176.55			2911524
870	9.43601	9.62262	870	0.999337	23	1	2	9.50556	720.265			6203372
871	9.42726	9.46209	871	0.991646	5	2	2	9.44872	933.475			1427304
873	9.54806	9.62262	873	0.984614	12	2;1	2	9.5694	736.23			1445029
874	9.56582	9.77729	874	0.990572	35	2	3	9.6549	1113.49			1429189
875	9.57427	9.87641	875	1	58	1	2	9.72895	234.161			463748
876	9.58297	9.73975	876	0.99995	35	1;2	2	9.65925	910.41			460277
877	9.59182	9.87641	877	0.99999	50	1	2	9.73273	227.224			170897
878	9.60247	9.86741	878	0.988018	41	4	3	9.73444	935.775			104744
879	9.61715	9.86741	879	0.998245	46	1	2	9.74293	327.997			457667
880	9.61715	9.87641	880	0.999367	45	1	2	9.74847	298.118			279315
881	9.61118	9.71746	881	0.977787	25	3;2	3	9.65567	1151.44			197031
882	9.59182	9.87641	882	0.998414	91	1	2	9.74443	282.167			172357
883	9.60247	9.85847	883	0.999394	44	1	2	9.74077	228.135			77257
884	9.62262	9.88233	884	0.998615	46	1	2	9.75414	326			462694
885	9.62262	9.87641	885	0.998706	43	1	2	9.75559	390.275			183344
886	9.61715	9.86741	886	0.999104	46	1	2	9.74275	218.166			146377
887	9.61715	9.86741	887	0.999621	40	1	2	9.7512	216.951			68693
888	9.62262	9.71216	888	0.953558	12	2	3	9.66072	1135.47			101361
889	9.62262	9.86741	889	0.999295	36	1	2	9.76089	220.146			98886
890	9.63859	9.73083	890	0.9928	11	2	3	9.68093	1170.51			95366
891	9.63859	9.67709	891	0.993361	4	2	3	9.65999	825.347			103824
892	9.63327	9.89123	892	0.999637	39	1	2	9.77565	370.092			186939
893	9.62795	9.85108	893	0.997272	28	1	2	9.7441	354.061			114565
894	9.61118	9.64923	894	0.995996	3	1	2	9.62474	383.812			84758
895	9.62262	9.86741	895	0.996326	35	1	2	9.75503	329.994			146529
896	9.61715	9.65661	896	0.999631	3	1	2	9.63655	235.93			120333
897	9.63327	9.66929	897	0.999537	3	1	2	9.64942	233.944			112125
898	9.65661	9.73083	898	0.988783	10	1	2	9.70187	740.186			61941
899	9.66379	9.76028	899	0.999458	12	1	2	9.71095	236.115			62457
900	9.65661	9.69532	900	0.987617	3	2	2	9.67101	981.448			52117
901	9.66379	9.77729	901	0.998332	13	1	2	9.72095	276.172			88437
902	9.66929	9.73529	902	0.990304	14	2;3	3	9.71007	1241.58			76955
903	9.68448	9.81052	903	0.927792	37	3;2	3	9.7352	1434.63			191071
904	9.68997	9.71746	904	0.973744	4	2	3	9.70057	1038.5			94748
905	9.69532	9.71216	905	0.983498	3	2	3	9.70585	1273.56			46652
906	9.70682	9.85847	906	0.971904	27	2;1	3	9.79578	868.352			69274
907	9.68448	9.85847	907	0.998995	18	1	2	9.77802	216.099			42304
908	9.70129	9.79269	908	0.926973	14	2;3	3	9.74108	1363.56			90636
909	9.72192	9.82389	909	0.999276	16	1	2	9.77039	253.941			36476
910	9.70682	9.86741	910	0.999923	19	1	2	9.78561	256.959			118231
911	9.67709	9.72192	911	0.998183	3	1	2	9.70384	326.193			37846
912	9.72192	9.82389	912	0.984816	8	6	3	9.77538	1277.49			32219
913	9.73529	9.85847	913	0.998055	20	1	2	9.80319	276.918			58178
914	9.75453	9.85108	914	0.999435	10	1	2	9.80015	326.192			23500
915	9.74712	9.85108	915	0.999953	15	1	2	9.79457	238.141			196037
916	9.73975	9.85108	916	0.998973	12	1	2	9.79585	281.213			31759
917	9.76028	9.84018	917	0.984028	21	2;3	3	9.79752	1184.53			77156
918	9.76544	9.87641	918	0.983424	15	1	2	9.81337	740.186			62485
919	9.77729	9.79269	919	0.999131	3	1	2	9.78539	235.93			124522
920	9.78288	9.79269	920	0.999603	3	2	3	9.78746	981.447			51714
921	9.78288	9.85847	921	0.989529	11	2	3	9.82183	1154.53			58040
922	9.80161	9.81498	922	0.981021	3	1	2	9.80826	444.112			41330
923	9.80607	9.84596	923	0.998775	7	1	2	9.82138	276.171			83702
924	9.78823	9.82389	924	0.9807	4	1	2	9.81197	221.105			18786
925	9.79715	9.81944	925	0.999703	3	1	2	9.81056	278.151			102260
926	9.77729	9.81944	926	0.999624	4	1	2	9.80211	298.25			27740
927	9.79715	9.81944	927	0.999708	3	1	2	9.80635	217.976			46543
928	9.78288	9.82835	928	0.973415	5	1	2	9.81072	206.105			16516
929	9.77136	9.80161	929	0.999646	3	1	2	9.78599	207.936			21824
931	9.82835	9.84018	931	0.999999	3	1	2	9.83427	295.136			108975
933	9.84596	10.3219	933	0.992117	78	2;3;1	3	9.98097	979.352			17517638
934	9.85847	10.1375	934	0.986115	53	2;1	2	9.97816	963.387			12562905
935	9.86741	9.89123	935	0.997734	4	2	3	9.88425	1001.33			425740
936	9.89996	9.93556	936	0.967643	4	2	3	9.92373	1920.76			2145693
937	9.99504	10.0556	937	0.914963	5	2	3	10.0193	1920.75			2759267
939	10.0901	10.2046	939	0.970418	12	2	3	10.1494	927.426			334436
940	10.0991	10.2638	940	0.971542	45	2;1	3	10.1749	868.352			830844
941	10.0991	10.2337	941	0.982606	17	2	3	10.1463	1113.49			950652
942	10.0991	10.6167	942	0.997863	89	1	2	10.3664	234.161			463723
943	10.1078	10.1972	943	0.992208	11	1	2	10.1469	910.41			356773
944	10.1078	10.6167	944	0.999718	83	1	2	10.3681	227.224			207873
945	10.1078	10.6167	945	0.991046	79	4	2	10.3624	935.774			89649
946	10.1286	10.2638	946	0.958444	21	3	4	10.1835	1597.76			660981
947	10.1286	10.2446	947	0.980243	16	2	3	10.1773	906.299			392000
948	10.1078	10.6167	948	0.998541	150	1	2	10.381	282.167			176267
949	10.0638	10.5938	949	0.999353	76	1	2	10.3725	326			477567
950	10.1286	10.2446	950	0.999427	14	1	2	10.1738	665.273			347751
951	10.1375	10.2159	951	0.999847	8	1	2	10.1738	647.263			196421
952	10.1464	10.2337	952	0.999426	5	1	2	10.187	235.93			129843
953	10.1286	10.2446	953	0.960971	22	3;2	3	10.1765	1394.68			355798
954	10.1824	10.5938	954	0.998675	72	1	2	10.3934	327.997			432869
955	10.1898	10.5938	955	0.99962	74	1	2	10.3937	390.275			161849
957	10.1824	10.5938	957	0.999549	67	1	2	10.4086	228.147			78745
958	10.1898	10.6167	958	0.999999	69	1	2	10.3987	218.166			139043
959	10.1898	10.2446	959	0.998967	10	2	3	10.2171	1194.61			118833
960	10.1898	10.5938	960	0.999666	62	1	2	10.39	216.951			73294
961	10.2104	10.5938	961	1	70	1	2	10.4022	298.118			293786
962	10.2104	10.5757	962	0.999412	52	1	2	10.3993	329.994			134898
963	10.2104	10.5648	963	0.994808	45	1	2	10.4026	740.186			61436
964	10.2278	10.2967	964	0.99994	6	1	2	10.2622	238.141			181623
965	10.2337	10.4142	965	0.999133	31	2	3	10.3079	1242.53			369883
966	10.2278	10.5831	966	0.999633	44	1	2	10.4005	253.902			38679
967	10.2278	10.3326	967	0.999978	6	1	2	10.2789	281.213			34614
968	10.2159	10.5831	968	0.999686	57	1	2	10.3994	370.093			112641
969	10.2219	10.3022	969	0.999862	15	1	2	10.2593	220.146			71044
970	10.2337	10.5757	970	0.999897	28	1	2	10.4026	278.151			117575
971	10.2104	10.3022	971	0.998878	13	1	2	10.2623	276.918			61338
972	10.2393	10.2892	972	0.99941	8	1	2	10.2598	216.098			76239
973	10.2446	10.3075	973	0.98612	5	2	3	10.2702	963.386			59093
974	10.258	10.3919	974	0.982829	38	3;2	3	10.3163	1441.66			280577
975	10.258	10.3618	975	0.995596	18	2	3	10.3186	1238.58			322415
976	10.2337	10.2682	976	0.999824	5	1	2	10.2532	326.193			29201
977	10.2337	10.3075	977	0.998149	7	1	2	10.2698	256.959			110891
978	10.2159	10.2446	978	0.999559	3	1	2	10.2312	255.255			31587
979	10.2393	10.2967	979	0.999219	6	1	2	10.2695	276.172			74482
980	10.2491	10.2967	980	0.93859	5	6	3	10.267	1277.49			27026
981	10.2393	10.2682	981	0.98107	3	1	2	10.2563	742.184			23008
982	10.2682	10.3219	982	0.991924	6	2	3	10.2941	1427.61			46120
983	10.2682	10.3075	983	0.999493	3	1	2	10.286	235.93			115301
984	10.2892	10.4858	984	0.992422	24	1	2	10.3842	354.061			92481
985	10.258	10.3022	985	0.965181	4	1	2	10.2873	207.936			19799
986	10.3022	10.3964	986	0.999271	17	2	3	10.3486	940.375			421696
987	10.3326	10.3512	987	0.999822	3	2	3	10.34	922.364			53843
988	10.3457	10.5542	988	0.999753	22	1	2	10.4514	238.141			179087
989	10.3379	10.5938	989	0.999189	43	1	2	10.4642	220.145			94911
990	10.3457	10.4053	990	0.997017	6	1	2	10.3735	256.959			120438
991	10.3512	10.3919	991	0.982744	4	1	2	10.3647	742.183			38193
992	10.3457	10.4334	992	0.999961	7	1	2	10.3867	326.193			27801
993	10.3457	10.5938	993	0.996702	33	1	2	10.4549	276.918			65338
994	10.381	10.5138	994	0.998706	16	1	2	10.4497	276.172			81262
995	10.381	10.4334	995	0.994547	12	2	3	10.4064	1184.53			84400
996	10.381	10.5831	996	0.999876	30	1	2	10.4699	216.098			80960
997	10.3964	10.4903	997	0.96071	14	2;3	3	10.4481	1427.65			75178
998	10.4142	10.4378	998	0.999426	3	1	2	10.4262	298.25			39813
999	10.4289	10.476	999	0.974	8	2	3	10.4466	1224.57			57216
1001	10.3919	10.476	1001	0.981417	7	3	2	10.4308	761.707			29759
1002	10.4289	10.5831	1002	0.998883	15	1	2	10.5062	281.213			34726
1003	10.4467	10.476	1003	0.910062	3	6	3	10.4622	1277.49			29127
1004	10.4423	10.5413	1004	0.999991	6	1	2	10.49	222.005			38766
1005	10.4571	10.5138	1005	0.999336	5	1	2	10.4853	206.977			47269
1006	10.4645	10.4992	1006	0.996211	4	1	2	10.4805	256.959			122183
1007	10.4645	10.4903	1007	0.999951	3	1	2	10.4811	326.193			31586
1008	10.4814	10.5757	1008	0.993239	25	2;1	2	10.5261	593.29			274008
1009	10.4645	10.4858	1009	0.999996	3	1	2	10.4765	295.136			119169
1010	10.4645	10.4903	1010	0.986675	3	1	2	10.4783	207.936			18248
1011	10.4814	10.4992	1011	0.997786	4	1	2	10.4912	305.234			33984
1012	10.4814	10.5037	1012	0.999998	3	1	2	10.4922	213.082			31870
1013	10.4903	10.5757	1013	0.999646	15	1	2	10.5349	461.238			117077
1014	10.4814	10.5138	1014	0.944262	4	1	2	10.4983	444.111			36251
1015	10.476	10.4903	1015	0.954264	3	1	2	10.483	255.255			33774
1016	10.5244	10.5831	1016	0.995493	8	1	2	10.5522	354.061			70360
1017	10.5353	10.5542	1017	0.999929	3	1	2	10.5429	256.959			111312
1018	10.5244	10.5542	1018	0.926476	3	1	2	10.5393	221.104			19014
1019	10.5542	10.5757	1019	0.990422	3	1	2	10.5672	276.172			77036
1020	10.5353	10.5757	1020	0.986015	3	2	2	10.5581	979.352			39607
1021	10.5542	10.8483	1021	0.998181	47	2;3	3	10.6632	1184.53			19190900
1022	10.5757	10.7859	1022	0.986107	42	2;3	4	10.665	1222.47			1833524
1023	10.5757	10.777	1023	0.999919	44	2;1	2	10.6604	981.448			2242431
1024	10.5831	10.7296	1024	0.94872	12	2	3	10.6597	1206.51			913346
1025	10.6031	10.6769	1025	0.959449	6	2	3	10.6483	1260.42			362143
1026	10.7003	10.8929	1026	0.971994	31	1;2	3	10.7691	939.39			209940
1027	10.7077	11.1511	1027	0.998966	76	1	2	10.9145	227.224			200780
1028	10.7237	11.1762	1028	0.999944	146	1	2	10.9189	282.167			183119
1029	10.7296	11.1287	1029	0.997587	73	1	2	10.9172	390.276			159572
1030	10.7356	11.0922	1030	0.997391	49	1	2	10.918	329.994			136366
1031	10.7077	11.1151	1031	0.98958	54	4	2	10.9055	935.775			80869
1032	10.7077	11.1762	1032	0.997303	85	1	2	10.9193	234.161			503864
1033	10.7237	11.1151	1033	0.99947	72	1	2	10.9181	326			435158
1034	10.7296	11.1029	1034	0.998717	72	1	2	10.914	298.118			319146
1035	10.7237	10.7859	1035	0.999633	11	1	2	10.7476	568.248			185695
1036	10.7237	11.1287	1036	0.999994	68	1	2	10.9099	218.166			144391
1037	10.7296	11.0922	1037	0.999874	61	1	2	10.9265	220.146			82358
1038	10.747	10.777	1038	0.999652	6	1	2	10.7615	228.135			62594
1039	10.7415	11.1151	1039	0.999402	65	1	2	10.9304	216.951			83968
1040	10.7415	11.1423	1040	0.999954	63	1	2	11.0468	216.096			708534
1041	10.7296	11.1151	1041	0.999956	72	1	2	10.916	327.997			457263
1042	10.7356	11.0832	1042	0.988175	60	1	2	10.9199	370.093			101031
1044	10.7415	11.1511	1044	1	52	1	2	10.9478	238.141			206935
1045	10.747	10.8483	1045	0.999558	11	1	2	10.8036	354.061			81866
1046	10.747	10.82	1046	0.994453	12	2	3	10.7801	1099.51			73273
1047	10.7415	10.777	1047	0.967208	4	1	2	10.7584	255.255			30926
1048	10.747	10.7992	1048	0.934917	5	3	2	10.7763	761.706			27076
1049	10.766	10.9505	1049	0.996694	24	1	2	10.8497	278.151			116727
1050	10.7601	10.8661	1050	0.997985	12	2	3	10.8076	456.271			65423
1051	10.7415	11.1029	1051	0.999542	49	1	2	10.9427	276.918			61553
1052	10.7415	10.7859	1052	0.929537	3	1	2	10.7609	740.187			56747
1053	10.7415	11.0475	1053	0.999631	32	1	2	10.8935	253.941			39018
1054	10.777	10.9728	1054	0.999529	20	1	2	10.8765	281.214			34245
1055	10.777	10.9101	1055	0.999435	12	1	2	10.8497	298.249			35302
1056	10.7601	10.7903	1056	1	3	1	2	10.7776	206.977			49410
1057	10.777	10.7992	1057	0.999952	4	1	2	10.7906	326.193			23798
1058	10.7992	10.8527	1058	0.989754	5	1	2	10.8222	226.975			18827
1059	10.8037	10.9416	1059	0.999633	13	1	2	10.8807	256.959			124465
1060	10.82	10.8432	1060	0.999149	4	1	2	10.8303	295.136			108774
1061	10.82	11.0922	1061	0.999567	28	1	2	10.9516	740.186			56632
1062	10.82	10.9772	1062	0.997722	31	2	3	10.8998	996.447			293922
1063	10.8374	10.9042	1063	0.900371	6	1	2	10.8667	255.255			33843
1064	10.8432	10.8661	1064	0.999926	3	1	2	10.854	326.193			23867
1065	10.8432	10.9862	1065	0.998972	17	1	2	10.9216	276.172			75390
1066	10.8318	11.1029	1066	0.999923	42	1	2	10.9735	228.135			70083
1067	10.8259	10.8616	1067	0.99996	4	1	2	10.8499	249.992			30858
1068	10.7903	10.8259	1068	0.988123	4	1	2	10.8098	207.936			16593
1069	10.8661	10.8929	1069	0.999077	4	1	2	10.8841	793.369			68047
1070	10.8661	10.8983	1070	0.937838	5	2	2	10.887	978.438			50253
1071	10.8483	10.9817	1071	0.953032	13	2	3	10.9217	977.337			36544
1072	10.8661	10.9219	1072	0.95434	5	1	2	10.8934	775.358			51917
1073	10.8822	10.8983	1073	0.995228	4	2	3	10.8902	933.474			49213
1074	10.8767	10.9862	1074	0.999313	11	1	2	10.9256	354.061			85282
1075	10.8876	10.9277	1075	0.955768	4	2	3	10.8971	1034.39			60731
1076	10.8983	10.946	1076	0.996555	6	1	2	10.9261	326.193			23753
1077	10.9277	11.0773	1077	0.937312	23	1;2	3	10.9913	939.39			90162
1079	10.9416	10.955	1079	0.999932	3	1	2	10.9489	295.136			117567
1080	10.946	10.998	1080	0.980651	5	3	2	10.9696	761.706			29286
1081	10.9416	10.9594	1081	0.959038	3	1	2	10.9497	226.975			19451
1082	10.9219	10.9862	1082	0.972493	5	1	2	10.9581	444.112			41151
1083	10.916	10.9639	1083	1	3	1	2	10.94	222.005			29520
1084	10.955	10.9728	1084	0.998977	3	1	2	10.9628	742.184			23132
1085	10.9594	10.9683	1085	0.999013	3	1	2	10.9637	298.25			32656
1086	10.9594	11.0564	1086	0.990135	27	2;3	4	11.0129	1441.66			153536
1087	10.9728	11.0226	1087	0.996572	6	1	2	10.9981	256.959			109532
1088	10.9772	11.1151	1088	0.998215	16	1	2	11.0495	278.151			106213
1089	10.9772	11.0386	1089	0.971938	11	2	3	11.0137	1238.58			156408
1090	10.9728	11.0773	1090	0.999624	12	1	2	11.0295	326.193			31591
1091	11.0039	11.0922	1091	0.997222	15	2	3	11.0461	1099.47			134363
1092	11.0226	11.0608	1092	0.999704	7	1	2	11.0427	896.395			56806
1093	11.0039	11.1029	1093	0.99998	9	1	2	11.0594	281.213			33381
1095	11.0279	11.043	1095	0.998953	3	1	2	11.0362	354.062			74265
1096	11.0333	11.1151	1096	0.998023	9	1	2	11.0733	276.172			86471
1097	11.043	11.0773	1097	0.956416	5	2	3	11.06	1185.48			49241
1098	11.0519	11.0832	1098	0.999978	4	1	2	11.0616	298.25			31578
1099	11.0608	11.1423	1099	0.999859	5	1	2	11.1056	239.172			151574
1100	11.0714	11.2461	1100	0.995499	32	2;3	3	11.1639	1377.57			3704211
1101	11.0475	11.0922	1101	0.992479	5	2	3	11.0712	1370.59			50307
1102	11.0564	11.0714	1102	0.997234	3	1	2	11.0649	256.96			118644
1103	11.0714	11.2726	1103	0.994431	31	2;3	3	11.1628	1313.57			4286493
1104	11.0922	11.1863	1104	0.984001	17	2;3	3	11.1532	1351.51			378916
1105	11.1029	11.1762	1105	0.972278	8	2;3	3	11.1508	1415.52			251627
1106	11.1151	11.16	1106	0.98975	3	2	3	11.1403	1335.55			215821
1107	11.1287	11.3555	1107	0.998027	31	2	3	11.2286	1184.53			7383664
1108	11.0922	11.195	1108	0.998006	10	2	3	11.1515	1110.49			479184
1109	11.1863	11.3383	1109	0.998261	36	3;2	3	11.2351	1222.47			792702
1110	11.1863	11.2961	1110	0.984248	12	2	3	11.2299	1206.51			365505
1111	11.2037	11.3161	1111	0.999993	23	2;1	2	11.2392	981.448			1270594
1113	11.2407	12.4464	1113	0.998246	205	1	2	11.8276	234.161			489829
1114	11.2549	12.4196	1114	0.992823	196	1	2	11.8212	227.224			168256
1115	11.2726	12.3929	1115	0.999872	179	1	2	11.8149	298.118			277886
1117	11.2726	11.9943	1117	0.999634	85	1	2	11.636	218.166			140423
1118	11.2726	12.3033	1118	0.999048	151	1	2	11.7905	228.135			79109
1119	11.28	12.0812	1119	0.999153	108	1	2	11.6945	216.097			71935
1120	11.2652	12.4018	1120	0.999762	186	1	2	11.8072	327.997			448299
1122	11.2726	12.4464	1122	0.997548	352	1	2	11.8182	282.167			187540
1123	11.2726	11.7765	1123	0.943747	49	4	2	11.5023	935.775			69939
1124	11.28	12.3793	1124	0.998529	187	1	2	11.8128	326			467343
1125	11.28	11.3499	1125	0.997391	8	1	2	11.3208	329.994			129364
1126	11.3013	12.4107	1126	0.999757	148	1	2	11.828	216.952			92048
1127	11.2961	11.3872	1127	0.99513	8	1	2	11.3443	276.172			70722
1128	11.2907	11.3555	1128	0.986331	9	2	3	11.3163	1050.39			132374
1129	11.2907	12.4018	1129	0.998552	184	1	2	11.8117	390.276			195102
1130	11.28	11.3102	1130	0.999319	3	1	2	11.2999	235.931			134165
1131	11.3058	12.4196	1131	0.994534	290	2;1	3	12.1456	939.39			1818607
1132	11.3102	11.5003	1132	0.999951	21	1	2	11.4041	238.141			193501
1133	11.2961	11.5677	1133	0.998247	40	1	2	11.43	220.146			90478
1134	11.3058	11.5898	1134	0.997595	37	1	2	11.4363	276.918			77352
1135	11.327	11.5003	1135	0.994988	23	1	2	11.4116	370.093			89279
1136	11.3324	11.3827	1136	0.982917	5	2	2	11.3541	977.337			32510
1137	11.3383	11.4023	1137	0.916576	8	2	3	11.3728	2119.71			27310
1138	11.3324	11.3614	1138	0.999837	3	1	2	11.3441	281.213			30863
1139	11.3217	11.4473	1139	0.997658	11	1	2	11.3871	256.96			122211
1140	11.3217	11.4882	1140	0.999729	14	1	2	11.4168	354.061			95011
1141	11.3383	11.3674	1141	0.998663	4	1	2	11.3509	740.185			53194
1142	11.3161	11.3674	1142	0.941562	3	1	2	11.3435	255.256			41886
1143	11.344	11.526	1143	0.999417	18	1	2	11.4262	278.151			117253
1144	11.3614	11.4882	1144	0.999632	24	2	3	11.4171	1134.45			299979
1145	11.3614	11.3783	1145	0.995445	3	2	3	11.3681	1347.56			47363
1146	11.3383	11.3729	1146	0.99991	3	1	2	11.3546	298.25			39200
1147	11.3614	11.3872	1147	0.998643	3	1	2	11.3771	226.975			18053
1148	11.3872	12.2761	1148	0.996405	120	1	2	11.8424	329.994			145272
1149	11.3674	11.4082	1149	0.999641	4	1	2	11.385	326.193			29788
1150	11.3729	11.3917	1150	0.999739	3	1	2	11.3849	249.992			29458
1151	11.3961	11.4882	1151	0.999847	10	1	2	11.4423	281.213			28375
1152	11.4023	11.4414	1152	0.906628	7	1	2	11.4214	740.186			51034
1153	11.4023	11.4748	1153	0.987363	8	1	2	11.432	253.941			23922
1154	11.4082	11.4642	1154	0.99989	4	1	2	11.4309	255.255			31728
1155	11.4138	11.4793	1155	0.962319	5	2	3	11.4444	998.463			77073
1157	11.4138	11.4473	1157	0.984692	3	1	2	11.4339	639.246			36818
1158	11.4023	11.4473	1158	0.998178	3	1	2	11.4214	248.962			31014
1159	11.4299	11.5201	1159	0.996945	7	1	2	11.4665	283.287			22762
1160	11.4414	11.541	1160	0.924308	17	3;2	4	11.4844	1813.74			182112
1161	11.4473	11.4748	1161	0.990971	3	2	3	11.463	1208.57			33121
1162	11.4642	11.573	1162	0.993011	20	2;3	3	11.5252	1394.69			148578
1163	11.4642	11.5843	1163	0.981362	19	3	4	11.5235	1597.76			246454
1164	11.4191	11.4748	1164	0.999181	4	1	2	11.451	219.174			25712
1165	11.4588	11.4837	1165	0.999245	3	1	2	11.4746	235.93			100820
1167	11.4588	11.6201	1167	0.99851	14	1	2	11.5443	276.172			81837
1168	11.4748	11.5465	1168	0.968657	8	1	2	11.5066	740.186			57616
1169	11.4473	11.4944	1169	0.998127	5	2	3	11.4803	969.399			49403
1170	11.4358	11.5003	1170	0.999652	5	1	2	11.473	298.25			38129
1171	11.4248	11.4642	1171	0.99938	3	1	2	11.4429	207.936			23592
1172	11.4944	11.7258	1172	0.99045	41	2;3	3	11.5893	1313.57			683107
1173	11.5003	11.6789	1173	0.999714	25	1	2	11.5813	204.089			793723
1174	11.5335	11.6068	1174	0.989949	9	2	3	11.5663	1110.49			116227
1175	11.526	11.7205	1175	0.999715	38	2;3	3	11.6539	1152.55			436649
1176	11.5571	11.5843	1176	0.997989	3	2	3	11.5722	1351.52			48740
1177	11.5624	11.6142	1177	0.999775	4	1	2	11.585	238.141			174774
1178	11.5518	11.5843	1178	0.999924	3	1	2	11.567	253.941			28849
1179	11.5465	11.5784	1179	0.999618	3	1	2	11.5649	235.931			113859
1180	11.541	11.573	1180	0.992208	3	2	2	11.5588	977.337			48777
1181	11.5955	11.6972	1181	0.999782	16	2	3	11.6515	931.459			305116
1182	11.6142	11.6883	1182	0.991332	10	2	2	11.6476	949.469			177818
1183	11.6201	12.2838	1183	0.99944	99	1	2	11.9598	220.146			84094
1184	11.6142	12.3196	1184	0.987406	65	1	2	11.9767	740.187			72199
1185	11.6201	11.6618	1185	0.999585	3	1	2	11.6445	235.931			124426
1187	11.635	11.6789	1187	0.999657	3	1	2	11.6574	326.193			35213
1188	11.6677	12.1388	1188	0.994831	58	1	2	11.8753	370.093			90981
1189	11.635	12.2716	1189	0.997155	98	1	2	11.9606	276.918			89426
1190	11.6563	11.7031	1190	0.999653	4	1	2	11.6792	217.976			77827
1191	11.6789	11.7659	1191	0.992497	17	2	3	11.7144	1136.55			160759
1192	11.6789	11.9988	1192	0.99998	29	1	2	11.8281	276.172			72310
1193	11.6927	12.2435	1193	0.999979	87	1	2	11.8941	278.126			213522
1194	11.6927	11.9657	1194	0.996769	25	1	2	11.8339	256.959			131855
1195	11.6972	12.1536	1195	0.999747	57	1	2	11.926	238.141			200961
1196	11.7149	12.1477	1196	0.965396	40	1	2	11.9351	253.941			37097
1197	11.7258	11.8316	1197	0.995439	10	1	2	11.7716	354.062			69858
1198	11.6972	12.4018	1198	0.98466	101	2	3	12.2076	977.337			759298
1199	11.7258	11.8631	1199	0.999995	17	1	2	11.7989	281.213			28842
1200	11.7149	11.781	1200	0.997838	5	1	2	11.749	326.193			21085
1201	11.7258	11.7913	1201	0.958458	5	1	2	11.757	255.255			28385
1202	11.7472	11.781	1202	0.999952	4	1	2	11.7696	298.25			27811
1203	11.781	11.9405	1203	0.999389	30	1	2	11.8588	280.105			197835
1204	11.7854	11.8361	1204	0.996491	7	1	2	11.8052	295.136			123357
1205	11.7472	11.8316	1205	0.998497	5	1	2	11.7913	219.174			27300
1206	11.7525	11.7712	1206	0.949193	3	1	2	11.7607	444.111			34625
1207	11.7603	11.821	1207	0.999455	4	1	2	11.7909	249.992			28969
1208	11.7659	11.8522	1208	0.999043	6	1	2	11.8159	235.931			131076
1209	11.8047	11.8316	1209	0.943364	3	2	3	11.8142	1318.54			37166
1210	11.8156	11.9131	1210	0.997584	17	2	3	11.858	1441.63			103798
1211	11.7988	11.8797	1211	0.999987	5	1	2	11.8381	222.005			44738
1212	11.8156	11.8316	1212	0.996661	3	1	2	11.8246	221.105			15115
1213	11.821	11.8578	1213	0.952419	3	4	2	11.8358	935.775			54314
1214	11.8263	11.8463	1214	0.989188	3	1	2	11.8374	226.975			20189
1215	11.8361	11.8737	1215	0.909493	5	1	2	11.8512	255.256			35643
1216	11.8405	11.8915	1216	0.999721	6	1	2	11.8666	298.25			35378
1217	11.8578	11.8737	1217	0.990719	3	1	2	11.8651	283.287			21580
1218	11.8684	11.9184	1218	0.957081	10	3;2	3	11.8943	1384.61			77873
1219	11.8737	11.9943	1219	0.997455	8	1	2	11.9262	326.194			29014
1220	11.8915	11.9514	1220	0.999178	6	1	2	11.9196	235.931			109375
1221	11.8971	12.0865	1221	0.96056	14	4	3	11.9945	935.775			57391
1222	11.8631	11.9514	1222	0.99747	6	1	2	11.9084	207.936			18462
1223	11.8971	11.9346	1223	0.999849	5	1	2	11.9139	281.213			28889
1224	11.9024	11.9461	1224	0.999883	4	1	2	11.9236	310.162			27722
1225	11.9131	11.9988	1225	0.973541	9	1	2	11.9587	283.287			20398
1226	11.9405	11.9899	1226	0.999726	7	1	2	11.9668	354.062			80084
1227	11.9131	11.9846	1227	0.924449	5	1	2	11.947	255.255			32557
1228	11.9405	11.9899	1228	0.999896	6	1	2	11.9652	298.25			28536
1230	11.9899	12.0392	1230	0.978818	6	2	3	12.0155	1400.6			43364
1231	11.9899	12.0134	1231	0.999936	3	1	2	12.0005	219.174			26944
1232	12.0134	12.0629	1232	0.933303	6	3	3	12.0362	1627.73			48610
1233	12.0179	12.0812	1233	0.995083	6	1	2	12.0484	736.312			43599
1234	12.0283	12.0703	1234	0.999178	7	1	2	12.0465	218.167			125802
1235	12.0392	12.2012	1235	0.985258	17	1	2	12.1178	354.062			77477
1236	12.0283	12.1477	1236	0.999681	10	1	2	12.085	281.213			31471
1237	12.0392	12.1062	1237	0.999987	7	1	2	12.065	326.193			28969
1238	12.0436	12.0629	1238	0.999265	3	1	2	12.0528	235.931			116109
1239	12.0223	12.0812	1239	0.999188	4	1	2	12.0504	206.978			60083
1240	12.0392	12.0865	1240	0.996835	5	1	2	12.0667	255.255			35978
1241	12.0436	12.1181	1241	0.999935	5	1	2	12.0823	295.136			141320
1242	12.057	12.3793	1242	0.997378	32	1	2	12.2994	718.3			367803
1243	12.0758	12.1018	1243	0.995983	3	1	2	12.0888	283.287			18026
1244	12.0812	12.0923	1244	0.99962	3	1	2	12.0865	207.936			21260
1245	12.0758	12.129	1245	0.999783	5	1	2	12.1051	276.172			56612
1246	12.057	12.2331	1246	0.996755	11	1	2	12.1518	256.959			135110
1247	12.0865	12.1477	1247	0.999933	6	1	2	12.1145	298.25			37419
1248	12.0973	12.2233	1248	0.972592	21	2	3	12.1561	1313.57			205145
1249	12.1018	12.4196	1249	0.999904	35	1	2	12.2493	218.166			148300
1250	12.1062	12.1719	1250	0.995866	5	2	3	12.1376	1978.69			31118
1251	12.1181	12.1433	1251	0.935213	4	4	3	12.1272	935.775			54928
1253	12.1062	12.2012	1253	0.999656	13	1	2	12.156	216.097			56554
1254	12.1181	12.1477	1254	0.999784	3	1	2	12.1353	217.976			72573
1255	12.1388	12.3793	1255	0.999967	31	1	2	12.3082	736.311			474582
1256	12.1433	12.2621	1256	0.998682	11	1	2	12.2085	326.193			28805
1257	12.1719	12.2672	1257	0.998514	9	1	2	12.2141	370.093			71475
1258	12.1719	12.1959	1258	0.99968	5	1	2	12.1851	276.172			65870
1259	12.1719	12.2672	1259	0.998857	7	1	2	12.2146	255.256			31412
1260	12.1852	12.2716	1260	0.99573	9	1	2	12.2294	281.214			28030
1261	12.2012	12.2621	1261	0.999999	6	1	2	12.226	238.141			199884
1262	12.2071	12.2376	1262	0.999722	3	1	2	12.2205	222.005			44075
1263	12.2178	12.2716	1263	0.99443	6	1	2	12.2402	283.286			25359
1264	12.2331	12.3576	1264	0.994241	10	1	2	12.2872	216.097			97485
1265	12.2071	12.2564	1265	0.999994	3	1	2	12.2322	298.25			32340
1266	12.2761	12.3033	1266	0.999993	3	1	2	12.2908	276.172			70610
1267	12.2672	12.4018	1267	0.937275	5	4	2	12.334	935.774			56028
1269	12.2944	12.363	1269	0.998308	6	1	2	12.334	533.232			184350
1270	12.3122	12.3576	1270	0.994203	4	2	3	12.3385	961.373			114073
1271	12.3377	12.7623	1271	0.992509	84	2;3	3	12.456	1384.61			11031584
1272	12.363	12.5404	1272	0.995558	22	2	3	12.4543	1181.53			2218091
1273	12.3705	12.5732	1273	0.994745	43	3;2	3	12.4543	1422.55			890350
1274	12.3793	12.4872	1274	0.977808	10	2	3	12.4515	1460.5			206525
1275	12.3705	12.5347	1275	0.985271	18	2	3	12.4537	1406.59			570351
1276	12.363	12.4196	1276	0.994445	3	1	2	12.3907	228.135			81142
1277	12.4107	12.4946	1277	0.984862	7	2	3	12.4587	1444.53			222722
1278	12.4872	12.6145	1278	0.999387	21	2	3	12.5293	802.391			607643
1279	12.5035	13.9344	1279	0.997145	285	1	2	13.1913	234.161			508625
1280	12.4872	14.1806	1280	0.997641	545	1	2	13.2647	282.167			209509
1281	12.5035	12.9236	1281	0.99995	50	1	2	12.6927	218.167			136703
1282	12.5216	13.9536	1282	0.999535	264	1	2	13.2081	227.224			170828
1283	12.529	12.5572	1283	0.946074	4	1	2	12.5401	740.185			60694
1284	12.529	13.8903	1284	0.999867	254	1	2	13.1788	326			446213
1285	12.529	13.8903	1285	0.999498	257	1	2	13.1874	327.997			437309
1286	12.529	13.8903	1286	0.999999	251	1	2	13.1776	298.118			281604
1287	12.5216	13.9235	1287	0.993057	253	1	2	13.172	390.276			173074
1288	12.5216	12.6817	1288	0.999188	11	1	2	12.5929	276.172			84040
1289	12.5216	13.796	1289	0.999897	205	1	2	13.2113	228.147			181116
1290	12.5216	13.9146	1290	0.999548	216	1	2	13.1985	216.952			78765
1291	12.5216	12.5572	1291	0.948896	5	4	2	12.535	935.775			57447
1292	12.529	13.8651	1292	0.999392	203	1	2	13.163	276.918			72308
1293	12.5464	13.7217	1293	0.996283	157	1	2	13.1161	329.994			143570
1294	12.5519	12.7476	1294	0.999987	32	1	2	12.6521	278.151			118598
1295	12.5464	13.8739	1295	0.999289	212	1	2	13.1571	220.146			83842
1296	12.5572	12.6448	1296	0.999989	12	1	2	12.5994	281.214			26994
1297	12.5519	13.0928	1297	0.999996	81	1	2	12.8164	238.141			199009
1298	12.5625	12.5866	1298	0.999489	4	1	2	12.5753	249.992			29552
1299	12.5777	12.6027	1299	0.94525	5	2	3	12.5866	1182.51			155275
1300	12.5821	12.7565	1300	0.999855	18	1	2	12.6724	295.136			127619
1301	12.5777	13.0928	1301	0.999926	72	1	2	12.8107	370.093			80613
1302	12.5777	12.7387	1302	0.999415	15	1	2	12.6434	326.193			34396
1303	12.5821	13.0276	1303	0.999682	68	1	2	12.8164	216.099			79579
1304	12.5777	12.6537	1304	0.9597	10	1	2	12.614	253.941			34451
1305	12.5572	12.6582	1305	0.997447	9	1	2	12.6138	256.96			123472
1306	12.5519	12.5866	1306	0.999071	3	1	2	12.5732	235.931			118235
1307	12.5821	12.6403	1307	0.998984	5	2	3	12.6104	594.336			39939
1308	12.6027	12.7431	1308	0.999675	18	1	2	12.6689	222.005			47103
1309	12.6086	12.6403	1309	0.958616	8	2;3	3	12.6235	1827.72			39561
1310	12.6145	12.9058	1310	0.997505	29	1	2	12.7672	255.255			36719
1311	12.5968	12.7993	1311	0.999923	17	1	2	12.6932	298.25			30758
1312	12.5777	12.6671	1312	0.999911	6	1	2	12.6267	226.975			25780
1313	12.5866	12.6205	1313	0.918289	3	1	2	12.6014	740.186			41805
1314	12.6205	12.6715	1314	0.908982	7	1	2	12.6445	283.287			23170
1315	12.6314	12.6626	1315	0.993818	4	1	2	12.6445	354.061			48988
1316	12.6261	12.6582	1316	0.999174	3	1	2	12.6437	249.992			28186
1317	12.6314	12.6626	1317	0.999956	3	1	2	12.6471	310.162			35878
1318	12.6261	12.6671	1318	0.995344	3	1	2	12.6455	207.936			19159
1319	12.6537	13.4756	1319	0.985393	92	1	2	13.0697	740.186			60563
1320	12.676	12.6921	1320	0.950464	3	1	2	12.6843	444.112			32736
1321	12.6671	12.7253	1321	0.975583	4	1	2	12.6931	398.338			40254
1322	12.676	12.8667	1322	0.999815	24	1	2	12.7613	281.214			32379
1323	12.6862	12.8342	1323	0.981697	11	1	2	12.75	253.941			27718
1324	12.6981	12.7342	1324	0.9963	5	1	2	12.7173	256.96			106250
1325	12.6862	12.7208	1325	0.958049	3	2	3	12.6992	1841.73			27713
1326	12.7099	12.7253	1326	0.978205	3	1	2	12.7174	354.061			46261
1327	12.7155	12.7993	1327	0.999848	15	1	2	12.7557	696.269			98036
1328	12.7099	12.7253	1328	0.999383	3	1	2	12.7171	249.992			28059
1329	12.7155	12.8342	1329	0.943207	21	3	4	12.7669	1820.77			99832
1330	12.7253	12.7387	1330	0.999715	4	1	2	12.7321	235.931			116712
1331	12.704	12.7342	1331	0.999466	3	1	2	12.7258	310.162			43157
1332	12.6981	12.7342	1332	0.999916	3	1	2	12.717	217.976			78070
1333	12.7253	12.7342	1333	0.999145	3	1	2	12.7303	266.136			36449
1334	12.7155	12.8208	1334	0.998874	9	1	2	12.7673	276.172			71294
1335	12.7253	12.8208	1335	0.999985	6	1	2	12.778	219.174			30999
1336	12.7431	12.9102	1336	0.996989	32	2	3	12.8245	740.369			263868
1337	12.7565	12.8099	1337	0.999105	4	1	2	12.7774	301.188			93080
1338	12.7756	13.0928	1338	0.999973	40	1	2	12.922	278.151			116003
1340	12.7756	12.8387	1340	0.998161	5	1	2	12.8097	207.936			21442
1341	12.8208	12.9427	1341	0.999755	9	1	2	12.8794	249.992			30021
1342	12.8155	13.0085	1342	0.999525	18	1	2	12.9172	326.193			29459
1343	12.8297	12.9058	1343	0.999803	10	1	2	12.8565	222.005			48749
1344	12.8387	12.8915	1344	0.997196	5	1	2	12.865	285.168			89526
1345	12.8533	12.9472	1345	0.99998	8	1	2	12.9039	283.287			23150
1346	12.8578	12.9013	1346	0.969672	4	1	2	12.8776	226.975			15787
1347	12.8297	12.9013	1347	0.999944	5	1	2	12.8667	295.136			116084
1348	12.8489	12.9102	1348	0.999446	8	2	3	12.8792	955.421			52130
1349	12.8622	12.9058	1349	0.999879	5	1	2	12.8793	298.25			35151
1351	12.8859	12.9191	1351	0.999096	5	1	2	12.9012	276.172			58010
1352	12.8859	12.9013	1352	0.919921	4	2	3	12.8931	1311.55			49000
1353	12.9058	13.0928	1353	0.99948	17	1	2	12.9897	281.214			28950
1354	12.9058	13.0365	1354	0.987681	12	1	2	12.9689	253.941			30412
1355	12.9191	12.9862	1355	0.992529	5	1	2	12.9478	221.105			19178
1356	12.9383	13.0232	1356	0.999967	6	1	2	12.9762	298.25			31956
1357	12.9427	13.0928	1357	0.999202	17	1	2	13.0008	255.256			32109
1358	12.9427	13.0321	1358	0.999993	9	1	2	12.9839	295.136			119731
1359	12.9102	12.9472	1359	0.996416	4	1	2	12.93	256.96			108668
1360	12.9294	12.9472	1360	0.99755	3	1	2	12.9366	226.975			22495
1361	12.9427	13.0187	1361	0.999851	8	1	2	12.9809	222.005			48723
1362	12.9472	13.0085	1362	0.999536	7	1	2	12.9778	398.338			43636
1363	12.9383	13.0757	1363	0.996716	11	1	2	12.9975	260.123			45811
1364	12.9383	12.9951	1364	0.999105	4	1	2	12.9734	266.136			35699
1365	12.9753	12.9996	1365	0.999205	3	1	2	12.99	235.931			111627
1366	12.9907	13.041	1366	0.996334	12	2	2	13.0165	543.311			187932
1367	12.9694	13.0486	1367	0.994882	6	1	2	13.0102	207.936			19793
1368	12.9809	13.0574	1368	0.999721	6	1	2	13.0186	249.992			37519
1369	12.9907	13.1334	1369	0.999137	15	1	2	13.059	218.167			121322
1371	12.9996	13.1289	1371	0.999837	15	1	2	13.0833	261.11			196522
1372	12.9907	13.0276	1372	0.96995	4	2	3	13.0088	1841.73			23186
1373	12.9809	13.0365	1373	0.996586	4	1	2	13.0081	256.96			118296
1374	13.0085	13.1752	1374	0.995273	31	2	3	13.1	810.349			520868
1375	13.041	13.0928	1375	0.999607	7	2	3	13.0746	1457.53			57726
1376	13.0757	13.0928	1376	1	3	1	2	13.0845	582.238			87740
1377	13.0816	13.1752	1377	0.946179	15	2	3	13.1208	1216.51			130211
1378	13.0648	13.264	1378	1	21	1	2	13.1729	216.099			53243
1379	13.0928	13.2107	1379	0.998723	18	1	2	13.1602	354.062			60050
1380	13.1066	13.1585	1380	0.996484	9	2	2	13.1328	708.317			70049
1381	13.12	13.4491	1381	0.999978	57	1	2	13.2955	238.141			197700
1382	13.12	13.4401	1382	0.999955	43	1	2	13.2668	278.151			125486
1383	13.12	13.2063	1383	0.979214	8	1	2	13.161	255.255			30668
1384	13.12	13.1803	1384	0.999594	5	1	2	13.1518	260.123			38693
1385	13.1245	13.2863	1385	0.995236	16	1	2	13.2063	370.093			66235
1386	13.1245	13.3788	1386	0.994587	24	1	2	13.2695	253.941			34110
1387	13.1245	13.2997	1387	0.983469	13	1	2	13.2143	283.287			22248
1388	13.1334	13.1965	1388	0.997734	6	1	2	13.172	256.96			111783
1389	13.1334	13.1847	1389	0.999592	5	1	2	13.1646	310.162			37481
1390	13.1289	13.1965	1390	0.999589	5	1	2	13.1655	249.992			26585
1391	13.1641	13.2952	1391	0.993538	11	1	2	13.2317	276.172			67632
1392	13.1526	13.3425	1392	0.999798	17	1	2	13.262	298.25			32916
1393	13.1752	13.1847	1393	0.999915	3	1	2	13.1804	222.005			53332
1394	13.1803	13.4446	1394	0.998451	22	1	2	13.3142	281.214			32801
1395	13.1965	13.2863	1395	0.970592	10	3	3	13.2342	2093.96			37787
1396	13.1803	13.2018	1396	0.956406	3	1	2	13.1917	444.112			29790
1397	13.1847	13.2196	1397	0.997985	4	1	2	13.1975	219.174			30413
1398	13.1752	13.2478	1398	0.912918	11	3;2	3	13.2206	1836.77			38643
1399	13.1641	13.2063	1399	0.999007	3	1	2	13.1828	207.936			22806
1400	13.1909	13.2534	1400	0.978369	8	2	3	13.2152	1097.53			51852
1401	13.2063	13.458	1401	0.999308	30	1	2	13.3251	218.166			129597
1402	13.2063	13.2419	1402	0.9973	5	1	2	13.2254	326.193			26182
1403	13.2345	13.2774	1403	0.999081	4	1	2	13.2564	249.992			31090
1404	13.2534	13.2774	1404	0.999637	5	1	2	13.2645	295.136			109077
1405	13.2419	13.3878	1405	0.999377	17	1	2	13.303	255.255			29423
1406	13.2419	13.2819	1406	0.991149	5	1	2	13.2634	354.062			54806
1407	13.2685	13.3367	1407	0.998931	6	1	2	13.2978	254.224			26715
1408	13.2729	13.3425	1408	0.978386	11	2	3	13.3046	1182.51			79758
1409	13.2729	13.3086	1409	0.999278	4	1	2	13.2886	235.931			105019
1410	13.2729	13.3175	1410	0.999644	6	1	2	13.2958	326.193			28687
1411	13.2952	13.3175	1411	0.998805	3	1	2	13.3044	226.975			20569
1412	13.3042	13.3367	1412	0.999902	4	1	2	13.3216	295.136			114204
1413	13.3086	13.4357	1413	0.999721	17	1	2	13.3659	216.099			60982
1414	13.3086	13.3308	1414	0.998904	3	1	2	13.3188	249.992			29970
1415	13.3131	13.4011	1415	0.999914	9	1	2	13.357	222.005			50809
1416	13.3234	13.3367	1416	0.931173	3	1	2	13.3306	444.112			31164
1417	13.3086	13.3476	1417	0.994094	3	1	2	13.3293	354.062			51978
1418	13.3175	13.4357	1418	0.997024	16	1	2	13.3758	370.093			69896
1419	13.3367	13.4863	1419	0.924876	39	2;3	4	13.4084	1921.86			138392
1420	13.361	13.4305	1420	0.966455	12	2;3	5	13.3955	1930.82			69066
1421	13.3566	13.4011	1421	0.993223	5	1	2	13.3852	276.172			61040
1422	13.3367	13.3922	1422	0.972974	5	1	2	13.3638	283.287			22946
1423	13.3367	13.3922	1423	0.99657	5	1	2	13.3625	256.96			126952
1424	13.3308	13.3699	1424	0.965063	3	1	2	13.3478	398.338			34579
1425	13.3308	13.3699	1425	0.918965	3	2	3	13.3477	1809.76			28271
1426	13.3566	13.4056	1426	0.9979	6	1	2	13.3811	226.975			22281
1427	13.3833	13.4011	1427	0.999823	3	1	2	13.3947	298.25			32181
1428	13.3967	13.4056	1428	0.999742	3	1	2	13.4013	235.931			115190
1429	13.3922	13.5218	1429	0.999323	38	1;2	2	13.46	673.338			197480
1430	13.4115	13.4624	1430	0.996953	6	1	2	13.4373	326.193			28196
1432	13.4174	13.4401	1432	0.999751	4	1	2	13.4316	255.256			29817
1434	13.4701	13.6678	1434	0.997048	28	1	2	13.549	295.136			133336
1435	13.4809	13.7217	1435	0.999941	46	1	2	13.6005	238.141			202675
1436	13.4701	13.6366	1436	0.997004	22	1	2	13.565	255.256			32440
1437	13.4701	13.4952	1437	0.99152	3	1	2	13.4848	298.25			26669
1438	13.4809	13.5218	1438	0.958846	5	1	2	13.4976	253.941			19861
1439	13.4863	13.5539	1439	0.999198	6	1	2	13.5166	294.157			38217
1440	13.4809	13.4952	1440	0.999787	3	1	2	13.4884	281.213			27544
1441	13.4907	13.7217	1441	0.999996	30	1	2	13.6005	278.151			124575
1442	13.4907	13.5868	1442	0.99988	16	1	2	13.5429	218.166			131758
1443	13.4756	13.6134	1443	0.964082	13	1	2	13.5545	370.093			59569
1444	13.4952	13.6544	1444	0.99999	15	1	2	13.5616	326.193			25293
1445	13.507	13.7537	1445	0.904655	24	1	2	13.6107	740.187			50267
1446	13.4809	13.5272	1446	0.994948	5	1	2	13.5119	276.172			59705
1447	13.5011	13.5361	1447	0.994934	3	1	2	13.5174	283.287			24595
1448	13.5272	13.5673	1448	0.984452	6	3	4	13.5473	2164.98			27522
1449	13.5316	13.5762	1449	0.999865	5	1	2	13.5573	281.214			27765
1450	13.5316	13.641	1450	0.999843	13	1	2	13.5816	222.005			47499
1451	13.5272	13.5673	1451	0.997848	7	2;3	3	13.5503	1809.76			39580
1452	13.5361	13.7019	1452	0.999882	12	1	2	13.6165	298.25			34858
1453	13.545	13.5762	1453	0.998181	4	1	2	13.5571	210.125			18707
1454	13.5316	13.5762	1454	0.985807	5	1	2	13.5559	221.105			21246
1455	13.5494	13.6366	1455	0.998595	9	1	2	13.5883	216.099			58443
1456	13.5272	13.6321	1456	0.9988	8	1	2	13.5936	249.992			37855
1457	13.5584	13.5806	1457	0.960249	3	1	2	13.57	253.941			20456
1458	13.5717	13.6019	1458	0.998835	6	1	2	13.5826	226.975			20282
1459	13.5539	13.5806	1459	0.998681	3	1	2	13.5709	256.96			85564
1460	13.5628	13.5717	1460	0.987596	3	1	2	13.5674	354.061			45332
1461	13.5628	13.5762	1461	0.999246	3	1	2	13.5702	283.287			29737
1462	13.5628	13.6277	1462	0.999364	4	1	2	13.5917	248.962			23005
1463	13.5868	13.65	1463	0.998516	6	1	2	13.6153	260.123			46587
1464	13.6134	13.7019	1464	0.975943	11	2	3	13.648	1389.57			64695
1465	13.6134	13.65	1465	0.997578	6	1	2	13.6274	281.214			28225
1466	13.6188	13.6633	1466	0.902688	5	1	2	13.6351	253.941			24833
1467	13.6232	13.641	1467	0.980816	3	1	2	13.6339	221.105			17701
1468	13.6232	13.7019	1468	0.999032	15	2	3	13.6569	1093.46			116209
1469	13.6019	13.6722	1469	0.998943	6	1	2	13.6389	276.172			68528
1470	13.5868	13.6232	1470	0.971696	3	1	2	13.609	207.936			14797
1471	13.6232	13.678	1471	0.991724	5	1	2	13.6473	354.062			44741
1472	13.6277	13.7173	1472	0.984513	17	3	4	13.6716	1921.86			100425
1473	13.6232	13.6678	1473	0.999695	5	1	2	13.6456	219.174			25806
1474	13.6277	13.65	1474	0.984786	3	2	3	13.6415	1827.71			24184
1475	13.65	13.7173	1475	0.950207	7	3	3	13.6797	1978.88			37606
1476	13.6455	13.6633	1476	0.995437	3	1	2	13.6519	233.944			25457
1477	13.641	13.7907	1477	0.992214	16	1	2	13.716	218.166			126895
1478	13.641	13.6839	1478	0.990138	5	1	2	13.6642	370.093			56515
1479	13.65	13.7173	1479	0.960298	7	3	4	13.6853	2093.95			34334
1480	13.6678	13.7907	1480	0.998191	17	2	2	13.7438	528.337			444703
1481	13.678	13.763	1481	0.997361	6	1	2	13.7174	216.097			40172
1482	13.6722	13.6913	1482	0.997804	3	1	2	13.6819	256.96			99763
1483	13.678	13.7128	1483	0.997158	3	1	2	13.6947	281.214			29223
1484	13.7019	13.8903	1484	0.961177	54	2;3	4	13.7901	1850.82			942608
1485	13.7075	13.8576	1485	0.987279	23	2	3	13.7907	1647.74			369253
1486	13.7128	13.7907	1486	0.999975	8	1	2	13.7423	415.253			204607
1487	13.7128	13.8516	1487	0.994181	7	1	2	13.7883	276.172			60834
1488	13.7279	13.8067	1488	0.952459	6	2	3	13.7777	1872.8			67695
1489	13.74	13.8466	1489	0.954514	21	3;2	4	13.794	1888.77			153186
1490	13.7537	13.8179	1490	0.997747	8	2	2	13.7809	733.312			147784
1491	13.7853	13.8829	1491	0.997415	12	1	2	13.8316	329.994			153084
1492	13.8067	13.8739	1492	0.999975	9	1	2	13.8409	238.141			256485
1493	13.812	13.8739	1493	0.992408	5	1	2	13.8371	740.187			53419
1494	13.8179	13.9344	1494	0.968299	28	3;2	3	13.8799	1907.81			345605
1495	13.8294	13.8829	1495	0.999055	4	1	2	13.8515	235.931			116538
1496	13.8179	13.8829	1496	0.994926	4	1	2	13.8539	216.099			51294
1497	13.8179	13.8353	1497	0.988013	3	1	2	13.8291	255.255			39785
1499	13.8409	13.8829	1499	0.909752	7	2	3	13.8642	1704.72			84057
1500	13.812	13.8516	1500	0.999897	4	1	2	13.8385	281.213			31698
1501	13.8294	13.8829	1501	0.999941	5	1	2	13.857	228.135			56431
1502	13.8466	13.8739	1502	0.982655	4	2;3	3	13.8664	1945.75			59674
1503	13.8651	13.9344	1503	0.999771	5	1	2	13.9019	218.166			177469
1504	13.8651	13.8829	1504	0.937256	3	2	4	13.8755	1929.79			58927
1506	13.8739	13.9477	1506	0.952726	12	2;3	3	13.916	1792.78			268867
1507	13.8829	13.9235	1507	0.918534	3	3	3	13.9082	2164.98			98539
1508	13.8903	14.0646	1508	0.99943	22	1	2	13.9664	647.263			2116829
1509	13.8829	14.0759	1509	0.99594	34	2;1	3	13.9687	888.289			1566452
1511	13.9344	13.985	1511	0.999264	5	1	2	13.9604	872.324			264651
1512	13.9761	14.0059	1512	0.989242	3	2	2	13.9879	926.237			238811
1513	13.9972	14.2074	1513	0.997253	31	1	2	14.085	234.161			467261
1514	13.9972	14.1518	1514	0.965568	41	2;3	4	14.0489	1992.89			615586
1515	14.0166	14.1608	1515	0.999633	24	1	2	14.0874	238.141			410514
1516	14.024	14.1518	1516	0.995381	22	1	2	14.0856	390.276			172571
1517	14.0166	14.1608	1517	0.998835	25	1	2	14.0849	227.224			163526
1518	14.0166	14.1518	1518	0.997163	24	1	2	14.0819	327.997			417265
1519	13.9611	14.0531	1519	0.947823	8	3	4	14.0139	2036.88			192876
1520	14.0166	14.1518	1520	0.999334	24	1	2	14.082	326			420404
1521	14.0294	14.0874	1521	0.997982	10	2	3	14.0518	1789.82			88782
1522	14.0354	14.1518	1522	0.994838	18	1	2	14.097	216.952			73655
1523	14.0413	14.1206	1523	0.905362	14	3	3	14.0789	2118			78998
1524	14.0354	14.1117	1524	0.96469	21	4;3	4	14.0734	2321.08			102644
1525	14.0354	14.1429	1525	0.999999	16	1	2	14.0913	228.135			70571
1526	14.0472	14.1429	1526	0.993979	9	1	2	14.0896	740.186			45563
1527	14.0472	14.1429	1527	0.999782	15	1	2	14.089	276.918			51175
1528	14.0354	14.1518	1528	0.999992	21	1	2	14.0909	298.118			252562
1529	14.0413	14.1698	1529	0.980998	12	1	2	14.0999	218.166			122783
1530	14.0413	14.1266	1530	0.982731	20	3;2	4	14.0809	1898.75			97252
1531	14.0354	14.1266	1531	0.998353	12	1	2	14.0915	329.994			120488
1532	14.0059	14.0815	1532	0.928574	6	3	4	14.0498	2030.84			74053
1533	14.0646	14.1339	1533	0.999933	13	1	2	14.1022	220.146			63886
1534	14.0759	14.1162	1534	0.999998	6	1	2	14.0951	276.172			51929
1535	14.0646	14.1429	1535	0.98947	7	1	2	14.1086	216.099			33295
1536	14.0591	14.0983	1536	0.99843	4	1	2	14.0848	278.151			117407
1537	14.0932	14.1518	1537	0.998753	10	1	2	14.114	283.199			40267
1538	14.0932	14.1339	1538	0.999986	7	1	2	14.1123	298.25			32613
1539	14.0932	14.1339	1539	0.999866	8	1	2	14.1133	827.363			49766
1540	14.0983	14.1339	1540	0.999955	6	1	2	14.1159	326.193			24289
1542	14.1162	14.1429	1542	0.99922	5	2	3	14.1302	847.354			86792
1544	14.0874	14.1339	1544	0.917077	5	4	4	14.1133	2443.09			35835
1545	14.1162	14.1339	1545	0.989376	3	1	2	14.1258	255.255			29989
1547	14.1429	14.1698	1547	0.906611	3	4	3	14.1588	2521.16			79181
1548	14.1518	14.2074	1548	0.98079	5	3	3	14.1824	1841.79			174314
1550	14.1518	14.2943	1550	0.934201	18	3;4	4	14.2136	2044.87			540681
1551	14.1339	14.2996	1551	0.945275	23	2;3	3	14.2162	1760.67			610155
1552	14.1339	14.2835	1552	0.967841	16	2	3	14.2148	1744.71			482768
1554	14.2686	14.432	1554	0.999597	28	1	2	14.3474	234.161			461322
1555	14.2776	14.4034	1555	0.998608	17	1	2	14.346	327.997			410704
1556	14.2686	14.3831	1556	0.93778	25	3;2	3	14.3103	1880.8			178747
1557	14.2776	14.4034	1557	0.999367	17	1	2	14.3452	326			445185
1558	14.2776	14.3551	1558	0.929655	14	3;2	4	14.3133	2036.89			188121
1559	14.2835	14.4124	1559	0.999877	14	1	2	14.35	238.141			419004
1560	14.2776	14.7244	1560	0.99947	43	1	2	14.4692	228.147			544597
1561	14.2686	14.432	1561	0.991851	24	1	2	14.3437	227.224			182229
1562	14.2776	14.4034	1562	0.998795	13	1	2	14.3408	298.118			257342
1563	14.2835	14.4034	1563	0.999453	16	1	2	14.342	390.276			170421
1564	14.2776	14.4212	1564	0.996483	34	1	2	14.3434	282.167			169494
1565	14.3055	14.4212	1565	0.999899	13	1	2	14.3518	216.952			94524
1566	14.3115	14.4034	1566	0.996457	8	1	2	14.3648	329.994			133574
1567	14.3249	14.3945	1567	0.998554	8	1	2	14.3632	276.918			65476
1568	14.3337	14.4409	1568	0.999439	15	2	3	14.3912	978.437			619974
1569	14.3337	14.4124	1569	0.999473	6	1	2	14.375	218.167			143250
1570	14.35	14.432	1570	0.999698	11	1	2	14.3879	775.358			270172
1572	14.3776	14.4034	1572	0.912077	4	3	4	14.3909	1577.74			77716
1573	14.389	14.6271	1573	0.99437	52	3;2	4	14.4827	1921.86			7345970
1574	14.389	14.4034	1574	0.914282	3	3	4	14.395	2158.9			55034
1575	14.3945	14.5822	1575	0.974074	29	3;2	5	14.4771	1959.8			1007056
1576	14.4034	14.5822	1576	0.96754	22	2	3	14.4817	1718.78			1408813
1577	14.4212	14.4946	1577	0.93947	10	4;3	4	14.4599	2514.13			360868
1578	14.432	14.5579	1578	0.903468	14	2;3	4	14.4808	1943.84			357716
1581	14.503	14.753	1581	0.999933	28	1	2	14.6427	227.224			191818
1582	14.5118	14.7622	1582	0.998818	31	1	2	14.6432	234.161			478574
1583	14.5579	14.6271	1583	0.999504	5	1	2	14.5949	326			407677
1584	14.5579	14.6788	1584	0.993842	25	2;3	3	14.6107	1880.79			333868
1585	14.5579	14.6182	1585	0.992331	9	2;3	3	14.5768	1898.75			106893
1587	14.5634	14.6182	1587	0.999788	4	1	2	14.5867	218.166			140304
1588	14.5473	14.6182	1588	0.999978	5	1	2	14.5892	216.951			60720
1589	14.5118	14.6271	1589	0.993	6	1	2	14.5806	327.997			419779
1590	14.5579	14.7622	1590	0.999235	27	1	2	14.6411	282.167			190959
1591	14.5747	14.6093	1591	0.981848	4	1	2	14.592	390.276			157822
1592	14.5747	14.6271	1592	0.964211	5	2	3	14.6034	1677.72			103294
1593	14.5822	14.6093	1593	0.999988	3	1	2	14.5945	238.141			468535
1594	14.5897	14.7352	1594	0.992699	27	2;3	4	14.6506	1978.84			514554
1595	14.6005	14.7441	1595	0.964612	35	2;3	3	14.6707	1888.73			498775
1596	14.6093	14.7441	1596	0.946236	16	2	4	14.6668	1872.77			411097
1597	14.6005	14.654	1597	0.969202	4	2	3	14.6353	1775.77			137501
1598	14.5897	14.6271	1598	0.913072	4	2;3	3	14.6097	1918.74			82519
1600	14.6361	14.6788	1600	0.913044	4	2	3	14.666	1926.68			148240
1601	14.645	14.7185	1601	0.993601	7	2	3	14.671	1910.71			142001
1602	14.6878	14.753	1602	0.99989	8	1	2	14.7214	218.166			146726
1603	14.6964	14.7352	1603	0.957231	4	4	5	14.7152	2514.13			170549
1604	14.7125	14.753	1604	0.999769	6	1	2	14.7301	238.141			518097
1607	14.7125	14.7441	1607	0.999165	3	1	2	14.7267	327.997			426836
1608	14.7125	14.7441	1608	0.999956	3	1	2	14.727	326			447898
1609	14.7244	14.7441	1609	0.952384	4	2	3	14.7337	1385.59			109361
1610	14.7441	14.8903	1610	0.976655	23	3;4	4	14.8214	2115.9			2091851
1612	14.7622	14.855	1612	0.914812	10	3;2	5	14.817	2099.94			975671
1614	14.7622	14.8637	1614	0.957382	10	3	4	14.822	1912.82			896943
1615	14.753	14.7759	1615	0.997197	3	1	2	14.7645	692.792			156263
1618	14.8816	15.3422	1618	0.993124	42	2	3	15.0714	1815.75			2486278
1619	14.8727	15.1008	1619	0.992721	40	3;2	3	14.9484	1831.71			3580162
1620	14.8993	14.987	1620	0.937138	9	2	3	14.9453	1853.69			676603
1621	14.9082	15.0047	1621	0.940124	7	2	3	14.9528	1869.66			609404
1622	14.9957	15.1833	1622	0.99997	24	1	2	15.0813	238.141			2406778
1623	15.0133	15.1833	1623	0.999946	21	1	2	15.0743	283.199			487407
1624	15.0133	15.1576	1624	0.965792	20	3;2	4	15.0827	2229.93			586412
1625	15.0222	15.1411	1625	0.999241	17	1	2	15.0712	294.157			356980
1626	15.031	15.1523	1626	0.99986	15	1	2	15.0753	260.123			969710
1627	15.0399	15.1923	1627	0.996999	21	1	2	15.1188	234.162			458843
1628	15.0545	15.1923	1628	0.999975	29	1	2	15.1273	282.167			175298
1629	15.0399	15.1833	1629	0.99641	15	1	2	15.1228	227.224			164823
1630	15.0769	15.1262	1630	0.996622	5	2	2	15.103	689.369			161685
1631	15.0769	15.1833	1631	0.999959	8	1	2	15.1252	218.166			127257
1632	15.0823	15.1666	1632	0.999956	10	1	2	15.1233	216.952			88683
1633	15.1008	15.1576	1633	0.99635	5	1	2	15.1316	298.118			268581
1634	15.0876	15.1156	1634	0.95946	5	2	3	15.0995	1093.46			183871
1635	15.0954	15.1666	1635	0.988591	10	1	2	15.1322	390.276			157046
1636	15.0876	15.1833	1636	0.999981	10	1	2	15.1386	327.997			377925
1637	15.1156	15.1833	1637	0.999597	8	1	2	15.153	326			420667
1638	15.1336	15.1666	1638	0.997882	4	1	2	15.1478	329.994			133221
1640	15.1468	15.4729	1640	0.981149	53	2;3	3	15.2444	1831.71			2271484
1641	15.1336	15.1576	1641	0.999637	4	1	2	15.1457	228.136			66526
1642	15.1082	15.1523	1642	0.932963	3	2	3	15.1362	1385.59			52707
1643	15.1008	15.1523	1643	0.999626	3	1	2	15.1204	276.172			57197
1644	15.1336	15.1923	1644	0.999288	5	1	2	15.1651	235.93			116768
1645	15.1576	15.2894	1645	0.947233	14	2;3	3	15.225	1869.66			511382
1646	15.1666	15.2628	1646	0.946578	8	2	3	15.2315	1628.63			538264
1647	15.1666	15.2894	1647	0.984427	11	2	4	15.2302	1853.69			527650
1649	15.2804	15.3915	1649	0.962571	8	3	3	15.3212	2229.93			535792
1651	15.3071	15.3333	1651	0.937404	4	2	3	15.3192	1943.8			207648
1652	15.3159	15.6135	1652	0.983861	76	2;3	4	15.4657	2107.92			1155444
1653	15.2894	15.3751	1653	0.94934	13	3;2	5	15.3279	1959.77			253499
1654	15.3246	15.914	1654	0.998618	115	1	2	15.6279	282.167			201190
1655	15.3333	15.3915	1655	0.998528	7	1	2	15.3602	260.123			159291
1656	15.3527	15.6135	1656	0.998436	34	1	2	15.4798	238.141			510727
1657	15.3691	15.914	1657	0.997938	90	1	2	15.642	234.161			471035
1658	15.3617	15.5743	1658	0.964724	24	3;2	4	15.4301	2236.96			280411
1659	15.3617	15.3841	1659	0.97587	3	3	3	15.3748	2145.87			115976
1660	15.3422	15.914	1660	0.999589	73	1	2	15.639	227.224			195922
1661	15.3527	15.4049	1661	0.999637	6	1	2	15.3851	218.166			143842
1662	15.3975	15.6135	1662	0.999643	18	1	2	15.4984	216.952			84168
1663	15.4182	15.5743	1663	0.99986	15	1	2	15.5024	276.918			63521
1664	15.4108	15.6135	1664	0.999702	21	1	2	15.5187	326			433438
1665	15.4108	15.6046	1665	0.999986	27	1	2	15.5094	327.997			432659
1666	15.4049	15.5938	1666	0.999812	25	1	2	15.497	390.276			169260
1667	15.4108	15.4676	1667	0.996825	5	1	2	15.4412	329.994			139515
1668	15.3975	15.4676	1668	1	6	1	2	15.4323	283.199			68027
1669	15.4182	15.6135	1669	0.99947	15	1	2	15.5018	298.118			264414
1670	15.4516	15.5073	1670	0.987858	7	2	3	15.4734	1093.46			100564
1671	15.4569	15.5578	1671	0.937718	10	2;3	5	15.5081	2145.87			153878
1672	15.4835	15.5526	1672	0.975398	9	2	3	15.519	1904.84			102825
1673	15.4909	15.5473	1673	0.999895	4	1	2	15.5171	218.166			128750
1674	15.4623	15.5683	1674	0.997417	7	1	2	15.5202	228.136			59588
1676	15.563	15.6135	1676	0.999754	4	1	2	15.5824	276.172			68469
1678	15.5849	15.6314	1678	0.999994	3	1	2	15.6107	218.166			134967
1679	15.5938	15.7403	1679	0.967161	28	3;2	4	15.6661	1902.75			397272
1680	15.5938	15.6224	1680	0.971673	3	2	3	15.6111	1683.7			98506
1681	15.5849	15.6551	1681	0.963152	10	2;3	3	15.6254	1699.67			127423
1682	15.6046	15.6641	1682	0.951703	4	2	3	15.6278	1458.64			113596
1683	15.6135	15.689	1683	0.984138	6	2	3	15.6551	1886.79			153213
1684	15.6224	15.7403	1684	0.972148	10	3;4	5	15.6698	2737.14			249458
1685	15.6801	15.914	1685	0.999948	24	1	2	15.8049	216.951			92060
1686	15.7108	15.874	1686	0.983048	22	2;3	3	15.7903	1898.75			79112
1687	15.7168	15.9003	1687	0.999453	31	1	2	15.808	326			430684
1688	15.7034	15.914	1688	0.999249	33	1	2	15.8086	327.997			436465
1690	15.6962	15.7242	1690	0.985352	4	1	2	15.7105	218.166			134748
1691	15.7034	15.9003	1691	0.998014	31	1	2	15.8082	238.141			431180
1692	15.7242	15.9003	1692	0.997743	31	1	2	15.8114	390.276			144029
1693	15.7242	15.8128	1693	0.985628	20	3;2	3	15.7601	1850.82			107321
1694	15.7242	15.9003	1694	0.998165	23	1	2	15.8161	276.918			60371
1695	15.7168	15.9003	1695	0.996972	16	1	2	15.8182	329.994			128454
1696	15.7034	15.9003	1696	0.999826	26	1	2	15.8188	298.118			279630
1697	15.7462	15.8128	1697	0.951072	4	3	3	15.7758	2300.97			49855
1698	15.7801	15.9003	1698	0.991182	17	1	2	15.8385	220.146			66854
1699	15.7856	15.835	1699	0.999283	3	1	2	15.8066	218.167			117622
1700	15.7742	15.8237	1700	0.99132	4	1	2	15.8004	278.151			86922
1701	15.8022	15.9003	1701	0.999963	9	1	2	15.8547	228.136			57369
1702	15.8184	15.9003	1702	0.999951	9	1	2	15.8517	276.172			55752
1703	15.829	15.8405	1703	0.977458	3	1	2	15.8351	740.188			42202
1704	15.791	15.8928	1704	0.999857	7	1	2	15.845	298.25			39066
1705	15.8022	15.8405	1705	0.996353	3	1	2	15.818	249.992			22397
1706	15.835	15.8685	1706	0.999976	4	1	2	15.8504	255.255			33262
1707	15.8511	15.8626	1707	0.999999	3	1	2	15.8562	283.199			31856
1708	15.8571	15.874	1708	0.994939	3	1	2	15.8677	281.214			29660
1709	15.8571	15.9474	1709	0.99958	12	2	3	15.9163	1164.5			1085135
1710	15.874	15.9276	1710	0.981868	6	2	3	15.9003	1061.51			172762
1711	15.8794	15.8853	1711	0.923475	3	3;2	4	15.8814	1965.85			33480
1712	15.914	16.4627	1712	0.950221	125	3;2	3	16.035	1902.75			10579472
1713	15.914	16.4627	1713	0.978723	61	2	4	16.0253	1886.78			12576366
1714	15.914	15.9474	1714	0.941716	4	2	3	15.9392	1924.73			705001
1715	15.914	16.0253	1715	0.945396	8	3;2	4	15.9795	2300.97			3414091
1716	15.9385	15.9648	1716	0.929558	3	2	3	15.9578	1908.77			2104410
1717	15.9561	16.0422	1717	0.947621	9	3	6	16.0075	3729.6			10792565
1718	16.068	16.0859	1718	0.921544	3	2	3	16.075	1908.76			1192848
1719	16.1202	16.1545	1719	0.947396	4	2	3	16.1329	1924.73			271457
1720	16.147	16.2795	1720	0.9466	11	2	3	16.1973	1940.7			158046
1721	16.1633	16.193	1721	0.988708	4	2	3	16.173	1293.54			192720
1722	16.1707	16.5227	1722	0.996752	49	1	2	16.3482	282.167			181665
1723	16.1545	16.2924	1723	0.999989	12	1	2	16.2272	218.167			140500
1724	16.1707	16.4956	1724	0.995252	53	1	2	16.3381	234.161			469083
1725	16.2004	16.2548	1725	0.986982	5	2	3	16.2245	1924.73			97815
1726	16.2221	16.2721	1726	0.99979	5	1	2	16.2468	326			442434
1727	16.2221	16.4734	1727	0.998862	29	1	2	16.3631	327.997			454124
1728	16.2147	16.3474	1728	0.982008	28	3;2	5	16.2723	2107.92			428832
1729	16.2147	16.4822	1729	0.999237	39	1	2	16.35	227.224			174925
1730	16.2058	16.4822	1730	0.998838	29	1	2	16.3648	390.276			160593
1731	16.2147	16.287	1731	0.999078	5	1	2	16.2522	298.118			250394
1732	16.24	16.2548	1732	0.999506	3	1	2	16.2471	216.952			60451
1733	16.2924	16.3263	1733	0.951911	8	2;3	4	16.3075	2022.87			99441
1734	16.2662	16.3263	1734	0.999933	3	1	2	16.3003	276.918			61818
1735	16.2983	16.4956	1735	0.999686	19	1	2	16.3812	216.952			88104
1736	16.2983	16.396	1736	0.917633	11	3	4	16.3385	2075.94			153492
1737	16.3157	16.4734	1737	0.997839	22	1	2	16.3978	326			454244
1738	16.3263	16.4627	1738	0.999731	18	1	2	16.4022	298.118			274482
1739	16.3397	16.3905	1739	0.993551	7	2	2	16.3683	456.271			72530
1740	16.3534	16.4552	1740	0.998369	10	1	2	16.4073	329.994			127277
1741	16.3653	16.4734	1741	0.999871	11	1	2	16.419	276.918			59156
1742	16.3593	16.3905	1742	0.999891	4	1	2	16.3727	218.167			127057
1743	16.3397	16.4013	1743	1	5	1	2	16.3704	238.141			285763
1744	16.3787	16.4418	1744	0.999407	5	1	2	16.4088	276.172			65638
1745	16.396	16.4627	1745	0.999074	7	1	2	16.4307	228.136			63498
1746	16.4179	16.4311	1746	0.960763	3	1	2	16.4236	740.186			47305
1747	16.4311	16.4552	1747	0.999992	4	1	2	16.4436	235.931			95345
1748	16.4418	16.4627	1748	0.999876	3	1	2	16.452	238.141			258203
1749	16.4492	16.7828	1749	0.968536	52	3;2	5	16.6168	2308			369632
1751	16.4311	16.4734	1751	0.993245	3	1	2	16.4491	216.097			42415
1752	16.4627	16.6325	1752	0.998909	23	1	2	16.5451	718.3			1687963
1753	16.4627	16.6325	1753	0.988858	23	2	3	16.547	959.326			1235008
1755	16.5641	18.7997	1755	0.999112	474	1	2	17.6316	234.161			477109
1756	16.5727	18.8265	1756	0.999805	573	1	2	17.8537	282.167			702045
1758	16.6038	16.6514	1758	0.997658	4	1	2	16.6253	276.172			54971
1759	16.6038	17.4946	1759	0.999364	154	1	2	17.0273	326			414241
1760	16.5784	16.664	1760	0.998729	8	1	2	16.6232	218.167			122134
1761	16.5856	18.6129	1761	1	322	1	2	17.5592	227.224			190692
1762	16.6098	18.5905	1762	0.998502	300	1	2	17.5286	327.997			459286
1763	16.6153	17.4946	1763	0.998328	116	1	2	17.0326	329.994			131918
1764	16.6206	17.5143	1764	0.999689	133	1	2	17.0429	216.952			87711
1765	16.6153	17.2269	1765	0.998696	83	1	2	16.925	276.918			62279
1766	16.6153	16.7432	1766	0.96743	19	2	3	16.6721	1456.63			145672
1767	16.6265	17.382	1767	0.99971	95	1	2	17.0302	220.146			65643
1768	16.6384	16.7659	1768	0.974746	12	3	4	16.694	2073.93			43581
1769	16.6206	16.8613	1769	0.929794	26	2;3	3	16.7186	1902.75			55242
1770	16.6265	17.5143	1770	0.999068	146	1	2	17.0438	298.118			241658
1771	16.6098	17.4768	1771	0.99461	153	1	2	17.03	390.276			148243
1772	16.6206	17.4516	1772	0.999466	120	1	2	17.0296	238.141			243483
1773	16.6325	16.8799	1773	0.998265	28	1	2	16.7568	740.187			52546
1774	16.6265	16.6695	1774	0.99806	3	1	2	16.6467	281.213			28289
1775	16.6514	16.6695	1775	0.998994	3	1	2	16.6584	298.25			35847
1776	16.664	16.755	1776	0.997274	17	1	2	16.7086	549.216			162889
1777	16.6514	16.9591	1777	0.999775	32	1	2	16.7992	255.255			37147
1778	16.664	17.459	1778	0.99909	91	1	2	17.0494	228.135			64171
1779	16.6812	16.7317	1779	0.984046	10	2	3	16.7048	1293.54			58521
1780	16.6927	16.8095	1780	0.997101	15	1	2	16.7546	276.172			55906
1781	16.6927	16.7317	1781	0.932991	3	2	3	16.7115	1886.78			26584
1782	16.7149	16.8051	1782	0.999554	7	1	2	16.7621	235.931			89350
1783	16.7261	16.9244	1783	0.999831	21	1	2	16.826	326.193			29114
1784	16.7376	16.8006	1784	0.999937	9	1	2	16.7669	216.099			39336
1785	16.755	16.7828	1785	0.992104	3	1	2	16.768	219.174			22112
1786	16.7775	16.7917	1786	0.909299	3	2	3	16.786	1886.78			24271
1787	16.7719	16.8185	1787	0.999985	6	1	2	16.7973	222.005			62552
1788	16.7608	16.8051	1788	0.999917	6	1	2	16.7863	249.992			27784
1789	16.7317	16.8051	1789	0.99933	6	1	2	16.7698	283.287			23344
1790	16.7719	16.8364	1790	0.999415	7	1	2	16.8105	278.151			97483
1791	16.7873	16.8185	1791	0.999965	4	1	2	16.8047	298.25			31671
1792	16.8006	16.8442	1792	0.998919	6	1	2	16.8188	218.166			112082
1793	16.8006	16.9591	1793	0.999929	14	1	2	16.879	281.213			27647
1794	16.814	16.8557	1794	0.914082	4	3	3	16.8255	2073.93			31032
1795	16.8246	16.871	1795	0.999978	4	1	2	16.8458	295.136			111677
1796	16.8185	16.8557	1796	0.999028	3	1	2	16.8358	260.123			42395
1797	16.8095	16.8557	1797	0.907063	3	3	4	16.8294	2586.09			34096
1798	16.8246	16.8933	1798	0.902314	7	3	3	16.862	2002.89			34643
1799	16.8095	16.8442	1799	0.995831	3	1	2	16.8317	226.975			23721
1800	16.8442	16.9546	1800	0.991531	21	1	2	16.8926	600.253			137900
1801	16.8497	16.8933	1801	0.999132	6	1	2	16.8736	276.172			62186
1802	16.8442	17.0392	1802	0.998324	18	1	2	16.9408	216.099			49956
1803	16.8557	16.8978	1803	0.997052	4	1	2	16.8754	219.174			26526
1804	16.8755	17.0034	1804	0.99778	12	1	2	16.9345	278.151			112365
1805	16.8557	16.9022	1805	0.950488	6	3	3	16.8816	1286.63			47547
1806	16.8613	16.9022	1806	0.999992	4	1	2	16.8799	428.08			20624
1807	16.8557	16.9067	1807	0.999973	6	1	2	16.8846	249.992			32855
1808	16.9067	16.9975	1808	0.966872	7	3	5	16.9515	2774.22			71676
1809	16.9067	17.0218	1809	0.99995	8	1	2	16.9645	295.136			112895
1810	16.9126	17.1661	1810	0.993709	27	1	2	17.0512	740.186			50155
1811	16.9185	17.0499	1811	0.999998	10	1	2	16.9844	298.25			35038
1812	16.9185	16.9437	1812	0.979591	3	3	3	16.9304	2073.93			41229
1813	16.9378	17.0765	1813	0.976958	24	2	3	16.9951	1164.5			309905
1814	16.9378	16.9635	1814	0.997772	5	1	2	16.9526	276.172			61969
1815	16.968	17.1122	1815	0.99047	22	1	2	17.0333	630.263			236839
1816	16.992	17.0765	1816	0.999996	9	1	2	17.0445	276.172			48123
1817	16.9975	17.0277	1817	0.926072	4	4	5	17.0096	3437.52			57153
1818	16.992	17.367	1818	0.999894	36	1	2	17.178	255.255			34901
1819	16.9591	17.0337	1819	0.992812	5	1	2	16.9922	326.193			21778
1820	17.0112	17.0879	1820	0.999654	8	1	2	17.0559	281.213			27226
1822	17.0218	17.0956	1822	0.961729	9	2;3	3	17.0603	1878.82			56804
1823	17.0392	17.1394	1823	0.945332	14	2;3	4	17.0825	1892.8			65266
1825	17.0112	17.3397	1825	0.919046	43	2	3	17.175	1789.73			66392
1826	17.0112	17.0552	1826	0.998891	3	1	2	17.0362	218.166			122564
1828	17.0712	17.3455	1828	0.999957	30	1	2	17.2147	216.099			43522
1829	17.0277	17.2447	1829	0.970785	18	3	4	17.1564	2073.93			39350
1830	17.0879	17.1941	1830	0.998845	11	1	2	17.1438	278.151			103230
1831	17.124	17.1438	1831	0.9994	4	1	2	17.1344	283.287			20232
1832	17.1349	17.3174	1832	0.999913	17	1	2	17.2251	281.213			25129
1833	17.1483	17.1808	1833	0.997061	4	1	2	17.1618	260.123			51223
1834	17.1296	17.175	1834	0.998382	4	1	2	17.1542	276.172			58602
1835	17.1528	17.2916	1835	0.999014	11	1	2	17.2197	326.193			32190
1836	17.1572	17.175	1836	0.997787	5	1	2	17.1662	218.166			104167
1838	17.1438	17.2916	1838	0.999722	11	1	2	17.2159	298.25			34445
1839	17.1808	17.2056	1839	0.91341	4	3	5	17.195	2716.17			39603
1840	17.2115	17.2314	1840	0.999796	4	1	2	17.2218	218.166			112429
1841	17.2115	17.4119	1841	0.961558	20	1	2	17.3074	740.187			54842
1842	17.2224	17.2403	1842	0.995515	3	1	2	17.2333	219.174			23618
1843	17.2269	17.382	1843	0.999714	14	1	2	17.2983	278.151			109728
1844	17.2171	17.2581	1844	0.998731	4	1	2	17.2387	260.123			36664
1845	17.2269	17.2358	1845	0.997149	3	1	2	17.2314	295.136			114532
1847	17.2447	17.2801	1847	0.9998	4	1	2	17.2573	235.931			82204
1848	17.2171	17.2639	1848	0.998163	4	1	2	17.239	276.172			47295
1849	17.2403	17.3174	1849	0.976616	13	2;3	3	17.2731	1917.83			45320
1850	17.2358	17.3594	1850	0.999993	9	1	2	17.2922	249.992			33406
1851	17.2581	17.3084	1851	0.991097	5	1	2	17.2832	283.286			19413
1852	17.2683	17.3084	1852	0.999439	4	1	2	17.2847	219.174			25200
1853	17.2742	17.4768	1853	0.99938	29	1	2	17.3628	276.918			57315
1854	17.2742	17.3397	1854	0.997943	4	1	2	17.3017	742.184			22963
1855	17.3084	17.3344	1855	0.925087	3	5	3	17.3187	1089.83			107587
1856	17.3084	17.3505	1856	0.998717	4	1	2	17.3292	276.172			50507
1857	17.3084	17.3505	1857	0.997797	5	1	2	17.3283	260.123			57663
1858	17.3235	17.3895	1858	0.99926	6	1	2	17.3601	326.193			34342
1859	17.3344	17.4857	1859	0.984026	28	3;4	5	17.4088	2845.25			565615
1860	17.329	17.5471	1860	0.922913	27	3	4	17.4653	2073.93			246915
1861	17.3505	17.4119	1861	0.986534	6	1	2	17.3784	281.213			27649
1863	17.3594	17.3895	1863	0.999827	4	1	2	17.373	298.25			36480
1864	17.3455	17.4063	1864	0.999994	4	1	2	17.3779	218.166			114861
1865	17.382	17.4303	1865	0.9697	6	2	3	17.4036	1789.73			47539
1866	17.3895	17.4063	1866	0.933896	3	3	4	17.3976	2883.2			68276
1870	17.459	17.7491	1870	0.979679	38	2	3	17.5685	1364.58			637849
1871	17.4768	17.5767	1871	0.999761	5	1	2	17.5183	218.166			153566
1872	17.4857	17.5856	1872	0.912388	18	4;3	6	17.5355	3039.3			282205
1873	17.4946	17.5767	1873	0.922659	5	3	5	17.542	3023.32			125302
1874	17.5559	18.5589	1874	0.999141	129	1	2	18.0071	326			450716
1875	17.5619	17.9297	1875	0.999881	34	1	2	17.7502	329.994			131651
1876	17.5619	17.6039	1876	0.909548	5	3;2	4	17.5708	1862.78			159970
1877	17.5767	17.6728	1877	0.999978	10	1	2	17.6195	228.136			54522
1878	17.5856	17.894	1878	0.999841	30	1	2	17.7297	276.918			54559
1879	17.5856	17.9151	1879	0.999178	44	1	2	17.7473	298.118			247214
1880	17.5471	18.499	1880	0.999508	127	1	2	18.0096	390.275			184873
1881	17.5767	18.2617	1881	0.999509	69	1	2	17.9138	216.952			79664
1882	17.5987	17.9151	1882	0.964844	29	2	3	17.7629	1789.74			54023
1883	17.5931	17.9151	1883	0.999301	25	1	2	17.7454	238.141			268587
1884	17.6128	17.7262	1884	0.999442	12	1	2	17.6675	218.167			128794
1885	17.6393	17.6622	1885	0.999438	3	1	2	17.6501	220.146			60995
1886	17.6448	17.6622	1886	0.916172	3	3	5	17.6538	2902.24			68147
1887	17.6507	17.6805	1887	0.999958	3	1	2	17.6673	235.931			74772
1890	17.6566	18.7907	1890	0.979781	184	2;3	3	18.2197	1860.77			282904
1891	17.6448	17.8576	1891	0.977636	19	1	2	17.764	740.187			64970
1892	17.6805	17.7376	1892	0.999919	3	1	2	17.7068	216.1			38464
1893	17.7203	17.9686	1893	0.998212	22	1	2	17.8348	228.135			63235
1894	17.7203	17.8576	1894	0.999433	13	1	2	17.7941	220.146			58017
1896	17.7262	17.8379	1896	0.999572	7	1	2	17.7771	276.172			57958
1898	17.7491	17.8151	1898	0.931772	11	2;3	4	17.7847	2139.9			70814
1899	17.7436	17.7817	1899	0.999894	3	1	2	17.7614	235.931			75435
1900	17.7764	17.7871	1900	0.990624	4	1	2	17.7827	216.099			27097
1901	17.7764	17.8206	1901	0.99944	5	1	2	17.8005	281.214			30323
1902	17.7924	17.9151	1902	0.985072	32	2;3	4	17.8499	1830.8			139884
1903	17.8206	17.862	1903	0.999133	4	1	2	17.84	326.193			28178
1904	17.8265	17.862	1904	0.965674	8	2	3	17.8455	1627.72			58984
1906	17.8436	17.8681	1906	0.999363	3	1	2	17.8533	216.099			38371
1907	17.894	18.0053	1907	0.909906	14	3	5	17.9448	2755.1			286750
1908	17.894	17.9239	1908	0.999999	3	1	2	17.9071	218.166			109657
1909	17.9151	17.982	1909	0.980607	7	3	5	17.9434	2739.14			151065
1910	17.9151	17.982	1910	0.953767	5	2	3	17.9441	1898.72			55286
1911	17.9567	18.2617	1911	0.939047	44	2;3	3	18.084	1789.73			156927
1912	17.9761	18.0809	1912	0.996542	8	1	2	18.0197	329.994			131742
1914	17.988	18.0267	1914	0.999168	4	1	2	18.0026	276.918			62204
1915	17.9627	18.0585	1915	0.999998	7	1	2	18.0078	298.118			247271
1916	17.988	18.016	1916	0.999325	3	1	2	17.9974	276.172			57986
1917	18.0267	18.1509	1917	0.948176	28	2;3	3	18.0995	1830.8			134051
1918	18.0053	18.1243	1918	0.999981	9	1	2	18.08	228.136			59941
1919	18.0629	18.1135	1919	0.998945	4	1	2	18.0925	238.141			230259
1921	18.0942	18.5204	1921	0.996729	46	1	2	18.2685	298.118			263169
1922	18.0942	18.1243	1922	0.999989	4	1	2	18.1064	218.167			123458
1923	18.1001	18.1296	1923	0.976952	4	2	3	18.1137	1627.72			51819
1924	18.1135	18.2723	1924	0.939763	26	3;4	5	18.1728	3031.32			164522
1925	18.1296	18.3313	1925	0.99633	21	1	2	18.235	329.994			128454
1926	18.1296	18.1864	1926	0.999999	5	1	2	18.1519	276.918			43612
1927	18.1135	18.1349	1927	0.999385	3	1	2	18.1256	216.1			35765
1928	18.1189	18.1455	1928	0.980652	4	1	2	18.1324	740.185			55105
1929	18.1509	18.168	1929	0.949698	3	3	3	18.1581	1972.87			43008
1930	18.1562	18.3147	1930	0.999914	13	1	2	18.2255	238.141			241845
1931	18.1509	18.1978	1931	0.972478	3	3	3	18.1693	2016.86			37156
1933	18.1562	18.1978	1933	0.999997	3	1	2	18.1827	220.146			56842
1934	18.1923	18.2723	1934	0.988401	7	1	2	18.2323	740.186			53612
1935	18.168	18.2138	1935	1	4	1	2	18.1965	218.167			125288
1937	18.2032	18.3403	1937	0.999998	11	1	2	18.2579	228.136			62939
1938	18.2244	18.295	1938	0.999989	6	1	2	18.2552	486.21			107698
1939	18.2412	18.3403	1939	0.998754	8	1	2	18.2849	276.918			56896
1940	18.2412	18.2782	1940	0.997047	3	2	3	18.2555	1887.78			41116
1941	18.2465	18.3094	1941	0.999824	4	1	2	18.27	235.931			89252
1942	18.2524	18.5323	1942	0.999961	30	1	2	18.4182	299.194			330614
1943	18.2617	18.2782	1943	0.989664	3	1	2	18.271	278.151			110320
1945	18.2896	18.3262	1945	0.996331	4	1	2	18.3116	620.59			65647
1946	18.3094	18.3313	1946	0.937036	3	1	2	18.3233	740.185			61768
1947	18.3039	18.3584	1947	0.999961	7	1	2	18.333	216.951			65634
1948	18.2896	18.3094	1948	0.999902	3	1	2	18.2978	281.214			27701
1949	18.3039	18.3207	1949	0.983383	3	3	5	18.3152	2755.11			158935
1950	18.3147	18.4014	1950	0.95355	6	3	5	18.3549	2739.14			157714
1951	18.3207	18.3772	1951	0.932617	5	3	5	18.3459	2777.08			66876
1952	18.3262	18.3584	1952	0.999538	3	1	2	18.3392	216.099			46293
1953	18.3643	18.427	1953	0.971894	6	3	5	18.3876	2755.1			208844
1955	18.3959	18.4073	1955	0.999787	3	1	2	18.4016	228.135			51920
1956	18.4014	18.4327	1956	0.909042	3	5	3	18.4206	1089.83			105296
1957	18.4073	18.499	1957	0.999852	8	1	2	18.4516	216.952			86094
1958	18.4014	18.4627	1958	0.998888	5	1	2	18.4364	329.994			124453
1959	18.4073	18.4539	1959	0.999946	3	1	2	18.4303	276.918			39167
1960	18.4465	18.5589	1960	0.998666	15	2	2	18.5024	642.38			495662
1961	18.4465	18.493	1961	0.99987	4	1	2	18.468	218.167			122213
1962	18.4627	18.8086	1962	0.996582	76	2;3	4	18.6406	1901.83			759058
1963	18.4788	18.5589	1963	0.992508	8	2	4	18.5315	1698.75			155673
1964	18.493	18.6514	1964	0.999063	19	1	2	18.5823	489.242			1195242
1965	18.499	18.5589	1965	0.916338	5	3	4	18.5315	1939.78			92938
1966	18.5411	18.6129	1966	0.944267	7	4;3	5	18.591	3224.37			288202
1970	18.6218	18.6893	1970	0.920883	6	3	3	18.6508	2095.88			142613
1971	18.6455	18.7205	1971	0.999932	6	1	2	18.6802	218.166			134088
1972	18.6589	18.7997	1972	0.999768	13	1	2	18.7272	227.224			169977
1974	18.6514	18.8176	1974	0.999502	18	1	2	18.745	299.194			716907
1975	18.6455	18.7907	1975	0.999442	12	1	2	18.7349	327.997			445044
1976	18.6893	18.7817	1976	0.952051	11	2	3	18.7396	1698.75			172981
1977	18.728	18.7817	1977	0.999523	7	1	2	18.7563	326			467196
1978	18.728	18.7521	1978	0.9737	4	3	3	18.7367	1939.78			137121
1979	18.728	18.7817	1979	0.999626	7	1	2	18.7554	327.225			80935
1980	18.7057	18.7907	1980	0.999926	5	1	2	18.7484	216.952			75536
1981	18.7653	18.7997	1981	0.976969	3	2	4	18.7857	1861.78			166640
1982	18.7907	18.9056	1982	0.967807	6	3	4	18.8409	2848.12			572976
1983	18.7743	18.9146	1983	0.990697	18	3;4	5	18.8518	2826.14			1852050
1984	18.7743	18.8086	1984	0.997227	3	1	2	18.7932	218.166			134025
1986	18.7817	18.9414	1986	0.997361	15	3;2	5	18.8577	2810.17			1261678
1987	18.8086	18.8618	1987	0.919616	3	3	5	18.8428	2864.08			491461
1988	18.8879	19.0043	1988	0.909192	8	2	3	18.9373	1861.77			699378
1989	18.8879	18.9914	1989	0.972879	11	3	4	18.9408	1860.77			408270
1990	18.9325	20.5232	1990	0.998183	425	1	2	19.7117	282.167			434243
1992	19.0096	19.5085	1992	0.995196	107	1	2	19.2439	234.162			557850
1993	19.0216	20.4956	1993	0.998062	227	1	2	19.772	227.224			176466
1995	19.0478	19.3892	1995	0.999802	36	1	2	19.2213	216.952			89684
[truncated: 1,377 more rows]

## Sheet: WT2
RAW OUTPUT (WT2 SAMPLE)														CONSOLIDATED DATA
ID	xicStart	xicEnd	feature	corrMax	ionCount	chargeOrder	maxIsotopeCount	rt	mwMonoisotopic	theo_mwMonoisotopic	inferredStructure	maxIntensity		Structure	Intensity	RT	Abundance	Obs	Theo	Dppm	Oligomerisation state
300	3.82427	4.08564	300	0.999981	39	1	2	3.93539	478.179	478.1799	GM (Anhydro) |0	468486		GM|0	14948649	3.62107	0.0246142	498.205	498.206	2.20028	0
466	5.38412	5.66478	466	0.998798	37	1	2	5.49593	478.179	478.1799	GM (Anhydro) |0	756855		GM (x2)|0,GM-GM|0	5689163	10.116	0.00936767	976.383	976.386	2.79171	0
82	2.22642	2.28756	82	0.994192	8	1	2	2.26011	456.194	456.1956	GM (Deacetyl) |0	314084		GM (Anhydro) |0	1225341	5.49593	0.00201762	478.179	478.18	1.94004	0
110	2.49844	2.64284	110	0.999115	24	1	2	2.5753	456.194	456.1956	GM (Deacetyl) |0	339733		GM (Deacetyl) |0	653817	2.5753	0.00107656	456.194	456.196	3.73654	0
568	6.76927	6.99834	568	0.994274	38	2	3	6.86616	934.373	934.3755000000001	GM (x2) (Deacetyl) |0	459324		GM (x2) (Deacetyl) |0	459324	6.86616	0.000756314	934.373	934.375	3.1111	0
981	10.0675	10.2342	981	0.95362	17	2;1	3	10.116	976.383	976.3860000000001,976.386	GM (x2)|0,GM-GM|0	5689163		GM-AEJA|1	227830622	10.0598	0.375142	941.405	941.408	3.12448	1
1807	17.4138	17.4989	1807	0.998654	12	1	2	17.4557	678.258	678.2596	GM-AE (Anhydro) |1	482915		GM-AEJ|1	87974742	6.5692	0.144858	870.368	870.371	2.54876	1
1455	13.9011	14.1103	1455	1	54	1;2	2	13.9852	850.343	850.3444	GM-AEJ (Anhydro) |1	3994869		GM-AEJKR|1	46450569	9.5819	0.0764846	1154.56	1154.57	3.5141	1
990	10.1986	10.314	990	0.980005	10	2	3	10.2485	850.341	850.3444	GM-AEJ (Anhydro) |1	411309		GM-AE|1	10932398	9.59417	0.0180011	698.283	698.286	3.30092	1
743	8.21105	8.29386	743	0.993091	11	2	3	8.25581	850.341	850.3444	GM-AEJ (Anhydro) |1	192500		GM-AEJ (Anhydro) |1	4598678	13.9852	0.0075721	850.343	850.344	2.14378	1
393	4.70225	4.88431	393	0.982877	23	2	2	4.77276	828.358	828.3601	GM-AEJ (Deacetyl) |1	112523		GM-AEJA (Anhydro) |1	4296720	16.5593	0.0070749	921.379	921.381	2.2333	1
1907	18.6035	18.9339	1907	0.933904	37	2	3	18.7898	1702.7	1702.7042	GM-AEJ-GM-AEJ (Anhydro) |2	840801		GM-AEJG|1	4113985	7.87783	0.00677401	927.39	927.392	2.23525	1
1969	19.3392	20.0657	1969	0.990497	182	2;3	3	19.6531	1773.74	1773.7413,1773.7413	GM-AEJ-GM-AEJA (Anhydro) |2,GM-AEJA-GM-AEJ (Anhydro) |2	2083631		GM-AEJGA|1	1303144	9.47418	0.00214573	998.426	998.429	3.08395	1
1575	14.8831	15.5806	1575	0.99842	163	3;2	3	15.1141	1793.76	1793.7675,1793.7675	GM-AEJ-GM-AEJA|2,GM-AEJA-GM-AEJ|2	12942193		GM-AEJKR (Anhydro) |1	1175682	14.8488	0.00193586	1134.54	1134.54	3.3083	1
1567	14.7648	14.8041	1567	0.96803	10	3;2	3	14.7844	1793.76	1793.7675,1793.7675	GM-AEJ-GM-AEJA|2,GM-AEJA-GM-AEJ|2	2530630		GM-GM-AEJA|1	795910	13.1008	0.00131053	1419.58	1419.59	2.82364	1
1536	14.5349	14.605	1536	0.944206	17	3;2	3	14.568	1793.76	1793.7675,1793.7675	GM-AEJ-GM-AEJA|2,GM-AEJA-GM-AEJ|2	3038226		M-AEJKR|1	723732	8.2217	0.00119168	951.484	951.487	3.54239	1
1488	14.1163	14.3948	1488	0.985066	60	2;3	3	14.2289	1722.73	1722.7304	GM-AEJ-GM-AEJ|2	3167719		GM-AE (Anhydro) |1	482915	17.4557	0.000795159	678.258	678.26	2.83498	1
1716	16.4698	16.6695	1716	0.999417	46	2;1	2	16.5593	921.379	921.3815	GM-AEJA (Anhydro) |1	2870840		GM-GM-AEJ|1	468923	11.3422	0.00077212	1348.55	1348.55	2.88881	1
1226	11.9238	12.2468	1226	0.988585	26	2	3	12.0998	921.38	921.3815	GM-AEJA (Anhydro) |1	152937		M-AEJA|1	452203	8.54113	0.000744589	738.326	738.328	3.71511	1
1219	11.875	11.8928	1219	0.997955	3	2	3	11.8833	921.379	921.3815	GM-AEJA (Anhydro) |1	83744		GM-AEJAA|1	342663	11.4075	0.000564222	1012.44	1012.44	2.11229	1
1202	11.7836	11.8359	1202	0.922866	4	2	3	11.7989	921.379	921.3815	GM-AEJA (Anhydro) |1	64018		GM-AEJA (Deacetyl) |1	315183	8.59433	0.000518974	899.394	899.397	3.06467	1
1106	10.9914	11.1005	1106	0.987787	11	2	3	11.0517	921.379	921.3815	GM-AEJA (Anhydro) |1	70942		M-AEJ|1	149430	4.57086	0.000246049	667.289	667.291	3.30145	1
1249	12.277	12.4453	1249	0.999081	19	2	3	12.3778	921.379	921.3815	GM-AEJA (Anhydro) |1	861230		GM-AEJ (Deacetyl) |1	112523	4.77276	0.000185278	828.358	828.36	2.67566	1
1064	10.786	10.8767	1064	0.983122	8	2	2	10.8144	921.379	921.3815	GM-AEJA (Anhydro) |1	193009		GM-GM-AEJKR|1	73923	12.2157	0.00012172	1632.74	1632.75	3.53094	1
778	8.48846	8.67545	778	0.992544	32	2	3	8.59433	899.394	899.3972	GM-AEJA (Deacetyl) |1	315183		GM-AEJA-GM-AEJA|2,GM-AEJAA-GM-AEJ|2	103997351	16.0237	0.17124	1864.8	1864.8	1.99659	2
2154	21.1349	21.2514	2154	0.955615	13	3	4	21.1826	2626.1	2626.1011,2626.1011	GM-AEJA-GM-AEJ-GM-AEJ (Anhydro) |3,GM-AEJ-GM-AEJ-GM-AEJA (Anhydro) |3	66630		GM-AEJKR-GM-AEJA|2	26815148	14.8566	0.0441533	2077.96	2077.96	3.26909	2
2148	21.0444	21.0986	2148	0.938711	5	3	3	21.0787	2626.1	2626.1011,2626.1011	GM-AEJA-GM-AEJ-GM-AEJ (Anhydro) |3,GM-AEJ-GM-AEJ-GM-AEJA (Anhydro) |3	59464		GM-AEJ-GM-AEJA|2,GM-AEJA-GM-AEJ|2	18511049	15.1141	0.0304799	1793.76	1793.77	2.4892	2
2220	21.6281	21.6429	2220	0.969372	3	3	5	21.6363	2626.1	2626.1011,2626.1011	GM-AEJA-GM-AEJ-GM-AEJ (Anhydro) |3,GM-AEJ-GM-AEJ-GM-AEJA (Anhydro) |3	36004		GM-AEJA-GM-AEJA (Anhydro) |2,GM-AEJAA-GM-AEJ (Anhydro) |2	5472178	20.5619	0.00901039	1844.77	1844.78	2.37357	2
1809	17.4138	17.4899	1809	0.966463	8	3	5	17.4611	2646.12	2646.1273,2646.1273	GM-AEJA-GM-AEJ-GM-AEJ|3,GM-AEJ-GM-AEJ-GM-AEJA|3	155367		GM-AEJKR-GM-AEJ|2	4859890	14.2198	0.0080022	2006.92	2006.93	3.35906	2
1713	16.4251	16.5158	1713	0.983518	5	3	3	16.4793	1844.77	1844.7784,1844.7784	GM-AEJA-GM-AEJA (Anhydro) |2,GM-AEJAA-GM-AEJ (Anhydro) |2	126699		GM-AEJKR-GM-AEJA (Anhydro) |2	3887917	19.0113	0.00640177	2057.93	2057.94	1.45435	2
1735	16.6588	16.7852	1735	0.902503	10	3	4	16.7208	1844.77	1844.7784,1844.7784	GM-AEJA-GM-AEJA (Anhydro) |2,GM-AEJAA-GM-AEJ (Anhydro) |2	51639		GM-AEJ-GM-AEJ|2	3167719	14.2289	0.00521591	1722.73	1722.73	2.88072	2
1803	17.2516	17.6582	1803	0.913468	29	3	3	17.5147	1844.77	1844.7784,1844.7784	GM-AEJA-GM-AEJA (Anhydro) |2,GM-AEJAA-GM-AEJ (Anhydro) |2	297783		GM-AEJG-GM-AEJA|2,GM-AEJGA-GM-AEJ|2	2351965	14.6937	0.0038727	1850.78	1850.79	2.23501	2
2085	20.3944	20.8921	2085	0.995992	122	2;3	3	20.5619	1844.77	1844.7784,1844.7784	GM-AEJA-GM-AEJA (Anhydro) |2,GM-AEJAA-GM-AEJ (Anhydro) |2	4821599		GM-AEJ-GM-AEJA (Anhydro) |2,GM-AEJA-GM-AEJ (Anhydro) |2	2083631	19.6531	0.00343087	1773.74	1773.74	2.19863	2
1792	17.1496	17.1759	1792	0.925912	5	3	4	17.1613	1844.78	1844.7784,1844.7784	GM-AEJA-GM-AEJA (Anhydro) |2,GM-AEJAA-GM-AEJ (Anhydro) |2	44373		GM-AEJGA-GM-AEJA|2	1122571	15.3548	0.0018484	1921.82	1921.83	2.13603	2
1750	16.8147	17.041	1750	0.930243	23	3	4	16.944	1844.77	1844.7784,1844.7784	GM-AEJA-GM-AEJA (Anhydro) |2,GM-AEJAA-GM-AEJ (Anhydro) |2	45841		GM-AEJKR-GM-AEJ (Anhydro) |2	1062173	18.0941	0.00174895	1986.9	1986.9	2.58622	2
2047	20.0775	20.1904	2047	0.983466	24	2;3	3	20.1436	1844.78	1844.7784,1844.7784	GM-AEJA-GM-AEJA (Anhydro) |2,GM-AEJAA-GM-AEJ (Anhydro) |2	84244		GM-AEJ-GM-AEJ (Anhydro) |2	840801	18.7898	0.00138445	1702.7	1702.7	5.30693	2
1602	15.1568	15.1849	1602	0.939649	6	2;3	4	15.1748	1822.79	1822.7941,1822.7941	GM-AEJA-GM-AEJA (Deacetyl) |2,GM-AEJAA-GM-AEJ (Deacetyl) |2	87686		GM-GM-AEJA-GM-AEJA|2,GM-GM-AEJAA-GM-AEJ|2	522343	17.5196	0.00086008	2342.98	2342.98	2.94926	2
1644	15.5806	16.4251	1644	0.987779	202	3;2	3	16.0237	1864.8	1864.8046,1864.8046	GM-AEJA-GM-AEJA|2,GM-AEJAA-GM-AEJ|2	103950060		GM-AEJAA-GM-AEJA|2	440573	16.5504	0.000725439	1935.84	1935.84	2.91207	2
1840	17.7313	17.7722	1840	0.999397	4	2	3	17.7549	1864.8	1864.8046,1864.8046	GM-AEJA-GM-AEJA|2,GM-AEJAA-GM-AEJ|2	47291		GM-AEJG-GM-AEJ|2	313857	13.906	0.000516791	1779.75	1779.75	2.39807	2
2258	21.9363	22.1353	2258	0.932111	29	3;2	5	22.0237	2697.13	2697.1382,2697.1382,2697.1382	GM-AEJAA-GM-AEJ-GM-AEJ (Anhydro) |3,GM-AEJA-GM-AEJ-GM-AEJA (Anhydro) |3,GM-AEJ-GM-AEJA-GM-AEJA (Anhydro) |3	268427		GM-AEJG-GM-AEJA (Anhydro) |2,GM-AEJGA-GM-AEJ (Anhydro) |2	126144	19.1178	0.000207706	1830.76	1830.76	1.75068	2
2180	21.333	21.7642	2180	0.99181	68	3;2	5	21.5789	2697.13	2697.1382,2697.1382,2697.1382	GM-AEJAA-GM-AEJ-GM-AEJ (Anhydro) |3,GM-AEJA-GM-AEJ-GM-AEJA (Anhydro) |3,GM-AEJ-GM-AEJA-GM-AEJA (Anhydro) |3	333198		GM-AEJGA-GM-AEJA (Anhydro) |2	118403	19.7187	0.00019496	1901.8	1901.8	2.18225	2
2237	21.8148	21.8503	2237	0.981412	5	3	4	21.829	2697.14	2697.1382,2697.1382,2697.1382	GM-AEJAA-GM-AEJ-GM-AEJ (Anhydro) |3,GM-AEJA-GM-AEJ-GM-AEJA (Anhydro) |3,GM-AEJ-GM-AEJA-GM-AEJA (Anhydro) |3	84035		M-AEJKR-GM-AEJA|2	104393	14.1757	0.000171892	1874.88	1874.88	3.82617	2
2285	22.1853	22.6145	2285	0.932058	91	3;2	5	22.3887	2768.17	2768.1753,2768.1753	GM-AEJAA-GM-AEJ-GM-AEJA (Anhydro) |3,GM-AEJA-GM-AEJA-GM-AEJA (Anhydro) |3	1132610		GM-AEJA-GM-AEJA (Deacetyl) |2,GM-AEJAA-GM-AEJ (Deacetyl) |2	87686	15.1748	0.000144382	1822.79	1822.79	1.24519	2
1910	18.6947	18.721	1910	0.905979	4	3	3	18.7061	2788.2	2788.2015,2788.2015	GM-AEJAA-GM-AEJ-GM-AEJA|3,GM-AEJA-GM-AEJA-GM-AEJA|3	214372		GM-AEJAA-GM-AEJA (Anhydro) |2	86431	21.1786	0.000142316	1915.81	1915.82	1.57978	2
1918	18.7917	18.9429	1918	0.975216	39	2;3;4	5	18.8685	2788.19	2788.2015,2788.2015	GM-AEJAA-GM-AEJ-GM-AEJA|3,GM-AEJA-GM-AEJA-GM-AEJA|3	9177796		GM-GM-AEJ-GM-AEJA|2,GM-GM-AEJA-GM-AEJ|2	51277	16.8499	8.44317e-05	2271.94	2271.95	2.1322	2
1885	18.3088	18.4946	1885	0.964499	28	3;2	5	18.3939	2717.16	2717.1644,2717.1644,2717.1644	GM-AEJAA-GM-AEJ-GM-AEJ|3,GM-AEJA-GM-AEJ-GM-AEJA|3,GM-AEJ-GM-AEJA-GM-AEJA|3	1145604		GM-AEJAA-GM-AEJ-GM-AEJA|3,GM-AEJA-GM-AEJA-GM-AEJA|3	9392168	18.8685	0.015465	2788.19	2788.2	3.75515	3
1857	17.9079	18.0698	1857	0.949919	28	3;2	5	17.9666	2717.16	2717.1644,2717.1644,2717.1644	GM-AEJAA-GM-AEJ-GM-AEJ|3,GM-AEJA-GM-AEJ-GM-AEJA|3,GM-AEJ-GM-AEJA-GM-AEJA|3	1024086		GM-AEJAA-GM-AEJ-GM-AEJ|3,GM-AEJA-GM-AEJ-GM-AEJA|3,GM-AEJ-GM-AEJA-GM-AEJA|3	2169690	18.3939	0.00357257	2717.16	2717.16	2.01483	3
2156	21.1251	21.2281	2156	0.992994	21	2;3	3	21.1786	1915.81	1915.8155	GM-AEJAA-GM-AEJA (Anhydro) |2	53103		GM-AEJAA-GM-AEJ-GM-AEJA (Anhydro) |3,GM-AEJA-GM-AEJA-GM-AEJA (Anhydro) |3	1132610	22.3887	0.00186493	2768.17	2768.18	2.07881	3
2125	20.8747	20.9089	2125	0.946561	5	2	3	20.8916	1915.82	1915.8155	GM-AEJAA-GM-AEJA (Anhydro) |2	33328		GM-AEJKR-GM-AEJA-GM-AEJA|3	1123955	17.5567	0.00185068	3001.35	3001.36	2.40623	3
1952	19.2011	19.2447	1952	0.94609	3	3	5	19.2213	2859.23	2859.2386	GM-AEJAA-GM-AEJA-GM-AEJA|3	66403		GM-AEJAA-GM-AEJ-GM-AEJ (Anhydro) |3,GM-AEJA-GM-AEJ-GM-AEJA (Anhydro) |3,GM-AEJ-GM-AEJA-GM-AEJA (Anhydro) |3	685660	21.5789	0.00112899	2697.13	2697.14	1.5034	3
1717	16.4817	16.6348	1717	0.957864	29	3;2	4	16.5504	1935.84	1935.8417	GM-AEJAA-GM-AEJA|2	440573		GM-AEJKR-GM-AEJA-GM-AEJA (Anhydro) |3	306241	21.008	0.000504251	2981.33	2981.33	2.24882	3
1183	11.5574	11.5984	1183	0.972502	3	2	3	11.5731	1012.44	1012.4448	GM-AEJAA|1	58683		GM-AEJGA-GM-AEJ-GM-AEJA|3,GM-AEJG-GM-AEJA-GM-AEJA|3	208093	17.7397	0.000342642	2774.18	2774.19	1.077	3
1142	11.3548	11.4639	1142	0.996775	17	2;1	3	11.4075	1012.44	1012.4448	GM-AEJAA|1	283980		GM-AEJA-GM-AEJ-GM-AEJ (Anhydro) |3,GM-AEJ-GM-AEJ-GM-AEJA (Anhydro) |3	162098	21.1826	0.000266908	2626.1	2626.1	1.59413	3
873	9.14765	9.40814	873	0.997146	41	2	3	9.25885	941.405	941.4077	GM-AEJA|1	4231498		GM-AEJA-GM-AEJ-GM-AEJ|3,GM-AEJ-GM-AEJ-GM-AEJA|3	155367	17.4611	0.000255824	2646.12	2646.13	1.14983	3
1311	12.8004	12.8462	1311	0.990787	5	2	2	12.8273	941.405	941.4077	GM-AEJA|1	41764		GM-AEJKR-GM-AEJ-GM-AEJA|3	145544	17.1147	0.00023965	2930.31	2930.32	3.44218	3
974	9.91618	10.6611	974	0.998198	165	2;1	3	10.0598	941.405	941.4077	GM-AEJA|1	223557360		GM-AEJGA-GM-AEJA-GM-AEJA|3	128442	18.2603	0.00021149	2845.22	2845.22	1.90489	3
1934	19.0202	19.25	1934	0.937786	38	2;3	3	19.1178	1830.76	1830.7627,1830.7628	GM-AEJG-GM-AEJA (Anhydro) |2,GM-AEJGA-GM-AEJ (Anhydro) |2	126144		GM-AEJAA-GM-AEJA-GM-AEJA|3	66403	19.2213	0.000109338	2859.23	2859.24	2.14297	3
1520	14.3146	14.3388	1520	0.957169	3	2;3	3	14.3262	1850.78	1850.7889,1850.789	GM-AEJG-GM-AEJA|2,GM-AEJGA-GM-AEJ|2	507597		GM-AEJKR-GM-AEJ-GM-AEJA (Anhydro) |3	48989	20.2963	8.06644e-05	2910.29	2910.3	1.0384	3
1544	14.5738	14.7919	1544	0.98276	54	2;3	3	14.6937	1850.78	1850.7889,1850.789	GM-AEJG-GM-AEJA|2,GM-AEJGA-GM-AEJ|2	1844368		GM-AEJGA-GM-AEJ-GM-AEJA (Anhydro) |3,GM-AEJG-GM-AEJA-GM-AEJA (Anhydro) |3	36379	21.2245	5.9901e-05	2754.16	2754.16	0.780179	3
1449	13.8541	13.9752	1449	0.997335	23	2;3	3	13.906	1779.75	1779.7518	GM-AEJG-GM-AEJ|2	313857			607318999		1
2160	21.1917	21.2627	2160	0.938262	5	3	4	21.2245	2754.16	2754.1597,2754.1596	GM-AEJGA-GM-AEJ-GM-AEJA (Anhydro) |3,GM-AEJG-GM-AEJA-GM-AEJA (Anhydro) |3	36379
1831	17.692	17.817	1831	0.976993	14	3	5	17.7397	2774.18	2774.1859,2774.1857999999997	GM-AEJGA-GM-AEJ-GM-AEJA|3,GM-AEJG-GM-AEJA-GM-AEJA|3	208093
2001	19.6484	19.7933	2001	0.9189	28	2;3	3	19.7187	1901.8	1901.7999	GM-AEJGA-GM-AEJA (Anhydro) |2	118403
1880	18.2334	18.2974	1880	0.95973	7	3	5	18.2603	2845.22	2845.223	GM-AEJGA-GM-AEJA-GM-AEJA|3	128442
1611	15.3003	15.4601	1611	0.950877	38	3;2	3	15.3548	1921.82	1921.8261	GM-AEJGA-GM-AEJA|2	1122571
902	9.39477	9.53756	902	0.997093	23	2;1	3	9.47418	998.426	998.4292	GM-AEJGA|1	1303144
687	7.73039	8.02995	687	0.9984	56	2;1	3	7.87783	927.39	927.3919999999999	GM-AEJG|1	4113985
1571	14.7792	14.892	1571	0.989007	13	2	3	14.8488	1134.54	1134.54047	GM-AEJKR (Anhydro) |1	1064580
1197	11.6798	11.7483	1197	0.961493	9	2;3	3	11.7261	1134.54	1134.54047	GM-AEJKR (Anhydro) |1	111102
1868	18.0228	18.1761	1868	0.996636	24	3;2	4	18.0941	1986.9	1986.90027	GM-AEJKR-GM-AEJ (Anhydro) |2	684316
1894	18.4295	18.5565	1894	0.969221	18	3	5	18.4929	1986.9	1986.90027	GM-AEJKR-GM-AEJ (Anhydro) |2	377857
2072	20.2658	20.3393	2072	0.942859	9	3	4	20.2963	2910.29	2910.29717	GM-AEJKR-GM-AEJ-GM-AEJA (Anhydro) |3	48989
1786	17.058	17.1638	1786	0.974663	23	4;3	4	17.1147	2930.31	2930.32337	GM-AEJKR-GM-AEJ-GM-AEJA|3	145544
1927	18.9429	19.1389	1927	0.987601	34	2;3	5	19.0113	2057.93	2057.93737	GM-AEJKR-GM-AEJA (Anhydro) |2	2001164
1905	18.5902	18.7811	1905	0.97032	31	3;2	4	18.6731	2057.93	2057.93737	GM-AEJKR-GM-AEJA (Anhydro) |2	1886753
2131	20.9563	21.0556	2131	0.969949	22	4;3	5	21.008	2981.33	2981.33427	GM-AEJKR-GM-AEJA-GM-AEJA (Anhydro) |3	158327
2096	20.6616	20.7682	2096	0.942017	21	4;3	5	20.7003	2981.33	2981.33427	GM-AEJKR-GM-AEJA-GM-AEJA (Anhydro) |3	147914
1811	17.4899	17.6453	1811	0.950423	33	4;3	6	17.5567	3001.35	3001.36047	GM-AEJKR-GM-AEJA-GM-AEJA|3	1123955
1590	15.0603	15.1047	1590	0.936752	4	3	3	15.0816	2077.96	2077.96357	GM-AEJKR-GM-AEJA|2	76092
1568	14.7597	14.9628	1568	0.987304	53	3;2;4	5	14.8566	2077.96	2077.96357	GM-AEJKR-GM-AEJA|2	26496160
1391	13.4156	13.5383	1391	0.965981	26	3;4	4	13.4681	2077.96	2077.96357	GM-AEJKR-GM-AEJA|2	242896
1323	12.8898	12.9254	1323	0.963178	8	3	3	12.9085	2006.92	2006.92647	GM-AEJKR-GM-AEJ|2	43819
1487	14.1163	14.3585	1487	0.989843	42	3;2	5	14.2198	2006.92	2006.92647	GM-AEJKR-GM-AEJ|2	4789591
1408	13.5726	13.5951	1408	0.912408	4	3;4	3	13.5831	2006.92	2006.92647	GM-AEJKR-GM-AEJ|2	26480
600	6.94822	7.19496	600	0.966867	34	3	3	7.05436	1154.56	1154.56667	GM-AEJKR|1	426334
911	9.46842	9.76682	911	0.989962	63	3;2	3	9.5819	1154.56	1154.56667	GM-AEJKR|1	45949242
1243	12.2036	12.2276	1243	0.954507	4	2	3	12.2122	1154.56	1154.56667	GM-AEJKR|1	74993
653	7.35843	7.36735	653	0.994452	3	2	2	7.36227	870.369	870.3706	GM-AEJ|1	50425
637	7.27601	7.31634	637	0.97831	4	2	3	7.29387	870.368	870.3706	GM-AEJ|1	60601
617	7.12961	7.24541	617	0.999964	7	2	3	7.18029	870.369	870.3706	GM-AEJ|1	72505
472	5.5361	5.90514	472	0.998171	57	2	3	5.6772	870.368	870.3706	GM-AEJ|1	1551321
552	6.3061	7.09614	552	0.995746	159	2;1	3	6.5692	870.368	870.3706	GM-AEJ|1	86239890
910	9.46842	9.73211	910	0.999625	32	1	2	9.59417	698.283	698.2858	GM-AE|1	10812725
858	9.04334	9.13428	858	0.998684	16	1	2	9.09359	698.284	698.2858	GM-AE|1	119673
1754	16.8254	16.8738	1754	0.958376	5	3	5	16.8499	2271.94	2271.9474,2271.9474	GM-GM-AEJ-GM-AEJA|2,GM-GM-AEJA-GM-AEJ|2	51277
1810	17.4721	17.571	1810	0.969108	12	3;2	5	17.5196	2342.98	2342.9845,2342.9845	GM-GM-AEJA-GM-AEJA|2,GM-GM-AEJAA-GM-AEJ|2	522343
1338	13.0162	13.202	1338	0.994719	33	2	3	13.1008	1419.58	1419.5876	GM-GM-AEJA|1	795910
1242	12.1782	12.2468	1242	0.98777	12	3;2	4	12.2157	1632.74	1632.74657	GM-GM-AEJKR|1	73923
1137	11.295	11.4009	1137	0.995506	17	2	3	11.3422	1348.55	1348.5505	GM-GM-AEJ|1	468923
134	2.62605	2.73822	134	0.997647	19	1	2	2.68113	498.205	498.2061	GM|0	230608
266	3.47152	3.87147	266	0.999775	58	1	2	3.62107	498.205	498.2061	GM|0	14718041
769	8.4751	8.64412	769	0.993583	49	2;1	3	8.54113	738.326	738.3284	M-AEJA|1	265980
1129	11.2133	11.2754	1129	0.997695	7	2;1	2	11.2483	738.326	738.3284	M-AEJA|1	186223
1497	14.1459	14.1915	1497	0.926773	5	3	3	14.1757	1874.88	1874.88427	M-AEJKR-GM-AEJA|2	104393
740	8.18828	8.22722	740	0.999652	5	2;3	3	8.2217	951.484	951.48737	M-AEJKR|1	723732
367	4.49799	4.6522	367	0.997433	42	1;2	2	4.57086	667.289	667.2913	M-AEJ|1	149430
1	1.66443	1.69743	1	0.993122	8	1;2	2	1.68498	665.416			115555
2	1.66898	1.69743	2	0.999785	3	1	2	1.68784	295.135			79877
3	1.68414	1.69743	3	0.999092	5	1	2	1.69378	238.14			74927
4	1.66898	1.69743	4	0.997947	9	1	2	1.68618	234.161			307534
5	1.66898	1.68414	5	0.94973	3	1	2	1.6706	330.907			93449
6	1.66898	1.69743	6	1	5	1	2	1.68371	282.166			70542
7	1.66898	1.67343	7	0.99793	3	1	2	1.67141	252.902			45376
8	1.65985	1.69743	8	0.978622	3	1	2	1.69152	412.257			72118
9	1.66443	1.69743	9	0.998511	4	2	3	1.67976	682.444			37731
10	1.66898	1.69743	10	0.997869	3	1	2	1.68549	329.994			57175
11	1.66898	1.69153	11	0.998179	4	1	2	1.67261	304.847			297592
12	1.66898	1.68414	12	0.999976	3	1	2	1.67423	222.98			256341
13	1.66898	1.69743	13	0.999352	8	1	2	1.68078	327.907			413688
14	1.66898	1.69743	14	0.999991	4	1	2	1.67119	281.903			428633
15	1.66898	1.69743	15	0.99873	6	1	2	1.6847	325.999			193416
16	1.66898	1.69743	16	0.999134	5	1	2	1.68554	227.224			113093
17	1.66898	1.69743	17	0.999899	3	1	2	1.68354	354.061			25720
18	1.68414	1.69743	18	0.993297	3	1	2	1.68971	249.964			19613
19	1.66898	1.70809	19	0.999998	9	1	2	1.70008	390.195			1360781
20	1.66898	1.69743	20	0.999582	7	1	2	1.6849	298.118			158220
21	1.66898	1.68414	21	0.999225	3	1	2	1.67282	274.952			78090
22	1.66898	1.68414	22	0.999325	3	1	2	1.6726	298.881			35107
23	1.66898	1.69743	23	0.998788	3	1	2	1.68933	276.171			43043
24	1.69153	1.69743	24	0.996555	3	1	2	1.69365	607.374			65764
25	1.68414	1.69743	25	0.999997	3	1	2	1.69015	220.146			67091
26	1.66898	1.69743	26	0.992454	4	1	2	1.68794	343.199			61994
27	1.66898	1.69743	27	0.997523	3	1	2	1.68889	218.166			77443
28	1.66898	1.69743	28	0.999904	3	1	2	1.68677	305.234			19182
29	1.66443	1.69743	29	0.999974	3	1	2	1.69175	480.252			55249
30	1.69153	1.69743	30	0.99971	3	1	2	1.69511	216.096			74887
31	1.66443	1.69743	31	0.999626	3	1	2	1.69058	740.184			19826
32	1.69743	1.71747	32	0.991634	3	1	2	1.71458	361.916			14489015
33	1.70809	1.72569	33	0.981985	3	1	2	1.72035	565.878			21250478
34	1.70809	1.75038	34	0.951756	6	1	2	1.73725	1041.79			30754942
35	1.70809	1.74215	35	0.955292	5	1	2	1.73225	1109.77			21746668
36	1.70809	1.74215	36	0.957281	3	1	2	1.73524	1177.76			16368711
37	1.70809	1.83273	37	0.974294	11	1	2	1.75314	701.852			61945388
38	1.70809	1.77514	38	0.985598	9	1	2	1.74725	633.866			45174692
39	1.70809	1.77514	39	0.964566	9	1	2	1.74755	905.813			42961676
40	1.70809	1.76691	40	0.948637	8	1	2	1.74458	973.801			44274100
41	1.70809	1.83273	41	0.975357	13	1	2	1.75512	837.826			61210320
42	1.70809	1.84096	42	0.968094	13	1	2	1.75644	769.839			62438864
43	1.70809	1.73392	43	0.993648	4	1	2	1.7254	429.904			28400194
44	1.69743	1.74215	44	0.973007	3	1;2	2	1.7389	1245.75			13581290
45	1.90768	6.43896	45	0.998833	1168	1	2	4.1963	234.161			638384
46	1.91633	3.53016	46	0.998453	261	1	2	2.73227	327.997			884361
47	1.90768	2.07017	47	0.999434	13	1	2	1.99754	298.118			298333
48	1.90768	1.93503	48	0.99793	4	1	2	1.92236	390.276			203364
49	1.91633	1.97861	49	0.999979	7	1	2	1.94067	228.135			132787
50	1.92497	2.04534	50	0.998919	7	1	2	1.98226	282.167			195607
51	1.92497	1.94367	51	0.958394	3	1	2	1.93339	276.934			167540
52	1.91633	2.02092	52	0.999683	8	1	2	1.9681	326			829208
53	1.91633	3.56331	53	0.999489	255	1	2	2.72052	227.224			283703
54	1.94367	1.98746	54	0.999722	4	1	2	1.96265	329.994			240824
55	1.98746	2.02092	55	0.99938	4	1	2	2.00427	295.136			164316
56	2.00349	3.516	56	0.997596	245	1	2	2.77265	390.276			312341
57	1.98746	2.02092	57	0.999718	3	1	2	2.00607	276.172			138203
58	2.0123	2.22642	58	0.999778	29	1	2	2.09866	209.072			10949130
59	2.02955	2.08786	59	0.99994	5	1	2	2.06315	231.053			757606
60	2.04534	2.19127	60	0.999093	7	1	2	2.0909	211.067			547047
61	2.0123	3.5213	61	1	253	1	2	2.7622	228.208			150913
62	2.04534	2.07901	62	0.999314	3	1	2	2.06142	254.129			436438
63	2.07017	2.11188	63	0.99925	5	1	2	2.09464	326			901590
64	2.08786	2.11188	64	0.999902	3	1	2	2.0984	282.141			174550
65	2.0973	2.13216	65	0.999528	6	1	2	2.11539	335.136			1095113
66	2.05396	3.5106	66	0.996812	173	1	2	2.81273	329.994			349850
67	2.1496	3.516	67	0.993066	230	1	2	2.86961	370.092			220939
68	2.1496	2.22642	68	0.997579	6	1	2	2.18356	295.136			173486
69	2.15703	3.516	69	0.997863	238	1	2	2.8186	326			748047
70	2.15703	3.48964	70	0.999638	164	1	2	2.8055	238.141			220418
71	2.17013	3.53016	71	0.999869	434	1	2	2.86163	282.167			196601
72	2.17013	3.5106	72	0.999547	250	1	2	2.94876	220.146			143667
73	2.1779	2.27571	73	0.998749	10	1	2	2.22465	276.172			154962
74	2.17013	2.23705	74	0.953264	5	1	2	2.20598	201.91			87432
75	2.15703	3.5213	75	0.999275	260	1	2	2.87005	298.118			374386
76	2.20734	3.5106	76	0.99997	259	1	2	2.52679	218.09			3484886
77	2.20734	2.27571	77	0.995238	4	1	2	2.2359	354.061			124524
78	2.20734	2.34906	78	0.993627	7	1	2	2.27178	380.838			112500
79	2.2148	2.49251	79	0.999967	21	1	2	2.38007	284.271			87213
80	2.1779	2.51517	80	0.999577	27	1	2	2.36799	216.099			115281
81	2.20734	3.48964	81	0.999903	197	1	2	2.8459	278.151			219386
83	2.22642	2.27571	83	0.980984	4	3	2	2.25178	845.747			74060
84	2.23705	2.26834	84	0.996787	3	1	2	2.25237	348.848			159355
85	2.26834	2.45241	85	0.994198	13	3	2	2.36379	761.754			73813
86	2.31544	2.37794	86	0.996968	5	1	2	2.33985	271.163			120069
87	2.32115	3.5106	87	0.999571	197	1	2	2.92264	354.062			205251
88	2.32115	2.533	88	0.997423	16	1	2	2.43972	398.338			60873
89	2.35418	2.51003	89	0.999157	19	1	2	2.43648	283.892			48889
90	2.36136	2.38375	90	0.997569	3	1	2	2.3741	276.171			114094
91	2.37794	2.43458	91	0.999725	4	1	2	2.40698	222.056			41158
92	2.40503	2.43904	92	0.997435	5	1	2	2.42182	380.838			74625
93	2.36136	2.4598	93	0.928147	8	2	3	2.3974	1352.38			113242
94	2.34906	2.4598	94	0.998425	7	1	2	2.40937	256.239			110248
95	2.37276	2.50434	95	0.970022	14	1	2	2.44365	740.186			68452
96	2.36136	2.42953	96	0.999856	4	1	2	2.39655	372.089			34194
97	2.36136	2.49844	97	0.999234	9	1	2	2.43734	212.915			102988
98	2.39439	2.42382	98	1	3	1	2	2.40703	213.082			51599
99	2.42382	2.533	99	0.999976	12	1	2	2.47359	295.136			143332
100	2.42953	2.57282	100	0.997913	17	1	2	2.50236	276.172			120618
101	2.41831	2.45241	101	0.999498	3	1	2	2.43738	348.849			65192
102	2.45241	2.51003	102	0.998715	5	1	2	2.48478	243.085			30854
103	2.47653	2.59393	103	0.998792	12	1	2	2.53582	222.056			46247
104	2.47102	2.52854	104	0.999997	6	1	2	2.50227	380.838			58592
105	2.4598	2.54191	105	0.998232	8	1	2	2.50472	372.089			42939
106	2.4653	2.53745	106	0.999857	7	1	2	2.49684	281.213			43325
107	2.47102	2.51003	107	0.999998	4	1	2	2.48955	270.255			41057
108	2.48717	2.49844	108	0.993367	3	1	2	2.49298	348.848			36555
109	2.49251	2.51963	109	0.983545	4	4	2	2.50765	799.757			40322
111	2.49844	2.52408	111	0.998858	3	1	2	2.51416	279.887			28935
112	2.51963	2.57872	112	0.995332	6	1	2	2.54025	326.193			26943
113	2.52854	2.62074	113	0.99941	7	1	2	2.56943	212.915			128012
114	2.533	3.5106	114	0.935583	108	1	2	3.01302	740.187			66576
115	2.49844	2.533	115	0.999796	4	1	2	2.51726	201.91			39180
116	2.51003	2.533	116	0.999754	3	1	2	2.52278	412.828			28493
117	2.52408	2.61542	117	0.999712	10	1	2	2.55726	284.27			62280
118	2.51517	2.80451	118	0.998949	21	1	2	2.65214	213.082			47086
119	2.533	2.62605	119	0.999975	9	1	2	2.57883	348.848			59398
120	2.52408	2.55625	120	0.999617	3	1	2	2.53915	202.095			31537
121	2.51963	2.58616	121	0.999922	4	1	2	2.55195	260.891			32015
122	2.55625	2.57872	122	0.999762	5	1	2	2.5675	235.907			78070
123	2.56197	2.80451	123	0.996751	22	1	2	2.66306	380.838			46020
124	2.55075	2.62074	124	0.999358	5	1	2	2.59163	226.229			35558
125	2.55625	3.42799	125	0.98638	119	4	3	3.01697	935.775			139256
126	2.55625	2.59393	126	0.999709	6	1	2	2.57675	216.099			94675
127	2.55625	2.64284	127	0.999829	12	1	2	2.60101	283.892			34903
128	2.55625	2.72155	128	0.998195	18	1	2	2.64362	279.887			36077
129	2.56747	2.69924	129	0.997216	13	1	2	2.63818	295.136			129164
130	2.57282	2.64284	130	1	7	1	2	2.61023	281.213			33642
131	2.60477	2.61542	131	0.978575	3	1	2	2.6097	364.843			20193
132	2.61542	3.3394	132	0.996085	79	1	2	2.99721	398.338			57578
133	2.62605	2.71603	133	0.991064	10	1	2	2.67015	222.056			39699
135	2.62605	3.12143	135	0.999892	54	1	2	2.85293	216.099			86140
136	2.62074	2.84507	136	0.953496	20	1	2	2.72762	444.111			57130
137	2.6101	3.47152	137	0.999986	106	1	2	3.03177	276.172			114900
138	2.59393	2.8152	138	0.995842	19	1	2	2.71658	254.26			33367
139	2.62605	2.71011	139	0.968535	5	1	2	2.66903	221.104			24753
140	2.63197	2.68244	140	0.998379	3	1	2	2.6549	256.239			88163
141	2.65428	2.80451	141	0.998683	18	1	2	2.7159	284.271			67460
142	2.65963	2.70477	142	0.998709	5	1	2	2.68742	372.089			34991
143	2.67653	2.75482	143	0.921887	7	4	2	2.70745	799.757			29755
144	2.68796	2.74357	144	1	6	1	2	2.71775	283.892			36361
145	2.68796	2.71011	145	0.99927	4	1	2	2.69898	281.213			23933
146	2.65428	2.71011	146	0.999046	6	1	2	2.681	260.891			29175
147	2.69331	2.75482	147	0.998838	5	1	2	2.72095	348.848			29536
148	2.68796	2.72689	148	0.924736	3	3	3	2.70909	761.706			31351
149	2.73271	3.516	149	0.997164	94	1	2	3.12852	295.136			154345
150	2.71603	2.7489	150	0.999669	4	1	2	2.73995	226.229			38801
151	2.74357	2.88334	151	0.99993	15	1	2	2.81411	281.213			36931
152	2.75482	2.8373	152	0.999324	14	1	2	2.79152	519.203			195042
153	2.75482	2.80451	153	0.996213	5	1	2	2.77603	305.234			39715
154	2.75482	2.84507	154	0.998963	6	1	2	2.78878	279.887			35170
155	2.75482	2.82113	155	0.996596	9	1	2	2.78276	230.925			30149
156	2.75482	3.09563	156	0.989846	32	1	2	2.91833	222.056			35078
157	2.73271	2.80451	157	0.999683	8	1	2	2.77866	372.089			31101
158	2.74357	2.77732	158	0.996722	3	1	2	2.75435	262.897			78120
159	2.76643	2.85059	159	0.997887	7	1	2	2.79678	256.239			89562
160	2.77196	2.79859	160	0.999772	6	1	2	2.78666	497.221			76335
161	2.77732	2.81005	161	0.999628	4	1	2	2.79103	283.892			35202
162	2.79327	2.91159	162	0.999884	21	1	2	2.85237	496.189			332725
163	2.76643	2.80451	163	0.99951	4	1	2	2.78986	306.142			48275
164	2.78262	2.8152	164	0.999823	3	1	2	2.80402	235.931			56839
165	2.80451	2.85059	165	0.997467	7	1	2	2.82452	285.143			124648
166	2.83179	2.84507	166	0.999487	3	1	2	2.83748	212.915			113886
167	2.84507	2.86201	167	0.996388	3	1	2	2.85458	436.169			66209
168	2.85059	3.00051	168	0.999863	11	1	2	2.92149	284.27			49761
169	2.84507	2.89479	169	0.999853	7	1	2	2.86583	380.838			28883
170	2.84507	3.05654	170	0.999928	19	1	2	2.95156	213.082			42404
171	2.87269	3.00051	171	0.96053	14	1	2	2.92918	216.952			26938
172	2.86736	2.90013	172	0.997056	3	1	2	2.88141	253.902			33130
173	2.86201	2.91159	173	0.999709	5	1	2	2.893	235.931			54672
174	2.878	2.9669	174	0.969107	8	1	2	2.9174	279.887			25958
175	2.88334	2.94536	175	0.99486	5	1	2	2.90698	326.193			20634
176	2.88334	3.19962	176	0.996574	26	1	2	3.05102	444.112			64499
177	2.86736	2.92226	177	0.998523	3	1	2	2.89187	222.955			33587
178	2.87269	2.95625	178	0.997092	10	1	2	2.91801	372.089			33213
179	2.89479	2.92226	179	0.997728	3	1	2	2.91158	270.255			26183
180	2.91159	2.92226	180	0.927705	3	1	2	2.91722	428.08			38032
181	2.87269	2.92226	181	0.983752	5	1	2	2.90397	251.151			28880
182	2.90013	2.91694	182	0.99991	3	1	2	2.90533	254.224			26580
183	2.88334	2.928	183	0.999984	5	1	2	2.91399	300.114			35250
184	2.86736	2.91694	184	0.999781	3	1	2	2.88664	267.97			35565
185	2.91694	3.01515	185	0.999951	9	1	2	2.97367	281.213			26816
186	2.94536	3.19962	186	0.999786	21	1	2	3.08258	253.902			45457
187	2.95089	2.9669	187	0.999502	5	1	2	2.95835	235.931			63602
188	2.93392	2.99518	188	0.998392	5	1	2	2.9669	226.229			30973
189	2.93392	3.05654	189	0.999417	9	1	2	3.003	242.937			27698
190	2.95625	3.01515	190	0.999475	6	1	2	2.98525	212.915			103908
191	2.96157	2.98371	191	0.995187	3	1	2	2.9718	222.955			24164
192	2.96157	2.98963	192	0.999934	4	1	2	2.97269	300.114			22365
193	2.96157	3.03144	193	0.997241	6	1	2	2.99412	251.151			30135
194	2.97837	3.05208	194	0.999268	5	1	2	3.00729	254.26			31062
195	2.9669	3.00497	195	0.969024	3	1	2	2.98602	666.165			28421
196	2.97282	3.06799	196	0.997585	6	1	2	3.01838	256.239			74701
197	2.96157	3.00051	197	0.966387	3	4	3	2.98185	799.757			27820
198	3.00051	3.01961	198	0.999318	3	1	2	3.01587	235.931			82745
199	3.00497	3.03144	199	0.998617	3	1	2	3.02267	250.117			24605
200	3.03696	3.11552	200	0.999408	6	1	2	3.07797	233.944			138728
201	3.02553	3.05654	201	0.999378	3	1	2	3.04313	372.089			36916
202	3.04234	3.08989	202	0.997997	4	1	2	3.06148	283.892			22432
203	3.04763	3.07925	203	0.99928	3	1	2	3.06034	235.93			89420
204	3.04234	3.07925	204	0.978121	4	1	2	3.06	216.951			22313
205	3.05654	3.08989	205	0.996736	4	1	2	3.07407	281.214			25685
206	3.06799	3.26162	206	0.999233	15	1	2	3.16923	300.114			32018
207	3.07371	3.10069	207	0.999017	4	1	2	3.08612	279.887			26967
208	3.06799	3.08459	208	0.999931	3	1	2	3.07568	326.192			30275
209	3.08459	3.19962	209	0.998214	12	1	2	3.14525	254.26			29359
210	3.08989	3.11552	210	0.999869	4	1	2	3.10111	284.27			48663
211	3.07371	3.24489	211	0.999859	11	1	2	3.15522	251.151			25437
212	3.08989	3.18625	212	0.999479	7	1	2	3.13588	212.915			105576
213	3.10514	3.19071	213	0.999443	9	1	2	3.1463	372.089			41164
214	3.09563	3.14887	214	0.994596	4	1	2	3.12707	213.082			39057
215	3.12697	3.22233	215	0.999188	10	1	2	3.17332	222.056			39156
216	3.13763	3.16564	216	0.995308	4	1	2	3.15228	262.897			79319
217	3.13763	3.18179	217	0.999334	5	1	2	3.15875	256.959			46966
218	3.14295	3.1544	218	0.990135	3	4	2	3.14952	799.757			35207
219	3.1544	3.21145	219	0.999607	6	1	2	3.18468	256.239			81351
220	3.14887	3.35911	220	0.999965	19	1	2	3.25366	284.271			52857
221	3.14887	3.43879	221	0.999845	34	1	2	3.27922	216.1			68765
222	3.13763	3.19071	222	0.986842	6	1	2	3.16764	279.887			31201
223	3.12143	3.1544	223	0.997966	3	1	2	3.13931	281.213			24387
224	3.17672	3.19962	224	0.992593	3	1	2	3.19098	242.937			18837
225	3.19962	3.22233	225	0.99998	3	1	2	3.21256	262.897			64788
226	3.18179	3.25576	226	0.998756	8	1	2	3.2137	213.082			44314
227	3.17099	3.22762	227	0.999042	5	1	2	3.20568	226.229			33129
228	3.16011	3.19516	228	0.999092	3	1	2	3.17778	235.931			90089
229	3.21698	3.25576	229	0.999391	5	1	2	3.23715	233.944			137082
230	3.21698	3.22762	230	0.998501	3	1	2	3.22229	372.089			37988
231	3.22762	3.29476	231	0.997147	10	1	2	3.26391	281.213			35621
232	3.21698	3.24489	232	0.993556	3	1	2	3.23106	268.276			17384
233	3.23355	3.44965	233	0.984348	29	1	2	3.33834	444.112			59056
234	3.23907	3.46559	234	0.997912	27	1	2	3.34387	253.902			56792
235	3.25043	3.41676	235	0.983829	26	2	2	3.32948	886.363			103288
236	3.27098	3.28881	236	0.999951	3	1	2	3.27855	222.056			38681
237	3.27544	3.38877	237	0.998934	12	1	2	3.32356	372.089			39680
238	3.26162	3.3394	238	0.995731	5	1	2	3.30393	226.229			35437
239	3.29476	3.35465	239	0.999989	6	1	2	3.3264	213.082			42285
240	3.31138	3.32282	240	0.999937	3	1	2	3.31813	683.284			62112
241	3.30068	3.3394	241	0.994588	4	1	2	3.31249	251.151			26808
242	3.27989	3.48964	242	0.999047	16	1	2	3.39782	212.915			140993
243	3.30068	3.32282	243	0.999173	3	1	2	3.31265	233.944			153899
244	3.31138	3.35019	244	0.998489	4	1	2	3.33065	262.897			79671
245	3.29476	3.38286	245	0.999551	6	1	2	3.33816	235.931			78790
246	3.28881	3.35911	246	0.999999	4	1	2	3.33018	300.114			29771
247	3.3173	3.3394	247	0.973598	3	4	2	3.32807	799.757			24255
248	3.33406	3.46559	248	0.999868	12	1	2	3.38946	281.214			31756
249	3.34512	3.38286	249	0.999404	6	1	2	3.36668	256.239			78117
250	3.35465	3.45494	250	0.999207	10	1	2	3.41443	233.944			172445
251	3.3394	3.35465	251	0.999724	4	1	2	3.34752	222.056			29859
252	3.36802	3.41105	252	0.998389	5	1	2	3.3829	226.229			36365
253	3.36356	3.38877	253	0.997643	3	1	2	3.37337	254.26			32761
254	3.39429	3.47898	254	0.972405	9	1	2	3.43899	398.339			48223
255	3.40553	3.44432	255	0.996245	4	1	2	3.42533	251.151			25899
256	3.42228	3.44965	256	0.999971	3	1	2	3.43829	280.907			31424
257	3.42799	3.49709	257	0.999712	7	1	2	3.45628	372.09			31219
258	3.43288	3.5106	258	0.987082	6	1	2	3.46937	254.26			34364
259	3.41676	3.47152	259	0.999583	5	1	2	3.44399	213.082			47775
260	3.41676	3.46027	260	0.999171	3	1	2	3.43851	326.193			22647
261	3.43879	3.47152	261	0.99872	3	1	2	3.45009	284.271			63210
262	3.44965	3.46027	262	0.99658	3	1	2	3.45519	251.91			20406
263	3.45494	3.90337	263	0.999426	66	1	2	3.62064	520.187			20531984
264	3.42799	3.46559	264	0.995395	3	1	2	3.45137	262.897			86078
265	3.46027	3.5213	265	0.989124	7	4	2	3.48862	935.775			164347
267	3.47152	3.47898	267	0.999995	3	1	2	3.47452	216.1			55752
268	3.50281	3.72031	268	0.996969	27	1;2	2	3.60696	536.151			1421714
270	3.66418	6.39168	270	0.999597	465	1	2	5.03664	370.093			255079
271	3.67136	6.39168	271	0.999811	383	1	2	5.0878	233.944			286546
272	3.6857	6.39168	272	0.999162	463	1	2	5.03093	326			614545
273	3.67853	6.36332	273	0.996684	458	1	2	4.98764	390.276			203690
274	3.67136	6.40379	274	0.996843	407	1	2	4.98042	227.224			192952
275	3.67853	6.39168	275	0.99961	464	1	2	5.02434	327.997			565988
276	3.67853	6.38274	276	0.997241	321	1	2	5.07819	329.994			194924
277	3.6857	5.4377	277	0.999565	290	1	2	4.57089	218.166			164007
278	3.69682	6.36332	278	0.997582	443	1	2	5.00569	354.061			220144
279	3.67136	3.72031	279	0.986343	5	1	2	3.69522	551.117			172068
280	3.67853	6.38274	280	0.99712	528	1	2	5.0479	298.118			381801
281	3.69142	6.41242	281	0.999658	916	1	2	5.0616	282.167			193906
282	3.64493	3.70955	282	0.990516	4	4	2	3.67616	935.775			182035
283	3.69142	3.90337	283	0.992048	22	1	2	3.80428	278.151			159950
284	3.70955	6.40379	284	0.999795	515	1	2	5.12478	228.208			139981
285	3.70955	5.4377	285	0.999824	306	1	2	4.56318	220.084			197782
286	3.73628	5.06577	286	0.999702	130	1	2	4.4325	740.186			89150
287	3.7416	4.94346	287	0.999991	139	1	2	4.37165	238.141			218093
288	3.72563	3.89278	288	0.999317	14	1	2	3.79982	276.172			122524
289	3.73628	4.07053	289	0.999428	30	1	2	3.90226	216.1			60752
290	3.75468	3.79213	290	0.998392	4	2	2	3.77691	536.151			874033
291	3.72031	3.90337	291	0.999364	13	1	2	3.80955	212.915			162303
292	3.76248	3.84143	292	0.999646	11	1	2	3.80788	253.902			59334
293	3.79213	3.87147	293	0.99985	11	1	2	3.8309	236.079			138822
294	3.78111	3.85217	294	0.933771	4	1	2	3.81335	444.112			53646
295	3.80298	4.2616	295	1	85	1	2	3.95429	518.171			380677
296	3.80831	3.82958	296	0.999943	3	1	2	3.81638	254.26			24691
297	3.81362	4.17251	297	0.99946	58	1	2	3.94989	496.189			803054
298	3.80831	4.00096	298	0.993423	18	1	2	3.90465	281.213			32005
299	3.80831	3.85217	299	0.996237	4	1	2	3.82846	372.089			37472
301	3.83552	3.88763	301	0.998789	4	1	2	3.864	256.239			95492
302	3.83552	3.985	302	0.987939	22	2	2	3.91134	892.363			138568
303	3.83552	3.87147	303	0.998998	3	1	2	3.85013	222.056			29962
304	3.89278	5.06577	304	0.998488	171	1	2	4.52798	253.902			84761
305	3.91399	5.25558	305	0.997189	159	1	2	4.57304	295.136			151031
306	3.93848	5.06045	306	0.999353	152	1	2	4.46925	278.151			153094
307	3.92706	3.96883	307	0.98103	3	1	2	3.94974	251.151			24730
308	3.91931	4.92337	308	0.98615	90	1	2	4.42558	444.112			62167
309	3.92706	3.97435	309	0.999891	3	1	2	3.94987	372.088			34525
310	3.96289	4.08118	310	1	10	1	2	4.00907	235.931			79404
311	3.96289	4.02548	311	0.999755	8	1	2	3.99426	230.925			31256
312	3.97968	4.07053	312	0.996692	9	1	2	4.02221	276.172			93770
313	3.985	4.0429	313	0.999695	7	1	2	4.00884	226.229			36044
314	3.99033	4.04842	314	0.999135	5	1	2	4.01849	212.915			134704
315	3.96883	4.21166	315	0.997357	21	1	2	4.09504	256.239			95645
316	4.00096	4.13443	316	0.998825	8	1	2	4.05266	251.151			29606
317	4.01404	4.0429	317	0.998205	4	1	2	4.02808	213.082			41102
318	3.99033	4.16187	318	0.999971	15	1	2	4.08031	254.224			30023
319	4.00628	4.12891	319	0.998345	10	1	2	4.06639	372.089			34288
320	4.03144	4.12891	320	0.999999	10	1	2	4.07974	222.056			39760
321	4.01404	4.07053	321	0.999966	6	1	2	4.04897	280.908			38839
322	4.05435	4.10618	322	0.999811	7	1	2	4.07524	281.214			32660
323	4.06522	4.09581	323	0.948705	5	4	2	4.08437	799.758			22233
324	4.07587	4.12298	324	0.999474	4	1	2	4.09488	326.193			23795
325	4.08118	4.12298	325	0.959521	4	1	2	4.09698	221.104			19859
326	4.10027	4.28172	326	0.999184	12	1	2	4.18793	212.915			162438
327	4.11764	4.14036	327	0.992882	3	1	2	4.12927	213.082			36907
328	4.07053	4.17824	328	0.999861	9	1	2	4.13104	226.229			33780
329	4.10027	4.26667	329	0.998902	16	1	2	4.19136	276.172			109643
330	4.14036	4.16187	330	0.999285	3	1	2	4.15014	270.255			34425
331	4.14036	4.1892	331	0.999042	8	1	2	4.16496	281.213			30572
332	4.14036	4.17251	332	0.999532	4	1	2	4.15512	356.058			31696
333	4.12891	4.16187	333	0.966115	3	6	3	4.14658	1775.4			18340
334	4.15124	4.17824	334	0.996849	3	1	2	4.16238	251.91			21758
335	4.15654	4.17251	335	0.999993	3	1	2	4.1631	262.897			117949
336	4.16187	4.54915	336	0.996864	32	1	2	4.34142	372.089			46245
337	4.15654	4.29462	337	0.999895	9	1	2	4.24282	326.193			30137
338	4.17251	4.1951	338	0.999923	3	1	2	4.18335	222.056			33307
339	4.17824	4.27113	339	0.999661	9	1	2	4.21729	216.099			63964
340	4.16187	4.28172	340	0.999605	7	1	2	4.22074	280.908			36647
341	4.22312	4.56784	341	0.999952	31	1	2	4.37681	496.189			98855
342	4.22904	4.25054	342	0.997861	4	1	2	4.23874	226.229			29166
343	4.24523	4.28172	343	0.999424	4	1	2	4.26657	256.239			100089
344	4.22904	4.32818	344	0.90571	8	1	2	4.27917	254.26			33831
345	4.22904	4.37547	345	0.999368	12	1	2	4.29441	281.214			31128
346	4.22904	4.32818	346	1	9	1	2	4.28213	251.151			28735
347	4.21758	4.26667	347	0.999615	4	1	2	4.24007	284.271			68732
348	4.30588	4.49799	348	0.999576	18	1	2	4.40323	216.099			67866
349	4.28909	4.57337	349	0.99393	24	1	2	4.416	518.171			46933
350	4.31139	4.60967	350	0.993814	29	1	2	4.45453	276.172			98086
351	4.30588	4.34155	351	0.900706	3	6	3	4.32413	1511.44			33089
352	4.32818	4.4149	352	0.997226	11	1	2	4.37225	256.239			93559
353	4.33709	4.39283	353	0.997213	5	1	2	4.36531	326.193			25737
354	4.33263	4.35616	354	0.992221	4	1	2	4.34504	284.271			65282
355	4.31139	4.44883	355	0.999854	12	1	2	4.39136	222.056			45776
356	4.35616	4.46957	356	0.998784	14	1	2	4.41258	280.908			43677
357	4.35616	4.42612	357	0.999288	7	1	2	4.38748	251.151			28828
358	4.36062	4.39283	358	0.971439	4	4	2	4.3776	799.757			24550
359	4.37547	4.39835	359	0.99997	3	1	2	4.38558	226.229			36587
360	4.3869	4.42612	360	0.996842	3	1	2	4.39846	262.897			130084
361	4.3517	4.4149	361	0.99995	4	1	2	4.37864	213.082			37278
362	4.39283	4.44438	362	0.999921	6	1	2	4.41608	254.224			24505
363	4.42042	4.56784	363	0.999737	21	1	2	4.4774	236.079			124980
364	4.43992	4.47509	364	0.951974	3	4	2	4.45666	799.757			27451
365	4.48101	4.50333	365	0.99569	3	1	2	4.49123	251.151			25958
366	4.49247	4.51108	366	0.99946	3	1	2	4.50242	212.915			153323
368	4.49799	4.64649	368	0.999686	13	1	2	4.5717	222.055			36863
369	4.48101	4.53257	369	0.998481	3	1	2	4.50715	256.239			84141
370	4.51663	4.58481	370	0.999406	7	1	2	4.5482	280.908			34858
371	4.52193	4.56784	371	0.999878	4	1	2	4.53889	281.213			31533
372	4.55661	4.57929	372	0.999746	4	1	2	4.5707	254.224			31733
373	4.56212	4.62914	373	0.999089	9	1	2	4.59521	568.258			81851
374	4.57337	4.58481	374	0.993265	3	1	2	4.57918	251.151			20302
375	4.58481	4.79737	375	0.999698	20	1	2	4.67104	372.089			40038
376	4.59584	4.61412	376	0.999219	4	1	2	4.60531	212.915			156383
377	4.60521	4.61412	377	0.986112	3	1	2	4.61007	281.213			25415
378	4.60967	4.70225	378	0.999966	9	1	2	4.66427	254.26			28084
379	4.61858	4.8086	379	0.99996	18	1	2	4.70318	518.172			40738
380	4.60967	4.65772	380	0.999782	4	1	2	4.63389	496.189			87992
381	4.60075	4.62914	381	0.996579	3	1	2	4.61055	226.229			33877
382	4.61412	4.89915	382	0.998642	28	1	2	4.76406	280.907			47184
383	4.62304	4.67489	383	0.996059	4	1	2	4.64249	213.082			30866
384	4.61858	4.66365	384	0.998736	3	1	2	4.6399	256.239			88850
385	4.63507	4.66918	385	0.992455	4	1	2	4.65257	284.271			59242
386	4.64649	4.67489	386	0.999971	3	1	2	4.66149	212.915			165671
387	4.62914	4.73859	387	0.999663	10	1	2	4.68474	216.099			60046
388	4.66365	4.68888	388	0.998994	5	1	2	4.67617	276.172			101827
389	4.66918	4.7867	389	0.982668	8	1	2	4.72402	251.151			28529
390	4.69333	4.85757	390	0.999863	16	1	2	4.77583	281.213			38751
391	4.71536	4.73272	391	0.999185	3	1	2	4.72253	212.915			144761
392	4.69779	4.73859	392	0.998342	4	1	2	4.71621	256.239			90939
394	4.70225	4.79737	394	0.999589	7	1	2	4.74563	226.229			40077
395	4.68888	5	395	0.999445	29	1	2	4.85741	496.189			105638
396	4.69333	4.72719	396	0.998172	3	1	2	4.70965	326.193			28349
397	4.69779	4.73859	397	0.999925	3	1	2	4.71958	222.056			32054
398	4.72129	4.77506	398	0.99778	5	1	2	4.75025	276.172			84725
399	4.73272	4.79737	399	0.999575	5	1	2	4.76096	254.26			26192
400	4.72719	4.76129	400	0.996433	3	1	2	4.74231	742.185			43428
401	4.73859	4.76129	401	0.992546	3	1	2	4.75023	284.27			65230
402	4.77506	4.93812	402	0.984781	27	2	3	4.8491	1042.45			153278
403	4.77506	4.87094	403	0.998804	6	1	2	4.82074	326.193			26624
404	4.8086	5.01712	404	0.999648	22	1	2	4.90088	216.1			70466
405	4.8086	4.88431	405	0.995046	10	1	2	4.84616	839.376			67191
406	4.81451	4.94877	406	0.99887	14	1	2	4.88124	256.239			103404
407	4.81451	4.85757	407	0.995448	5	1	2	4.83681	276.172			100506
408	4.81451	4.87094	408	0.998045	5	1	2	4.84711	284.271			63642
409	4.83635	4.9125	409	0.994185	6	1	2	4.86619	222.056			42723
410	4.83635	4.92337	410	0.999167	6	1	2	4.87458	251.151			32169
411	4.86202	4.8754	411	0.999679	3	1	2	4.86993	254.259			26148
412	4.86648	4.94877	412	0.999344	7	1	2	4.89972	212.915			159588
413	4.86648	4.87985	413	0.992001	3	1	2	4.87243	226.229			32753
414	4.87094	5.06577	414	0.998304	31	1	2	4.98148	518.171			46299
415	4.8754	4.9125	415	0.985503	3	1	2	4.89096	221.104			21542
416	4.9125	5.01712	416	0.997699	10	1	2	4.97046	276.172			95676
417	4.91802	5.01712	417	0.997868	10	1	2	4.96438	372.089			54981
418	4.9326	5.12483	418	0.992366	29	2	3	5.03268	998.463			253433
419	4.90658	4.94877	419	0.999671	4	1	2	4.93226	254.26			26264
420	4.9326	5	420	0.999873	6	1	2	4.96652	281.214			32144
421	4.95409	5.00551	421	0.998717	7	1	2	4.98516	280.907			53776
422	4.95941	5.12483	422	0.997288	21	1	2	5.02474	795.384			99189
423	4.96473	4.97537	423	0.999049	3	1	2	4.96938	251.151			26593
424	4.97006	5	424	0.987799	3	1	2	4.98238	284.271			60478
425	4.97006	5.21463	425	0.995843	33	1	2	5.07456	666.306			138268
426	4.97006	5.22054	426	0.996076	39	2	3	5.07746	869.384			273170
427	4.9807	5.04451	427	0.997848	6	1	2	5.01744	238.141			172624
428	4.9807	5.10129	428	0.998174	12	1	2	5.04066	256.239			98905
429	4.95941	5.02855	429	0.937306	5	1	2	4.99696	444.112			47423
430	4.98662	5.04451	430	0.999837	6	1	2	5.01476	254.224			27607
431	4.9807	5.0392	431	0.999289	4	1	2	5.01293	356.058			29033
432	5.01121	5.14609	432	0.980507	20	2;3	3	5.07672	907.331			116017
433	5.01712	5.15143	433	0.942832	10	1	2	5.08121	666.166			30040
434	5.03387	5.23672	434	0.999792	21	1	2	5.13632	281.213			35811
435	5.04451	5.18167	435	0.999843	9	1	2	5.11	212.915			162821
436	5.0392	5.68979	436	0.999969	80	1	2	5.48558	496.189			2640088
437	5.04982	5.09626	437	0.998924	4	1	2	5.06889	280.907			34019
438	5.06045	5.07169	438	0.999114	3	1	2	5.06622	251.151			24171
439	5.07169	5.09626	439	0.999893	3	1	2	5.08179	254.224			40010
440	5.10129	5.41754	440	0.997738	42	1	2	5.24082	253.902			91334
441	5.07913	5.11417	441	0.999868	4	1	2	5.09676	216.1			55180
442	5.09626	5.14079	442	0.992808	3	1	2	5.12071	444.112			59834
443	5.10129	5.27293	443	0.946626	14	1	2	5.17632	740.187			69487
444	5.13545	5.43199	444	0.999929	38	1	2	5.27217	238.141			207806
445	5.14079	5.38412	445	0.997689	18	1	2	5.24704	372.09			43573
446	5.15735	5.27885	446	0.999461	10	1	2	5.21903	251.151			32091
447	5.14609	5.22606	447	0.999628	6	1	2	5.18403	216.099			51996
448	5.14079	5.18167	448	0.999535	4	1	2	5.1597	254.26			30457
449	5.13545	5.38412	449	0.999948	31	1	2	5.26359	278.151			128211
450	5.16326	5.39477	450	0.999954	18	1	2	5.29285	280.908			41689
451	5.18167	5.23672	451	0.982651	5	1	2	5.21332	444.112			57290
452	5.17388	5.31097	452	0.997409	12	1	2	5.24532	256.239			107421
453	5.16326	5.22054	453	0.999387	3	1	2	5.18935	235.931			85950
454	5.20932	5.35139	454	0.999915	12	1	2	5.28323	254.26			30284
455	5.26143	5.27885	455	0.99986	3	1	2	5.26862	216.1			57847
456	5.26143	5.68533	456	0.999974	77	1	2	5.49508	518.171			1383568
457	5.26738	5.2897	457	0.999457	3	1	2	5.27753	212.915			148479
458	5.27885	5.32243	458	0.999293	5	1	2	5.29698	276.172			88922
459	5.28437	5.36284	459	0.986176	10	1	2	5.32232	444.111			60144
460	5.27293	5.33425	460	0.999935	7	1	2	5.29744	281.213			30270
461	5.30034	5.40541	461	0.996947	11	1	2	5.34712	295.136			146785
462	5.30568	5.45772	462	0.985712	16	1	2	5.37452	740.186			76145
463	5.32243	5.37349	463	0.999421	6	1	2	5.34091	212.915			168741
464	5.32835	5.41754	464	0.99978	7	1	2	5.36555	216.099			65751
465	5.31097	5.37349	465	0.99658	4	1	2	5.34036	226.229			33455
467	5.36284	5.43199	467	0.997681	3	1	2	5.40341	326.193			37888
468	5.4742	6.39168	468	0.999769	144	1	2	5.9557	218.167			171710
469	5.49027	5.63763	469	0.99548	10	1	2	5.5629	276.172			108147
470	5.4742	6.39168	470	0.999099	133	1	2	5.9607	220.146			117512
471	5.49621	5.5361	471	0.999147	3	1	2	5.52004	212.915			180171
473	5.54156	6.34612	473	0.997974	120	1	2	5.96321	253.902			87078
474	5.54156	5.55441	474	0.938813	3	1	2	5.54835	740.186			66166
475	5.5361	5.63763	475	0.999747	8	1	2	5.59035	280.908			41898
476	5.56035	5.70984	476	0.999995	15	1	2	5.6388	238.141			226845
477	5.55441	5.68533	477	0.996595	8	1	2	5.6128	226.229			43892
479	5.59342	6.20744	479	0.995851	63	1	2	5.88702	740.186			72827
480	5.59857	5.74463	480	0.975977	15	2	2	5.67566	908.316			115597
481	5.61882	5.65397	481	0.997381	3	1	2	5.63816	295.136			137801
482	5.63763	5.76097	482	0.993934	8	1	2	5.69982	444.111			67267
483	5.63025	5.68533	483	0.999701	6	1	2	5.65611	372.09			33898
484	5.63763	5.67578	484	0.99978	5	1	2	5.66114	326.193			39171
485	5.64825	5.69571	485	0.99632	4	1	2	5.67697	256.239			105339
486	5.64825	5.81121	486	0.999893	14	1	2	5.73804	216.1			55916
487	5.68533	6.34612	487	0.999686	76	1	2	6.02361	295.136			146553
488	5.67578	5.78853	488	0.992966	9	1	2	5.74684	254.26			26444
489	5.68087	5.80036	489	0.999979	8	1	2	5.74251	281.214			34401
490	5.68533	5.76611	490	0.999867	7	1	2	5.72391	280.907			41980
491	5.68979	5.74463	491	0.973177	4	2	3	5.71466	1007.43			72870
492	5.72662	6.35123	492	0.998596	64	1	2	6.06262	278.151			150595
493	5.73725	5.94225	493	0.998927	14	1	2	5.83687	256.239			96977
494	5.73725	5.79444	494	0.998738	6	1	2	5.76996	226.229			40091
495	5.76097	6.09397	495	0.982361	55	2	3	5.90733	984.411			420217
496	5.74463	6.34612	496	0.999962	76	1	2	6.05284	238.141			207513
497	5.72127	5.76611	497	0.999082	3	1	2	5.74944	212.915			147203
498	5.72662	5.90514	498	0.999666	15	1	2	5.81087	372.089			31469
499	5.75525	5.79444	499	0.994259	4	1	2	5.77653	276.172			86507
500	5.77503	6.01784	500	0.997623	33	1	2	5.89183	781.332			170601
501	5.80036	6.1758	501	0.999865	49	1	2	5.99802	280.908			46155
502	5.81656	5.83784	502	0.999597	4	1	2	5.827	212.915			123642
503	5.81121	5.99876	503	0.960186	25	2	3	5.89387	1022.36			120004
504	5.81121	5.91047	504	0.996895	8	1	2	5.85497	444.111			60806
505	5.82186	5.83784	505	0.998906	3	1	2	5.83143	254.26			24389
506	5.82719	5.89983	506	0.970798	4	1	2	5.86517	221.105			22467
507	5.87273	5.92683	507	0.999923	6	1	2	5.89406	326.193			33058
508	5.8816	5.94225	508	0.993795	7	1	2	5.91953	254.224			28657
509	5.87273	5.91047	509	0.999684	3	1	2	5.89222	222.056			36080
510	5.9211	6.08824	510	0.999775	15	1	2	5.99511	212.915			146285
511	5.92683	5.9892	511	0.993682	5	1	2	5.95803	276.172			82382
512	5.95905	6.2119	512	0.999998	32	1	2	6.10253	281.213			31271
513	5.94779	6.27395	513	0.99992	29	1	2	6.12665	216.1			52400
514	5.94225	6.08288	514	0.981377	13	1	2	6.01211	444.111			61572
515	5.98381	6.05487	515	0.997806	8	1	2	6.01912	372.09			34782
516	5.99431	6.01338	516	0.999857	3	1	2	6.00302	222.056			26904
517	5.99876	6.04895	517	0.997823	5	1	2	6.02666	256.239			102727
518	5.95905	6.00768	518	0.997608	4	1	2	5.98764	284.271			63708
519	5.9892	6.12132	519	0.935668	15	1	2	6.05548	254.26			34540
520	5.99876	6.02675	520	0.999997	3	1	2	6.01213	213.082			38244
521	6.0223	6.14206	521	0.999141	11	1	2	6.09058	276.172			93679
522	6.04013	6.18515	522	0.999827	18	1	2	6.10704	398.338			49236
523	6.05487	6.07224	523	0.991308	3	2	2	6.06408	795.384			30124
524	6.06078	6.08288	524	0.997657	3	1	2	6.07025	268.276			19286
525	6.05487	6.11687	525	0.996955	4	1	2	6.08421	284.271			74119
526	6.04895	6.06078	526	0.999683	3	1	2	6.05452	300.113			28190
527	6.07759	6.15389	527	0.999054	8	1	2	6.11481	251.151			27510
528	6.08824	6.35123	528	0.99849	21	1	2	6.21198	372.089			46572
529	6.07224	6.13024	529	0.999936	6	1	2	6.10913	222.056			39892
530	6.08824	6.22988	530	0.998915	12	1	2	6.15862	256.239			93509
531	6.10349	6.13616	531	0.971479	7	2	3	6.11853	795.384			32048
532	6.09397	6.15943	532	0.999376	7	1	2	6.13286	326.193			29687
533	6.09397	6.12578	533	0.996381	3	1	2	6.11012	213.082			34222
534	6.11687	6.13024	534	0.996323	3	1	2	6.12374	444.111			51102
535	6.15943	6.22988	535	0.992471	9	1	2	6.19885	254.26			27444
536	6.15943	6.2119	536	0.997738	6	1	2	6.18088	226.229			37714
537	6.16476	6.19407	537	0.98931	4	1	2	6.18238	444.111			52012
538	6.17008	6.2583	538	0.999952	11	1	2	6.2062	222.056			38427
539	6.18069	6.24725	539	0.998675	8	1	2	6.20469	276.172			100178
540	6.18961	6.2119	540	0.990463	3	1	2	6.1999	284.271			58048
541	6.20744	6.32977	541	0.999997	15	1	2	6.26905	280.908			41825
542	6.2119	6.37535	542	0.999946	12	1	2	6.2918	212.915			156383
543	6.23578	6.35568	543	0.979632	12	1	2	6.29261	444.112			63101
544	6.24171	6.35568	544	0.931739	12	1	2	6.29775	740.185			63762
545	6.24725	6.32977	545	0.999719	9	1	2	6.28461	281.214			26415
546	6.25257	6.32385	546	0.999735	8	1	2	6.28451	226.229			36150
547	6.27395	6.34612	547	0.998888	6	1	2	6.30429	256.239			102093
548	6.28481	6.32977	548	0.998147	4	1	2	6.3083	251.151			27946
550	6.31202	6.34612	550	0.999997	4	1	2	6.32489	216.1			50064
551	6.31202	6.34612	551	0.99899	4	1	2	6.32932	326.193			28908
553	6.29013	6.35123	553	0.998499	4	1	2	6.32012	276.172			87894
554	6.32385	7.03165	554	0.974104	93	2;3	3	6.57556	908.315			13032528
555	6.35568	6.87958	555	0.999897	94	1;2	2	6.56686	892.351			6219825
556	6.36332	6.44792	556	0.994402	6	3;2	2	6.42304	946.262			654788
557	6.36332	6.43006	557	0.998517	3	2	3	6.40963	930.297			388007
558	6.48219	6.54336	558	0.930073	4	2	3	6.51411	1778.68			899564
559	6.49991	6.66431	559	0.99782	9	1	2	6.55739	689.271			1587208
560	6.52596	6.58634	560	0.900959	3	2	2	6.55662	923.28			707189
561	6.64703	6.85455	561	0.988685	18	2	3	6.70664	946.262			702932
562	6.66431	6.74397	562	0.950742	5	2	3	6.69798	914.334			316101
563	6.6816	8.34595	563	0.998702	446	1	2	7.49179	234.161			556774
564	6.72096	8.32242	564	0.999937	242	1	2	7.52899	227.224			181896
565	6.72961	6.83745	565	0.999772	11	2	3	6.76319	930.297			326678
566	6.74397	8.32242	566	0.999894	469	1	2	7.49254	282.167			195242
567	6.76927	8.30281	567	0.999438	256	1	2	7.51641	327.997			535121
569	6.75261	8.29386	569	0.997118	253	1	2	7.46599	370.093			228999
570	6.74397	6.84906	570	0.987835	13	2	2	6.79425	957.399			171396
571	6.75261	7.83803	571	0.999972	220	1	2	7.25624	228.208			117712
572	6.77791	8.30281	572	0.999219	239	1	2	7.50202	390.276			175064
573	6.76927	8.30281	573	0.999502	252	1	2	7.51723	326			525885
574	6.75261	7.8804	574	0.999935	150	1	2	7.27835	233.944			236107
575	6.79519	7.79925	575	0.998324	165	1	2	7.30287	354.062			178216
576	6.78976	7.79183	576	0.999309	166	1	2	7.32226	218.166			164318
577	6.80382	8.28318	577	0.999817	255	1	2	7.49679	298.118			330399
578	6.78384	7.00428	578	0.996568	24	1	2	6.90372	329.993			159671
579	6.8207	7.04308	579	0.998148	26	1	2	6.93181	253.902			85849
580	6.80928	7.78654	580	0.999956	144	1	2	7.34313	220.146			107369
581	6.80382	7.29894	581	0.935204	43	1	2	7.04685	740.186			73255
582	6.83745	6.95969	582	0.999434	10	1	2	6.90292	254.26			32780
583	6.83745	6.89698	583	0.999856	5	1	2	6.86658	372.089			39888
584	6.84906	6.91298	584	0.999615	6	1	2	6.88324	639.247			90913
585	6.87366	7.00428	585	1	9	1	2	6.93439	238.141			187491
586	6.88554	6.98771	586	0.999829	8	1	2	6.9197	212.915			119769
587	6.87958	6.89698	587	0.999674	3	1	2	6.88779	226.229			34823
588	6.88554	6.94822	588	0.99919	5	1	2	6.91156	216.098			55773
589	6.83745	6.92938	589	0.99886	6	1	2	6.88341	280.907			34143
590	6.87366	6.99303	590	0.977308	10	1	2	6.93165	281.213			26445
591	6.87366	6.97627	591	0.999994	8	1	2	6.92756	295.136			144547
592	6.90767	6.95376	592	0.999928	6	1	2	6.93069	278.151			99008
593	6.90767	7.24541	593	0.996455	56	2	3	7.07924	1113.49			958732
594	6.90767	6.92938	594	0.999077	3	1	2	6.91857	326.193			21242
595	6.90234	6.95376	595	0.997118	5	1	2	6.93335	276.172			85003
596	6.90767	6.94083	596	0.99112	4	1	2	6.92563	444.111			67424
597	6.92938	6.95969	597	0.999524	3	1	2	6.94442	226.229			34902
598	6.93529	6.94822	598	0.999647	3	1	2	6.941	372.089			39150
599	6.93529	6.96561	599	0.996332	3	1	2	6.94864	256.239			80623
601	6.96561	7.02101	601	0.997884	5	1	2	6.99124	280.908			33877
603	6.98771	7.21118	603	0.996554	55	1;2	2	7.08139	910.411			229473
604	6.97627	7.16933	604	0.991952	30	2;3	3	7.07954	1151.44			156757
605	7.00996	7.12369	605	0.995702	8	2	3	7.06591	1135.47			63820
606	6.99834	7.17505	606	0.998822	12	1	2	7.08789	226.229			35285
607	7.04308	8.30281	607	0.99635	144	1	2	7.61145	329.994			168874
608	7.0602	7.10754	608	0.999167	4	1	2	7.07775	212.915			140067
609	7.0602	7.11837	609	0.999946	7	1	2	7.08739	697.3			90698
610	7.10754	7.8099	610	0.997853	118	1	2	7.46957	276.172			111504
611	7.08836	7.14108	611	0.994558	3	2	2	7.11417	908.314			27945
612	7.08836	7.8099	612	0.999847	118	1	2	7.43577	253.902			72141
613	7.10754	7.18906	613	0.99999	7	1	2	7.15866	278.151			121007
614	7.13514	7.21711	614	0.99991	10	1	2	7.18122	216.099			41835
615	7.12961	7.8099	615	0.999999	92	1	2	7.48376	238.141			213755
616	7.13514	7.16933	616	0.999937	3	1	2	7.14801	256.239			68627
618	7.14108	7.18014	618	0.982483	4	1	2	7.16159	444.112			53039
619	7.15847	7.20586	619	0.999886	5	1	2	7.18054	216.952			36108
620	7.18014	7.2286	620	0.999728	7	1	2	7.20222	212.915			111372
621	7.14108	7.20586	621	0.988892	7	1	2	7.17532	254.26			33802
622	7.14108	7.35397	622	0.999913	21	1	2	7.25689	281.213			32716
623	7.164	7.21711	623	0.998805	4	1	2	7.1897	280.908			26646
624	7.18014	7.30487	624	0.99858	13	1	2	7.23525	372.089			38830
625	7.18014	7.28806	625	0.999998	11	1	2	7.23978	326.193			27102
626	7.1846	7.28806	626	0.99996	9	1	2	7.23705	295.136			133093
627	7.19496	7.22268	627	0.999707	3	1	2	7.20778	256.96			47529
628	7.21711	7.32723	628	0.997542	10	1	2	7.27154	226.229			35349
629	7.22268	7.25098	629	0.999456	3	1	2	7.23731	356.058			29527
630	7.22268	7.36735	630	0.999977	19	1	2	7.2943	278.151			133645
631	7.22268	7.2671	631	0.976874	5	1	2	7.24923	444.111			49384
632	7.24541	7.27601	632	0.999951	4	1	2	7.26189	216.952			27015
633	7.26218	7.34952	633	0.999852	14	1	2	7.29884	216.099			48692
634	7.26218	7.31634	634	0.999478	4	1	2	7.28257	222.056			30097
635	7.25631	7.34952	635	0.999958	14	1	2	7.31041	533.232			110908
636	7.24541	7.25631	636	0.999428	3	1	2	7.25163	254.26			24046
638	7.28806	7.33871	638	0.999456	4	1	2	7.30701	235.931			98332
639	7.27601	7.35843	639	0.93702	10	2	3	7.3215	1241.58			63893
640	7.27601	7.33316	640	0.999085	5	1	2	7.30167	280.907			29149
641	7.29894	7.34444	641	0.99863	4	1	2	7.31934	256.96			62717
642	7.31634	7.48642	642	0.98979	29	2	3	7.40041	1069.5			154244
643	7.29894	7.33871	643	0.982413	6	2	3	7.31937	1038.51			80063
644	7.32189	7.46349	644	0.997483	13	1	2	7.403	295.136			133265
645	7.31042	7.36289	645	0.999245	4	1	2	7.34058	256.239			67485
646	7.28215	7.34952	646	0.999777	4	1	2	7.31713	276.918			35159
647	7.26218	7.30487	647	0.999973	3	1	2	7.28599	300.114			26961
648	7.33871	7.36289	648	0.995942	3	1	2	7.35298	866.421			42887
649	7.34444	7.35843	649	0.999521	3	1	2	7.35232	212.915			89388
650	7.34444	7.39473	650	0.999643	5	1	2	7.3674	372.089			27337
651	7.34952	7.69687	651	0.999409	34	1	2	7.5067	740.186			65864
652	7.35397	7.78654	652	0.994131	41	1	2	7.56596	444.112			72997
654	7.33316	7.37771	654	0.999214	3	1	2	7.3596	296.074			30184
655	7.3718	7.60631	655	0.998757	17	1	2	7.48744	256.96			73769
656	7.36735	7.50895	656	0.999999	10	1	2	7.43677	216.952			33954
657	7.39473	7.4287	657	0.990953	5	1	2	7.40879	866.422			83115
658	7.39473	7.79183	658	0.999059	35	1	2	7.5815	212.915			103954
659	7.3718	7.48642	659	0.999979	12	1	2	7.44151	216.1			58135
660	7.38326	7.42298	660	0.999402	3	1	2	7.40261	300.114			23025
661	7.38326	7.523	661	0.997015	13	1	2	7.46191	281.214			31169
662	7.40065	7.56268	662	0.999858	16	1	2	7.47467	254.26			33532
663	7.4287	7.51855	663	0.999233	8	1	2	7.47049	235.931			101468
664	7.43807	7.60631	664	0.949938	11	1	2	7.52019	221.105			20270
665	7.43361	7.79925	665	0.999995	48	1	2	7.60387	278.151			124405
666	7.41745	7.55675	666	0.999985	11	1	2	7.48411	326.193			33278
667	7.4287	7.56824	667	0.999936	13	1	2	7.50245	372.09			38827
668	7.50322	7.73632	668	0.997041	24	1	2	7.61513	295.136			147035
669	7.51855	7.56268	669	0.997953	5	1	2	7.53654	251.151			26661
670	7.52746	7.69151	670	0.999991	22	1	2	7.60911	216.1			50200
671	7.48642	7.53638	671	0.997813	4	1	2	7.51574	226.229			33927
672	7.5512	7.61077	672	0.997451	5	1	2	7.58004	256.239			60121
673	7.56268	7.74782	673	1	20	1	2	7.65229	216.952			39150
674	7.5512	7.57972	674	0.997668	3	1	2	7.57165	276.918			32694
675	7.5512	7.76504	675	0.999633	22	1	2	7.66291	281.213			34991
676	7.59672	7.65601	676	0.999538	6	1	2	7.62663	251.151			21081
677	7.60185	7.65044	677	0.99674	5	1	2	7.61884	280.908			23562
678	7.60631	7.63896	678	0.996961	4	1	2	7.62348	222.056			23806
679	7.60185	7.77568	679	0.998709	15	1	2	7.69157	372.09			36161
680	7.59672	7.62414	680	0.945761	3	3	2	7.61479	761.777			24616
681	7.61968	7.76504	681	0.999963	11	1	2	7.70334	326.193			25273
682	7.64452	7.78654	682	0.996407	10	1	2	7.70745	256.96			79976
683	7.65601	7.74188	683	0.99989	9	1	2	7.6946	276.918			36350
684	7.70666	7.75338	684	0.959099	4	3	3	7.72701	761.777			21424
685	7.7022	7.76504	685	0.999919	5	1	2	7.73744	222.056			30203
686	7.72003	7.77568	686	0.999989	7	1	2	7.74534	216.099			40971
688	7.73632	7.8099	688	0.909577	7	1	2	7.77149	740.186			61246
689	7.70666	7.76504	689	0.988947	4	1	2	7.73717	251.151			23102
691	7.75338	7.78121	691	0.989775	3	1	2	7.77042	226.229			26636
692	7.75912	8.02423	692	0.982466	44	2;3	3	7.8792	965.337			866096
693	7.78654	7.97326	693	0.977523	28	2	3	7.87756	949.372			343737
694	7.79925	7.94969	694	0.97554	13	2	3	7.87551	987.319			173949
695	7.76504	7.82053	695	0.918289	4	2	2	7.80321	940.42			63931
696	7.78121	7.85902	696	0.999504	4	1	2	7.81876	235.931			118119
697	7.87508	7.90483	697	0.993918	5	2	3	7.88638	1003.28			188291
698	7.8804	8.31028	698	0.999994	64	1	2	8.09729	228.208			112034
699	7.8989	7.92408	699	0.985831	3	4	3	7.90911	935.775			172961
700	7.87508	8.29386	700	0.997798	46	1	2	8.09869	276.172			97402
701	7.91073	7.99889	701	0.9995	5	1	2	7.94975	212.915			82503
702	7.92408	8.21105	702	0.999248	45	1	2	8.04451	569.242			2383796
703	7.91816	8.32242	703	0.998189	35	1	2	8.10818	233.943			155085
704	7.89347	8.29386	704	0.994913	50	1	2	8.11715	218.166			150605
705	7.91073	7.99889	705	0.999405	4	1	2	7.95524	235.931			143262
706	7.94251	8.14685	706	0.995993	33	1	2	8.03908	591.224			643011
707	7.94251	7.99152	707	0.99697	6	1	2	7.96441	256.959			99944
708	7.94251	8.02423	708	0.99671	5	1	2	7.98374	216.1			43571
709	7.96052	8.26685	709	0.999326	33	1	2	8.12149	354.061			138718
710	7.98072	8.29386	710	0.997435	45	1	2	8.14506	220.146			115431
711	7.97326	8.04135	711	0.983456	6	2	3	8.01141	1078.46			85717
712	7.97326	7.99152	712	0.999775	3	1	2	7.98121	216.952			48823
713	7.98621	8.08222	713	0.997454	16	1	2	8.03593	366.163			330292
714	7.98072	8.14151	714	0.993993	20	2	3	8.05373	607.188			411319
715	7.94969	8.15663	715	0.907463	12	1	2	8.05968	740.186			62534
716	7.98621	8.02995	716	0.988925	4	1	2	8.01436	226.229			34466
717	8.0136	8.07632	717	0.999995	5	1	2	8.04816	348.152			184418
718	8.0136	8.26132	718	0.999695	18	1	2	8.14151	281.213			34637
719	8.04135	8.28318	719	0.998289	25	1	2	8.16017	256.96			110886
720	7.98072	8.11381	720	0.987687	9	4	3	8.06581	935.775			128564
721	8.04681	8.27426	721	0.999747	18	1	2	8.17843	216.952			47527
722	8.09531	8.21105	722	0.999907	19	1	2	8.1605	238.141			196102
723	8.11381	8.22193	723	0.99986	15	1	2	8.16964	278.151			118666
724	8.10259	8.27426	724	0.999623	24	1	2	8.17707	253.902			52435
725	8.10259	8.11936	725	0.999636	3	1	2	8.10909	326.193			41077
726	8.11936	8.19979	726	0.989606	10	1	2	8.15666	444.111			54483
727	8.14151	8.20512	727	0.999643	8	1	2	8.1708	216.099			52177
728	8.14151	8.19421	728	0.998117	6	1	2	8.16772	276.918			48190
729	8.15663	8.19421	729	0.986306	4	4	3	8.17171	935.775			124241
730	8.14685	8.19421	730	0.979639	3	6	3	8.16746	1277.49			57358
731	8.15663	8.21105	731	0.999132	7	1	2	8.17881	212.915			59553
732	8.16109	8.18828	732	0.974173	3	3	2	8.16897	910.782			31391
733	8.12529	8.18828	733	0.99994	5	1	2	8.16157	222.056			25917
734	8.15218	8.20512	734	0.999524	6	1	2	8.17951	295.136			131487
735	8.15663	8.22193	735	0.996942	7	1	2	8.19077	326.193			28728
736	8.15663	8.19979	736	0.999981	4	1	2	8.17719	254.26			19498
737	8.15218	8.18828	737	0.999342	3	1	2	8.1734	235.931			125126
738	8.18236	8.32242	738	0.984975	30	2;1	3	8.25492	868.352			365083
739	8.17146	8.21105	739	0.983197	3	1	2	8.19044	251.151			18780
741	8.19979	8.26685	741	0.998645	6	1	2	8.24342	665.274			69179
742	8.20512	8.30281	742	0.988371	14	2	3	8.25372	906.299			215995
744	8.21105	8.26132	744	0.9975	3	1	2	8.2364	253.153			58195
745	8.18828	8.23587	745	0.979822	4	1	2	8.21556	226.229			23088
746	8.21105	8.28318	746	0.999579	11	1	2	8.25197	647.263			201571
747	8.18828	8.27426	747	0.982681	6	1	2	8.23806	740.186			54993
748	8.25205	8.26685	748	0.99947	3	1	2	8.26023	212.915			59366
749	8.26132	8.60151	749	0.99334	47	2;1	3	8.38481	998.463			22599346
750	8.26132	8.53179	750	0.999862	44	2;1	2	8.38398	795.384			9590976
751	8.26685	8.29386	751	0.981209	3	4	3	8.28106	935.775			107451
752	8.28318	8.49934	752	0.991361	24	2	3	8.3828	1020.45			1227985
753	8.26685	8.32242	753	0.97859	7	2	3	8.29977	1055.45			225329
754	8.27426	8.51551	754	0.98296	44	2;3	3	8.38471	1036.41			3191549
755	8.32242	8.40556	755	0.991357	4	2	3	8.36934	1074.36			365651
756	8.41619	9.50907	756	0.999326	238	1	2	8.95131	234.161			516128
757	8.43229	9.5017	757	0.999861	348	1	2	8.94801	282.167			201479
758	8.44859	8.54364	758	0.978675	17	2	2	8.48954	971.416			218104
759	8.44859	9.5017	759	0.967024	187	1	2	8.96546	227.224			191674
760	8.45604	9.47921	760	0.999671	176	1	2	8.94932	326			500957
761	8.46918	9.47921	761	0.999045	176	1	2	8.95456	327.997			495629
762	8.45604	9.18822	762	0.998547	137	1	2	8.81687	370.093			144607
763	8.45604	8.4751	763	0.991867	3	4	2	8.46386	935.774			130978
764	8.46918	9.18822	764	0.997107	95	1	2	8.82334	329.994			156399
765	8.4751	9.211	765	0.997652	136	1	2	8.83694	218.166			146371
766	8.4751	8.94885	766	0.997046	71	1	2	8.72212	354.061			128208
767	8.4751	8.52442	767	0.999994	9	1	2	8.49641	768.337			91880
768	8.4751	9.18822	768	0.999977	126	1	2	8.84003	220.146			103311
770	8.46918	9.22174	770	0.999965	150	1	2	8.85128	228.135			83205
771	8.48106	9.19887	771	0.999025	137	1	2	8.8406	298.118			300825
772	8.48846	8.53179	772	0.999977	5	1	2	8.51075	238.141			203864
773	8.45604	9.47921	773	0.999684	171	1	2	8.95461	390.276			162532
774	8.48106	8.58239	774	0.989078	11	2	2	8.53304	776.272			75217
775	8.49934	9.48808	775	0.991464	247	1;2	3	9.0395	868.352			135783
776	8.4751	9.17749	776	0.999282	94	1	2	8.86617	216.952			76572
777	8.44859	8.671	777	0.999977	22	1	2	8.55724	233.944			164337
779	8.48846	9.00573	779	0.998486	67	1	2	8.75014	253.902			47816
780	8.49397	9.21642	780	0.99893	92	1	2	8.83881	276.172			88381
781	8.46918	8.53179	781	0.900872	4	1	2	8.49867	740.187			58110
782	8.4751	8.83237	782	0.997306	42	1	2	8.67247	256.959			115481
783	8.49934	8.53179	783	0.999921	3	1	2	8.51713	256.239			39511
784	8.51996	8.58239	784	0.999977	6	1	2	8.5539	326.193			33526
785	8.52442	8.56021	785	0.968413	4	1	2	8.54494	444.111			44414
786	8.52442	8.70939	786	0.999924	24	1	2	8.62162	216.1			55563
787	8.51551	8.56021	787	0.985527	3	4	3	8.53767	935.774			101859
788	8.51044	8.74368	788	0.999738	25	1	2	8.64624	278.151			121400
789	8.53772	8.57171	789	0.998624	3	1	2	8.55559	276.918			52433
790	8.54957	8.84877	790	0.999489	31	1	2	8.69813	281.213			33122
791	8.57706	9.17749	791	0.99989	91	1	2	8.85458	238.141			202888
792	8.56021	8.63228	792	0.999372	7	1	2	8.58781	212.915			55806
793	8.57171	9.17749	793	0.987739	71	1	2	8.88675	740.186			70426
794	8.56021	8.64412	794	0.998652	6	1	2	8.60138	372.09			25347
795	8.56613	8.62079	795	0.999948	4	1	2	8.5952	295.136			118369
796	8.57171	8.6497	796	0.976553	7	6	3	8.61304	1277.49			51894
797	8.59706	9.5017	797	0.987917	119	4	2	9.0365	935.775			136065
798	8.60151	9.17749	798	0.999955	63	1	2	8.89337	276.918			67146
799	8.60151	8.61488	799	0.955091	3	3	3	8.61036	761.705			32302
800	8.61043	8.62671	800	0.999991	3	1	2	8.61714	326.193			29184
801	8.6497	8.66654	801	0.996031	3	1	2	8.65927	251.151			16443
802	8.66122	8.69011	802	0.999982	4	1	2	8.67509	295.136			127629
803	8.65563	8.68565	803	0.989015	4	1	2	8.66903	444.112			43902
804	8.66654	8.69902	804	0.999896	4	1	2	8.67931	212.915			48870
805	8.67545	8.69011	805	0.999829	3	1	2	8.68303	298.25			34735
806	8.66654	8.69902	806	0.999505	3	1	2	8.68677	256.239			31968
807	8.66654	8.7546	807	0.999943	8	1	2	8.70276	254.223			23534
808	8.671	8.69902	808	0.99989	3	1	2	8.68824	300.114			24427
809	8.69457	8.87105	809	0.98785	14	6	3	8.78457	1277.49			46306
810	8.71531	8.74368	810	0.999278	4	1	2	8.72596	233.944			98074
811	8.72091	8.74368	811	0.986109	4	1	2	8.73241	444.112			39036
812	8.72683	8.83237	812	0.978601	17	2	3	8.77837	996.447			85946
813	8.73776	8.82644	813	0.942813	19	2;3	3	8.78545	1370.54			73835
814	8.74368	9.03888	814	0.999885	28	1	2	8.88681	216.099			47781
815	8.72683	8.79219	815	0.999849	6	1	2	8.76244	326.193			35718
816	8.69902	8.77436	816	0.995831	6	1	2	8.73881	207.936			19607
817	8.72091	8.73242	817	0.989246	3	2	2	8.72735	906.299			42868
818	8.72683	8.79219	818	0.999424	5	1	2	8.76313	295.136			117335
819	8.74368	8.79219	819	0.999723	5	1	2	8.76602	235.931			116135
820	8.76544	8.77882	820	0.990671	3	2	2	8.77186	906.3			32330
821	8.76544	8.78773	821	0.992576	3	1	2	8.77678	226.229			20903
822	8.77436	8.87105	822	0.997564	13	1	2	8.82902	278.151			117729
823	8.79219	8.84877	823	0.999865	6	1	2	8.81168	212.915			51215
824	8.8096	8.91422	824	0.999218	9	1	2	8.86189	233.944			112981
825	8.8096	8.8666	825	0.994364	5	2	2	8.83222	906.299			61438
826	8.8096	8.84877	826	0.984225	4	1	2	8.82944	207.936			20963
827	8.78327	8.8666	827	0.967351	5	1	2	8.82726	221.105			22993
828	8.78327	8.85322	828	0.950076	4	1	2	8.81511	444.111			41038
829	8.82644	8.85768	829	0.978908	3	1	2	8.84671	251.151			21727
830	8.86214	9.11645	830	0.996616	28	1	2	8.9875	256.96			132057
831	8.85768	8.8918	831	0.999989	3	1	2	8.87465	326.193			29275
832	8.87997	8.90886	832	0.999991	4	1	2	8.89222	212.915			40156
833	8.8918	8.93102	833	0.991315	6	1	2	8.91292	281.214			26437
834	8.90329	8.97114	834	0.999978	11	1	2	8.93534	278.151			121132
835	8.90329	8.95331	835	0.983009	6	6	3	8.92672	1277.49			37270
836	8.89737	8.92014	836	0.99863	3	1	2	8.90994	665.274			22896
837	8.88587	8.92014	837	0.97617	3	1	2	8.90508	207.936			20451
838	8.90886	8.95331	838	0.981304	3	1	2	8.93281	444.111			43248
839	8.93102	8.94439	839	0.996214	3	1	2	8.93844	326.193			31731
840	8.92588	8.97704	840	0.956683	4	1	2	8.95074	221.104			21899
841	8.91422	8.96668	841	0.965671	4	3	3	8.9391	761.706			32453
842	8.92588	8.98297	842	0.999996	4	1	2	8.95613	295.136			131443
843	8.94885	8.95777	843	0.999749	3	1	2	8.95295	298.25			29389
844	8.93548	8.97704	844	0.998479	3	1	2	8.95628	226.229			23542
845	8.97114	9.01145	845	0.991333	5	2	2	8.98733	906.299			40162
846	8.97704	9.17749	846	0.99265	25	1	2	9.05978	354.062			118787
847	8.97704	9.03888	847	0.999945	9	1	2	9.00343	240.074			97486
848	8.95777	9.02551	848	0.997608	6	1	2	8.99144	281.214			30259
849	8.99981	9.02105	849	0.925029	3	1	2	9.00848	444.111			40211
850	9.00573	9.17749	850	0.998402	16	1	2	9.07269	278.151			136164
851	9.01145	9.04779	851	0.999986	6	1	2	9.0336	326.193			35607
852	9.00573	9.05948	852	0.999916	5	1	2	9.02828	233.944			104713
853	9.01145	9.04334	853	0.998538	3	1	2	9.02642	298.25			35059
854	9.02996	9.1654	854	0.998918	16	1	2	9.10605	253.902			40859
855	9.02996	9.07724	855	0.975751	5	6	3	9.05535	1277.49			39151
856	9.02996	9.04334	856	0.996563	3	1	2	9.03604	221.104			27788
857	9.03442	9.05948	857	0.99994	5	1	2	9.04533	295.136			132142
859	9.05394	9.07131	859	0.999998	3	1	2	9.06318	665.273			25966
860	9.06539	9.07724	860	0.997545	3	1	2	9.07369	222.005			26650
861	9.05948	9.17749	861	0.999989	12	1	2	9.11522	281.214			34653
862	9.05948	9.13428	862	0.99915	7	1	2	9.09878	372.089			27968
863	9.05948	9.12982	863	0.991913	7	2	3	9.09727	906.299			53335
864	9.08799	9.13874	864	0.99986	4	1	2	9.11364	212.915			38835
865	9.10132	9.11645	865	0.984433	4	1	2	9.1094	207.936			22526
866	9.11199	9.12982	866	0.950546	3	1	2	9.12143	221.105			20679
867	9.12091	9.13428	867	0.991925	4	1	2	9.12759	326.192			26839
868	9.11645	9.13874	868	0.999857	4	1	2	9.13039	206.069			53124
869	9.09576	9.14765	869	0.999997	4	1	2	9.12274	298.25			31338
870	9.09576	9.10132	870	0.999948	3	1	2	9.0975	216.097			34736
871	9.12091	9.17749	871	0.984446	5	6	3	9.14568	1277.49			44394
872	9.11199	9.14765	872	0.999419	4	1	2	9.13694	206.977			58215
874	9.15356	9.35478	874	0.999609	50	2;3	3	9.24965	1306.54			1582523
875	9.19887	9.30384	875	0.981027	9	2	3	9.23876	1344.48			163075
876	9.19887	9.33758	876	0.988172	21	2;3	3	9.26104	979.352			240305
877	9.2614	9.47921	877	0.999818	39	1	2	9.38199	228.135			80420
878	9.24045	9.47921	878	0.999748	33	1	2	9.37517	298.118			317734
879	9.28169	9.47921	879	0.9987	36	1	2	9.37789	218.166			149148
880	9.28712	9.44888	880	0.996503	18	1	2	9.36555	256.959			116374
881	9.2985	9.39031	881	0.97516	13	1	2	9.34178	740.187			55798
882	9.28169	9.48808	882	0.992395	33	1	2	9.37998	370.093			138407
883	9.28712	9.47391	883	0.992969	23	1	2	9.37316	354.061			109817
884	9.29304	9.47921	884	0.998042	27	1	2	9.38467	329.994			137786
885	9.28712	9.46842	885	0.999293	22	1	2	9.37874	276.172			85951
886	9.30916	9.47921	886	0.999409	23	1	2	9.38268	216.952			60446
887	9.31449	9.47391	887	0.977582	14	2	2	9.38263	906.3			73980
888	9.32573	9.47391	888	0.999843	16	1	2	9.39697	216.099			51168
889	9.31982	9.44888	889	0.99997	19	1	2	9.37847	253.941			40047
890	9.32573	9.44888	890	0.999194	17	1	2	9.38649	238.141			186154
891	9.31449	9.46842	891	0.999968	25	1	2	9.38949	220.146			90282
892	9.31982	9.44442	892	0.999207	12	1	2	9.3812	278.151			124075
893	9.31449	9.45627	893	0.999345	10	1	2	9.3878	233.944			99913
894	9.31982	9.4348	894	0.997837	10	1	2	9.37425	281.213			28520
895	9.33165	9.40368	895	0.945431	12	2	3	9.36542	1152.55			101288
896	9.33758	9.44888	896	0.960257	16	2	2	9.39672	975.356			97299
897	9.35478	9.42926	897	0.999618	10	1	2	9.38935	276.918			49653
898	9.32573	9.37161	898	0.944477	4	3	2	9.35148	761.706			37848
899	9.34329	9.3601	899	0.999522	3	1	2	9.35133	372.09			26333
900	9.3601	9.37694	900	0.99468	3	2	2	9.36822	931.458			64412
901	9.37161	9.39477	901	0.991361	3	6	3	9.38401	1277.49			42212
903	9.40814	9.5017	903	0.99919	13	2	3	9.4673	1036.37			351299
905	9.42926	9.44442	905	0.986822	3	6	3	9.43771	1277.49			38075
906	9.43997	9.48808	906	0.987929	6	2	3	9.46458	1020.41			117411
907	9.43997	9.47921	907	0.924971	5	1	2	9.4547	740.185			53586
908	9.4348	9.44888	908	0.999	3	1	2	9.44227	326.193			24040
909	9.44888	9.51977	909	0.993095	9	2	3	9.49684	1069.5			411900
913	9.5017	9.69156	913	0.989309	37	3;2	3	9.57835	1192.51			2478867
914	9.50907	9.64161	914	0.989753	8	2	3	9.56765	1176.55			1421034
915	9.51977	9.68584	915	0.999379	19	1	2	9.59202	720.265			3333826
916	9.5017	9.54631	916	0.987992	3	2	3	9.53704	736.23			844053
917	9.5017	9.564	917	0.991234	4	2	2	9.55434	933.474			930887
918	9.62406	9.67658	918	0.999857	7	2;1	3	9.64583	736.231			935844
919	9.64161	9.96428	919	0.998761	55	1	2	9.81583	234.161			498578
920	9.65047	9.86221	920	0.99952	33	2	3	9.73947	1113.49			1141169
921	9.65926	9.9732	921	0.998527	86	1	2	9.82816	282.167			173420
922	9.66792	9.96428	922	0.999293	49	1	2	9.82105	227.224			155031
923	9.67658	9.95063	923	0.998143	86	2;1	3	9.83472	868.352			184300
924	9.69156	9.94152	924	0.999847	25	1	2	9.83708	256.96			127132
925	9.68584	9.95063	925	0.999687	54	1	2	9.82314	228.135			78106
926	9.69156	9.95063	926	0.998482	45	1	2	9.82683	327.997			440113
927	9.69156	9.95063	927	0.999508	44	1	2	9.8316	390.276			150628
928	9.66792	9.96428	928	0.989749	42	4	2	9.82404	935.775			104271
929	9.68584	9.98214	929	0.998606	49	1	2	9.83486	325.999			481629
930	9.69156	9.96428	930	0.999469	30	1	2	9.83945	216.951			64250
931	9.68584	9.81523	931	0.999456	16	1;2	2	9.74611	910.411			285608
932	9.68584	9.79511	932	0.991714	19	3;2	4	9.74131	1151.43			649140
933	9.68584	9.95063	933	0.999029	45	1	2	9.83138	298.118			275340
934	9.68584	9.94152	934	0.962212	23	1	2	9.82543	740.187			64822
935	9.69895	9.95063	935	0.999951	29	1	2	9.81253	329.994			149192
936	9.69895	9.96428	936	0.999502	44	1	2	9.83494	218.166			158844
937	9.7096	9.94152	937	0.990997	38	1	2	9.83682	370.093			122327
938	9.72029	9.94152	938	0.99946	32	1	2	9.84208	220.146			92861
939	9.72619	9.76682	939	0.993942	6	2	3	9.74735	1135.47			67825
940	9.72029	9.93706	940	0.989455	34	2	3	9.84305	906.299			93816
941	9.72619	9.80933	941	0.999128	6	1	2	9.76775	235.931			120796
942	9.73804	9.76128	942	0.998562	3	2	3	9.75031	981.447			42457
943	9.73211	9.76682	943	0.998619	3	1	2	9.74648	216.099			46317
944	9.76128	9.77829	944	0.999695	3	1	2	9.77126	233.944			88855
945	9.77829	9.80041	945	0.985157	3	2	3	9.78788	1038.51			88322
946	9.76128	9.86221	946	0.998098	10	1	2	9.82022	253.902			49977
947	9.76128	9.81523	947	0.989228	8	2	3	9.78343	1170.51			86920
948	9.77829	9.79511	948	0.949599	3	2	3	9.78786	1241.59			66540
949	9.77829	9.88352	949	0.993634	33	2;3	4	9.82054	1434.63			158151
950	9.77829	9.78975	950	0.996343	3	1	2	9.78428	281.214			29521
951	9.78975	9.94152	951	0.993092	22	1	2	9.8684	354.061			89756
952	9.77829	9.85329	952	0.988976	12	2	3	9.81783	1363.56			72984
953	9.79511	9.93706	953	0.997754	20	1	2	9.86999	276.918			60794
954	9.79511	9.86666	954	0.999819	6	1	2	9.82693	326.193			26833
955	9.80487	9.96428	955	0.997289	17	1	2	9.87705	276.171			99248
956	9.82708	9.83801	956	0.986715	3	2	3	9.8317	1241.58			38287
957	9.83268	9.94152	957	0.966688	11	6	3	9.88681	1277.49			33908
958	9.84378	9.93706	958	0.99994	16	1	2	9.88873	238.141			174395
959	9.84883	9.91618	959	0.968492	11	2;3	3	9.88012	1184.53			88182
960	9.83268	9.94152	960	0.999752	12	1	2	9.89276	665.273			53846
961	9.82708	9.93706	961	0.999222	13	1	2	9.86925	281.213			31758
962	9.85329	9.88352	962	0.999586	5	1	2	9.86722	235.931			113030
963	9.86221	9.88352	963	0.943062	3	3	2	9.87069	761.705			26922
964	9.86221	9.88352	964	0.999719	3	1	2	9.87043	207.936			19126
965	9.86666	9.92755	965	0.999423	9	1	2	9.89833	216.099			52024
966	9.86666	9.91025	966	0.999755	4	1	2	9.8854	222.005			22376
967	9.84883	9.92755	967	0.999976	5	1	2	9.893	295.136			122685
968	9.84378	9.88352	968	0.944386	3	1	2	9.85774	742.184			26385
969	9.88352	9.9326	969	0.960713	5	2	3	9.90103	1154.53			40717
970	9.88798	9.93706	970	0.999321	6	1	2	9.90625	278.151			109751
971	9.88798	9.91618	971	0.999921	3	1	2	9.90108	298.25			32847
972	9.89244	9.94152	972	0.997186	10	1	2	9.91688	253.941			38881
973	9.89689	9.93706	973	0.998891	3	1	2	9.91488	326.193			21701
975	9.92178	10.4681	975	0.975994	80	3;2	3	10.06	979.351			20243726
977	9.9326	9.95063	977	0.999867	3	1	2	9.93977	217.976			50425
978	9.93706	10.1986	978	0.983927	49	2;1	3	10.0581	963.387			11700944
979	9.96428	9.98214	979	0.997111	3	2	3	9.97577	1001.33			538227
980	9.96428	10.1104	980	0.977548	10	2	4	10.0523	1920.76			2756927
982	10.1622	10.684	982	0.998472	84	1	2	10.4662	326			454575
983	10.1709	10.3672	983	0.996398	55	2;1	3	10.2529	868.352			2134248
984	10.1709	10.3066	984	0.991105	14	2	3	10.2202	1113.49			789574
985	10.1808	10.7261	985	0.999872	100	1	2	10.463	234.161			470329
986	10.1808	10.345	986	0.996293	24	2;1	3	10.2536	906.299			984678
987	10.1898	10.2538	987	0.998548	7	1	2	10.2166	910.411			250863
988	10.1898	10.2932	988	0.996302	8	2	3	10.2206	927.426			239138
989	10.1898	10.693	989	0.99919	89	1	2	10.4569	227.224			195025
991	10.1986	10.693	991	0.956033	82	4	2	10.4594	935.773			95764
992	10.1986	10.3539	992	0.999951	21	1	2	10.2565	665.274			884014
993	10.1986	10.3347	993	0.999521	19	1	2	10.2553	647.263			607177
994	10.1986	10.7614	994	0.999127	169	1	2	10.4876	282.167			187788
995	10.1986	10.3302	995	0.955468	14	3	3	10.2518	1597.76			424317
996	10.2254	10.2771	996	0.976581	9	2;3	3	10.2479	1394.68			302953
997	10.2431	10.3302	997	0.999997	4	1	2	10.2839	235.93			128652
998	10.2858	10.7173	998	0.998996	79	1	2	10.4916	327.997			441614
999	10.2932	10.7051	999	0.999836	78	1	2	10.4934	218.166			143987
1000	10.3006	10.6732	1000	0.996783	55	1	2	10.4937	329.994			141623
1001	10.2932	10.3731	1001	0.999001	9	1	2	10.3349	276.171			80845
1002	10.2932	10.6789	1002	0.999997	70	1	2	10.4929	216.951			73167
1003	10.2932	10.3249	1003	0.978037	4	3	4	10.3021	1397.68			93856
1004	10.2932	10.3672	1004	0.999739	9	1	2	10.3354	253.941			35741
1005	10.3006	10.684	1005	0.99927	76	1	2	10.4968	298.118			269787
1006	10.3006	10.693	1006	0.995733	76	1	2	10.4999	390.276			176471
1007	10.314	10.6789	1007	0.999881	69	1	2	10.5006	370.093			104158
1008	10.3195	10.6732	1008	0.998104	44	1	2	10.4955	354.062			92071
1009	10.3195	10.6656	1009	0.999609	58	1	2	10.4909	276.918			56506
1010	10.2932	10.693	1010	0.999962	72	1	2	10.4896	228.135			72557
1011	10.3066	10.6656	1011	0.999647	56	1	2	10.4867	216.099			77794
1012	10.3006	10.6732	1012	0.976052	44	1	2	10.4863	740.186			63774
1013	10.3066	10.6789	1013	0.999352	72	1	2	10.4989	220.146			86892
1014	10.3249	10.6732	1014	0.999193	31	1	2	10.4938	256.959			116004
1015	10.3006	10.4018	1015	0.999982	12	1	2	10.3574	326.193			39945
1016	10.27	10.3249	1016	0.996509	3	2	3	10.2969	1194.61			76696
1017	10.3249	10.345	1017	0.999624	4	1	2	10.3357	295.136			106328
1018	10.3249	10.6789	1018	0.999989	47	1	2	10.499	278.151			116567
1019	10.3249	10.3494	1019	0.949282	3	3	2	10.338	761.705			22629
1020	10.3347	10.6732	1020	0.99978	54	1	2	10.5233	238.141			190318
1021	10.3347	10.4343	1021	0.991173	21	2	3	10.3825	1242.53			148301
1022	10.3066	10.3672	1022	0.943716	6	6	3	10.3409	1277.49			32927
1023	10.3347	10.4018	1023	0.999865	6	1	2	10.3669	298.25			34053
1024	10.345	10.4565	1024	0.986357	36	2;3	3	10.398	1441.66			165710
1025	10.3539	10.4343	1025	0.987671	15	2	3	10.3911	1238.58			182504
1026	10.3539	10.4152	1026	0.990012	6	2	2	10.378	996.448			37846
1027	10.3613	10.6789	1027	0.997111	41	1	2	10.5154	281.214			29107
1028	10.3885	10.4197	1028	0.987186	4	1	2	10.4033	742.184			30905
1029	10.3929	10.4299	1029	0.999026	4	1	2	10.4127	213.082			33099
1030	10.3974	10.6656	1030	0.999231	46	1	2	10.5254	253.941			33828
1031	10.4063	10.6469	1031	0.998592	27	1	2	10.5369	276.172			77804
1032	10.4018	10.4681	1032	0.969746	6	3	2	10.4342	761.706			25043
1033	10.4433	10.5282	1033	0.989212	8	6	3	10.4795	1277.49			26662
1034	10.4241	10.4734	1034	0.996969	3	1	2	10.4451	207.936			22983
1035	10.4492	10.4823	1035	0.996764	7	2	3	10.4686	1184.53			68412
1036	10.4565	10.4779	1036	0.988557	3	1	2	10.4654	222.005			27762
1037	10.4625	10.5148	1037	0.998551	6	1	2	10.4882	207.125			20422
1038	10.4299	10.5002	1038	1	5	1	2	10.4707	295.136			115484
1039	10.4343	10.5673	1039	0.998755	15	1	2	10.5131	326.193			31197
1040	10.4823	10.6413	1040	0.999945	18	1	2	10.5686	298.25			35887
1041	10.4868	10.5673	1041	0.900776	12	2;3	3	10.5225	1427.65			51324
1042	10.4868	10.6732	1042	0.974277	18	2	3	10.5894	996.446			49570
1043	10.5148	10.5575	1043	0.977662	3	2	2	10.5359	979.351			21473
1044	10.5193	10.6469	1044	0.999826	10	1	2	10.5911	222.005			36137
1045	10.5238	10.5998	1045	0.983844	7	1	2	10.5695	226.975			16841
1046	10.5519	10.5998	1046	0.995042	6	1	2	10.5756	207.936			19522
1047	10.5386	10.5896	1047	0.999973	3	1	2	10.5673	300.114			23199
1048	10.5575	10.6221	1048	0.9997	6	1	2	10.5901	295.136			124947
1049	10.5575	10.5807	1049	0.951593	3	3	2	10.5694	761.707			28041
1050	10.5807	10.5953	1050	0.99991	3	1	2	10.5871	213.082			30044
1051	10.5896	10.6221	1051	0.998726	4	1	2	10.6044	221.105			18674
1052	10.5998	10.6656	1052	0.919169	7	6	3	10.6315	1277.49			29352
1053	10.5807	10.6522	1053	0.918708	7	1	2	10.6156	444.112			36065
1054	10.5953	10.6413	1054	0.999998	6	1	2	10.6144	326.193			30299
1055	10.5851	10.6132	1055	0.999999	3	1	2	10.5991	255.255			27498
1056	10.5953	10.628	1056	0.999272	3	1	2	10.6096	235.931			132938
1057	10.6413	10.9194	1057	0.996372	38	2;3	3	10.7488	1184.53			14349724
1058	10.6611	10.8363	1058	0.999885	38	1;2	2	10.7467	981.448			1583754
1059	10.6732	10.8363	1059	0.991881	30	3;2	3	10.7487	1222.47			1108207
1060	10.6732	10.8363	1060	0.986216	14	2	3	10.7478	1206.51			612084
1061	10.7051	10.7261	1061	0.995312	3	2	3	10.718	1260.42			211915
1062	10.7051	10.7261	1062	0.993582	3	2	3	10.7184	1244.46			234364
1063	10.7527	12.4873	1063	0.998253	513	2;1	3	12.0139	939.39			4496785
1065	10.7934	11.2482	1065	0.999981	77	1	2	11.0148	227.224			162521
1066	10.7934	14.4533	1066	0.99943	644	1	2	12.5719	234.161			524614
1067	10.786	11.1891	1067	0.978713	60	2	3	10.9626	977.337			187948
1068	10.8009	14.1915	1068	0.999747	1044	1	2	12.4949	282.167			203313
1069	10.8009	11.2572	1069	0.999968	74	1	2	11.0145	218.167			153081
1070	10.8115	10.9347	1070	0.986734	10	1	2	10.869	718.301			97621
1071	10.8308	11.2133	1071	0.999829	65	1	2	11.0121	220.146			84206
1072	10.8308	11.2133	1072	0.999543	70	1	2	11.0186	326			441398
1073	10.8201	11.3201	1073	0.998955	74	1	2	11.0264	327.997			430271
1074	10.8201	10.8767	1074	0.999842	13	1	2	10.8509	228.135			66974
1075	10.8308	11.2133	1075	0.999874	70	1	2	11.0153	298.118			260741
1076	10.8308	11.1997	1076	0.999461	51	1	2	11.0213	329.994			136282
1077	10.8308	11.2133	1077	0.999513	69	1	2	11.0168	390.276			150976
1078	10.8363	11.227	1078	0.997973	53	1	2	11.011	370.093			101957
1079	10.8115	11.227	1079	0.935797	49	4	2	10.9883	935.775			63937
1080	10.8363	11.2844	1080	0.998344	65	1	2	11.0351	216.951			79863
1081	10.8363	11.1203	1081	0.938164	25	1	2	10.989	740.186			57839
1082	10.8363	10.9391	1082	0.99966	9	1	2	10.883	281.213			30501
1083	10.8615	10.9587	1083	0.999981	14	1	2	10.9006	326.193			27363
1084	10.8441	11.2376	1084	1	51	1	2	11.0316	238.141			202821
1085	10.8115	11.0808	1085	0.994518	43	2	3	10.9865	996.447			700302
1086	10.8201	11.2572	1086	0.999736	62	1	2	11.1235	216.097			446092
1087	10.85	11.2133	1087	0.996926	43	1	2	11.0252	278.151			113157
1088	10.8615	10.9855	1088	0.998113	14	1	2	10.9221	354.061			76913
1089	10.85	11.227	1089	0.997313	52	1	2	11.0282	276.918			61658
1090	10.856	11.1426	1090	0.999794	36	1	2	11.0031	253.941			43230
1091	10.8722	10.9194	1091	0.999965	5	1	2	10.8933	207.936			27019
1092	10.8767	10.8901	1092	0.940665	3	1	2	10.8849	207.125			17243
1093	10.8669	10.9748	1093	0.997547	14	1	2	10.9153	256.96			108100
1094	10.8615	11.1831	1094	0.999086	24	1	2	11.0049	276.172			81888
1095	10.8812	10.9252	1095	0.999997	4	1	2	10.9014	295.136			112573
1096	10.8812	10.899	1096	0.986858	5	2	3	10.8904	456.271			54236
1097	10.899	10.9695	1097	0.976943	21	1;2	3	10.9347	925.374			92744
1098	10.9049	11.2376	1098	0.999609	50	1	2	11.0541	228.136			78633
1099	10.9302	10.9525	1099	0.999747	4	1	2	10.9411	298.25			37877
1100	10.9436	11.026	1100	0.992514	13	1	2	10.99	793.369			119664
1101	10.9525	11.0171	1101	0.997044	12	1	2	10.9851	775.358			105687
1102	10.9436	11.0119	1102	0.99784	7	2	3	10.9817	1034.39			108781
1103	10.9302	10.9695	1103	0.968642	3	1	2	10.9485	283.286			19301
1104	10.9642	11.0171	1104	0.992827	9	2	3	10.9843	978.436			102350
1105	10.9855	11.0497	1105	0.999137	5	1	2	11.0167	235.931			117997
1107	11.026	11.1336	1107	0.999993	11	1	2	11.0808	326.193			31021
1108	11.0438	11.0749	1108	0.999397	4	1	2	11.0611	298.25			31133
1109	11.0607	11.0749	1109	0.999507	3	1	2	11.0692	300.113			19010
1110	11.0394	11.1559	1110	0.998785	12	1	2	11.1065	354.062			66622
1111	11.0215	11.1247	1111	0.999498	10	1	2	11.078	281.213			27195
1112	11.0607	11.106	1112	0.951449	5	2	3	11.0893	1238.58			70673
1113	11.0808	11.1891	1113	0.999971	10	1	2	11.126	256.96			108373
1114	11.0705	11.1292	1114	0.988758	6	1	2	11.0925	718.3			53001
1115	11.0705	11.1559	1115	0.973075	17	3;2	3	11.1163	1441.66			67509
1116	11.0497	11.1247	1116	0.993508	5	1	2	11.0871	226.975			20394
1117	11.0394	11.1381	1117	0.998186	7	1	2	11.096	207.936			23975
1118	11.1005	11.1891	1118	0.9987	16	2	3	11.1422	1099.47			105101
1119	11.1292	11.147	1119	0.999231	3	1	2	11.1397	235.931			119208
1120	11.1336	11.162	1120	0.99881	4	1	2	11.1481	896.396			36774
1121	11.1381	11.2133	1121	0.999351	6	1	2	11.1794	239.172			68060
1122	11.1515	11.1695	1122	0.999648	3	1	2	11.1593	281.213			29396
1123	11.1426	11.1997	1123	0.999395	3	1	2	11.1719	217.976			77223
1124	11.1695	11.1997	1124	0.946725	3	1	2	11.1866	740.187			51642
1125	11.1695	11.3417	1125	0.995378	34	2;3	3	11.2587	1377.57			2550286
1126	11.1695	11.227	1126	0.974876	4	1	2	11.2019	718.299			64957
1127	11.1772	11.3417	1127	0.988764	25	2;3	3	11.2581	1313.57			1706272
1128	11.1997	11.2754	1128	0.951324	6	2	3	11.2378	1110.49			184047
1130	11.227	11.4639	1130	0.985857	33	2	3	11.3259	1184.53			4688672
1131	11.2133	11.2572	1131	0.970141	4	2	3	11.2416	1399.55			121926
1132	11.2133	11.2572	1132	0.981949	6	3;2	3	11.2383	1351.51			137470
1133	11.2133	11.2754	1133	0.98199	10	2;3	3	11.2521	1415.52			182593
1134	11.2754	11.4062	1134	0.999928	20	2;1	2	11.3237	981.448			799789
1135	11.2754	11.4062	1135	0.963425	32	2;3	3	11.3268	1222.47			389472
1136	11.2844	11.3903	1136	0.951376	11	2	3	11.3188	1206.51			302125
1138	11.3112	11.6887	1138	0.940085	41	4	3	11.4787	935.774			74831
1139	11.3038	13.9466	1139	0.999882	458	1	2	12.6383	227.224			192753
1140	11.3417	12.3714	1140	0.997959	143	1	2	11.8272	218.166			144069
1141	11.3548	12.3321	1141	0.996375	167	1	2	11.8434	298.118			279412
1143	11.3607	12.4738	1143	0.97641	175	2	3	12.1642	977.336			1892199
1144	11.3667	12.3321	1144	0.997876	175	1	2	11.8472	326			444947
1145	11.3667	12.2217	1145	0.998312	112	1	2	11.7925	329.994			160550
1146	11.3667	12.3321	1146	0.99827	173	1	2	11.8485	327.997			467165
1147	11.3667	12.3714	1147	0.999811	142	1	2	11.8634	228.135			85735
1148	11.3741	12.341	1148	0.99927	166	1	2	11.8544	390.276			152106
1149	11.3607	12.341	1149	0.999914	146	1	2	11.8676	216.952			82410
1150	11.3667	11.4526	1150	0.954102	8	2	3	11.4058	1050.39			147325
1152	11.3903	11.6963	1152	0.999543	44	1	2	11.5402	220.146			75130
1153	11.3667	11.7038	1153	0.996527	53	1	2	11.5488	276.918			66029
1154	11.3903	11.4337	1154	0.999643	11	1	2	11.4127	216.097			57774
1155	11.3849	11.7127	1155	0.970925	34	1	2	11.5639	740.187			58182
1156	11.3956	11.6432	1156	0.998114	18	1	2	11.5242	718.3			65618
1157	11.3849	11.8246	1157	0.99601	78	3;2	3	11.7167	1152.55			724138
1158	11.4116	11.5861	1158	0.999881	19	1	2	11.4994	281.213			30002
1159	11.4009	11.6887	1159	0.99987	24	1	2	11.5495	278.151			112752
1160	11.4175	11.4288	1160	0.999981	4	1	2	11.4217	253.941			29091
1161	11.4009	11.4793	1161	0.999701	7	1	2	11.4455	276.172			69345
1162	11.4288	11.4411	1162	0.998208	3	1	2	11.434	222.005			30841
1163	11.4411	11.5032	1163	0.99998	10	1	2	11.4715	238.141			175128
1164	11.4337	11.7038	1164	0.999905	32	1	2	11.5625	370.093			89796
1165	11.4288	11.5032	1165	0.999905	5	1	2	11.4601	298.25			42056
1166	11.4411	11.4694	1166	0.999465	3	2	3	11.451	1347.56			29495
1167	11.4526	11.563	1167	0.996826	20	2	3	11.5033	1134.45			226467
1168	11.4579	11.4837	1168	0.969665	4	2	3	11.4701	2119.71			29290
1169	11.4411	11.4926	1169	0.996292	6	1	2	11.4746	256.959			117119
1170	11.4288	11.5772	1170	1	11	1	2	11.5043	326.193			28006
1171	11.4694	11.5906	1171	0.992416	9	1	2	11.5237	354.061			74555
1172	11.4748	11.4971	1172	0.908195	3	2	3	11.485	2136.74			36476
1173	11.4694	11.6887	1173	0.995675	34	1	2	11.5729	216.099			74080
1174	11.4793	11.6887	1174	0.91118	20	1	2	11.5766	253.941			28625
1175	11.4971	11.5166	1175	0.991835	4	1	2	11.5065	283.287			27653
1176	11.4639	11.5219	1176	0.997888	4	1	2	11.4954	295.136			118815
1177	11.5166	11.5462	1177	0.952458	3	3	2	11.5262	761.706			21874
1178	11.511	11.6152	1178	0.995889	11	1	2	11.5631	276.172			74899
1179	11.5166	11.5683	1179	0.992459	5	2	2	11.5491	931.459			51903
1180	11.5219	11.6379	1180	0.97829	22	3;2	4	11.5782	1813.74			149663
1181	11.5352	11.5772	1181	0.996541	3	1	2	11.5594	256.959			106054
1182	11.563	11.6692	1182	0.940464	16	3	4	11.6083	1597.76			96677
1184	11.5817	11.6039	1184	0.996116	3	1	2	11.5939	283.286			27181
1185	11.5984	11.7038	1185	0.999987	13	1	2	11.6517	238.141			196622
1186	11.5906	11.731	1186	0.999363	22	2	3	11.6586	1313.57			194061
1187	11.5683	11.6326	1187	0.989695	4	2	3	11.6014	1394.69			58877
1188	11.6039	11.8025	1188	0.999908	28	2	3	11.7286	931.459			527279
1189	11.6152	11.6798	1189	0.931035	5	1	2	11.6457	255.255			31903
1190	11.6379	11.6692	1190	0.998508	3	1	2	11.6522	354.062			74185
1191	11.6211	11.6692	1191	0.999984	6	1	2	11.643	281.214			29128
1192	11.6152	11.6575	1192	0.995289	5	1	2	11.6307	326.193			30571
1193	11.6486	11.6963	1193	0.999261	4	1	2	11.6747	235.931			115763
1194	11.6636	11.7202	1194	0.998017	4	1	2	11.6921	276.172			80472
1195	11.6749	11.791	1195	0.9999	21	2	3	11.7339	949.47			295793
1196	11.6963	11.7688	1196	0.987137	11	2	3	11.7319	1476.64			105324
1198	11.7127	11.731	1198	0.995469	3	1	2	11.7243	746.39			108225
1199	11.731	11.8193	1199	0.980422	9	4	3	11.7691	935.775			69159
1200	11.7537	11.8512	1200	0.995909	13	2	3	11.7949	1136.55			126433
1201	11.7732	12.1409	1201	0.999805	40	1	2	11.9525	238.141			198973
1203	11.7732	12.3097	1203	0.999791	69	1	2	11.9983	220.146			103470
1204	11.7643	12.0433	1204	0.992138	29	1	2	11.9002	370.093			92365
1205	11.7594	12.2874	1205	0.979271	52	1	2	12.0327	740.187			64290
1206	11.7777	12.1137	1206	0.999867	46	1	2	11.9345	216.098			74904
1207	11.7836	11.9037	1207	0.996369	19	1	2	11.844	276.918			55308
1208	11.7969	12.1981	1208	0.999999	62	1	2	11.9427	278.151			121322
1209	11.8025	11.83	1209	0.990185	3	1	2	11.8184	354.061			61858
1210	11.8193	12.0114	1210	0.992934	17	1	2	11.9083	326.193			28343
1211	11.8246	11.8359	1211	0.999535	3	1	2	11.8306	249.992			29294
1212	11.8025	12.4453	1212	0.999451	90	1	2	12.2664	718.3			875129
1213	11.8084	11.8557	1213	0.990212	4	1	2	11.8316	255.255			29178
1214	11.8246	11.8468	1214	0.948088	5	3	3	11.8358	1620.7			40425
1215	11.814	11.9629	1215	0.999772	12	1	2	11.8972	281.214			27735
1216	11.8193	11.8646	1216	0.998703	4	1	2	11.8458	298.25			27608
1217	11.8468	11.8983	1217	0.997791	5	1	2	11.8696	256.96			117079
1218	11.8468	11.9238	1218	0.993416	9	1	2	11.8893	253.941			34713
1220	11.9037	11.948	1220	0.973667	8	2	3	11.927	1441.63			56970
1221	11.8868	11.9391	1221	0.998795	4	1	2	11.916	249.992			27065
1222	11.8928	12.2585	1222	0.999278	31	1	2	12.0814	276.172			77295
1223	11.9295	12.0336	1223	0.999953	21	1	2	11.9809	567.226			187314
1224	11.9347	12.3156	1224	0.997572	50	1	2	12.1181	276.918			69198
1225	11.9436	12.4542	1225	0.999998	76	1	2	12.3044	736.311			999395
1227	11.9968	12.0336	1227	0.915999	5	4	2	12.0141	935.775			45374
1228	12.0389	12.0611	1228	0.99996	3	1	2	12.0471	300.114			29157
1229	12.0433	12.0686	1229	0.990616	3	1	2	12.0583	253.941			24670
1230	12.0537	12.1409	1230	0.992199	7	1	2	12.0935	283.287			22610
1231	12.0611	12.0901	1231	0.99533	4	1	2	12.0801	354.061			63321
1232	12.0795	12.1782	1232	0.908103	6	1	2	12.1243	255.256			34072
1233	12.0686	12.0958	1233	0.983245	3	1	2	12.0837	226.975			20310
1234	12.0741	12.1007	1234	0.948756	3	4	2	12.0885	935.774			38406
1235	12.0795	12.1922	1235	0.999847	8	1	2	12.1279	281.214			29938
1236	12.0848	12.1468	1236	0.989815	7	1	2	12.1099	370.093			74102
1237	12.0958	12.1349	1237	0.996527	3	1	2	12.1121	326.193			25067
1238	12.1468	12.3097	1238	0.999899	19	1	2	12.2406	216.097			72278
1239	12.1556	12.2585	1239	0.937789	16	2	3	12.2047	1313.57			202101
1240	12.1725	12.2036	1240	0.938623	5	2	3	12.1871	1978.68			44687
1241	12.1782	12.2725	1241	0.999151	8	1	2	12.226	238.141			171266
1244	12.2636	12.3892	1244	0.999932	14	1	2	12.3533	533.232			449552
1245	12.2681	12.3097	1245	0.984431	4	1	2	12.2828	255.255			35663
1246	12.2636	12.2725	1246	0.970099	3	1	2	12.2681	253.941			28449
1247	12.2681	12.3246	1247	0.996911	8	1	2	12.291	329.994			136139
1248	12.2982	12.3246	1248	0.999868	3	1	2	12.3105	276.172			66936
1250	12.2814	12.3321	1250	0.900637	3	4	2	12.308	935.788			44293
1251	12.3246	12.4185	1251	0.972187	6	2	3	12.3709	1015.28			286784
1252	12.3321	12.4185	1252	0.984147	10	2;1	3	12.3771	961.371			269811
1253	12.4024	12.6412	1253	0.998617	54	3;2	3	12.4938	1384.6			3539376
1254	12.4024	12.5569	1254	0.965132	19	2	3	12.4945	1181.53			655915
1255	12.4272	13.9378	1255	0.999959	225	1	2	13.1771	216.951			80649
1256	12.4364	12.5676	1256	0.971123	35	2;3	3	12.4954	1422.55			347563
1257	12.4364	12.5461	1257	0.990812	13	1	2	12.5014	218.166			118180
1258	12.4364	12.5622	1258	0.960427	15	2	3	12.4916	1406.58			238869
1259	12.4453	13.1408	1259	0.999296	98	1	2	12.7944	228.135			72067
1260	12.4738	12.5228	1260	0.936633	5	2	3	12.498	1460.5			115013
1261	12.4542	13.9378	1261	0.998455	264	1	2	13.1879	327.997			428305
1262	12.4542	13.9378	1262	0.998839	264	1	2	13.1896	326			449673
1263	12.4616	13.9378	1263	0.999755	264	1	2	13.1885	390.276			154875
1264	12.4616	12.5676	1264	0.999252	7	1	2	12.5124	235.93			126440
1265	12.4616	12.5401	1265	0.925472	5	4	2	12.5046	935.774			48058
1266	12.5109	13.927	1266	0.998714	261	1	2	13.1967	298.118			271289
1267	12.5228	13.9378	1267	0.996755	176	1	2	13.1872	329.994			147636
1268	12.5283	12.7649	1268	0.99964	22	1	2	12.6468	276.171			63976
1269	12.5109	13.1552	1269	0.999607	90	1	2	12.8192	216.097			75383
1270	12.5461	12.8462	1270	0.939472	31	1	2	12.7069	740.187			53208
1271	12.5516	12.6368	1271	0.991325	13	2	3	12.5877	1164.5			83366
1272	12.5283	13.7553	1272	0.997957	210	1	2	13.1382	220.146			77156
1273	12.5283	13.9011	1273	0.997641	208	1	2	13.2016	276.918			77397
1274	12.5516	12.5676	1274	0.997408	3	1	2	12.5592	354.061			69643
1275	12.5516	13.2302	1275	0.999686	72	1	2	12.8873	326.193			38575
1276	12.5342	13.9193	1276	0.999649	209	1	2	13.2021	238.141			282584
1277	12.5622	13.0947	1277	0.99953	65	1	2	12.8199	370.093			74384
1278	12.5516	12.6189	1278	0.999903	5	1	2	12.5856	281.213			34528
1279	12.5622	12.7897	1279	0.999958	23	1	2	12.6706	255.256			32232
1280	12.5735	12.6739	1280	0.985393	20	2	3	12.61	1182.51			411393
1281	12.5569	13.0947	1281	0.999779	77	1	2	12.8359	278.151			119746
1282	12.581	12.6368	1282	0.999943	9	1	2	12.6103	218.166			112414
1283	12.5869	12.6947	1283	0.991604	11	1	2	12.635	253.941			29746
1284	12.6278	12.7324	1284	0.99968	12	1	2	12.677	222.005			51459
1285	12.6278	12.6457	1285	0.980607	3	1	2	12.6352	444.111			34249
1286	12.6021	12.6739	1286	1	5	1	2	12.643	226.975			25832
1287	12.6368	12.7591	1287	0.998911	13	1	2	12.6909	221.105			21344
1288	12.6412	12.6546	1288	0.999201	3	1	2	12.6471	295.136			127010
1289	12.6412	12.719	1289	0.999381	11	1	2	12.6831	298.25			34170
1290	12.6412	12.659	1290	0.998909	3	1	2	12.6491	219.174			23206
1291	12.6457	12.7649	1291	0.99937	11	1	2	12.708	281.214			24915
1292	12.6501	12.6635	1292	0.99772	3	1	2	12.6557	256.959			99375
1293	12.6412	12.6947	1293	0.998393	4	1	2	12.6692	266.136			34028
1294	12.6501	12.7368	1294	0.999934	6	1	2	12.6932	249.992			24540
1295	12.6816	12.8182	1295	0.999995	22	1	2	12.7533	218.167			119066
1296	12.6873	12.7235	1296	0.998922	4	1	2	12.6994	354.062			61395
1297	12.6947	12.7235	1297	0.984976	4	1	2	12.7064	210.198			22670
1298	12.7056	13.0295	1298	0.996429	31	1	2	12.8783	295.136			125256
1299	12.7235	12.8462	1299	0.905137	11	1	2	12.7857	253.941			30688
1300	12.7056	12.8048	1300	0.996372	8	1	2	12.7577	283.287			21247
1301	12.7235	12.8226	1301	0.99869	10	1	2	12.7605	226.975			23162
1302	12.7368	12.861	1302	0.997596	32	1;2	2	12.8057	696.269			194890
1303	12.7502	12.8182	1303	0.95069	11	3	3	12.7858	1820.78			57393
1304	12.7723	12.9747	1304	0.980838	16	1	2	12.8762	354.062			58744
1305	12.7841	12.8182	1305	0.988902	4	1	2	12.8009	742.184			32147
1306	12.8004	12.861	1306	0.997134	8	1	2	12.8266	276.172			63365
1307	12.8048	13.1003	1307	0.999891	34	1	2	12.9528	281.213			25967
1308	12.8182	12.836	1308	0.999346	3	1	2	12.8245	206.977			46351
1309	12.8182	12.8316	1309	0.999898	3	1	2	12.8236	298.25			31338
1310	12.8182	12.9445	1310	0.999633	14	1	2	12.8755	255.255			35557
1312	12.7782	12.8405	1312	0.999423	5	1	2	12.8098	249.992			30896
1313	12.8004	12.836	1313	0.998987	4	1	2	12.8236	260.123			43698
1314	12.8004	12.861	1314	0.998526	6	1	2	12.8356	219.174			25357
1315	12.8462	12.8853	1315	0.999981	5	1	2	12.8618	256.96			104833
1316	12.836	12.8987	1316	0.992006	5	1	2	12.8734	221.105			15982
1317	12.8551	12.9312	1317	0.999345	8	1	2	12.8975	222.005			45167
1318	12.8684	12.9578	1318	0.999977	9	1	2	12.9183	298.25			33338
1319	12.88	12.9312	1319	0.999542	6	1	2	12.9105	249.992			33084
1320	12.8853	13.1109	1320	0.950674	26	1	2	12.9896	740.187			51289
1321	12.8987	12.9312	1321	1	4	1	2	12.9134	254.224			19599
1322	12.8744	13.1275	1322	0.999993	34	1	2	12.9956	218.166			134418
1324	12.8898	12.9165	1324	0.99849	4	1	2	12.9025	260.123			30564
1325	12.8853	12.9254	1325	0.999037	4	1	2	12.901	248.962			23414
1326	12.88	12.9312	1326	0.924442	8	2	3	12.9065	1311.55			49255
1327	12.8987	12.9401	1327	0.99854	5	1	2	12.9196	283.287			23322
1328	12.9076	12.9747	1328	0.996336	7	1	2	12.934	276.172			59075
1329	12.921	13.0473	1329	0.996389	14	1	2	12.9879	253.941			27970
1330	12.9445	13.034	1330	0.996348	9	1	2	12.9853	256.96			97549
1331	12.9312	13.0548	1331	0.999722	11	1	2	12.9892	226.975			26382
1332	12.9638	12.9836	1332	0.999505	4	1	2	12.9739	222.005			40733
1333	12.9747	13.0763	1333	0.999722	9	1	2	13.0157	310.162			45278
1334	12.9694	12.997	1334	0.99948	4	1	2	12.9856	235.931			103103
1335	12.9881	13.0206	1335	0.998918	4	1	2	13.0018	255.255			39002
1336	13.0015	13.1216	1336	0.99938	9	1	2	13.0495	276.172			61898
1337	13.0117	13.0548	1337	0.999957	7	1	2	13.0337	222.005			44478
1339	13.0473	13.1606	1339	0.979631	15	2	3	13.1001	1457.53			111999
1340	13.0654	13.1408	1340	0.942374	12	2	3	13.0987	1441.56			75525
1341	13.071	13.1056	1341	0.980147	5	1	2	13.0876	354.061			60302
1342	13.0548	13.4317	1342	0.936341	35	1	2	13.2493	255.256			35009
1343	13.0399	13.1275	1343	0.998996	5	1	2	13.0838	221.104			23431
1344	13.1003	13.1886	1344	0.98955	15	2	3	13.1459	1216.51			90031
1345	13.1162	13.1552	1345	0.989376	4	1	2	13.1317	219.174			22547
1346	13.1216	13.1695	1346	0.998011	8	2	3	13.1425	810.348			68581
1347	13.1275	13.3908	1347	0.99689	30	1	2	13.261	370.093			65854
1348	13.1334	13.1695	1348	0.997513	4	1	2	13.1527	226.975			22265
1349	13.1408	13.364	1349	0.999439	31	1	2	13.252	281.213			28669
1350	13.1408	13.1975	1350	0.997608	6	1	2	13.1654	256.959			99429
1351	13.1408	13.2302	1351	0.999917	10	1	2	13.18	298.25			32452
1352	13.1275	13.7463	1352	0.999983	83	1	2	13.4312	278.151			113406
1353	13.1497	13.5043	1353	0.992725	40	1	2	13.3228	740.186			55884
1354	13.165	13.2109	1354	0.999029	8	1	2	13.1919	218.166			123196
1355	13.1739	13.8541	1355	0.999525	99	1	2	13.4781	228.136			72435
1356	13.1842	13.4496	1356	0.999988	32	1	2	13.3179	216.099			68142
1357	13.1739	13.202	1357	0.999773	3	1	2	13.1887	249.992			26957
1358	13.1797	13.2227	1358	0.999479	4	1	2	13.1996	222.005			37629
1359	13.1334	13.3206	1359	0.996984	16	1	2	13.2381	283.286			21772
1360	13.165	13.1739	1360	0.999466	3	1	2	13.1697	310.162			32792
1361	13.202	13.41	1361	0.999939	20	1	2	13.3145	295.136			109678
1362	13.2168	13.2302	1362	0.998364	3	1	2	13.2229	219.174			28463
1363	13.2227	13.3819	1363	0.987943	29	2	3	13.3128	1182.51			147944
1364	13.2302	13.2509	1364	0.983788	3	2	3	13.2378	1836.77			28073
1365	13.202	13.2598	1365	0.9742	6	3	3	13.2343	2093.95			34014
1366	13.2168	13.2746	1366	0.999789	4	1	2	13.2531	310.162			36705
1367	13.2465	13.2924	1367	0.997731	7	1	2	13.2664	256.96			102872
1368	13.2509	13.3596	1368	0.999987	19	1	2	13.3009	218.166			118079
1369	13.2598	13.2924	1369	0.999292	4	1	2	13.2762	235.931			114359
1370	13.2657	13.2746	1370	0.999784	3	1	2	13.2706	298.25			34234
1371	13.2465	13.2746	1371	0.999997	4	1	2	13.2637	210.198			26648
1372	13.2598	13.2835	1372	0.979675	4	1	2	13.2707	398.338			34217
1373	13.2657	13.336	1373	0.999327	6	1	2	13.2974	249.992			26078
1374	13.2657	13.3967	1374	0.999994	16	1	2	13.3248	326.193			35659
1375	13.2657	13.3073	1375	0.999858	5	1	2	13.2888	222.005			48533
1376	13.2746	13.3014	1376	0.999925	3	1	2	13.2866	226.975			23962
1377	13.2924	13.3315	1377	0.995634	4	2	3	13.3185	1164.5			60643
1378	13.3147	13.4041	1378	0.99953	13	1	2	13.3607	298.25			36106
1379	13.3147	13.364	1379	0.999559	4	1	2	13.3424	310.162			36699
1380	13.3462	13.3819	1380	0.999513	5	1	2	13.3662	276.172			73600
1381	13.3551	13.4807	1381	0.909091	33	3;2	4	13.4118	1921.86			92606
1382	13.364	13.3967	1382	0.999854	5	1	2	13.3805	249.992			29063
1383	13.3462	13.3908	1383	0.997665	5	1	2	13.3676	226.975			23581
1384	13.3729	13.4156	1384	0.999898	5	1	2	13.3951	253.941			23011
1385	13.3908	13.6238	1385	0.999692	27	1	2	13.5	218.167			122572
1386	13.3819	13.4041	1386	0.958403	3	1	2	13.3921	444.112			31971
1387	13.3774	13.3967	1387	0.999977	4	1	2	13.3844	219.174			37270
1388	13.3908	13.4407	1388	0.921542	5	3;2	3	13.414	1930.82			44315
1389	13.41	13.4362	1389	0.999342	3	1	2	13.4198	281.214			31111
1390	13.4156	13.5785	1390	0.999133	56	2;1	2	13.4948	673.338			607238
1392	13.3967	13.4317	1392	0.989907	3	1	2	13.4179	283.286			16639
1394	13.4362	13.4496	1394	0.997872	3	1	2	13.4439	326.193			24500
1395	13.4156	13.6009	1395	0.992988	14	1	2	13.5027	276.172			68182
1396	13.4936	13.779	1396	0.999944	32	1	2	13.6269	216.097			62541
1397	13.5098	13.5249	1397	0.97392	3	1	2	13.5171	370.093			43651
1398	13.5155	13.5844	1398	0.999983	8	1	2	13.5463	255.256			32008
1399	13.5293	13.7463	1399	0.99991	24	1	2	13.6541	326.193			29577
1400	13.5383	13.7463	1400	0.957826	17	1	2	13.6254	283.287			21405
1401	13.5293	13.6009	1401	0.999986	7	1	2	13.5719	281.213			29981
1402	13.5442	13.6149	1402	0.999852	6	1	2	13.5806	298.25			34175
1403	13.5293	13.6194	1403	0.99722	7	1	2	13.5901	253.941			24494
1404	13.5338	13.5611	1404	0.968618	3	3	4	13.5468	2164.98			31183
1405	13.5557	13.6372	1405	0.99905	8	1	2	13.5963	370.093			65274
1406	13.5726	13.606	1406	0.999881	3	1	2	13.5854	256.96			95541
1407	13.5442	13.7104	1407	0.988647	14	1	2	13.6368	740.186			46539
1409	13.5726	13.5844	1409	0.998097	3	1	2	13.5782	226.975			21790
1410	13.567	13.6283	1410	0.999744	7	1	2	13.6079	222.005			43702
1411	13.5611	13.6194	1411	0.99454	4	1	2	13.5879	354.062			56440
1412	13.6009	13.6372	1412	0.984218	5	1	2	13.6133	221.105			18068
1413	13.606	13.706	1413	0.999845	12	1	2	13.6529	295.136			112666
1414	13.6194	13.7283	1414	0.909585	20	3	4	13.6731	1921.86			87500
1415	13.6283	13.6926	1415	0.986234	10	2	3	13.665	1389.57			49890
1416	13.6283	13.6971	1416	0.998909	7	1	2	13.6637	219.174			28960
1417	13.6327	13.7238	1417	0.997899	15	2	3	13.6756	1093.46			113523
1418	13.6327	13.6817	1418	0.996973	6	1	2	13.6575	260.123			40804
1419	13.6327	13.7463	1419	0.999957	13	1	2	13.6895	255.255			36537
1420	13.6461	13.6971	1420	0.999995	4	1	2	13.6673	249.992			27028
1421	13.6621	13.7193	1421	0.999883	6	1	2	13.693	298.25			32625
1422	13.6739	13.7238	1422	0.915849	7	1	2	13.6996	253.941			24670
1423	13.6506	13.7735	1423	0.999852	14	1	2	13.7216	218.166			125816
1424	13.6565	13.6817	1424	0.997831	4	1	2	13.6702	256.959			88455
1425	13.6565	13.8345	1425	0.994872	13	1	2	13.7531	276.172			81494
1426	13.668	13.7463	1426	0.998044	7	1	2	13.7081	370.093			64924
1427	13.6565	13.706	1427	0.920806	5	3	3	13.6876	1978.88			29885
1428	13.6283	13.7372	1428	0.998359	15	1	2	13.6852	281.213			26351
1429	13.6416	13.6971	1429	0.989952	4	1	2	13.6683	254.224			16256
1430	13.6506	13.6926	1430	0.999314	3	1	2	13.669	235.931			100351
1431	13.668	13.7149	1431	1	4	1	2	13.6941	222.005			46089
1432	13.6873	13.7553	1432	0.99935	7	1	2	13.718	226.975			26943
1433	13.6971	13.8815	1433	0.96998	59	2;3	4	13.7855	1850.82			637300
1434	13.706	13.8482	1434	0.976525	23	2	3	13.7834	1647.74			287035
1435	13.7238	13.779	1435	0.938488	6	2	3	13.7495	1662.7			45347
1436	13.7283	13.8118	1436	0.973346	17	2;3	3	13.7742	1888.77			89407
1437	13.7372	13.8011	1437	0.910508	7	2	3	13.7789	1872.8			59265
1438	13.7553	13.8904	1438	0.956192	10	1	2	13.8284	740.186			56485
1439	13.7896	13.8011	1439	0.999084	3	1	2	13.7957	235.931			92719
1440	13.8064	13.823	1440	0.999156	3	1	2	13.8155	283.287			23506
1441	13.8118	14.1915	1441	0.999375	30	1	2	13.9978	218.166			147398
1442	13.8118	13.9193	1442	0.999379	12	1	2	13.8506	220.146			66286
1443	13.8289	13.86	1443	0.998362	4	1	2	13.8418	216.099			38874
1444	13.8345	13.8762	1444	0.999728	4	1	2	13.8501	278.151			100891
1445	13.8289	13.9555	1445	0.982169	31	3;2	3	13.8873	1907.81			244727
1446	13.8118	13.8482	1446	0.999733	4	1	2	13.8304	298.25			31424
1447	13.8171	13.8541	1447	0.998059	3	1	2	13.8375	255.255			30373
1448	13.8482	13.8815	1448	0.980534	6	2;3	3	13.8675	1945.75			54730
1450	13.8541	13.9011	1450	0.989181	7	2	3	13.8778	1704.73			67268
1451	13.8709	13.8815	1451	0.999792	3	1	2	13.8761	276.172			57550
1453	13.8762	13.9645	1453	0.969104	15	3;2	3	13.9229	1792.78			228034
1454	13.8762	13.9193	1454	0.999363	3	1	2	13.8934	326.193			33415
1456	13.9118	14.0691	1456	0.999977	22	1	2	13.9839	647.264			1628744
1457	13.9193	14.0745	1457	0.999804	27	2;1	3	13.9846	888.289			1247087
1458	13.8815	13.9378	1458	0.999463	5	1	2	13.911	228.136			66944
1459	13.8709	13.9011	1459	0.952089	3	2	3	13.8859	1817.7			43436
1460	13.9466	14.0745	1460	0.952156	10	3	4	13.9979	2036.88			157986
1461	13.9645	14.009	1461	0.999171	6	1	2	13.9812	872.324			231381
1462	13.9555	13.9879	1462	0.960457	3	3	3	13.972	1921.86			122629
1463	13.9805	14.1337	1463	0.997234	33	3;2	4	14.0419	1992.9			435780
1464	14	14.1825	1464	0.999995	25	1	2	14.0849	227.224			169565
1465	14.0182	14.158	1465	0.999886	19	1	2	14.0868	326			452129
1466	14.0269	14.158	1466	0.998566	19	1	2	14.0859	327.997			381871
1467	14.0343	14.158	1467	0.992974	18	1	2	14.0917	390.276			166244
1468	14.0417	14.0911	1468	0.957408	9	4;3	4	14.0669	2321.08			66468
1469	14.0531	14.1278	1469	0.94829	14	2;3	3	14.0858	1898.75			53394
1470	14.0476	14.1459	1470	0.999718	9	1	2	14.0899	281.214			32693
1471	14.009	14.1717	1471	0.999985	20	1	2	14.095	238.14			439087
1472	14.0417	14.158	1472	0.999982	18	1	2	14.0937	298.118			249641
1473	14.0343	14.158	1473	0.999235	15	1	2	14.0964	329.994			131729
1474	14.0343	14.1278	1474	0.999978	8	1	2	14.0805	276.172			68130
1475	14.009	14.158	1475	0.999971	13	1	2	14.0871	228.135			85530
1476	14.0531	14.158	1476	0.999253	14	1	2	14.1023	276.918			58103
1477	14.0585	14.1163	1477	0.980576	5	3	3	14.0815	2118			52018
1478	14.0585	14.1459	1478	0.999162	13	1	2	14.1017	220.146			77199
1479	14.0638	14.1337	1479	0.999305	5	1	2	14.0989	278.151			105042
1480	14.0417	14.1825	1480	0.999685	13	1	2	14.1138	216.951			66117
1481	14.0745	14.158	1481	0.999283	6	1	2	14.118	216.099			46216
1482	14.0745	14.1337	1482	0.999693	4	1	2	14.1049	326.193			27970
1483	14.0638	14.158	1483	0.983946	8	1	2	14.1155	740.185			51561
1484	14.0745	14.1337	1484	0.947702	12	1	2	14.1099	255.255			31040
1485	14.0911	14.1337	1485	0.998778	4	1	2	14.1135	298.25			31624
1486	14.1163	14.1915	1486	0.953525	8	2	3	14.1654	1382.59			144697
1489	14.1103	14.1337	1489	0.999159	3	1	2	14.1209	222.005			56819
1490	14.0804	14.158	1490	0.999255	4	1	2	14.1182	235.931			104045
1491	14.0988	14.1278	1491	0.999782	4	1	2	14.1104	249.992			27891
1492	14.1044	14.1459	1492	0.997411	3	1	2	14.1203	260.123			86831
1493	14.0988	14.1337	1493	0.983789	3	1	2	14.1183	253.941			22373
1494	14.1459	14.2702	1494	0.97823	15	3;4	5	14.2064	2044.87			237625
1495	14.158	14.3093	1495	0.983183	12	2	4	14.2223	1744.71			284121
1496	14.1459	14.3335	1496	0.978873	22	2;3	3	14.2219	1760.67			418656
1500	14.1717	14.2503	1500	0.932733	3	3	3	14.2131	1841.79			112671
1501	14.2358	14.4533	1501	0.999283	29	1	2	14.3497	227.224			171922
1502	14.2609	14.2924	1502	0.999762	5	1	2	14.2766	218.166			154296
1503	14.2702	14.4303	1503	0.99998	23	1	2	14.3491	298.118			265354
1504	14.243	14.4696	1504	0.999299	51	1	2	14.3622	282.167			222082
1505	14.2791	14.4167	1505	0.997811	22	1	2	14.3475	326			436227
1506	14.2791	14.4411	1506	0.999923	25	1	2	14.3577	238.141			411171
1507	14.2791	14.4411	1507	0.999159	26	1	2	14.3548	327.997			427245
1508	14.2865	14.3893	1508	0.949676	18	3;2	4	14.3287	2036.88			110279
1509	14.2924	14.3759	1509	0.964125	25	2;3	3	14.3309	1880.8			128689
1510	14.2865	14.406	1510	0.998244	14	1	2	14.3571	276.918			66909
1511	14.2979	14.4167	1511	0.997344	14	1	2	14.3633	329.994			137746
1512	14.3038	14.4303	1512	0.996607	18	1	2	14.3697	390.276			159291
1513	14.2791	14.4303	1513	0.999837	19	1	2	14.3576	216.952			79778
1514	14.3146	14.4411	1514	0.999899	14	1	2	14.3725	228.135			59201
1515	14.322	14.3496	1515	0.998822	4	1	2	14.3383	283.199			28980
1516	14.3146	14.3818	1516	0.999996	8	1	2	14.3566	220.146			65501
1517	14.3446	14.406	1517	0.938653	5	1	2	14.3709	740.186			46097
1518	14.3388	14.406	1518	0.999611	5	1	2	14.3696	216.099			66585
1519	14.3093	14.4001	1519	0.999967	6	1	2	14.3588	255.255			33772
1521	14.328	14.4533	1521	0.999324	13	1	2	14.3889	218.167			132266
1522	14.3388	14.3893	1522	0.999577	4	1	2	14.3617	235.931			103268
1523	14.3541	14.4696	1523	0.999632	16	2	3	14.4115	978.437			531367
1524	14.3644	14.4533	1524	0.999515	12	1	2	14.4061	775.358			184725
1526	14.3759	14.406	1526	0.999263	3	1	2	14.392	276.172			51914
1527	14.4001	14.6218	1527	0.983852	58	2;3	5	14.5026	1921.86			5071899
1528	14.4167	14.5976	1528	0.978173	24	2	3	14.5006	1718.78			1235499
1529	14.4303	14.5976	1529	0.933488	31	3;2;4	3	14.5006	1959.8			653896
1530	14.4303	14.5274	1530	0.977123	10	4;3	5	14.471	2514.12			213948
1531	14.4533	14.563	1531	0.977083	12	2;3	3	14.5026	1943.84			328646
1532	14.5187	14.7919	1532	0.997875	41	1	2	14.6631	234.161			466983
1534	14.5274	14.6724	1534	0.999955	18	1	2	14.5959	238.141			473987
1535	14.5423	14.7919	1535	0.999991	33	1	2	14.661	227.224			154875
1537	14.5274	14.7919	1537	0.99921	47	1	2	14.6552	282.167			190985
1538	14.5482	14.7919	1538	0.994239	22	1	2	14.6587	218.166			156294
1539	14.5556	14.6575	1539	0.999546	15	1	2	14.5995	327.997			411915
1540	14.5556	14.6575	1540	0.998916	14	1	2	14.6027	325.999			428037
1541	14.563	14.6218	1541	0.999979	9	1	2	14.5916	216.952			72916
1542	14.5738	14.6398	1542	0.989099	10	1	2	14.6048	390.275			146505
1543	14.5738	14.6996	1543	0.99896	29	2;3	4	14.635	1880.8			254392
1545	14.563	14.6165	1545	0.999618	5	1	2	14.5968	298.118			255660
1546	14.563	14.6575	1546	0.999796	9	1	2	14.6144	329.994			129253
1547	14.5791	14.6165	1547	0.999594	4	1	2	14.5957	220.146			60775
1548	14.5738	14.6575	1548	0.999861	12	1	2	14.6112	228.136			67409
1549	14.5791	14.6165	1549	0.937902	6	2	3	14.601	1898.75			54803
1550	14.5791	14.6165	1550	0.998278	4	1	2	14.5994	255.255			37671
1551	14.611	14.7648	1551	0.991033	26	3;2	4	14.669	1978.84			358341
1552	14.5976	14.6398	1552	0.979773	3	2;3	3	14.6226	1918.74			51104
1553	14.611	14.6486	1553	0.976092	4	2	3	14.6343	1677.72			60246
1554	14.6218	14.7737	1554	0.928034	34	3;2	4	14.6935	1888.73			323858
1555	14.6218	14.7648	1555	0.982237	16	2	3	14.697	1872.77			301557
1557	14.6486	14.6635	1557	0.960699	3	3	3	14.6574	2016.79			68661
1558	14.6486	14.7426	1558	0.946818	9	2	3	14.697	1926.68			110814
1559	14.7132	14.7597	1559	0.999577	4	1	2	14.7391	228.136			70843
1560	14.719	14.7919	1560	0.999519	8	1	2	14.7517	216.952			69897
1561	14.719	14.7919	1561	0.999421	10	1	2	14.7543	327.997			436001
1562	14.7338	14.7919	1562	0.99983	9	1	2	14.7608	238.141			433700
1563	14.7426	14.7737	1563	0.998548	5	1	2	14.7577	276.918			47445
1564	14.7426	14.7919	1564	0.999734	6	1	2	14.7645	326			395263
1565	14.7338	14.7648	1565	0.999952	3	1	2	14.7505	298.118			260808
1566	14.7541	14.7737	1566	0.999963	3	1	2	14.764	390.276			133708
1569	14.7792	14.9189	1569	0.978427	25	4;3;2	4	14.8482	2115.9			1445193
1572	14.7792	14.7919	1572	0.989097	3	1	2	14.7862	692.794			94658
1573	14.7792	14.8573	1573	0.917392	8	3;2	5	14.8432	2099.94			548748
1574	14.8041	14.892	1574	0.974685	8	3	5	14.8527	1912.82			670158
1577	14.901	15.1143	1577	0.991313	42	2;3	3	14.9766	1831.71			1966524
1578	14.9099	15.1098	1578	0.9916	22	2	3	14.9739	1815.75			1505843
1579	14.9365	15.0333	1579	0.964878	9	2	3	14.9752	1853.69			550262
1580	14.9365	15.0496	1580	0.903574	8	2	3	14.9775	1869.66			377227
1581	14.9541	14.9981	1581	0.966776	3	2	3	14.9722	1628.63			429042
1582	15.0333	15.1985	1582	0.999733	24	1	2	15.1152	238.141			847739
1583	15.0422	15.1985	1583	0.998906	27	1	2	15.1192	234.161			491419
1584	15.0422	15.1849	1584	0.98846	22	3;2	4	15.1043	2229.93			330129
1585	15.0496	15.1985	1585	0.999983	22	1	2	15.1264	227.224			163339
1586	15.0677	15.1849	1586	0.996823	16	1	2	15.1336	390.276			143560
1587	15.0154	15.1849	1587	0.995749	37	1	2	15.1229	282.167			173503
1588	15.0422	15.1336	1588	0.9998	7	1	2	15.083	218.167			130894
1589	15.0422	15.1985	1589	0.997443	15	1	2	15.1231	216.952			84710
1591	15.0677	15.1985	1591	0.999143	20	1	2	15.1308	326			451860
1592	15.0333	15.1985	1592	0.998478	21	1	2	15.1255	327.997			471476
1593	15.0885	15.1623	1593	0.999996	7	1	2	15.1293	276.918			60114
1594	15.1047	15.1336	1594	0.987308	3	2	3	15.1175	1385.59			51645
1595	15.1098	15.1985	1595	0.999657	12	1	2	15.1474	298.118			259356
1596	15.1098	15.1697	1596	0.998255	5	1	2	15.1304	255.167			100119
1597	15.1047	15.139	1597	0.946652	5	2	3	15.1163	1093.46			120620
1598	15.1098	15.1849	1598	0.997628	11	1	2	15.1466	329.994			137985
1599	15.1143	15.1276	1599	0.945507	3	2	2	15.1204	969.436			37116
1600	15.1276	15.179	1600	0.940211	3	3	4	15.1486	2075.94			100334
1601	15.145	15.1697	1601	0.999691	3	1	2	15.1562	228.136			68746
1603	15.139	15.1849	1603	0.976246	6	1	2	15.1671	276.172			62537
1604	15.1623	15.3735	1604	0.958151	38	3;2	3	15.2689	1831.71			1495280
1606	15.1849	15.3735	1606	0.97661	20	2	3	15.2691	1815.74			1435123
1607	15.1985	15.3093	1607	0.907826	9	2	3	15.2649	1853.69			401697
1608	15.2122	15.2655	1608	0.993642	6	2	3	15.2446	1628.63			307911
1609	15.2212	15.2569	1609	0.943096	3	2	4	15.2416	1846.68			254263
1610	15.1985	15.3271	1610	0.946439	9	2	3	15.2617	1869.66			482030
1612	15.3182	15.4102	1612	0.955223	7	3	4	15.3526	2229.93			368314
1613	15.3361	15.6366	1613	0.955756	71	2;3	4	15.4789	2107.92			668678
1615	15.3271	15.6454	1615	0.99869	60	1	2	15.4932	282.167			189966
1616	15.3361	15.3557	1616	0.975198	3	2	3	15.345	1943.81			160944
1617	15.3557	15.927	1617	0.99804	104	1	2	15.6474	234.161			461797
1618	15.3361	15.3898	1618	0.994484	10	3;2	3	15.3584	1959.77			155344
1619	15.3735	15.927	1619	0.999467	82	1	2	15.6586	227.224			182184
1620	15.3735	15.4601	1620	0.967302	13	3	4	15.4127	2236.96			154233
1621	15.3824	15.6291	1621	0.999825	38	1	2	15.5008	238.141			531587
1622	15.3989	15.6454	1622	0.991356	32	1	2	15.5011	390.276			153042
1623	15.3898	15.4294	1623	0.931925	4	3	3	15.4035	2145.87			87408
1624	15.4048	15.6454	1624	0.99831	31	1	2	15.5048	326			431591
1625	15.3898	15.6081	1625	0.999158	23	1	2	15.511	298.118			259789
1626	15.4048	15.489	1626	0.91233	11	3	4	15.4338	2004.91			141912
1627	15.4162	15.6454	1627	0.998027	32	1	2	15.5141	327.997			456899
1628	15.4216	15.5171	1628	0.996307	12	1	2	15.4741	329.994			143313
1629	15.4353	15.5753	1629	0.999872	10	1	2	15.4925	228.136			79777
1630	15.4162	15.6291	1630	0.999589	15	1	2	15.5237	276.918			69542
1631	15.4294	15.6291	1631	0.99975	19	1	2	15.5136	216.952			72061
1632	15.4353	15.4784	1632	0.999996	4	1	2	15.4545	216.1			41437
1633	15.4413	15.4675	1633	0.999472	4	1	2	15.4555	218.166			103512
1634	15.4542	15.4837	1634	0.999748	5	1	2	15.469	220.146			67249
1636	15.4784	15.4837	1636	0.999917	3	1	2	15.4799	283.199			38329
1637	15.489	15.5171	1637	0.971325	5	2	3	15.5018	1093.46			84968
1638	15.4943	15.5859	1638	0.936602	11	3	4	15.5444	2145.87			70627
1639	15.5055	15.5301	1639	1	3	1	2	15.5192	235.931			93050
1640	15.4996	15.5646	1640	0.993767	8	1	2	15.5359	218.167			117837
1641	15.5055	15.5354	1641	0.902778	4	1	2	15.5189	740.185			56269
1642	15.5646	15.6081	1642	0.996503	4	1	2	15.5858	329.994			119177
1645	15.6202	15.7645	1645	0.972326	25	3;2;4	4	15.6775	1902.75			328360
1646	15.6291	15.6824	1646	0.994237	5	2	3	15.6662	1886.78			122864
1647	15.6291	15.6677	1647	0.96559	5	3;2	3	15.6521	1699.67			96849
1648	15.6366	15.6677	1648	0.952575	3	2	3	15.647	1458.64			123475
1649	15.6081	15.7245	1649	0.999105	7	1	2	15.6787	218.166			135286
1650	15.6454	15.704	1650	0.95451	6	3;4	4	15.6746	2737.14			204422
1651	15.6878	15.9378	1651	0.998123	65	1	2	15.8175	282.167			175777
1652	15.7099	15.9134	1652	0.999783	32	1	2	15.8178	238.141			403301
1653	15.7171	15.9134	1653	0.997476	32	1	2	15.8232	390.276			160730
1654	15.7171	15.7823	1654	0.928072	9	3	4	15.7452	2004.91			119308
1655	15.7171	15.9134	1655	0.999156	36	1	2	15.8129	326			455277
1656	15.7245	15.9134	1656	0.998231	34	1	2	15.8187	327.997			406409
1657	15.7319	15.9075	1657	0.999216	27	1	2	15.8173	298.118			268046
1658	15.7319	15.9075	1658	0.996427	22	1	2	15.8235	329.994			137996
1659	15.7448	15.8171	1659	0.907765	9	2;3	4	15.771	1850.83			48984
1660	15.7544	15.9	1660	0.998224	17	1	2	15.8154	276.918			56308
1661	15.7645	15.9075	1661	0.999646	16	1	2	15.8426	216.952			75514
1662	15.7645	15.8171	1662	0.999596	5	1	2	15.7848	216.099			42668
1663	15.7319	15.8171	1663	0.999531	7	1	2	15.7785	228.136			68894
1664	15.769	15.8587	1664	0.920797	14	2;3	3	15.8078	1919.84			84147
1665	15.7997	15.823	1665	0.920849	3	3	4	15.8093	2075.94			71220
1666	15.7942	15.8721	1666	0.999604	7	1	2	15.8372	255.256			29803
1667	15.7942	15.9	1667	0.999905	12	1	2	15.852	220.146			66333
1668	15.8285	15.8587	1668	0.99897	4	1	2	15.8489	278.151			102728
1669	15.8498	15.9134	1669	0.999921	6	1	2	15.8805	228.136			54004
1670	15.8587	15.9075	1670	0.904752	6	3	3	15.8833	2075.94			52471
1671	15.8631	15.9134	1671	0.959	9	2	3	15.894	1720.71			97381
1672	15.8542	15.8631	1672	0.999937	3	1	2	15.8586	281.214			25637
1673	15.8171	15.9378	1673	0.970326	7	1	2	15.8816	218.166			128366
1674	15.823	15.878	1674	0.995459	5	1	2	15.8502	326.193			25634
1675	15.8391	15.8631	1675	0.988911	3	1	2	15.8498	740.186			50249
1676	15.8449	15.8886	1676	0.999729	7	1	2	15.8685	216.099			60544
1677	15.8587	15.9134	1677	0.999204	6	1	2	15.885	235.931			101686
1678	15.8721	15.9557	1678	0.978148	11	2	3	15.9303	1164.5			967881
1679	15.8587	15.878	1679	0.995057	3	1	2	15.8666	226.975			22596
1681	15.9134	16.3866	1681	0.950028	105	2;3	3	16.0383	1902.75			7791956
1682	15.927	16.3513	1682	0.985607	49	2;3	3	16.0303	1886.78			11274470
1683	15.9378	15.9998	1683	0.968589	6	3	4	15.978	2300.97			2864605
1684	15.927	15.9647	1684	0.967694	5	2	3	15.9562	1924.73			734964
1685	15.9378	15.9557	1685	0.923258	3	2	3	15.9502	1946.71			299661
1686	15.9468	15.9823	1686	0.933623	3	2	3	15.9762	1908.77			1741377
1687	16.0951	16.2491	1687	0.916262	11	2	3	16.1268	1924.73			770577
1688	16.0951	16.1832	1688	0.915469	5	2	3	16.1203	1940.7			651692
1689	16.1473	16.5158	1689	0.999932	59	1	2	16.3288	234.161			430032
1690	16.1562	16.505	1690	0.999901	46	1	2	16.3385	227.224			182273
1691	16.1473	17.4989	1691	0.999868	261	1	2	16.8923	282.167			183352
1692	16.1473	16.9299	1692	0.925951	141	3;2	3	16.636	1791.75			592012
1693	16.1651	16.3065	1693	0.999565	9	1	2	16.2319	218.167			145811
1694	16.1651	16.4872	1694	0.999653	34	1	2	16.3426	327.997			442242
1695	16.1473	16.1889	1695	0.974836	3	2	3	16.1625	1908.76			98416
1696	16.2057	16.4872	1696	0.999488	26	1	2	16.3514	326			441594
1697	16.2146	16.338	1697	0.950401	21	3;2	4	16.2751	2107.92			266279
1698	16.2221	16.4465	1698	0.999475	18	1	2	16.3388	216.952			79739
1699	16.2057	16.2991	1699	0.999963	6	1	2	16.2591	298.118			288088
1700	16.1997	16.4961	1700	0.999949	23	1	2	16.3639	390.275			161496
1701	16.2659	16.4358	1701	0.991021	25	2;3	5	16.345	2075.94			556162
1702	16.2901	16.3194	1702	0.936813	4	3;2	3	16.3106	2022.87			68989
1703	16.3065	16.3458	1703	0.999653	3	1	2	16.3249	238.141			260226
1704	16.2901	16.3866	1704	0.99999	7	1	2	16.3379	276.172			66835
1705	16.314	16.4872	1705	0.999992	10	1	2	16.4142	228.135			63489
1706	16.338	16.4465	1706	0.999813	7	1	2	16.3905	298.118			258045
1707	16.3513	16.3625	1707	0.997482	3	1	2	16.3572	329.994			145335
1708	16.338	16.3866	1708	0.990968	8	2	3	16.3626	1848.77			84484
1709	16.3458	16.3941	1709	0.9996	3	1	2	16.3684	218.167			119024
1710	16.4358	16.4643	1710	0.996551	3	1	2	16.454	329.994			138457
1711	16.4465	16.4961	1711	0.972288	7	2	3	16.4738	1641.69			89750
1712	16.4358	16.4817	1712	0.987159	5	2	3	16.4579	1829.69			60854
1714	16.4643	16.5158	1714	0.921477	7	3	4	16.4918	2308			158231
1715	16.4757	16.5158	1715	0.999821	3	1	2	16.5002	218.166			123409
1718	16.4872	16.6348	1718	0.999169	18	1	2	16.5579	718.3			1142437
1719	16.4872	16.6454	1719	0.992657	19	2	3	16.5599	959.326			861887
1720	16.5842	17.4721	1720	0.999977	189	1	2	17.0268	234.161			470694
1721	16.6021	16.7363	1721	0.977321	16	3	5	16.6545	2308			223123
1722	16.5842	17.4634	1722	0.999185	136	1	2	17.0302	227.224			163854
1723	16.5842	17.4546	1723	0.999977	89	1	2	17.0047	216.952			82990
1724	16.6185	17.4379	1724	0.998249	127	1	2	17.0366	326			443962
1725	16.6185	17.4486	1725	0.997675	132	1	2	17.0319	327.997			419396
1726	16.6185	16.6695	1726	0.90916	4	2	3	16.6327	1829.7			84761
1727	16.6274	16.8147	1727	0.976098	16	2	3	16.7159	1588.67			62001
1728	16.6185	16.7257	1728	0.976382	9	3	3	16.6701	2073.93			69554
1729	16.5842	17.2301	1729	0.99989	55	1	2	16.9492	228.135			70923
1730	16.6185	16.6769	1730	0.965199	4	2	3	16.6389	1813.73			80655
1731	16.6454	16.731	1731	0.976829	12	2	3	16.6831	1456.63			100590
1732	16.6588	17.4138	1732	0.999624	108	1	2	17.0348	298.118			263210
1733	16.6695	17.4254	1733	0.997099	109	1	2	17.0263	390.276			151334
1734	16.6588	17.4379	1734	0.997486	81	1	2	17.023	329.994			139704
1736	16.6769	17.2463	1736	0.997856	59	1	2	16.946	276.918			56538
1737	16.6769	17.2242	1737	0.999991	50	1	2	16.9345	238.141			275029
1738	16.6769	16.7257	1738	0.99804	4	1	2	16.7017	276.172			61472
1739	16.6906	16.7678	1739	0.998271	13	1	2	16.7317	549.216			157011
1740	16.6769	16.8094	1740	0.999717	9	1	2	16.7277	220.146			57720
1741	16.715	16.7257	1741	0.982711	3	3	5	16.7204	2298.95			45616
1742	16.6961	16.7422	1742	0.999823	3	1	2	16.7194	281.214			34028
1743	16.6906	16.7482	1743	0.9642	4	2	3	16.7223	1641.7			36620
1744	16.7363	16.8549	1744	0.920329	12	2	3	16.8005	1829.69			61739
1745	16.7541	16.8683	1745	0.949551	8	1	2	16.8159	740.186			57354
1746	16.7619	16.8147	1746	0.95792	5	3	3	16.7848	2073.93			49364
1747	16.7619	16.8094	1747	0.999766	6	1	2	16.7868	276.172			56214
1748	16.7738	16.9161	1748	0.999979	16	1	2	16.8603	218.166			114583
1749	16.8041	16.8683	1749	0.947235	7	2	3	16.8345	1813.73			43721
1751	16.8094	17.72	1751	0.990539	218	3;2	3	17.4217	1862.78			3787541
1752	16.8147	16.8919	1752	0.999968	5	1	2	16.852	216.099			62279
1753	16.843	16.8919	1753	0.999113	5	1	2	16.865	235.931			91111
1755	16.8094	16.843	1755	0.953386	3	3	3	16.8256	2586.09			33068
1756	16.8313	16.9354	1756	0.939244	9	3	4	16.8711	2002.89			85829
1757	16.843	16.9414	1757	1	12	1	2	16.8988	220.146			60325
1758	16.8623	16.9354	1758	0.999928	6	1	2	16.9007	255.255			31988
1759	16.8549	16.9028	1759	0.964767	4	2	3	16.8848	1884.77			41583
1760	16.8549	16.8974	1760	0.999342	3	1	2	16.8735	217.976			64404
1761	16.843	16.8738	1761	0.98231	3	3	3	16.8565	2105.9			50091
1762	16.8489	17.0689	1762	0.960455	17	3	3	16.9684	2073.93			46531
1763	16.8683	16.9161	1763	0.993687	4	1	2	16.8954	249.992			31856
1764	16.9072	16.9473	1764	0.979174	5	1	2	16.9232	740.185			53169
1765	16.922	16.9582	1765	0.993336	5	1	2	16.9416	216.1			37644
1766	16.922	16.983	1766	0.924917	7	3	3	16.9549	2774.22			57027
1767	16.9299	16.9715	1767	0.948733	6	2	3	16.9471	1884.77			46608
1768	16.9072	16.983	1768	0.987646	8	2;3	3	16.9419	1900.73			56298
1769	16.9028	16.999	1769	0.99116	6	1	2	16.9546	281.213			25643
1770	16.9414	16.9775	1770	0.996976	4	1	2	16.9628	326.193			27276
1771	16.9473	17.0742	1771	0.965256	21	2	3	17.0108	1164.5			177669
1772	16.9528	17.4486	1772	0.960334	60	2	4	17.1993	1789.73			95094
1773	16.9299	16.9775	1773	0.997464	4	1	2	16.9594	276.172			54608
1774	16.9354	17.041	1774	0.983793	7	2	3	16.9919	1641.7			42116
1775	16.9775	17.0121	1775	0.997222	4	1	2	16.9971	218.166			101592
1776	16.9937	17.144	1776	0.999965	10	1	2	17.0587	216.099			39136
1777	17.0043	17.6508	1777	0.923902	61	2	3	17.4764	1884.77			553663
1778	16.983	17.0521	1778	0.963158	6	1	2	17.012	740.187			48314
1779	16.983	17.3459	1779	0.999902	30	1	2	17.1456	220.146			62821
1780	17.0121	17.0689	1780	0.999132	5	1	2	17.0387	276.172			55301
1781	17.018	17.669	1781	0.962049	100	2;3	4	17.4767	1900.73			553778
1782	17.018	17.0965	1782	0.995142	6	1	2	17.0583	255.255			29060
1783	17.0355	17.0689	1783	0.908199	6	2	3	17.0561	1878.81			45100
1784	17.041	17.0689	1784	0.995612	4	1	2	17.052	219.174			22417
1785	17.058	17.0908	1785	0.999393	3	1	2	17.0762	218.166			109328
1787	17.0802	17.1039	1787	0.99768	3	1	2	17.0923	326.193			34247
1788	17.1154	17.5362	1788	0.966582	35	3	3	17.4148	2073.93			359614
1789	17.1095	17.692	1789	0.979182	55	2	3	17.5045	1659.71			535390
1790	17.1269	17.4634	1790	0.999205	28	1	2	17.288	218.166			146835
1791	17.1496	17.3459	1791	0.99329	16	1	2	17.2336	740.185			50736
1793	17.1683	17.2074	1793	0.94896	3	3	3	17.185	2716.17			42121
1794	17.1638	17.2301	1794	0.9999	4	1	2	17.1941	298.25			36973
1795	17.1956	17.2129	1795	0.923645	3	2	3	17.2024	1641.7			63390
1796	17.1896	17.2677	1796	0.999142	5	1	2	17.2281	281.214			30782
1797	17.1759	17.3015	1797	0.997555	7	1	2	17.241	216.099			38639
1798	17.2516	17.3068	1798	0.977909	11	2;3	4	17.2765	1917.83			58426
1799	17.2516	17.2826	1799	0.94036	3	2	3	17.2626	1641.69			41813
1800	17.2628	17.3459	1800	0.999997	6	1	2	17.2955	238.141			228498
1801	17.2677	17.4634	1801	0.999686	19	1	2	17.3573	228.135			64207
1802	17.2826	17.3927	1802	0.99969	12	1	2	17.3385	276.918			50447
1804	17.3015	17.3348	1804	0.998468	3	1	2	17.3185	276.171			45059
1805	17.3348	17.3821	1805	0.948753	7	3	5	17.3595	2298.95			68815
1806	17.3702	17.481	1806	0.935519	15	3;4	5	17.4278	2845.25			333994
1808	17.4049	17.571	1808	0.967811	9	2	3	17.5217	1641.7			215605
1812	17.481	17.5362	1812	0.91749	3	2	4	17.5114	1938.68			149708
1813	17.5184	17.5536	1813	0.986469	5	2	3	17.5363	1364.58			172057
1814	17.6068	18.8349	1814	0.999785	293	1	2	18.362	282.167			533736
1815	17.6246	18.8081	1815	0.999298	174	1	2	18.2001	227.224			181543
1816	17.6157	18.826	1816	0.99902	247	1	2	18.2029	234.161			473096
1817	17.6157	17.7497	1817	0.99975	15	1	2	17.6736	218.166			135182
1818	17.6396	17.9243	1818	0.999887	37	1	2	17.7847	298.118			249475
1819	17.6396	18.3847	1819	0.993588	97	1	2	18.0078	390.276			154502
1820	17.6582	18.6569	1820	0.999656	135	1	2	18.1218	326			467922
1821	17.6582	18.817	1821	0.999117	153	1	2	18.1851	327.997			472032
1822	17.6637	17.8064	1822	0.996412	16	1	2	17.7418	329.994			134117
1823	17.6747	17.72	1823	0.996718	4	1	2	17.6944	295.136			93503
1824	17.669	18.2919	1824	0.939091	98	2;3	3	18.024	1789.73			241038
1825	17.6637	17.7147	1825	0.994814	4	1	2	17.6861	281.213			28815
1826	17.6747	17.8966	1826	0.999986	25	1	2	17.7777	238.141			263255
1827	17.6806	17.9429	1827	0.999983	34	1	2	17.8083	216.952			80342
1828	17.6747	18.0228	1828	0.999976	30	1	2	17.8236	220.146			64952
1829	17.6637	17.7253	1829	0.982543	6	1	2	17.691	740.187			47154
1830	17.6747	17.692	1830	0.999348	3	1	2	17.6831	228.136			50833
1832	17.6806	17.7368	1832	0.92826	7	2	3	17.7029	1364.58			66526
1833	17.669	17.7093	1833	0.999565	3	1	2	17.682	276.172			46477
1834	17.669	17.8966	1834	0.9987	25	1	2	17.7841	276.918			52661
1835	17.6979	17.7835	1835	0.999257	9	1	2	17.7463	255.256			29515
1836	17.7093	17.8507	1836	0.999754	13	1	2	17.7835	216.1			45941
1837	17.7313	17.9299	1837	0.999996	19	1	2	17.8125	228.135			56962
1838	17.72	17.7835	1838	0.996888	4	1	2	17.7521	219.174			25069
1839	17.6979	17.7608	1839	0.993441	4	1	2	17.7245	326.193			23905
1841	17.7551	17.7835	1841	0.999561	4	1	2	17.7674	281.214			34723
1842	17.7368	17.7667	1842	0.997761	4	1	2	17.7519	278.151			95956
1843	17.7608	17.8616	1843	0.989214	6	1	2	17.813	260.123			58800
1844	17.8011	17.8391	1844	0.904785	6	3;2	3	17.8206	2139.9			63625
1845	17.7667	17.8282	1845	0.990149	6	1	2	17.8059	740.186			41119
1846	17.817	17.8282	1846	0.913309	3	2	3	17.8225	1860.77			148465
1847	17.8282	17.9243	1847	0.973618	24	3;2	3	17.8723	1830.8			121066
1848	17.8338	17.873	1848	0.99982	5	1	2	17.8514	326.193			28623
1849	17.8391	17.9019	1849	0.997556	6	1	2	17.8705	329.994			116148
1850	17.8338	17.879	1850	0.999997	5	1	2	17.8589	255.255			30647
1851	17.8507	17.8911	1851	0.999939	4	1	2	17.8721	276.172			61004
1852	17.8616	17.9079	1852	0.958557	6	1	2	17.8835	740.186			57304
1853	17.8616	19.0261	1853	0.955026	258	2;3	3	18.4643	1860.77			1147575
1854	17.8616	17.8966	1854	0.980691	5	2	3	17.8795	1627.71			50772
1855	17.8911	17.9664	1855	0.982847	7	3	3	17.9344	1842.76			59419
1856	17.8966	18.0228	1856	0.946866	11	2	3	17.9568	1882.76			58848
1858	17.9243	18.0169	1858	0.999186	9	1	2	17.9662	218.166			121298
1859	17.9374	18.0283	1859	0.936528	9	3	5	17.9741	2755.11			158011
1860	17.9243	17.9664	1860	0.989774	6	2	4	17.9481	1898.72			74362
1861	17.9299	17.9957	1861	0.93716	4	3	5	17.9589	2739.14			98984
1862	17.9429	18.0169	1862	0.999471	6	1	2	17.9743	276.918			53872
1863	17.9611	18.6569	1863	0.999463	60	1	2	18.2594	298.118			274124
1864	17.9374	17.9897	1864	0.901036	4	3	3	17.9636	1824.75			61503
1865	17.9664	18.0091	1865	0.999974	4	1	2	17.9893	228.135			71007
1866	17.9791	18.3195	1866	0.996315	31	1	2	18.1319	329.994			145640
1867	17.9791	18.648	1867	0.999769	51	1	2	18.2921	216.951			89223
1869	18.0091	18.0517	1869	0.937214	3	2	4	18.029	1898.71			41530
1870	17.9897	18.2172	1870	0.99944	13	1	2	18.119	216.1			60068
1871	18.0283	18.4014	1871	0.999627	25	1	2	18.2275	238.141			236763
1872	18.0772	18.3033	1872	0.999998	21	1	2	18.1989	228.136			62547
1873	18.089	18.1761	1873	0.961871	19	3;2	4	18.1267	1830.8			86566
1874	18.1146	18.339	1874	0.998497	19	1	2	18.2197	276.918			51804
1875	18.1087	18.2281	1875	0.999155	10	1	2	18.1751	218.167			119511
1876	18.1201	18.2555	1876	0.924239	10	1	2	18.1848	740.186			59082
1877	18.1434	18.2006	1877	0.999465	5	1	2	18.1682	326.193			35453
1878	18.1549	18.2633	1878	0.923788	11	3;4	4	18.198	3031.32			110572
1879	18.1839	18.2113	1879	0.999685	3	1	2	18.1954	220.146			52839
1881	18.2555	18.817	1881	0.999958	58	1	2	18.6025	299.194			494583
1882	18.2633	18.3483	1882	0.99986	8	1	2	18.3016	216.099			44798
1883	18.25	18.2974	1883	0.968028	3	3	3	18.2746	1842.76			39201
1884	18.2859	18.5383	1884	0.996374	16	1	2	18.4011	218.167			123635
1886	18.3142	18.3681	1886	0.98871	3	1	2	18.3382	326.193			26341
1887	18.3142	18.3483	1887	0.90217	3	2	3	18.3356	1898.72			44814
1888	18.3269	18.4217	1888	0.920778	6	3	6	18.3908	2755.1			112032
1889	18.3681	18.4217	1889	0.99998	6	1	2	18.3956	228.136			59863
1890	18.3847	18.5308	1890	0.997361	10	1	2	18.459	329.994			144936
1891	18.3906	18.4162	1891	0.972011	3	2	3	18.4035	1898.72			47294
1892	18.3961	18.4088	1892	0.995817	3	3	4	18.402	2739.14			98075
1893	18.4217	18.6177	1893	0.999346	19	1	2	18.5044	390.276			149657
1895	18.4429	18.4832	1895	0.919937	4	3;4	4	18.4736	2999.34			63334
1896	18.4355	18.4946	1896	0.997629	3	1	2	18.4676	220.146			66259
1897	18.4217	18.4887	1897	0.999698	3	1	2	18.4564	276.172			54362
1898	18.4088	18.5121	1898	0.989531	5	1	2	18.4595	216.099			49801
1899	18.4698	18.5308	1899	1	5	1	2	18.4952	228.136			60742
1900	18.5005	18.826	1900	0.988702	73	3;2	4	18.6672	1901.83			574312
1901	18.5065	18.5813	1901	0.953133	11	2	3	18.5512	1698.75			151036
1902	18.5383	18.5565	1902	0.945389	3	3	3	18.5471	1939.78			55016
1903	18.564	18.648	1903	0.942978	11	4;3	4	18.6105	3224.37			199684
1904	18.5813	18.6088	1904	0.999975	3	1	2	18.5963	228.136			70807
1906	18.5902	18.6177	1906	0.998239	3	1	2	18.6032	329.994			129424
1908	18.6373	18.678	1908	0.982128	3	3	4	18.6634	2095.88			88172
1909	18.678	18.826	1909	0.981366	10	1	2	18.7517	218.166			129743
1911	18.6947	18.817	1911	0.998776	10	1	2	18.7547	216.952			72285
1912	18.6894	18.7917	1912	0.971939	16	2	4	18.747	1698.76			121947
1914	18.7359	18.817	1914	0.999944	9	1	2	18.7828	326			434420
1915	18.7359	18.8081	1915	0.998389	4	1	2	18.7752	298.118			251958
1916	18.7757	18.8081	1916	0.981412	4	1	2	18.7898	390.275			148865
1917	18.7566	18.7917	1917	0.999651	3	1	2	18.7763	329.994			119968
1919	18.7917	18.9429	1919	0.923521	19	3;4	5	18.8694	2826.13			1287571
1920	18.8081	18.9518	1920	0.9547	9	3	5	18.8589	2810.17			674781
1921	18.8081	18.8726	1921	0.919556	4	3	4	18.8472	2864.09			360836
1922	18.7917	18.9165	1922	0.939922	5	2	3	18.8762	1861.77			988383
1923	18.8349	18.8636	1923	0.999094	3	1	2	18.8519	930.884			396749
1924	18.8349	18.8815	1924	0.903461	4	3	5	18.8607	2832.17			267749
1925	18.9078	32.0291	1925	0.999999	4925	1	2	25.5073	282.167			603557
1926	18.9254	20.5486	1926	0.999265	377	1	2	19.7502	234.161			454076
1928	18.9339	18.9755	1928	0.96279	4	2;3	3	18.9544	1898.72			170867
1929	18.9815	19.0389	1929	0.999746	4	1	2	19.0127	218.167			128021
1930	18.9996	19.0315	1930	0.98233	3	2	3	19.016	1854.85			73280
1931	18.9996	20.4721	1931	0.999328	249	1	2	19.7443	227.224			186536
1932	18.989	19.4789	1932	0.999764	67	1	2	19.2339	326			443698
1933	18.9755	19.4789	1933	0.999606	73	1	2	19.2375	327.997			454115
1935	19.0315	19.0864	1935	0.998125	4	1	2	19.0554	329.994			114076
1936	19.0389	19.4423	1936	0.999833	54	1	2	19.2513	216.952			81277
1937	19.0535	19.4714	1937	0.999545	61	1	2	19.2472	390.276			149172
1938	19.0535	19.4536	1938	0.998946	56	1	2	19.2567	298.118			233797
1939	19.0535	19.4643	1939	0.999863	53	1	2	19.2319	299.194			245752
1940	19.0643	19.1152	1940	0.999899	4	1	2	19.0932	216.1			49747
1941	19.0643	19.1281	1941	0.967386	4	3	4	19.0883	2715.14			50433
1942	19.0864	19.3731	1942	0.999996	26	1	2	19.2404	238.141			261517
1943	19.1038	19.1952	1943	0.998673	8	1	2	19.1433	276.172			56332
1944	19.1335	19.1601	1944	0.950729	4	1	2	19.1501	740.187			56238
1945	19.1152	19.1707	1945	0.999339	5	1	2	19.1401	276.919			49256
1946	19.1152	19.3676	1946	0.999761	23	1	2	19.2526	228.136			55423
1947	19.1442	19.1897	1947	0.999655	5	1	2	19.1686	218.167			121183
1948	19.1601	19.2553	1948	0.977484	10	3	4	19.2077	2715.14			70128
1949	19.1654	19.2903	1949	0.9985	13	1	2	19.2156	329.994			134164
1950	19.1764	19.2789	1950	0.999972	7	1	2	19.2183	216.1			53109
1951	19.1764	19.2126	1951	0.99902	4	1	2	19.1934	255.256			34501
1953	19.234	19.3286	1953	0.986478	10	1	2	19.2793	740.187			53812
1954	19.2394	19.2671	1954	0.998335	4	1	2	19.254	295.137			112593
1955	19.234	19.3731	1955	0.999871	13	1	2	19.3088	276.918			55019
1956	19.234	19.2553	1956	0.999446	4	1	2	19.2425	276.172			40512
1957	19.234	19.2789	1957	0.999998	4	1	2	19.2567	220.146			51789
1958	19.2447	19.3805	1958	0.999969	9	1	2	19.3119	326.193			35135
1959	19.2789	19.3676	1959	1	7	1	2	19.3254	218.167			107991
1960	19.273	19.3392	1960	0.932782	5	3	5	19.3115	2786.18			76531
1961	19.3177	19.3676	1961	0.999965	7	1	2	19.341	220.146			51556
1962	19.3232	19.3731	1962	0.981609	4	1	2	19.3457	281.213			23620
1963	19.3286	19.3927	1963	0.998922	8	1	2	19.3566	329.994			125777
1964	19.3338	19.3676	1964	0.999481	4	1	2	19.3505	278.151			106557
1965	19.3286	19.3449	1965	0.999936	3	1	2	19.3368	216.1			43825
1966	19.3338	19.3617	1966	0.900769	7	3;2	4	19.3481	2087.9			42923
1967	19.2903	19.4216	1967	0.99997	7	1	2	19.3626	298.25			37642
1968	19.3392	19.3676	1968	0.999999	3	1	2	19.3528	255.255			28977
1970	19.4002	19.5959	1970	0.991901	44	2;3	3	19.4942	1811.68			256857
1971	19.4056	19.6008	1971	0.944672	25	2	3	19.5029	1795.72			228414
1972	19.4056	19.5848	1972	0.980971	26	2	3	19.5017	1570.66			253096
1973	19.4348	19.5168	1973	0.998925	5	1	2	19.473	228.135			66167
1974	19.4348	19.4789	1974	0.996568	3	1	2	19.4631	329.994			123170
1975	19.4294	19.4643	1975	0.923135	3	3	5	19.4449	2786.19			78186
1976	19.4216	19.5371	1976	0.966205	8	2	3	19.4978	1833.66			80540
1977	19.4714	19.5959	1977	0.981166	21	3;2	4	19.538	2087.9			224144
1978	19.543	20.4646	1978	0.997609	158	1	2	20.0253	327.997			412418
1979	19.566	19.6971	1979	0.99921	16	1	2	19.6313	238.141			223844
1980	19.5601	20.4469	1980	0.99966	145	1	2	20.0382	390.276			158715
1981	19.5541	19.7212	1981	0.995181	13	1	2	19.6326	218.166			136413
1982	19.5484	19.7647	1982	0.999979	26	1	2	19.6396	216.952			69540
1983	19.5484	20.1132	1983	0.969421	71	3;2	5	19.9293	2786.18			633785
1984	19.543	20.4469	1984	0.998234	152	1	2	20.0288	326			450508
1985	19.5719	20.4646	1985	0.99963	145	1	2	20.037	298.118			251619
1986	19.5719	19.8521	1986	0.998245	36	1	2	19.7056	299.194			89567
1987	19.5719	19.685	1987	0.999826	15	1	2	19.6299	276.918			52998
1988	19.5848	20.4271	1988	0.997894	94	1	2	20.047	329.994			143957
1989	19.5959	19.8794	1989	0.999222	28	1	2	19.7267	228.136			62595
1990	19.5959	19.6895	1990	0.99941	7	1	2	19.6426	255.256			33075
1991	19.6008	19.9829	1991	0.999915	30	1	2	19.766	216.1			49982
1992	19.5848	19.6971	1992	0.997408	12	1	2	19.6506	326.193			30942
1993	19.5959	19.7515	1993	0.999959	15	1	2	19.6602	220.146			55088
1994	19.6008	19.6971	1994	0.998941	8	1	2	19.6454	276.172			57251
1995	19.6008	19.7212	1995	0.998617	11	1	2	19.656	295.136			101998
1996	19.6142	19.6757	1996	0.914897	8	1	2	19.6469	740.187			52523
1997	19.6256	19.6971	1997	0.954518	5	3	4	19.6577	2087.9			46082
1998	19.6142	19.6539	1998	0.999976	3	1	2	19.634	222.005			49085
1999	19.6097	19.685	1999	0.99988	8	1	2	19.6501	281.213			29443
2000	19.6484	19.6757	2000	0.999931	3	1	2	19.6623	278.151			103788
2002	19.6539	19.6757	2002	0.999991	3	1	2	19.6673	235.931			70060
2003	19.6425	19.7078	2003	1	4	1	2	19.6754	298.25			28342
2004	19.6484	19.6895	2004	0.998724	3	1	2	19.6659	249.992			32637
2005	19.6971	19.8047	2005	0.985964	16	2	3	19.752	1570.66			187706
2006	19.7078	19.9621	2006	0.924061	36	2;3	4	19.8448	1811.69			121256
2007	19.6971	19.7933	2007	0.976145	12	2	3	19.7497	1795.72			105700
[truncated: 1,309 more rows]

## Sheet: WT3
RAW OUTPUT (WT3 SAMPLE)														CONSOLIDATED DATA
ID	xicStart	xicEnd	feature	corrMax	ionCount	chargeOrder	maxIsotopeCount	rt	mwMonoisotopic	theo_mwMonoisotopic	inferredStructure	maxIntensity		Structure	Intensity	RT	Abundance	Obs	Theo	Dppm	Oligomerisation state
284	3.84389	4.02021	284	0.999987	29	1	2	3.92183	478.178	478.1799	GM (Anhydro) |0	243487		GM|0	20022557	3.61888	0.0380667	498.205	498.206	2.62907	0
856	9.52641	9.57805	856	0.997757	3	1	2	9.56576	478.178	478.1799	GM (Anhydro) |0	659420		GM (x2)|0,GM-GM|0	1723056	10.141	0.00327586	976.384	976.386	1.97906	0
436	5.38524	5.58115	436	0.998682	30	1	2	5.48529	478.179	478.1799	GM (Anhydro) |0	417967		GM (Anhydro) |0	1320874	9.56576	0.00251123	478.178	478.18	4.36521	0
81	2.2205	2.3213	81	0.999782	11	1	2	2.26251	456.194	456.1956	GM (Deacetyl) |0	296027		GM (Deacetyl) |0	902269	2.57548	0.00171539	456.194	456.196	3.40206	0
118	2.48866	2.66593	118	0.996536	31	1	2	2.57548	456.194	456.1956	GM (Deacetyl) |0	606242		GM (x2) (Deacetyl) |0	498589	6.87939	0.000947913	934.372	934.375	3.56836	0
539	6.76519	7.04578	539	0.998779	45	2	3	6.87939	934.372	934.3755000000001	GM (x2) (Deacetyl) |0	498589		GM-AEJA|1	202171568	10.0779	0.384367	941.405	941.408	2.41131	1
919	10.118	10.2185	919	0.992448	10	2	2	10.141	976.384	976.3860000000001,976.386	GM (x2)|0,GM-GM|0	1723056		GM-AEJ|1	72265128	6.57924	0.13739	870.368	870.371	3.53051	1
1810	17.3869	17.4956	1810	0.999975	19	1	2	17.4406	678.258	678.2596	GM-AE (Anhydro) |1	261507		GM-AEJKR|1	37249290	9.6017	0.070818	1154.56	1154.57	4.38636	1
1446	13.9111	14.1189	1446	0.999998	58	2;1	2	14.0033	850.342	850.3444	GM-AEJ (Anhydro) |1	3039575		GM-AE|1	7737109	9.61474	0.0147097	698.284	698.286	2.95129	1
366	4.69098	4.93947	366	0.989126	31	2	3	4.78346	828.357	828.3601	GM-AEJ (Deacetyl) |1	243795		GM-AEJG|1	3262703	7.90534	0.00620302	927.39	927.392	2.30106	1
1928	18.5855	18.9343	1928	0.991164	40	2	3	18.7641	1702.7	1702.7042	GM-AEJ-GM-AEJ (Anhydro) |2	633540		GM-AEJ (Anhydro) |1	3039575	14.0033	0.00577882	850.342	850.344	2.35911	1
1985	19.3378	20.1001	1985	0.974422	176	2;3	3	19.6414	1773.74	1773.7413,1773.7413	GM-AEJ-GM-AEJA (Anhydro) |2,GM-AEJA-GM-AEJ (Anhydro) |2	2140978		GM-AEJA (Anhydro) |1	2466850	16.5371	0.00468996	921.38	921.381	1.57086	1
1524	14.5089	14.5788	1524	0.962096	20	2;3	4	14.545	1793.76	1793.7675,1793.7675	GM-AEJ-GM-AEJA|2,GM-AEJA-GM-AEJ|2	2729818		GM-AEJGA|1	1097573	9.49785	0.0020867	998.426	998.429	3.20621	1
1557	14.7155	14.7551	1557	0.969728	7	3;2	3	14.7413	1793.76	1793.7675,1793.7675	GM-AEJ-GM-AEJA|2,GM-AEJA-GM-AEJ|2	2029627		GM-AEJA (Deacetyl) |1	881193	8.62847	0.00167532	899.395	899.397	2.72535	1
1563	14.8362	15.5976	1563	0.999922	168	2;3	3	15.0648	1793.76	1793.7675,1793.7675	GM-AEJ-GM-AEJA|2,GM-AEJA-GM-AEJ|2	11321038		M-AEJ|1	848828	4.56487	0.00161378	667.288	667.291	4.58199	1
1645	15.7133	15.8648	1645	0.928903	21	2;3	3	15.7928	1793.76	1793.7675,1793.7675	GM-AEJ-GM-AEJA|2,GM-AEJA-GM-AEJ|2	67188		GM-AEJKR (Anhydro) |1	537997	14.8347	0.00102284	1134.54	1134.54	2.33995	1
1467	14.0787	14.3941	1467	0.991295	66	3;2	3	14.2335	1722.72	1722.7304	GM-AEJ-GM-AEJ|2	2563377		GM-AEJAA|1	300267	11.4005	0.000570865	1012.44	1012.44	2.41372	1
1709	16.4423	16.6458	1709	0.998285	52	1;2	2	16.5371	921.38	921.3815	GM-AEJA (Anhydro) |1	2466850		GM-AE (Anhydro) |1	261507	17.4406	0.000497175	678.258	678.26	2.65501	1
739	8.52619	8.73158	739	0.998814	36	2	3	8.62847	899.395	899.3972	GM-AEJA (Deacetyl) |1	881193		M-AEJA|1	251685	8.56862	0.000478501	738.326	738.328	3.71511	1
2214	21.6271	21.6489	2214	0.904617	4	3	4	21.6367	2626.09	2626.1011,2626.1011	GM-AEJA-GM-AEJ-GM-AEJ (Anhydro) |3,GM-AEJ-GM-AEJ-GM-AEJA (Anhydro) |3	31339		GM-AEJ (Deacetyl) |1	243795	4.78346	0.000463501	828.357	828.36	3.26512	1
2172	21.134	21.2093	2172	0.905953	7	3	4	21.1608	2626.1	2626.1011,2626.1011	GM-AEJA-GM-AEJ-GM-AEJ (Anhydro) |3,GM-AEJ-GM-AEJ-GM-AEJA (Anhydro) |3	54054		GM-GM-AEJA|1	200949	13.1185	0.000382043	1419.58	1419.59	3.08161	1
2161	21.0608	21.0807	2161	0.953877	4	3	3	21.0702	2626.1	2626.1011,2626.1011	GM-AEJA-GM-AEJ-GM-AEJ (Anhydro) |3,GM-AEJ-GM-AEJ-GM-AEJA (Anhydro) |3	43470		GM-GM-AEJ|1	120683	11.3314	0.000229442	1348.55	1348.55	2.25517	1
1811	17.4017	17.4956	1811	0.944807	12	3	4	17.4363	2646.12	2646.1273,2646.1273	GM-AEJA-GM-AEJ-GM-AEJ|3,GM-AEJ-GM-AEJ-GM-AEJA|3	127311		GM-AEJA-GM-AEJA|2,GM-AEJAA-GM-AEJ|2	96925703	15.9914	0.184274	1864.8	1864.8	2.58573	2
2063	20.0718	20.2115	2063	0.981371	35	2;3	3	20.1388	1844.77	1844.7784,1844.7784	GM-AEJA-GM-AEJA (Anhydro) |2,GM-AEJAA-GM-AEJ (Anhydro) |2	138064		GM-AEJKR-GM-AEJA|2	19968356	14.8123	0.0379637	2077.96	2077.96	2.74038	2
2091	20.3924	21.0493	2091	0.992443	144	2;3	3	20.5479	1844.77	1844.7784,1844.7784	GM-AEJA-GM-AEJA (Anhydro) |2,GM-AEJAA-GM-AEJ (Anhydro) |2	4125624		GM-AEJ-GM-AEJA|2,GM-AEJA-GM-AEJ|2	16147671	15.0648	0.0306998	1793.76	1793.77	2.96557	2
2168	21.1029	21.1296	2168	0.918677	3	2	3	21.1133	1844.77	1844.7784,1844.7784	GM-AEJA-GM-AEJA (Anhydro) |2,GM-AEJAA-GM-AEJ (Anhydro) |2	29218		GM-AEJA-GM-AEJA (Anhydro) |2,GM-AEJAA-GM-AEJ (Anhydro) |2	4292906	20.5479	0.00816164	1844.77	1844.78	2.37357	2
1585	15.0982	15.2553	1585	0.95914	29	2;3	4	15.1816	1822.79	1822.7941,1822.7941	GM-AEJA-GM-AEJA (Deacetyl) |2,GM-AEJAA-GM-AEJ (Deacetyl) |2	327129		GM-AEJKR-GM-AEJ|2	3865707	14.223	0.00734945	2006.92	2006.93	3.25221	2
1872	17.9719	18.0015	1872	0.913808	4	2;3	3	17.9878	1864.81	1864.8046,1864.8046	GM-AEJA-GM-AEJA|2,GM-AEJAA-GM-AEJ|2	31628		GM-AEJKR-GM-AEJA (Anhydro) |2	2943445	19.0014	0.00559605	2057.93	2057.94	1.61706	2
1837	17.629	17.6737	1837	0.952997	3	2	3	17.6508	1864.8	1864.8046,1864.8046	GM-AEJA-GM-AEJA|2,GM-AEJAA-GM-AEJ|2	36514		GM-AEJ-GM-AEJ|2	2563377	14.2335	0.00487347	1722.72	1722.73	3.23501	2
1635	15.541	17.4233	1635	0.972178	485	2;3	3	15.9914	1864.8	1864.8046,1864.8046	GM-AEJA-GM-AEJA|2,GM-AEJAA-GM-AEJ|2	96752824		GM-AEJ-GM-AEJA (Anhydro) |2,GM-AEJA-GM-AEJ (Anhydro) |2	2140978	19.6414	0.00407041	1773.74	1773.74	2.12981	2
1580	15.0513	15.0982	1580	0.949169	3	3	3	15.0706	1864.8	1864.8046,1864.8046	GM-AEJA-GM-AEJA|2,GM-AEJAA-GM-AEJ|2	58024		GM-AEJG-GM-AEJA|2,GM-AEJGA-GM-AEJ|2	2116009	14.6632	0.00402294	1850.78	1850.79	2.56479	2
1846	17.7337	17.9365	1846	0.941337	24	2;3	3	17.8406	1864.8	1864.8046,1864.8046	GM-AEJA-GM-AEJA|2,GM-AEJAA-GM-AEJ|2	46713		GM-AEJGA-GM-AEJA|2	906636	15.3084	0.00172369	1921.82	1921.83	1.75492	2
2189	21.3098	21.3948	2189	0.974005	12	3	5	21.3621	2697.13	2697.1382,2697.1382,2697.1382	GM-AEJAA-GM-AEJ-GM-AEJ (Anhydro) |3,GM-AEJA-GM-AEJ-GM-AEJA (Anhydro) |3,GM-AEJ-GM-AEJA-GM-AEJA (Anhydro) |3	124901		GM-AEJKR-GM-AEJ (Anhydro) |2	699477	18.0656	0.00132984	1986.9	1986.9	2.0175	2
2199	21.4284	21.8646	2199	0.964766	59	3;2	5	21.6275	2697.13	2697.1382,2697.1382,2697.1382	GM-AEJAA-GM-AEJ-GM-AEJ (Anhydro) |3,GM-AEJA-GM-AEJ-GM-AEJA (Anhydro) |3,GM-AEJ-GM-AEJA-GM-AEJA (Anhydro) |3	279020		GM-AEJ-GM-AEJ (Anhydro) |2	633540	18.7641	0.00120448	1702.7	1702.7	4.08817	2
2239	21.9359	22.1153	2239	0.9785	28	3;2	5	22.0281	2697.13	2697.1382,2697.1382,2697.1382	GM-AEJAA-GM-AEJ-GM-AEJ (Anhydro) |3,GM-AEJA-GM-AEJ-GM-AEJA (Anhydro) |3,GM-AEJ-GM-AEJA-GM-AEJA (Anhydro) |3	200597		GM-AEJAA-GM-AEJA|2	392650	16.5172	0.000746503	1935.84	1935.84	1.79236	2
2251	22.0151	22.0435	2251	0.977718	3	3	5	22.0268	2768.17	2768.1753,2768.1753	GM-AEJAA-GM-AEJ-GM-AEJA (Anhydro) |3,GM-AEJA-GM-AEJA-GM-AEJA (Anhydro) |3	46528		GM-AEJA-GM-AEJA (Deacetyl) |2,GM-AEJAA-GM-AEJ (Deacetyl) |2	327129	15.1816	0.000621935	1822.79	1822.79	3.25426	2
2260	22.0968	22.1212	2260	0.95414	5	3	4	22.1077	2768.17	2768.1753,2768.1753	GM-AEJAA-GM-AEJ-GM-AEJA (Anhydro) |3,GM-AEJA-GM-AEJA-GM-AEJA (Anhydro) |3	65421		GM-AEJG-GM-AEJ|2	269461	13.9236	0.000512297	1779.75	1779.75	2.74101	2
2268	22.1775	22.6479	2268	0.958345	87	3;2	5	22.4062	2768.17	2768.1753,2768.1753	GM-AEJAA-GM-AEJ-GM-AEJA (Anhydro) |3,GM-AEJA-GM-AEJA-GM-AEJA (Anhydro) |3	1009227		GM-GM-AEJA-GM-AEJA|2,GM-GM-AEJAA-GM-AEJ|2	127322	17.5	0.000242064	2342.98	2342.98	3.41816	2
1918	18.4742	19.0047	1918	0.997596	79	4;2;3	5	18.847	2788.19	2788.2015,2788.2015	GM-AEJAA-GM-AEJ-GM-AEJA|3,GM-AEJA-GM-AEJA-GM-AEJA|3	8088953		GM-AEJG-GM-AEJA (Anhydro) |2,GM-AEJGA-GM-AEJ (Anhydro) |2	98832	19.1181	0.000187899	1830.76	1830.76	0.200887	2
1968	19.1339	19.1613	1968	0.925846	3	3	3	19.1411	2788.2	2788.2015,2788.2015	GM-AEJAA-GM-AEJ-GM-AEJA|3,GM-AEJA-GM-AEJA-GM-AEJA|3	63450		M-AEJA-GM-AEJA|2,M-AEJAA-GM-AEJ|2	96833	16.6777	0.000184098	1661.72	1661.73	1.97425	2
1960	19.0426	19.1005	1960	0.970061	6	3	4	19.0741	2788.2	2788.2015,2788.2015	GM-AEJAA-GM-AEJ-GM-AEJA|3,GM-AEJA-GM-AEJA-GM-AEJA|3	85558		GM-AEJAA-GM-AEJA (Anhydro) |2	95253	21.1426	0.000181094	1915.81	1915.82	2.53554	2
1883	18.0734	18.1224	1883	0.912258	6	3	4	18.0976	2717.16	2717.1644,2717.1644,2717.1644	GM-AEJAA-GM-AEJ-GM-AEJ|3,GM-AEJA-GM-AEJ-GM-AEJA|3,GM-AEJ-GM-AEJA-GM-AEJA|3	54849		GM-AEJGA-GM-AEJA (Anhydro) |2	85583	19.7337	0.00016271	1901.8	1901.8	1.21945	2
1861	17.8527	18.0404	1861	0.992446	37	2;3	5	17.9374	2717.16	2717.1644,2717.1644,2717.1644	GM-AEJAA-GM-AEJ-GM-AEJ|3,GM-AEJA-GM-AEJ-GM-AEJA|3,GM-AEJ-GM-AEJA-GM-AEJA|3	833907		GM-AEJKR-GM-AEJA (Deacetyl) |2	31534	13.3083	5.99522e-05	2035.95	2035.95	3.66535	2
1907	18.2662	18.4924	1907	0.929545	36	3;2	5	18.3668	2717.16	2717.1644,2717.1644,2717.1644	GM-AEJAA-GM-AEJ-GM-AEJ|3,GM-AEJA-GM-AEJ-GM-AEJA|3,GM-AEJ-GM-AEJA-GM-AEJA|3	852875		GM-AEJAA-GM-AEJ-GM-AEJA|3,GM-AEJA-GM-AEJA-GM-AEJA|3	8237961	18.847	0.0156619	2788.19	2788.2	3.16411	3
2167	21.0973	21.1746	2167	0.932807	13	3;2	3	21.1426	1915.81	1915.8155	GM-AEJAA-GM-AEJA (Anhydro) |2	62372		GM-AEJAA-GM-AEJ-GM-AEJ|3,GM-AEJA-GM-AEJ-GM-AEJA|3,GM-AEJ-GM-AEJA-GM-AEJA|3	1741631	18.3668	0.00331117	2717.16	2717.16	1.94744	3
2134	20.8376	20.8967	2134	0.938542	6	2	3	20.871	1915.81	1915.8155	GM-AEJAA-GM-AEJA (Anhydro) |2	32881		GM-AEJAA-GM-AEJ-GM-AEJA (Anhydro) |3,GM-AEJA-GM-AEJA-GM-AEJA (Anhydro) |3	1121176	22.4062	0.00213157	2768.17	2768.18	2.14495	3
1710	16.4423	16.6056	1710	0.991625	32	3;2	3	16.5172	1935.84	1935.8417	GM-AEJAA-GM-AEJA|2	392650		GM-AEJKR-GM-AEJA-GM-AEJA|3	946180	17.5282	0.00179887	3001.35	3001.36	3.31692	3
1089	11.3647	11.4367	1089	0.993846	16	2;1	3	11.4005	1012.44	1012.4448	GM-AEJAA|1	300267		GM-AEJAA-GM-AEJ-GM-AEJ (Anhydro) |3,GM-AEJA-GM-AEJ-GM-AEJA (Anhydro) |3,GM-AEJ-GM-AEJA-GM-AEJA (Anhydro) |3	604518	21.6275	0.0011493	2697.13	2697.14	2.04651	3
1015	10.8163	10.9597	1015	0.988855	11	2	2	10.8793	941.406	941.4077	GM-AEJA|1	37458		GM-AEJKR-GM-AEJA-GM-AEJA (Anhydro) |3	486942	20.67	0.00092577	2981.33	2981.33	2.12598	3
1175	12.0273	12.1379	1175	0.990469	17	2	2	12.0695	941.405	941.4077	GM-AEJA|1	85529		GM-AEJGA-GM-AEJ-GM-AEJA|3,GM-AEJG-GM-AEJA-GM-AEJA|3	190947	17.7074	0.000363027	2774.18	2774.19	1.53902	3
1291	12.8046	12.8769	1291	0.993464	7	2	2	12.8477	941.405	941.4077	GM-AEJA|1	39943		GM-AEJA-GM-AEJ-GM-AEJ (Anhydro) |3,GM-AEJ-GM-AEJ-GM-AEJA (Anhydro) |3	128863	21.1608	0.000244993	2626.1	2626.1	1.73358	3
808	9.16773	9.44837	808	0.998874	43	2	3	9.28307	941.405	941.4077	GM-AEJA|1	5829142		GM-AEJA-GM-AEJ-GM-AEJ|3,GM-AEJ-GM-AEJ-GM-AEJA|3	127311	17.4363	0.000242043	2646.12	2646.13	1.7726	3
910	9.92924	10.6858	910	0.99263	166	1;2	3	10.0779	941.405	941.4077	GM-AEJA|1	196179496		GM-AEJGA-GM-AEJA-GM-AEJA|3	107984	18.2461	0.000205298	2845.22	2845.22	1.84053	3
1957	19.0238	19.242	1957	0.930938	23	2	4	19.1181	1830.76	1830.7627,1830.7628	GM-AEJG-GM-AEJA (Anhydro) |2,GM-AEJGA-GM-AEJ (Anhydro) |2	98832		GM-AEJKR-GM-AEJ-GM-AEJA|3	100463	17.0969	0.000190999	2930.32	2930.32	2.00499	3
1531	14.5567	14.7429	1531	0.977891	44	3;2	3	14.6632	1850.78	1850.7889,1850.789	GM-AEJG-GM-AEJA|2,GM-AEJGA-GM-AEJ|2	1653953		GM-AEJKR-GM-AEJ-GM-AEJA (Anhydro) |3	59410	20.2996	0.00011295	2910.29	2910.3	1.71971	3
1508	14.298	14.3726	1508	0.943904	12	3;2	4	14.3324	1850.78	1850.7889,1850.789	GM-AEJG-GM-AEJA|2,GM-AEJGA-GM-AEJ|2	462056		GM-AEJGA-GM-AEJA-GM-AEJA (Anhydro) |3	36716	21.7797	6.98042e-05	2825.19	2825.2	3.61946	3
1436	13.8639	13.9812	1436	0.976369	27	3;2	3	13.9236	1779.75	1779.7518	GM-AEJG-GM-AEJ|2	269461			525985833		1
1834	17.6344	17.7815	1834	0.957807	21	3	5	17.7074	2774.18	2774.1859,2774.1857999999997	GM-AEJGA-GM-AEJ-GM-AEJA|3,GM-AEJG-GM-AEJA-GM-AEJA|3	190947
2017	19.6695	19.7985	2017	0.931525	23	3;2	3	19.7337	1901.8	1901.7999	GM-AEJGA-GM-AEJA (Anhydro) |2	85583
2225	21.7692	21.7967	2225	0.958396	3	3	4	21.7797	2825.19	2825.1968	GM-AEJGA-GM-AEJA-GM-AEJA (Anhydro) |3	36716
1898	18.2033	18.2976	1898	0.963048	11	3	5	18.2461	2845.22	2845.223	GM-AEJGA-GM-AEJA-GM-AEJA|3	107984
1600	15.2553	15.4161	1600	0.980453	35	2;3	3	15.3084	1921.82	1921.8261	GM-AEJGA-GM-AEJA|2	906636
841	9.43155	9.56023	841	0.999351	22	2;1	3	9.49785	998.426	998.4292	GM-AEJGA|1	1097573
652	7.7716	8.03712	652	0.999391	51	2;1	3	7.90534	927.39	927.3919999999999	GM-AEJG|1	3262703
1562	14.8193	14.8628	1562	0.999963	3	2	3	14.8347	1134.54	1134.54047	GM-AEJKR (Anhydro) |1	537997
1877	17.9962	18.1649	1877	0.952327	31	3;2	4	18.0656	1986.9	1986.90027	GM-AEJKR-GM-AEJ (Anhydro) |2	432690
1914	18.4122	18.5227	1914	0.985639	16	3	5	18.466	1986.9	1986.90027	GM-AEJKR-GM-AEJ (Anhydro) |2	266787
2082	20.2801	20.362	2082	0.907951	8	4;3	5	20.2996	2910.29	2910.29717	GM-AEJKR-GM-AEJ-GM-AEJA (Anhydro) |3	59410
1770	17.0426	17.1945	1770	0.976864	32	3;4	5	17.0969	2930.32	2930.32337	GM-AEJKR-GM-AEJ-GM-AEJA|3	100463
1927	18.5687	18.7635	1927	0.996116	38	3;2	5	18.6557	2057.93	2057.93737	GM-AEJKR-GM-AEJA (Anhydro) |2	1421379
1950	18.9343	19.095	1950	0.966314	30	2;3	4	19.0014	2057.93	2057.93737	GM-AEJKR-GM-AEJA (Anhydro) |2	1522066
1356	13.2896	13.3297	1356	0.946743	6	3	4	13.3083	2035.95	2035.95307	GM-AEJKR-GM-AEJA (Deacetyl) |2	31534
2147	20.9215	21.0389	2147	0.950604	27	4;3	5	20.9804	2981.33	2981.33427	GM-AEJKR-GM-AEJA-GM-AEJA (Anhydro) |3	239116
2102	20.63	20.7242	2102	0.914236	19	4;3	5	20.67	2981.33	2981.33427	GM-AEJKR-GM-AEJA-GM-AEJA (Anhydro) |3	247826
1813	17.4502	17.6344	1813	0.976168	45	4;3	5	17.5282	3001.35	3001.36047	GM-AEJKR-GM-AEJA-GM-AEJA|3	906224
1765	16.9778	17.0426	1765	0.954623	7	4	4	17.0084	3001.36	3001.36047	GM-AEJKR-GM-AEJA-GM-AEJA|3	39956
1552	14.7155	14.9074	1552	0.986804	48	4;2;3	5	14.8123	2077.96	2077.96357	GM-AEJKR-GM-AEJA|2	19508939
1378	13.4417	13.5653	1378	0.941977	41	3;4	4	13.4956	2077.96	2077.96357	GM-AEJKR-GM-AEJA|2	244318
1491	14.1753	14.2204	1491	0.951919	4	4;3	3	14.1995	2077.96	2077.96357	GM-AEJKR-GM-AEJA|2	215099
1480	14.1189	14.3553	1480	0.991305	48	3;2	4	14.223	2006.92	2006.92647	GM-AEJKR-GM-AEJ|2	3788763
1305	12.9006	12.9795	1305	0.911889	15	3	3	12.9456	2006.92	2006.92647	GM-AEJKR-GM-AEJ|2	52159
1404	13.6128	13.6549	1404	0.944013	5	3;4	3	13.6358	2006.92	2006.92647	GM-AEJKR-GM-AEJ|2	24785
848	9.49237	9.74968	848	0.991452	63	3;2	3	9.6017	1154.56	1154.56667	GM-AEJKR|1	36844068
564	6.96421	7.21175	564	0.962079	37	3	4	7.07354	1154.56	1154.56667	GM-AEJKR|1	405222
581	7.1159	7.17716	581	0.986033	8	2	3	7.14001	870.368	870.3706	GM-AEJ|1	73373
517	6.31454	7.05721	517	0.999174	148	2;1	3	6.57924	870.368	870.3706	GM-AEJ|1	69479436
445	5.54059	5.90385	445	0.99621	54	2	3	5.6851	870.367	870.3706	GM-AEJ|1	2712319
799	9.06189	9.17364	799	0.997746	23	1	2	9.115	698.284	698.2858	GM-AE|1	134361
849	9.49237	9.75712	849	0.999994	34	1	2	9.61474	698.284	698.2858	GM-AE|1	7602748
1815	17.4502	17.5654	1815	0.940576	10	3	5	17.5	2342.98	2342.9845,2342.9845	GM-GM-AEJA-GM-AEJA|2,GM-GM-AEJAA-GM-AEJ|2	127322
1324	13.0581	13.1876	1324	0.995036	25	2	3	13.1185	1419.58	1419.5876	GM-GM-AEJA|1	200949
1080	11.2991	11.3815	1080	0.953682	9	2	3	11.3314	1348.55	1348.5505	GM-GM-AEJ|1	120683
244	3.45838	3.90057	244	0.99943	63	1	2	3.61888	498.205	498.2061	GM|0	19532674
129	2.61912	2.74714	129	0.99876	24	1	2	2.67913	498.205	498.2061	GM|0	489883
1772	17.037	17.0877	1772	0.946872	7	2	3	17.0625	1661.72	1661.7253,1661.7253	M-AEJA-GM-AEJA|2,M-AEJAA-GM-AEJ|2	29999
1715	16.5719	16.8903	1715	0.905457	30	2	3	16.6777	1661.72	1661.7253,1661.7253	M-AEJA-GM-AEJA|2,M-AEJAA-GM-AEJ|2	66834
726	8.50749	8.64731	726	0.996924	38	2;1	3	8.56862	738.326	738.3284	M-AEJA|1	251685
346	4.50876	4.65431	346	0.99592	32	2;1	3	4.56487	667.288	667.2913	M-AEJ|1	848828
1	1.66027	1.70855	1	0.999774	7	1	2	1.68821	227.221			131775
2	1.66027	1.69788	2	0.992499	7	1;2	2	1.68173	665.418			72824
3	1.66027	1.69051	3	0.999669	5	1	2	1.67809	295.136			72100
4	1.66027	1.66475	4	0.999221	3	1;2	2	1.66435	619.338			71032
5	1.66027	1.67388	5	0.987552	3	1	2	1.66967	265.836			20293
6	1.66943	1.69788	6	0.999462	3	1	2	1.68842	299.193			34621
7	1.66475	1.69051	7	0.993754	5	1	2	1.67293	304.847			309306
8	1.66027	1.67388	8	0.999927	5	1	2	1.67188	281.902			250455
9	1.66027	1.69788	9	0.996391	9	1	2	1.68559	234.161			328551
10	1.66943	1.69051	10	0.999997	4	1	2	1.67134	257.878			123764
11	1.66943	1.69788	11	0.999068	5	1	2	1.68094	282.14			72157
12	1.66943	1.69051	12	0.998673	3	1	2	1.68283	329.994			72976
13	1.66943	1.69051	13	0.999896	4	1	2	1.67473	222.98			247070
14	1.66943	1.69788	14	0.998837	6	1	2	1.68386	326			214919
15	1.66943	1.69788	15	0.999185	7	1	2	1.6817	327.906			263604
16	1.66943	1.69788	16	0.998988	6	1	2	1.6854	298.118			155167
17	1.66943	1.67388	17	0.998849	3	1	2	1.67104	274.951			73688
18	1.66943	1.67388	18	0.999997	3	1	2	1.66986	285.898			359958
19	1.66475	1.70855	19	0.999699	10	1	2	1.69949	390.195			1092825
20	1.66475	1.69051	20	0.995186	3	2	2	1.67553	682.443			24053
21	1.66943	1.67388	21	0.999535	3	1	2	1.67062	355.832			74823
22	1.66943	1.69788	22	0.999982	4	1	2	1.68001	248.962			50760
23	1.66027	1.69051	23	0.99704	4	1	2	1.67601	354.061			31616
24	1.66027	1.69051	24	0.999606	4	1	2	1.6804	278.15			61929
25	1.66475	1.69051	25	0.99623	3	2	3	1.67918	800.505			28121
26	1.66027	1.66943	26	0.968969	3	3	5	1.66648	3243.68			16448
27	1.66475	1.67388	27	0.997255	3	2	3	1.6697	577.89			75074
28	1.66943	1.69051	28	0.999936	4	1	2	1.67508	204.922			45415
29	1.67388	1.69051	29	0.999977	3	1	2	1.68394	220.146			55356
30	1.66943	1.69051	30	0.99995	3	1	2	1.68368	276.172			41044
31	1.66943	1.67388	31	0.999707	3	1	2	1.6709	252.899			34293
32	1.66943	1.70855	32	0.996221	4	1	2	1.7063	287.91			2108792
33	1.66027	1.69788	33	0.999963	6	1	2	1.68271	218.167			85043
34	1.66475	1.67388	34	0.996811	3	2	3	1.66954	554.875			39520
35	1.66943	1.69788	35	0.997168	4	1	2	1.68536	343.218			41067
36	1.68459	1.69788	36	0.999266	4	1	2	1.69187	238.14			65248
37	1.68459	1.69051	37	0.999046	3	1	2	1.6881	216.099			34934
38	1.69051	1.69788	38	0.999948	3	1	2	1.69533	326.192			17975
39	1.66475	1.69788	39	0.991258	4	2	2	1.6843	783.479			14637
40	1.66027	1.69051	40	0.999899	3	1	2	1.67595	283.198			53662
41	1.66475	1.66943	41	0.999675	3	1	2	1.6692	387.884			40457
42	1.69788	1.75908	42	0.995937	6	1	2	1.73941	429.904			31505042
43	1.70855	1.78378	43	0.960663	10	1	2	1.75045	837.827			58721144
44	1.70855	1.77555	44	0.987403	8	1	2	1.74482	633.866			48561880
45	1.70855	1.79201	45	0.970745	11	1	2	1.75324	769.84			58164232
46	1.70855	1.79201	46	0.971999	11	1	2	1.75387	701.853			64574640
47	1.70855	1.75908	47	0.984673	7	1	2	1.73992	565.879			30751926
48	1.70855	1.76733	48	0.938485	8	1	2	1.74526	973.801			38707076
49	1.70855	1.76733	49	0.950347	8	1	2	1.74498	1041.79			30311690
50	1.70855	1.75085	50	0.953931	4	1	2	1.73519	1109.78			20711938
51	1.70855	1.74261	51	0.949225	3	1	2	1.73476	1177.76			14158037
52	1.70855	1.78378	52	0.958193	10	1	2	1.75002	905.815			47602636
53	1.70855	1.75085	53	0.994695	3	1	2	1.73511	497.892			23888114
54	1.88298	3.51438	54	0.998962	246	1	2	2.7591	326			754901
55	1.89164	1.90029	55	0.999931	3	1	2	1.89522	267.92			701068
56	1.89164	6.47912	56	0.996795	1106	1	2	4.16221	234.161			654353
57	1.9091	3.51438	57	0.998824	255	1	2	2.72724	327.997			800001
58	1.90029	3.51438	58	0.99999	270	1	2	2.67209	228.208			157421
59	1.90029	2.08159	59	0.999995	12	1	2	1.98723	298.118			317771
60	1.90029	3.51438	60	0.915974	234	1	2	2.73778	227.224			278099
61	1.90029	1.93663	61	0.99527	5	1	2	1.91917	390.276			203047
62	1.9091	1.92637	62	0.911894	3	1	2	1.91701	276.934			151307
63	1.92637	3.51438	63	0.999999	422	1	2	2.82172	282.167			185160
64	2.00661	2.23112	64	0.999745	29	1	2	2.09495	209.072			11807490
65	2.00661	2.05068	65	0.997222	5	1	2	2.02764	329.994			208734
66	2.08159	2.1671	66	0.9986	11	1	2	2.11237	335.136			1403220
67	2.08159	2.16118	67	0.999422	7	1	2	2.11527	211.067			474196
68	2.12893	3.51438	68	0.999742	231	1	2	2.83632	370.092			268385
69	2.15233	3.49449	69	0.999601	228	1	2	2.80872	390.276			232379
70	2.11457	3.50515	70	0.997672	166	1	2	2.82319	329.994			217364
71	2.12893	2.18376	71	0.964907	4	1	2	2.15403	201.888			87284
72	2.15233	3.35597	72	0.999106	136	1	2	2.73265	238.141			205771
73	2.13756	2.16118	73	0.958825	4	1	2	2.1487	295.136			157403
74	2.14491	2.30123	74	0.999807	11	1	2	2.21963	276.171			133178
75	2.17861	3.50515	75	1	244	1	2	3.08526	220.084			512798
76	2.1926	2.59833	76	0.999935	49	1	2	2.39261	283.869			71006
77	2.18376	3.50515	77	0.999569	260	1	2	2.85441	298.118			374616
78	2.18376	3.50515	78	0.99977	219	1	2	2.87545	354.061			210789
79	2.21187	2.27271	79	0.996928	4	1	2	2.23759	256.239			115918
80	2.18376	3.49449	80	0.999593	250	1	2	2.54455	218.089			2865040
82	2.23112	2.27863	82	0.999216	4	1	2	2.25254	278.151			187784
83	2.2205	2.27271	83	0.997842	3	1	2	2.25209	271.163			199744
84	2.2205	2.79191	84	0.999523	49	1	2	2.53612	284.271			78253
85	2.23112	2.31585	85	0.999748	9	1	2	2.26983	216.11			119206
86	2.2205	2.26727	86	0.999696	3	1	2	2.24291	412.828			58257
87	2.27271	2.76816	87	0.996725	46	1	2	2.48491	380.838			110182
88	2.30123	2.36304	88	0.992781	5	3	2	2.32909	761.755			66034
89	2.30123	2.35164	89	0.999176	4	1	2	2.32527	398.338			64426
90	2.28997	2.59833	90	0.977132	28	1	2	2.44471	740.186			75818
91	2.31585	2.48295	91	0.996285	18	1	2	2.36769	271.163			210782
92	2.30839	2.35164	92	0.999044	3	1	2	2.33241	212.915			106836
93	2.33862	2.54872	93	0.99892	17	1	2	2.41883	348.848			66648
94	2.35164	2.80869	94	0.999293	58	1	2	2.57953	216.099			90358
95	2.35712	3.54435	95	0.999866	168	1	2	2.89433	278.151			181320
96	2.35712	2.58221	96	0.99519	18	1	2	2.47315	276.171			141552
97	2.33862	2.37388	97	0.999999	4	1	2	2.35765	213.082			53960
98	2.36304	2.37918	98	0.999459	3	1	2	2.36942	222.056			46704
99	2.35164	2.66593	99	0.998175	23	1	2	2.52419	295.136			153643
100	2.37388	2.41868	100	0.979092	5	2	3	2.39477	1352.38			65000
101	2.37918	2.40805	101	0.999409	5	1	2	2.39393	412.828			41534
102	2.38982	2.41337	102	0.999812	3	1	2	2.40428	212.915			75965
103	2.39719	2.52152	103	0.929966	14	1	2	2.45386	444.111			55519
104	2.38451	2.59833	104	0.996455	17	1	2	2.46314	398.338			62673
105	2.36853	2.42946	105	0.953003	4	3	2	2.40044	845.746			43402
106	2.37918	2.43538	106	0.999463	4	1	2	2.40541	226.229			41385
107	2.39719	2.45748	107	0.999913	6	1	2	2.42768	256.239			96312
108	2.4027	2.57079	108	0.999603	16	1	2	2.48904	279.887			37240
109	2.41337	2.58221	109	0.997788	12	1	2	2.50215	281.214			37843
110	2.41868	2.7128	110	0.999024	27	1	2	2.5644	372.089			44749
111	2.40805	2.52152	111	0.999997	9	1	2	2.46935	213.082			53463
112	2.40805	2.46283	112	0.999877	4	1	2	2.43847	356.058			29955
113	2.46283	2.55956	113	0.999995	10	1	2	2.49451	260.891			38359
114	2.46283	2.59833	114	0.999525	18	1	2	2.52116	202.095			94615
115	2.45195	2.56487	115	0.999299	6	1	2	2.50349	212.915			112859
116	2.46812	2.55422	116	0.999443	6	1	2	2.50678	201.91			47401
117	2.46283	2.49417	117	0.999853	3	1	2	2.48257	266.136			32955
119	2.50483	2.59833	119	0.999997	6	1	2	2.54962	254.26			34402
120	2.5156	2.58221	120	0.994603	4	1	2	2.55324	226.229			27199
121	2.55422	3.52331	121	0.987076	115	4	3	3.01254	935.774			150692
122	2.57079	2.60725	122	0.979594	5	1	2	2.59243	444.111			56095
123	2.58755	2.6132	123	0.999558	3	1	2	2.60322	412.827			26218
124	2.6132	2.73569	124	0.997442	14	1	2	2.66631	276.172			112125
125	2.59833	2.65471	125	0.999488	5	1	2	2.62429	256.239			100693
126	2.59338	2.6132	126	0.978433	3	1	2	2.60525	222.056			35904
127	2.59338	2.66593	127	0.99999	7	1	2	2.63131	260.891			36454
128	2.60725	2.73569	128	0.999758	15	1	2	2.67161	279.887			35524
130	2.61912	2.64881	130	0.999338	4	1	2	2.62969	212.915			132498
131	2.59833	2.64347	131	0.999972	3	1	2	2.6221	253.902			32457
132	2.63054	2.75856	132	0.999774	14	1	2	2.68821	283.892			41360
133	2.64347	3.45305	133	0.977584	93	1	2	3.08488	444.111			73544
134	2.63054	2.78599	134	0.988547	14	1	2	2.71593	740.186			64976
135	2.67145	2.69543	135	0.995159	3	1	2	2.68698	348.848			22362
136	2.68206	2.79191	136	0.999085	11	1	2	2.73526	212.915			147766
137	2.68206	2.69543	137	0.999999	3	1	2	2.68876	226.229			42181
138	2.65471	2.77261	138	0.999589	9	1	2	2.7187	281.213			33891
139	2.66022	2.80277	139	0.99985	14	1	2	2.73867	254.26			36574
140	2.69543	2.79191	140	0.9858	8	4	2	2.74256	799.758			39419
141	2.70136	2.73019	141	0.994851	4	1	2	2.71472	260.891			35991
142	2.69543	3.12924	142	0.999982	32	1	2	2.91224	251.151			34629
144	2.70136	2.7637	144	0.999955	9	1	2	2.72727	492.217			130396
145	2.69098	2.76816	145	0.999995	5	1	2	2.73116	256.239			86386
146	2.69098	2.7416	146	0.99998	3	1	2	2.71051	412.828			28077
147	2.72425	2.78153	147	0.956436	8	1	2	2.75052	222.056			44395
148	2.72425	2.75856	148	0.968399	5	1	2	2.74022	221.104			24823
149	2.75285	2.81422	149	0.996594	8	1	2	2.77985	372.089			38188
150	2.70687	2.81953	150	0.999834	10	1	2	2.7702	213.082			45791
151	2.75856	2.80869	151	0.999308	5	1	2	2.78413	305.234			34178
152	2.76816	2.82695	152	0.999991	12	1	2	2.79439	519.203			150512
153	2.77261	2.79191	153	0.993856	5	1	2	2.78185	497.221			58050
154	2.76816	2.82695	154	0.981235	5	1	2	2.7914	230.925			28459
155	2.77261	2.79191	155	0.999826	4	1	2	2.78322	279.887			28949
156	2.76816	2.80869	156	0.999984	3	1	2	2.78997	260.891			24797
157	2.79191	2.80869	157	0.990893	3	1	2	2.79915	226.229			31040
158	2.79745	2.90294	158	0.998584	18	1	2	2.84499	496.189			373754
159	2.79745	2.83818	159	0.999139	3	1	2	2.81308	256.239			84481
160	2.80869	2.85793	160	0.996104	5	1	2	2.83292	281.213			28244
161	2.79745	2.84389	161	0.999883	5	1	2	2.82336	285.143			115637
162	2.81422	2.82695	162	0.999453	3	1	2	2.8204	235.93			65193
163	2.79191	2.90294	163	0.999986	9	1	2	2.85337	398.338			52641
164	2.77261	3.35151	164	1	65	1	2	3.0452	276.172			111844
165	2.82695	2.87471	165	0.999364	7	1	2	2.84631	279.887			33706
166	2.83247	2.89208	166	0.999207	7	1	2	2.86393	284.27			53402
167	2.84389	3.20643	167	0.999677	43	1	2	3.02336	216.099			83894
168	2.84902	2.95968	168	0.999393	17	1	2	2.89392	274.127			429356
169	2.81953	2.99938	169	0.915655	17	1	2	2.92127	740.186			56041
170	2.84389	2.86406	170	0.972868	3	3	2	2.85345	761.823			31002
171	2.85347	3.0379	171	0.999588	12	1	2	2.93791	212.915			111130
172	2.86406	3.06996	172	0.988733	16	1	2	2.97547	216.951			24463
173	2.88616	3.04681	173	0.99509	21	1	2	2.96538	222.056			39734
174	2.89208	2.90884	174	0.999622	3	1	2	2.90104	226.229			33059
175	2.87471	2.90884	175	0.999832	4	1	2	2.88942	372.089			43107
176	2.86406	2.93302	176	0.999131	4	1	2	2.89385	235.931			108719
177	2.90884	3.06442	177	0.99974	19	1	2	2.9981	213.082			44593
178	2.9197	2.98792	178	0.999801	7	1	2	2.953	253.902			36879
179	2.9197	2.93836	179	0.998774	3	1	2	2.9276	317.108			58709
180	2.9197	2.94368	180	0.9989	3	1	2	2.93352	356.058			30703
181	2.90884	3.20111	181	0.999939	26	1	2	3.05934	281.213			38840
182	2.88063	2.97707	182	0.996042	8	1	2	2.93566	254.26			30619
183	2.94368	2.97707	183	0.998806	5	1	2	2.96242	372.089			32984
184	2.94901	3.3288	184	0.995359	41	1	2	3.11665	398.338			59662
185	2.94368	2.9656	185	0.999388	3	1	2	2.95357	226.229			35362
186	2.94368	2.97115	186	0.999854	3	1	2	2.95352	279.887			25947
187	2.94368	2.95432	187	0.999821	3	1	2	2.94913	267.97			25841
188	2.94901	2.97707	188	0.998919	3	1	2	2.9674	260.123			47291
189	2.98263	3.06996	189	0.999977	8	1	2	3.02857	300.114			31341
190	2.95968	2.99938	190	0.999446	4	1	2	2.98016	283.892			22330
191	2.93836	3.07532	191	0.999382	8	1	2	3.00824	256.239			72036
192	2.99383	3.02701	192	0.984364	4	4	2	3.0094	799.757			26498
193	2.99938	3.03256	193	0.997268	3	1	2	3.01678	226.229			38031
194	3.01045	3.49449	194	0.997909	49	1	2	3.25526	372.089			54811
195	3.00471	3.02701	195	0.980013	3	1	2	3.01567	279.887			24804
196	2.98263	3.03256	196	0.995307	3	1	2	3.00683	262.897			69201
197	3.03256	3.46901	197	0.999357	52	1	2	3.2745	253.902			55351
198	3.04236	3.37788	198	0.951892	33	1	2	3.20242	740.186			70076
199	3.01045	3.0585	199	0.999661	5	1	2	3.0368	254.26			31605
200	3.0379	3.1337	200	0.999279	7	1	2	3.08711	233.944			132272
201	3.06442	3.08123	201	0.980661	3	4	2	3.07519	799.756			30706
202	3.08123	3.11414	202	0.999809	4	1	2	3.09543	284.27			43474
203	3.0974	3.19576	203	0.999058	8	1	2	3.14199	213.082			40513
204	3.10879	3.12924	204	0.999441	3	1	2	3.12003	212.915			123854
205	3.11414	3.27338	205	0.999131	17	1	2	3.19493	300.114			32575
206	3.11414	3.19576	206	0.997907	11	1	2	3.15856	216.952			25034
207	3.13815	3.15	207	0.999871	3	1	2	3.14367	326.193			28326
208	3.15	3.3002	208	0.998447	17	1	2	3.22182	222.056			34547
209	3.12924	3.19023	209	0.991623	5	1	2	3.16091	242.937			20148
210	3.15	3.16677	210	0.99936	3	1	2	3.16058	256.959			31996
211	3.16087	3.21707	211	0.999991	6	1	2	3.18883	254.26			32901
212	3.16087	3.28957	212	0.999598	11	1	2	3.22501	212.915			133999
213	3.18292	3.26753	213	0.999274	6	1	2	3.22024	251.151			25328
214	3.19576	3.23385	214	0.999964	6	1	2	3.21289	233.944			156884
215	3.19023	3.22239	215	0.999908	3	1	2	3.20126	326.193			31384
216	3.19576	3.23385	216	0.998554	5	1	2	3.2122	356.059			39020
217	3.20643	3.23385	217	0.998597	3	1	2	3.22483	226.229			33707
218	3.20111	3.25122	218	0.999629	3	1	2	3.22412	267.97			22543
219	3.21707	3.27338	219	0.984813	5	1	2	3.23878	284.27			45360
220	3.23385	3.48705	220	0.995081	21	1	2	3.36428	281.213			34377
221	3.25122	3.44161	221	0.999002	26	2	3	3.33099	886.363			111282
222	3.24531	3.26753	222	0.999999	3	1	2	3.25875	213.082			35771
223	3.23977	3.27338	223	0.999206	6	1	2	3.25341	216.099			54248
224	3.26753	3.51438	224	0.999776	19	1	2	3.39524	233.943			183186
225	3.28424	3.3288	225	0.999386	4	1	2	3.30556	235.93			65495
226	3.26245	3.42301	226	1	14	1	2	3.35664	254.26			30818
227	3.3002	3.32288	227	0.992379	3	1	2	3.30942	262.897			79005
228	3.31144	3.48705	228	0.999549	15	1	2	3.39529	216.099			71315
229	3.27338	3.33623	229	0.989107	4	1	2	3.30737	226.229			31967
230	3.34191	3.47643	230	0.997251	14	1	2	3.40593	222.056			51117
231	3.34191	3.35597	231	0.9997	3	1	2	3.3503	326.193			27826
232	3.3288	3.39385	232	0.99951	4	1	2	3.3572	213.082			42028
233	3.34191	3.40567	233	0.999479	5	1	2	3.37968	212.915			140331
234	3.37256	3.40567	234	0.999916	3	1	2	3.3845	251.911			34435
235	3.38321	3.39975	235	0.9974	4	1	2	3.39153	276.172			99062
236	3.37256	3.41117	236	0.999973	3	1	2	3.39307	235.931			62521
237	3.36726	3.4171	237	0.996949	3	1	2	3.38597	226.229			37828
238	3.39975	3.45838	238	0.999994	10	1	2	3.42676	238.141			185205
239	3.39975	3.46901	239	0.945481	6	1	2	3.43118	398.338			42215
240	3.42301	3.48705	240	0.997922	6	1	2	3.45136	256.239			79404
241	3.43628	3.46901	241	0.907724	5	1	2	3.45629	740.185			68334
242	3.45305	3.965	242	0.999854	74	1	2	3.61905	520.187			25435046
243	3.43628	3.47643	243	0.994626	4	1	2	3.46064	276.172			99708
245	3.44161	3.49449	245	0.999832	4	1	2	3.47297	212.915			128552
246	3.48705	3.80871	246	0.99706	39	1;2	2	3.62306	536.151			1750234
247	3.51438	3.64132	247	0.958114	6	1	2	3.58419	551.116			442663
248	3.65421	6.4355	248	0.999986	380	1	2	4.99033	227.224			217815
249	3.68741	3.73634	249	0.971995	5	1	2	3.70931	551.117			160483
250	3.68741	6.39801	250	0.998718	442	1	2	5.02196	327.997			572181
251	3.68741	6.41443	251	0.999684	450	1	2	5.03459	370.093			296096
252	3.68741	6.4355	252	0.999755	854	1	2	5.04774	282.167			204366
253	3.69332	6.40697	253	0.999806	540	1	2	5.04006	298.118			354464
254	3.70644	5.30573	254	0.998732	190	1	2	4.46693	329.994			193002
255	3.67054	3.74206	255	0.991941	7	4	2	3.70869	935.774			184778
256	3.70644	6.39801	256	0.998926	443	1	2	5.02151	326			584158
257	3.71236	6.38907	257	0.99894	439	1	2	5.01618	390.276			186378
258	3.71778	6.37843	258	0.999114	418	1	2	5.04907	218.166			182753
259	3.70644	6.42511	259	0.999997	512	1	2	5.09726	228.208			123073
260	3.71778	6.38907	260	0.997377	434	1	2	5.02182	354.061			220523
261	3.71778	6.37843	261	0.999937	462	1	2	4.88128	220.084			605161
262	3.67054	4.68564	262	0.999997	117	1	2	4.17344	278.151			165542
263	3.71778	3.75285	263	0.999913	3	1	2	3.73363	276.172			101125
264	3.74752	4.38174	264	0.999984	88	1	2	4.07796	233.944			230029
265	3.76064	3.965	265	0.999988	31	1	2	3.84014	236.079			414509
266	3.74752	3.87247	266	0.999673	9	1	2	3.80784	212.915			166105
267	3.7252	3.78536	267	0.955364	4	3	2	3.75155	761.706			63794
268	3.74752	3.90057	268	0.997667	16	1	2	3.82286	372.072			48010
269	3.76064	3.82674	269	0.968938	5	1	2	3.78521	444.111			65242
270	3.7725	5.48605	270	0.999322	230	1	2	4.66358	253.902			93726
271	3.78536	3.80134	271	0.997332	4	1	2	3.79283	281.213			26874
272	3.80134	3.90057	272	0.999074	10	1	2	3.84886	238.141			190268
273	3.80871	4.02021	273	0.999206	17	1	2	3.89949	256.239			104203
274	3.82674	4.05969	274	0.998146	42	1	2	3.9289	496.189			502316
275	3.76658	4.22349	275	0.999897	38	1	2	3.999	216.099			70499
276	3.7725	3.78536	276	0.99865	3	1	2	3.78032	226.229			39717
277	3.80134	4.32009	277	0.995008	52	1	2	4.05403	740.185			70772
278	3.80871	3.90948	278	0.998009	8	1	2	3.85368	254.26			31737
279	3.82674	4.25175	279	0.999645	67	1	2	3.94485	518.171			160268
280	3.80134	3.83819	280	0.999746	3	1	2	3.82018	251.91			27746
281	3.80134	3.84897	281	0.999455	3	1	2	3.82715	276.172			105079
282	3.77987	3.8208	282	0.999958	3	1	2	3.80057	235.93			62308
283	3.83819	3.98179	283	0.997521	26	2	3	3.90972	892.362			185491
285	3.82674	3.87247	285	0.999852	5	1	2	3.85597	226.229			37543
286	3.86381	3.90948	286	0.979491	5	1	2	3.89006	444.111			61725
287	3.86381	3.94575	287	0.995723	7	1	2	3.89764	731.293			69539
288	3.88863	4.27678	288	0.999503	40	1	2	4.11166	281.214			39415
289	3.92154	4.25707	289	0.998526	41	1	2	4.09002	276.172			108943
290	3.94129	4.08715	290	0.995833	11	1	2	4.01144	254.26			31739
291	3.93238	5.43842	291	0.999572	188	1	2	4.62837	238.141			202343
292	3.91394	3.94575	292	0.999076	3	1	2	3.93077	212.915			153304
293	3.92721	4.26786	293	0.997856	30	1	2	4.13506	280.908			49920
294	3.93238	4.39979	294	0.996663	41	1	2	4.19112	372.09			53499
295	3.95167	4.06563	295	0.998669	11	1	2	4.01162	326.193			26814
296	3.94575	4.13763	296	0.999885	13	1	2	4.03598	222.056			44815
297	3.95167	4.04271	297	0.999187	8	1	2	3.99305	251.151			26929
298	3.965	4.03088	298	0.999158	8	1	2	3.99845	226.229			33074
299	3.97587	4.03088	299	0.946676	7	1	2	4.00586	230.925			35835
300	3.97054	4.12619	300	0.996818	14	1	2	4.03991	444.112			71134
301	3.93238	4.0368	301	0.999619	8	1	2	3.99383	235.931			65609
302	3.99799	4.08715	302	0.99993	6	1	2	4.03431	213.081			35272
303	4.02021	4.04271	303	0.999801	3	1	2	4.03482	284.271			69759
304	3.98732	4.0368	304	0.999838	5	1	2	4.01086	256.96			37779
305	4.03088	4.12619	305	0.999985	6	1	2	4.0814	356.058			38532
306	4.05414	4.09287	306	0.999247	4	1	2	4.0755	259.095			35360
307	4.07116	4.08183	307	0.935097	3	6	3	4.07625	1775.44			25400
308	4.09287	4.17005	308	0.998819	5	1	2	4.12692	284.27			65288
309	4.10386	4.16559	309	0.994181	7	1	2	4.13215	226.229			31406
310	4.10386	4.19505	310	0.998911	6	1	2	4.14196	251.91			19131
311	4.12619	4.24088	311	0.999925	9	1	2	4.17994	213.082			40426
312	4.12065	4.14909	312	0.973826	3	4	2	4.13421	799.757			26092
313	4.1094	4.21795	313	0.970897	6	1	2	4.16906	398.339			41765
314	4.1094	4.44427	314	0.997827	29	1	2	4.26815	256.239			98570
315	4.16044	4.8541	315	0.957646	63	1	2	4.4896	444.112			68163
316	4.17005	4.47929	316	0.999323	28	1	2	4.31921	251.151			29782
317	4.18467	4.26786	317	0.971395	8	4	2	4.22491	799.757			26161
318	4.17451	4.39979	318	0.999999	17	1	2	4.30315	222.056			40577
319	4.16044	4.19505	319	0.989926	3	1	2	4.18014	254.26			25709
320	4.19505	4.27678	320	0.999915	6	1	2	4.23686	212.915			146125
321	4.20651	4.25707	321	0.999801	5	1	2	4.23782	356.059			37046
322	4.22942	4.24088	322	0.999354	3	1	2	4.23565	235.931			72553
323	4.23496	4.33151	323	0.999585	9	1	2	4.28115	254.26			36286
324	4.25175	4.37582	324	0.996434	13	1	2	4.30516	252.074			93949
325	4.26281	4.5708	325	0.99975	25	1	2	4.41704	216.099			70688
326	4.22942	4.30309	326	0.999783	6	1	2	4.26426	326.193			33498
327	4.28989	4.39979	327	0.998179	11	1	2	4.34007	276.172			98227
328	4.28989	4.3699	328	0.999938	5	1	2	4.32641	356.058			37558
329	4.31455	4.3699	329	0.999328	5	1	2	4.34102	235.931			67369
330	4.32598	4.46614	330	0.99737	13	1	2	4.39505	226.229			44337
331	4.30309	4.34761	331	0.944917	3	6	3	4.32912	1775.4			21003
332	4.32598	4.43876	332	0.999897	10	1	2	4.3879	281.214			33662
333	4.35207	4.92229	333	0.996969	54	1	2	4.63098	740.186			80582
334	4.35653	4.59058	334	0.999972	20	1	2	4.46437	280.907			43423
335	4.37582	4.47185	335	0.999445	7	1	2	4.42642	212.915			165505
336	4.37582	4.42771	336	0.999402	6	1	2	4.39562	284.27			63006
337	4.37582	4.42771	337	0.994798	4	1	2	4.39618	326.193			27370
338	4.36544	4.42771	338	0.999701	4	1	2	4.39569	254.224			35968
339	4.39979	4.46614	339	0.999183	6	1	2	4.42954	202.074			193249
340	4.40571	4.59058	340	0.999641	27	1	2	4.48481	236.079			360256
341	4.42771	6.41443	341	0.999925	285	1	2	5.46709	233.943			269739
342	4.44427	4.55937	342	0.999752	12	1	2	4.50187	372.089			51553
343	4.4496	4.46614	343	0.996872	3	1	2	4.45955	222.056			30850
344	4.4496	4.46614	344	0.999878	3	1	2	4.45635	235.931			47742
345	4.4848	4.59058	345	0.998533	10	1	2	4.53635	256.239			104281
347	4.4848	4.5422	347	0.977024	4	1	2	4.51335	254.26			29679
348	4.50876	4.60395	348	0.999397	11	1	2	4.5599	222.1			81875
349	4.51445	4.5708	349	0.997834	8	1	2	4.54212	281.213			33942
350	4.51959	4.54772	350	0.999624	3	1	2	4.53131	212.915			138393
351	4.5255	5.44389	351	0.996582	97	1	2	4.96091	295.136			154466
352	4.59842	4.6373	352	0.912585	5	7	3	4.61901	1651.55			38932
353	4.6205	4.84265	353	0.998332	16	1	2	4.7111	254.223			33468
354	4.62604	5.03412	354	0.998197	34	1	2	4.83449	256.239			100943
355	4.60929	4.65962	355	0.999188	6	1	2	4.63117	276.172			96333
356	4.60395	4.78661	356	0.998537	18	1	2	4.6815	372.089			44023
357	4.59842	4.68012	357	0.995509	5	1	2	4.64421	251.151			25885
358	4.62604	5.40347	358	0.998253	76	1	2	5.01969	280.908			52627
359	4.6205	4.79196	359	0.999878	11	1	2	4.70361	281.213			32434
360	4.6373	4.7243	360	0.996393	6	1	2	4.67952	518.13			31160
361	4.65962	4.68012	361	0.999333	3	1	2	4.671	212.915			151626
362	4.65962	4.71285	362	0.999815	5	1	2	4.68746	222.056			29957
363	4.6205	4.83693	363	0.999945	14	1	2	4.73951	216.099			66436
364	4.64876	4.69098	364	0.999988	3	1	2	4.66978	213.082			28725
365	4.69098	4.72981	365	0.999664	5	1	2	4.71356	356.058			37251
367	4.68012	4.7243	367	0.973897	3	4	2	4.70114	879.683			22776
368	4.71837	5.02861	368	0.999857	40	1	2	4.88612	278.151			132827
369	4.76476	4.78661	369	0.999339	3	1	2	4.77808	212.915			160645
370	4.78111	4.80931	370	0.999719	3	1	2	4.79883	235.93			62260
371	4.78111	4.80339	371	0.999961	3	1	2	4.79293	518.131			33122
372	4.78661	4.80339	372	0.99899	4	1	2	4.79447	276.172			93518
373	4.71837	4.96158	373	0.999	19	1	2	4.84695	251.152			33102
374	4.77047	4.90399	374	0.968495	15	2	3	4.84851	1042.45			108624
375	4.80339	4.83158	375	0.993158	3	1	2	4.82006	226.229			29332
376	4.80931	4.84857	376	0.999992	3	1	2	4.83368	222.056			44848
377	4.83693	5.03412	377	0.999145	18	1	2	4.93772	276.172			113213
378	4.84857	4.91143	378	0.999361	6	1	2	4.87556	212.915			163779
379	4.86003	5.03946	379	0.9984	17	1	2	4.93902	372.09			47893
380	4.8541	4.9669	380	0.998063	6	1	2	4.90921	356.057			34585
381	4.87087	4.92801	381	0.999043	4	1	2	4.89487	262.897			108662
382	4.8815	4.93394	382	0.999867	4	1	2	4.91395	326.194			31244
383	4.88741	4.92229	383	0.999212	4	1	2	4.90338	254.26			32412
384	4.88741	4.97223	384	0.994643	9	1	2	4.92929	281.214			32309
385	4.89334	4.91143	385	0.999976	3	1	2	4.90211	216.099			52296
386	4.88741	4.97815	386	0.990904	9	1	2	4.93684	444.112			56534
387	4.84265	4.93394	387	0.998639	5	1	2	4.8728	252.074			56691
388	4.92801	4.97223	388	0.999032	4	1	2	4.94956	226.229			33592
389	4.95092	5.13786	389	0.993878	25	2	3	5.04663	998.463			179261
390	4.95625	4.97223	390	0.980747	4	1	2	4.9639	740.186			60127
391	4.95092	5.03946	391	0.999957	9	1	2	4.98697	216.099			48654
392	4.95625	5.02861	392	0.999067	8	1	2	4.99597	212.915			153636
393	4.9669	5.08021	393	0.999997	9	1	2	5.02428	518.13			40564
394	4.98879	5.20316	394	0.986332	35	2	2	5.08097	869.384			194972
395	4.99431	5.08021	395	0.999188	12	1	2	5.03833	795.384			75992
396	5.00574	5.15611	396	0.992288	27	1	2	5.07657	666.305			111504
397	5.01146	5.07468	397	0.99857	7	1	2	5.0336	281.213			32164
398	5.0229	5.05541	398	0.997827	4	1	2	5.03591	356.057			34415
399	5.03412	5.06131	399	0.999195	5	1	2	5.04572	666.166			28920
400	5.04478	5.06876	400	0.987271	3	2	2	5.05465	907.332			59624
401	5.02861	5.46955	401	0.976918	31	1	2	5.24635	444.112			70510
402	5.03946	6.14352	402	0.952766	93	1	2	5.58598	740.186			75980
403	5.06131	5.36254	403	0.999112	25	1	2	5.21322	278.151			133744
404	5.02861	5.16676	404	0.999847	12	1	2	5.10846	254.224			31486
405	5.08021	5.09695	405	0.999523	3	1	2	5.08693	372.09			47199
406	5.07468	5.26519	406	0.997513	20	1	2	5.18102	256.239			98256
407	5.08611	5.1974	407	0.999593	8	1	2	5.13651	276.172			99054
408	5.08611	5.20316	408	0.999459	11	1	2	5.14467	216.1			65234
409	5.10841	5.13786	409	0.997328	4	1	2	5.12126	251.151			22097
410	5.11433	5.16676	410	0.997601	7	2;3	3	5.12868	907.33			325233
411	5.11985	5.14337	411	1	4	1	2	5.13302	281.213			39097
412	5.10841	5.17267	412	0.999994	4	1	2	5.13858	326.193			35517
413	5.11985	5.14874	413	0.976187	3	1	2	5.13267	666.168			28004
414	5.13786	5.27666	414	0.99929	10	1	2	5.20229	212.915			167414
415	5.15611	5.22466	415	0.998725	10	1	2	5.19248	372.089			45289
416	5.17267	5.18594	416	0.996471	3	1	2	5.17951	226.229			29231
417	5.16676	5.6409	417	0.999817	70	1	2	5.48532	518.171			610201
418	5.18594	5.30043	418	0.999805	6	1	2	5.23982	262.897			126779
419	5.19187	5.23533	419	0.999062	3	1	2	5.21284	213.082			33504
420	5.21403	5.24125	420	0.998796	3	1	2	5.22747	666.166			32097
421	5.21403	5.36254	421	0.999877	12	1	2	5.27912	254.26			30230
422	5.21934	5.25742	422	0.99997	4	1	2	5.23538	356.058			34299
423	5.1974	5.40347	423	0.999639	16	1	2	5.3104	281.214			37795
424	5.21934	5.23533	424	0.997764	3	1	2	5.2276	221.104			19786
425	5.23533	5.2822	425	0.998878	4	1	2	5.25571	276.172			92527
426	5.23533	5.43842	426	0.999998	14	1	2	5.31957	216.1			58567
427	5.25189	5.38524	427	0.998324	10	1	2	5.31642	226.229			38028
428	5.25742	5.47487	428	0.994561	18	1	2	5.34642	372.089			50509
429	5.25189	5.39264	429	0.997007	9	1	2	5.32956	251.151			28924
430	5.28955	5.34601	430	0.999872	5	1	2	5.31067	222.056			41986
431	5.31638	5.37438	431	0.999214	5	1	2	5.34234	212.915			157789
432	5.30043	5.37991	432	0.998927	5	1	2	5.34587	256.239			100679
433	5.31638	5.36254	433	0.996654	3	1	2	5.3363	276.172			90339
434	5.34601	6.33131	434	0.996783	118	1	2	5.8878	329.994			163796
435	5.36254	5.66276	435	0.999054	45	1	2	5.49465	496.189			1423572
437	5.42537	5.46955	437	0.976951	3	1	2	5.44592	254.26			34798
438	5.44922	5.48605	438	0.987309	4	1	2	5.4737	278.151			124773
439	5.46955	5.54652	439	0.998957	6	1	2	5.50932	276.171			100578
440	5.50406	5.51733	440	0.999977	3	1	2	5.51098	212.915			143202
441	5.52324	6.36629	441	0.998569	112	1	2	5.98986	253.902			93001
442	5.52916	5.61244	442	0.999983	5	1	2	5.56072	280.907			38364
443	5.51185	5.5918	443	0.999998	5	1	2	5.55105	254.26			38439
444	5.51733	5.5918	444	0.99997	4	1	2	5.5491	281.214			37511
446	5.54652	5.58115	446	0.999326	5	1	2	5.56149	278.151			147814
447	5.55246	5.62308	447	0.999993	6	1	2	5.58587	216.099			61109
448	5.55246	6.38907	448	0.996876	68	1	2	6.02202	372.089			50328
450	5.58115	5.60102	450	0.99922	4	1	2	5.59001	238.141			199684
451	5.61244	5.7423	451	0.97441	19	2	3	5.67639	908.315			146106
452	5.63372	5.66824	452	0.999975	4	1	2	5.64908	256.239			83446
453	5.62308	5.66824	453	0.999569	4	1	2	5.65113	212.915			163395
454	5.6409	5.65704	454	0.996168	3	1	2	5.64956	278.151			117370
455	5.63372	5.70305	455	0.999237	4	1	2	5.66285	235.931			51996
456	5.6409	5.69164	456	0.97789	3	2	3	5.67396	1007.43			89946
457	5.67981	6.37843	457	0.999313	76	1	2	6.04942	295.136			150755
458	5.66824	6.20567	458	0.99997	54	1	2	5.94209	280.908			41878
459	5.70305	6.03366	459	0.997403	23	1	2	5.85666	256.239			102694
460	5.72553	5.73696	460	0.99859	3	2	3	5.73139	1007.43			58584
461	5.69164	5.81141	461	0.990989	13	2	2	5.76026	956.452			77582
462	5.71368	5.8593	462	0.999992	14	1	2	5.79147	238.141			201391
463	5.73696	6.34501	463	1	72	1	2	6.06461	278.151			146317
464	5.71961	5.89792	464	0.91422	11	1	2	5.81399	254.261			31500
465	5.75355	5.78931	465	0.99989	3	1	2	5.76757	262.897			112496
466	5.71961	6.06812	466	0.999203	28	1	2	5.90394	216.1			52540
467	5.76685	5.79485	467	0.993739	3	1	2	5.77735	326.193			24359
468	5.77278	6.07404	468	0.999396	46	2	3	5.91594	984.411			337171
469	5.75355	5.88134	469	0.999992	8	1	2	5.82083	226.229			42515
470	5.7834	6.29225	470	0.992811	46	1	2	6.07003	444.112			70073
471	5.7834	5.80017	471	0.987296	3	1	2	5.79137	281.213			23390
472	5.78931	5.81733	472	0.984988	3	1	2	5.80211	221.104			19974
473	5.80549	5.892	473	0.999534	6	1	2	5.8472	212.915			159541
474	5.81733	5.97957	474	0.992984	20	1	2	5.90476	781.332			150428
475	5.79485	5.892	475	0.999724	8	1	2	5.84349	276.172			95082
476	5.83559	5.90385	476	0.954795	6	2	3	5.87754	1022.36			109471
477	5.84684	5.8593	477	0.999968	3	1	2	5.85496	222.056			35116
478	5.84113	6.05211	478	0.999901	18	1	2	5.94903	281.213			34336
479	5.89792	6.30708	479	0.999996	42	1	2	6.12026	238.141			196934
480	5.90385	5.93328	480	0.995362	3	1	2	5.91815	326.193			25905
481	5.93328	6.11928	481	0.998525	12	1	2	6.03124	254.26			35891
482	5.94454	6.06278	482	0.997316	9	1	2	6.00028	276.172			99723
483	5.94454	5.97365	483	0.999284	3	1	2	5.95646	212.915			147255
484	5.94454	5.97957	484	0.982521	3	2	3	5.96508	1022.36			42812
485	5.97957	6.0392	485	0.999988	5	1	2	6.01087	300.114			35517
486	5.99142	6.03366	486	0.998723	5	1	2	6.0116	226.229			33513
487	6.02328	6.06812	487	0.99934	6	1	2	6.03954	212.915			181189
488	5.97957	6.05745	488	0.999835	7	1	2	6.02702	251.151			32648
489	6.03366	6.18784	489	0.999999	16	1	2	6.11916	398.338			46757
490	6.07404	6.34501	490	0.999138	29	1	2	6.21199	256.239			100073
491	6.05745	6.21605	491	0.999917	18	1	2	6.14734	222.1			54311
492	6.04657	6.10591	492	0.967113	6	2	3	6.09036	795.383			59880
493	6.10145	6.20121	493	0.998385	8	1	2	6.15242	276.172			98620
494	6.10591	6.32009	494	0.999799	21	1	2	6.21973	281.213			31888
495	6.10591	6.26996	495	0.999114	12	1	2	6.18512	212.915			162382
496	6.10145	6.15474	496	0.999262	4	1	2	6.12368	284.271			66562
497	6.10145	6.17823	497	0.999987	5	1	2	6.1357	356.058			33794
498	6.11483	6.15474	498	0.967783	3	4	2	6.13542	799.757			26678
499	6.14883	6.16659	499	0.980751	4	2	2	6.15808	795.384			35330
500	6.16659	6.19229	500	1	5	1	2	6.17997	216.1			47208
501	6.15474	6.36629	501	0.940882	19	1	2	6.24667	254.26			40053
502	6.15474	6.18784	502	0.998826	3	1	2	6.17208	213.082			38267
503	6.19229	6.35565	503	0.974145	18	1	2	6.26551	740.186			70833
504	6.19229	6.25165	504	0.99659	5	1	2	6.22004	226.229			37897
505	6.17823	6.22749	505	1	4	1	2	6.20271	251.151			26109
506	6.22195	6.26996	506	0.99992	8	1	2	6.2486	216.1			58837
507	6.23872	6.38907	507	0.999868	13	1	2	6.29392	280.907			48367
508	6.25165	6.30708	508	0.999999	7	1	2	6.27796	222.056			39869
509	6.26479	6.31454	509	0.999974	4	1	2	6.28273	251.151			31893
510	6.24426	6.34501	510	0.997542	8	1	2	6.29745	276.172			100250
511	6.27442	6.32541	511	0.998428	4	1	2	6.29521	284.271			75746
512	6.28333	6.30708	512	0.954819	3	1	2	6.29541	221.105			20025
513	6.2967	6.38907	513	0.999628	7	1	2	6.33161	216.1			65870
514	6.29225	6.35565	514	0.999927	5	1	2	6.32123	208.084			45280
515	6.28779	6.36629	515	0.998222	6	1	2	6.321	226.229			33564
516	6.27442	6.28779	516	0.999981	3	1	2	6.27972	326.193			36488
518	6.32541	6.34501	518	0.982887	3	1	2	6.33476	444.111			56698
520	6.31454	6.38907	520	0.999192	5	1	2	6.35126	212.915			151228
521	6.33724	7.06312	521	0.990046	87	2	3	6.58699	908.315			11456057
522	6.37843	6.4355	522	0.995411	7	2	3	6.41046	998.462			276189
523	6.37843	6.88375	523	0.999479	90	2;1	2	6.5763	892.35			4695894
524	6.37843	6.47048	524	0.997512	7	2	3	6.44714	946.262			771261
525	6.40697	6.47048	525	0.986893	3	2	2	6.45173	930.297			380303
526	6.54885	6.60916	526	0.98922	3	1	2	6.58287	689.271			1066551
527	6.64384	6.83615	527	0.983942	13	2	3	6.70166	946.261			669260
528	6.66127	6.77414	528	0.970407	5	2	2	6.69383	894.325			297569
529	6.66991	8.3921	529	0.999786	451	1	2	7.50681	234.161			635676
530	6.6873	6.81882	530	0.990617	9	2	2	6.73769	930.297			367466
531	6.71916	8.35204	531	0.99747	497	1	2	7.5268	282.167			248769
532	6.71198	8.3413	532	0.998011	269	1	2	7.49199	370.093			270058
533	6.76519	8.08245	533	0.999946	170	1	2	7.33765	233.944			246729
534	6.77414	6.86493	534	0.984637	8	2	2	6.81363	957.4			151459
535	6.77414	8.35204	535	0.999794	311	1	2	7.47599	228.208			109307
536	6.77414	8.32768	536	0.998738	265	1	2	7.53805	327.997			523967
537	6.77414	8.32768	537	0.998037	258	1	2	7.53692	325.999			502249
538	6.783	8.03168	538	1	234	1	2	7.39026	298.118			334846
540	6.76519	8.35204	540	0.99968	244	1	2	7.56777	227.224			174493
541	6.79609	8.32768	541	0.998849	245	1	2	7.54186	390.276			166768
542	6.79609	7.94173	542	0.9988	143	1	2	7.37246	329.994			176512
543	6.79609	6.97604	543	0.969213	20	1	2	6.89043	740.185			66117
544	6.80763	7.01662	544	0.995133	14	1	2	6.90737	281.213			35857
545	6.79609	8.3413	545	0.999455	241	1	2	7.4866	354.062			200605
546	6.81882	6.95274	546	0.998565	16	1	2	6.8868	639.247			114646
547	6.83066	7.84104	547	0.999303	171	1	2	7.35422	218.166			157531
548	6.83066	7.84104	548	0.999927	154	1	2	7.36424	220.146			109940
549	6.8469	6.88375	549	0.99917	4	1	2	6.86784	212.915			156800
550	6.8469	7.84104	550	0.997826	133	1	2	7.34419	253.902			79553
551	6.8469	7.19436	551	0.999865	25	1	2	6.99839	256.239			92979
552	6.83066	7.00474	552	0.999595	12	1	2	6.91101	280.907			44014
553	6.80763	7.05129	553	1	20	1	2	6.9495	372.09			44327
554	6.83066	6.93534	554	0.999602	7	1	2	6.89752	238.141			186326
555	6.88375	6.91862	555	0.999695	3	1	2	6.89862	278.151			103581
556	6.90794	6.94127	556	0.999536	4	1	2	6.91936	226.229			31728
557	6.91329	6.99583	557	0.999968	9	1	2	6.95751	295.136			116442
558	6.91862	6.98692	558	0.997969	8	1	2	6.95658	370.85			35804
559	6.90263	6.94127	559	0.999829	4	1	2	6.92525	216.099			46500
560	6.93534	6.97013	560	0.919146	3	5	3	6.94744	1490.24			33118
561	6.94719	7.00029	561	0.998993	5	1	2	6.9767	254.26			33143
562	6.95274	7.29054	562	0.996211	54	2	3	7.1014	1113.49			644919
563	6.95866	6.99137	563	0.999591	4	1	2	6.97625	278.151			107042
565	6.95866	6.99583	565	0.986204	5	1	2	6.976	444.111			54638
567	6.97604	7.02768	567	0.999642	7	1	2	7.00156	226.229			35983
568	6.97604	6.99583	568	0.999482	4	1	2	6.98836	216.1			53407
569	6.98692	7.21175	569	0.999994	41	1;2	2	7.0992	910.411			178902
570	6.97604	7.02768	570	0.999441	4	1	2	7.00576	238.141			196299
571	6.98159	7.1576	571	0.999466	9	1	2	7.06847	212.915			139947
572	6.99583	7.02768	572	0.999871	4	1	2	7.01168	235.93			72647
573	7.00474	7.41689	573	0.994838	43	1	2	7.22597	740.186			73263
574	7.03514	7.23918	574	0.999179	18	1	2	7.1573	216.1			59055
575	7.05129	7.15208	575	0.95536	12	3;2	3	7.09729	1151.44			104557
576	7.07376	7.10464	576	0.990941	4	1	2	7.09334	281.213			35432
577	7.06312	7.1159	577	0.998207	3	1	2	7.09418	278.151			116126
578	7.08457	7.14617	578	0.995322	5	1	2	7.11551	280.907			30193
579	7.10464	7.1159	579	0.999727	3	1	2	7.10858	254.224			30259
580	7.10464	7.1576	580	0.977845	4	2	2	7.12634	908.314			31945
582	7.14066	7.82144	582	0.999935	89	1	2	7.51128	238.141			200429
583	7.15208	7.32417	583	0.999864	14	1	2	7.24954	295.136			136651
584	7.1159	7.18288	584	0.992398	4	1	2	7.15163	444.111			70925
585	7.14066	7.84104	585	0.99659	70	1	2	7.46746	372.09			46635
586	7.1159	7.98137	586	0.999768	124	1	2	7.53771	276.172			103174
587	7.1576	7.19436	587	0.999927	4	1	2	7.17409	254.26			27016
588	7.14066	7.21175	588	0.999582	7	1	2	7.17957	326.193			31535
589	7.14617	7.64448	589	0.999816	46	1	2	7.39956	281.214			40678
590	7.16825	7.25598	590	0.9915	6	1	2	7.21359	222.056			30009
591	7.20029	7.25598	591	0.999493	5	1	2	7.2266	212.915			111849
592	7.21175	7.7903	592	0.998731	79	1	2	7.48841	278.151			124868
593	7.22262	7.30735	593	0.998436	10	1	2	7.2637	280.908			25828
594	7.23918	7.36593	594	0.995664	13	1	2	7.30011	444.112			64004
595	7.22855	7.26679	595	0.99805	4	1	2	7.25548	256.96			87938
596	7.23918	7.29646	596	0.999821	5	1	2	7.27218	254.26			33105
597	7.26173	7.2757	597	0.99832	3	1	2	7.26927	326.193			21493
598	7.27124	7.31328	598	0.999075	4	1	2	7.28614	277.105			44168
599	7.27124	7.34137	599	0.999669	8	1	2	7.30012	216.1			53644
600	7.26679	7.34643	600	0.998047	7	1	2	7.30985	356.057			34842
601	7.29646	7.41098	601	0.996262	14	2;3	3	7.35496	1241.58			67554
602	7.30735	7.31884	602	1	3	1	2	7.31408	533.232			84963
603	7.28462	7.42242	603	0.99963	12	1	2	7.35568	212.915			108403
604	7.32417	7.34137	604	0.999976	3	1	2	7.33418	256.239			61824
605	7.32417	7.35089	605	0.999639	3	1	2	7.33694	216.952			25569
606	7.34137	7.51308	606	0.985745	29	2	3	7.42542	1069.5			134838
607	7.34137	7.37146	607	0.999886	3	1	2	7.35606	222.056			33510
608	7.31328	7.37146	608	0.999771	4	1	2	7.35035	326.193			24810
609	7.34643	7.38885	609	0.997691	4	1	2	7.36514	226.229			26795
610	7.3598	7.40568	610	0.999978	4	1	2	7.38304	256.959			55379
611	7.37738	7.48866	611	0.999993	11	1	2	7.43578	254.26			32501
612	7.37738	7.59059	612	0.999973	17	1	2	7.47909	295.136			142994
613	7.37146	7.63266	613	0.999677	29	1	2	7.50787	216.099			56715
614	7.41689	7.45999	614	0.987803	6	1	2	7.43869	444.111			50936
615	7.39419	7.43324	615	0.997687	3	1	2	7.41815	216.952			24584
616	7.42242	7.44661	616	0.997537	3	1	2	7.43276	866.421			55117
617	7.43324	7.46591	617	0.986807	4	1	2	7.4467	251.151			21991
618	7.44216	7.5963	618	0.997557	14	1	2	7.52782	256.96			104467
619	7.43324	7.49421	619	0.995595	6	1	2	7.45946	226.229			34556
620	7.45107	7.49939	620	0.999664	6	1	2	7.47436	212.915			104051
621	7.45107	7.99619	621	0.968596	58	1	2	7.70404	740.187			70819
622	7.46591	7.5963	622	0.999853	13	1	2	7.51948	216.952			42033
623	7.47183	7.49939	623	0.917963	5	1	2	7.48438	221.105			19057
624	7.46591	7.49939	624	0.998375	4	1	2	7.4821	222.056			22574
625	7.45107	7.48866	625	0.983476	4	1	2	7.47794	742.184			40345
626	7.46591	7.48273	626	0.998716	3	1	2	7.47515	356.058			29465
627	7.49421	7.5963	627	0.994636	11	1	2	7.54651	444.111			56146
628	7.49939	7.56804	628	0.993639	6	1	2	7.52373	251.151			21698
629	7.49421	7.5453	629	0.999974	4	1	2	7.52108	276.918			35695
630	7.48866	7.53462	630	0.99976	3	1	2	7.51145	284.27			39997
631	7.52397	7.61483	631	0.997853	7	1	2	7.57635	254.26			28197
632	7.55122	7.61929	632	0.999508	8	1	2	7.58331	212.915			97234
633	7.57397	7.67993	633	0.999675	9	1	2	7.62279	326.192			30310
634	7.58468	7.61037	634	0.999411	3	1	2	7.59863	276.918			36180
635	7.61037	7.65537	635	0.994241	6	1	2	7.63249	221.104			23086
636	7.61929	7.71124	636	1	7	1	2	7.65787	222.056			32300
637	7.62374	7.72016	637	0.99902	8	1	2	7.66412	251.151			24938
638	7.6282	7.65537	638	0.967893	4	1	2	7.64344	444.112			46738
639	7.61929	7.7429	639	0.999937	13	1	2	7.68485	295.136			124868
640	7.65003	7.84104	640	0.997025	20	1	2	7.73501	256.96			99377
641	7.66129	7.84104	641	0.998127	19	1	2	7.75108	216.099			54815
642	7.65537	7.84104	642	0.999987	23	1	2	7.74459	216.952			55873
643	7.65003	7.80367	643	0.999364	14	1	2	7.74247	212.915			108707
644	7.64448	7.69615	644	0.975171	3	2	2	7.66846	739.748			33606
645	7.66683	7.70679	645	0.999947	5	1	2	7.68916	254.26			23883
646	7.68547	7.80367	646	0.999584	8	1	2	7.74003	226.229			36083
647	7.67993	7.75438	647	0.999857	9	1	2	7.71491	281.213			42388
648	7.69083	7.76013	648	0.965397	8	1	2	7.72715	444.112			52740
649	7.70679	7.72016	649	0.999972	3	1	2	7.71547	213.082			34658
650	7.72016	7.7716	650	0.998132	3	1	2	7.75285	276.918			47862
651	7.72608	7.81552	651	0.922688	5	1	2	7.7762	221.105			21079
653	7.78139	7.81552	653	0.999998	4	1	2	7.79621	295.136			150818
655	7.78584	7.82144	655	0.993619	6	1	2	7.80295	254.26			24886
656	7.77693	8.02429	656	0.969244	39	2;3	3	7.90618	965.336			672049
657	7.76013	7.80813	657	0.999728	3	1	2	7.78815	222.056			31122
658	7.76013	7.7903	658	0.997386	3	1	2	7.77984	251.151			23151
659	7.7903	7.83358	659	0.999936	4	1	2	7.80886	281.214			26507
660	7.79476	7.85805	660	0.994367	6	2	2	7.82553	940.421			73193
661	7.82144	7.98137	661	0.987173	26	2	3	7.90478	949.372			249254
662	7.85805	7.97607	662	0.984438	9	2	3	7.89958	987.318			118870
663	7.87625	7.90178	663	0.982538	4	1	2	7.88686	218.166			137506
664	7.85805	7.95254	664	0.999871	6	2	3	7.90866	1003.28			117447
665	7.88687	7.92213	665	0.999541	3	1	2	7.90454	212.915			91105
666	7.9299	8.22883	666	0.999253	49	1	2	8.06799	569.242			3619062
667	7.93583	8.01139	667	0.999849	6	1	2	7.96399	253.902			63474
668	7.95254	8.18651	668	0.999957	37	1	2	8.06647	591.223			963905
669	7.92213	7.99619	669	0.996275	6	1	2	7.96578	256.959			93019
670	7.95994	8.05346	670	0.987702	6	4	3	8.0025	935.774			161577
671	7.97607	8.32768	671	0.999105	41	1	2	8.1688	329.994			157886
672	7.99026	8.1423	672	0.9946	29	2;1	3	8.06521	607.188			451247
673	7.99619	8.14762	673	0.999965	14	1	2	8.0674	348.152			303969
674	7.98137	8.15828	674	0.999738	23	1	2	8.07325	366.163			569270
675	8.02429	8.06412	675	0.999494	3	1	2	8.04617	235.931			117610
676	8.02429	8.09715	676	0.998457	4	1	2	8.05792	276.172			91001
677	8.07674	8.31701	677	0.999537	43	1	2	8.19443	298.118			311797
678	8.08791	8.32768	678	0.999415	39	1	2	8.20875	218.166			142059
679	8.09715	8.14762	679	0.987945	6	4	3	8.11773	935.774			141192
680	8.10307	8.2635	680	0.999978	19	1	2	8.19388	216.097			57040
681	8.12039	8.32768	681	0.999389	24	1	2	8.21259	233.944			143220
682	8.07674	8.32768	682	0.99739	23	1	2	8.21514	256.96			116416
683	8.07674	8.30637	683	0.955825	23	1	2	8.19879	740.187			67694
684	8.09715	8.32768	684	0.99779	71	1	2	8.22184	220.146			107475
685	8.13143	8.32768	685	0.999827	22	1	2	8.22529	276.172			81616
686	8.12572	8.32768	686	0.99939	16	1	2	8.23171	212.915			70182
687	8.13143	8.31701	687	0.999731	22	1	2	8.21912	216.952			53425
688	8.14762	8.18651	688	0.950359	5	1	2	8.16593	444.111			50502
689	8.1423	8.31701	689	0.999979	24	1	2	8.22847	253.902			51282
690	8.12039	8.17552	690	0.999808	4	1	2	8.15242	276.918			55198
691	8.13143	8.20896	691	0.937987	6	3	2	8.1709	761.777			24397
692	8.12572	8.27241	692	0.996916	11	1	2	8.20529	372.089			30424
693	8.12572	8.31701	693	0.999801	17	1	2	8.23531	281.213			33730
694	8.16421	8.29573	694	0.999994	11	1	2	8.22978	295.136			130967
695	8.16421	8.30637	695	0.999994	11	1	2	8.23613	326.193			31709
696	8.18059	8.30637	696	0.999999	15	1	2	8.25114	278.151			119683
697	8.19243	8.30637	697	0.999927	21	1	2	8.24939	238.141			182653
698	8.18651	8.20896	698	0.996549	3	2	2	8.19254	607.188			109961
699	8.16977	8.30637	699	0.999944	12	1	2	8.25144	254.26			29310
700	8.21454	8.29573	700	0.999129	12	1	2	8.25305	276.918			54381
701	8.21454	8.23329	701	0.998959	3	1	2	8.22327	300.114			25018
702	8.21992	8.31701	702	0.999568	8	1	2	8.2654	235.931			125713
703	8.22883	8.35204	703	0.987997	7	4	2	8.28854	935.774			132601
704	8.24666	8.30637	704	0.999096	9	1	2	8.27258	253.153			56859
705	8.22437	8.25258	705	0.999559	4	1	2	8.23643	213.082			25841
706	8.22437	8.23774	706	0.992149	4	1	2	8.23067	444.111			47479
707	8.21992	8.26795	707	0.989239	6	1	2	8.24811	207.936			21708
708	8.22437	8.28426	708	0.995438	5	1	2	8.25799	251.151			23775
709	8.26795	8.32768	709	0.986898	5	1	2	8.29255	444.111			56482
710	8.27833	8.57438	710	0.99779	42	2;1	3	8.41859	998.463			21317976
711	8.27833	8.31701	711	0.968695	4	1	2	8.29404	518.131			34650
712	8.29573	8.5853	712	0.999993	46	1;2	2	8.4173	795.384			9224562
713	8.29573	8.36566	713	0.978279	6	2	3	8.33753	1055.45			247256
714	8.31701	8.53743	714	0.994112	43	2;3	3	8.41829	1036.41			2582114
715	8.31701	8.52619	715	0.987522	25	2	3	8.41805	1020.44			1202665
716	8.3413	8.44286	716	0.99809	4	2	3	8.39369	1058.39			290551
717	8.45916	9.53504	717	0.999493	234	1	2	8.98393	234.161			572266
718	8.474	9.53504	718	0.999886	185	1	2	8.99132	227.224			195844
719	8.48543	9.2487	719	0.998123	137	1	2	8.86231	370.092			187301
720	8.49114	9.54244	720	0.997092	337	1	2	8.99506	282.167			196970
721	8.48543	8.57438	721	0.998446	14	2	3	8.52129	971.415			201139
722	8.474	8.67543	722	0.991263	13	4	2	8.57144	935.775			146612
723	8.47972	9.23382	723	0.999506	138	1	2	8.86528	298.118			328314
724	8.49114	8.77787	724	0.999182	26	1	2	8.63501	233.943			128189
725	8.50178	9.22839	725	0.999991	135	1	2	8.85712	220.146			107670
727	8.49114	9.22839	727	0.999827	106	1	2	8.86615	329.994			160776
728	8.49114	9.51749	728	0.999403	175	1	2	8.98961	326			486250
729	8.49114	9.51749	729	0.997946	174	1	2	8.9943	327.997			481205
730	8.50178	9.24121	730	0.999487	135	1	2	8.87211	218.166			142569
731	8.50178	8.56701	731	0.999657	5	1	2	8.53128	235.931			110840
732	8.48543	8.72009	732	0.999868	22	1	2	8.61401	276.172			89403
733	8.48543	9.2487	733	0.999891	139	1	2	8.87237	228.135			99832
734	8.50749	9.29213	734	0.999345	135	1	2	8.88783	390.276			182910
735	8.5153	8.69735	735	0.992011	18	1	2	8.61481	740.186			59328
736	8.52082	8.60209	736	0.999665	9	1	2	8.55692	281.214			36476
737	8.52082	9.22839	737	0.999926	116	1	2	8.90224	238.141			204537
738	8.52082	9.18884	738	0.999174	114	1	2	8.84647	354.061			167758
740	8.50749	9.22839	740	0.999989	94	1	2	8.88917	216.952			74023
741	8.50749	8.78679	741	0.999057	31	1	2	8.64769	253.902			51634
742	8.52619	8.60764	742	0.985924	9	2	2	8.5639	776.273			76001
743	8.53743	8.60764	743	0.999854	6	1	2	8.5707	212.915			56041
744	8.53743	8.59613	744	0.99845	4	1	2	8.56213	213.082			28491
745	8.5153	9.22839	745	0.997361	74	1	2	8.89782	256.959			136134
746	8.52619	8.72009	746	0.997592	17	1	2	8.64478	216.099			56314
747	8.55044	9.18884	747	0.999996	94	1	2	8.90506	278.151			123138
748	8.56701	8.60209	748	0.999766	4	1	2	8.58447	326.193			28006
749	8.57438	8.65286	749	0.963445	10	2	2	8.61635	937.341			68063
750	8.55044	8.73158	750	0.985217	11	6	3	8.64049	1277.49			43232
751	8.61296	8.64731	751	0.986435	4	2	3	8.63416	998.464			70912
752	8.63568	9.23382	752	0.998055	70	1	2	8.9242	276.918			72724
753	8.6183	8.64731	753	0.999635	3	1	2	8.6351	372.09			25592
754	8.63568	8.85208	754	0.999242	27	1	2	8.7474	281.213			38899
755	8.66434	8.74827	755	1	6	1	2	8.70085	326.192			29779
756	8.65286	8.73679	756	0.999222	5	1	2	8.69541	207.936			19382
757	8.65877	8.70265	757	0.960948	3	1	2	8.68032	254.26			23282
758	8.67543	8.75364	758	0.996639	6	1	2	8.714	295.136			134509
759	8.68642	8.72009	759	0.981753	3	1	2	8.69946	251.151			20266
760	8.66968	8.72601	760	0.991847	4	1	2	8.7007	221.104			18319
761	8.67543	8.97754	761	0.948444	23	1	2	8.83685	444.111			46766
762	8.72601	9.53504	762	0.991454	111	4	2	9.12966	935.775			124125
763	8.73158	8.80867	763	0.975535	12	1	2	8.76532	740.186			54086
764	8.73158	8.81459	764	0.997848	8	1	2	8.76827	372.089			40557
765	8.72009	8.78679	765	0.993804	6	1	2	8.76043	222.004			16950
766	8.75364	8.7645	766	0.999843	3	1	2	8.75948	212.915			47489
767	8.75364	8.85654	767	0.98364	26	2;3	3	8.81312	1370.54			95661
768	8.7427	8.78679	768	0.99919	4	1	2	8.76624	235.931			136200
769	8.75942	9.2487	769	0.998907	58	1	2	9.0064	276.172			89157
770	8.76896	9.07966	770	0.98809	28	6	3	8.91934	1277.49			47401
771	8.76896	8.78679	771	0.996707	3	1	2	8.77762	254.26			20244
772	8.78233	9.20562	772	0.999933	34	1	2	9.01315	326.193			37248
773	8.81459	8.83698	773	0.987821	3	1	2	8.8233	207.936			20163
774	8.82016	8.83165	774	0.999504	3	1	2	8.82617	233.944			110363
775	8.82016	8.83698	775	0.999741	3	1	2	8.8277	212.915			49752
776	8.82606	9.21627	776	0.999285	59	1	2	8.98486	253.902			42170
777	8.83698	8.91367	777	0.999919	6	1	2	8.87349	295.136			120919
778	8.84275	9.22839	778	0.980674	40	1	2	9.01516	740.186			67712
779	8.84275	8.91367	779	0.999916	6	1	2	8.87376	216.1			44564
780	8.84762	8.87437	780	0.999321	3	1	2	8.86241	235.931			122869
781	8.84762	8.87883	781	0.999865	3	1	2	8.86354	372.09			24612
782	8.86991	9.0009	782	0.999567	15	1	2	8.93222	207.936			23688
783	8.86099	8.90218	783	0.994193	3	1	2	8.87867	251.151			19484
784	8.87883	8.90218	784	0.999683	4	1	2	8.88928	281.214			30780
785	8.87437	8.92503	785	0.967572	4	1	2	8.8993	221.105			19981
786	8.89034	9.0065	786	0.999719	11	1	2	8.95336	233.944			119456
787	8.94343	9.10539	787	0.999964	19	1	2	9.02351	216.097			65833
788	8.94789	9.17364	788	0.999973	21	1	2	9.04155	295.136			134095
789	8.93897	8.97754	789	0.927626	4	3	3	8.96005	761.706			36076
790	8.93897	9.06782	790	0.999925	13	1	2	9.00285	281.214			30113
791	8.97017	9.0009	791	0.999681	3	1	2	8.98559	298.25			27956
792	8.99499	9.03961	792	0.999672	4	1	2	9.01393	235.931			123996
793	8.97754	9.03515	793	0.999455	6	1	2	9.01477	222.005			24850
794	8.97754	9.03961	794	0.99471	5	1	2	9.01533	221.105			18727
795	9.01226	9.14996	795	0.998123	13	1	2	9.07574	372.09			35112
796	9.01732	9.20562	796	0.982287	17	1	2	9.09692	444.112			45389
797	9.01732	9.07374	797	0.965874	5	3	2	9.04291	761.707			32214
798	9.03515	9.10985	798	0.998428	7	1	2	9.07204	298.25			35776
800	9.07374	9.09647	800	0.99642	3	1	2	9.08285	207.936			22057
801	9.10093	9.1143	801	0.999318	3	1	2	9.10833	254.26			22334
802	9.10539	9.19497	802	0.999311	12	1	2	9.15747	281.213			27775
803	9.10985	9.16181	803	0.983224	6	6	3	9.13611	1277.49			40805
804	9.11876	9.16773	804	0.968396	8	1	2	9.13811	221.104			19409
805	9.10539	9.20562	805	0.98202	9	3	2	9.15079	761.706			36822
806	9.14105	9.18884	806	0.999844	7	1	2	9.16341	216.099			43095
807	9.13213	9.17938	807	0.999597	4	1	2	9.15823	212.915			45518
809	9.17938	9.37922	809	0.980752	39	2;3	3	9.27273	1306.54			1249492
810	9.18438	9.21627	810	0.999605	3	1	2	9.19821	372.089			25990
811	9.20562	9.36796	811	0.99279	22	2	3	9.2798	979.352			336617
812	9.21627	9.29213	812	0.903351	6	2	3	9.25204	1344.48			112768
814	9.30338	9.50671	814	0.998006	33	1	2	9.4097	218.166			137710
815	9.32661	9.40354	815	0.997118	10	1	2	9.36843	256.959			116128
816	9.32661	9.51749	816	0.999658	32	1	2	9.41259	228.135			73305
817	9.30932	9.50671	817	1	34	1	2	9.40892	298.118			293590
818	9.30932	9.3458	818	0.999622	4	1	2	9.32575	276.172			97674
819	9.32069	9.50671	819	0.999973	33	1	2	9.40914	370.093			179823
820	9.32661	9.46342	820	0.999707	18	1	2	9.40265	238.141			199280
821	9.32661	9.52641	821	0.999857	30	1	2	9.40966	390.276			160643
822	9.33254	9.50671	822	0.997	18	1	2	9.42047	329.994			137309
823	9.33254	9.50671	823	0.999252	28	1	2	9.41396	220.146			88870
824	9.32069	9.50671	824	0.999996	26	1	2	9.407	216.952			65008
825	9.32069	9.49786	825	0.999984	30	1	2	9.40881	354.061			147027
826	9.33254	9.49237	826	0.999113	15	1	2	9.42391	216.099			73684
827	9.35171	9.41984	827	0.981993	6	6	3	9.38301	1277.49			41574
828	9.35726	9.45283	828	0.999126	12	1	2	9.40203	281.213			32053
829	9.35726	9.45283	829	0.999712	15	1	2	9.40338	278.151			123975
830	9.35726	9.46895	830	0.997019	14	1	2	9.40185	276.918			65659
831	9.3626	9.47428	831	0.990144	17	2	3	9.41234	975.356			75064
832	9.3733	9.46342	832	0.989358	12	1	2	9.41575	444.111			52631
833	9.37922	9.46342	833	0.996551	9	1	2	9.41715	326.193			28877
834	9.3626	9.39462	834	0.952347	3	3	2	9.37662	761.706			26461
835	9.3458	9.44837	835	0.998745	8	1	2	9.39472	207.936			23736
836	9.35726	9.50671	836	0.907033	14	1	2	9.42846	740.187			55961
837	9.33254	9.45729	837	0.999997	17	1	2	9.39933	253.902			42564
838	9.38481	9.50671	838	0.997305	14	1	2	9.44535	276.172			83225
839	9.36796	9.39908	839	0.93891	3	1	2	9.38736	221.105			18561
840	9.40354	9.44837	840	0.999731	4	1	2	9.42814	295.136			131515
843	9.44304	9.50671	843	0.987503	11	2	3	9.48014	1036.37			343337
844	9.44304	9.48173	844	0.975721	5	3	2	9.46374	761.706			29996
845	9.44304	9.49237	845	0.997412	6	1	2	9.46574	256.96			117171
846	9.44304	9.51749	846	0.971334	7	2	3	9.49289	1020.41			115459
850	9.49237	9.55134	850	0.970728	8	2	3	9.52915	1069.5			466554
851	9.47428	9.52641	851	0.999494	3	1	2	9.50802	235.93			127146
852	9.52641	9.69799	852	0.966738	39	2;3;4	3	9.60637	1192.51			3464385
853	9.53504	9.66425	853	0.951335	8	2	3	9.59396	1176.54			966233
854	9.56023	9.68933	854	0.997593	15	1	2	9.61518	720.265			2149621
855	9.56023	9.60385	855	0.998819	4	2	3	9.58662	933.475			976358
857	9.62941	9.68933	857	0.993127	7	2	3	9.65507	736.23			809206
858	9.67318	9.87854	858	0.999023	34	2	3	9.75821	1113.49			798203
859	9.68187	9.98354	859	0.999882	52	1	2	9.83199	227.224			164508
860	9.68933	9.85478	860	0.999994	26	1;2	2	9.76908	910.411			264461
861	9.68187	9.98354	861	0.998713	100	1	2	9.84112	282.167			222503
862	9.68187	9.98354	862	0.997782	60	1	2	9.83398	234.161			517290
863	9.68933	9.97455	863	0.999234	50	1	2	9.83467	327.996			485455
864	9.69799	9.97455	864	0.983316	49	1	2	9.83734	390.276			150288
865	9.70681	9.97455	865	0.996394	37	1	2	9.85104	329.994			147588
866	9.68933	9.97455	866	0.994172	47	1	2	9.84199	370.093			166516
867	9.68933	9.98354	867	0.985083	42	4	2	9.83326	935.774			106220
868	9.69799	9.97455	868	0.999968	38	1	2	9.84059	216.951			93959
869	9.69799	9.99809	869	0.999999	52	1	2	9.84786	325.999			518533
870	9.68933	9.98354	870	0.999716	49	1	2	9.83573	228.208			78192
871	9.714	9.97455	871	0.999935	47	1	2	9.84553	298.118			258516
872	9.714	9.98354	872	0.999531	48	1	2	9.84809	218.166			141375
873	9.714	9.95355	873	0.996981	27	1	2	9.83532	256.959			116797
874	9.714	9.81923	874	0.981443	22	2;3	3	9.76156	1151.44			103352
875	9.714	9.9656	875	0.999998	41	1	2	9.85091	220.146			90409
876	9.72142	9.81365	876	0.99934	10	1	2	9.76091	276.172			81632
877	9.714	9.958	877	0.996126	42	1	2	9.83772	354.061			120585
878	9.714	9.73288	878	0.999227	4	1	2	9.72277	235.93			140994
879	9.72142	9.74413	879	0.957152	4	1	2	9.73419	740.186			52270
880	9.714	9.958	880	0.999339	25	1	2	9.86187	281.213			33704
881	9.714	9.76855	881	0.999884	4	1	2	9.7406	233.944			93270
882	9.72733	9.77411	882	0.999057	5	1	2	9.75706	238.141			156439
883	9.73288	9.80775	883	0.950236	6	2	3	9.7729	1135.47			58037
884	9.75712	9.97455	884	0.99873	22	1	2	9.86332	253.941			38592
885	9.77411	9.90993	885	0.998297	32	3;2	4	9.83781	1434.63			147145
886	9.78559	9.85924	886	0.978298	10	2;3	3	9.81313	1241.58			56328
887	9.76284	9.958	887	0.996816	26	1	2	9.86959	276.918			63053
888	9.78005	9.81365	888	0.990436	5	2	3	9.7957	1170.51			64176
889	9.79151	9.97455	889	0.957136	22	1	2	9.88216	740.185			61574
890	9.78559	9.84943	890	0.998229	4	2	3	9.81715	1038.51			52592
891	9.78559	9.85924	891	0.982807	5	6	3	9.81653	1277.49			41648
892	9.77411	9.94909	892	0.999537	14	1	2	9.87661	326.193			24062
893	9.79707	9.958	893	0.99785	22	1	2	9.89107	278.151			109174
894	9.79707	9.958	894	0.995964	16	1	2	9.87648	216.098			66805
895	9.81923	9.86815	895	0.988108	7	2	3	9.84078	1363.56			53748
896	9.82457	9.94909	896	0.997482	9	1	2	9.87601	207.936			22678
897	9.83049	9.8637	897	0.991721	4	1	2	9.85245	221.104			22657
898	9.83049	9.9656	898	0.99945	26	1	2	9.90119	238.141			189787
899	9.84943	9.9656	899	0.997502	13	1	2	9.90972	276.172			80361
900	9.85478	9.94909	900	0.999891	21	3;2	3	9.89799	1184.53			81481
901	9.83607	9.88416	901	0.998429	4	1	2	9.86193	255.255			28275
902	9.8637	9.94463	902	0.981814	7	1	2	9.90444	444.111			44392
903	9.86815	9.91585	903	0.963866	5	3	2	9.88952	761.706			27866
904	9.88416	9.93484	904	0.99665	5	2	3	9.90604	981.447			47502
905	9.89839	9.95355	905	0.999987	7	1	2	9.92733	295.136			118893
906	9.88948	9.94909	906	0.999999	5	1	2	9.91954	372.09			19072
907	9.9043	9.94463	907	0.938317	4	2	3	9.92255	1154.53			44866
908	9.90993	9.94909	908	0.971096	4	1	2	9.93138	221.104			15790
909	9.92924	9.94909	909	0.987675	4	6	3	9.94033	1277.49			32304
912	9.94909	10.4199	912	0.993194	87	2;3;1	3	10.082	979.352			16807006
913	9.958	10.2519	913	0.974149	52	2;1	2	10.078	963.387			11662712
914	9.9656	9.99809	914	0.95486	4	2	3	9.988	1001.33			256073
915	9.98354	10.0068	915	0.960928	3	2	2	10.0013	994.315			326021
916	9.99809	10.0242	916	0.915222	4	2	3	10.0171	1920.76			1540388
917	9.98354	10.0242	917	0.97156	3	2	2	10.0125	985.32			526607
918	9.97455	9.99809	918	0.989559	3	2	3	9.99113	1017.3			384131
920	10.1697	10.7001	920	0.999502	92	1	2	10.4442	326			499395
921	10.187	10.3187	921	0.998396	20	2	3	10.2363	1113.49			619751
922	10.193	10.7001	922	0.999969	85	1	2	10.4447	218.166			153629
923	10.2004	10.3098	923	0.997604	12	2	3	10.2442	927.425			173186
924	10.2004	10.2817	924	0.99117	12	1	2	10.2397	910.412			169626
925	10.193	10.7268	925	0.988702	70	4	2	10.4355	935.773			95046
926	10.193	14.4335	926	0.999114	792	1	2	12.2974	234.161			495342
927	10.193	10.718	927	0.999156	92	1	2	10.457	227.224			187139
928	10.1784	10.6912	928	0.998845	82	1	2	10.4567	370.093			154399
929	10.1784	10.2185	929	0.993379	3	3;2	3	10.195	1017.3			303315
930	10.1784	10.718	930	0.999996	183	1	2	10.4579	282.167			185153
931	10.2004	10.6912	931	0.997979	86	1	2	10.4579	327.996			447296
932	10.2078	10.3276	932	0.967686	20	3;2	4	10.2666	1597.76			302620
933	10.2078	10.2817	933	0.999724	16	1	2	10.2526	228.208			66420
934	10.2359	10.7001	934	0.999989	87	1	2	10.4685	298.118			281277
935	10.2287	10.3142	935	0.996902	16	2;3	3	10.2688	1394.68			171246
936	10.2359	10.6858	936	0.99642	57	1	2	10.4686	329.994			153058
937	10.2359	10.6858	937	0.999975	83	1	2	10.4595	390.276			147533
938	10.2445	10.7001	938	0.999765	74	1	2	10.4692	216.952			76513
939	10.2445	10.6858	939	0.998747	59	1	2	10.4756	276.918			74568
940	10.2519	10.3467	940	0.999983	12	1	2	10.2983	276.171			79439
941	10.2593	10.678	941	0.999578	75	1	2	10.4673	220.146			79287
942	10.2593	10.2702	942	0.924009	3	1	2	10.2649	740.185			46870
943	10.2593	10.6912	943	0.999484	56	1	2	10.4793	216.097			66581
944	10.2702	10.449	944	0.999041	20	1	2	10.3647	281.213			30622
945	10.2891	10.678	945	0.998706	55	1	2	10.4733	354.061			106202
946	10.2761	10.4664	946	0.997057	19	1	2	10.3775	256.959			116117
947	10.2702	10.3053	947	0.985764	7	2	3	10.2893	1194.61			73356
948	10.2593	10.3563	948	0.999401	7	1	2	10.3106	235.931			122258
949	10.2891	10.3187	949	0.957494	4	3	2	10.3044	761.705			28358
950	10.2761	10.4244	950	0.999785	22	1	2	10.3581	238.141			186492
951	10.3	10.3276	951	0.902232	6	6	3	10.3141	1277.49			35377
952	10.3053	10.3232	952	0.998829	4	1	2	10.3146	207.936			17330
953	10.3098	10.7268	953	0.997244	70	1	2	10.5018	228.135			87279
954	10.3098	10.678	954	0.998984	39	1	2	10.4942	253.941			38440
955	10.3098	10.4436	955	0.999809	13	1	2	10.3643	278.151			116376
956	10.3187	10.3835	956	0.999978	8	1	2	10.349	326.193			30462
957	10.3053	10.3409	957	0.999914	4	1	2	10.3261	295.136			110932
958	10.3142	10.6858	958	0.904201	37	1	2	10.508	740.186			68726
959	10.3335	10.3563	959	0.96954	3	1	2	10.3432	444.112			42113
960	10.3409	10.4718	960	0.962199	24	2	3	10.3943	1242.53			210153
961	10.3518	10.4664	961	0.996685	19	2	3	10.4032	1238.58			199457
962	10.3563	10.4807	962	0.965661	38	3;2	3	10.4114	1441.66			149143
963	10.4155	10.4436	963	0.944283	3	6	3	10.4317	1277.49			28529
964	10.4381	10.5587	964	0.958348	8	3	2	10.4909	761.707			27598
965	10.449	10.5306	965	0.999979	10	1	2	10.4944	295.136			117429
966	10.4664	10.5418	966	0.985327	13	2	3	10.4945	1184.53			90066
967	10.4718	10.5074	967	0.999878	4	1	2	10.4901	213.082			32803
968	10.4608	10.6073	968	0.998006	12	1	2	10.5327	326.193			28081
969	10.4608	10.4985	969	0.999529	5	1	2	10.4796	207.936			23859
970	10.4549	10.4762	970	0.942635	3	1	2	10.4654	283.286			17434
971	10.4244	10.4664	971	0.920171	3	1	2	10.4474	221.105			18095
972	10.4321	10.6407	972	0.997572	20	1	2	10.5306	276.172			72887
973	10.4664	10.6858	973	0.999921	31	1	2	10.5666	238.141			185913
974	10.4807	10.678	974	0.999864	28	1	2	10.5714	278.151			115151
975	10.4807	10.5676	975	0.99978	9	1	2	10.526	281.213			25764
976	10.4807	10.5306	976	0.967934	4	1	2	10.5023	207.125			17863
977	10.4941	10.678	977	0.996253	23	1	2	10.5869	256.959			137272
978	10.4941	10.5478	978	0.928368	6	3	4	10.5204	1427.65			42813
979	10.5191	10.5632	979	0.992424	4	2	3	10.5338	1224.57			48980
980	10.4985	10.5478	980	0.998391	4	1	2	10.5263	221.104			19085
981	10.5478	10.5676	981	0.976763	3	1	2	10.5576	444.112			35112
982	10.5632	10.6659	982	0.999999	10	1	2	10.608	295.136			124727
983	10.525	10.5855	983	1	5	1	2	10.5596	249.992			29200
984	10.5534	10.5765	984	0.9995	4	1	2	10.5688	207.936			27513
985	10.5478	10.5721	985	1	3	1	2	10.5624	222.005			31675
986	10.5765	10.5958	986	0.999989	3	1	2	10.5848	213.082			33035
987	10.5587	10.5958	987	0.987802	3	1	2	10.5799	226.229			18756
988	10.5632	10.5899	988	0.999968	3	1	2	10.5796	206.977			41763
989	10.5958	10.6407	989	0.999756	6	1	2	10.6175	298.25			40185
990	10.5958	10.6073	990	0.931105	3	3	2	10.6012	761.707			23224
991	10.5958	10.6703	991	0.999679	8	1	2	10.6331	281.214			26108
992	10.5855	10.6703	992	0.980682	5	1	2	10.6261	221.105			22645
993	10.6241	10.657	993	0.996095	3	1	2	10.6443	207.936			15152
994	10.6463	10.9237	994	0.998677	42	2;3	3	10.7505	1184.53			11120683
995	10.6614	10.678	995	0.99933	4	1	2	10.6684	217.976			60216
996	10.6659	10.8379	996	0.998168	43	1;2	2	10.7465	981.448			1330443
997	10.678	10.8379	997	0.962925	35	2;3	3	10.7489	1222.47			966921
998	10.678	10.8218	998	0.976957	16	2	3	10.75	1206.51			561855
999	10.7001	10.7693	999	0.98604	4	2	3	10.7388	1244.45			216654
1000	10.6912	10.8035	1000	0.944284	5	2	3	10.7481	1260.42			194534
1001	10.7693	14.2115	1001	0.997899	1143	1	2	12.4822	282.167			209146
1002	10.7871	10.9132	1002	0.920436	19	4	2	10.847	935.775			70842
1003	10.7871	11.2815	1003	0.999905	78	1	2	11.0171	327.997			495305
1004	10.7871	11.2225	1004	0.996587	76	1	2	11.0082	326			478263
1005	10.8035	11.1925	1005	0.999534	73	1	2	10.9983	298.118			273311
1006	10.7693	12.467	1006	0.999962	294	1	2	11.6418	227.224			167128
1007	10.7946	11.0926	1007	0.999912	45	1	2	10.9401	218.166			127363
1008	10.8089	11.2136	1008	0.999121	72	1	2	11.0022	390.276			145992
1009	10.8163	11.2136	1009	0.996289	52	1	2	10.9976	329.994			146501
1010	10.8218	11.1925	1010	0.998127	50	1	2	10.979	354.061			101786
1011	10.8218	11.2136	1011	0.997857	62	1	2	10.9933	276.918			76668
1012	10.7946	11.0868	1012	0.997032	29	1	2	10.9602	276.172			78181
1013	10.8035	11.2	1013	0.999917	62	1	2	11.0023	216.952			79830
1014	10.8089	10.8661	1014	1	8	1	2	10.8325	228.135			70910
1016	10.8163	11.2136	1016	0.99905	70	1	2	11.0076	370.092			127068
1017	10.8218	10.8379	1017	0.939574	3	1	2	10.83	444.111			42513
1018	10.8325	10.8829	1018	0.997928	8	1	2	10.8561	740.186			57619
1019	10.8272	11.2	1019	0.999534	67	1	2	11.0031	220.146			83034
1020	10.8272	10.8545	1020	0.996403	3	1	2	10.8438	207.936			20882
1021	10.8436	10.8661	1021	0.998087	3	1	2	10.8536	310.162			38220
1022	10.8436	10.9955	1022	0.999832	12	1	2	10.9208	298.25			30053
1023	10.8379	11.1234	1023	0.999739	30	1	2	10.9774	281.213			34963
1024	10.8272	11.1521	1024	0.996115	39	1	2	10.9972	253.941			35782
1025	10.8325	11.2729	1025	0.999278	67	1	2	11.0607	238.141			209381
1026	10.8436	12.467	1026	0.999959	239	1	2	11.3491	216.097			1718921
1027	10.8218	11.1565	1027	0.999658	27	1	2	10.9918	326.193			29344
1028	10.8325	11.2433	1028	0.999882	63	1	2	11.0471	278.151			138756
1029	10.8545	10.8963	1029	0.981351	6	1	2	10.8795	226.975			20753
1030	10.8436	10.9176	1030	0.997148	8	2	2	10.8853	456.271			64592
1031	10.8436	10.8829	1031	0.901816	4	6	3	10.8634	1277.49			31914
1032	10.8661	10.8918	1032	0.999312	3	1	2	10.878	235.93			113051
1033	10.872	10.8829	1033	0.999977	3	1	2	10.8763	249.992			25558
1034	10.872	11.1189	1034	0.999682	20	1	2	10.981	222.005			39834
1035	10.8661	11.0926	1035	0.998772	20	1	2	10.9666	256.96			161724
1036	10.8918	11.1189	1036	0.999919	19	1	2	10.9983	295.136			127155
1037	10.8963	11.1423	1037	0.999327	14	1	2	11.0105	255.255			36568
1038	10.9022	10.9176	1038	0.948888	3	1	2	10.9113	221.105			18895
1039	10.9022	10.9434	1039	0.998125	4	1	2	10.9179	207.936			21654
1040	10.9132	11.161	1040	0.964084	26	1	2	11.0328	740.185			52369
1041	10.9022	10.9434	1041	0.931136	3	3	2	10.9239	761.707			21976
1042	10.9022	11.2	1042	0.999549	45	1	2	11.065	228.135			78857
1043	10.8874	10.9237	1043	0.961975	3	1	2	10.909	444.112			38215
1044	10.8874	10.9295	1044	0.999726	4	1	2	10.9086	213.082			34141
1045	10.9295	10.984	1045	0.999206	5	1	2	10.9526	226.975			23219
1046	10.9132	10.9706	1046	0.929122	5	1	2	10.9401	260.123			31186
1047	10.9478	11.1655	1047	0.963928	26	4	3	11.0654	935.774			62528
1048	10.9597	10.9795	1048	0.999812	3	1	2	10.97	372.09			15737
1049	10.9653	11.0926	1049	0.996422	13	1	2	11.0215	221.105			19131
1050	10.9706	11.0664	1050	0.998758	9	1	2	11.02	249.992			33099
1051	10.9538	10.9795	1051	0.99956	3	1	2	10.9702	207.125			20233
1052	10.9478	11.0053	1052	0.999862	4	1	2	10.9826	217.976			63197
1053	10.9434	11.0009	1053	0.999664	4	1	2	10.9658	206.977			49344
1054	10.9706	11.0338	1054	0.966984	5	1	2	11.0043	283.287			20124
1055	10.9751	11.0285	1055	0.998565	5	1	2	11.0061	207.936			17379
1056	11.0098	11.0398	1056	0.997524	4	1	2	11.0237	207.125			19229
1057	11.0457	11.1367	1057	0.940894	23	3;2	3	11.0909	1441.66			66803
1058	11.0398	11.0976	1058	0.976987	4	3	2	11.0639	761.707			26280
1059	11.0512	11.1145	1059	0.999136	11	2	3	11.0873	1238.58			120484
1060	11.0566	11.0708	1060	0.99955	3	1	2	11.0652	227.028			19890
1061	11.0926	11.1728	1061	0.971742	12	2	3	11.1287	1099.47			73343
1062	11.0976	11.1521	1062	0.989923	7	1	2	11.1201	283.287			24182
1063	11.0708	11.1521	1063	0.999047	5	1	2	11.1154	235.931			115422
1064	11.0708	11.1036	1064	0.999734	3	1	2	11.0905	298.25			28267
1065	11.1234	11.9392	1065	0.999613	102	1	2	11.5495	218.166			162252
1066	11.1293	11.161	1066	0.999975	4	1	2	11.1449	256.959			123913
1067	11.1036	11.2433	1067	0.999734	15	1	2	11.1971	239.172			322467
1068	11.1293	11.1565	1068	0.986857	3	1	2	11.146	260.123			29347
1069	11.1367	11.1655	1069	0.999373	4	1	2	11.1509	276.172			75413
1070	11.1565	11.3319	1070	0.994505	36	2;3	3	11.2443	1377.57			2089509
1071	11.1565	11.3373	1071	0.993352	32	2;3	3	11.2421	1313.57			2190435
1072	11.1925	11.2596	1072	0.997265	7	2	3	11.2319	1110.49			273119
1073	11.1925	11.2729	1073	0.974631	9	3;2	3	11.2404	1351.52			165942
1074	11.2136	11.2433	1074	0.926659	5	2;3	3	11.2303	1415.52			231830
1075	11.2311	11.4476	1075	0.99968	30	2	3	11.311	1184.53			3715498
1076	11.2433	11.5618	1076	0.98486	32	4	2	11.4019	935.775			78157
1077	11.2675	11.3868	1077	0.979957	29	2;3	3	11.3134	1222.47			406158
1078	11.2729	11.3373	1078	0.97444	7	2	3	11.305	1206.51			193676
1079	11.2729	11.3957	1079	0.999472	23	2;1	2	11.3131	981.448			721871
1081	11.3208	12.4324	1081	0.998554	206	1	2	11.8913	390.276			170513
1082	11.3262	12.4759	1082	0.998929	208	1	2	11.8963	327.997			465089
1083	11.3262	12.4534	1083	0.999178	166	1	2	11.8896	228.136			78183
1084	11.3466	12.4759	1084	0.997579	207	1	2	11.8983	326			488818
1085	11.3466	12.4534	1085	0.999946	189	1	2	11.898	220.146			88498
1086	11.3541	11.4423	1086	0.999291	7	1	2	11.3914	276.172			66236
1087	11.3466	12.3419	1087	0.978347	110	1	2	11.8269	740.186			71490
1088	11.3466	12.4534	1088	0.999857	206	1	2	11.8969	298.118			262073
1090	11.3706	11.6458	1090	0.999053	32	1	2	11.5163	329.994			130362
1091	11.3706	12.4033	1091	0.999719	174	1	2	11.8993	278.151			119875
1092	11.3761	12.4273	1092	0.999561	180	1	2	11.8845	370.093			103682
1093	11.3815	11.4199	1093	0.968509	5	2	3	11.3969	1050.39			90031
1094	11.3647	12.467	1094	0.999074	184	1	2	11.9146	216.952			87517
1095	11.3706	12.4216	1095	0.99983	175	1	2	11.9096	238.141			205779
1097	11.3706	11.9889	1097	0.999455	71	1	2	11.6687	354.061			95144
1098	11.3761	12.4324	1098	0.998991	165	1	2	11.9117	276.918			71647
1099	11.3466	11.3957	1099	0.999207	3	1	2	11.3744	235.931			108760
1100	11.3913	11.5618	1100	0.999926	21	1	2	11.4737	253.941			31632
1101	11.4016	11.4257	1101	0.999294	3	1	2	11.4153	256.959			118631
1102	11.3957	11.5565	1102	0.999928	20	1	2	11.4819	281.214			31395
1103	11.3913	11.4091	1103	0.999162	3	1	2	11.3979	254.224			19733
1104	11.4016	11.5098	1104	0.998787	10	1	2	11.4507	226.975			21352
1105	11.4091	11.4367	1105	0.99971	3	2	3	11.4239	1347.56			24655
1106	11.4016	11.4625	1106	0.925328	5	2	4	11.4373	2136.74			26915
1107	11.4367	11.6068	1107	1	15	1	2	11.5102	222.005			37261
1108	11.4521	11.4926	1108	0.998981	5	1	2	11.4706	298.25			31064
1109	11.4423	11.4777	1109	0.970928	5	2	3	11.457	2119.71			26043
1110	11.4476	11.5449	1110	0.997452	20	2	3	11.4958	1134.45			180580
1111	11.4521	11.5565	1111	0.999098	11	1	2	11.4976	295.136			113266
1112	11.4566	11.5098	1112	0.999998	7	1	2	11.4771	326.193			26706
1113	11.4566	11.5565	1113	0.997072	10	1	2	11.5058	283.287			18530
1114	11.4423	11.5927	1114	0.996748	11	1	2	11.5294	221.104			20611
1115	11.4733	11.587	1115	0.999794	15	1	2	11.5303	256.959			121298
1116	11.4733	11.5098	1116	0.998966	5	1	2	11.4917	249.992			33145
1117	11.4733	11.5618	1117	0.997357	9	1	2	11.5127	276.172			67248
1118	11.4521	11.5262	1118	0.999544	7	1	2	11.4921	207.936			22366
1119	11.504	11.5262	1119	0.999138	3	1	2	11.5122	235.931			123939
1120	11.5098	11.6236	1120	0.950839	18	3	4	11.5682	1813.74			101303
1121	11.5147	11.6068	1121	0.95839	6	1	2	11.5567	260.123			34472
1122	11.5509	11.6555	1122	0.956344	16	3	3	11.598	1597.76			86413
1123	11.5618	11.6068	1123	0.998215	5	1	2	11.5842	255.255			32597
1124	11.5751	11.7676	1124	0.995733	35	2	3	11.6617	1313.57			273902
1125	11.5662	11.6458	1125	0.952565	7	2	3	11.6036	1394.69			74315
1126	11.5927	11.6183	1126	0.907111	3	4	3	11.6055	935.774			47625
1127	11.5927	12.4089	1127	0.950081	74	1	2	11.9789	253.941			34363
1128	11.587	11.6183	1128	0.997726	3	1	2	11.5999	226.975			18416
1129	11.587	11.7406	1129	0.996256	10	1	2	11.6765	276.172			74136
1130	11.5927	11.799	1130	0.999537	22	1	2	11.7104	281.214			30000
1131	11.6236	11.7406	1131	0.997687	9	1	2	11.6784	326.193			30132
1132	11.6458	11.7539	1132	0.999964	8	1	2	11.6991	222.005			36675
1133	11.6458	11.6837	1133	0.942074	4	1	2	11.6609	255.255			32900
1134	11.6236	11.8203	1134	0.999049	18	1	2	11.7444	256.96			117454
1135	11.6555	11.6781	1135	0.999952	4	1	2	11.6652	249.992			26607
1136	11.6645	11.7208	1136	0.950745	5	1	2	11.6903	221.105			17511
1137	11.6781	12.4413	1137	0.99857	108	1	2	12.048	329.994			147606
1138	11.6891	11.7263	1138	0.908267	4	4	2	11.7107	935.775			40661
1139	11.7039	11.7361	1139	0.964919	5	2	3	11.7192	1152.55			50848
1140	11.6891	11.8247	1140	0.998932	15	1	2	11.7745	283.287			23010
1141	11.6781	11.6935	1141	0.986831	3	1	2	11.6869	226.975			15344
1142	11.7361	11.8158	1142	0.999545	13	2	3	11.782	1136.55			78532
1143	11.7676	11.7785	1143	0.932107	3	4	3	11.7729	935.775			39846
1144	11.783	11.8672	1144	0.999921	8	1	2	11.8215	295.136			113286
1145	11.7732	12.0499	1145	0.999685	25	1	2	11.8954	326.193			32338
1146	11.7732	12.0499	1146	0.992474	22	1	2	11.9112	276.172			68696
1147	11.7732	11.9097	1147	0.926783	11	1	2	11.8481	255.255			33323
1148	11.8158	11.884	1148	0.938694	8	4	3	11.856	935.775			48421
1149	11.8158	11.8381	1149	0.999029	3	1	2	11.8288	298.25			32389
1150	11.8203	11.8503	1150	0.999316	3	1	2	11.8316	235.931			105242
1151	11.8247	11.9288	1151	0.995805	8	1	2	11.8747	226.975			23580
1152	11.8381	12.4033	1152	0.998207	62	1	2	12.1497	281.213			31182
1153	11.8562	11.8955	1153	0.962835	5	1	2	11.8753	260.123			37407
1154	11.8562	12.0812	1154	0.997995	17	1	2	11.9632	283.287			24381
1155	11.8672	11.8955	1155	0.994718	3	1	2	11.883	219.174			15921
1156	11.8899	11.9676	1156	0.963993	14	2	3	11.9278	1441.63			54921
1157	11.9008	11.9231	1157	0.999842	3	1	2	11.9145	295.136			120250
1158	11.8784	11.9735	1158	0.998749	9	1	2	11.9244	280.105			56642
1159	11.8562	11.9097	1159	0.998689	4	1	2	11.8884	310.162			45141
1160	11.8672	11.9008	1160	0.999568	3	1	2	11.8802	256.96			111599
1161	11.8784	11.9187	1161	0.999831	3	1	2	11.8984	249.992			29710
1162	11.9288	12.0022	1162	0.968398	13	3	4	11.9687	1384.61			65334
1163	11.9392	11.9676	1163	0.999048	3	1	2	11.9474	310.162			45142
1164	11.9231	11.9791	1164	0.999237	4	1	2	11.9529	219.174			25997
1165	11.9288	11.9676	1165	0.999988	4	1	2	11.9481	298.25			29979
1166	11.9333	12.0767	1166	0.997601	14	1	2	12.0185	256.96			116338
1167	11.962	12.0669	1167	0.999999	12	1	2	12.0171	295.136			129176
1168	11.9844	12.0499	1168	0.944152	6	1	2	12.0183	255.255			30968
1169	11.9735	11.9933	1169	0.995949	3	1	2	11.9852	226.975			18556
1170	11.9889	12.0332	1170	0.992037	6	1	2	12.0094	218.167			113708
1171	11.9889	12.0022	1171	0.99993	5	1	2	11.9962	222.005			35978
1172	11.9889	12.0022	1172	0.999409	3	1	2	11.9949	249.992			33687
1173	11.9978	12.0332	1173	0.998724	5	1	2	12.0147	298.25			40303
1174	12.0169	12.4089	1174	0.996789	46	1	2	12.2093	354.061			75287
1176	12.0213	12.0554	1176	0.999811	5	1	2	12.0362	226.975			23317
1177	12.0332	12.0767	1177	0.998098	5	1	2	12.0585	222.005			36534
1178	12.0332	12.132	1178	0.978427	9	1	2	12.0845	221.104			21186
1179	12.0388	12.0614	1179	0.993146	3	2	3	12.0499	1400.6			24956
1180	12.0499	12.0959	1180	0.97773	5	1	2	12.069	260.123			39350
1181	12.0022	12.0901	1181	0.979063	6	1	2	12.0531	444.111			40765
1182	12.0723	12.1048	1182	0.998645	4	1	2	12.0905	207.936			23086
1183	12.0767	12.2724	1183	0.999869	29	1	2	12.1697	218.166			135824
1184	12.0767	12.0959	1184	0.968761	3	1	2	12.0843	398.338			37309
1185	12.0812	12.2572	1185	0.999239	17	1	2	12.1608	326.193			25892
1186	12.0857	12.2148	1186	0.99924	15	1	2	12.1382	226.975			24147
1187	12.1003	12.1211	1187	0.99897	3	1	2	12.1117	276.172			71299
1188	12.0857	12.1435	1188	0.999992	4	1	2	12.1135	217.976			69405
1189	12.0857	12.1379	1189	0.998956	5	1	2	12.1076	298.25			34297
1190	12.1048	12.155	1190	0.996566	5	1	2	12.1265	256.959			111161
1191	12.1092	12.184	1191	0.999429	9	1	2	12.1461	222.004			43036
1192	12.1092	12.2976	1192	0.999086	16	1	2	12.204	255.255			33881
1193	12.132	12.1693	1193	0.991013	4	1	2	12.1459	249.992			24663
1194	12.1267	12.1737	1194	0.980318	5	2	3	12.1581	1978.69			43825
1195	12.1152	12.155	1195	0.914536	3	3	2	12.1298	761.706			20996
1196	12.1092	12.2368	1196	0.996812	10	1	2	12.1683	283.287			18559
1197	12.0959	12.2572	1197	0.999987	14	1	2	12.1865	295.136			118102
1198	12.1494	12.2679	1198	0.991706	22	2	3	12.2148	1313.57			127263
1199	12.1435	12.2199	1199	0.995994	6	1	2	12.1875	207.936			17911
1200	12.1693	12.2976	1200	0.999837	11	1	2	12.2346	298.25			32129
1201	12.2148	12.2421	1201	0.913825	5	2	3	12.2275	1978.68			34326
1202	12.2148	12.32	1202	0.980767	9	1	2	12.2672	221.104			18916
1203	12.2199	12.2917	1203	0.999875	6	1	2	12.2526	256.96			124120
1204	12.2199	12.3254	1204	0.99958	13	1	2	12.2817	222.005			41046
1205	12.2259	12.2679	1205	0.901774	6	4	2	12.2461	935.787			39923
1206	12.2368	12.3254	1206	0.998966	8	1	2	12.2784	249.992			31086
1207	12.2148	12.4534	1207	0.999208	15	1	2	12.3301	276.172			70045
1208	12.1884	12.2199	1208	0.957601	3	1	2	12.2075	444.111			34299
1209	12.251	12.32	1209	0.999463	6	1	2	12.2744	227.028			22821
1210	12.2769	12.2976	1210	0.999286	3	1	2	12.2857	207.936			18183
1211	12.2813	12.3583	1211	0.999911	5	1	2	12.3113	219.174			27306
1212	12.2769	12.2858	1212	0.999966	3	1	2	12.2819	210.198			26856
1213	12.2629	12.2917	1213	0.999976	3	1	2	12.2798	310.162			35230
1214	12.3032	12.3307	1214	0.978707	4	1	2	12.3155	444.112			37459
1215	12.3085	12.3829	1215	0.993193	7	1	2	12.3433	283.287			22786
1216	12.3145	12.3361	1216	0.971292	3	3	4	12.3252	1627.73			21035
1217	12.3085	12.377	1217	0.998071	9	1	2	12.3474	218.166			119270
1218	12.2917	12.3361	1218	0.996479	4	1	2	12.3151	295.136			94906
1219	12.3085	12.4273	1219	0.999316	12	1	2	12.366	326.193			39892
1220	12.3254	12.3361	1220	0.999101	3	1	2	12.3301	310.162			35655
1221	12.3361	12.4033	1221	0.940329	8	1	2	12.3618	255.255			35895
1222	12.3254	12.377	1222	0.996273	4	1	2	12.3502	256.959			109127
1223	12.3307	12.3636	1223	0.943732	3	4	3	12.3466	935.775			40643
1224	12.3467	12.4089	1224	0.981155	12	2;1	3	12.3806	939.389			68715
1225	12.3419	12.3829	1225	0.99971	4	1	2	12.3665	298.25			28817
1226	12.3583	12.3959	1226	0.998844	5	1	2	12.3785	207.936			17896
1227	12.3725	12.4324	1227	0.948721	6	1	2	12.3998	740.186			52369
1228	12.377	12.7536	1228	0.995249	81	2;3	3	12.5008	1384.6			5690985
1229	12.3681	12.3903	1229	0.990516	3	1	2	12.3761	226.975			18996
1230	12.3681	12.3725	1230	0.999151	3	1	2	12.3708	222.005			32886
1231	12.4089	12.6076	1231	0.980879	27	2	3	12.5022	1181.53			1056424
1232	12.4089	12.6076	1232	0.976761	44	2;3	3	12.5	1422.55			505626
1233	12.4216	12.7193	1233	0.999879	33	1	2	12.5709	218.166			149766
1234	12.4216	12.4994	1234	0.974079	4	4	2	12.4628	935.774			69451
1235	12.4216	12.5655	1235	0.958227	18	2	3	12.503	1406.59			364179
1236	12.4534	12.5183	1236	0.989817	6	2	3	12.4917	1444.53			124664
1237	12.4324	12.5183	1237	0.973767	5	2	3	12.4877	1460.5			122739
1238	12.5129	14.204	1238	0.999794	307	1	2	13.3331	227.224			170616
1239	12.5308	13.9812	1239	0.999304	270	1	2	13.2426	326			437614
1240	12.5183	13.9723	1240	0.99831	270	1	2	13.2405	327.997			443900
1241	12.5308	13.9513	1241	0.997657	265	1	2	13.2307	298.118			274925
1242	12.5457	14.0032	1242	0.999982	266	1	2	13.2453	390.276			154136
1243	12.5308	13.9111	1243	0.999989	218	1	2	13.19	216.952			80385
1244	12.5383	13.9295	1244	0.996777	183	1	2	13.1971	329.994			162950
1245	12.5511	13.8089	1245	0.999925	224	1	2	13.1713	220.146			83185
1246	12.5655	13.9886	1246	0.999849	221	1	2	13.2474	228.136			94830
1247	12.5714	13.7731	1247	0.999303	140	1	2	13.1828	740.187			55594
1248	12.5511	12.5967	1248	0.962576	6	4	3	12.5694	935.775			50173
1249	12.5457	13.1581	1249	0.999915	84	1	2	12.8658	216.099			82110
1250	12.5383	12.6255	1250	0.997893	11	2	3	12.5867	802.391			143514
1251	12.5714	13.7585	1251	0.999111	194	1	2	13.1523	276.918			67571
1252	12.5773	12.6539	1252	0.999978	6	1	2	12.6139	249.992			34350
1253	12.5967	12.6121	1253	0.999141	3	1	2	12.604	254.224			18698
1254	12.5773	13.72	1254	0.999591	190	1	2	13.1399	238.141			211531
1255	12.5773	12.6255	1255	0.989524	5	1	2	12.598	253.941			29629
1256	12.5829	13.0889	1256	0.998552	64	1	2	12.8279	281.213			31265
1257	12.5829	12.6255	1257	0.999443	7	1	2	12.6081	326.193			28729
1258	12.5773	12.8546	1258	0.999945	30	1	2	12.7104	295.136			115537
1259	12.5888	13.754	1259	0.999869	178	1	2	13.1634	278.151			122956
1260	12.5714	12.7913	1260	0.99321	17	1	2	12.6993	276.172			56880
1261	12.5967	12.6121	1261	0.992553	4	1	2	12.6043	255.256			26412
1262	12.6076	12.6822	1262	0.999672	8	1	2	12.6432	256.96			117238
1263	12.5888	13.7309	1263	0.998304	165	1	2	13.1183	370.093			86644
1264	12.6076	12.6657	1264	0.997492	7	1	2	12.6382	354.061			57970
1265	12.5967	12.7418	1265	0.994625	13	1	2	12.6651	226.975			23190
1266	12.621	12.6429	1266	0.94892	3	1	2	12.6292	221.104			14561
1267	12.6255	12.8392	1267	0.999971	22	1	2	12.7334	222.005			49929
1268	12.6023	12.7045	1268	0.988287	8	1	2	12.6648	283.287			21672
1269	12.6485	12.6657	1269	0.999553	3	1	2	12.6572	254.224			23440
1270	12.6598	12.6866	1270	0.999954	5	1	2	12.6728	326.193			29974
1271	12.6598	12.7477	1271	0.999874	7	1	2	12.7013	298.25			32896
1272	12.6598	12.6866	1272	0.999547	4	1	2	12.6758	207.936			18191
1273	12.6485	12.7	1273	0.998189	5	1	2	12.6814	310.162			36332
1274	12.6429	12.7734	1274	0.998854	15	1	2	12.7102	255.256			31522
1275	12.6911	12.7823	1275	0.99951	7	1	2	12.7299	249.992			29412
1276	12.7089	12.7957	1276	0.999925	9	1	2	12.7532	256.96			110872
1277	12.7308	13.4358	1277	0.99962	73	1	2	13.0934	326.193			33360
1278	12.7477	12.8813	1278	0.920729	9	1	2	12.8053	253.941			29450
1279	12.7134	12.7645	1279	0.99665	5	1	2	12.743	354.061			58467
1280	12.7308	12.7645	1280	0.998883	3	1	2	12.7439	310.162			31339
1281	12.7364	12.8046	1281	0.998171	4	1	2	12.7758	300.114			25104
1282	12.7418	12.7779	1282	0.987535	3	1	2	12.7628	207.936			16938
1283	12.769	12.8546	1283	0.939457	16	3	4	12.802	1820.77			84520
1284	12.7536	12.8106	1284	0.951993	4	1	2	12.7856	221.105			15405
1285	12.7536	13.3464	1285	0.996204	69	1	2	13.0699	218.166			134080
1286	12.7868	12.7957	1286	0.999918	3	1	2	12.791	298.25			29507
1287	12.7913	12.8274	1287	0.999101	5	1	2	12.8108	226.975			20985
1288	12.8221	12.8392	1288	0.998868	3	1	2	12.8316	301.188			84682
1289	12.8046	12.9617	1289	0.989457	13	1	2	12.8882	255.255			29040
1290	12.7913	12.8501	1290	0.998673	6	1	2	12.8233	354.062			67127
1292	12.8274	12.8813	1292	0.999787	6	1	2	12.8578	249.992			26157
1293	12.8221	12.8903	1293	0.967151	6	1	2	12.8579	260.123			39746
1294	12.8165	12.8501	1294	0.996001	3	1	2	12.8354	254.224			20136
1295	12.8221	12.8724	1295	0.996819	3	1	2	12.8488	276.172			63925
1296	12.8591	12.9298	1296	0.997056	6	1	2	12.8882	256.959			112002
1297	12.8635	12.9527	1297	0.9994	11	1	2	12.9075	298.25			32160
1298	12.8769	12.924	1298	0.996269	5	1	2	12.8978	354.061			58258
1299	12.8635	12.8858	1299	0.998694	4	1	2	12.8774	226.975			20137
1300	12.8813	13.1313	1300	0.999725	27	1	2	13.0039	295.136			119413
1301	12.8903	13.0889	1301	0.999778	20	1	2	12.9793	222.005			58917
1302	12.8769	12.9349	1302	0.999862	4	1	2	12.9006	310.162			35920
1303	12.8813	12.9181	1303	0.956505	4	1	2	12.8985	444.112			31281
1304	12.8947	13.0313	1304	0.999944	12	1	2	12.9643	219.174			29381
1306	12.9122	12.9298	1306	0.99827	3	1	2	12.9201	276.172			58935
1307	12.9122	12.9795	1307	0.999993	8	1	2	12.9452	249.992			28312
1308	12.9181	12.9617	1308	0.999993	6	1	2	12.9417	226.975			27515
1309	12.8903	12.9617	1309	0.986456	6	1	2	12.9249	283.286			19824
1310	12.9122	12.9483	1310	0.99069	3	1	2	12.9334	253.941			25446
1311	12.9349	12.9661	1311	0.996484	3	1	2	12.9518	254.224			22700
1312	12.9483	13.0151	1312	0.994889	8	1	2	12.9783	221.104			19889
1313	12.9572	13.0207	1313	0.998439	6	1	2	12.9922	276.172			63988
1314	12.9899	13.0151	1314	0.999999	3	1	2	13.0006	298.25			31098
1315	13.0014	13.1224	1315	0.994845	13	1	2	13.065	283.286			19537
1316	12.9899	13.026	1316	0.999143	3	1	2	13.0106	217.976			78684
1317	12.9706	13.0447	1317	0.999188	5	1	2	13.0087	207.936			18735
1318	13.0073	13.646	1318	0.999347	64	1	2	13.3222	255.255			34676
1319	13.0014	13.0581	1319	0.996721	5	1	2	13.0294	354.062			62788
1320	13.0151	13.0402	1320	0.968341	3	1	2	13.0315	444.112			35687
1321	13.0151	13.067	1321	0.999996	6	1	2	13.045	249.992			29669
1322	13.0402	13.1313	1322	0.986062	8	1	2	13.085	253.941			25613
1323	13.0447	13.1224	1323	0.999171	9	1	2	13.0842	298.25			35721
1325	13.0447	13.1757	1325	0.999709	9	1	2	13.1066	226.975			26869
1326	13.0625	13.0966	1326	0.999613	3	1	2	13.0749	235.931			108107
1327	13.0714	13.1179	1327	0.996238	5	1	2	13.0972	256.959			123976
1328	13.0889	13.1135	1328	0.999884	3	1	2	13.1017	276.172			45970
1329	13.1026	13.1313	1329	0.907937	4	2	3	13.1184	1457.53			39397
1330	13.0833	13.2029	1330	0.982036	21	2	2	13.1438	810.348			168174
1331	13.0889	13.1313	1331	0.958353	4	1	2	13.1085	444.112			41333
1332	13.1081	13.1475	1332	0.99884	4	1	2	13.1219	354.062			65197
1333	13.1179	13.1816	1333	0.993613	7	1	2	13.1496	281.213			23858
1334	13.1358	13.1985	1334	0.933557	10	2	3	13.1694	1216.51			65394
1335	13.0889	13.2208	1335	0.982469	9	1	2	13.1569	221.105			21362
1336	13.1081	13.1528	1336	0.99798	3	1	2	13.1269	249.992			23399
1337	13.1313	13.1641	1337	0.999997	3	1	2	13.144	206.977			42171
1338	13.1419	13.2798	1338	0.999928	13	1	2	13.2045	276.172			60682
1339	13.1581	13.4018	1339	0.9998	21	1	2	13.2842	298.25			37983
1340	13.1641	13.1985	1340	0.999199	3	1	2	13.179	235.931			105677
1341	13.1641	13.4152	1341	0.999718	28	1	2	13.282	295.136			114652
1342	13.17	13.3464	1342	0.999934	15	1	2	13.2677	253.941			30921
1343	13.1816	13.4241	1343	0.999997	23	1	2	13.311	222.005			46982
1344	13.1931	13.2252	1344	0.999502	4	1	2	13.2099	216.097			39539
1345	13.1985	13.3163	1345	0.999828	10	1	2	13.2532	249.992			26000
1346	13.1641	13.3119	1346	0.999657	10	1	2	13.2429	310.162			38421
1347	13.1641	13.2297	1347	0.992571	5	1	2	13.2046	283.287			25818
1348	13.2252	13.2668	1348	0.90864	6	3	4	13.2477	2093.95			26758
1349	13.2386	13.3341	1349	0.999996	9	1	2	13.2828	226.975			25088
1350	13.2252	13.3208	1350	0.999795	6	1	2	13.2747	219.174			27603
1351	13.2342	13.2475	1351	0.99988	3	1	2	13.2415	256.96			80760
1352	13.2475	13.3341	1352	0.999558	11	1	2	13.2944	216.099			62176
1353	13.2668	13.2985	1353	0.950437	4	1	2	13.2791	221.105			17963
1354	13.2612	13.3341	1354	0.97377	8	1	2	13.2964	354.062			63510
1355	13.2475	13.2985	1355	0.999884	4	1	2	13.2716	281.213			24030
1357	13.294	13.3297	1357	0.996692	3	1	2	13.3095	256.96			85663
1358	13.2742	13.3163	1358	0.99862	3	1	2	13.2961	266.136			31613
1359	13.3252	13.3697	1359	0.970402	4	1	2	13.3464	221.104			15727
1360	13.3297	13.4358	1360	0.999094	8	1	2	13.3773	235.931			122688
1361	13.3341	13.4196	1361	0.999284	9	1	2	13.3719	281.214			26724
1362	13.3386	13.3974	1362	0.976154	5	1	2	13.3715	444.111			37149
1363	13.3163	13.3795	1363	0.996968	4	1	2	13.3507	283.287			22430
1364	13.3641	13.4063	1364	0.999911	7	1	2	13.3832	216.098			62336
1365	13.3582	13.3974	1365	0.999738	3	1	2	13.3766	276.172			61629
1366	13.3697	13.3884	1366	0.975235	3	1	2	13.3774	260.123			44832
1367	13.3523	13.3929	1367	0.999972	3	1	2	13.3751	249.992			27978
1368	13.3751	13.4196	1368	0.996793	4	1	2	13.3932	256.959			119778
1369	13.384	13.4018	1369	0.999419	3	1	2	13.3941	219.174			26463
1370	13.384	13.4831	1370	0.99445	26	3;2	4	13.4351	1921.86			68789
1371	13.3884	13.4299	1371	0.999929	5	1	2	13.41	218.166			124532
1372	13.384	13.4152	1372	0.994569	3	1	2	13.3989	226.975			19203
1373	13.4018	13.4241	1373	0.996805	3	1	2	13.411	221.104			19444
1374	13.3929	13.4644	1374	0.999454	4	1	2	13.4274	248.962			26154
1375	13.4063	13.4535	1375	0.924078	5	3	3	13.4299	1930.82			34702
1376	13.4063	13.4535	1376	0.988674	4	1	2	13.4354	283.287			21865
1377	13.4299	13.4476	1377	0.999683	3	1	2	13.44	298.25			28095
1379	13.4358	13.7255	1379	0.998633	39	1	2	13.5726	216.097			57359
1380	13.4358	13.4831	1380	0.932176	5	1	2	13.4648	260.123			36614
1381	13.4591	13.5519	1381	0.995518	25	2;1	2	13.5017	673.338			103821
1383	13.4299	13.4742	1383	0.996396	4	1	2	13.4597	354.062			61298
1384	13.4535	13.5232	1384	0.997138	8	1	2	13.4956	281.213			29459
1385	13.4742	13.4965	1385	0.999748	3	1	2	13.4874	222.005			51503
1386	13.4787	13.7927	1386	0.999995	23	1	2	13.6306	298.25			33596
1387	13.4876	13.5232	1387	0.999915	6	1	2	13.5042	218.166			120393
1388	13.4787	13.6362	1388	0.999774	12	1	2	13.5664	326.193			26741
1389	13.5116	13.5466	1389	0.994363	5	1	2	13.5307	354.061			53152
1390	13.5173	13.5697	1390	0.999627	7	1	2	13.5446	219.174			26895
1391	13.5173	13.5519	1391	0.95484	5	1	2	13.5378	253.941			19644
1392	13.541	13.6188	1392	0.999221	8	1	2	13.5752	260.123			43902
1393	13.5351	13.6829	1393	0.999655	13	1	2	13.6139	276.172			69485
1394	13.5291	13.5466	1394	0.932453	3	3	4	13.5374	2164.98			26321
1395	13.501	13.5978	1395	1	9	1	2	13.5533	249.992			31449
1396	13.5173	13.6785	1396	0.999986	16	1	2	13.6007	295.136			130550
1397	13.5608	13.7081	1397	0.999995	13	1	2	13.6232	222.005			45657
1398	13.5653	13.5786	1398	0.968918	3	1	2	13.5706	221.105			18877
1399	13.5563	13.6415	1399	0.999939	8	1	2	13.6025	281.214			28371
1400	13.5742	13.5978	1400	0.964156	4	1	2	13.5881	283.287			20263
1401	13.5697	13.6128	1401	0.989112	4	1	2	13.5926	207.936			16374
1402	13.5653	14.195	1402	0.996812	56	1	2	13.8933	218.166			132928
1403	13.5875	13.6128	1403	0.999679	4	1	2	13.5977	253.941			25171
1405	13.6362	13.6504	1405	0.999999	3	1	2	13.6436	249.992			28788
1406	13.646	13.7585	1406	0.984074	23	3	4	13.698	1921.86			137796
1407	13.6504	13.7451	1407	0.990956	8	1	2	13.6925	253.941			29766
1408	13.6683	13.7496	1408	0.999801	8	1	2	13.7047	281.213			26885
1409	13.6727	13.7309	1409	0.974276	10	2	3	13.7025	1093.46			64314
1410	13.6415	13.6727	1410	0.997645	4	1	2	13.6562	283.287			21557
1411	13.6415	13.6963	1411	0.99906	6	1	2	13.6659	256.96			123488
1412	13.6362	13.7407	1412	0.998935	9	1	2	13.6779	226.975			22699
1413	13.6638	13.6918	1413	0.999219	4	1	2	13.6736	326.193			34915
1414	13.6785	13.6963	1414	0.999893	3	1	2	13.6868	249.992			30815
1415	13.6785	13.6963	1415	0.988854	3	1	2	13.6891	221.105			17839
1416	13.7022	13.7451	1416	0.947662	5	1	2	13.724	283.287			19355
1417	13.6874	13.7407	1417	0.997641	3	1	2	13.7202	260.123			49723
1418	13.6829	13.754	1418	0.999603	5	1	2	13.7195	255.255			28658
1419	13.7309	13.9164	1419	0.982378	53	3;2	4	13.809	1850.82			533602
1420	13.7362	13.8809	1420	0.953457	22	2	3	13.8084	1647.74			261503
1421	13.714	13.7642	1421	0.989774	3	1	2	13.7418	207.936			19394
1422	13.7451	13.8144	1422	0.999216	10	2	2	13.78	528.337			190989
1423	13.7496	13.8639	1423	0.984685	14	2;3	3	13.803	1888.77			89449
1424	13.7451	13.7821	1424	0.997296	3	1	2	13.7656	326.193			23959
1425	13.7496	13.9406	1425	0.99999	23	1	2	13.8512	238.141			307208
1426	13.754	13.7821	1426	0.999731	3	1	2	13.7648	222.005			46605
1427	13.72	13.8943	1427	0.999678	12	1	2	13.8115	276.172			72813
1428	13.7642	13.8197	1428	0.970207	6	2	3	13.7931	1872.8			45217
1429	13.754	13.9406	1429	0.999031	12	1	2	13.8622	216.099			46030
1430	13.8144	13.9295	1430	0.999198	14	1	2	13.8646	276.918			61058
1431	13.8312	13.8423	1431	0.999165	3	1	2	13.8371	281.213			28940
1432	13.8365	13.9002	1432	0.999896	6	1	2	13.8714	326.193			33864
1433	13.8365	13.9002	1433	0.994807	6	1	2	13.8644	278.151			113686
1434	13.8089	13.9239	1434	0.980105	9	1	2	13.875	370.093			73056
1435	13.8533	13.9295	1435	0.999999	11	1	2	13.8939	220.146			68805
1437	13.8533	13.8754	1437	0.999104	3	1	2	13.8648	255.255			28743
1438	13.8533	13.9634	1438	0.934325	31	3;2	3	13.9101	1907.81			214016
1439	13.8695	13.9111	1439	0.92817	6	2	3	13.8957	1704.73			48820
1440	13.8809	13.9634	1440	0.997876	18	2;3	3	13.9304	1792.78			179577
1441	13.8809	13.9111	1441	0.999971	3	1	2	13.8957	298.25			25688
1442	13.8869	13.9164	1442	0.933898	5	2;3	3	13.9029	1945.75			38307
1443	13.8943	13.9295	1443	0.999907	3	1	2	13.9117	235.931			120503
1444	13.8754	13.9239	1444	0.909287	5	1	2	13.9039	740.186			54423
1447	13.9058	13.9513	1447	0.933941	6	3	4	13.9286	2164.98			62528
1448	13.9239	14.096	1448	0.999429	30	2;1	3	14.0045	888.289			841807
1449	13.9295	14.0787	1449	0.999835	21	1	2	14.0025	647.263			1144845
1450	13.9723	14.0659	1450	0.948187	7	3	3	14.0115	2036.88			133768
1451	13.9886	14.1367	1451	0.968064	34	3;2	4	14.057	1992.9			384364
1452	13.9886	14.0585	1452	0.918496	7	3	3	14.0155	1921.86			208045
1453	14.0139	14.159	1453	0.999983	24	1	2	14.0995	238.141			376330
1454	14.0345	14.1679	1454	0.999328	19	1	2	14.1093	216.952			67755
1455	14.0213	14.1753	1455	0.999245	25	1	2	14.1049	326			522052
1456	14.0213	14.1753	1456	0.999487	26	1	2	14.103	327.997			437730
1457	14.0213	14.1753	1457	0.998982	22	1	2	14.106	329.994			138086
1458	14.0087	14.1679	1458	0.998752	23	1	2	14.1043	298.118			249819
1459	14.0511	14.1753	1459	0.999983	20	1	2	14.1191	228.135			71108
1460	14.0585	14.1679	1460	0.999901	12	1	2	14.1158	216.099			40181
1461	14.0659	14.11	1461	0.947501	6	4;3	4	14.084	2321.08			44503
1462	14.0659	14.1412	1462	0.999583	11	1	2	14.1077	255.255			35398
1463	14.0714	14.1278	1463	0.985308	16	2;3	3	14.0971	1898.75			52573
1464	14.0345	14.0847	1464	0.987425	3	1	2	14.0613	276.172			48599
1465	14.0585	14.1679	1465	0.997246	21	1	2	14.1125	390.276			147219
1466	14.0659	14.1501	1466	0.999813	15	1	2	14.1144	220.146			64560
1468	14.0847	14.1367	1468	0.999592	6	1	2	14.1064	283.199			37068
1469	14.0345	14.1679	1469	1	17	1	2	14.1081	276.918			55200
1470	14.0847	14.1457	1470	0.962747	9	1	2	14.1151	740.186			45074
1471	14.0659	14.1457	1471	0.998811	8	1	2	14.1114	281.213			28512
1472	14.096	14.1412	1472	0.998038	10	1	2	14.1185	278.151			96219
1473	14.1011	14.1679	1473	0.998594	8	1	2	14.1358	326.193			26842
1474	14.1011	14.1323	1474	0.954261	3	1	2	14.1177	444.111			27765
1475	14.1011	14.1412	1475	0.99667	6	1	2	14.1231	260.122			84503
1476	14.096	14.1412	1476	0.991637	5	1	2	14.1223	370.093			59114
1477	14.1145	14.1501	1477	0.998689	5	1	2	14.1301	298.25			37728
1478	14.1234	14.1501	1478	0.999963	5	1	2	14.1384	222.005			43791
1479	14.11	14.1501	1479	0.989308	5	1	2	14.1381	226.975			19939
1481	14.1367	14.159	1481	0.999989	3	1	2	14.1461	253.941			20086
1482	14.1457	14.1753	1482	0.999427	4	1	2	14.1569	276.171			66625
1483	14.1412	14.1679	1483	0.999594	3	1	2	14.1562	235.93			93650
1485	14.159	14.3033	1485	0.976946	21	2;3	3	14.2301	1760.67			310224
1486	14.159	14.2637	1486	0.990619	13	3;4	4	14.2132	2044.87			286854
1488	14.159	14.204	1488	0.964965	4	3	3	14.1856	2001.86			73742
1490	14.1679	14.2723	1490	0.983909	13	2	3	14.2233	1744.71			243312
1492	14.2457	14.336	1492	0.999731	9	1	2	14.2974	218.166			125229
1493	14.2637	14.4136	1493	0.999953	24	1	2	14.3399	238.141			406072
1494	14.2637	14.4	1494	0.998324	22	1	2	14.3384	298.118			247121
1495	14.2544	14.4424	1495	0.999635	28	1	2	14.3466	227.224			163518
1496	14.2723	14.4424	1496	0.999977	23	1	2	14.3514	325.999			502134
1497	14.2723	14.4424	1497	0.999208	25	1	2	14.3513	327.997			482120
1498	14.2723	14.3941	1498	0.997539	13	1	2	14.3381	329.994			138407
1499	14.2872	14.3726	1499	0.900143	22	2;3	4	14.3217	1880.8			112055
1500	14.2812	14.4424	1500	0.997337	44	1	2	14.3507	282.167			196292
1501	14.2812	14.4226	1501	0.999272	21	1	2	14.3483	216.952			92484
1502	14.2812	14.3612	1502	0.957415	14	3;2	4	14.3157	2036.88			85913
1503	14.2872	14.3305	1503	0.999745	5	1	2	14.3107	235.931			97309
1504	14.2926	14.7308	1504	0.999959	45	1	2	14.4922	228.147			205116
1505	14.2926	14.4226	1505	0.998894	21	1	2	14.3481	390.276			136589
1506	14.2926	14.4	1506	0.999948	17	1	2	14.348	276.918			66187
1507	14.3033	14.4	1507	0.930048	11	1	2	14.356	740.187			54193
1509	14.3193	14.4136	1509	0.999717	9	1	2	14.3643	220.146			72846
1510	14.3305	14.3612	1510	0.999866	3	1	2	14.35	216.1			43932
1511	14.3553	14.4424	1511	0.994279	13	2	3	14.4038	978.436			457639
1513	14.3193	14.4	1513	0.998824	8	1	2	14.3562	255.255			31876
1514	14.3667	14.4226	1514	0.999837	9	1	2	14.3952	775.358			162659
1515	14.3835	14.6341	1515	0.994776	56	2;3	4	14.48	1921.86			4701898
1516	14.3941	14.5733	1516	0.997471	23	2	3	14.4802	1718.78			1281093
1517	14.4	14.5733	1517	0.965207	26	3;2	4	14.4757	1959.8			751083
1518	14.3941	14.4692	1518	0.953113	8	4;3	4	14.438	2514.13			207120
1519	14.3726	14.4335	1519	0.99939	4	1	2	14.4045	218.166			127393
1520	14.3438	14.3941	1520	0.960618	3	1	2	14.3681	370.092			59397
1521	14.4136	14.5371	1521	0.985467	15	2;3	3	14.4792	1943.84			292404
1523	14.5002	14.7429	1523	0.999907	32	1	2	14.62	227.224			170508
1525	14.5192	14.7551	1525	0.997688	30	1	2	14.6357	234.161			440476
1526	14.5192	14.6341	1526	0.999998	11	1	2	14.5689	218.167			121812
1527	14.546	14.6024	1527	0.999244	6	1	2	14.5745	326			394925
1528	14.5002	14.6024	1528	0.999024	20	1	2	14.56	282.167			174731
1529	14.5371	14.6161	1529	1	11	1	2	14.5737	327.997			400510
1530	14.546	14.6024	1530	0.998058	5	1	2	14.5742	329.994			131495
1532	14.546	14.6252	1532	0.999618	9	1	2	14.5806	216.952			67792
1533	14.5514	14.7429	1533	0.999976	21	1	2	14.6458	238.141			490857
1534	14.5514	14.6024	1534	0.997819	6	1	2	14.5714	390.276			132122
1535	14.5567	14.7007	1535	0.96994	27	2;3	3	14.6173	1880.8			238066
1536	14.5567	14.6024	1536	0.989058	7	2;3	3	14.5743	1898.75			56757
1537	14.5621	14.6024	1537	0.999615	6	1	2	14.5783	298.118			216575
1538	14.5674	14.6024	1538	0.999934	4	1	2	14.5869	276.918			57888
1539	14.5788	14.7308	1539	0.927958	25	2;3	4	14.6432	1978.84			312938
1540	14.5733	14.6024	1540	0.999273	3	1	2	14.5875	235.931			103155
1541	14.546	14.6024	1541	0.997815	3	1	2	14.5749	276.172			66089
1543	14.6024	14.7214	1543	0.967002	26	3;2	3	14.6632	1888.73			294578
1544	14.6024	14.7308	1544	0.95965	15	2	3	14.6662	1872.76			236408
1545	14.6341	14.6892	1545	0.923338	4	2	3	14.6608	1926.68			98170
1546	14.6504	14.7551	1546	0.998142	17	1	2	14.7077	282.167			161310
1547	14.6341	14.6952	1547	0.904919	6	2	3	14.674	1910.71			98731
1548	14.6728	14.7429	1548	0.998171	7	1	2	14.7118	327.997			428870
1549	14.6952	14.7551	1549	0.979937	7	1	2	14.7204	218.167			122779
1550	14.6892	14.7429	1550	0.999167	6	1	2	14.7175	326			423395
1551	14.6952	14.7429	1551	0.997298	4	1	2	14.721	216.099			44767
1553	14.7081	14.7429	1553	0.991469	4	1	2	14.7224	390.276			139812
1554	14.6892	14.7429	1554	0.999884	3	1	2	14.7095	276.172			69047
1555	14.7007	14.7214	1555	0.999857	4	1	2	14.7119	298.118			260014
1556	14.6728	14.7551	1556	0.999919	6	1	2	14.7131	216.952			87789
1558	14.7429	14.8449	1558	0.933554	17	3;4;2	4	14.8	2115.9			1108050
1560	14.7551	14.8449	1560	0.900993	8	3	4	14.8041	1912.82			698246
1561	14.7659	14.8628	1561	0.990734	4	3;2	3	14.8204	2099.94			274252
1565	14.8717	15.0513	1565	0.942906	37	2;3	3	14.9358	1831.71			1672888
1566	14.8717	15.0424	1566	0.995201	19	2;3	3	14.9327	1815.74			1344328
1567	14.8806	15.0079	1567	0.967735	12	2	3	14.9295	1853.69			449130
1568	14.9074	14.9931	1568	0.954879	6	2	3	14.9377	1869.66			444593
1569	14.9767	15.1846	1569	0.999799	37	1	2	15.0907	282.167			183463
1570	14.9931	15.1616	1570	0.99974	20	1	2	15.0917	227.224			179303
1571	15.002	15.1753	1571	0.999757	23	1	2	15.0881	238.141			2097995
1572	15.002	15.1616	1572	0.999187	18	1	2	15.0929	327.997			466586
1573	15.0079	15.1753	1573	0.99845	26	1	2	15.0899	234.161			413209
1574	15.0079	15.1071	1574	0.94396	13	3;2	4	15.0569	2229.93			278011
1575	15.035	15.1616	1575	0.998642	15	1	2	15.1042	326			472263
1576	15.0424	15.1405	1576	0.99895	15	1	2	15.0923	260.123			727176
1577	15.0424	15.0588	1577	0.999859	3	1	2	15.0519	216.952			79638
1578	15.0079	15.133	1578	0.996201	7	1	2	15.0725	276.172			64595
1579	15.0513	15.1527	1579	0.999991	14	1	2	15.0945	283.199			265811
1581	15.0588	15.1405	1581	0.997911	6	1	2	15.0945	255.167			244533
1582	15.0753	15.133	1582	0.999	5	1	2	15.1038	295.136			127823
1583	15.093	15.1753	1583	0.999925	8	1	2	15.1275	218.166			133193
1584	15.1026	15.1527	1584	0.997763	4	1	2	15.1243	329.994			117921
1586	15.1026	15.1616	1586	0.999873	4	1	2	15.1269	276.918			47148
1587	15.113	15.1527	1587	0.999724	4	1	2	15.1334	298.118			249987
1588	15.1071	15.133	1588	0.999279	4	1	2	15.1182	216.952			81072
1590	15.1185	15.1616	1590	0.995924	4	2	3	15.1461	1619.71			78126
1591	15.1026	15.1616	1591	0.999983	7	1	2	15.1345	228.135			76720
1592	15.1071	15.1527	1592	0.999985	5	1	2	15.1321	390.276			152606
1593	15.093	15.1405	1593	0.999884	5	1	2	15.1197	235.931			102511
1594	15.1405	15.3176	1594	0.993716	33	2;3	3	15.2258	1831.71			1327036
1595	15.1616	15.3399	1595	0.998404	16	2	3	15.2265	1815.74			921321
1596	15.1616	15.2553	1596	0.954525	9	2;3	3	15.2068	1869.66			291127
1597	15.1616	15.2645	1597	0.979236	10	2	3	15.2146	1853.69			387128
1598	15.1846	15.2553	1598	0.990713	7	2	3	15.2173	1628.63			258913
1599	15.1846	15.2466	1599	0.988198	5	2	3	15.2185	1837.73			257877
1601	15.2645	15.3552	1601	0.917644	8	3	4	15.3036	2229.93			315087
1603	15.2911	15.5976	1603	0.965134	80	2;3	4	15.4342	2107.92			561250
1604	15.2911	15.3324	1604	0.91886	6	2;3	3	15.3028	1959.77			156449
1605	15.2911	15.896	1605	0.999975	143	1	2	15.6069	282.167			186368
1606	15.3	15.8901	1606	0.999957	85	1	2	15.6018	227.224			174916
1607	15.3176	15.8901	1607	0.998291	110	1	2	15.6099	234.161			492483
1608	15.3265	15.4273	1608	0.998846	15	3	4	15.3727	2236.96			170750
1609	15.3	15.3324	1609	0.971638	3	2	3	15.316	1943.8			123011
1610	15.3265	15.3954	1610	0.913571	4	3	4	15.3494	2145.87			88149
1611	15.3	15.5976	1611	0.999924	43	1	2	15.4564	238.141			528335
1612	15.3606	15.5794	1612	0.997468	34	1	2	15.4713	326			445099
1613	15.366	15.5883	1613	0.998036	35	1	2	15.477	327.997			441884
1614	15.3492	15.4088	1614	0.999965	3	1	2	15.3776	218.166			123793
1615	15.3606	15.572	1615	0.998797	22	1	2	15.4726	276.918			69649
1616	15.384	15.5883	1616	0.999942	16	1	2	15.4878	228.136			64493
1617	15.384	15.5794	1617	0.999955	29	1	2	15.4773	390.276			144386
1618	15.3399	15.8901	1618	0.999594	58	1	2	15.6212	216.952			87910
1619	15.3719	15.5794	1619	0.996985	21	1	2	15.4702	329.994			139335
1620	15.3552	15.4013	1620	0.999632	3	1	2	15.3784	276.172			77674
1621	15.3954	15.5631	1621	0.999668	23	1	2	15.4767	298.118			267836
1622	15.4088	15.4273	1622	0.999179	3	1	2	15.4176	220.146			61224
1623	15.3719	15.5469	1623	0.999664	8	1	2	15.4673	216.1			53714
1624	15.4013	15.5304	1624	0.988861	9	1	2	15.4732	740.186			58864
1625	15.4216	15.4768	1625	0.996789	5	1	2	15.4477	255.256			32166
1626	15.4161	15.4715	1626	0.999852	3	1	2	15.445	298.25			30372
1627	15.4494	15.491	1627	0.920346	5	2	3	15.4768	1904.84			56795
1628	15.4715	15.497	1628	0.999994	3	1	2	15.4866	218.166			110442
1629	15.4547	15.541	1629	0.912529	11	3	4	15.4912	2145.87			79251
1630	15.4715	15.4821	1630	0.999672	3	1	2	15.4764	276.172			54216
1631	15.525	15.5469	1631	0.999868	3	1	2	15.5373	220.146			56276
1632	15.541	15.5578	1632	0.991363	3	1	2	15.5512	326.193			29642
1633	15.525	15.5578	1633	0.99913	6	1	2	15.543	276.172			72690
1636	15.5631	15.7508	1636	0.9777	28	3;2;4	4	15.6396	1902.75			398564
1637	15.5794	15.6439	1637	0.969619	7	2	3	15.6179	1886.78			163964
1638	15.572	15.7133	1638	0.996719	9	1	2	15.6335	218.166			140932
1639	15.5883	15.6439	1639	0.916258	3	3	3	15.6249	1699.67			180390
1640	15.6648	15.8812	1640	0.999297	33	1	2	15.7809	326			498363
1641	15.6901	15.8722	1641	0.99918	30	1	2	15.7847	298.118			241914
1642	15.696	15.8812	1642	0.996704	22	1	2	15.7958	329.994			130499
1643	15.7133	15.8593	1643	0.999989	22	1	2	15.7901	220.146			60996
1644	15.7133	15.7561	1644	0.9237	7	2	3	15.7331	1850.82			44642
1646	15.7133	15.8812	1646	0.999375	20	1	2	15.7958	228.135			63229
1647	15.7074	15.8533	1647	0.997586	13	1	2	15.7699	276.172			70568
1648	15.7019	15.8722	1648	0.998744	31	1	2	15.7851	238.141			384291
1649	15.6827	15.8812	1649	0.998351	34	1	2	15.7833	327.997			433348
1650	15.696	15.8901	1650	0.994767	31	1	2	15.7923	390.275			164575
1651	15.7133	15.7454	1651	0.907355	6	3	4	15.7309	2300.97			62965
1652	15.7188	15.8722	1652	0.998015	19	1	2	15.7853	276.918			63952
1653	15.7242	15.8419	1653	0.999701	12	1	2	15.7878	216.099			44044
1654	15.7133	15.8722	1654	0.999522	22	1	2	15.7921	255.167			34178
1655	15.7401	15.7753	1655	0.999712	4	1	2	15.7527	281.214			29210
1656	15.7454	15.7927	1656	0.999697	5	1	2	15.7731	283.287			24753
1657	15.7295	15.8722	1657	0.994244	15	1	2	15.8036	740.186			52145
1658	15.7242	15.8148	1658	0.934482	7	2	3	15.7771	1898.75			46376
1659	15.7295	15.8533	1659	0.999385	9	1	2	15.8021	278.151			104578
1660	15.7454	15.8148	1660	0.999456	5	1	2	15.7751	235.931			87232
1661	15.7561	15.7812	1661	0.998725	3	1	2	15.7662	218.167			139789
1662	15.7401	15.7753	1662	0.999959	3	1	2	15.7605	295.136			108416
1663	15.7401	15.7927	1663	0.999982	3	1	2	15.768	298.25			30397
1664	15.7753	15.8419	1664	0.955317	6	1	2	15.8038	370.093			56185
1665	15.7986	15.8593	1665	0.999996	7	1	2	15.8287	249.992			27796
1666	15.7986	15.8419	1666	0.99826	5	1	2	15.822	326.193			21503
1667	15.8308	15.8533	1667	0.902028	3	2;3	3	15.8476	1965.85			34903
1668	15.8308	15.8648	1668	0.998599	3	1	2	15.8473	281.213			26392
1669	15.8361	15.9228	1669	0.975881	12	2	3	15.8937	1164.5			876066
1670	15.8419	15.8648	1670	0.999909	4	1	2	15.8517	222.005			53676
1671	15.8648	16.4531	1671	0.981857	63	2;3	3	15.9944	1886.78			8954564
[truncated: 1,602 more rows]

## Sheet: Average WT
Average values																Individual datasets
[truncated: 66 more rows]
