# Supplementary material for: PGFinder, a novel analysis pipeline for the consistent, reproducible, and high-resolution structural analysis of bacterial peptidoglycans
Source: eLife. 2021 Sep 28;10:e70597. doi: 10.7554/eLife.70597 (PMC8478412; doi:10.7554/eLife.70597)
Supplement: Table 1—source data 4. [file elife-70597-table1-data4.csv]

Structure	Monoisotopicmass
GM|0	498.2061
GM (x2)|0	976.386
GM (x3)|0	1454.5659
GM-AE|1	698.2858
GM-AEJ|1	870.3706
GM-AEJA|1	941.4077
GM-AEJAA|1	1012.4448
GM-AEJC|1	973.3843
GM-AEJCA|1	1044.4214
GM-AEJCC|1	1076.3935
GM-AEJCE|1	1101.4792
GM-AEJCG|1	1030.4058
GM-AEJCH|1	1110.4432
GM-AEJCK|1	1101.4793
GM-AEJCN|1	1087.4272
GM-AEJCP|1	1070.4371
GM-AEJCS|1	1060.4163
GM-AEJD|1	985.4023
GM-AEJDA|1	1056.4394
GM-AEJDC|1	1088.4115
GM-AEJDD|1	1100.4292
GM-AEJDE|1	1113.4972
GM-AEJDG|1	1042.4238
GM-AEJDH|1	1122.4612
GM-AEJDN|1	1099.4452
GM-AEJDP|1	1082.4551
GM-AEJDQ|1	1113.4609
GM-AEJDT|1	1086.45
GM-AEJDW|1	1171.4816
GM-AEJE|1	999.4183
GM-AEJEA|1	1070.4554
GM-AEJED|1	1114.4452
GM-AEJEE|1	1127.5132
GM-AEJEG|1	1056.4398
GM-AEJEH|1	1136.4772
GM-AEJEI|1	1112.5024
GM-AEJEN|1	1113.4612
GM-AEJES|1	1086.4503
GM-AEJEV|1	1098.4867
GM-AEJF|1	1017.4433
GM-AEJFA|1	1088.4804
GM-AEJFC|1	1120.4525
GM-AEJFD|1	1132.4702
GM-AEJFE|1	1145.5382
GM-AEJFF|1	1164.5117
GM-AEJFG|1	1074.4648
GM-AEJFH|1	1154.5022
GM-AEJFI|1	1130.5274
GM-AEJFK|1	1145.5383
GM-AEJFN|1	1131.4862
GM-AEJFP|1	1114.4961
GM-AEJFQ|1	1145.5019
GM-AEJFR|1	1173.5444
GM-AEJFS|1	1104.4753
GM-AEJFT|1	1118.491
GM-AEJFV|1	1116.5117
GM-AEJFW|1	1203.5226
GM-AEJFY|1	1180.5066
GM-AEJG|1	927.392
GM-AEJGA|1	998.4292
GM-AEJGG|1	984.4135
GM-AEJGH|1	1064.451
GM-AEJGM|1	1058.4325
GM-AEJGP|1	1024.4448
GM-AEJGQ|1	1055.4506
GM-AEJGR|1	1083.4932
GM-AEJGS|1	1014.4241
GM-AEJGV|1	1026.4605
GM-AEJGW|1	1113.4714
GM-AEJH|1	1007.4343
GM-AEJHA|1	1078.4714
GM-AEJHE|1	1135.5292
GM-AEJHH|1	1144.4932
GM-AEJHP|1	1104.4871
GM-AEJHQ|1	1135.4929
GM-AEJHS|1	1094.4663
GM-AEJHT|1	1108.482
GM-AEJHW|1	1193.5136
GM-AEJI|1	983.4593
GM-AEJIA|1	1054.4964
GM-AEJID|1	1098.4862
GM-AEJIE|1	1111.5542
GM-AEJIH|1	1120.5182
GM-AEJII|1	1096.5434
GM-AEJIK|1	1111.5543
GM-AEJIN|1	1097.5022
GM-AEJIP|1	1080.5121
GM-AEJIQ|1	1111.5179
GM-AEJIS|1	1070.4913
GM-AEJIT|1	1084.507
GM-AEJIW|1	1169.5386
GM-AEJK|1	998.4703
GM-AEJKA|1	1069.5074
GM-AEJKD|1	1113.4972
GM-AEJKE|1	1126.5652
GM-AEJKG|1	1055.4918
GM-AEJKH|1	1135.5292
GM-AEJKI|1	1111.5544
GM-AEJKK|1	1126.5653
GM-AEJKN|1	1112.5132
GM-AEJKP|1	1095.5231
GM-AEJKQ|1	1126.5289
GM-AEJKR|1	1154.5667
GM-AEJKT|1	1099.518
GM-AEJKW|1	1184.5496
GM-AEJL|1	983.4593
GM-AEJLC|1	1086.4685
GM-AEJLG|1	1040.4808
GM-AEJLV|1	1082.5277
GM-AEJM|1	1001.4153
GM-AEJMA|1	1072.4524
GM-AEJMC|1	1104.4245
GM-AEJMD|1	1116.4422
GM-AEJME|1	1129.5102
GM-AEJMF|1	1148.4837
GM-AEJMH|1	1138.4742
GM-AEJMI|1	1114.4994
GM-AEJMK|1	1129.5103
GM-AEJMM|1	1132.4558
GM-AEJMN|1	1115.4582
GM-AEJMP|1	1098.4681
GM-AEJMQ|1	1129.4739
GM-AEJMS|1	1088.4473
GM-AEJMT|1	1102.463
GM-AEJMV|1	1100.4837
GM-AEJMW|1	1187.4946
GM-AEJMY|1	1164.4786
GM-AEJNA|1	1055.4554
GM-AEJNE|1	1112.5132
GM-AEJNG|1	1041.4398
GM-AEJNH|1	1121.4772
GM-AEJNN|1	1098.4612
GM-AEJNP|1	1081.4711
GM-AEJNQ|1	1112.4769
GM-AEJNT|1	1085.466
GM-AEJNW|1	1170.4976
GM-AEJP|1	967.4283
GM-AEJPA|1	1038.4654
GM-AEJPE|1	1095.5232
GM-AEJPP|1	1064.4811
GM-AEJPQ|1	1095.4869
GM-AEJPT|1	1068.476
GM-AEJPW|1	1153.5076
GM-AEJQA|1	1069.4714
GM-AEJQC|1	1101.4435
GM-AEJQE|1	1126.5292
GM-AEJQG|1	1055.4558
GM-AEJQQ|1	1126.4929
GM-AEJQS|1	1085.4663
GM-AEJQT|1	1099.482
GM-AEJQW|1	1184.5136
GM-AEJR|1	1026.4753
GM-AEJRA|1	1097.5124
GM-AEJRC|1	1129.4845
GM-AEJRD|1	1141.5022
GM-AEJRE|1	1154.5702
GM-AEJRH|1	1163.5342
GM-AEJRI|1	1139.5594
GM-AEJRM|1	1157.5158
GM-AEJRN|1	1140.5182
GM-AEJRP|1	1123.5281
GM-AEJRQ|1	1154.5339
GM-AEJRR|1	1182.5764
GM-AEJRT|1	1127.523
GM-AEJRV|1	1125.5437
GM-AEJRW|1	1212.5546
GM-AEJS|1	957.4073
GM-AEJSA|1	1028.4444
GM-AEJSD|1	1072.4342
GM-AEJSE|1	1085.5022
GM-AEJSK|1	1085.5023
GM-AEJSN|1	1071.4502
GM-AEJSP|1	1054.4601
GM-AEJSQ|1	1085.4659
GM-AEJSR|1	1113.5084
GM-AEJSS|1	1044.4393
GM-AEJST|1	1058.455
GM-AEJSW|1	1143.4866
GM-AEJT|1	971.4233
GM-AEJTA|1	1042.4604
GM-AEJTC|1	1074.4325
GM-AEJTE|1	1099.5182
GM-AEJTG|1	1028.4448
GM-AEJTK|1	1099.5183
GM-AEJTT|1	1072.471
GM-AEJTV|1	1070.4917
GM-AEJV|1	969.4433
GM-AEJVA|1	1040.4804
GM-AEJVC|1	1072.4525
GM-AEJVD|1	1084.4702
GM-AEJVE|1	1097.5382
GM-AEJVH|1	1106.5022
GM-AEJVK|1	1097.5383
GM-AEJVN|1	1083.4862
GM-AEJVP|1	1066.4961
GM-AEJVQ|1	1097.5019
GM-AEJVS|1	1056.4753
GM-AEJVT|1	1070.491
GM-AEJVV|1	1068.5117
GM-AEJVW|1	1155.5226
GM-AEJW|1	1056.4553
GM-AEJWA|1	1127.4924
GM-AEJWC|1	1159.4645
GM-AEJWE|1	1184.5502
GM-AEJWT|1	1157.503
GM-AEJWW|1	1242.5346
GM-AEJY|1	1033.4353
GM-AEJYA|1	1104.4724
GM-AEJYC|1	1136.4445
GM-AEJYD|1	1148.4622
GM-AEJYE|1	1161.5302
GM-AEJYG|1	1090.4568
GM-AEJYH|1	1170.4942
GM-AEJYI|1	1146.5194
GM-AEJYK|1	1161.5303
GM-AEJYN|1	1147.4782
GM-AEJYP|1	1130.4881
GM-AEJYQ|1	1161.4939
GM-AEJYR|1	1189.5364
GM-AEJYS|1	1120.4673
GM-AEJYT|1	1134.483
GM-AEJYV|1	1132.5037
GM-AEJYW|1	1219.5146
GM-AEJYY|1	1196.4986
