# Supplementary material for: PGFinder, a novel analysis pipeline for the consistent, reproducible, and high-resolution structural analysis of bacterial peptidoglycans
Source: eLife. 2021 Sep 28;10:e70597. doi: 10.7554/eLife.70597 (PMC8478412; doi:10.7554/eLife.70597)
Supplement: Table 1—source data 5. [file elife-70597-table1-data5.xlsx]

## Sheet: FINAL table complex search
		Structure	RT (min)				Abundance (%)				Monoisotopic mass (Da)
			Av		SD		Av		SD		Obs	Theo	Dppm
		GM|0	3.61612	±	0.00551493		0.032007	±	0.0103521		498.205	498.206	2.50656
Glycan chains		GM (x2)|0	10.1091	±	0.0292827		0.00395459	±	0.0029485		976.384	976.386	2.21897		* no M S2 sacns
	0.0404464	GM (Anhydro) |0 *	8.20428	±	1.9151		0.00219682	±	0.000538598		478.179	478.18	2.91862
±	0.0037	GM (Deacetyl) |0 *	2.57247	±	0.00413217		0.00143082	±	0.000473338		456.194	456.196	3.51355
		GM (x2) (Deacetyl) |0	6.85985	±	0.0190567		0.000857145	±	0.000245609		934.372	934.375	3.24175
		GM-AEJA|1	10.0387	±	0.0433102		0.333444	±	0.0406386		941.405	941.408	2.80031
		GM-AEJ|1	6.566	±	0.0123278		0.132574	±	0.0273071		870.368	870.371	2.96951
		GM-AEJKR|1	9.55795	±	0.0485515		0.0741767	±	0.0210425		1154.56	1154.57	3.58911
		GM-AEJK|1	8.3608	±	0.0594698		0.0512635	±	0.00823879		998.463	998.47	7.42696
		GM-AE|1	9.57388	±	0.0440573		0.0167091	±	0.00511493		698.284	698.286	3.1261
		GM-AEJG|1	7.85492	±	0.0530566		0.0063608	±	0.00162312		927.39	927.392	2.30106
		GM-AEJ (Anhydro) |1	13.9849	±	0.015183		0.00617477	±	0.00136352		850.342	850.344	2.23948
		GM-AEJA (Anhydro) |1	16.5471	±	0.00919237		0.00528903	±	0.00124322		921.38	921.381	1.9904
		GM-AEJDK|1	9.6549	±	0.0478423		0.0047313	±	0.00101963		1113.49	1113.5	7.55848
		GM-AEJAG|1	9.45206	±	0.0489778		0.0020241	±	0.000454756		998.426	998.429	3.1247
Monomers		GM-AEJKR (Anhydro) |1	14.8336	±	0.0128753		0.0014825	±	0.000518942		1134.54	1134.54	2.90437
	0.642936	GM-AEJAK|1	9.47478	±	0.055633		0.000981755	±	7.18911e-05		1069.5	1069.51	7.70483
±	0.0107	GM-AEJN|1	5.90494	±	0.0100957		0.000894074	±	0.000185756		984.411	984.414	2.62782
		GM-AEJK (Anhydro) |1	14.4022	±	0.00835214		0.000836922	±	0.000131103		978.437	978.444	7.39635
		GM-AEJF|1	20.9606	±	0.0103227		0.000826882	±	0.000235724		1017.44	1017.44	6.44654
		GM-AEJA (Deacetyl) |1	8.57324	±	0.0557396		0.000762666	±	0.000349887		899.394	899.397	3.08729
		GM-GM-AEJA|1	13.0995	±	0.0159821		0.000688546	±	0.000344459		1419.58	1419.59	2.88097
		GM-AE (Anhydro) |1	17.4433	±	0.00927708		0.000639505	±	0.000199096		678.258	678.26	2.77499
		M-AEJ|1	4.55777	±	0.0144801		0.000573382	±	0.000447311		667.289	667.291	3.81977
		M-AEJKR|1	8.15882	±	0.0628775		0.00037373	±	0.047%*		951.484	951.487	3.26224
		GM-AEJAA|1	11.3753	±	0.0406359		0.000544631	±	0.000123608		1012.44	1012.44	2.35343
		M-AEJA|1	8.51843	±	0.0527541		0.000487194	±	0.000117387		738.325	738.328	4.01822
		GM-GM-AEJ|1	11.309	±	0.0395174		0.000387461	±	0.000205987		1348.55	1348.55	2.37587
		GM-AEJDK (Anhydro) |1	14.4094	±	0.706891		0.000372508	±	0.000202347		1093.46	1093.47	6.99393
		GM-AEJ (Deacetyl) |1	4.77006	±	0.0121886		0.000223582	±	8.68299e-05		828.358	828.36	3.04407
		GM-GM-AEJKR|1	12.1811	±	0.0345756		6.59153e-05	±	0.001%*		1632.74	1632.75	3.04465
		M-AEJK|1	6.10095	±	0.0175793		4.73761e-05	±	0.002%*		795.384	795.391	8.83073
		GM-AEJA-GM-AEJA|2	16.014	±	0.0160118		0.15931	±	0.0229634		1864.8	1864.8	2.25843
		GM-AEJKR-GM-AEJA|2	14.8336	±	0.0181393		0.0423893	±	0.0132835		2077.96	2077.96	3.04855
		GM-AEJA-GM-AEJ|2	15.0858	±	0.0207921		0.0296191	±	0.00702867		1793.76	1793.77	2.57993
		GM-AEJK-GM-AEJA|2	14.4884	±	0.0100811		0.0104528	±	0.00166237		1921.86	1921.87	5.114
		GM-AEJA-GM-AEJA (Anhydro) |2	20.5591	±	0.00827025		0.00806128	±	0.00168791		1844.77	1844.78	2.39563
		GM-AEJKR-GM-AEJ|2	14.2208	±	0.00153923		0.00789941	±	0.00242499		2006.92	2006.93	3.27757
		GM-AEJKR-GM-AEJA (Anhydro) |2	18.8869	±	0.168971		0.00614713	±	0.00187324		2057.93	2057.94	1.79009
		GM-AEJ-GM-AEJ|2	14.2278	±	0.00515767		0.00515596	±	0.00154198		1722.73	1722.73	3.02243
		GM-AEJG-GM-AEJA|2	14.6753	±	0.01317		0.00383887	±	0.000927771		1850.78	1850.79	2.36692
		GM-AEJ-GM-AEJA (Anhydro) |2	19.657	±	0.0145253		0.00352319	±	0.00071912		1773.74	1773.74	2.08393
Dimers		GM-AEJ-JEA|2	10.3616	±	0.0382519		0.00034603	±	0.000131869		1242.53	1242.53	2.4555
	0.288604	GM-AEJGA-GM-AEJA|2	15.3307	±	0.0189802		0.00165244	±	0.000314859		1921.82	1921.83	2.1967
±	0.0045	GM-AEJKR-GM-AEJ (Anhydro) |2	18.0742	±	0.0141414		0.00157133	±	0.000489665		1986.9	1986.9	2.10456
		GM-AEJK-GM-AEJ|2	13.7949	±	0.0101589		0.00153563	±	0.000349943		1850.82	1850.83	4.97993
		GM-AEJ-GM-AEJ (Anhydro) |2	18.7737	±	0.0114831		0.00130434	±	0.000375067		1702.7	1702.7	4.49442
		GM-AEJK-GM-AEJA (Anhydro) |2	18.6786	±	0.0366062		0.00110711	±	0.000244335		1901.83	1901.84	4.6405
		GM-AEJAK-GM-AEJA|2	14.0493	±	0.00617023		0.00072429	±	0.000198195		1992.9	1992.9	4.55949
		GM-AEJAA-GM-AEJA|2	16.5376	±	0.0145614		0.000695897	±	0.000145751		1935.84	1935.84	2.13636
		GM-AEJG-GM-AEJ|2	13.9114	±	0.00863332		0.000498804	±	0.000119257		1779.75	1779.75	2.67243
		GM-AEJN-GM-AEJA|2	13.8924	±	0.0128617		0.000477231	±	9.88698e-05		1907.81	1907.81	2.51204
		GM-GM-AEJA-GM-AEJA|2	17.5104	±	0.00803043		0.000425121	±	0.000233893		2342.98	2342.98	3.64815
		GM-AEJDK-GM-AEJA|2	14.0078	±	0.00703622		0.000412832	±	9.54456e-05		2036.88	2036.89	5.30167
		GM-AEJK-GM-AEJ (Anhydro) |2	17.9383	±	0.10965		0.000324172	±	4.66052e-05		1830.8	1830.8	4.00179
		GM-AEJA-GM-AEJA (Deacetyl) |2	15.1732	±	0.00756628		0.000269115	±	0.000142987		1822.79	1822.79	2.98638
		M-AEJA-GM-AEJA|2	16.6873	±	0.00961499		0.000132094	±	0.006%*		1661.72	1661.73	1.57022
		GM-AEJG-GM-AEJA (Anhydro) |2	19.1232	±	0.00743895		0.000190407	±	4.50039e-05		1830.76	1830.76	0.722891
		GM-AEJGA-GM-AEJA (Anhydro) |2	19.7334	±	0.0118737		0.000176806	±	4.79526e-05		1901.8	1901.8	2.07527
		GM-AEJF-GM-AEJA|2	24.3789	±	0.00378773		0.000157868	±	4.12283e-05		1940.83	1940.84	3.60437
		GM-AEJAA-GM-AEJA (Anhydro) |2	21.166	±	0.0165485		0.000140448	±	1.6198e-05		1915.81	1915.82	1.79448
		GM-AEJDK-GM-AEJ|2	15.8645	±	0.0169094		3.24885e-05	±	0.000%*		1965.85	1965.86	4.25007
		GM-AEJN-GM-AEJ|2	13.2292	±	0.00861555		3.16965e-05	±	0.001%*		1836.77	1836.77	2.83883
		GM-AEJA-GM-AEJA-GM-AEJA|3	18.8591	±	0.00898956		0.016174	±	0.00510319		2788.19	2788.2	3.49247
		GM-AEJ-GM-AEJA-GM-AEJA|3	18.2348	±	0.206197		0.00342593	±	0.000928386		2717.16	2717.16	2.21699
		GM-AEJA-GM-AEJA-GM-AEJA (Anhydro) |3	22.3876	±	0.0155655		0.00204669	±	0.000617486		2768.17	2768.18	2.27725
		GM-AEJKR-GM-AEJA-GM-AEJA|3	17.5408	±	0.0118394		0.00191575	±	0.000625819		3001.35	3001.36	3.36906
		GM-AEJ-GM-AEJA-GM-AEJA (Anhydro) |3	21.6006	±	0.0201627		0.00107751	±	0.000226433		2697.13	2697.14	1.82022
		GM-AEJKR-GM-AEJA-GM-AEJA (Anhydro) |3	20.8984	±	0.161527		0.000809451	±	0.000357764		2981.33	2981.33	2.23841
Trimers		GM-AEJK-GM-AEJA-GM-AEJA|3	17.4136	±	0.0101924		0.000593551	±	0.000149271		2845.25	2845.26	3.8866
	0.0280145	GM-AEJG-GM-AEJA-GM-AEJA|3	17.7225	±	0.0132835		0.000355989	±	0.000100859		2774.18	2774.19	1.351
±	0.0033	GM-AEJK-GM-AEJA-GM-AEJA (Anhydro) |3	20.7545	±	0.0332366		0.000313569	±	5.74596e-05		2825.23	2825.24	3.39003
		GM-AEJ-GM-AEJ-GM-AEJA|3	17.4485	±	0.0101583		0.000268249	±	9.50118e-05		2646.12	2646.13	1.74954
		GM-AEJ-GM-AEJ-GM-AEJA (Anhydro) |3	21.1643	±	0.0137418		0.000233794	±	4.17233e-05		2626.1	2626.1	1.91951
		GM-AEJKR-GM-AEJ-GM-AEJA|3	17.1137	±	0.0132466		0.000206748	±	5.11526e-05		2930.32	2930.32	2.66092
		GM-AEJGA-GM-AEJA-GM-AEJA|3	18.2447	±	0.013414		0.000198594	±	4.38134e-05		2845.22	2845.22	1.99069
		GM-AEJKR-GM-AEJ-GM-AEJA (Anhydro) |3	20.3131	±	0.0214541		0.000104961	±	0.007%*		2910.29	2910.3	1.73002
		GM-AEJG-GM-AEJA-GM-AEJA (Anhydro) |3	21.2095	±	0.0150519		6.71606e-05	±	0.005%*		2754.16	2754.16	1.12199
		GM-AEJAA-GM-AEJA-GM-AEJA|3	19.2322	±	0.0109585		8.81147e-05	±	6.88124e-05		2859.23	2859.24	1.31045
		GM-AEJK-GM-AEJ-GM-AEJA|3	16.9426	±	0.0150265		8.15284e-05	±	1.65945e-05		2774.22	2774.23	3.37348
		GM-AEJGA-GM-AEJA-GM-AEJA (Anhydro) |3	21.7679	±	0.0118166		5.28911e-05	±	0.003%*		2825.19	2825.2	2.77691
		*, calculated from 2 values
