# Supplementary material for: PGFinder, a novel analysis pipeline for the consistent, reproducible, and high-resolution structural analysis of bacterial peptidoglycans
Source: eLife. 2021 Sep 28;10:e70597. doi: 10.7554/eLife.70597 (PMC8478412; doi:10.7554/eLife.70597)
Supplement: Table 2—source data 1. [file elife-70597-table2-data1.xlsx]

## Sheet: Table 2 - supplement 1
Matched muropeptides not reported previously
Inferred Structure	Mass			∆ppm
	Theoretical		Observed	This work	Anderson et al
GM (x2) (Deacetyl-Anhydro)	914.349		914.339	11.4507	ND
GM (x4) (Deacetyl)	1890.74		1890.73	3.85501	ND
GM (x4) (Anhydro)	1912.72		1912.72	0.0570841	ND
GM (x2) (Amidated)	975.402		975.399	3.1241	ND
GM-GM-AEJRH	1641.73		1641.69	22.5987	ND
GM-AEJSD	1072.43		1072.44	-7.10428	ND
GM-AEJKW	1184.55		1184.53	20.4396	ND
GM-AEJH	1007.43		1007.43	8.43725	ND
M-AEJA	738.328		738.324	5.73583	ND
GM-AEJV	969.443		969.433	11.1201	ND
GM-AEJK (Anhydro)	978.444		978.435	9.59747	ND
GM-AEJSA (Deacetyl-Anhydro)	966.408		966.399	9.20208	ND
M-AEJMA	869.373		869.382	-10.2136	ND
GM-AEJFA	1088.48		1088.47	10.0307	ND
GM-AEJSD (Anhydro)	1052.41		1052.38	22.2641	ND
GM-AEJGV (Anhydro)	1006.43		1006.45	-10.9179	ND
GM-AE (Amidated)	697.302		697.299	4.07884	ND
GM-AEJH	1007.43		1007.42	10.6505	ND
GM-AEJH	1007.43		1007.43	7.06424	ND
GM-AEJH (Amidated)	1006.45		1006.45	3.5787	ND
GM-AEJGG (Deacetyl)	942.403		942.387	17.4531	ND
GM-AEJGM (Deacetyl)	1016.42		1016.42	2.85037	ND
GM-AEJD	985.402		985.393	9.24957	ND
GM-AEJDE	1113.5		1113.49	4.30934	ND
GM-AEJDG	1042.42		1042.42	7.79668	ND
GM-AEJFA	1088.48		1088.48	4.93446	ND
M-AEJK	795.391		795.383	10.446	ND
M-AEJMA	869.373		869.386	-15.3137	ND
M-AEJ	667.291		667.286	7.27944	ND
GM-AEJYT	1134.48		1134.46	22.1714	ND
GM-AEJT	971.423		971.415	8.68654	ND
GM-AEJMA (Deacetyl)	1030.44		1030.44	4.56301	ND
GM-GM-AEJF	1495.64		1495.61	20.1821	ND
GM-AEJKA	1069.51		1069.5	6.15139	ND
GM-AEJSA	1028.44		1028.43	13.989	ND
M-AEJDN	896.366		896.364	1.84061	ND
GM-AEJGG	984.413		984.41	3.34672	ND
GM-GM-AEJYT	1042.42		1042.43	-2.4802	ND
GM-AEJKA	1069.51		1069.5	8.391	ND
GM-AEJEE	1127.51		1127.5	7.51907	ND
M-AEJTC	871.353		871.35	3.52688	ND
GM-AEJFG	1074.46		1074.45	15.5257	ND
GM-AEJS (Amidated)	956.423		956.413	10.8028	ND
GM-AEJAA (Anhydro)	992.419		992.417	2.09402	ND
GM-AEJA (Deacetyl)	899.397		899.395	2.34612	ND
GM-AEJFS	1104.48		1104.46	10.7792	ND
GM-AEJDE	2960.31		2960.27	11.2083	ND
GM-AEJSA	1028.44		1028.42	19.1052	ND
GM-AEJD (Deacetyl-Anhydro)	923.365		923.385	-21.4598	ND
GM-AEJSD (Deacetyl)	1030.42		1030.44	-14.2534	ND
M-AEJ-GM-AEJI	1632.74		1632.74	0.0309567	ND
GM-AEJG (Deacetyl)	885.381		885.389	-8.20709	ND
GM-AEJDE	1113.5		1113.49	2.60916	ND
GM-AEJMA (Deacetyl)	1030.44		1030.44	3.54936	ND
GM-AEJIN	1097.5		1097.49	8.69932	ND
GM-AEJEE	1127.51		1127.51	6.33233	ND
GM-AEJA (Amidated)	940.424		940.422	1.70241	ND
GM-AEJF (Deacetyl-Anhydro)	955.407		955.421	-14.8566	ND
GM-AEJEA	1070.46		1070.48	-23.6351	ND
GM-AEJRH	1163.53		1163.52	11.3722	ND
GM-AEJGP	1024.44		1024.46	-14.4186	ND
GM-AEJE	999.418		999.442	-24.1936	ND
GM-AEJWT	1157.5		1157.48	21.3336	ND
GM-GM-AEJKR	1632.76		1632.74	14.3511	ND
GM-AEJIW	1169.54		1169.51	22.5297	ND
GM-AEJKR (Deacetyl-Anhydro)	1092.53		1092.53	2.46657	ND
GM-GM-AEJG	1405.59		1405.56	18.2822	ND
GM-AEJC (Deacetyl)	931.374		931.393	-21.14	ND
GM-AEJIS	1070.49		1070.48	7.30967	ND
GM-AEJDG	1042.42		1042.42	-0.616297	ND
GM-GM-AEJDA	1534.64		1534.67	-19.2541	ND
GM-AEJGV	2236.97		2236.96	5.22085	ND
GM-AEJKA	1069.51		1069.5	10.6772	ND
GM-AEJNG (Deacetyl)	999.429		999.445	-16.1262	ND
GM-AEJWC	1159.46		1159.44	24.9216	ND
GM-AEJS	957.407		957.403	4.65111	ND
GM-AEJS (Deacetyl-Anhydro)	895.37		895.356	16.1929	ND
GM-AEJG (Deacetyl)	885.381		885.392	-11.6042	ND
GM-AEJ (Deacetyl)	828.36		828.358	1.95988	ND
GM-AEJDN	1099.45		1099.46	-13.4047	ND
GM-GM-AEJW	1534.65		1534.68	-15.4656	ND
GM-AEJTA (Deacetyl-Anhydro)	980.424		980.448	-24.4926	ND
GM-GM-AEJIA	1532.69		1532.67	18.4006	ND
GM-AEJTC (Anhydro)	1054.41		1054.39	17.3706	ND
GM-AEJDG	1042.42		1042.41	8.91939	ND
GM-AEJNG	1041.44		1041.46	-21.9651	ND
GM-AEJTA	1042.46		1042.47	-6.6913	ND
GM-AEJG (Anhydro)	907.366		907.379	-15.006	ND
GM-AEJF (Anhydro)	997.417		997.393	24.0433	ND
GM-AEJKR (Deacetyl-Anhydro)	1092.53		1092.52	9.53868	ND
GM-AEJSD	1072.43		1072.42	9.8315	ND
GM-AEJWA	1127.49		1127.48	12.2234	ND
GM-AEJ-GM-AE	1550.65		1550.63	12.087	ND
GM-AEJGP (Amidated)	1023.46		1023.44	18.0701	ND
GM-AEJC (Amidated)	972.4		972.411	-10.5068	ND
GM-AEJDA	1056.44		1056.43	12.3743	ND
M-AEJW	853.376		853.397	-24.4663	ND
GM-AEJED	1114.45		1114.47	-21.3398	ND
GM-AEJK (Deacetyl)	956.46		956.455	4.54347	ND
GM-AEJDG (Deacetyl-Anhydro)	1802.77		1802.77	0.609246	ND
GM-AEJGM	1058.43		1058.44	-9.91701	ND
GM-AEJS	957.407		957.393	14.6099	ND
GM-AEJGP (Deacetyl-Anhydro)	962.408		962.408	-0.451782	ND
GM-AEJIS (Deacetyl-Anhydro)	1008.45		1008.45	7.06575	ND
GM-AEJA-GM-AEJWW (Amidated)	2164.95		2164.99	-18.6548	ND
GM-GM-AEJK	1476.67		1476.64	17.5859	ND
GM-AEJA-GM-AEJKW	2107.95		2107.92	14.0059	ND
GM-GM-AEJK	1476.67		1476.64	18.9232	ND
GM-AEJA-GM-AEJD (Deacetyl)	1866.79		1866.75	19.6037	ND
GM-AEJA-GM-AEJM (Deacetyl)	1882.8		1882.76	24.7181	ND
M-AEJA-GM-AEJMA	1792.77		1792.78	-4.09852	ND
GM-AEJA-GM-AEJDA (Deacetyl-Anhydro)	1917.8		1917.79	5.0862	ND
GM-AEJA-GM-AEJH	1930.83		1930.82	5.15779	ND
GM-AEJ-GM-AEJG (Deacetyl)	1737.74		1737.75	-4.05032	ND
GM-AEJA-GM-AEJG (Anhydro)	1830.76		1830.79	-15.6178	ND
GM-AEJA-GM-AEJM	1924.81		1924.8	6.73641	ND
GM-AEJA-GM-AEJM	1924.81		1924.8	6.20491	ND
M-AEJA-GM-AEJSD	1792.75		1792.77	-12.1061	ND
M-AEJA-GM-AEJMA	1792.77		1792.77	-0.167455	ND
GM-AEJA-GM-AEJM	1924.81		1924.8	8.911	ND
GM-AEJA-GM-AEJMA	1995.85		1995.83	10.6312	ND
GM-AEJ-GM-AEJG (Deacetyl)	1737.74		1737.75	-4.34383	ND
GM-AEJA-GM-AEJH	1930.83		1930.81	8.6663	ND
GM-AEJA-GM-AEJAA	1935.84		1935.83	6.30852	ND
GM-AEJA-GM-AEJC	1896.78		1896.77	7.56119	ND
GM-AEJ-GM-AEJDG (Deacetyl)	1852.77		1852.76	9.4971	ND
GM-AEJ-GM-AEJDG (Deacetyl)	1852.77		1852.76	8.40606	ND
GM-AEJA-GM-AEJF (Anhydro)	1920.81		1920.8	5.86071	ND
GM-AEJA-GM-AEJDE	2036.89		2036.88	7.2175	ND
GM-AEJ-GM-AEJV	1821.8		1821.79	6.38202	ND
GM-AEJA-GM-AEJDA (Deacetyl-Anhydro)	1917.8		1917.78	8.51757	ND
GM-AEJA-GM-AEJF (Anhydro)	1920.81		1920.8	7.97996	ND
GM-AEJA-GM-AEJH	1930.83		1930.82	3.83026	ND
GM-AEJA-GM-AEJDE	2036.89		2036.88	6.88592	ND
GM-AEJ-GM-AEJSD (Deacetyl)	1882.78		1882.75	15.766	ND
GM-AEJA-GM-AEJK (Double Anhydro)	1881.81		1881.79	15.0743	ND
GM-AEJA-GM-AEJKW (Anhydro)	2087.92		2087.89	15.6046	ND
GM-AEJ-GM-AEJG	1779.75		1779.74	5.2222	ND
GM-AEJA-GM-AEJTT (Amidase Product)	1515.67		1515.7	-17.3308	ND
GM-GM-AEJA-GM-AEJK	2400.07		2400.03	13.3945	ND
GM-AEJA-GM-AEJSD	1995.83		1995.84	-4.80484	ND
GM-AEJA-GM-AEJM (Deacetyl-Anhydro)	1862.78		1862.78	-3.81563	ND
GM-AEJA-GM-AEJD (Deacetyl-Anhydro)	1846.76		1846.78	-11.435	ND
GM-AEJA-GM-AEJMA	1995.85		1995.83	11.2605	ND
GM-AEJA-GM-AEJYT	2057.88		2057.93	-22.2643	ND
GM-AEJA-GM-AEJK (Double Anhydro)	1881.81		1881.8	9.24946	ND
GM-AEJ-GM-AEJF	1869.8		1869.79	6.35235	ND
GM-AEJA-GM-AEJAA	2006.93		2006.92	3.56804	ND
GM-AEJA-GM-AEJKR (Anhydro)	2057.94		2057.93	4.71036	ND
GM-AEJ-GM-AEJKR	2006.93		2006.92	4.34769	ND
GM-AEJ-GM-AEJTT (Anhydro)	2006.93		2006.92	4.34769	ND
GM-AEJ-GM-AEJY (Double Anhydro)	1845.74		1845.78	-19.7116	ND
GM-AEJ-GM-AEJKR	2006.93		2006.92	4.81668	ND
GM-AEJA-GM-AEJMA (Amidase Product)	1515.65		1515.69	-23.8724	ND
GM-AEJA-GM-AEJKA	1992.9		1992.89	7.56721	ND
GM-AEJA-GM-AEJV	1892.84		1892.82	8.43091	ND
GM-AEJA-GM-AEJD	1908.8		1908.78	7.69559	ND
GM-AEJA-GM-AEJGG	1907.81		1907.8	5.28224	ND
GM-AEJA-GM-AEJKA	1992.9		1992.89	7.91184	ND
GM-GM-AEJA-GM-AEJK	2400.07		2400.03	15.6735	ND
GM-AEJA-GM-AEJLG	1963.88		1963.86	7.62501	ND
GM-AEJWW	1242.53		1242.53	5.93675	ND
GM-AEJ-GM-AEJT	1823.78		1823.74	21.456	ND
GM-AEJA-GM-AEJAA (Anhydro)	1915.82		1915.81	3.13034	ND
GM-AEJA-GM-AEJM (Anhydro)	3031.34		3031.31	12.0182	ND
GM-AEJA-GM-AEJM (Deacetyl-Anhydro)	1862.78		1862.79	-8.09438	ND
GM-AEJA-GM-AEJY (Anhydro)	1936.81		1936.8	2.01222	ND
GM-AEJ-GM-AEJA-GM-AE	2474.04		2474.02	9.87405	ND
GM-AEJA-GM-AE	1621.68		1621.67	10.3546	ND
GM-AEJA-GM-AEJD (Deacetyl-Anhydro)	1846.76		1846.73	16.8467	ND
GM-AEJA-GM-AEJG (Anhydro)	1830.76		1830.75	6.045	ND
GM-AEJ-GM-AEJG (Deacetyl-Anhydro)	1717.71		1717.72	-5.14324	ND
GM-AEJ-GM-AEJV (Amidated)	1820.82		1820.8	7.99518	ND
GM-AEJA-GM-AEJH (Amidated)	1929.85		1929.84	5.07322	ND
M-AEJA-GM-AEJDG	1762.74		1762.71	16.9044	ND
GM-AEJ-GM-AEJM (Double Anhydro)	1813.72		1813.74	-8.80985	ND
GM-AEJ-GM-AEJV (Double Anhydro)	1781.75		1781.72	17.2836	ND
GM-AEJ-GM-AEJI	1835.82		1835.81	6.37408	ND
GM-AEJA-GM-AEJDA	1979.84		1979.83	1.47432	ND
GM-AEJA-GM-AEJAA	1935.84		1935.83	3.84179	ND
M-AEJA-GM-AEJM	1721.73		1721.74	-4.97233	ND
GM-AEJA-GM-AEJM (Double Anhydro)	1884.76		1884.8	-23.7718	ND
GM-AEJA-GM-AEJDE (Anhydro)	2016.87		2016.85	7.28707	ND
GM-AEJA-GM-AEJY (Anhydro)	1936.81		1936.8	1.81873	ND
GM-AEJA-GM-AEJDA	1979.84		1979.84	-1.14533	ND
GM-AEJ-GM-AEJY	1885.8		1885.79	4.41463	ND
GM-GM-AEJA-GM-AEJG	2328.99		2329	-5.98884	ND
GM-AEJ-GM-AEJA-GM-AE	2474.04		2474.02	9.6465	ND
GM-AEJA-GM-AEJM (Anhydro)	1904.79		1904.76	11.301	ND
GM-AEJA-GM-AEJFA	2011.88		2011.86	7.37476	ND
GM-AEJA-GM-AEJFA	2011.88		2011.86	6.65919	ND
GM-AEJA-GM-AEJ (Deacetyl)	1751.76		1751.74	8.25177	ND
GM-AEJA-GM-AEJFA	2011.88		2011.85	14.5347	ND
GM-AEJ-GM-AEJY (Amidated)	1884.81		1884.82	-5.03646	ND
GM-AEJA-GM-AEJAA (Anhydro)	1915.82		1915.8	6.96997	ND
M-AEJA-GM-AEJM	1915.82		1915.8	6.12142	ND
GM-AEJA-GM-AEJK (Amidase Product)	1441.67		1441.64	22.8529	ND
GM-AEJ-GM-AEJSD (Deacetyl-Anhydro)	1862.76		1862.73	15.8479	ND
GM-AEJA-GM-AEJT	1894.82		1894.8	8.36537	ND
GM-AEJA-GM-AEJMA (Anhydro)	1975.82		1975.78	23.0906	ND
GM-AEJA-GM-AEJT	1894.82		1894.81	2.8475	ND
GM-AEJA-GM-AEJT	1894.82		1894.8	9.92429	ND
GM-AEJA-GM-AEJDA (Amidase Product)	1499.64		1499.62	12.3657	ND
GM-GM-AEJA-GM-AEJIA	2456.09		2456.05	15.2237	ND
GM-AEJ-GM-AEJM	1853.78		1853.76	7.54348	ND
GM-AEJ-GM-AEJDG (Deacetyl-Anhydro)	1832.75		1832.73	9.60721	ND
GM-AEJ-GM-AEJSD (Anhydro)	1904.77		1904.72	23.9216	ND
M-AEJA-GM-AEJM	940.424		940.422	2.05302	ND
GM-GM-AEJA-GM-AEJKW	2586.14		2586.11	14.5854	ND
M-AEJA-GM-AEJ	1590.69		1590.68	8.01911	ND
GM-AEJ-GM-AEJA-GM-AE	2474.04		2474.02	8.35573	ND
GM-AEJ-GM-AEJSD (Amidase Product)	1444.6		1444.58	15.3137	ND
M-AEJA-GM-AEJG	1647.71		1647.67	22.5552	ND
GM-GM-AEJA-GM-AEJF	2419.04		2419.01	10.6496	ND
GM-AEJA-GM-AEJDG	1965.82		1965.81	6.54555	ND
GM-AEJ-GM-AEJM (Anhydro)	1833.75		1833.79	-23.7434	ND
GM-AEJA-GM-AEJFG	1997.86		1997.81	24.974	ND
GM-AEJ-GM-AEJG	1779.75		1779.75	-1.6065	ND
GM-AEJA-GM-AEJWW (Amidase Product)	1685.74		1685.73	1.80971	ND
GM-AEJ-GM-AEJC	1825.74		1825.73	8.85995	ND
GM-GM-AEJ-GM-AEJDG	2372.98		2372.94	16.2468	ND
M-AEJA-GM-AEJDG	1762.74		1762.7	24.2291	ND
GM-AEJA-GM-AEJKW (Amidase Product)	1627.75		1627.73	15.7299	ND
GM-AEJA-GM-AEJDA (Amidase Product)	1499.64		1499.62	16.6372	ND
GM-AEJA-GM-AEJA (Deacetyl-Anhydro)	1802.77		1802.76	2.20739	ND
GM-AEJA-GM-AEJDG	1965.82		1965.84	-9.6355	ND
GM-AEJ-GM-AEJTT (Amidase Product)	1444.64		1444.66	-18.4661	ND
GM-AEJA-GM-AEJKW (Double Anhydro)	2067.89		2067.87	13.0094	ND
GM-AEJA-GM-AEJG (Deacetyl)	1808.78		1808.78	0.0136896	ND
GM-GM-AEJA-GM-AEJI	2385.05		2385.02	15.5894	ND
GM-AEJA-GM-AEJH (Double Anhydro)	1890.78		1890.79	-5.37876	ND
GM-GM-AEJA-GM-AEJF	2419.04		2419.02	7.06196	ND
GM-AEJ-GM-AEJ-GM-AEJA	2646.13		2646.11	5.30888	ND
GM-AEJA-GM-AEJA-GM-AE	2545.08		2545.06	9.34729	ND
GM-AEJ-GM-AEJA-GM-AEJIA (Double Anhydro)	2790.2		2790.14	21.1598	ND
GM-GM-AEJ-GM-AEJ-GM-AEJA	3124.33		3124.39	-21.6588	ND
GM-AEJ-GM-AEJA-GM-AEJAA (Amidase Product)	2308.01		2307.99	6.25624	ND
GM-AEJA-GM-AEJA-GM-AEJKW	3031.34		3031.31	12.5756	ND
GM-AEJ-GM-AEJA-GM-AEJKA (Double Anhydro)	2805.21		2805.19	7.57236	ND
GM-AEJ-GM-AEJ-GM-AEJA (Anhydro)	2626.1		2626.08	6.92767	ND
GM-AEJ-GM-AEJ-GM-AEJAA (Amidase Product)	2236.97		2236.96	2.98301	ND
GM-AEJA-GM-AEJA-GM-AEJKW (Anhydro)	3011.32		3011.28	13.3607	ND
GM-AEJ-GM-AEJA-GM-AEJKW	2960.31		2960.27	11.2083	ND
GM-AEJ-GM-AEJA-GM-AEJKA	2845.26		2845.24	7.75652	ND
GM-AEJA-GM-AEJA-GM-AEJYT	2981.28		2981.33	-18.1404	ND
GM-AEJA-GM-AEJA-GM-AEJIA	2901.29		2901.27	7.51736	ND
GM-AEJA-GM-AEJWW	2165.93		2165.92	6.27118	ND
GM-AEJ-GM-AEJA-GM-AEJIA	2830.25		2830.23	9.35343	ND
GM-AEJ-GM-AEJ-GM-AEJFA	2793.2		2793.19	5.11943	ND
