# Supplementary material for: PGFinder, a novel analysis pipeline for the consistent, reproducible, and high-resolution structural analysis of bacterial peptidoglycans
Source: eLife. 2021 Sep 28;10:e70597. doi: 10.7554/eLife.70597 (PMC8478412; doi:10.7554/eLife.70597)
Supplement: Table 2—source data 2. [file elife-70597-table2-data2.xlsx]

## Sheet: Table 2 - supplement 4
Raw Analysis output									Consolidated Data
ID	rt	Retention length	mwMonoisotopic	theo_mwMonoisotopic	inferredStructure	maxIntensity			Theoretical Masses	InferredStructure	maxIntensity
729	12.703	51.104	478.186	478.18	GM (Anhydro) |0	14059			478.18	GM (Anhydro) |0	162111
728	12.78	50.018	478.169	478.18	GM (Anhydro) |0	11631			956.36	GM (x2) (Anhydro) |0	103315
491	10.641	58.146	478.168	478.18	GM (Anhydro) |0	19633			934.375	GM (x2) (Deacetyl) |0	51805.7
250	8.075	49.546	478.183	478.18	GM (Anhydro) |0	20248			914.349	GM (x2) (Deacetyl-Anhydro) |0	9990
249	8.11	49.546	478.175	478.18	GM (Anhydro) |0	24814			976.386	GM (x2)|0	197338
248	8.11	43.686	478.169	478.18	GM (Anhydro) |0	11576			976.3860,976.4286,976.4039	GM (x2)|0,GM-AEJPA (Deacetyl-Anhydro) |1,GM-GM|0	21648
363	9.282	84.353	478.183	478.18	GM (Anhydro) |0	37687			976.3860,976.4039	GM (x2)|0,GM-GM|0	237106
365	9.295	76.573	478.19	478.18	GM (Anhydro) |0	22463			1434.54	GM (x3) (Anhydro) |0	33938.4
1750	12.605	50.018	956.352	956.36	GM (x2) (Anhydro) |0	18526			1412.56	GM (x3) (Deacetyl) |0	40458.2
726	12.782	75.935	956.349	956.36	GM (x2) (Anhydro) |0	24343			1454.57	GM (x3)|0	89578.9
488	10.613	68.517	956.349	956.36	GM (x2) (Anhydro) |0	36260			1454.5659,1454.5838	GM (x3)|0,GM-GM (x2)|0	215405
1749	12.571	45.384	956.342	956.36	GM (x2) (Anhydro) |0	11158			1890.74	GM (x4) (Deacetyl) |0	17488.6
1159	10.618	31.128	956.341	956.36	GM (x2) (Anhydro) |0	4666.7			1932.75	GM (x4)|0	8919.7
1160	10.585	39.293	956.352	956.36	GM (x2) (Anhydro) |0	8361.5			1932.7458,1932.7637	GM (x4)|0,GM-GM (x3)|0	29660.1
1752	12.571	47.304	956.373	956.3598,956.3852	GM (x2) (Anhydro) |0,M-AEJWC|1	10186			976.4286,976.4039	GM-AEJPA (Deacetyl-Anhydro) |1,GM-GM|0	41896.6
1751	12.571	47.304	956.362	956.3598,956.3852	GM (x2) (Anhydro) |0,M-AEJWC|1	16468			1454.58	GM-GM (x2)|0	20914
727	12.745	68.254	956.364	956.3598,956.3852	GM (x2) (Anhydro) |0,M-AEJWC|1	20708			498.206	GM|0	46438
489	10.561	72.822	956.364	956.3598,956.3852	GM (x2) (Anhydro) |0,M-AEJWC|1	31124			520.188	Na+ GM|0	45192
1753	12.718	42.097	956.384	956.3598,956.3852	GM (x2) (Anhydro) |0,M-AEJWC|1	6655.8			956.3598,956.3852	GM (x2) (Anhydro) |0,M-AEJWC|1	111132
490	10.56	56.416	956.379	956.3598,956.3852	GM (x2) (Anhydro) |0,M-AEJWC|1	18629			697.302	GM-AE (Amidated) |1	4313.1
1161	10.604	37.601	956.362	956.3598,956.3852	GM (x2) (Anhydro) |0,M-AEJWC|1	7361.2			678.26	GM-AE (Anhydro) |1	46540.1
948	4.384	48.712	934.379	934.375	GM (x2) (Deacetyl) |0	11150			850.344	GM-AEJ (Anhydro) |1	121320
947	4.459	50.831	934.368	934.375	GM (x2) (Deacetyl) |0	11473			921.381	GM-AEJA (Anhydro) |1	45831
949	4.384	43.691	934.389	934.375	GM (x2) (Deacetyl) |0	9237.4			1012.44	GM-AEJAA|1	13005.9
107	4.546	57.943	934.372	934.375	GM (x2) (Deacetyl) |0	7719.5			1012.4448,1012.4859,1012.4496	GM-AEJAA|1,GM-AEJIA (Deacetyl) |1,GM-AEJSP (Deacetyl) |1	8582.4
946	4.565	39.541	934.358	934.375	GM (x2) (Deacetyl) |0	6608.5			1012.4448,1012.4496	GM-AEJAA|1,GM-AEJSP (Deacetyl) |1	76285.1
106	4.573	43.48	934.387	934.375	GM (x2) (Deacetyl) |0	5617.3			941.408	GM-AEJA|1	1.84741e+06
74	4.076	21.429	914.349	914.349	GM (x2) (Deacetyl-Anhydro) |0	4625.4			941.4077,941.4488,941.4488	GM-AEJA|1,GM-AEJI (Deacetyl) |1,GM-AEJL (Deacetyl) |1	294911
1275	10.993	35.068	914.346	914.349	GM (x2) (Deacetyl-Anhydro) |0	5364.6			973.384	GM-AEJC|1	28240
1183	10.564	39.293	976.372	976.386	GM (x2)|0	21309.7			1056.4394,1056.4398,1056.4553	GM-AEJDA|1,GM-AEJEG|1,GM-AEJW|1	7541
1013	8.124	55.96	976.362	976.386	GM (x2)|0	17532			1056.4394,1056.4398,1056.4553,1056.4753	GM-AEJDA|1,GM-AEJEG|1,GM-AEJW|1,GM-AEJVS|1	7181.5
1017	8.11	66.256	976.371	976.386	GM (x2)|0	55136			1145.5	GM-AEJFQ|1	3090.6
237	8.075	66.015	976.364	976.386	GM (x2)|0	23998			1017.44	GM-AEJF|1	347107
234	8.079	76.127	976.378	976.386	GM (x2)|0	79362.6			978.403	GM-AEJGA (Anhydro) |1	4261
236	8.079	66.015	976.408	976.3860,976.4286,976.4039	GM (x2)|0,GM-AEJPA (Deacetyl-Anhydro) |1,GM-GM|0	21648			998.429	GM-AEJGA|1	190203
1012	8.112	67.917	976.381	976.3860,976.4039	GM (x2)|0,GM-GM|0	71976			998.4292,998.4703,998.4703,998.4699	GM-AEJGA|1,GM-AEJK|1,GM-AEJLG (Deacetyl) |1,GM-AEJVA (Deacetyl) |1	538318
1014	8.11	67.917	976.392	976.3860,976.4039	GM (x2)|0,GM-GM|0	54492			983.429	GM-AEJGG (Amidated) |1	8575.5
1015	8.114	62.564	976.403	976.3860,976.4039	GM (x2)|0,GM-GM|0	32950			984.413	GM-AEJGG|1	4287.9
235	8.079	76.127	976.393	976.3860,976.4039	GM (x2)|0,GM-GM|0	35588			927.392	GM-AEJG|1	92596.8
1186	10.589	39.293	976.392	976.3860,976.4039	GM (x2)|0,GM-GM|0	13965			963.4331,963.4331	GM-AEJI (Anhydro) |1,GM-AEJL (Anhydro) |1	6707.9
1187	10.544	37.601	976.403	976.3860,976.4039	GM (x2)|0,GM-GM|0	8501.5			941.4488,941.4488	GM-AEJI (Deacetyl) |1,GM-AEJL (Deacetyl) |1	347685
1184	10.587	39.293	976.382	976.3860,976.4039	GM (x2)|0,GM-GM|0	19634			921.4225,921.4225	GM-AEJI (Deacetyl-Anhydro) |1,GM-AEJL (Deacetyl-Anhydro) |1	8813.1
813	13.985	39.036	1434.55	1434.54	GM (x3) (Anhydro) |0	9344.2			1054.5	GM-AEJIA|1	56306.1
812	13.89	39.036	1434.53	1434.54	GM (x3) (Anhydro) |0	11903			1054.4964,1054.4601	GM-AEJIA|1,GM-AEJSP|1	44794.4
841	13.92	39.036	1434.51	1434.54	GM (x3) (Anhydro) |0	7063.7			983.4593,983.4593	GM-AEJI|1,GM-AEJL|1	89101.9
825	13.985	30.944	1434.57	1434.54	GM (x3) (Anhydro) |0	5627.5			983.4593,983.4593,983.4295	GM-AEJI|1,GM-AEJL|1,GM-AEJGG (Amidated) |1	86124
379	9.286	65.869	1412.55	1412.56	GM (x3) (Deacetyl) |0	14058			978.4441,978.444,978.4436	GM-AEJK (Anhydro) |1,GM-AEJLG (Deacetyl-Anhydro) |1,GM-AEJVA (Deacetyl-Anhydro) |1	45911.9
380	9.221	57.811	1412.56	1412.56	GM (x3) (Deacetyl) |0	11221			1154.5667,1154.5702	GM-AEJKR|1,GM-AEJRE|1	74102
381	9.3	46.275	1412.53	1412.56	GM (x3) (Deacetyl) |0	8528.6			1154.5667,1154.5702,1154.5339	GM-AEJKR|1,GM-AEJRE|1,GM-AEJRQ|1	82823.9
382	9.211	29.617	1412.58	1412.56	GM (x3) (Deacetyl) |0	6650.6			1154.5667,1154.5339	GM-AEJKR|1,GM-AEJRQ|1	13402
508	10.643	44.819	1454.54	1454.57	GM (x3)|0	74608.9			1184.5496,1184.5136,1184.5502	GM-AEJKW|1,GM-AEJQW|1,GM-AEJWE|1	35847.5
1165	10.687	35.927	1454.54	1454.57	GM (x3)|0	14970			1184.5496,1184.5502	GM-AEJKW|1,GM-AEJWE|1	7910
509	10.646	48.463	1454.56	1454.5659,1454.5838	GM (x3)|0,GM-GM (x2)|0	75167			998.4703,998.4703,998.4699	GM-AEJK|1,GM-AEJLG (Deacetyl) |1,GM-AEJVA (Deacetyl) |1	1.22346e+06
1164	10.568	31.128	1454.6	1454.5659,1454.5838	GM (x3)|0,GM-GM (x2)|0	5755.2			1040.4808,1040.4804	GM-AEJLG|1,GM-AEJVA|1	43962.3
1189	10.643	37.601	1454.57	1454.5659,1454.5838	GM (x3)|0,GM-GM (x2)|0	16054			1072.4524,1072.4342,1072.4525	GM-AEJMA|1,GM-AEJSD|1,GM-AEJVC|1	32127
1199	10.628	35.78	1454.58	1454.5659,1454.5838	GM (x3)|0,GM-GM (x2)|0	10510			1072.4524,1072.4342,1072.4525,1072.471	GM-AEJMA|1,GM-AEJSD|1,GM-AEJVC|1,GM-AEJTT|1	38878.9
1200	10.677	41.189	1454.56	1454.5659,1454.5838	GM (x3)|0,GM-GM (x2)|0	18506			1072.4524,1072.4525,1072.471	GM-AEJMA|1,GM-AEJVC|1,GM-AEJTT|1	10387
510	10.586	46.578	1454.58	1454.5659,1454.5838	GM (x3)|0,GM-GM (x2)|0	55648			1001.42	GM-AEJM|1	79158.5
511	10.585	42.881	1454.6	1454.5659,1454.5838	GM (x3)|0,GM-GM (x2)|0	33765			976.429	GM-AEJPA (Deacetyl-Anhydro) |1	7188.6
1158	10.568	33.694	1890.73	1890.74	GM (x4) (Deacetyl) |0	7187.2			1038.47	GM-AEJPA|1	61518.8
1150	10.58	26.755	1890.71	1890.74	GM (x4) (Deacetyl) |0	4781.4			1184.51	GM-AEJQW|1	15360.6
1142	10.568	16.8	1890.75	1890.74	GM (x4) (Deacetyl) |0	5520			1052.41	GM-AEJSD (Anhydro) |1	7016.2
1471	11.787	26.222	1932.71	1932.75	GM (x4)|0	8919.7			1072.43	GM-AEJSD|1	12734.4
1486	11.74	18.064	1932.78	1932.7458,1932.7637	GM (x4)|0,GM-GM (x3)|0	6171.1			1054.46	GM-AEJSP|1	6714.5
1473	11.779	26.222	1932.76	1932.7458,1932.7637	GM (x4)|0,GM-GM (x3)|0	10077			1072.47	GM-AEJTT|1	6660.2
1472	11.755	30.164	1932.74	1932.7458,1932.7637	GM (x4)|0,GM-GM (x3)|0	13412			949.417	GM-AEJV (Anhydro) |1	13128.7
113	4.986	22.298	697.291	697.302	GM-AE (Amidated) |1	4313.1			927.433	GM-AEJV (Deacetyl) |1	6521.4
839	14.201	44.178	678.263	678.26	GM-AE (Anhydro) |1	12640			969.443	GM-AEJV|1	22856.7
838	14.14	42.347	678.248	678.26	GM-AE (Anhydro) |1	10637			1159.46	GM-AEJWC|1	43092
840	14.204	40.277	678.272	678.26	GM-AE (Anhydro) |1	8063.1			1241.55	GM-AEJWW (Amidated) |1	281722
837	14.185	46.226	678.253	678.26	GM-AE (Anhydro) |1	15200			1013.41	GM-AEJY (Anhydro) |1	10911
1460	11.684	39.669	850.349	850.344	GM-AEJ (Anhydro) |1	31917			1033.44	GM-AEJY|1	125421
1462	11.731	41.311	850.329	850.344	GM-AEJ (Anhydro) |1	28602			870.371	GM-AEJ|1	4.79819e+06
1459	11.666	41.311	850.339	850.344	GM-AEJ (Anhydro) |1	41490			698.286	GM-AE|1	443036
1461	11.672	37.599	850.359	850.344	GM-AEJ (Anhydro) |1	19311			1419.61	GM-GM-AEJA|1	513104
1102	9.151	34.99	1348.52	1348.55	GM-AEJ-GM (x2) (Amidase Product) |2	24293			1623.7	GM-GM-AEJFQ|1	17414.1
346	9.203	48.267	1348.53	1348.55	GM-AEJ-GM (x2) (Amidase Product) |2	124960			1476.67	GM-GM-AEJK|1	53589.6
1854	13.222	5.154	1828.78	1828.7458,1828.7884	GM-AEJ-GM (x2)|2,GM-AEJ-GM-AEJPA (Deacetyl-Anhydro) |2	4189.4			1348.57	GM-GM-AEJ|1	83061
2016	13.813	34.458	1702.7	1702.7	GM-AEJ-GM-AEJ (Anhydro) |2	9129			1176.48	GM-GM-AE|1	18762.4
2017	13.76	34.458	1702.68	1702.7	GM-AEJ-GM-AEJ (Anhydro) |2	8536.8			781.334	M-AEJGG|1	170422
1705	12.517	17.507	1702.74	1702.7	GM-AEJ-GM-AEJ (Anhydro) |2	5204.3			949.374	Na+ GM-AEJG|1	22911
1746	12.517	46.609	1702.72	1702.7	GM-AEJ-GM-AEJ (Anhydro) |2	8479.5			1348.55	GM-AEJ-GM (x2) (Amidase Product) |2	149253
1747	12.544	52.667	1702.7	1702.7	GM-AEJ-GM-AEJ (Anhydro) |2	11066			1828.7458,1828.7884	GM-AEJ-GM (x2)|2,GM-AEJ-GM-AEJPA (Deacetyl-Anhydro) |2	4189.4
1748	12.533	50.796	1702.68	1702.7	GM-AEJ-GM-AEJ (Anhydro) |2	11069			1702.7	GM-AEJ-GM-AEJ (Anhydro) |2	59380.6
2014	13.792	28.165	1702.72	1702.7	GM-AEJ-GM-AEJ (Anhydro) |2	5896			1866.7887,1866.7891,1866.7675	GM-AEJ-GM-AEJDA (Deacetyl) |2,GM-AEJ-GM-AEJEG (Deacetyl) |2,GM-AEJ-GM-AEJSP (Double Anhydro) |2	19905.7
1011	8.151	13.873	3159.36	3159.29	GM-AEJ-GM-AEJ-GM (x3)|3	9954.2			1866.7887,1866.7891,1866.8046,1866.8246,1866.8038,1866.8038,1866.8038	GM-AEJ-GM-AEJDA (Deacetyl) |2,GM-AEJ-GM-AEJEG (Deacetyl) |2,GM-AEJ-GM-AEJW (Deacetyl) |2,GM-AEJ-GM-AEJVS (Deacetyl) |2,GM-AEJA-GM-AEJI (Double Anhydro) |2,GM-AEJA-GM-AEJL (Double Anhydro) |2,GM-AEJ-GM-AEJIA (Double Anhydro) |2	97750.1
1741	12.533	15.679	2645.18	2645.1433,2645.1433	GM-AEJ-GM-AEJ-GM-AEJA (Amidated) |3,GM-AEJ-GM-AEJA-GM-AEJ (Amidated) |3	4983.6			1866.7887,1866.7891,1866.8046,1866.8038,1866.8038,1866.8038,1866.7675	GM-AEJ-GM-AEJDA (Deacetyl) |2,GM-AEJ-GM-AEJEG (Deacetyl) |2,GM-AEJ-GM-AEJW (Deacetyl) |2,GM-AEJA-GM-AEJI (Double Anhydro) |2,GM-AEJA-GM-AEJL (Double Anhydro) |2,GM-AEJ-GM-AEJIA (Double Anhydro) |2,GM-AEJ-GM-AEJSP (Double Anhydro) |2	82818
2182	14.64	23.423	2626.07	2626.1011,2626.1011	GM-AEJ-GM-AEJ-GM-AEJA (Anhydro) |3,GM-AEJ-GM-AEJA-GM-AEJ (Anhydro) |3	6438.7			1846.7624,1846.7628	GM-AEJ-GM-AEJDA (Deacetyl-Anhydro) |2,GM-AEJ-GM-AEJEG (Deacetyl-Anhydro) |2	5871.5
2158	14.646	24.77	2626.1	2626.1011,2626.1011	GM-AEJ-GM-AEJ-GM-AEJA (Anhydro) |3,GM-AEJ-GM-AEJA-GM-AEJ (Anhydro) |3	5536.5			1846.7624,1846.7628,1846.7783	GM-AEJ-GM-AEJDA (Deacetyl-Anhydro) |2,GM-AEJ-GM-AEJEG (Deacetyl-Anhydro) |2,GM-AEJ-GM-AEJW (Deacetyl-Anhydro) |2	5173.3
760	13.091	15.101	2716.24	2716.1804,2716.1804,2716.1804	GM-AEJ-GM-AEJ-GM-AEJAA (Amidated) |3,GM-AEJ-GM-AEJA-GM-AEJA (Amidated) |3,GM-AEJA-GM-AEJA-GM-AEJ (Amidated) |3	6661.1			1846.7624,1846.7628,1846.7783,1846.7983	GM-AEJ-GM-AEJDA (Deacetyl-Anhydro) |2,GM-AEJ-GM-AEJEG (Deacetyl-Anhydro) |2,GM-AEJ-GM-AEJW (Deacetyl-Anhydro) |2,GM-AEJ-GM-AEJVS (Deacetyl-Anhydro) |2	20200.8
2061	14.129	14.436	2697.13	2697.1382,2697.1382,2697.1382	GM-AEJ-GM-AEJ-GM-AEJAA (Anhydro) |3,GM-AEJ-GM-AEJA-GM-AEJA (Anhydro) |3,GM-AEJA-GM-AEJA-GM-AEJ (Anhydro) |3	5090.7			1908.7992,1908.7996	GM-AEJ-GM-AEJDA|2,GM-AEJ-GM-AEJEG|2	4853.8
2248	14.985	61.191	2697.17	2697.1382,2697.1382,2697.1382	GM-AEJ-GM-AEJ-GM-AEJAA (Anhydro) |3,GM-AEJ-GM-AEJA-GM-AEJA (Anhydro) |3,GM-AEJA-GM-AEJA-GM-AEJ (Anhydro) |3	42036			1908.7992,1908.7996,1908.8151	GM-AEJ-GM-AEJDA|2,GM-AEJ-GM-AEJEG|2,GM-AEJ-GM-AEJW|2	6557.1
2221	14.963	59.394	2697.09	2697.1382,2697.1382,2697.1382	GM-AEJ-GM-AEJ-GM-AEJAA (Anhydro) |3,GM-AEJ-GM-AEJA-GM-AEJA (Anhydro) |3,GM-AEJA-GM-AEJA-GM-AEJ (Anhydro) |3	30388			1908.7992,1908.7996,1908.8151,1908.8351	GM-AEJ-GM-AEJDA|2,GM-AEJ-GM-AEJEG|2,GM-AEJ-GM-AEJW|2,GM-AEJ-GM-AEJVS|2	5360.3
2247	14.993	64.405	2697.14	2697.1382,2697.1382,2697.1382	GM-AEJ-GM-AEJ-GM-AEJAA (Anhydro) |3,GM-AEJ-GM-AEJA-GM-AEJA (Anhydro) |3,GM-AEJA-GM-AEJA-GM-AEJ (Anhydro) |3	65309			1846.7628,1846.7783,1846.7983	GM-AEJ-GM-AEJEG (Deacetyl-Anhydro) |2,GM-AEJ-GM-AEJW (Deacetyl-Anhydro) |2,GM-AEJ-GM-AEJVS (Deacetyl-Anhydro) |2	8243
2246	14.986	102.483	2697.11	2697.1382,2697.1382,2697.1382	GM-AEJ-GM-AEJ-GM-AEJAA (Anhydro) |3,GM-AEJ-GM-AEJA-GM-AEJA (Anhydro) |3,GM-AEJA-GM-AEJA-GM-AEJ (Anhydro) |3	70709			1869.8	GM-AEJ-GM-AEJF|2	15104
2034	14.057	32.852	2697.11	2697.1382,2697.1382,2697.1382	GM-AEJ-GM-AEJ-GM-AEJAA (Anhydro) |3,GM-AEJ-GM-AEJA-GM-AEJA (Anhydro) |3,GM-AEJA-GM-AEJA-GM-AEJ (Anhydro) |3	10422			1830.8039,1830.8034,1830.8038,1830.8034	GM-AEJ-GM-AEJK (Anhydro) |2,GM-AEJA-GM-AEJV (Deacetyl-Anhydro) |2,GM-AEJ-GM-AEJLG (Deacetyl-Anhydro) |2,GM-AEJ-GM-AEJVA (Deacetyl-Anhydro) |2	9186.8
2225	14.911	51.88	2697.19	2697.1382,2697.1382,2697.1382	GM-AEJ-GM-AEJ-GM-AEJAA (Anhydro) |3,GM-AEJ-GM-AEJA-GM-AEJA (Anhydro) |3,GM-AEJA-GM-AEJA-GM-AEJ (Anhydro) |3	13157			2006.9265,2006.93	GM-AEJ-GM-AEJKR|2,GM-AEJ-GM-AEJRE|2	5790.2
2250	14.995	62.8	2697.08	2697.1382,2697.1382,2697.1382	GM-AEJ-GM-AEJ-GM-AEJAA (Anhydro) |3,GM-AEJ-GM-AEJA-GM-AEJA (Anhydro) |3,GM-AEJA-GM-AEJA-GM-AEJ (Anhydro) |3	37188			2006.9265,2006.93,2006.8937	GM-AEJ-GM-AEJKR|2,GM-AEJ-GM-AEJRE|2,GM-AEJ-GM-AEJRQ|2	13700.1
2224	14.943	55.735	2697.17	2697.1382,2697.1382,2697.1382	GM-AEJ-GM-AEJ-GM-AEJAA (Anhydro) |3,GM-AEJ-GM-AEJA-GM-AEJA (Anhydro) |3,GM-AEJA-GM-AEJA-GM-AEJ (Anhydro) |3	22472			2006.9265,2006.93,2006.8937,2006.862	GM-AEJ-GM-AEJKR|2,GM-AEJ-GM-AEJRE|2,GM-AEJ-GM-AEJRQ|2,GM-AEJA-GM-AEJFQ (Deacetyl-Anhydro) |2	14775.7
2030	14.173	34.377	2697.14	2697.1382,2697.1382,2697.1382	GM-AEJ-GM-AEJ-GM-AEJAA (Anhydro) |3,GM-AEJ-GM-AEJA-GM-AEJA (Anhydro) |3,GM-AEJA-GM-AEJA-GM-AEJ (Anhydro) |3	10501			2036.9094,2036.91	GM-AEJ-GM-AEJKW|2,GM-AEJ-GM-AEJWE|2	10096.9
2223	14.909	62.8	2697.14	2697.1382,2697.1382,2697.1382	GM-AEJ-GM-AEJ-GM-AEJAA (Anhydro) |3,GM-AEJ-GM-AEJA-GM-AEJA (Anhydro) |3,GM-AEJA-GM-AEJA-GM-AEJ (Anhydro) |3	33038			2036.9094,2036.91,2036.8734	GM-AEJ-GM-AEJKW|2,GM-AEJ-GM-AEJWE|2,GM-AEJ-GM-AEJQW|2	52739.5
2222	14.898	62.8	2697.12	2697.1382,2697.1382,2697.1382	GM-AEJ-GM-AEJ-GM-AEJAA (Anhydro) |3,GM-AEJ-GM-AEJA-GM-AEJA (Anhydro) |3,GM-AEJA-GM-AEJA-GM-AEJ (Anhydro) |3	43434			1850.8301,1850.8297,1850.8301,1850.8297	GM-AEJ-GM-AEJK|2,GM-AEJA-GM-AEJV (Deacetyl) |2,GM-AEJ-GM-AEJLG (Deacetyl) |2,GM-AEJ-GM-AEJVA (Deacetyl) |2	102360
2249	14.985	55.924	2697.2	2697.1382,2697.1382,2697.1382	GM-AEJ-GM-AEJ-GM-AEJAA (Anhydro) |3,GM-AEJ-GM-AEJA-GM-AEJA (Anhydro) |3,GM-AEJA-GM-AEJA-GM-AEJ (Anhydro) |3	25621			1890.83	GM-AEJ-GM-AEJPA|2	28449.6
2438	16.372	42.675	2677.15	2677.112,2677.112,2677.112	GM-AEJ-GM-AEJ-GM-AEJAA (Double Anhydro) |3,GM-AEJ-GM-AEJA-GM-AEJA (Double Anhydro) |3,GM-AEJA-GM-AEJA-GM-AEJ (Double Anhydro) |3	9352.9			2036.87	GM-AEJ-GM-AEJQW|2	6077.9
2424	16.371	50.885	2677.12	2677.112,2677.112,2677.112	GM-AEJ-GM-AEJ-GM-AEJAA (Double Anhydro) |3,GM-AEJ-GM-AEJA-GM-AEJA (Double Anhydro) |3,GM-AEJA-GM-AEJA-GM-AEJ (Double Anhydro) |3	15988			1882.78	GM-AEJ-GM-AEJSD (Deacetyl) |2	17862
2423	16.413	56.974	2677.1	2677.112,2677.112,2677.112	GM-AEJ-GM-AEJ-GM-AEJAA (Double Anhydro) |3,GM-AEJ-GM-AEJA-GM-AEJA (Double Anhydro) |3,GM-AEJA-GM-AEJA-GM-AEJ (Double Anhydro) |3	15824			1904.8046,1904.8312,1904.8672,1904.8678	GM-AEJ-GM-AEJTT (Anhydro) |2,M-AEJA-GM-AEJQW|2,M-AEJA-GM-AEJKW|2,M-AEJA-GM-AEJWE|2	7886.6
2422	16.396	53.026	2677.07	2677.112,2677.112,2677.112	GM-AEJ-GM-AEJ-GM-AEJAA (Double Anhydro) |3,GM-AEJ-GM-AEJA-GM-AEJA (Double Anhydro) |3,GM-AEJA-GM-AEJA-GM-AEJ (Double Anhydro) |3	10814			1882.82	GM-AEJ-GM-AEJTT (Deacetyl) |2	13161
2439	16.368	34.675	2677.18	2677.112,2677.112,2677.112	GM-AEJ-GM-AEJ-GM-AEJAA (Double Anhydro) |3,GM-AEJ-GM-AEJA-GM-AEJA (Double Anhydro) |3,GM-AEJA-GM-AEJA-GM-AEJ (Double Anhydro) |3	5756.4			1801.78	GM-AEJ-GM-AEJV (Anhydro) |2	57652.3
1848	13.015	52.89	2717.12	2717.1644,2717.1644,2717.1644	GM-AEJ-GM-AEJ-GM-AEJAA|3,GM-AEJ-GM-AEJA-GM-AEJA|3,GM-AEJA-GM-AEJA-GM-AEJ|3	64925			1866.82	GM-AEJ-GM-AEJVS (Deacetyl) |2	40183
1849	13.001	50.969	2717.22	2717.1644,2717.1644,2717.1644	GM-AEJ-GM-AEJ-GM-AEJAA|3,GM-AEJ-GM-AEJA-GM-AEJA|3,GM-AEJA-GM-AEJA-GM-AEJ|3	33072			1846.8	GM-AEJ-GM-AEJVS (Deacetyl-Anhydro) |2	4875.2
1847	13.004	50.969	2717.19	2717.1644,2717.1644,2717.1644	GM-AEJ-GM-AEJ-GM-AEJAA|3,GM-AEJ-GM-AEJA-GM-AEJA|3,GM-AEJA-GM-AEJA-GM-AEJ|3	54914			1821.8	GM-AEJ-GM-AEJV|2	30639
1809	13.034	58.413	2717.15	2717.1644,2717.1644,2717.1644	GM-AEJ-GM-AEJ-GM-AEJAA|3,GM-AEJ-GM-AEJA-GM-AEJA|3,GM-AEJA-GM-AEJA-GM-AEJ|3	185110			1866.8046,1866.8246,1866.8038,1866.8038,1866.8038	GM-AEJ-GM-AEJW (Deacetyl) |2,GM-AEJ-GM-AEJVS (Deacetyl) |2,GM-AEJA-GM-AEJI (Double Anhydro) |2,GM-AEJA-GM-AEJL (Double Anhydro) |2,GM-AEJ-GM-AEJIA (Double Anhydro) |2	4471.1
757	13.097	40.291	2717.17	2717.1644,2717.1644,2717.1644	GM-AEJ-GM-AEJ-GM-AEJAA|3,GM-AEJ-GM-AEJA-GM-AEJA|3,GM-AEJA-GM-AEJA-GM-AEJ|3	15340			1722.73	GM-AEJ-GM-AEJ|2	715459
1845	13.018	52.89	2717.14	2717.1644,2717.1644,2717.1644	GM-AEJ-GM-AEJ-GM-AEJAA|3,GM-AEJ-GM-AEJA-GM-AEJA|3,GM-AEJA-GM-AEJA-GM-AEJ|3	94438			1313.5721,1313.5721	GM-AEJA-GM-AEJ (Amidase Product) |2,GM-AEJ-GM-AEJA (Amidase Product) |2	73473
1810	13.044	62.565	2717.12	2717.1644,2717.1644,2717.1644	GM-AEJ-GM-AEJ-GM-AEJAA|3,GM-AEJ-GM-AEJA-GM-AEJA|3,GM-AEJA-GM-AEJA-GM-AEJ|3	138990			1773.7413,1773.7413	GM-AEJA-GM-AEJ (Anhydro) |2,GM-AEJ-GM-AEJA (Anhydro) |2	1.02857e+06
1811	13.04	58.413	2717.18	2717.1644,2717.1644,2717.1644	GM-AEJ-GM-AEJ-GM-AEJAA|3,GM-AEJ-GM-AEJA-GM-AEJA|3,GM-AEJA-GM-AEJA-GM-AEJ|3	143910			1753.7151,1753.7151	GM-AEJA-GM-AEJ (Double Anhydro) |2,GM-AEJ-GM-AEJA (Double Anhydro) |2	16666.5
1812	13.032	52.89	2717.21	2717.1644,2717.1644,2717.1644	GM-AEJ-GM-AEJ-GM-AEJAA|3,GM-AEJ-GM-AEJA-GM-AEJA|3,GM-AEJA-GM-AEJA-GM-AEJ|3	91178			1384.6092,1384.6092	GM-AEJA-GM-AEJA (Amidase Product) |2,GM-AEJ-GM-AEJAA (Amidase Product) |2	408646
758	13.091	36.895	2717.21	2717.1644,2717.1644,2717.1644	GM-AEJ-GM-AEJ-GM-AEJAA|3,GM-AEJ-GM-AEJA-GM-AEJA|3,GM-AEJA-GM-AEJA-GM-AEJ|3	10395			1844.7784,1844.7784	GM-AEJA-GM-AEJA (Anhydro) |2,GM-AEJ-GM-AEJAA (Anhydro) |2	90841
756	13.091	40.291	2717.14	2717.1644,2717.1644,2717.1644	GM-AEJ-GM-AEJ-GM-AEJAA|3,GM-AEJ-GM-AEJA-GM-AEJA|3,GM-AEJA-GM-AEJA-GM-AEJ|3	43272			1844.7784,1844.7784,1844.7831	GM-AEJA-GM-AEJA (Anhydro) |2,GM-AEJ-GM-AEJAA (Anhydro) |2,GM-AEJ-GM-AEJSP (Deacetyl-Anhydro) |2	1150079
1846	13.02	52.89	2717.17	2717.1644,2717.1644,2717.1644	GM-AEJ-GM-AEJ-GM-AEJAA|3,GM-AEJ-GM-AEJA-GM-AEJA|3,GM-AEJA-GM-AEJA-GM-AEJ|3	82089			1844.7784,1844.7784,1844.8194,1844.8194,1844.8194,1844.7831	GM-AEJA-GM-AEJA (Anhydro) |2,GM-AEJ-GM-AEJAA (Anhydro) |2,GM-AEJA-GM-AEJI (Deacetyl-Anhydro) |2,GM-AEJA-GM-AEJL (Deacetyl-Anhydro) |2,GM-AEJ-GM-AEJIA (Deacetyl-Anhydro) |2,GM-AEJ-GM-AEJSP (Deacetyl-Anhydro) |2	958627
1722	12.571	32.37	2646.16	2646.1273,2646.1273	GM-AEJ-GM-AEJ-GM-AEJA|3,GM-AEJ-GM-AEJA-GM-AEJ|3	7697.6			1822.7941,1822.7941	GM-AEJA-GM-AEJA (Deacetyl) |2,GM-AEJ-GM-AEJAA (Deacetyl) |2	37038.1
1721	12.555	38.19	2646.13	2646.1273,2646.1273	GM-AEJ-GM-AEJ-GM-AEJA|3,GM-AEJ-GM-AEJA-GM-AEJ|3	11853			1824.7522,1824.7522	GM-AEJA-GM-AEJA (Double Anhydro) |2,GM-AEJ-GM-AEJAA (Double Anhydro) |2	195648
1720	12.515	43.398	2646.11	2646.1273,2646.1273	GM-AEJ-GM-AEJ-GM-AEJA|3,GM-AEJ-GM-AEJA-GM-AEJ|3	15012			1915.8155,1915.8565,1915.8202	GM-AEJA-GM-AEJAA (Anhydro) |2,GM-AEJA-GM-AEJIA (Deacetyl-Anhydro) |2,GM-AEJA-GM-AEJSP (Deacetyl-Anhydro) |2	10662
1719	12.541	12.153	2646.06	2646.1273,2646.1273	GM-AEJ-GM-AEJ-GM-AEJA|3,GM-AEJ-GM-AEJA-GM-AEJ|3	12367.3			1935.8417,1935.8828,1935.8465	GM-AEJA-GM-AEJAA|2,GM-AEJA-GM-AEJIA (Deacetyl) |2,GM-AEJA-GM-AEJSP (Deacetyl) |2	22950.3
1723	12.592	38.19	2646.08	2646.1273,2646.1273	GM-AEJ-GM-AEJ-GM-AEJA|3,GM-AEJ-GM-AEJA-GM-AEJ|3	11836			1935.8417,1935.8465	GM-AEJA-GM-AEJAA|2,GM-AEJA-GM-AEJSP (Deacetyl) |2	11460
1633	12.273	25.73	2307.99	2308.0061,2308.0061	GM-AEJ-GM-AEJA-GM-AEJAA (Amidase Product) |3,GM-AEJA-GM-AEJA-GM-AEJA (Amidase Product) |3	11607			1864.8046,1864.8046	GM-AEJA-GM-AEJA|2,GM-AEJ-GM-AEJAA|2	123920
1634	12.288	25.73	2308.01	2308.0061,2308.0061	GM-AEJ-GM-AEJA-GM-AEJAA (Amidase Product) |3,GM-AEJA-GM-AEJA-GM-AEJA (Amidase Product) |3	9684.6			1864.8046,1864.8046,1864.8094	GM-AEJA-GM-AEJA|2,GM-AEJ-GM-AEJAA|2,GM-AEJ-GM-AEJSP (Deacetyl) |2	1148200
715	12.331	27.713	2308.01	2308.0061,2308.0061	GM-AEJ-GM-AEJA-GM-AEJAA (Amidase Product) |3,GM-AEJA-GM-AEJA-GM-AEJA (Amidase Product) |3	7669			1864.8046,1864.8046,1864.8457,1864.8457,1864.8457,1864.8094	GM-AEJA-GM-AEJA|2,GM-AEJ-GM-AEJAA|2,GM-AEJA-GM-AEJI (Deacetyl) |2,GM-AEJA-GM-AEJL (Deacetyl) |2,GM-AEJ-GM-AEJIA (Deacetyl) |2,GM-AEJ-GM-AEJSP (Deacetyl) |2	772872
1635	12.259	25.73	2307.97	2308.0061,2308.0061	GM-AEJ-GM-AEJA-GM-AEJAA (Amidase Product) |3,GM-AEJA-GM-AEJA-GM-AEJA (Amidase Product) |3	9275.1			1854.77	GM-AEJA-GM-AEJC (Deacetyl) |2	3452.9
1651	12.288	18.426	2308.04	2308.0061,2308.0061	GM-AEJ-GM-AEJA-GM-AEJAA (Amidase Product) |3,GM-AEJA-GM-AEJA-GM-AEJA (Amidase Product) |3	5482.5			1896.78	GM-AEJA-GM-AEJC|2	46433.9
708	12.352	29.346	2307.98	2308.0061,2308.0061	GM-AEJ-GM-AEJA-GM-AEJAA (Amidase Product) |3,GM-AEJA-GM-AEJA-GM-AEJA (Amidase Product) |3	8222.9			1920.81	GM-AEJA-GM-AEJF (Anhydro) |2	8730.8
2287	15.187	51.585	2768.17	2768.1753,2768.1753	GM-AEJ-GM-AEJA-GM-AEJAA (Anhydro) |3,GM-AEJA-GM-AEJA-GM-AEJA (Anhydro) |3	169650			1920.814,1920.8421	GM-AEJA-GM-AEJF (Anhydro) |2,GM-AEJA-GM-AEJGA (Amidated) |2	20728.5
2291	15.181	42.675	2768.24	2768.1753,2768.1753	GM-AEJ-GM-AEJA-GM-AEJAA (Anhydro) |3,GM-AEJA-GM-AEJA-GM-AEJA (Anhydro) |3	43938			1920.814,1920.8421,1920.8832	GM-AEJA-GM-AEJF (Anhydro) |2,GM-AEJA-GM-AEJGA (Amidated) |2,GM-AEJA-GM-AEJK (Amidated) |2	4231.2
2088	14.379	26.009	2768.14	2768.1753,2768.1753	GM-AEJ-GM-AEJA-GM-AEJAA (Anhydro) |3,GM-AEJA-GM-AEJA-GM-AEJA (Anhydro) |3	6403.5			2068.9	GM-AEJA-GM-AEJFQ|2	36928.8
2083	14.406	20.149	2768.19	2768.1753,2768.1753	GM-AEJ-GM-AEJA-GM-AEJAA (Anhydro) |3,GM-AEJA-GM-AEJA-GM-AEJA (Anhydro) |3	6022.5			1940.84	GM-AEJA-GM-AEJF|2	161337
2286	15.156	45.898	2768.12	2768.1753,2768.1753	GM-AEJ-GM-AEJA-GM-AEJAA (Anhydro) |3,GM-AEJA-GM-AEJA-GM-AEJA (Anhydro) |3	79325			1370.5935,1370.5936	GM-AEJA-GM-AEJG (Amidase Product) |2,GM-AEJ-GM-AEJGA (Amidase Product) |2	3844.1
2296	15.213	64.037	2768.2	2768.1753,2768.1753	GM-AEJ-GM-AEJA-GM-AEJAA (Anhydro) |3,GM-AEJA-GM-AEJA-GM-AEJA (Anhydro) |3	237230			1830.7627,1830.7628	GM-AEJA-GM-AEJG (Anhydro) |2,GM-AEJ-GM-AEJGA (Anhydro) |2	4533.7
2298	15.22	56.169	2768.23	2768.1753,2768.1753	GM-AEJ-GM-AEJA-GM-AEJAA (Anhydro) |3,GM-AEJA-GM-AEJA-GM-AEJA (Anhydro) |3	151890			1830.7627,1830.7628,1830.8039,1830.8034,1830.8038,1830.8034	GM-AEJA-GM-AEJG (Anhydro) |2,GM-AEJ-GM-AEJGA (Anhydro) |2,GM-AEJ-GM-AEJK (Anhydro) |2,GM-AEJA-GM-AEJV (Deacetyl-Anhydro) |2,GM-AEJ-GM-AEJLG (Deacetyl-Anhydro) |2,GM-AEJ-GM-AEJVA (Deacetyl-Anhydro) |2	46865.1
2285	15.178	51.585	2768.14	2768.1753,2768.1753	GM-AEJ-GM-AEJA-GM-AEJAA (Anhydro) |3,GM-AEJA-GM-AEJA-GM-AEJA (Anhydro) |3	161110			1441.63	GM-AEJA-GM-AEJGA (Amidase Product) |2	4705.9
2089	14.406	32.068	2768.17	2768.1753,2768.1753	GM-AEJ-GM-AEJA-GM-AEJAA (Anhydro) |3,GM-AEJA-GM-AEJA-GM-AEJA (Anhydro) |3	8015.8			1901.8	GM-AEJA-GM-AEJGA (Anhydro) |2	8074.9
2288	15.183	47.941	2768.19	2768.1753,2768.1753	GM-AEJ-GM-AEJA-GM-AEJAA (Anhydro) |3,GM-AEJA-GM-AEJA-GM-AEJA (Anhydro) |3	122260			1901.7999,1901.841,1901.8409,1901.8405	GM-AEJA-GM-AEJGA (Anhydro) |2,GM-AEJA-GM-AEJK (Anhydro) |2,GM-AEJA-GM-AEJLG (Deacetyl-Anhydro) |2,GM-AEJA-GM-AEJVA (Deacetyl-Anhydro) |2	308806
2289	15.18	42.675	2768.22	2768.1753,2768.1753	GM-AEJ-GM-AEJA-GM-AEJAA (Anhydro) |3,GM-AEJA-GM-AEJA-GM-AEJA (Anhydro) |3	76204			1881.7737,1881.8148	GM-AEJA-GM-AEJGA (Double Anhydro) |2,GM-AEJA-GM-AEJK (Double Anhydro) |2	26675.4
2489	16.768	27.907	2748.21	2748.1491,2748.1491	GM-AEJ-GM-AEJA-GM-AEJAA (Double Anhydro) |3,GM-AEJA-GM-AEJA-GM-AEJA (Double Anhydro) |3	5652.2			1921.8261,1921.8672,1921.8672,1921.8668	GM-AEJA-GM-AEJGA|2,GM-AEJA-GM-AEJK|2,GM-AEJA-GM-AEJLG (Deacetyl) |2,GM-AEJA-GM-AEJVA (Deacetyl) |2	96149
2490	16.733	37.185	2748.18	2748.1491,2748.1491	GM-AEJ-GM-AEJA-GM-AEJAA (Double Anhydro) |3,GM-AEJA-GM-AEJA-GM-AEJA (Double Anhydro) |3	11058			1921.8261,1921.8672,1921.8672,1921.8668,1921.8099	GM-AEJA-GM-AEJGA|2,GM-AEJA-GM-AEJK|2,GM-AEJA-GM-AEJLG (Deacetyl) |2,GM-AEJA-GM-AEJVA (Deacetyl) |2,GM-AEJA-GM-AEJPA (Double Anhydro) |2	372600
2480	16.728	41.286	2748.11	2748.1491,2748.1491	GM-AEJ-GM-AEJA-GM-AEJAA (Double Anhydro) |3,GM-AEJA-GM-AEJA-GM-AEJA (Double Anhydro) |3	16991			1921.8261,1921.8099	GM-AEJA-GM-AEJGA|2,GM-AEJA-GM-AEJPA (Double Anhydro) |2	118683
2478	16.759	47.387	2748.13	2748.1491,2748.1491	GM-AEJ-GM-AEJA-GM-AEJAA (Double Anhydro) |3,GM-AEJA-GM-AEJA-GM-AEJA (Double Anhydro) |3	21858			1850.7889,1850.789,1850.8301,1850.8297,1850.8301,1850.8297	GM-AEJA-GM-AEJG|2,GM-AEJ-GM-AEJGA|2,GM-AEJ-GM-AEJK|2,GM-AEJA-GM-AEJV (Deacetyl) |2,GM-AEJ-GM-AEJLG (Deacetyl) |2,GM-AEJ-GM-AEJVA (Deacetyl) |2	96663.2
2463	16.781	51.671	2748.1	2748.1491,2748.1491	GM-AEJ-GM-AEJA-GM-AEJAA (Double Anhydro) |3,GM-AEJA-GM-AEJA-GM-AEJA (Double Anhydro) |3	48155			1850.7889,1850.789,1850.8301,1850.8297,1850.8301,1850.8297,1850.7728	GM-AEJA-GM-AEJG|2,GM-AEJ-GM-AEJGA|2,GM-AEJ-GM-AEJK|2,GM-AEJA-GM-AEJV (Deacetyl) |2,GM-AEJ-GM-AEJLG (Deacetyl) |2,GM-AEJ-GM-AEJVA (Deacetyl) |2,GM-AEJ-GM-AEJPA (Double Anhydro) |2	156404
2465	16.732	51.671	2748.16	2748.1491,2748.1491	GM-AEJ-GM-AEJA-GM-AEJAA (Double Anhydro) |3,GM-AEJA-GM-AEJA-GM-AEJA (Double Anhydro) |3	57005			1850.7889,1850.789,1850.7277,1850.7728	GM-AEJA-GM-AEJG|2,GM-AEJ-GM-AEJGA|2,Na+ GM-AEJ-GM (x2)|2,GM-AEJ-GM-AEJPA (Double Anhydro) |2	58146.1
2464	16.733	53.78	2748.13	2748.1491,2748.1491	GM-AEJ-GM-AEJA-GM-AEJAA (Double Anhydro) |3,GM-AEJA-GM-AEJA-GM-AEJA (Double Anhydro) |3	71927			1886.83,1886.83,1886.83	GM-AEJA-GM-AEJI (Anhydro) |2,GM-AEJA-GM-AEJL (Anhydro) |2,GM-AEJ-GM-AEJIA (Anhydro) |2	17952.2
2460	16.788	41.286	2748.16	2748.1491,2748.1491	GM-AEJ-GM-AEJA-GM-AEJAA (Double Anhydro) |3,GM-AEJA-GM-AEJA-GM-AEJA (Double Anhydro) |3	17843			1864.8457,1864.8457,1864.8457	GM-AEJA-GM-AEJI (Deacetyl) |2,GM-AEJA-GM-AEJL (Deacetyl) |2,GM-AEJ-GM-AEJIA (Deacetyl) |2	156163
2466	16.79	49.529	2748.19	2748.1491,2748.1491	GM-AEJ-GM-AEJA-GM-AEJAA (Double Anhydro) |3,GM-AEJA-GM-AEJA-GM-AEJA (Double Anhydro) |3	37315			1844.8194,1844.8194,1844.8194	GM-AEJA-GM-AEJI (Deacetyl-Anhydro) |2,GM-AEJA-GM-AEJL (Deacetyl-Anhydro) |2,GM-AEJ-GM-AEJIA (Deacetyl-Anhydro) |2	337800
1872	13.289	55.123	2788.17	2788.2015,2788.2015	GM-AEJ-GM-AEJA-GM-AEJAA|3,GM-AEJA-GM-AEJA-GM-AEJA|3	267210			1844.8194,1844.8194,1844.8194,1844.7831	GM-AEJA-GM-AEJI (Deacetyl-Anhydro) |2,GM-AEJA-GM-AEJL (Deacetyl-Anhydro) |2,GM-AEJ-GM-AEJIA (Deacetyl-Anhydro) |2,GM-AEJ-GM-AEJSP (Deacetyl-Anhydro) |2	284890
1922	13.317	44.625	2788.19	2788.2015,2788.2015	GM-AEJ-GM-AEJA-GM-AEJAA|3,GM-AEJA-GM-AEJA-GM-AEJA|3	212430			1977.89	GM-AEJA-GM-AEJIA|2	25572.6
1873	13.308	55.123	2788.2	2788.2015,2788.2015	GM-AEJ-GM-AEJA-GM-AEJAA|3,GM-AEJA-GM-AEJA-GM-AEJA|3	283930			1977.8933,1977.857	GM-AEJA-GM-AEJIA|2,GM-AEJA-GM-AEJSP|2	71596.8
1874	13.25	48.42	2788.23	2788.2015,2788.2015	GM-AEJ-GM-AEJA-GM-AEJAA|3,GM-AEJA-GM-AEJA-GM-AEJA|3	199570			1906.8562,1906.8562,1906.8562	GM-AEJA-GM-AEJI|2,GM-AEJA-GM-AEJL|2,GM-AEJ-GM-AEJIA|2	36436.2
1875	13.271	42.704	2788.26	2788.2015,2788.2015	GM-AEJ-GM-AEJA-GM-AEJAA|3,GM-AEJA-GM-AEJA-GM-AEJA|3	126100			1906.8562,1906.8562,1906.8562,1906.8199	GM-AEJA-GM-AEJI|2,GM-AEJA-GM-AEJL|2,GM-AEJ-GM-AEJIA|2,GM-AEJ-GM-AEJSP|2	63238
1921	13.32	44.625	2788.17	2788.2015,2788.2015	GM-AEJ-GM-AEJA-GM-AEJAA|3,GM-AEJA-GM-AEJA-GM-AEJA|3	196340			1901.841,1901.8409,1901.8405	GM-AEJA-GM-AEJK (Anhydro) |2,GM-AEJA-GM-AEJLG (Deacetyl-Anhydro) |2,GM-AEJA-GM-AEJVA (Deacetyl-Anhydro) |2	106281
1923	13.318	38.738	2788.14	2788.2015,2788.2015	GM-AEJ-GM-AEJA-GM-AEJAA|3,GM-AEJA-GM-AEJA-GM-AEJA|3	91394			1881.81	GM-AEJA-GM-AEJK (Double Anhydro) |2	6290.3
1871	13.273	46.499	2788.14	2788.2015,2788.2015	GM-AEJ-GM-AEJA-GM-AEJAA|3,GM-AEJA-GM-AEJA-GM-AEJA|3	161062			2057.9374,2057.9409	GM-AEJA-GM-AEJKR (Anhydro) |2,GM-AEJA-GM-AEJRE (Anhydro) |2	5985.1
1925	13.29	38.738	2788.24	2788.2015,2788.2015	GM-AEJ-GM-AEJA-GM-AEJAA|3,GM-AEJA-GM-AEJA-GM-AEJA|3	98927			2057.9374,2057.9409,2057.9046	GM-AEJA-GM-AEJKR (Anhydro) |2,GM-AEJA-GM-AEJRE (Anhydro) |2,GM-AEJA-GM-AEJRQ (Anhydro) |2	15961.8
1926	13.267	33.426	2788.27	2788.2015,2788.2015	GM-AEJ-GM-AEJA-GM-AEJAA|3,GM-AEJA-GM-AEJA-GM-AEJA|3	58436			2077.9636,2077.9671	GM-AEJA-GM-AEJKR|2,GM-AEJA-GM-AEJRE|2	25819.1
1924	13.293	38.738	2788.22	2788.2015,2788.2015	GM-AEJ-GM-AEJA-GM-AEJAA|3,GM-AEJA-GM-AEJA-GM-AEJA|3	153640			2077.9636,2077.9671,2077.9308	GM-AEJA-GM-AEJKR|2,GM-AEJA-GM-AEJRE|2,GM-AEJA-GM-AEJRQ|2	76754
2295	15.219	18.488	2789.23	2789.17	GM-AEJ-GM-AEJA-GM-AEJY (Anhydro) |3	4607.7			2087.9203,2087.9209	GM-AEJA-GM-AEJKW (Anhydro) |2,GM-AEJA-GM-AEJWE (Anhydro) |2	4997.9
2319	15.23	59.754	2767.13	2767.18	GM-AEJ-GM-AEJA-GM-AEJY (Deacetyl) |3	240930			2107.9465,2107.9471	GM-AEJA-GM-AEJKW|2,GM-AEJA-GM-AEJWE|2	52649.7
2084	14.391	40.154	2767.22	2767.18	GM-AEJ-GM-AEJA-GM-AEJY (Deacetyl) |3	7381.3			1921.8672,1921.8672,1921.8668	GM-AEJA-GM-AEJK|2,GM-AEJA-GM-AEJLG (Deacetyl) |2,GM-AEJA-GM-AEJVA (Deacetyl) |2	330295
2391	15.201	59.754	2767.16	2767.18	GM-AEJ-GM-AEJA-GM-AEJY (Deacetyl) |3	297220			1963.8777,1963.8773	GM-AEJA-GM-AEJLG|2,GM-AEJA-GM-AEJVA|2	11823.5
2398	16.246	6.366	2747.12	2747.16	GM-AEJ-GM-AEJA-GM-AEJY (Deacetyl-Anhydro) |3	4420.7			1904.786,1904.786,1904.7861,1904.8046,1904.8312,1904.8672,1904.8678	GM-AEJA-GM-AEJM (Anhydro) |2,GM-AEJ-GM-AEJMA (Anhydro) |2,GM-AEJ-GM-AEJVC (Anhydro) |2,GM-AEJ-GM-AEJTT (Anhydro) |2,M-AEJA-GM-AEJQW|2,M-AEJA-GM-AEJKW|2,M-AEJA-GM-AEJWE|2	7497.4
2092	14.611	106.222	2769.14	2769.14	GM-AEJ-GM-AEJA-GM-AEJY (Double Anhydro) |3	292420			1882.8017,1882.8017,1882.7835,1882.8018	GM-AEJA-GM-AEJM (Deacetyl) |2,GM-AEJ-GM-AEJMA (Deacetyl) |2,GM-AEJ-GM-AEJSD (Deacetyl) |2,GM-AEJ-GM-AEJVC (Deacetyl) |2	13623
2093	14.587	110.505	2769.17	2769.14	GM-AEJ-GM-AEJA-GM-AEJY (Double Anhydro) |3	296410			1882.8017,1882.8017,1882.7835,1882.8018,1882.8203	GM-AEJA-GM-AEJM (Deacetyl) |2,GM-AEJ-GM-AEJMA (Deacetyl) |2,GM-AEJ-GM-AEJSD (Deacetyl) |2,GM-AEJ-GM-AEJVC (Deacetyl) |2,GM-AEJ-GM-AEJTT (Deacetyl) |2	47455.8
1906	13.34	10.216	2809.26	2809.19	GM-AEJ-GM-AEJA-GM-AEJY|3	4437			1862.7754,1862.7754,1862.7572,1862.7755,1862.794	GM-AEJA-GM-AEJM (Deacetyl-Anhydro) |2,GM-AEJ-GM-AEJMA (Deacetyl-Anhydro) |2,GM-AEJ-GM-AEJSD (Deacetyl-Anhydro) |2,GM-AEJ-GM-AEJVC (Deacetyl-Anhydro) |2,GM-AEJ-GM-AEJTT (Deacetyl-Anhydro) |2	16540.5
1898	13.276	31.513	2809.21	2809.19	GM-AEJ-GM-AEJA-GM-AEJY|3	13825			1862.7754,1862.7754,1862.7755,1862.794	GM-AEJA-GM-AEJM (Deacetyl-Anhydro) |2,GM-AEJ-GM-AEJMA (Deacetyl-Anhydro) |2,GM-AEJ-GM-AEJVC (Deacetyl-Anhydro) |2,GM-AEJ-GM-AEJTT (Deacetyl-Anhydro) |2	6758.7
1853	13.187	6.364	2809.26	2809.19	GM-AEJ-GM-AEJA-GM-AEJY|3	4033.3			1515.6539,1515.654,1515.6725	GM-AEJA-GM-AEJMA (Amidase Product) |2,GM-AEJA-GM-AEJVC (Amidase Product) |2,GM-AEJA-GM-AEJTT (Amidase Product) |2	9531.2
1542	12.066	35.12	1866.76	1866.7887,1866.7891,1866.7675	GM-AEJ-GM-AEJDA (Deacetyl) |2,GM-AEJ-GM-AEJEG (Deacetyl) |2,GM-AEJ-GM-AEJSP (Double Anhydro) |2	14458			1975.8231,1975.8049,1975.8232	GM-AEJA-GM-AEJMA (Anhydro) |2,GM-AEJA-GM-AEJSD (Anhydro) |2,GM-AEJA-GM-AEJVC (Anhydro) |2	4113.6
863	14.595	32.551	1866.75	1866.7887,1866.7891,1866.7675	GM-AEJ-GM-AEJDA (Deacetyl) |2,GM-AEJ-GM-AEJEG (Deacetyl) |2,GM-AEJ-GM-AEJSP (Double Anhydro) |2	5447.7			1995.8493,1995.8311,1995.8494,1995.8679	GM-AEJA-GM-AEJMA|2,GM-AEJA-GM-AEJSD|2,GM-AEJA-GM-AEJVC|2,GM-AEJA-GM-AEJTT|2	23567
2173	14.575	37.946	1866.83	1866.7887,1866.7891,1866.8046,1866.8246,1866.8038,1866.8038,1866.8038	GM-AEJ-GM-AEJDA (Deacetyl) |2,GM-AEJ-GM-AEJEG (Deacetyl) |2,GM-AEJ-GM-AEJW (Deacetyl) |2,GM-AEJ-GM-AEJVS (Deacetyl) |2,GM-AEJA-GM-AEJI (Double Anhydro) |2,GM-AEJA-GM-AEJL (Double Anhydro) |2,GM-AEJ-GM-AEJIA (Double Anhydro) |2	8568.1			1924.8122,1924.8122,1924.794,1924.8123	GM-AEJA-GM-AEJM|2,GM-AEJ-GM-AEJMA|2,GM-AEJ-GM-AEJSD|2,GM-AEJ-GM-AEJVC|2	9692
1532	12.089	40.281	1866.82	1866.7887,1866.7891,1866.8046,1866.8246,1866.8038,1866.8038,1866.8038	GM-AEJ-GM-AEJDA (Deacetyl) |2,GM-AEJ-GM-AEJEG (Deacetyl) |2,GM-AEJ-GM-AEJW (Deacetyl) |2,GM-AEJ-GM-AEJVS (Deacetyl) |2,GM-AEJA-GM-AEJI (Double Anhydro) |2,GM-AEJA-GM-AEJL (Double Anhydro) |2,GM-AEJ-GM-AEJIA (Double Anhydro) |2	89182			1924.8122,1924.8122,1924.794,1924.8123,1924.8308	GM-AEJA-GM-AEJM|2,GM-AEJ-GM-AEJMA|2,GM-AEJ-GM-AEJSD|2,GM-AEJ-GM-AEJVC|2,GM-AEJ-GM-AEJTT|2	36203.7
2171	14.581	47.092	1866.78	1866.7887,1866.7891,1866.8046,1866.8246,1866.8038,1866.8038,1866.8038,1866.7675	GM-AEJ-GM-AEJDA (Deacetyl) |2,GM-AEJ-GM-AEJEG (Deacetyl) |2,GM-AEJ-GM-AEJW (Deacetyl) |2,GM-AEJ-GM-AEJVS (Deacetyl) |2,GM-AEJA-GM-AEJI (Double Anhydro) |2,GM-AEJA-GM-AEJL (Double Anhydro) |2,GM-AEJ-GM-AEJIA (Double Anhydro) |2,GM-AEJ-GM-AEJSP (Double Anhydro) |2	23026			1941.84	GM-AEJA-GM-AEJPA (Anhydro) |2	14876.6
2172	14.64	43.375	1866.81	1866.7887,1866.7891,1866.8046,1866.8246,1866.8038,1866.8038,1866.8038,1866.7675	GM-AEJ-GM-AEJDA (Deacetyl) |2,GM-AEJ-GM-AEJEG (Deacetyl) |2,GM-AEJ-GM-AEJW (Deacetyl) |2,GM-AEJ-GM-AEJVS (Deacetyl) |2,GM-AEJA-GM-AEJI (Double Anhydro) |2,GM-AEJA-GM-AEJL (Double Anhydro) |2,GM-AEJ-GM-AEJIA (Double Anhydro) |2,GM-AEJ-GM-AEJSP (Double Anhydro) |2	14978			1961.86	GM-AEJA-GM-AEJPA|2	47229.2
2170	14.53	48.712	1866.76	1866.7887,1866.7891,1866.8046,1866.8038,1866.8038,1866.8038,1866.7675	GM-AEJ-GM-AEJDA (Deacetyl) |2,GM-AEJ-GM-AEJEG (Deacetyl) |2,GM-AEJ-GM-AEJW (Deacetyl) |2,GM-AEJA-GM-AEJI (Double Anhydro) |2,GM-AEJA-GM-AEJL (Double Anhydro) |2,GM-AEJ-GM-AEJIA (Double Anhydro) |2,GM-AEJ-GM-AEJSP (Double Anhydro) |2	35978			2087.88	GM-AEJA-GM-AEJQW (Anhydro) |2	6457
1531	12.106	38.436	1866.77	1866.7887,1866.7891,1866.8046,1866.8038,1866.8038,1866.8038,1866.7675	GM-AEJ-GM-AEJDA (Deacetyl) |2,GM-AEJ-GM-AEJEG (Deacetyl) |2,GM-AEJ-GM-AEJW (Deacetyl) |2,GM-AEJA-GM-AEJI (Double Anhydro) |2,GM-AEJA-GM-AEJL (Double Anhydro) |2,GM-AEJ-GM-AEJIA (Double Anhydro) |2,GM-AEJ-GM-AEJSP (Double Anhydro) |2	46840			2087.8843,2087.9203,2087.9209	GM-AEJA-GM-AEJQW (Anhydro) |2,GM-AEJA-GM-AEJKW (Anhydro) |2,GM-AEJA-GM-AEJWE (Anhydro) |2	56144.5
2440	16.691	25.806	1846.72	1846.7624,1846.7628	GM-AEJ-GM-AEJDA (Deacetyl-Anhydro) |2,GM-AEJ-GM-AEJEG (Deacetyl-Anhydro) |2	5871.5			2107.91	GM-AEJA-GM-AEJQW|2	47422.6
2441	16.647	25.806	1846.75	1846.7624,1846.7628,1846.7783	GM-AEJ-GM-AEJDA (Deacetyl-Anhydro) |2,GM-AEJ-GM-AEJEG (Deacetyl-Anhydro) |2,GM-AEJ-GM-AEJW (Deacetyl-Anhydro) |2	5173.3			2107.9105,2107.9465,2107.9471	GM-AEJA-GM-AEJQW|2,GM-AEJA-GM-AEJKW|2,GM-AEJA-GM-AEJWE|2	186013
1625	11.999	35.12	1846.79	1846.7624,1846.7628,1846.7783,1846.7983	GM-AEJ-GM-AEJDA (Deacetyl-Anhydro) |2,GM-AEJ-GM-AEJEG (Deacetyl-Anhydro) |2,GM-AEJ-GM-AEJW (Deacetyl-Anhydro) |2,GM-AEJ-GM-AEJVS (Deacetyl-Anhydro) |2	11269			1975.8	GM-AEJA-GM-AEJSD (Anhydro) |2	5310.1
1626	12.113	33.452	1846.77	1846.7624,1846.7628,1846.7783,1846.7983	GM-AEJ-GM-AEJDA (Deacetyl-Anhydro) |2,GM-AEJ-GM-AEJEG (Deacetyl-Anhydro) |2,GM-AEJ-GM-AEJW (Deacetyl-Anhydro) |2,GM-AEJ-GM-AEJVS (Deacetyl-Anhydro) |2	8931.8			1515.67	GM-AEJA-GM-AEJTT (Amidase Product) |2	8281.8
1330	11.316	21.98	1908.76	1908.7992,1908.7996	GM-AEJ-GM-AEJDA|2,GM-AEJ-GM-AEJEG|2	4853.8			1872.814,1872.8144,1872.814	GM-AEJA-GM-AEJV (Anhydro) |2,GM-AEJ-GM-AEJLG (Anhydro) |2,GM-AEJ-GM-AEJVA (Anhydro) |2	6112.6
1331	11.23	23.97	1908.79	1908.7992,1908.7996,1908.8151	GM-AEJ-GM-AEJDA|2,GM-AEJ-GM-AEJEG|2,GM-AEJ-GM-AEJW|2	6557.1			1852.7878,1852.7882,1852.7878	GM-AEJA-GM-AEJV (Double Anhydro) |2,GM-AEJ-GM-AEJLG (Double Anhydro) |2,GM-AEJ-GM-AEJVA (Double Anhydro) |2	48428.3
1327	11.231	19.959	1908.81	1908.7992,1908.7996,1908.8151,1908.8351	GM-AEJ-GM-AEJDA|2,GM-AEJ-GM-AEJEG|2,GM-AEJ-GM-AEJW|2,GM-AEJ-GM-AEJVS|2	5360.3			1892.8402,1892.8406,1892.8402	GM-AEJA-GM-AEJV|2,GM-AEJ-GM-AEJLG|2,GM-AEJ-GM-AEJVA|2	17515.8
1632	11.954	33.452	1846.81	1846.7628,1846.7783,1846.7983	GM-AEJ-GM-AEJEG (Deacetyl-Anhydro) |2,GM-AEJ-GM-AEJW (Deacetyl-Anhydro) |2,GM-AEJ-GM-AEJVS (Deacetyl-Anhydro) |2	8243			1936.81	GM-AEJA-GM-AEJY (Anhydro) |2	10483.2
1594	12.108	38.436	1869.83	1869.8	GM-AEJ-GM-AEJF|2	15104			1956.83	GM-AEJA-GM-AEJY|2	89869.4
1414	11.503	23.756	1830.83	1830.8039,1830.8034,1830.8038,1830.8034	GM-AEJ-GM-AEJK (Anhydro) |2,GM-AEJA-GM-AEJV (Deacetyl-Anhydro) |2,GM-AEJ-GM-AEJLG (Deacetyl-Anhydro) |2,GM-AEJ-GM-AEJVA (Deacetyl-Anhydro) |2	4170			1793.7675,1793.7675	GM-AEJA-GM-AEJ|2,GM-AEJ-GM-AEJA|2	3.49367e+06
1868	13.186	29.059	1830.83	1830.8039,1830.8034,1830.8038,1830.8034	GM-AEJ-GM-AEJK (Anhydro) |2,GM-AEJA-GM-AEJV (Deacetyl-Anhydro) |2,GM-AEJ-GM-AEJLG (Deacetyl-Anhydro) |2,GM-AEJ-GM-AEJVA (Deacetyl-Anhydro) |2	5016.8			1621.68	GM-AEJA-GM-AE|2	13635.4
1230	11.05	13.874	2006.94	2006.9265,2006.93	GM-AEJ-GM-AEJKR|2,GM-AEJ-GM-AEJRE|2	5790.2			1242.5346,1242.535	GM-AEJWW|1,GM-AEJ-GM-AEJ (Amidase Product) |2	4837
1229	11.028	19.185	2006.92	2006.9265,2006.93,2006.8937	GM-AEJ-GM-AEJKR|2,GM-AEJ-GM-AEJRE|2,GM-AEJ-GM-AEJRQ|2	7159.5			2200.93	GM-GM-AEJ-GM-AEJ|2	74995.2
543	11.011	22.727	2006.93	2006.9265,2006.93,2006.8937	GM-AEJ-GM-AEJKR|2,GM-AEJ-GM-AEJRE|2,GM-AEJ-GM-AEJRQ|2	6540.6			2343.0024,2343.0024	GM-GM-AEJA-GM-AEJA|2,GM-GM-AEJ-GM-AEJAA|2	943833
1231	11.006	17.327	2006.9	2006.9265,2006.93,2006.8937,2006.862	GM-AEJ-GM-AEJKR|2,GM-AEJ-GM-AEJRE|2,GM-AEJ-GM-AEJRQ|2,GM-AEJA-GM-AEJFQ (Deacetyl-Anhydro) |2	8183.5			2400.0239,2400.065	GM-GM-AEJA-GM-AEJGA|2,GM-GM-AEJA-GM-AEJK|2	54045.3
542	11.013	22.727	2006.9	2006.9265,2006.93,2006.8937,2006.862	GM-AEJ-GM-AEJKR|2,GM-AEJ-GM-AEJRE|2,GM-AEJ-GM-AEJRQ|2,GM-AEJA-GM-AEJFQ (Deacetyl-Anhydro) |2	6592.2			2271.9653,2271.9653	GM-GM-AEJA-GM-AEJ|2,GM-GM-AEJ-GM-AEJA|2	317918
1328	11.229	27.914	2036.93	2036.9094,2036.91	GM-AEJ-GM-AEJKW|2,GM-AEJ-GM-AEJWE|2	5202.6			1476.627,1476.6368	GM-GM-AEJGA|1,GM-AEJA-GM-AEJY (Amidase Product) |2	68708.3
594	11.232	10.263	2036.93	2036.9094,2036.91	GM-AEJ-GM-AEJKW|2,GM-AEJ-GM-AEJWE|2	4894.3			1476.627,1476.6681,1476.6368	GM-GM-AEJGA|1,GM-GM-AEJK|1,GM-AEJA-GM-AEJY (Amidase Product) |2	148816
1340	11.343	37.512	2036.86	2036.9094,2036.91,2036.8734	GM-AEJ-GM-AEJKW|2,GM-AEJ-GM-AEJWE|2,GM-AEJ-GM-AEJQW|2	10592			1348.5684,1348.5504	GM-GM-AEJ|1,GM-AEJ-GM (x2) (Amidase Product) |2	435725
1341	11.344	35.628	2036.89	2036.9094,2036.91,2036.8734	GM-AEJ-GM-AEJKW|2,GM-AEJ-GM-AEJWE|2,GM-AEJ-GM-AEJQW|2	11110			1866.7017,1866.7887,1866.7891,1866.7675	K+ GM-AEJ-GM (x2)|2,GM-AEJ-GM-AEJDA (Deacetyl) |2,GM-AEJ-GM-AEJEG (Deacetyl) |2,GM-AEJ-GM-AEJSP (Double Anhydro) |2	86117
1342	11.338	29.673	2036.91	2036.9094,2036.91,2036.8734	GM-AEJ-GM-AEJKW|2,GM-AEJ-GM-AEJWE|2,GM-AEJ-GM-AEJQW|2	9350.8			1866.7017,1866.7675	K+ GM-AEJ-GM (x2)|2,GM-AEJ-GM-AEJSP (Double Anhydro) |2	34871.7
611	11.254	38.387	2036.87	2036.9094,2036.91,2036.8734	GM-AEJ-GM-AEJKW|2,GM-AEJ-GM-AEJWE|2,GM-AEJ-GM-AEJQW|2	7837.9			1962.7867,1962.8221	K+ GM-AEJ-GM-AEJTT|2,Na+ GM-AEJA-GM-AEJF|2	4621.4
1206	10.935	20.439	2036.86	2036.9094,2036.91,2036.8734	GM-AEJ-GM-AEJKW|2,GM-AEJ-GM-AEJWE|2,GM-AEJ-GM-AEJQW|2	6752.3			1944.8121,1944.8121,1944.8121,1944.7758,1944.8569	K+ GM-AEJA-GM-AEJI|2,K+ GM-AEJA-GM-AEJL|2,K+ GM-AEJ-GM-AEJIA|2,K+ GM-AEJ-GM-AEJSP|2,GM-AEJ-GM-AEJRQ (Deacetyl-Anhydro) |2	4370.5
1207	10.963	20.439	2036.88	2036.9094,2036.91,2036.8734	GM-AEJ-GM-AEJKW|2,GM-AEJ-GM-AEJWE|2,GM-AEJ-GM-AEJQW|2	7096.5			1962.7681,1962.7681,1962.7682,1962.7867,1962.8221	K+ GM-AEJA-GM-AEJM|2,K+ GM-AEJ-GM-AEJMA|2,K+ GM-AEJ-GM-AEJVC|2,K+ GM-AEJ-GM-AEJTT|2,Na+ GM-AEJA-GM-AEJF|2	6114.1
1178	10.746	33.406	1850.85	1850.8301,1850.8297,1850.8301,1850.8297	GM-AEJ-GM-AEJK|2,GM-AEJA-GM-AEJV (Deacetyl) |2,GM-AEJ-GM-AEJLG (Deacetyl) |2,GM-AEJ-GM-AEJVA (Deacetyl) |2	35382			1930.7961,1930.7965,1930.7961,1930.7811,1930.7815,1930.797,1930.817	K+ GM-AEJA-GM-AEJV|2,K+ GM-AEJ-GM-AEJLG|2,K+ GM-AEJ-GM-AEJVA|2,Na+ GM-AEJ-GM-AEJDA|2,Na+ GM-AEJ-GM-AEJEG|2,Na+ GM-AEJ-GM-AEJW|2,Na+ GM-AEJ-GM-AEJVS|2	22952.7
525	10.792	29.819	1850.87	1850.8301,1850.8297,1850.8301,1850.8297	GM-AEJ-GM-AEJK|2,GM-AEJA-GM-AEJV (Deacetyl) |2,GM-AEJ-GM-AEJLG (Deacetyl) |2,GM-AEJ-GM-AEJVA (Deacetyl) |2	21312.5			1930.7961,1930.7965,1930.7961,1930.797,1930.817	K+ GM-AEJA-GM-AEJV|2,K+ GM-AEJ-GM-AEJLG|2,K+ GM-AEJ-GM-AEJVA|2,Na+ GM-AEJ-GM-AEJW|2,Na+ GM-AEJ-GM-AEJVS|2	12001.8
1180	10.742	29.819	1850.87	1850.8301,1850.8297,1850.8301,1850.8297	GM-AEJ-GM-AEJK|2,GM-AEJA-GM-AEJV (Deacetyl) |2,GM-AEJ-GM-AEJLG (Deacetyl) |2,GM-AEJ-GM-AEJVA (Deacetyl) |2	21370			1661.7253,1661.7253	M-AEJA-GM-AEJA|2,M-AEJ-GM-AEJAA|2	32763.4
526	10.785	31.703	1850.85	1850.8301,1850.8297,1850.8301,1850.8297	GM-AEJ-GM-AEJK|2,GM-AEJA-GM-AEJV (Deacetyl) |2,GM-AEJ-GM-AEJLG (Deacetyl) |2,GM-AEJ-GM-AEJVA (Deacetyl) |2	24296			1865.82	M-AEJA-GM-AEJFQ|2	4587.4
529	10.804	16.881	1890.85	1890.83	GM-AEJ-GM-AEJPA|2	11737.3			1792.77,1792.7518,1792.7701,1792.7886,1792.7835,1792.7835	M-AEJA-GM-AEJMA|2,M-AEJA-GM-AEJSD|2,M-AEJA-GM-AEJVC|2,M-AEJA-GM-AEJTT|2,GM-AEJA-GM-AEJ (Amidated) |2,GM-AEJ-GM-AEJA (Amidated) |2	43636
530	10.801	20.439	1890.87	1890.83	GM-AEJ-GM-AEJPA|2	7802.3			1792.77,1792.7701,1792.7886,1792.7835,1792.7835	M-AEJA-GM-AEJMA|2,M-AEJA-GM-AEJVC|2,M-AEJA-GM-AEJTT|2,GM-AEJA-GM-AEJ (Amidated) |2,GM-AEJ-GM-AEJA (Amidated) |2	11977
1193	10.842	20.439	1890.85	1890.83	GM-AEJ-GM-AEJPA|2	8910			1792.7886,1792.7835,1792.7835	M-AEJA-GM-AEJTT|2,GM-AEJA-GM-AEJ (Amidated) |2,GM-AEJ-GM-AEJA (Amidated) |2	7244.3
596	11.283	8.273	2036.85	2036.87	GM-AEJ-GM-AEJQW|2	6077.9			1753.7529,1753.7151,1753.7151	M-AEJA-GM-AEJY|2,GM-AEJA-GM-AEJ (Double Anhydro) |2,GM-AEJ-GM-AEJA (Double Anhydro) |2	30293.3
1672	12.461	39.36	1882.75	1882.78	GM-AEJ-GM-AEJSD (Deacetyl) |2	17862			1872.7708,1872.7709	Na+ GM-AEJA-GM-AEJG|2,Na+ GM-AEJ-GM-AEJGA|2	9804.1
1417	11.501	26.666	1904.85	1904.8046,1904.8312,1904.8672,1904.8678	GM-AEJ-GM-AEJTT (Anhydro) |2,M-AEJA-GM-AEJQW|2,M-AEJA-GM-AEJKW|2,M-AEJA-GM-AEJWE|2	7886.6			1872.7708,1872.7709,1872.812	Na+ GM-AEJA-GM-AEJG|2,Na+ GM-AEJ-GM-AEJGA|2,Na+ GM-AEJ-GM-AEJK|2	22947
1086	8.459	40.469	1882.85	1882.82	GM-AEJ-GM-AEJTT (Deacetyl) |2	13161			1872.7708,1872.7709,1872.812,1872.814,1872.8144,1872.814	Na+ GM-AEJA-GM-AEJG|2,Na+ GM-AEJ-GM-AEJGA|2,Na+ GM-AEJ-GM-AEJK|2,GM-AEJA-GM-AEJV (Anhydro) |2,GM-AEJ-GM-AEJLG (Anhydro) |2,GM-AEJ-GM-AEJVA (Anhydro) |2	52335.6
1395	11.538	42.342	1801.74	1801.78	GM-AEJ-GM-AEJV (Anhydro) |2	20087			3159.29	GM-AEJ-GM-AEJ-GM (x3)|3	9954.2
1401	11.579	35.748	1801.79	1801.78	GM-AEJ-GM-AEJV (Anhydro) |2	8638.4			2645.1433,2645.1433	GM-AEJ-GM-AEJ-GM-AEJA (Amidated) |3,GM-AEJ-GM-AEJA-GM-AEJ (Amidated) |3	4983.6
1431	11.551	30.915	1801.74	1801.78	GM-AEJ-GM-AEJV (Anhydro) |2	6158.8			2626.1011,2626.1011	GM-AEJ-GM-AEJ-GM-AEJA (Anhydro) |3,GM-AEJ-GM-AEJA-GM-AEJ (Anhydro) |3	11975.2
1447	11.568	26.63	1801.82	1801.78	GM-AEJ-GM-AEJV (Anhydro) |2	5157.1			2716.1804,2716.1804,2716.1804	GM-AEJ-GM-AEJ-GM-AEJAA (Amidated) |3,GM-AEJ-GM-AEJA-GM-AEJA (Amidated) |3,GM-AEJA-GM-AEJA-GM-AEJ (Amidated) |3	6661.1
1393	11.557	42.342	1801.76	1801.78	GM-AEJ-GM-AEJV (Anhydro) |2	17611			2697.1382,2697.1382,2697.1382	GM-AEJ-GM-AEJ-GM-AEJAA (Anhydro) |3,GM-AEJ-GM-AEJA-GM-AEJA (Anhydro) |3,GM-AEJA-GM-AEJA-GM-AEJ (Anhydro) |3	409366
682	12.052	44.229	1866.86	1866.82	GM-AEJ-GM-AEJVS (Deacetyl) |2	40183			2677.112,2677.112,2677.112	GM-AEJ-GM-AEJ-GM-AEJAA (Double Anhydro) |3,GM-AEJ-GM-AEJA-GM-AEJA (Double Anhydro) |3,GM-AEJA-GM-AEJA-GM-AEJ (Double Anhydro) |3	57735.3
1603	11.954	27.602	1846.83	1846.8	GM-AEJ-GM-AEJVS (Deacetyl-Anhydro) |2	4875.2			2717.1644,2717.1644,2717.1644	GM-AEJ-GM-AEJ-GM-AEJAA|3,GM-AEJ-GM-AEJA-GM-AEJA|3,GM-AEJA-GM-AEJA-GM-AEJ|3	957633
2077	14.285	28.467	1821.77	1821.8	GM-AEJ-GM-AEJV|2	6411.4			2646.1273,2646.1273	GM-AEJ-GM-AEJ-GM-AEJA|3,GM-AEJ-GM-AEJA-GM-AEJ|3	58765.9
2082	14.308	30.147	1821.81	1821.8	GM-AEJ-GM-AEJV|2	8120.4			2308.0061,2308.0061	GM-AEJ-GM-AEJA-GM-AEJAA (Amidase Product) |3,GM-AEJA-GM-AEJA-GM-AEJA (Amidase Product) |3	51941.1
2079	14.296	22.757	1821.83	1821.8	GM-AEJ-GM-AEJV|2	5126.2			2768.1753,2768.1753	GM-AEJ-GM-AEJA-GM-AEJAA (Anhydro) |3,GM-AEJA-GM-AEJA-GM-AEJA (Anhydro) |3	1.06205e+06
2081	14.289	40.277	1821.79	1821.8	GM-AEJ-GM-AEJV|2	10981			2748.1491,2748.1491	GM-AEJ-GM-AEJA-GM-AEJAA (Double Anhydro) |3,GM-AEJA-GM-AEJA-GM-AEJA (Double Anhydro) |3	287804
2183	14.645	31.085	1866.85	1866.8046,1866.8246,1866.8038,1866.8038,1866.8038	GM-AEJ-GM-AEJW (Deacetyl) |2,GM-AEJ-GM-AEJVS (Deacetyl) |2,GM-AEJA-GM-AEJI (Double Anhydro) |2,GM-AEJA-GM-AEJL (Double Anhydro) |2,GM-AEJ-GM-AEJIA (Double Anhydro) |2	4471.1			2788.2015,2788.2015	GM-AEJ-GM-AEJA-GM-AEJAA|3,GM-AEJA-GM-AEJA-GM-AEJA|3	1849039
1235	11.016	38.788	1722.7	1722.73	GM-AEJ-GM-AEJ|2	119070			2789.17	GM-AEJ-GM-AEJA-GM-AEJY (Anhydro) |3	4607.7
1233	11.011	36.987	1722.76	1722.73	GM-AEJ-GM-AEJ|2	80816			2767.18	GM-AEJ-GM-AEJA-GM-AEJY (Deacetyl) |3	545531
1226	11.132	25.6	1722.76	1722.73	GM-AEJ-GM-AEJ|2	7856.6			2747.16	GM-AEJ-GM-AEJA-GM-AEJY (Deacetyl-Anhydro) |3	4420.7
1225	11.116	31.757	1722.75	1722.73	GM-AEJ-GM-AEJ|2	12298			2769.14	GM-AEJ-GM-AEJA-GM-AEJY (Double Anhydro) |3	588830
1237	10.999	40.375	1722.74	1722.73	GM-AEJ-GM-AEJ|2	129070			2809.19	GM-AEJ-GM-AEJA-GM-AEJY|3	22295.3
545	10.993	33.481	1722.7	1722.73	GM-AEJ-GM-AEJ|2	48130.4			2800.15	GM-AEJA-GM-AEJA-GM-AEJC (Anhydro) |3	8224.4
1223	11.024	27.049	1722.69	1722.73	GM-AEJ-GM-AEJ|2	9385.1			2820.18	GM-AEJA-GM-AEJA-GM-AEJC|3	22319.4
1222	11.056	31.757	1722.72	1722.73	GM-AEJ-GM-AEJ|2	24809			2365.03	GM-AEJA-GM-AEJA-GM-AEJGA (Amidase Product) |3	47950.9
1221	11.055	31.757	1722.71	1722.73	GM-AEJ-GM-AEJ|2	20116			2365.0276,2365.0687	GM-AEJA-GM-AEJA-GM-AEJGA (Amidase Product) |3,GM-AEJA-GM-AEJA-GM-AEJK (Amidase Product) |3	14141.4
547	11.012	33.481	1722.75	1722.73	GM-AEJ-GM-AEJ|2	32938			2825.1968,2825.2379	GM-AEJA-GM-AEJA-GM-AEJGA (Anhydro) |3,GM-AEJA-GM-AEJA-GM-AEJK (Anhydro) |3	5532.3
546	11.003	35.311	1722.73	1722.73	GM-AEJ-GM-AEJ|2	44973			2845.223,2845.2641	GM-AEJA-GM-AEJA-GM-AEJGA|3,GM-AEJA-GM-AEJA-GM-AEJK|3	16090
1236	11.009	42.376	1722.72	1722.73	GM-AEJ-GM-AEJ|2	165280			3030.3594,3030.3234,3030.36	GM-AEJA-GM-AEJA-GM-AEJKW (Amidated) |3,GM-AEJA-GM-AEJA-GM-AEJQW (Amidated) |3,GM-AEJA-GM-AEJA-GM-AEJWE (Amidated) |3	7522.3
1224	11.104	31.757	1722.74	1722.73	GM-AEJ-GM-AEJ|2	20717			3031.3434,3031.3074,3031.344	GM-AEJA-GM-AEJA-GM-AEJKW|3,GM-AEJA-GM-AEJA-GM-AEJQW|3,GM-AEJA-GM-AEJA-GM-AEJWE|3	17308.4
767	13.242	33.007	921.375	921.381	GM-AEJA (Anhydro) |1	6529.9			2545.08	GM-AEJA-GM-AEJA-GM-AE|3	61798.5
766	13.232	21.493	921.361	921.381	GM-AEJA (Anhydro) |1	4301.1			3195.3622,3195.3622,3195.3622	GM-GM-AEJ-GM-AEJ-GM-AEJAA|3,GM-GM-AEJ-GM-AEJA-GM-AEJA|3,GM-GM-AEJA-GM-AEJA-GM-AEJ|3	11333.5
1793	13.076	39.293	921.363	921.381	GM-AEJA (Anhydro) |1	19932			3124.3251,3124.3251	GM-GM-AEJ-GM-AEJ-GM-AEJA|3,GM-GM-AEJ-GM-AEJA-GM-AEJ|3	162647
1798	13.105	56.24	921.396	921.381	GM-AEJA (Anhydro) |1	15068			3266.3993,3266.3993	GM-GM-AEJ-GM-AEJA-GM-AEJAA|3,GM-GM-AEJA-GM-AEJA-GM-AEJA|3	136564
391	9.187	76.046	1313.58	1313.5721,1313.5721	GM-AEJA-GM-AEJ (Amidase Product) |2,GM-AEJ-GM-AEJA (Amidase Product) |2	19810
392	9.188	73.904	1313.6	1313.5721,1313.5721	GM-AEJA-GM-AEJ (Amidase Product) |2,GM-AEJ-GM-AEJA (Amidase Product) |2	11902
390	9.297	78.187	1313.56	1313.5721,1313.5721	GM-AEJA-GM-AEJ (Amidase Product) |2,GM-AEJ-GM-AEJA (Amidase Product) |2	25137
389	9.394	69.622	1313.55	1313.5721,1313.5721	GM-AEJA-GM-AEJ (Amidase Product) |2,GM-AEJ-GM-AEJA (Amidase Product) |2	16624
1842	13.126	59.512	1773.73	1773.7413,1773.7413	GM-AEJA-GM-AEJ (Anhydro) |2,GM-AEJ-GM-AEJA (Anhydro) |2	14428
2053	14.052	43.121	1773.72	1773.7413,1773.7413	GM-AEJA-GM-AEJ (Anhydro) |2,GM-AEJ-GM-AEJA (Anhydro) |2	16916
1843	13.214	46.048	1773.71	1773.7413,1773.7413	GM-AEJA-GM-AEJ (Anhydro) |2,GM-AEJ-GM-AEJA (Anhydro) |2	7685.1
1912	13.057	55.993	1773.75	1773.7413,1773.7413	GM-AEJA-GM-AEJ (Anhydro) |2,GM-AEJ-GM-AEJA (Anhydro) |2	12723
1958	13.015	55.993	1773.77	1773.7413,1773.7413	GM-AEJA-GM-AEJ (Anhydro) |2,GM-AEJ-GM-AEJA (Anhydro) |2	8094.6
762	13.106	15.259	1773.75	1773.7413,1773.7413	GM-AEJA-GM-AEJ (Anhydro) |2,GM-AEJ-GM-AEJA (Anhydro) |2	3883.1
2040	14.078	62.942	1773.73	1773.7413,1773.7413	GM-AEJA-GM-AEJ (Anhydro) |2,GM-AEJ-GM-AEJA (Anhydro) |2	227440
2041	14.075	60.931	1773.75	1773.7413,1773.7413	GM-AEJA-GM-AEJ (Anhydro) |2,GM-AEJ-GM-AEJA (Anhydro) |2	202180
2042	14.062	56.834	1773.77	1773.7413,1773.7413	GM-AEJA-GM-AEJ (Anhydro) |2,GM-AEJ-GM-AEJA (Anhydro) |2	133390
829	14.087	45.018	1773.73	1773.7413,1773.7413	GM-AEJA-GM-AEJ (Anhydro) |2,GM-AEJ-GM-AEJA (Anhydro) |2	65114
830	14.081	45.018	1773.75	1773.7413,1773.7413	GM-AEJA-GM-AEJ (Anhydro) |2,GM-AEJ-GM-AEJA (Anhydro) |2	58251
831	14.081	39.5	1773.78	1773.7413,1773.7413	GM-AEJA-GM-AEJ (Anhydro) |2,GM-AEJ-GM-AEJA (Anhydro) |2	37541
834	14.054	39.5	1773.7	1773.7413,1773.7413	GM-AEJA-GM-AEJ (Anhydro) |2,GM-AEJ-GM-AEJA (Anhydro) |2	37129
2054	14.068	22.093	1773.78	1773.7413,1773.7413	GM-AEJA-GM-AEJ (Anhydro) |2,GM-AEJ-GM-AEJA (Anhydro) |2	4975.8
2046	14.096	52.948	1773.71	1773.7413,1773.7413	GM-AEJA-GM-AEJ (Anhydro) |2,GM-AEJ-GM-AEJA (Anhydro) |2	128840
2050	14.056	43.121	1773.74	1773.7413,1773.7413	GM-AEJA-GM-AEJ (Anhydro) |2,GM-AEJ-GM-AEJA (Anhydro) |2	23177
2051	14.058	39.5	1773.75	1773.7413,1773.7413	GM-AEJA-GM-AEJ (Anhydro) |2,GM-AEJ-GM-AEJA (Anhydro) |2	14825
761	13.103	23.926	1773.73	1773.7413,1773.7413	GM-AEJA-GM-AEJ (Anhydro) |2,GM-AEJ-GM-AEJA (Anhydro) |2	4482.2
2052	14.046	31.274	1773.77	1773.7413,1773.7413	GM-AEJA-GM-AEJ (Anhydro) |2,GM-AEJ-GM-AEJA (Anhydro) |2	8876.9
2049	14.062	39.452	1773.72	1773.7413,1773.7413	GM-AEJA-GM-AEJ (Anhydro) |2,GM-AEJ-GM-AEJA (Anhydro) |2	18618
2404	16.19	22.947	1753.67	1753.7151,1753.7151	GM-AEJA-GM-AEJ (Double Anhydro) |2,GM-AEJ-GM-AEJA (Double Anhydro) |2	5971.5
2421	16.21	34.82	1753.7	1753.7151,1753.7151	GM-AEJA-GM-AEJ (Double Anhydro) |2,GM-AEJ-GM-AEJA (Double Anhydro) |2	10695
1128	10.114	24.605	1384.59	1384.6092,1384.6092	GM-AEJA-GM-AEJA (Amidase Product) |2,GM-AEJ-GM-AEJAA (Amidase Product) |2	6645.3
1129	10.027	26.639	1384.6	1384.6092,1384.6092	GM-AEJA-GM-AEJA (Amidase Product) |2,GM-AEJ-GM-AEJAA (Amidase Product) |2	11908
1130	10.025	26.639	1384.61	1384.6092,1384.6092	GM-AEJA-GM-AEJA (Amidase Product) |2,GM-AEJ-GM-AEJAA (Amidase Product) |2	10508
1131	10.024	22.727	1384.62	1384.6092,1384.6092	GM-AEJA-GM-AEJA (Amidase Product) |2,GM-AEJ-GM-AEJAA (Amidase Product) |2	6807.1
2343	15.194	41.209	1384.61	1384.6092,1384.6092	GM-AEJA-GM-AEJA (Amidase Product) |2,GM-AEJ-GM-AEJAA (Amidase Product) |2	8194.5
2349	15.265	42.675	1384.58	1384.6092,1384.6092	GM-AEJA-GM-AEJA (Amidase Product) |2,GM-AEJ-GM-AEJAA (Amidase Product) |2	13869
2350	15.181	41.209	1384.59	1384.6092,1384.6092	GM-AEJA-GM-AEJA (Amidase Product) |2,GM-AEJ-GM-AEJAA (Amidase Product) |2	11680
450	10.027	28.759	1384.58	1384.6092,1384.6092	GM-AEJA-GM-AEJA (Amidase Product) |2,GM-AEJ-GM-AEJAA (Amidase Product) |2	16587
440	10.017	38.379	1384.58	1384.6092,1384.6092	GM-AEJA-GM-AEJA (Amidase Product) |2,GM-AEJ-GM-AEJAA (Amidase Product) |2	39788
449	9.988	30.786	1384.63	1384.6092,1384.6092	GM-AEJA-GM-AEJA (Amidase Product) |2,GM-AEJ-GM-AEJAA (Amidase Product) |2	14290
443	10.073	40.348	1384.63	1384.6092,1384.6092	GM-AEJA-GM-AEJA (Amidase Product) |2,GM-AEJ-GM-AEJAA (Amidase Product) |2	60013
442	10.074	42.331	1384.61	1384.6092,1384.6092	GM-AEJA-GM-AEJA (Amidase Product) |2,GM-AEJ-GM-AEJAA (Amidase Product) |2	91143
441	10.041	42.331	1384.59	1384.6092,1384.6092	GM-AEJA-GM-AEJA (Amidase Product) |2,GM-AEJ-GM-AEJAA (Amidase Product) |2	96273
451	9.999	34.416	1384.61	1384.6092,1384.6092	GM-AEJA-GM-AEJA (Amidase Product) |2,GM-AEJ-GM-AEJAA (Amidase Product) |2	20940
855	14.651	47.092	1844.74	1844.7784,1844.7784	GM-AEJA-GM-AEJA (Anhydro) |2,GM-AEJ-GM-AEJAA (Anhydro) |2	90841
856	14.648	50.403	1844.76	1844.7784,1844.7784,1844.7831	GM-AEJA-GM-AEJA (Anhydro) |2,GM-AEJ-GM-AEJAA (Anhydro) |2,GM-AEJ-GM-AEJSP (Deacetyl-Anhydro) |2	185850
1797	13.193	56.24	1844.75	1844.7784,1844.7784,1844.7831	GM-AEJA-GM-AEJA (Anhydro) |2,GM-AEJ-GM-AEJAA (Anhydro) |2,GM-AEJ-GM-AEJSP (Deacetyl-Anhydro) |2	15299
2137	14.612	40.105	1844.74	1844.7784,1844.7784,1844.7831	GM-AEJA-GM-AEJA (Anhydro) |2,GM-AEJ-GM-AEJAA (Anhydro) |2,GM-AEJ-GM-AEJSP (Deacetyl-Anhydro) |2	43592
2139	14.624	75.268	1844.77	1844.7784,1844.7784,1844.7831	GM-AEJA-GM-AEJA (Anhydro) |2,GM-AEJ-GM-AEJAA (Anhydro) |2,GM-AEJ-GM-AEJSP (Deacetyl-Anhydro) |2	153970
2138	14.624	52.137	1844.75	1844.7784,1844.7784,1844.7831	GM-AEJA-GM-AEJA (Anhydro) |2,GM-AEJ-GM-AEJAA (Anhydro) |2,GM-AEJ-GM-AEJSP (Deacetyl-Anhydro) |2	113200
1791	13.216	59.542	1844.77	1844.7784,1844.7784,1844.7831	GM-AEJA-GM-AEJA (Anhydro) |2,GM-AEJ-GM-AEJAA (Anhydro) |2,GM-AEJ-GM-AEJSP (Deacetyl-Anhydro) |2	16028
2096	14.625	91.636	1844.75	1844.7784,1844.7784,1844.7831	GM-AEJA-GM-AEJA (Anhydro) |2,GM-AEJ-GM-AEJAA (Anhydro) |2,GM-AEJ-GM-AEJSP (Deacetyl-Anhydro) |2	622140
857	14.629	50.403	1844.79	1844.7784,1844.7784,1844.8194,1844.8194,1844.8194,1844.7831	GM-AEJA-GM-AEJA (Anhydro) |2,GM-AEJ-GM-AEJAA (Anhydro) |2,GM-AEJA-GM-AEJI (Deacetyl-Anhydro) |2,GM-AEJA-GM-AEJL (Deacetyl-Anhydro) |2,GM-AEJ-GM-AEJIA (Deacetyl-Anhydro) |2,GM-AEJ-GM-AEJSP (Deacetyl-Anhydro) |2	162570
858	14.612	47.092	1844.81	1844.7784,1844.7784,1844.8194,1844.8194,1844.8194,1844.7831	GM-AEJA-GM-AEJA (Anhydro) |2,GM-AEJ-GM-AEJAA (Anhydro) |2,GM-AEJA-GM-AEJI (Deacetyl-Anhydro) |2,GM-AEJA-GM-AEJL (Deacetyl-Anhydro) |2,GM-AEJ-GM-AEJIA (Deacetyl-Anhydro) |2,GM-AEJ-GM-AEJSP (Deacetyl-Anhydro) |2	106430
2097	14.569	95.686	1844.81	1844.7784,1844.7784,1844.8194,1844.8194,1844.8194,1844.7831	GM-AEJA-GM-AEJA (Anhydro) |2,GM-AEJ-GM-AEJAA (Anhydro) |2,GM-AEJA-GM-AEJI (Deacetyl-Anhydro) |2,GM-AEJA-GM-AEJL (Deacetyl-Anhydro) |2,GM-AEJ-GM-AEJIA (Deacetyl-Anhydro) |2,GM-AEJ-GM-AEJSP (Deacetyl-Anhydro) |2	420900
1792	13.322	56.24	1844.79	1844.7784,1844.7784,1844.8194,1844.8194,1844.8194,1844.7831	GM-AEJA-GM-AEJA (Anhydro) |2,GM-AEJ-GM-AEJAA (Anhydro) |2,GM-AEJA-GM-AEJI (Deacetyl-Anhydro) |2,GM-AEJA-GM-AEJL (Deacetyl-Anhydro) |2,GM-AEJ-GM-AEJIA (Deacetyl-Anhydro) |2,GM-AEJ-GM-AEJSP (Deacetyl-Anhydro) |2	13783
2142	14.606	36.369	1844.82	1844.7784,1844.7784,1844.8194,1844.8194,1844.8194,1844.7831	GM-AEJA-GM-AEJA (Anhydro) |2,GM-AEJ-GM-AEJAA (Anhydro) |2,GM-AEJA-GM-AEJI (Deacetyl-Anhydro) |2,GM-AEJA-GM-AEJL (Deacetyl-Anhydro) |2,GM-AEJ-GM-AEJIA (Deacetyl-Anhydro) |2,GM-AEJ-GM-AEJSP (Deacetyl-Anhydro) |2	32262
2141	14.605	45.143	1844.8	1844.7784,1844.7784,1844.8194,1844.8194,1844.8194,1844.7831	GM-AEJA-GM-AEJA (Anhydro) |2,GM-AEJ-GM-AEJAA (Anhydro) |2,GM-AEJA-GM-AEJI (Deacetyl-Anhydro) |2,GM-AEJA-GM-AEJL (Deacetyl-Anhydro) |2,GM-AEJ-GM-AEJIA (Deacetyl-Anhydro) |2,GM-AEJ-GM-AEJSP (Deacetyl-Anhydro) |2	89872
2140	14.612	73.158	1844.78	1844.7784,1844.7784,1844.8194,1844.8194,1844.8194,1844.7831	GM-AEJA-GM-AEJA (Anhydro) |2,GM-AEJ-GM-AEJAA (Anhydro) |2,GM-AEJA-GM-AEJI (Deacetyl-Anhydro) |2,GM-AEJA-GM-AEJL (Deacetyl-Anhydro) |2,GM-AEJ-GM-AEJIA (Deacetyl-Anhydro) |2,GM-AEJ-GM-AEJSP (Deacetyl-Anhydro) |2	132810
1344	11.535	14.317	1822.83	1822.7941,1822.7941	GM-AEJA-GM-AEJA (Deacetyl) |2,GM-AEJ-GM-AEJAA (Deacetyl) |2	3943.8
1409	11.53	32.608	1822.79	1822.7941,1822.7941	GM-AEJA-GM-AEJA (Deacetyl) |2,GM-AEJ-GM-AEJAA (Deacetyl) |2	9606.1
1410	11.469	25.054	1822.81	1822.7941,1822.7941	GM-AEJA-GM-AEJA (Deacetyl) |2,GM-AEJ-GM-AEJAA (Deacetyl) |2	6113.1
1408	11.486	32.608	1822.77	1822.7941,1822.7941	GM-AEJA-GM-AEJA (Deacetyl) |2,GM-AEJ-GM-AEJAA (Deacetyl) |2	11632
1411	11.526	34.106	1822.75	1822.7941,1822.7941	GM-AEJA-GM-AEJA (Deacetyl) |2,GM-AEJ-GM-AEJAA (Deacetyl) |2	5743.1
2449	16.652	39.284	1824.78	1824.7522,1824.7522	GM-AEJA-GM-AEJA (Double Anhydro) |2,GM-AEJ-GM-AEJAA (Double Anhydro) |2	26017
1467	11.76	9.1	1824.71	1824.7522,1824.7522	GM-AEJA-GM-AEJA (Double Anhydro) |2,GM-AEJ-GM-AEJAA (Double Anhydro) |2	5126.8
2448	16.654	39.284	1824.76	1824.7522,1824.7522	GM-AEJA-GM-AEJA (Double Anhydro) |2,GM-AEJ-GM-AEJAA (Double Anhydro) |2	41485
2447	16.691	39.284	1824.72	1824.7522,1824.7522	GM-AEJA-GM-AEJA (Double Anhydro) |2,GM-AEJ-GM-AEJAA (Double Anhydro) |2	26055
2446	16.687	41.309	1824.74	1824.7522,1824.7522	GM-AEJA-GM-AEJA (Double Anhydro) |2,GM-AEJ-GM-AEJAA (Double Anhydro) |2	49763
2454	16.657	31.895	1824.72	1824.7522,1824.7522	GM-AEJA-GM-AEJA (Double Anhydro) |2,GM-AEJ-GM-AEJAA (Double Anhydro) |2	10059
2458	16.732	29.88	1824.79	1824.7522,1824.7522	GM-AEJA-GM-AEJA (Double Anhydro) |2,GM-AEJ-GM-AEJAA (Double Anhydro) |2	6370.3
2442	16.662	15.834	1824.75	1824.7522,1824.7522	GM-AEJA-GM-AEJA (Double Anhydro) |2,GM-AEJ-GM-AEJAA (Double Anhydro) |2	5811.1
2459	16.742	33.617	1824.77	1824.7522,1824.7522	GM-AEJA-GM-AEJA (Double Anhydro) |2,GM-AEJ-GM-AEJAA (Double Anhydro) |2	10926
2461	16.717	33.617	1824.74	1824.7522,1824.7522	GM-AEJA-GM-AEJA (Double Anhydro) |2,GM-AEJ-GM-AEJAA (Double Anhydro) |2	14035
2337	15.438	32.93	2800.1	2800.15	GM-AEJA-GM-AEJA-GM-AEJC (Anhydro) |3	8224.4
1889	13.286	11.139	2820.2	2820.18	GM-AEJA-GM-AEJA-GM-AEJC|3	11856.4
1909	13.204	17.664	2820.12	2820.18	GM-AEJA-GM-AEJA-GM-AEJC|3	10463
747	12.687	29.106	2364.99	2365.03	GM-AEJA-GM-AEJA-GM-AEJGA (Amidase Product) |3	7675.9
1765	12.764	33.009	2364.99	2365.03	GM-AEJA-GM-AEJA-GM-AEJGA (Amidase Product) |3	15558
1764	12.78	33.009	2364.97	2365.03	GM-AEJA-GM-AEJA-GM-AEJGA (Amidase Product) |3	24717
1766	12.783	29.106	2365.02	2365.0276,2365.0687	GM-AEJA-GM-AEJA-GM-AEJGA (Amidase Product) |3,GM-AEJA-GM-AEJA-GM-AEJK (Amidase Product) |3	9245.4
743	12.779	15.068	2365.02	2365.0276,2365.0687	GM-AEJA-GM-AEJA-GM-AEJGA (Amidase Product) |3,GM-AEJA-GM-AEJA-GM-AEJK (Amidase Product) |3	4896
2080	14.316	32.237	2825.22	2825.1968,2825.2379	GM-AEJA-GM-AEJA-GM-AEJGA (Anhydro) |3,GM-AEJA-GM-AEJA-GM-AEJK (Anhydro) |3	5532.3
1676	12.493	21.195	2845.26	2845.223,2845.2641	GM-AEJA-GM-AEJA-GM-AEJGA|3,GM-AEJA-GM-AEJA-GM-AEJK|3	7730.1
1675	12.495	24.704	2845.23	2845.223,2845.2641	GM-AEJA-GM-AEJA-GM-AEJGA|3,GM-AEJA-GM-AEJA-GM-AEJK|3	8359.9
1760	12.829	22.342	3030.34	3030.3594,3030.3234,3030.36	GM-AEJA-GM-AEJA-GM-AEJKW (Amidated) |3,GM-AEJA-GM-AEJA-GM-AEJQW (Amidated) |3,GM-AEJA-GM-AEJA-GM-AEJWE (Amidated) |3	7522.3
1758	12.854	27.998	3031.31	3031.3434,3031.3074,3031.344	GM-AEJA-GM-AEJA-GM-AEJKW|3,GM-AEJA-GM-AEJA-GM-AEJQW|3,GM-AEJA-GM-AEJA-GM-AEJWE|3	9310.6
1759	12.849	22.616	3031.28	3031.3434,3031.3074,3031.344	GM-AEJA-GM-AEJA-GM-AEJKW|3,GM-AEJA-GM-AEJA-GM-AEJQW|3,GM-AEJA-GM-AEJA-GM-AEJWE|3	7997.8
2475	16.777	39.271	2545.09	2545.08	GM-AEJA-GM-AEJA-GM-AE|3	10093
2476	16.761	27.907	2545.12	2545.08	GM-AEJA-GM-AEJA-GM-AE|3	5977
2477	16.761	39.271	2545.02	2545.08	GM-AEJA-GM-AEJA-GM-AE|3	9801.7
2474	16.768	43.272	2545.07	2545.08	GM-AEJA-GM-AEJA-GM-AE|3	14817
2491	16.793	33.308	2545.05	2545.08	GM-AEJA-GM-AEJA-GM-AE|3	6417.8
2473	16.766	45.28	2545.04	2545.08	GM-AEJA-GM-AEJA-GM-AE|3	14692
2202	14.756	29.931	1915.81	1915.8155,1915.8565,1915.8202	GM-AEJA-GM-AEJAA (Anhydro) |2,GM-AEJA-GM-AEJIA (Deacetyl-Anhydro) |2,GM-AEJA-GM-AEJSP (Deacetyl-Anhydro) |2	5649.7
2185	14.74	12.167	1915.83	1915.8155,1915.8565,1915.8202	GM-AEJA-GM-AEJAA (Anhydro) |2,GM-AEJA-GM-AEJIA (Deacetyl-Anhydro) |2,GM-AEJA-GM-AEJSP (Deacetyl-Anhydro) |2	5012.3
1641	12.355	25.405	1935.86	1935.8417,1935.8828,1935.8465	GM-AEJA-GM-AEJAA|2,GM-AEJA-GM-AEJIA (Deacetyl) |2,GM-AEJA-GM-AEJSP (Deacetyl) |2	7549
1642	12.389	30.263	1935.84	1935.8417,1935.8828,1935.8465	GM-AEJA-GM-AEJAA|2,GM-AEJA-GM-AEJIA (Deacetyl) |2,GM-AEJA-GM-AEJSP (Deacetyl) |2	10943
1654	12.351	19.733	1935.88	1935.8417,1935.8828,1935.8465	GM-AEJA-GM-AEJAA|2,GM-AEJA-GM-AEJIA (Deacetyl) |2,GM-AEJA-GM-AEJSP (Deacetyl) |2	4458.3
1640	12.353	45.461	1935.82	1935.8417,1935.8465	GM-AEJA-GM-AEJAA|2,GM-AEJA-GM-AEJSP (Deacetyl) |2	11460
683	12.024	52.141	1864.76	1864.8046,1864.8046	GM-AEJA-GM-AEJA|2,GM-AEJ-GM-AEJAA|2	123920
681	12.067	66.725	1864.78	1864.8046,1864.8046,1864.8094	GM-AEJA-GM-AEJA|2,GM-AEJ-GM-AEJAA|2,GM-AEJ-GM-AEJSP (Deacetyl) |2	235890
1522	12.117	40.281	1864.77	1864.8046,1864.8046,1864.8094	GM-AEJA-GM-AEJA|2,GM-AEJ-GM-AEJAA|2,GM-AEJ-GM-AEJSP (Deacetyl) |2	206440
1523	12.074	44.229	1864.8	1864.8046,1864.8046,1864.8094	GM-AEJA-GM-AEJA|2,GM-AEJ-GM-AEJAA|2,GM-AEJ-GM-AEJSP (Deacetyl) |2	387300
1624	12.06	42.247	1864.78	1864.8046,1864.8046,1864.8094	GM-AEJA-GM-AEJA|2,GM-AEJ-GM-AEJAA|2,GM-AEJ-GM-AEJSP (Deacetyl) |2	318570
679	12.042	65.036	1864.81	1864.8046,1864.8046,1864.8457,1864.8457,1864.8457,1864.8094	GM-AEJA-GM-AEJA|2,GM-AEJ-GM-AEJAA|2,GM-AEJA-GM-AEJI (Deacetyl) |2,GM-AEJA-GM-AEJL (Deacetyl) |2,GM-AEJ-GM-AEJIA (Deacetyl) |2,GM-AEJ-GM-AEJSP (Deacetyl) |2	320222
1524	12.149	44.229	1864.81	1864.8046,1864.8046,1864.8457,1864.8457,1864.8457,1864.8094	GM-AEJA-GM-AEJA|2,GM-AEJ-GM-AEJAA|2,GM-AEJA-GM-AEJI (Deacetyl) |2,GM-AEJA-GM-AEJL (Deacetyl) |2,GM-AEJ-GM-AEJIA (Deacetyl) |2,GM-AEJ-GM-AEJSP (Deacetyl) |2	286020
680	12.038	52.141	1864.83	1864.8046,1864.8046,1864.8457,1864.8457,1864.8457,1864.8094	GM-AEJA-GM-AEJA|2,GM-AEJ-GM-AEJAA|2,GM-AEJA-GM-AEJI (Deacetyl) |2,GM-AEJA-GM-AEJL (Deacetyl) |2,GM-AEJ-GM-AEJIA (Deacetyl) |2,GM-AEJ-GM-AEJSP (Deacetyl) |2	166630
2128	14.529	9.598	1854.73	1854.77	GM-AEJA-GM-AEJC (Deacetyl) |2	3452.9
1679	12.499	24.704	1896.8	1896.78	GM-AEJA-GM-AEJC|2	6697
1893	13.189	30.98	1896.8	1896.78	GM-AEJA-GM-AEJC|2	5176.4
1678	12.536	26.374	1896.78	1896.78	GM-AEJA-GM-AEJC|2	7749.2
1677	12.509	29.843	1896.76	1896.78	GM-AEJA-GM-AEJC|2	16324.3
1865	13.195	43.255	1896.76	1896.78	GM-AEJA-GM-AEJC|2	10487
2542	19.413	35.985	1920.79	1920.81	GM-AEJA-GM-AEJF (Anhydro) |2	8730.8
2541	19.409	31.08	1920.82	1920.814,1920.8421	GM-AEJA-GM-AEJF (Anhydro) |2,GM-AEJA-GM-AEJGA (Amidated) |2	8660.5
2540	19.41	37.117	1920.8	1920.814,1920.8421	GM-AEJA-GM-AEJF (Anhydro) |2,GM-AEJA-GM-AEJGA (Amidated) |2	12068
2538	19.402	6.311	1920.84	1920.814,1920.8421,1920.8832	GM-AEJA-GM-AEJF (Anhydro) |2,GM-AEJA-GM-AEJGA (Amidated) |2,GM-AEJA-GM-AEJK (Amidated) |2	4231.2
1700	12.449	30.263	2068.88	2068.9	GM-AEJA-GM-AEJFQ|2	10789
1701	12.435	21.063	2068.9	2068.9	GM-AEJA-GM-AEJFQ|2	6892.9
1665	12.437	7.122	2068.92	2068.9	GM-AEJA-GM-AEJFQ|2	4122.9
1699	12.438	39.859	2068.86	2068.9	GM-AEJA-GM-AEJFQ|2	15124
2531	17.437	58.46	1940.87	1940.84	GM-AEJA-GM-AEJF|2	11303
2522	17.352	67.466	1940.82	1940.84	GM-AEJA-GM-AEJF|2	38883
2529	17.424	64.192	1940.85	1940.84	GM-AEJA-GM-AEJF|2	16868
2526	17.423	56.505	1940.88	1940.84	GM-AEJA-GM-AEJF|2	8103.1
2533	17.372	58.46	1940.79	1940.84	GM-AEJA-GM-AEJF|2	12363
2534	17.357	64.192	1940.82	1940.84	GM-AEJA-GM-AEJF|2	21643
2525	17.424	62.387	1940.8	1940.84	GM-AEJA-GM-AEJF|2	14208
2523	17.377	64.192	1940.84	1940.84	GM-AEJA-GM-AEJF|2	24017
2524	17.41	60.601	1940.86	1940.84	GM-AEJA-GM-AEJF|2	13949
342	9.074	21.742	1370.58	1370.5935,1370.5936	GM-AEJA-GM-AEJG (Amidase Product) |2,GM-AEJ-GM-AEJGA (Amidase Product) |2	3844.1
2013	13.923	14.654	1830.74	1830.7627,1830.7628	GM-AEJA-GM-AEJG (Anhydro) |2,GM-AEJ-GM-AEJGA (Anhydro) |2	4533.7
1413	11.561	26.666	1830.81	1830.7627,1830.7628,1830.8039,1830.8034,1830.8038,1830.8034	GM-AEJA-GM-AEJG (Anhydro) |2,GM-AEJ-GM-AEJGA (Anhydro) |2,GM-AEJ-GM-AEJK (Anhydro) |2,GM-AEJA-GM-AEJV (Deacetyl-Anhydro) |2,GM-AEJ-GM-AEJLG (Deacetyl-Anhydro) |2,GM-AEJ-GM-AEJVA (Deacetyl-Anhydro) |2	6711.5
1870	13.214	33.079	1830.81	1830.7627,1830.7628,1830.8039,1830.8034,1830.8038,1830.8034	GM-AEJA-GM-AEJG (Anhydro) |2,GM-AEJ-GM-AEJGA (Anhydro) |2,GM-AEJ-GM-AEJK (Anhydro) |2,GM-AEJA-GM-AEJV (Deacetyl-Anhydro) |2,GM-AEJ-GM-AEJLG (Deacetyl-Anhydro) |2,GM-AEJ-GM-AEJVA (Deacetyl-Anhydro) |2	7859.9
1869	13.215	35.218	1830.79	1830.7627,1830.7628,1830.8039,1830.8034,1830.8038,1830.8034	GM-AEJA-GM-AEJG (Anhydro) |2,GM-AEJ-GM-AEJGA (Anhydro) |2,GM-AEJ-GM-AEJK (Anhydro) |2,GM-AEJA-GM-AEJV (Deacetyl-Anhydro) |2,GM-AEJ-GM-AEJLG (Deacetyl-Anhydro) |2,GM-AEJ-GM-AEJVA (Deacetyl-Anhydro) |2	8961.8
1452	11.52	26.666	1830.79	1830.7627,1830.7628,1830.8039,1830.8034,1830.8038,1830.8034	GM-AEJA-GM-AEJG (Anhydro) |2,GM-AEJ-GM-AEJGA (Anhydro) |2,GM-AEJ-GM-AEJK (Anhydro) |2,GM-AEJA-GM-AEJV (Deacetyl-Anhydro) |2,GM-AEJ-GM-AEJLG (Deacetyl-Anhydro) |2,GM-AEJ-GM-AEJVA (Deacetyl-Anhydro) |2	8721.6
1449	11.535	23.756	1830.77	1830.7627,1830.7628,1830.8039,1830.8034,1830.8038,1830.8034	GM-AEJA-GM-AEJG (Anhydro) |2,GM-AEJ-GM-AEJGA (Anhydro) |2,GM-AEJ-GM-AEJK (Anhydro) |2,GM-AEJA-GM-AEJV (Deacetyl-Anhydro) |2,GM-AEJ-GM-AEJLG (Deacetyl-Anhydro) |2,GM-AEJ-GM-AEJVA (Deacetyl-Anhydro) |2	7302.3
1855	13.189	31.447	1830.77	1830.7627,1830.7628,1830.8039,1830.8034,1830.8038,1830.8034	GM-AEJA-GM-AEJG (Anhydro) |2,GM-AEJ-GM-AEJGA (Anhydro) |2,GM-AEJ-GM-AEJK (Anhydro) |2,GM-AEJA-GM-AEJV (Deacetyl-Anhydro) |2,GM-AEJ-GM-AEJLG (Deacetyl-Anhydro) |2,GM-AEJ-GM-AEJVA (Deacetyl-Anhydro) |2	7308
458	10.407	19.387	1441.61	1441.63	GM-AEJA-GM-AEJGA (Amidase Product) |2	4705.9
1964	13.482	29.549	1901.77	1901.8	GM-AEJA-GM-AEJGA (Anhydro) |2	8074.9
1947	13.484	46.899	1901.84	1901.7999,1901.841,1901.8409,1901.8405	GM-AEJA-GM-AEJGA (Anhydro) |2,GM-AEJA-GM-AEJK (Anhydro) |2,GM-AEJA-GM-AEJLG (Deacetyl-Anhydro) |2,GM-AEJA-GM-AEJVA (Deacetyl-Anhydro) |2	76466
793	13.493	41.854	1901.84	1901.7999,1901.841,1901.8409,1901.8405	GM-AEJA-GM-AEJGA (Anhydro) |2,GM-AEJA-GM-AEJK (Anhydro) |2,GM-AEJA-GM-AEJLG (Deacetyl-Anhydro) |2,GM-AEJA-GM-AEJVA (Deacetyl-Anhydro) |2	42307
1949	13.48	43.189	1901.8	1901.7999,1901.841,1901.8409,1901.8405	GM-AEJA-GM-AEJGA (Anhydro) |2,GM-AEJA-GM-AEJK (Anhydro) |2,GM-AEJA-GM-AEJLG (Deacetyl-Anhydro) |2,GM-AEJA-GM-AEJVA (Deacetyl-Anhydro) |2	43964
792	13.469	43.189	1901.82	1901.7999,1901.841,1901.8409,1901.8405	GM-AEJA-GM-AEJGA (Anhydro) |2,GM-AEJA-GM-AEJK (Anhydro) |2,GM-AEJA-GM-AEJLG (Deacetyl-Anhydro) |2,GM-AEJA-GM-AEJVA (Deacetyl-Anhydro) |2	42306
1946	13.479	46.899	1901.82	1901.7999,1901.841,1901.8409,1901.8405	GM-AEJA-GM-AEJGA (Anhydro) |2,GM-AEJA-GM-AEJK (Anhydro) |2,GM-AEJA-GM-AEJLG (Deacetyl-Anhydro) |2,GM-AEJA-GM-AEJVA (Deacetyl-Anhydro) |2	83814
789	13.517	39.887	1901.79	1901.7999,1901.841,1901.8409,1901.8405	GM-AEJA-GM-AEJGA (Anhydro) |2,GM-AEJA-GM-AEJK (Anhydro) |2,GM-AEJA-GM-AEJLG (Deacetyl-Anhydro) |2,GM-AEJA-GM-AEJVA (Deacetyl-Anhydro) |2	19949
2351	15.44	34.621	1881.79	1881.7737,1881.8148	GM-AEJA-GM-AEJGA (Double Anhydro) |2,GM-AEJA-GM-AEJK (Double Anhydro) |2	10444
2362	15.38	37.428	1881.77	1881.7737,1881.8148	GM-AEJA-GM-AEJGA (Double Anhydro) |2,GM-AEJA-GM-AEJK (Double Anhydro) |2	7217.4
2363	15.464	23.294	1881.81	1881.7737,1881.8148	GM-AEJA-GM-AEJGA (Double Anhydro) |2,GM-AEJA-GM-AEJK (Double Anhydro) |2	9014
609	11.092	35.296	1921.86	1921.8261,1921.8672,1921.8672,1921.8668	GM-AEJA-GM-AEJGA|2,GM-AEJA-GM-AEJK|2,GM-AEJA-GM-AEJLG (Deacetyl) |2,GM-AEJA-GM-AEJVA (Deacetyl) |2	96149
1276	11.099	37.298	1921.86	1921.8261,1921.8672,1921.8672,1921.8668,1921.8099	GM-AEJA-GM-AEJGA|2,GM-AEJA-GM-AEJK|2,GM-AEJA-GM-AEJLG (Deacetyl) |2,GM-AEJA-GM-AEJVA (Deacetyl) |2,GM-AEJA-GM-AEJPA (Double Anhydro) |2	161790
1279	11.083	37.298	1921.84	1921.8261,1921.8672,1921.8672,1921.8668,1921.8099	GM-AEJA-GM-AEJGA|2,GM-AEJA-GM-AEJK|2,GM-AEJA-GM-AEJLG (Deacetyl) |2,GM-AEJA-GM-AEJVA (Deacetyl) |2,GM-AEJA-GM-AEJPA (Double Anhydro) |2	130010
581	11.086	35.296	1921.83	1921.8261,1921.8672,1921.8672,1921.8668,1921.8099	GM-AEJA-GM-AEJGA|2,GM-AEJA-GM-AEJK|2,GM-AEJA-GM-AEJLG (Deacetyl) |2,GM-AEJA-GM-AEJVA (Deacetyl) |2,GM-AEJA-GM-AEJPA (Double Anhydro) |2	80800
1278	11.066	33.522	1921.82	1921.8261,1921.8099	GM-AEJA-GM-AEJGA|2,GM-AEJA-GM-AEJPA (Double Anhydro) |2	46739
559	11.13	31.721	1921.81	1921.8261,1921.8099	GM-AEJA-GM-AEJGA|2,GM-AEJA-GM-AEJPA (Double Anhydro) |2	63766.2
1283	11.06	22.013	1921.8	1921.8261,1921.8099	GM-AEJA-GM-AEJGA|2,GM-AEJA-GM-AEJPA (Double Anhydro) |2	8177.6
532	10.756	31.703	1850.82	1850.7889,1850.789,1850.8301,1850.8297,1850.8301,1850.8297	GM-AEJA-GM-AEJG|2,GM-AEJ-GM-AEJGA|2,GM-AEJ-GM-AEJK|2,GM-AEJA-GM-AEJV (Deacetyl) |2,GM-AEJ-GM-AEJLG (Deacetyl) |2,GM-AEJ-GM-AEJVA (Deacetyl) |2	35471
1177	10.764	33.406	1850.83	1850.7889,1850.789,1850.8301,1850.8297,1850.8301,1850.8297	GM-AEJA-GM-AEJG|2,GM-AEJ-GM-AEJGA|2,GM-AEJ-GM-AEJK|2,GM-AEJA-GM-AEJV (Deacetyl) |2,GM-AEJ-GM-AEJLG (Deacetyl) |2,GM-AEJ-GM-AEJVA (Deacetyl) |2	56162
1301	11.236	20.043	1850.83	1850.7889,1850.789,1850.8301,1850.8297,1850.8301,1850.8297	GM-AEJA-GM-AEJG|2,GM-AEJ-GM-AEJGA|2,GM-AEJ-GM-AEJK|2,GM-AEJA-GM-AEJV (Deacetyl) |2,GM-AEJ-GM-AEJLG (Deacetyl) |2,GM-AEJ-GM-AEJVA (Deacetyl) |2	5030.2
1176	10.716	33.406	1850.81	1850.7889,1850.789,1850.8301,1850.8297,1850.8301,1850.8297,1850.7728	GM-AEJA-GM-AEJG|2,GM-AEJ-GM-AEJGA|2,GM-AEJ-GM-AEJK|2,GM-AEJA-GM-AEJV (Deacetyl) |2,GM-AEJ-GM-AEJLG (Deacetyl) |2,GM-AEJ-GM-AEJVA (Deacetyl) |2,GM-AEJ-GM-AEJPA (Double Anhydro) |2	61626
1179	10.667	31.703	1850.79	1850.7889,1850.789,1850.8301,1850.8297,1850.8301,1850.8297,1850.7728	GM-AEJA-GM-AEJG|2,GM-AEJ-GM-AEJGA|2,GM-AEJ-GM-AEJK|2,GM-AEJA-GM-AEJV (Deacetyl) |2,GM-AEJ-GM-AEJLG (Deacetyl) |2,GM-AEJ-GM-AEJVA (Deacetyl) |2,GM-AEJ-GM-AEJPA (Double Anhydro) |2	38330
608	11.242	10.263	1850.79	1850.7889,1850.789,1850.8301,1850.8297,1850.8301,1850.8297,1850.7728	GM-AEJA-GM-AEJG|2,GM-AEJ-GM-AEJGA|2,GM-AEJ-GM-AEJK|2,GM-AEJA-GM-AEJV (Deacetyl) |2,GM-AEJ-GM-AEJLG (Deacetyl) |2,GM-AEJ-GM-AEJVA (Deacetyl) |2,GM-AEJ-GM-AEJPA (Double Anhydro) |2	5222.5
1306	11.229	27.914	1850.81	1850.7889,1850.789,1850.8301,1850.8297,1850.8301,1850.8297,1850.7728	GM-AEJA-GM-AEJG|2,GM-AEJ-GM-AEJGA|2,GM-AEJ-GM-AEJK|2,GM-AEJA-GM-AEJV (Deacetyl) |2,GM-AEJ-GM-AEJLG (Deacetyl) |2,GM-AEJ-GM-AEJVA (Deacetyl) |2,GM-AEJ-GM-AEJPA (Double Anhydro) |2	7965.4
531	10.74	31.703	1850.8	1850.7889,1850.789,1850.8301,1850.8297,1850.8301,1850.8297,1850.7728	GM-AEJA-GM-AEJG|2,GM-AEJ-GM-AEJGA|2,GM-AEJ-GM-AEJK|2,GM-AEJA-GM-AEJV (Deacetyl) |2,GM-AEJ-GM-AEJLG (Deacetyl) |2,GM-AEJ-GM-AEJVA (Deacetyl) |2,GM-AEJ-GM-AEJPA (Double Anhydro) |2	31669
1305	11.23	31.813	1850.79	1850.7889,1850.789,1850.8301,1850.8297,1850.8301,1850.8297,1850.7728	GM-AEJA-GM-AEJG|2,GM-AEJ-GM-AEJGA|2,GM-AEJ-GM-AEJK|2,GM-AEJA-GM-AEJV (Deacetyl) |2,GM-AEJ-GM-AEJLG (Deacetyl) |2,GM-AEJ-GM-AEJVA (Deacetyl) |2,GM-AEJ-GM-AEJPA (Double Anhydro) |2	11591
1182	10.676	24.744	1850.77	1850.7889,1850.789,1850.7277,1850.7728	GM-AEJA-GM-AEJG|2,GM-AEJ-GM-AEJGA|2,Na+ GM-AEJ-GM (x2)|2,GM-AEJ-GM-AEJPA (Double Anhydro) |2	9103.3
1307	11.283	27.914	1850.75	1850.7889,1850.789,1850.7277,1850.7728	GM-AEJA-GM-AEJG|2,GM-AEJ-GM-AEJGA|2,Na+ GM-AEJ-GM (x2)|2,GM-AEJ-GM-AEJPA (Double Anhydro) |2	6035.1
1304	11.242	27.914	1850.77	1850.7889,1850.789,1850.7277,1850.7728	GM-AEJA-GM-AEJG|2,GM-AEJ-GM-AEJGA|2,Na+ GM-AEJ-GM (x2)|2,GM-AEJ-GM-AEJPA (Double Anhydro) |2	12558
518	10.675	26.139	1850.77	1850.7889,1850.789,1850.7277,1850.7728	GM-AEJA-GM-AEJG|2,GM-AEJ-GM-AEJGA|2,Na+ GM-AEJ-GM (x2)|2,GM-AEJ-GM-AEJPA (Double Anhydro) |2	25992
607	11.255	8.273	1850.77	1850.7889,1850.789,1850.7277,1850.7728	GM-AEJA-GM-AEJG|2,GM-AEJ-GM-AEJGA|2,Na+ GM-AEJ-GM (x2)|2,GM-AEJ-GM-AEJPA (Double Anhydro) |2	4457.7
1493	12.169	40.281	1886.85	1886.83,1886.83,1886.83	GM-AEJA-GM-AEJI (Anhydro) |2,GM-AEJA-GM-AEJL (Anhydro) |2,GM-AEJ-GM-AEJIA (Anhydro) |2	11481
1650	12.204	36.743	1886.87	1886.83,1886.83,1886.83	GM-AEJA-GM-AEJI (Anhydro) |2,GM-AEJA-GM-AEJL (Anhydro) |2,GM-AEJ-GM-AEJIA (Anhydro) |2	6471.2
688	12.039	48.695	1864.86	1864.8457,1864.8457,1864.8457	GM-AEJA-GM-AEJI (Deacetyl) |2,GM-AEJA-GM-AEJL (Deacetyl) |2,GM-AEJ-GM-AEJIA (Deacetyl) |2	98641
705	12.039	44.229	1864.89	1864.8457,1864.8457,1864.8457	GM-AEJA-GM-AEJI (Deacetyl) |2,GM-AEJA-GM-AEJL (Deacetyl) |2,GM-AEJ-GM-AEJIA (Deacetyl) |2	57522
2099	14.592	52.268	1844.85	1844.8194,1844.8194,1844.8194	GM-AEJA-GM-AEJI (Deacetyl-Anhydro) |2,GM-AEJA-GM-AEJL (Deacetyl-Anhydro) |2,GM-AEJ-GM-AEJIA (Deacetyl-Anhydro) |2	204020
2144	14.603	32.551	1844.84	1844.8194,1844.8194,1844.8194	GM-AEJA-GM-AEJI (Deacetyl-Anhydro) |2,GM-AEJA-GM-AEJL (Deacetyl-Anhydro) |2,GM-AEJ-GM-AEJIA (Deacetyl-Anhydro) |2	18310
859	14.611	47.092	1844.84	1844.8194,1844.8194,1844.8194	GM-AEJA-GM-AEJI (Deacetyl-Anhydro) |2,GM-AEJA-GM-AEJL (Deacetyl-Anhydro) |2,GM-AEJ-GM-AEJIA (Deacetyl-Anhydro) |2	66840
860	14.625	43.375	1844.86	1844.8194,1844.8194,1844.8194	GM-AEJA-GM-AEJI (Deacetyl-Anhydro) |2,GM-AEJA-GM-AEJL (Deacetyl-Anhydro) |2,GM-AEJ-GM-AEJIA (Deacetyl-Anhydro) |2	38642
2145	14.617	26.696	1844.85	1844.8194,1844.8194,1844.8194	GM-AEJA-GM-AEJI (Deacetyl-Anhydro) |2,GM-AEJA-GM-AEJL (Deacetyl-Anhydro) |2,GM-AEJ-GM-AEJIA (Deacetyl-Anhydro) |2	9988
2098	14.616	60.213	1844.83	1844.8194,1844.8194,1844.8194,1844.7831	GM-AEJA-GM-AEJI (Deacetyl-Anhydro) |2,GM-AEJA-GM-AEJL (Deacetyl-Anhydro) |2,GM-AEJ-GM-AEJIA (Deacetyl-Anhydro) |2,GM-AEJ-GM-AEJSP (Deacetyl-Anhydro) |2	284890
2502	17.072	31.616	1977.92	1977.89	GM-AEJA-GM-AEJIA|2	7966.7
2501	16.832	25.58	1977.94	1977.89	GM-AEJA-GM-AEJIA|2	5168.1
2517	17.298	8.569	1977.92	1977.89	GM-AEJA-GM-AEJIA|2	3798.5
2505	16.835	38.041	1977.92	1977.89	GM-AEJA-GM-AEJIA|2	8639.3
2514	16.928	42.326	1977.87	1977.8933,1977.857	GM-AEJA-GM-AEJIA|2,GM-AEJA-GM-AEJSP|2	10920
2512	16.843	42.326	1977.9	1977.8933,1977.857	GM-AEJA-GM-AEJIA|2,GM-AEJA-GM-AEJSP|2	12371
2511	16.835	48.268	1977.88	1977.8933,1977.857	GM-AEJA-GM-AEJIA|2,GM-AEJA-GM-AEJSP|2	18406
2499	16.977	38.041	1977.85	1977.8933,1977.857	GM-AEJA-GM-AEJIA|2,GM-AEJA-GM-AEJSP|2	10828
2498	17.017	44.47	1977.89	1977.8933,1977.857	GM-AEJA-GM-AEJIA|2,GM-AEJA-GM-AEJSP|2	19071.8
2403	16.136	38.839	1906.87	1906.8562,1906.8562,1906.8562	GM-AEJA-GM-AEJI|2,GM-AEJA-GM-AEJL|2,GM-AEJ-GM-AEJIA|2	8876.5
2411	16.279	33.067	1906.9	1906.8562,1906.8562,1906.8562	GM-AEJA-GM-AEJI|2,GM-AEJA-GM-AEJL|2,GM-AEJ-GM-AEJIA|2	5571.3
2399	16.21	25.017	1906.9	1906.8562,1906.8562,1906.8562	GM-AEJA-GM-AEJI|2,GM-AEJA-GM-AEJL|2,GM-AEJ-GM-AEJIA|2	13783
2410	16.232	38.839	1906.88	1906.8562,1906.8562,1906.8562	GM-AEJA-GM-AEJI|2,GM-AEJA-GM-AEJL|2,GM-AEJ-GM-AEJIA|2	8205.4
2407	16.193	44.972	1906.82	1906.8562,1906.8562,1906.8562,1906.8199	GM-AEJA-GM-AEJI|2,GM-AEJA-GM-AEJL|2,GM-AEJ-GM-AEJIA|2,GM-AEJ-GM-AEJSP|2	10851
2405	16.209	44.972	1906.85	1906.8562,1906.8562,1906.8562,1906.8199	GM-AEJA-GM-AEJI|2,GM-AEJA-GM-AEJL|2,GM-AEJ-GM-AEJIA|2,GM-AEJ-GM-AEJSP|2	12196
2408	16.188	57.148	1906.84	1906.8562,1906.8562,1906.8562,1906.8199	GM-AEJA-GM-AEJI|2,GM-AEJA-GM-AEJL|2,GM-AEJ-GM-AEJIA|2,GM-AEJ-GM-AEJSP|2	16404
2437	16.182	44.972	1906.82	1906.8562,1906.8562,1906.8562,1906.8199	GM-AEJA-GM-AEJI|2,GM-AEJA-GM-AEJL|2,GM-AEJ-GM-AEJIA|2,GM-AEJ-GM-AEJSP|2	10490
2409	16.19	55.007	1906.86	1906.8562,1906.8562,1906.8562,1906.8199	GM-AEJA-GM-AEJI|2,GM-AEJA-GM-AEJL|2,GM-AEJ-GM-AEJIA|2,GM-AEJ-GM-AEJSP|2	13297
794	13.472	38.552	1901.87	1901.841,1901.8409,1901.8405	GM-AEJA-GM-AEJK (Anhydro) |2,GM-AEJA-GM-AEJLG (Deacetyl-Anhydro) |2,GM-AEJA-GM-AEJVA (Deacetyl-Anhydro) |2	27081
1948	13.484	45.02	1901.86	1901.841,1901.8409,1901.8405	GM-AEJA-GM-AEJK (Anhydro) |2,GM-AEJA-GM-AEJLG (Deacetyl-Anhydro) |2,GM-AEJA-GM-AEJVA (Deacetyl-Anhydro) |2	49535
1950	13.486	40.038	1901.88	1901.841,1901.8409,1901.8405	GM-AEJA-GM-AEJK (Anhydro) |2,GM-AEJA-GM-AEJLG (Deacetyl-Anhydro) |2,GM-AEJA-GM-AEJVA (Deacetyl-Anhydro) |2	29665
2357	15.458	21.152	1881.84	1881.81	GM-AEJA-GM-AEJK (Double Anhydro) |2	6290.3
777	13.39	26.477	2057.96	2057.9374,2057.9409	GM-AEJA-GM-AEJKR (Anhydro) |2,GM-AEJA-GM-AEJRE (Anhydro) |2	5985.1
785	13.417	30.423	2057.94	2057.9374,2057.9409,2057.9046	GM-AEJA-GM-AEJKR (Anhydro) |2,GM-AEJA-GM-AEJRE (Anhydro) |2,GM-AEJA-GM-AEJRQ (Anhydro) |2	7699
784	13.389	30.423	2057.91	2057.9374,2057.9409,2057.9046	GM-AEJA-GM-AEJKR (Anhydro) |2,GM-AEJA-GM-AEJRE (Anhydro) |2,GM-AEJA-GM-AEJRQ (Anhydro) |2	8262.8
614	11.295	23.97	2077.99	2077.9636,2077.9671	GM-AEJA-GM-AEJKR|2,GM-AEJA-GM-AEJRE|2	10500
622	11.304	19.971	2078.02	2077.9636,2077.9671	GM-AEJA-GM-AEJKR|2,GM-AEJA-GM-AEJRE|2	7058.4
1325	11.321	19.971	2078	2077.9636,2077.9671	GM-AEJA-GM-AEJKR|2,GM-AEJA-GM-AEJRE|2	8260.7
1334	11.34	26.029	2077.93	2077.9636,2077.9671,2077.9308	GM-AEJA-GM-AEJKR|2,GM-AEJA-GM-AEJRE|2,GM-AEJA-GM-AEJRQ|2	14716
1320	11.318	26.029	2077.98	2077.9636,2077.9671,2077.9308	GM-AEJA-GM-AEJKR|2,GM-AEJA-GM-AEJRE|2,GM-AEJA-GM-AEJRQ|2	13604
615	11.295	26.029	2077.94	2077.9636,2077.9671,2077.9308	GM-AEJA-GM-AEJKR|2,GM-AEJA-GM-AEJRE|2,GM-AEJA-GM-AEJRQ|2	15173
623	11.295	26.029	2077.96	2077.9636,2077.9671,2077.9308	GM-AEJA-GM-AEJKR|2,GM-AEJA-GM-AEJRE|2,GM-AEJA-GM-AEJRQ|2	15797
1319	11.323	26.029	2077.95	2077.9636,2077.9671,2077.9308	GM-AEJA-GM-AEJKR|2,GM-AEJA-GM-AEJRE|2,GM-AEJA-GM-AEJRQ|2	17464
2026	13.844	30.29	2087.94	2087.9203,2087.9209	GM-AEJA-GM-AEJKW (Anhydro) |2,GM-AEJA-GM-AEJWE (Anhydro) |2	4997.9
1418	11.456	26.666	2108	2107.9465,2107.9471	GM-AEJA-GM-AEJKW|2,GM-AEJA-GM-AEJWE|2	10113
641	11.451	29.658	2107.97	2107.9465,2107.9471	GM-AEJA-GM-AEJKW|2,GM-AEJA-GM-AEJWE|2	13809
1423	11.525	29.658	2107.97	2107.9465,2107.9471	GM-AEJA-GM-AEJKW|2,GM-AEJA-GM-AEJWE|2	20467
644	11.451	26.666	2107.99	2107.9465,2107.9471	GM-AEJA-GM-AEJKW|2,GM-AEJA-GM-AEJWE|2	8260.7
1277	11.122	35.296	1921.88	1921.8672,1921.8672,1921.8668	GM-AEJA-GM-AEJK|2,GM-AEJA-GM-AEJLG (Deacetyl) |2,GM-AEJA-GM-AEJVA (Deacetyl) |2	122170
572	11.148	31.721	1921.91	1921.8672,1921.8672,1921.8668	GM-AEJA-GM-AEJK|2,GM-AEJA-GM-AEJLG (Deacetyl) |2,GM-AEJA-GM-AEJVA (Deacetyl) |2	62890.7
1280	11.132	35.296	1921.9	1921.8672,1921.8672,1921.8668	GM-AEJA-GM-AEJK|2,GM-AEJA-GM-AEJLG (Deacetyl) |2,GM-AEJA-GM-AEJVA (Deacetyl) |2	76430
582	11.133	33.495	1921.89	1921.8672,1921.8672,1921.8668	GM-AEJA-GM-AEJK|2,GM-AEJA-GM-AEJLG (Deacetyl) |2,GM-AEJA-GM-AEJVA (Deacetyl) |2	68804
2260	15.002	30.342	1963.85	1963.8777,1963.8773	GM-AEJA-GM-AEJLG|2,GM-AEJA-GM-AEJVA|2	6114.1
2240	15.033	24.457	1963.87	1963.8777,1963.8773	GM-AEJA-GM-AEJLG|2,GM-AEJA-GM-AEJVA|2	5709.4
1416	11.508	26.666	1904.83	1904.786,1904.786,1904.7861,1904.8046,1904.8312,1904.8672,1904.8678	GM-AEJA-GM-AEJM (Anhydro) |2,GM-AEJ-GM-AEJMA (Anhydro) |2,GM-AEJ-GM-AEJVC (Anhydro) |2,GM-AEJ-GM-AEJTT (Anhydro) |2,M-AEJA-GM-AEJQW|2,M-AEJA-GM-AEJKW|2,M-AEJA-GM-AEJWE|2	7497.4
1673	12.519	39.36	1882.77	1882.8017,1882.8017,1882.7835,1882.8018	GM-AEJA-GM-AEJM (Deacetyl) |2,GM-AEJ-GM-AEJMA (Deacetyl) |2,GM-AEJ-GM-AEJSD (Deacetyl) |2,GM-AEJ-GM-AEJVC (Deacetyl) |2	13623
1706	12.411	26.341	1882.81	1882.8017,1882.8017,1882.7835,1882.8018,1882.8203	GM-AEJA-GM-AEJM (Deacetyl) |2,GM-AEJ-GM-AEJMA (Deacetyl) |2,GM-AEJ-GM-AEJSD (Deacetyl) |2,GM-AEJ-GM-AEJVC (Deacetyl) |2,GM-AEJ-GM-AEJTT (Deacetyl) |2	5266.8
1674	12.519	35.174	1882.79	1882.8017,1882.8017,1882.7835,1882.8018,1882.8203	GM-AEJA-GM-AEJM (Deacetyl) |2,GM-AEJ-GM-AEJMA (Deacetyl) |2,GM-AEJ-GM-AEJSD (Deacetyl) |2,GM-AEJ-GM-AEJVC (Deacetyl) |2,GM-AEJ-GM-AEJTT (Deacetyl) |2	8470
1085	8.425	44.524	1882.83	1882.8017,1882.8017,1882.7835,1882.8018,1882.8203	GM-AEJA-GM-AEJM (Deacetyl) |2,GM-AEJ-GM-AEJMA (Deacetyl) |2,GM-AEJ-GM-AEJSD (Deacetyl) |2,GM-AEJ-GM-AEJVC (Deacetyl) |2,GM-AEJ-GM-AEJTT (Deacetyl) |2	33719
1324	11.251	27.064	1862.77	1862.7754,1862.7754,1862.7572,1862.7755,1862.794	GM-AEJA-GM-AEJM (Deacetyl-Anhydro) |2,GM-AEJ-GM-AEJMA (Deacetyl-Anhydro) |2,GM-AEJ-GM-AEJSD (Deacetyl-Anhydro) |2,GM-AEJ-GM-AEJVC (Deacetyl-Anhydro) |2,GM-AEJ-GM-AEJTT (Deacetyl-Anhydro) |2	7706.3
1322	11.243	28.864	1862.79	1862.7754,1862.7754,1862.7572,1862.7755,1862.794	GM-AEJA-GM-AEJM (Deacetyl-Anhydro) |2,GM-AEJ-GM-AEJMA (Deacetyl-Anhydro) |2,GM-AEJ-GM-AEJSD (Deacetyl-Anhydro) |2,GM-AEJ-GM-AEJVC (Deacetyl-Anhydro) |2,GM-AEJ-GM-AEJTT (Deacetyl-Anhydro) |2	8834.2
1323	11.242	28.864	1862.81	1862.7754,1862.7754,1862.7755,1862.794	GM-AEJA-GM-AEJM (Deacetyl-Anhydro) |2,GM-AEJ-GM-AEJMA (Deacetyl-Anhydro) |2,GM-AEJ-GM-AEJVC (Deacetyl-Anhydro) |2,GM-AEJ-GM-AEJTT (Deacetyl-Anhydro) |2	6758.7
587	11.151	22.147	1515.69	1515.6539,1515.654,1515.6725	GM-AEJA-GM-AEJMA (Amidase Product) |2,GM-AEJA-GM-AEJVC (Amidase Product) |2,GM-AEJA-GM-AEJTT (Amidase Product) |2	9531.2
1253	11.052	8.416	1975.79	1975.8231,1975.8049,1975.8232	GM-AEJA-GM-AEJMA (Anhydro) |2,GM-AEJA-GM-AEJSD (Anhydro) |2,GM-AEJA-GM-AEJVC (Anhydro) |2	4113.6
2242	14.942	34.238	1995.82	1995.8493,1995.8311,1995.8494,1995.8679	GM-AEJA-GM-AEJMA|2,GM-AEJA-GM-AEJSD|2,GM-AEJA-GM-AEJVC|2,GM-AEJA-GM-AEJTT|2	8958.8
2254	14.947	34.238	1995.84	1995.8493,1995.8311,1995.8494,1995.8679	GM-AEJA-GM-AEJMA|2,GM-AEJA-GM-AEJSD|2,GM-AEJA-GM-AEJVC|2,GM-AEJA-GM-AEJTT|2	8157.8
2253	14.9	28.554	1995.86	1995.8493,1995.8311,1995.8494,1995.8679	GM-AEJA-GM-AEJMA|2,GM-AEJA-GM-AEJSD|2,GM-AEJA-GM-AEJVC|2,GM-AEJA-GM-AEJTT|2	6450.4
2186	14.627	49.938	1924.78	1924.8122,1924.8122,1924.794,1924.8123	GM-AEJA-GM-AEJM|2,GM-AEJ-GM-AEJMA|2,GM-AEJ-GM-AEJSD|2,GM-AEJ-GM-AEJVC|2	9692
2187	14.586	49.938	1924.8	1924.8122,1924.8122,1924.794,1924.8123,1924.8308	GM-AEJA-GM-AEJM|2,GM-AEJ-GM-AEJMA|2,GM-AEJ-GM-AEJSD|2,GM-AEJ-GM-AEJVC|2,GM-AEJ-GM-AEJTT|2	13904
2189	14.573	40.254	1924.84	1924.8122,1924.8122,1924.794,1924.8123,1924.8308	GM-AEJA-GM-AEJM|2,GM-AEJ-GM-AEJMA|2,GM-AEJ-GM-AEJSD|2,GM-AEJ-GM-AEJVC|2,GM-AEJ-GM-AEJTT|2	5763.7
2188	14.651	49.938	1924.82	1924.8122,1924.8122,1924.794,1924.8123,1924.8308	GM-AEJA-GM-AEJM|2,GM-AEJ-GM-AEJMA|2,GM-AEJ-GM-AEJSD|2,GM-AEJ-GM-AEJVC|2,GM-AEJ-GM-AEJTT|2	9664.3
875	14.577	37.584	1924.81	1924.8122,1924.8122,1924.794,1924.8123,1924.8308	GM-AEJA-GM-AEJM|2,GM-AEJ-GM-AEJMA|2,GM-AEJ-GM-AEJSD|2,GM-AEJ-GM-AEJVC|2,GM-AEJ-GM-AEJTT|2	6871.7
1857	13.217	26.934	1941.86	1941.84	GM-AEJA-GM-AEJPA (Anhydro) |2	6163.4
1856	13.159	37.004	1941.88	1941.84	GM-AEJA-GM-AEJPA (Anhydro) |2	8713.2
592	11.112	36.597	1961.89	1961.86	GM-AEJA-GM-AEJPA|2	18830.2
1269	11.105	36.745	1961.9	1961.86	GM-AEJA-GM-AEJPA|2	19402
1268	11.107	33.426	1961.88	1961.86	GM-AEJA-GM-AEJPA|2	8997
2018	13.903	34.3	2087.86	2087.88	GM-AEJA-GM-AEJQW (Anhydro) |2	6457
816	13.804	48.229	2087.9	2087.8843,2087.9203,2087.9209	GM-AEJA-GM-AEJQW (Anhydro) |2,GM-AEJA-GM-AEJKW (Anhydro) |2,GM-AEJA-GM-AEJWE (Anhydro) |2	9955.9
2058	13.845	38.477	2087.92	2087.8843,2087.9203,2087.9209	GM-AEJA-GM-AEJQW (Anhydro) |2,GM-AEJA-GM-AEJKW (Anhydro) |2,GM-AEJA-GM-AEJWE (Anhydro) |2	8372.1
2059	13.832	56.648	2087.88	2087.8843,2087.9203,2087.9209	GM-AEJA-GM-AEJQW (Anhydro) |2,GM-AEJA-GM-AEJKW (Anhydro) |2,GM-AEJA-GM-AEJWE (Anhydro) |2	11215
828	13.712	48.229	2087.87	2087.8843,2087.9203,2087.9209	GM-AEJA-GM-AEJQW (Anhydro) |2,GM-AEJA-GM-AEJKW (Anhydro) |2,GM-AEJA-GM-AEJWE (Anhydro) |2	8802.5
2060	13.89	56.648	2087.9	2087.8843,2087.9203,2087.9209	GM-AEJA-GM-AEJQW (Anhydro) |2,GM-AEJA-GM-AEJKW (Anhydro) |2,GM-AEJA-GM-AEJWE (Anhydro) |2	10784
815	13.791	44.702	2087.93	2087.8843,2087.9203,2087.9209	GM-AEJA-GM-AEJQW (Anhydro) |2,GM-AEJA-GM-AEJKW (Anhydro) |2,GM-AEJA-GM-AEJWE (Anhydro) |2	7015
639	11.427	31.601	2107.89	2107.91	GM-AEJA-GM-AEJQW|2	19816.6
1422	11.527	31.601	2107.88	2107.91	GM-AEJA-GM-AEJQW|2	27606
640	11.488	31.601	2107.94	2107.9105,2107.9465,2107.9471	GM-AEJA-GM-AEJQW|2,GM-AEJA-GM-AEJKW|2,GM-AEJA-GM-AEJWE|2	17063
1421	11.523	31.601	2107.95	2107.9105,2107.9465,2107.9471	GM-AEJA-GM-AEJQW|2,GM-AEJA-GM-AEJKW|2,GM-AEJA-GM-AEJWE|2	35154
1419	11.561	58.982	2107.9	2107.9105,2107.9465,2107.9471	GM-AEJA-GM-AEJQW|2,GM-AEJA-GM-AEJKW|2,GM-AEJA-GM-AEJWE|2	50880
1785	13.026	15.101	2107.93	2107.9105,2107.9465,2107.9471	GM-AEJA-GM-AEJQW|2,GM-AEJA-GM-AEJKW|2,GM-AEJA-GM-AEJWE|2	3888.1
1420	11.516	53.909	2107.93	2107.9105,2107.9465,2107.9471	GM-AEJA-GM-AEJQW|2,GM-AEJA-GM-AEJKW|2,GM-AEJA-GM-AEJWE|2	52416
660	11.483	31.601	2107.91	2107.9105,2107.9465,2107.9471	GM-AEJA-GM-AEJQW|2,GM-AEJA-GM-AEJKW|2,GM-AEJA-GM-AEJWE|2	26612
1252	11.088	8.416	1975.76	1975.8	GM-AEJA-GM-AEJSD (Anhydro) |2	5310.1
588	11.151	22.147	1515.71	1515.67	GM-AEJA-GM-AEJTT (Amidase Product) |2	8281.8
1602	11.971	31.508	1872.86	1872.814,1872.8144,1872.814	GM-AEJA-GM-AEJV (Anhydro) |2,GM-AEJ-GM-AEJLG (Anhydro) |2,GM-AEJ-GM-AEJVA (Anhydro) |2	6112.6
2127	14.611	28.355	1852.81	1852.7878,1852.7882,1852.7878	GM-AEJA-GM-AEJV (Double Anhydro) |2,GM-AEJ-GM-AEJLG (Double Anhydro) |2,GM-AEJ-GM-AEJVA (Double Anhydro) |2	5148
2118	14.542	38.35	1852.79	1852.7878,1852.7882,1852.7878	GM-AEJA-GM-AEJV (Double Anhydro) |2,GM-AEJ-GM-AEJLG (Double Anhydro) |2,GM-AEJ-GM-AEJVA (Double Anhydro) |2	7980.3
2117	14.566	41.682	1852.77	1852.7878,1852.7882,1852.7878	GM-AEJA-GM-AEJV (Double Anhydro) |2,GM-AEJ-GM-AEJLG (Double Anhydro) |2,GM-AEJ-GM-AEJVA (Double Anhydro) |2	12409
2175	14.625	13.762	1852.75	1852.7878,1852.7882,1852.7878	GM-AEJA-GM-AEJV (Double Anhydro) |2,GM-AEJ-GM-AEJLG (Double Anhydro) |2,GM-AEJ-GM-AEJVA (Double Anhydro) |2	4547.2
2156	14.625	9.992	1852.77	1852.7878,1852.7882,1852.7878	GM-AEJA-GM-AEJV (Double Anhydro) |2,GM-AEJ-GM-AEJLG (Double Anhydro) |2,GM-AEJ-GM-AEJVA (Double Anhydro) |2	4196.8
2113	14.554	41.682	1852.75	1852.7878,1852.7882,1852.7878	GM-AEJA-GM-AEJV (Double Anhydro) |2,GM-AEJ-GM-AEJLG (Double Anhydro) |2,GM-AEJ-GM-AEJVA (Double Anhydro) |2	14147
2184	14.544	29.822	1892.81	1892.8402,1892.8406,1892.8402	GM-AEJA-GM-AEJV|2,GM-AEJ-GM-AEJLG|2,GM-AEJ-GM-AEJVA|2	6508.9
2155	14.543	27.811	1892.84	1892.8402,1892.8406,1892.8402	GM-AEJA-GM-AEJV|2,GM-AEJ-GM-AEJLG|2,GM-AEJ-GM-AEJVA|2	6406.4
2154	14.543	11.645	1892.86	1892.8402,1892.8406,1892.8402	GM-AEJA-GM-AEJV|2,GM-AEJ-GM-AEJLG|2,GM-AEJ-GM-AEJVA|2	4600.5
1643	12.383	30.263	1936.81	1936.81	GM-AEJA-GM-AEJY (Anhydro) |2	4913.8
2504	17.079	19.776	1936.79	1936.81	GM-AEJA-GM-AEJY (Anhydro) |2	5569.4
2252	14.949	30.495	1956.84	1956.83	GM-AEJA-GM-AEJY|2	8547.2
2206	14.911	42.55	1956.81	1956.83	GM-AEJA-GM-AEJY|2	16824
2207	14.955	32.543	1956.79	1956.83	GM-AEJA-GM-AEJY|2	7095.2
2208	14.923	44.464	1956.83	1956.83	GM-AEJA-GM-AEJY|2	17713
2209	14.922	40.497	1956.85	1956.83	GM-AEJA-GM-AEJY|2	12116
2205	14.952	21.385	1956.87	1956.83	GM-AEJA-GM-AEJY|2	10761.1
2244	14.936	34.238	1956.82	1956.83	GM-AEJA-GM-AEJY|2	9064.4
2210	14.906	32.543	1956.87	1956.83	GM-AEJA-GM-AEJY|2	7748.5
1374	11.522	58.143	1793.78	1793.7675,1793.7675	GM-AEJA-GM-AEJ|2,GM-AEJ-GM-AEJA|2	658380
1670	12.395	16.324	1793.8	1793.7675,1793.7675	GM-AEJA-GM-AEJ|2,GM-AEJ-GM-AEJA|2	4573.9
1346	11.536	48.359	1793.74	1793.7675,1793.7675	GM-AEJA-GM-AEJ|2,GM-AEJ-GM-AEJA|2	159713
1347	11.54	44.536	1793.73	1793.7675,1793.7675	GM-AEJA-GM-AEJ|2,GM-AEJ-GM-AEJA|2	50561
1375	11.537	56.074	1793.8	1793.7675,1793.7675	GM-AEJA-GM-AEJ|2,GM-AEJ-GM-AEJA|2	398670
1348	11.531	50.429	1793.76	1793.7675,1793.7675	GM-AEJA-GM-AEJ|2,GM-AEJ-GM-AEJA|2	168540
1349	11.518	50.429	1793.77	1793.7675,1793.7675	GM-AEJA-GM-AEJ|2,GM-AEJ-GM-AEJA|2	153080
1690	12.435	31.977	1793.74	1793.7675,1793.7675	GM-AEJA-GM-AEJ|2,GM-AEJ-GM-AEJA|2	8641.1
1693	12.451	30.263	1793.78	1793.7675,1793.7675	GM-AEJA-GM-AEJ|2,GM-AEJ-GM-AEJA|2	8096.2
1350	11.53	46.266	1793.78	1793.7675,1793.7675	GM-AEJA-GM-AEJ|2,GM-AEJ-GM-AEJA|2	103990
1351	11.518	42.448	1793.8	1793.7675,1793.7675	GM-AEJA-GM-AEJ|2,GM-AEJ-GM-AEJA|2	66054
1372	11.541	60.261	1793.74	1793.7675,1793.7675	GM-AEJA-GM-AEJ|2,GM-AEJ-GM-AEJA|2	761170
1691	12.412	31.977	1793.76	1793.7675,1793.7675	GM-AEJA-GM-AEJ|2,GM-AEJ-GM-AEJA|2	8482.1
1373	11.538	64.172	1793.76	1793.7675,1793.7675	GM-AEJA-GM-AEJ|2,GM-AEJ-GM-AEJA|2	943720
2445	16.699	19.616	1621.69	1621.68	GM-AEJA-GM-AE|2	3322.2
2443	16.606	19.616	1621.65	1621.68	GM-AEJA-GM-AE|2	4915.9
2444	16.612	23.792	1621.67	1621.68	GM-AEJA-GM-AE|2	5397.3
414	9.492	35.322	1012.42	1012.44	GM-AEJAA|1	13005.9
417	9.537	37.463	1012.46	1012.4448,1012.4859,1012.4496	GM-AEJAA|1,GM-AEJIA (Deacetyl) |1,GM-AEJSP (Deacetyl) |1	8582.4
416	9.492	41.726	1012.45	1012.4448,1012.4496	GM-AEJAA|1,GM-AEJSP (Deacetyl) |1	14600
1121	9.414	31.289	1012.43	1012.4448,1012.4496	GM-AEJAA|1,GM-AEJSP (Deacetyl) |1	6733.1
1119	9.432	39.605	1012.44	1012.4448,1012.4496	GM-AEJAA|1,GM-AEJSP (Deacetyl) |1	15003
415	9.492	41.726	1012.43	1012.4448,1012.4496	GM-AEJAA|1,GM-AEJSP (Deacetyl) |1	16125
1120	9.432	35.571	1012.46	1012.4448,1012.4496	GM-AEJAA|1,GM-AEJSP (Deacetyl) |1	10334
1118	9.449	39.605	1012.43	1012.4448,1012.4496	GM-AEJAA|1,GM-AEJSP (Deacetyl) |1	13490
1138	10.464	41.101	941.397	941.408	GM-AEJA|1	11929
1140	10.435	34.248	941.417	941.408	GM-AEJA|1	8291.4
485	10.374	30.929	941.395	941.408	GM-AEJA|1	16752.2
1139	10.435	41.101	941.407	941.408	GM-AEJA|1	12870
1023	8.456	94.515	941.386	941.408	GM-AEJA|1	861440
486	10.478	28.789	941.41	941.408	GM-AEJA|1	6293.1
277	8.417	114.702	941.395	941.408	GM-AEJA|1	447934
278	8.409	110.78	941.409	941.408	GM-AEJA|1	481900
280	8.429	102.76	941.425	941.4077,941.4488,941.4488	GM-AEJA|1,GM-AEJI (Deacetyl) |1,GM-AEJL (Deacetyl) |1	290170
1141	10.435	28.789	941.428	941.4077,941.4488,941.4488	GM-AEJA|1,GM-AEJI (Deacetyl) |1,GM-AEJL (Deacetyl) |1	4741.3
1123	9.492	33.875	973.376	973.384	GM-AEJC|1	6635.6
423	9.481	34.13	973.379	973.384	GM-AEJC|1	6371.1
422	9.541	32.009	973.365	973.384	GM-AEJC|1	5759.7
1122	9.43	29.592	973.365	973.384	GM-AEJC|1	4838.5
1124	9.437	31.733	973.387	973.384	GM-AEJC|1	4635.1
2536	18.473	47.002	1056.43	1056.4394,1056.4398,1056.4553	GM-AEJDA|1,GM-AEJEG|1,GM-AEJW|1	7541
2537	18.475	48.638	1056.45	1056.4394,1056.4398,1056.4553,1056.4753	GM-AEJDA|1,GM-AEJEG|1,GM-AEJW|1,GM-AEJVS|1	7181.5
356	9.195	12.023	1145.5	1145.5	GM-AEJFQ|1	3090.6
2513	16.835	53.942	1017.44	1017.44	GM-AEJF|1	36626
2393	16.142	37.053	1017.43	1017.44	GM-AEJF|1	18376
2394	16.183	33.357	1017.44	1017.44	GM-AEJF|1	23882.1
2395	16.162	33.357	1017.45	1017.44	GM-AEJF|1	11172
2483	16.717	51.798	1017.44	1017.44	GM-AEJF|1	30071
2482	16.702	53.942	1017.43	1017.44	GM-AEJF|1	33284
2507	16.726	52.09	1017.42	1017.44	GM-AEJF|1	31881
2392	16.079	33.357	1017.42	1017.44	GM-AEJF|1	17513.2
2485	16.692	47.514	1017.46	1017.44	GM-AEJF|1	10714
2516	16.056	35.209	1017.46	1017.44	GM-AEJF|1	14461
2418	16.087	37.351	1017.42	1017.44	GM-AEJF|1	21710
2419	16.066	37.351	1017.44	1017.44	GM-AEJF|1	23453
2508	16.896	53.942	1017.45	1017.44	GM-AEJF|1	21925
2484	16.715	51.798	1017.45	1017.44	GM-AEJF|1	18655
2396	16.115	33.357	1017.46	1017.44	GM-AEJF|1	6242.4
2481	16.754	49.656	1017.42	1017.44	GM-AEJF|1	27141
1453	11.67	24.915	978.418	978.403	GM-AEJGA (Anhydro) |1	4261
985	8.075	19.587	998.413	998.429	GM-AEJGA|1	9297.5
963	6.507	83.249	998.437	998.429	GM-AEJGA|1	26756
986	8.075	9.847	998.43	998.429	GM-AEJGA|1	3271.5
123	6.462	112.498	998.438	998.429	GM-AEJGA|1	140450
128	6.425	72.811	998.423	998.429	GM-AEJGA|1	10428
408	9.402	23.044	998.452	998.4292,998.4703,998.4703,998.4699	GM-AEJGA|1,GM-AEJK|1,GM-AEJLG (Deacetyl) |1,GM-AEJVA (Deacetyl) |1	4686.9
121	6.471	126.6	998.452	998.4292,998.4703,998.4703,998.4699	GM-AEJGA|1,GM-AEJK|1,GM-AEJLG (Deacetyl) |1,GM-AEJVA (Deacetyl) |1	412691
959	6.483	93.033	998.447	998.4292,998.4703,998.4703,998.4699	GM-AEJGA|1,GM-AEJK|1,GM-AEJLG (Deacetyl) |1,GM-AEJVA (Deacetyl) |1	120940
2203	14.701	47.385	983.429	983.429	GM-AEJGG (Amidated) |1	8575.5
1265	11.074	22.601	984.406	984.413	GM-AEJGG|1	4287.9
957	6.178	92.832	927.397	927.392	GM-AEJG|1	12842
956	6.172	96.553	927.387	927.392	GM-AEJG|1	17369
955	6.232	75.6	927.378	927.392	GM-AEJG|1	13110
119	5.781	93.979	927.39	927.392	GM-AEJG|1	18621.3
958	6.103	82.315	927.407	927.392	GM-AEJG|1	8483.5
120	5.812	92.331	927.375	927.392	GM-AEJG|1	10888
136	5.762	86.327	927.405	927.392	GM-AEJG|1	11283
319	8.408	55.411	963.422	963.4331,963.4331	GM-AEJI (Anhydro) |1,GM-AEJL (Anhydro) |1	6707.9
282	8.405	65.645	941.455	941.4488,941.4488	GM-AEJI (Deacetyl) |1,GM-AEJL (Deacetyl) |1	121150
283	8.423	59.393	941.47	941.4488,941.4488	GM-AEJI (Deacetyl) |1,GM-AEJL (Deacetyl) |1	65985
281	8.399	67.689	941.441	941.4488,941.4488	GM-AEJI (Deacetyl) |1,GM-AEJL (Deacetyl) |1	160550
1796	13.185	45.059	921.407	921.4225,921.4225	GM-AEJI (Deacetyl-Anhydro) |1,GM-AEJL (Deacetyl-Anhydro) |1	8813.1
2432	16.382	44.684	1054.51	1054.5	GM-AEJIA|1	14534
2431	16.361	50.885	1054.49	1054.5	GM-AEJIA|1	22721
2428	16.26	44.684	1054.5	1054.5	GM-AEJIA|1	8506.1
2427	16.259	46.726	1054.49	1054.5	GM-AEJIA|1	10545
2430	16.362	48.859	1054.48	1054.4964,1054.4601	GM-AEJIA|1,GM-AEJSP|1	21985
2425	16.227	42.675	1054.47	1054.4964,1054.4601	GM-AEJIA|1,GM-AEJSP|1	12414.4
2426	16.358	48.859	1054.48	1054.4964,1054.4601	GM-AEJIA|1,GM-AEJSP|1	10395
2180	14.599	41.682	983.481	983.4593,983.4593	GM-AEJI|1,GM-AEJL|1	9753
2179	14.596	52.888	983.471	983.4593,983.4593	GM-AEJI|1,GM-AEJL|1	16316
2178	14.575	54.58	983.46	983.4593,983.4593	GM-AEJI|1,GM-AEJL|1	27206
2228	14.486	47.385	983.475	983.4593,983.4593	GM-AEJI|1,GM-AEJL|1	10612
874	14.488	51.269	983.459	983.4593,983.4593	GM-AEJI|1,GM-AEJL|1	25214.9
2229	14.537	54.58	983.444	983.4593,983.4593,983.4295	GM-AEJI|1,GM-AEJL|1,GM-AEJGG (Amidated) |1	20498
2177	14.578	54.58	983.45	983.4593,983.4593,983.4295	GM-AEJI|1,GM-AEJL|1,GM-AEJGG (Amidated) |1	36329
2176	14.625	54.58	983.439	983.4593,983.4593,983.4295	GM-AEJI|1,GM-AEJL|1,GM-AEJGG (Amidated) |1	29297
1455	11.721	29.912	978.439	978.4441,978.444,978.4436	GM-AEJK (Anhydro) |1,GM-AEJLG (Deacetyl-Anhydro) |1,GM-AEJVA (Deacetyl-Anhydro) |1	10095
1456	11.69	28.111	978.449	978.4441,978.444,978.4436	GM-AEJK (Anhydro) |1,GM-AEJLG (Deacetyl-Anhydro) |1,GM-AEJVA (Deacetyl-Anhydro) |1	5720.8
1454	11.717	29.912	978.428	978.4441,978.444,978.4436	GM-AEJK (Anhydro) |1,GM-AEJLG (Deacetyl-Anhydro) |1,GM-AEJVA (Deacetyl-Anhydro) |1	8695.1
662	11.579	29.912	978.446	978.4441,978.444,978.4436	GM-AEJK (Anhydro) |1,GM-AEJLG (Deacetyl-Anhydro) |1,GM-AEJVA (Deacetyl-Anhydro) |1	10009
661	11.587	29.912	978.431	978.4441,978.444,978.4436	GM-AEJK (Anhydro) |1,GM-AEJLG (Deacetyl-Anhydro) |1,GM-AEJVA (Deacetyl-Anhydro) |1	11392
216	8	32.255	1154.59	1154.5667,1154.5702	GM-AEJKR|1,GM-AEJRE|1	18086
215	8.001	36.303	1154.57	1154.5667,1154.5702	GM-AEJKR|1,GM-AEJRE|1	28983
192	7.915	22.735	1154.57	1154.5667,1154.5702	GM-AEJKR|1,GM-AEJRE|1	11590
193	7.915	22.735	1154.59	1154.5667,1154.5702	GM-AEJKR|1,GM-AEJRE|1	7295.3
978	7.958	26.722	1154.57	1154.5667,1154.5702	GM-AEJKR|1,GM-AEJRE|1	8147.7
977	7.969	26.722	1154.56	1154.5667,1154.5702,1154.5339	GM-AEJKR|1,GM-AEJRE|1,GM-AEJRQ|1	9795.8
213	7.925	34.162	1154.56	1154.5667,1154.5702,1154.5339	GM-AEJKR|1,GM-AEJRE|1,GM-AEJRQ|1	31849
976	7.983	24.77	1154.55	1154.5667,1154.5702,1154.5339	GM-AEJKR|1,GM-AEJRE|1,GM-AEJRQ|1	7461.6
191	7.915	22.735	1154.55	1154.5667,1154.5702,1154.5339	GM-AEJKR|1,GM-AEJRE|1,GM-AEJRQ|1	33717.5
214	7.943	30.577	1154.54	1154.5667,1154.5339	GM-AEJKR|1,GM-AEJRQ|1	13402
370	9.246	33.341	1184.54	1184.5496,1184.5136,1184.5502	GM-AEJKW|1,GM-AEJQW|1,GM-AEJWE|1	13024
369	9.245	39.228	1184.52	1184.5496,1184.5136,1184.5502	GM-AEJKW|1,GM-AEJQW|1,GM-AEJWE|1	16985
1115	9.276	25.717	1184.53	1184.5496,1184.5136,1184.5502	GM-AEJKW|1,GM-AEJQW|1,GM-AEJWE|1	5838.5
372	9.256	31.526	1184.56	1184.5496,1184.5502	GM-AEJKW|1,GM-AEJWE|1	7910
964	6.444	91.074	998.49	998.4703,998.4703,998.4699	GM-AEJK|1,GM-AEJLG (Deacetyl) |1,GM-AEJVA (Deacetyl) |1	76551
962	6.443	95.006	998.479	998.4703,998.4703,998.4699	GM-AEJK|1,GM-AEJLG (Deacetyl) |1,GM-AEJVA (Deacetyl) |1	123480
961	6.452	103.712	998.468	998.4703,998.4703,998.4699	GM-AEJK|1,GM-AEJLG (Deacetyl) |1,GM-AEJVA (Deacetyl) |1	166860
960	6.479	101.829	998.457	998.4703,998.4703,998.4699	GM-AEJK|1,GM-AEJLG (Deacetyl) |1,GM-AEJVA (Deacetyl) |1	186920
124	6.449	126.095	998.483	998.4703,998.4703,998.4699	GM-AEJK|1,GM-AEJLG (Deacetyl) |1,GM-AEJVA (Deacetyl) |1	257310
122	6.451	128.237	998.467	998.4703,998.4703,998.4699	GM-AEJK|1,GM-AEJLG (Deacetyl) |1,GM-AEJVA (Deacetyl) |1	406790
407	9.366	23.044	998.467	998.4703,998.4703,998.4699	GM-AEJK|1,GM-AEJLG (Deacetyl) |1,GM-AEJVA (Deacetyl) |1	5548.9
1932	13.283	41.362	1040.46	1040.4808,1040.4804	GM-AEJLG|1,GM-AEJVA|1	9159.2
1934	13.222	39.417	1040.47	1040.4808,1040.4804	GM-AEJLG|1,GM-AEJVA|1	10977
1935	13.293	39.417	1040.48	1040.4808,1040.4804	GM-AEJLG|1,GM-AEJVA|1	7227.7
787	13.325	41.362	1040.48	1040.4808,1040.4804	GM-AEJLG|1,GM-AEJVA|1	8011.4
786	13.265	37.416	1040.46	1040.4808,1040.4804	GM-AEJLG|1,GM-AEJVA|1	8587
1837	13.533	40.855	1072.43	1072.4524,1072.4342,1072.4525	GM-AEJMA|1,GM-AEJSD|1,GM-AEJVC|1	14549
795	13.68	43.548	1072.43	1072.4524,1072.4342,1072.4525	GM-AEJMA|1,GM-AEJSD|1,GM-AEJVC|1	17578
1841	13.196	11.113	1072.46	1072.4524,1072.4342,1072.4525,1072.471	GM-AEJMA|1,GM-AEJSD|1,GM-AEJVC|1,GM-AEJTT|1	5337.9
1838	13.48	42.958	1072.44	1072.4524,1072.4342,1072.4525,1072.471	GM-AEJMA|1,GM-AEJSD|1,GM-AEJVC|1,GM-AEJTT|1	18148
796	13.527	45.076	1072.45	1072.4524,1072.4342,1072.4525,1072.471	GM-AEJMA|1,GM-AEJSD|1,GM-AEJVC|1,GM-AEJTT|1	15393
797	13.503	44.414	1072.47	1072.4524,1072.4525,1072.471	GM-AEJMA|1,GM-AEJVC|1,GM-AEJTT|1	10387
1680	12.388	44.545	1001.4	1001.42	GM-AEJM|1	15608
1887	13.099	37.191	1001.4	1001.42	GM-AEJM|1	6464.4
1682	12.3	37.555	1001.39	1001.42	GM-AEJM|1	7921.9
724	12.48	37.555	1001.41	1001.42	GM-AEJM|1	8404.7
723	12.506	33.368	1001.4	1001.42	GM-AEJM|1	8047.2
1683	12.398	39.36	1001.42	1001.42	GM-AEJM|1	8237.4
1886	13.12	26.985	1001.39	1001.42	GM-AEJM|1	4599.2
1681	12.394	42.672	1001.41	1001.42	GM-AEJM|1	13483
1888	13.197	35.092	1001.41	1001.42	GM-AEJM|1	6392.7
239	8.085	23.254	976.439	976.429	GM-AEJPA (Deacetyl-Anhydro) |1	7188.6
1018	8.11	48.222	976.425	976.4286,976.4039	GM-AEJPA (Deacetyl-Anhydro) |1,GM-GM|0	9298.6
238	8.075	64.354	976.424	976.4286,976.4039	GM-AEJPA (Deacetyl-Anhydro) |1,GM-GM|0	13332
1016	8.11	57.769	976.414	976.4286,976.4039	GM-AEJPA (Deacetyl-Anhydro) |1,GM-GM|0	19266
207	7.979	24.665	1038.48	1038.47	GM-AEJPA|1	6508.8
199	8.023	35.802	1038.49	1038.47	GM-AEJPA|1	55010
1114	9.248	23.714	1184.52	1184.51	GM-AEJQW|1	4202.6
371	9.184	31.526	1184.51	1184.51	GM-AEJQW|1	11158
162	6.556	89.066	1052.39	1052.41	GM-AEJSD (Anhydro) |1	7016.2
1840	13.537	32.314	1072.42	1072.43	GM-AEJSD|1	5853.4
798	13.578	33.8	1072.42	1072.43	GM-AEJSD|1	6881
2433	16.397	42.753	1054.46	1054.46	GM-AEJSP|1	6714.5
799	13.488	49.714	1072.48	1072.47	GM-AEJTT|1	6660.2
1079	8.427	44.524	949.414	949.417	GM-AEJV (Anhydro) |1	5074.7
1076	8.447	46.333	949.403	949.417	GM-AEJV (Anhydro) |1	8054
118	5.767	72.742	927.42	927.433	GM-AEJV (Deacetyl) |1	6521.4
1646	12.213	35.836	969.447	969.443	GM-AEJV|1	5216
1645	12.257	38.88	969.433	969.443	GM-AEJV|1	8984.2
1644	12.188	38.88	969.43	969.443	GM-AEJV|1	8656.5
507	10.59	35.927	1159.44	1159.46	GM-AEJWC|1	7750.4
494	10.591	31.27	1159.45	1159.46	GM-AEJWC|1	5485.6
1162	10.699	35.927	1159.46	1159.46	GM-AEJWC|1	9775.4
1172	10.682	29.449	1159.47	1159.46	GM-AEJWC|1	4503.6
1173	10.62	39.485	1159.44	1159.46	GM-AEJWC|1	15577
243	8	35.802	1241.57	1241.55	GM-AEJWW (Amidated) |1	42774
220	8.057	41.606	1241.58	1241.55	GM-AEJWW (Amidated) |1	160280
223	8.082	37.506	1241.56	1241.55	GM-AEJWW (Amidated) |1	55766
227	8.11	19.587	1241.55	1241.55	GM-AEJWW (Amidated) |1	5224.6
1006	8.11	31.978	1241.57	1241.55	GM-AEJWW (Amidated) |1	14241
421	9.702	18.667	1241.58	1241.55	GM-AEJWW (Amidated) |1	3436.7
298	8.68	29.122	1242.53	1242.5346,1242.535	GM-AEJWW|1,GM-AEJ-GM-AEJ (Amidase Product) |2	4837
1713	12.383	35.918	1013.43	1013.41	GM-AEJY (Anhydro) |1	4858.8
1712	12.384	52.666	1013.42	1013.41	GM-AEJY (Anhydro) |1	6052.2
803	13.731	56.747	1033.41	1033.44	GM-AEJY|1	20957.9
804	13.726	60.994	1033.43	1033.44	GM-AEJY|1	21431
805	13.712	58.877	1033.44	1033.44	GM-AEJY|1	15250
1984	13.659	56.747	1033.45	1033.44	GM-AEJY|1	7233.5
1981	13.674	60.493	1033.43	1033.44	GM-AEJY|1	18413
1982	13.685	50.691	1033.41	1033.44	GM-AEJY|1	4802.7
1980	13.671	58.363	1033.42	1033.44	GM-AEJY|1	15388
806	13.712	54.7	1033.46	1033.44	GM-AEJY|1	9406.6
1983	13.659	58.363	1033.44	1033.44	GM-AEJY|1	12538
78	4.376	147.831	870.391	870.371	GM-AEJ|1	126610
954	5.775	36.763	870.352	870.371	GM-AEJ|1	3379.2
893	4.384	152.034	870.391	870.371	GM-AEJ|1	543300
891	4.384	178.939	870.381	870.371	GM-AEJ|1	924110
76	4.317	157.617	870.363	870.371	GM-AEJ|1	427095
77	4.378	159.759	870.376	870.371	GM-AEJ|1	196850
1113	9.16	31.418	870.388	870.371	GM-AEJ|1	7853.1
889	4.341	155.642	870.361	870.371	GM-AEJ|1	1189200
1111	9.124	38.714	870.369	870.371	GM-AEJ|1	17129
1110	9.121	38.714	870.359	870.371	GM-AEJ|1	24273.1
1112	9.157	36.898	870.378	870.371	GM-AEJ|1	13293
890	4.382	184.354	870.371	870.371	GM-AEJ|1	1325100
322	8.822	71.446	698.28	698.286	GM-AE|1	171965
324	8.709	65.554	698.271	698.286	GM-AE|1	70292
325	8.781	71.446	698.288	698.286	GM-AE|1	122590
326	8.759	67.609	698.297	698.286	GM-AE|1	78189
512	10.608	41.189	1454.62	1454.58	GM-GM (x2)|0	20914
1944	13.433	18.945	3195.34	3195.3622,3195.3622,3195.3622	GM-GM-AEJ-GM-AEJ-GM-AEJAA|3,GM-GM-AEJ-GM-AEJA-GM-AEJA|3,GM-GM-AEJA-GM-AEJA-GM-AEJ|3	6929.6
1962	13.388	18.945	3195.37	3195.3622,3195.3622,3195.3622	GM-GM-AEJ-GM-AEJ-GM-AEJAA|3,GM-GM-AEJ-GM-AEJA-GM-AEJA|3,GM-GM-AEJA-GM-AEJA-GM-AEJ|3	4403.9
1021	8.215	17.416	3124.38	3124.3251,3124.3251	GM-GM-AEJ-GM-AEJ-GM-AEJA|3,GM-GM-AEJ-GM-AEJA-GM-AEJ|3	9226.6
735	12.796	42.062	3124.28	3124.3251,3124.3251	GM-GM-AEJ-GM-AEJ-GM-AEJA|3,GM-GM-AEJ-GM-AEJA-GM-AEJ|3	153420
1996	13.619	51.184	3266.45	3266.3993,3266.3993	GM-GM-AEJ-GM-AEJA-GM-AEJAA|3,GM-GM-AEJA-GM-AEJA-GM-AEJA|3	20211
1986	13.677	30.174	3266.37	3266.3993,3266.3993	GM-GM-AEJ-GM-AEJA-GM-AEJAA|3,GM-GM-AEJA-GM-AEJA-GM-AEJA|3	13548
1987	13.627	28.295	3266.4	3266.3993,3266.3993	GM-GM-AEJ-GM-AEJA-GM-AEJAA|3,GM-GM-AEJA-GM-AEJA-GM-AEJA|3	10636
1994	13.724	38.406	3266.38	3266.3993,3266.3993	GM-GM-AEJ-GM-AEJA-GM-AEJAA|3,GM-GM-AEJA-GM-AEJA-GM-AEJA|3	46933
1995	13.67	54.512	3266.41	3266.3993,3266.3993	GM-GM-AEJ-GM-AEJA-GM-AEJAA|3,GM-GM-AEJA-GM-AEJA-GM-AEJA|3	32627
1985	13.673	28.295	3266.34	3266.3993,3266.3993	GM-GM-AEJ-GM-AEJA-GM-AEJAA|3,GM-GM-AEJA-GM-AEJA-GM-AEJA|3	12609
1474	11.819	27.783	2200.89	2200.93	GM-GM-AEJ-GM-AEJ|2	14276
1475	11.819	25.794	2200.92	2200.93	GM-GM-AEJ-GM-AEJ|2	12360
1477	11.812	9.482	2200.96	2200.93	GM-GM-AEJ-GM-AEJ|2	4579.3
1476	11.808	17.889	2200.94	2200.93	GM-GM-AEJ-GM-AEJ|2	8144.6
1478	11.853	22.052	2200.87	2200.93	GM-GM-AEJ-GM-AEJ|2	11334
664	11.808	7.922	2200.94	2200.93	GM-GM-AEJ-GM-AEJ|2	6581.4
665	11.815	10.863	2200.91	2200.93	GM-GM-AEJ-GM-AEJ|2	9005.9
666	11.78	13.964	2200.89	2200.93	GM-GM-AEJ-GM-AEJ|2	8714
1725	12.737	44.492	2342.98	2343.0024,2343.0024	GM-GM-AEJA-GM-AEJA|2,GM-GM-AEJ-GM-AEJAA|2	271330
1724	12.774	44.492	2342.95	2343.0024,2343.0024	GM-GM-AEJA-GM-AEJA|2,GM-GM-AEJ-GM-AEJAA|2	250780
1727	12.756	40.976	2343.02	2343.0024,2343.0024	GM-GM-AEJA-GM-AEJA|2,GM-GM-AEJ-GM-AEJAA|2	133340
1726	12.761	44.492	2343	2343.0024,2343.0024	GM-GM-AEJA-GM-AEJA|2,GM-GM-AEJ-GM-AEJAA|2	208830
1728	12.765	36.296	2343.05	2343.0024,2343.0024	GM-GM-AEJA-GM-AEJA|2,GM-GM-AEJ-GM-AEJAA|2	79553
669	11.798	14.593	2400.07	2400.0239,2400.065	GM-GM-AEJA-GM-AEJGA|2,GM-GM-AEJA-GM-AEJK|2	5002.5
1495	11.787	21.988	2400.04	2400.0239,2400.065	GM-GM-AEJA-GM-AEJGA|2,GM-GM-AEJA-GM-AEJK|2	10818
670	11.79	18.064	2400.01	2400.0239,2400.065	GM-GM-AEJA-GM-AEJGA|2,GM-GM-AEJA-GM-AEJK|2	7124.8
1496	11.84	18.064	2400.06	2400.0239,2400.065	GM-GM-AEJA-GM-AEJGA|2,GM-GM-AEJA-GM-AEJK|2	8961.7
671	11.809	16.703	2400.04	2400.0239,2400.065	GM-GM-AEJA-GM-AEJGA|2,GM-GM-AEJA-GM-AEJK|2	6578.3
1503	11.818	24.081	2400.01	2400.0239,2400.065	GM-GM-AEJA-GM-AEJGA|2,GM-GM-AEJA-GM-AEJK|2	10523
1485	11.771	14.593	2400.08	2400.0239,2400.065	GM-GM-AEJA-GM-AEJGA|2,GM-GM-AEJA-GM-AEJK|2	5037
1661	12.388	41.54	2272	2271.9653,2271.9653	GM-GM-AEJA-GM-AEJ|2,GM-GM-AEJ-GM-AEJA|2	22272
710	12.463	43.368	2271.92	2271.9653,2271.9653	GM-GM-AEJA-GM-AEJ|2,GM-GM-AEJ-GM-AEJA|2	41908
1662	12.39	32.629	2272.02	2271.9653,2271.9653	GM-GM-AEJA-GM-AEJ|2,GM-GM-AEJ-GM-AEJA|2	12070
711	12.464	43.368	2271.95	2271.9653,2271.9653	GM-GM-AEJA-GM-AEJ|2,GM-GM-AEJ-GM-AEJA|2	37541
712	12.465	43.368	2271.98	2271.9653,2271.9653	GM-GM-AEJA-GM-AEJ|2,GM-GM-AEJ-GM-AEJA|2	23399
714	12.473	35.918	2272.01	2271.9653,2271.9653	GM-GM-AEJA-GM-AEJ|2,GM-GM-AEJ-GM-AEJA|2	13868
1657	12.383	47.266	2271.93	2271.9653,2271.9653	GM-GM-AEJA-GM-AEJ|2,GM-GM-AEJ-GM-AEJA|2	70399
1659	12.388	45.461	2271.98	2271.9653,2271.9653	GM-GM-AEJA-GM-AEJ|2,GM-GM-AEJ-GM-AEJA|2	37873
1658	12.388	47.266	2271.95	2271.9653,2271.9653	GM-GM-AEJA-GM-AEJ|2,GM-GM-AEJ-GM-AEJA|2	58588
1149	10.556	32.108	1419.62	1419.61	GM-GM-AEJA|1	9262.4
1148	10.571	33.694	1419.61	1419.61	GM-GM-AEJA|1	16370
1147	10.552	37.559	1419.6	1419.61	GM-GM-AEJA|1	27489
1145	10.545	41.101	1419.58	1419.61	GM-GM-AEJA|1	36801
471	10.413	44.921	1419.6	1419.61	GM-GM-AEJA|1	107870
472	10.413	43.242	1419.62	1419.61	GM-GM-AEJA|1	66304
467	10.427	30.579	1419.6	1419.61	GM-GM-AEJA|1	9150
1144	10.545	39.327	1419.57	1419.61	GM-GM-AEJA|1	32977
463	10.428	22.682	1419.62	1419.61	GM-GM-AEJA|1	5733.3
466	10.434	30.579	1419.58	1419.61	GM-GM-AEJA|1	11792
470	10.412	44.921	1419.58	1419.61	GM-GM-AEJA|1	144780
1143	10.556	24.704	1419.64	1419.61	GM-GM-AEJA|1	4309.6
473	10.413	39.327	1419.64	1419.61	GM-GM-AEJA|1	40266
2376	15.42	33.349	1623.66	1623.7	GM-GM-AEJFQ|1	9229.9
2377	15.43	27.322	1623.68	1623.7	GM-GM-AEJFQ|1	8184.2
1116	9.429	15.524	1476.63	1476.627,1476.6368	GM-GM-AEJGA|1,GM-AEJA-GM-AEJY (Amidase Product) |2	4332.3
398	9.337	41.615	1476.63	1476.627,1476.6368	GM-GM-AEJGA|1,GM-AEJA-GM-AEJY (Amidase Product) |2	64376
1117	9.314	21.144	1476.64	1476.627,1476.6681,1476.6368	GM-GM-AEJGA|1,GM-GM-AEJK|1,GM-AEJA-GM-AEJY (Amidase Product) |2	4869.1
413	9.413	27.238	1476.66	1476.627,1476.6681,1476.6368	GM-GM-AEJGA|1,GM-GM-AEJK|1,GM-AEJA-GM-AEJY (Amidase Product) |2	8392.7
412	9.411	29.13	1476.64	1476.627,1476.6681,1476.6368	GM-GM-AEJGA|1,GM-GM-AEJK|1,GM-AEJA-GM-AEJY (Amidase Product) |2	9542
399	9.334	43.78	1476.64	1476.627,1476.6681,1476.6368	GM-GM-AEJGA|1,GM-GM-AEJK|1,GM-AEJA-GM-AEJY (Amidase Product) |2	74717
400	9.331	39.497	1476.66	1476.627,1476.6681,1476.6368	GM-GM-AEJGA|1,GM-GM-AEJK|1,GM-AEJA-GM-AEJY (Amidase Product) |2	51295
405	9.413	23.233	1476.68	1476.67	GM-GM-AEJK|1	4786.6
402	9.327	33.198	1476.7	1476.67	GM-GM-AEJK|1	18330
401	9.331	39.497	1476.68	1476.67	GM-GM-AEJK|1	30473
349	9.176	44.349	1348.59	1348.57	GM-GM-AEJ|1	63277
1107	9.162	25.792	1348.6	1348.57	GM-GM-AEJ|1	6598
1109	9.191	31.418	1348.59	1348.57	GM-GM-AEJ|1	13186
347	9.175	48.267	1348.55	1348.5684,1348.5504	GM-GM-AEJ|1,GM-AEJ-GM (x2) (Amidase Product) |2	146270
348	9.178	46.158	1348.57	1348.5684,1348.5504	GM-GM-AEJ|1,GM-AEJ-GM (x2) (Amidase Product) |2	102950
2227	14.834	44.31	1348.54	1348.5684,1348.5504	GM-GM-AEJ|1,GM-AEJ-GM (x2) (Amidase Product) |2	7436
384	9.201	35.217	1348.54	1348.5684,1348.5504	GM-GM-AEJ|1,GM-AEJ-GM (x2) (Amidase Product) |2	8630.8
385	9.201	31.418	1348.56	1348.5684,1348.5504	GM-GM-AEJ|1,GM-AEJ-GM (x2) (Amidase Product) |2	6984.9
1104	9.171	42.264	1348.55	1348.5684,1348.5504	GM-GM-AEJ|1,GM-AEJ-GM (x2) (Amidase Product) |2	52166
1103	9.161	38.714	1348.54	1348.5684,1348.5504	GM-GM-AEJ|1,GM-AEJ-GM (x2) (Amidase Product) |2	51005
1106	9.179	36.898	1348.57	1348.5684,1348.5504	GM-GM-AEJ|1,GM-AEJ-GM (x2) (Amidase Product) |2	22734
1105	9.189	38.714	1348.56	1348.5684,1348.5504	GM-GM-AEJ|1,GM-AEJ-GM (x2) (Amidase Product) |2	37548
570	10.967	27.59	1176.46	1176.48	GM-GM-AE|1	5887.4
1294	11.031	36.987	1176.46	1176.48	GM-GM-AE|1	7481.6
1295	10.994	35.311	1176.47	1176.48	GM-GM-AE|1	5393.4
195	8.075	66.256	498.199	498.206	GM|0	14803
197	8.075	66.256	498.212	498.206	GM|0	12643
196	8.075	70.268	498.203	498.206	GM|0	18992
1572	12.007	40.281	1866.74	1866.7017,1866.7887,1866.7891,1866.7675	K+ GM-AEJ-GM (x2)|2,GM-AEJ-GM-AEJDA (Deacetyl) |2,GM-AEJ-GM-AEJEG (Deacetyl) |2,GM-AEJ-GM-AEJSP (Double Anhydro) |2	39001
2169	14.616	48.712	1866.74	1866.7017,1866.7887,1866.7891,1866.7675	K+ GM-AEJ-GM (x2)|2,GM-AEJ-GM-AEJDA (Deacetyl) |2,GM-AEJ-GM-AEJEG (Deacetyl) |2,GM-AEJ-GM-AEJSP (Double Anhydro) |2	47116
854	14.598	20.188	1866.73	1866.7017,1866.7675	K+ GM-AEJ-GM (x2)|2,GM-AEJ-GM-AEJSP (Double Anhydro) |2	6471.7
2168	14.64	45.324	1866.72	1866.7017,1866.7675	K+ GM-AEJ-GM (x2)|2,GM-AEJ-GM-AEJSP (Double Anhydro) |2	28400
2518	17.398	10.456	1962.83	1962.7867,1962.8221	K+ GM-AEJ-GM-AEJTT|2,Na+ GM-AEJA-GM-AEJF|2	4621.4
539	11.048	9.999	1944.81	1944.8121,1944.8121,1944.8121,1944.7758,1944.8569	K+ GM-AEJA-GM-AEJI|2,K+ GM-AEJA-GM-AEJL|2,K+ GM-AEJ-GM-AEJIA|2,K+ GM-AEJ-GM-AEJSP|2,GM-AEJ-GM-AEJRQ (Deacetyl-Anhydro) |2	4370.5
2519	17.398	24.722	1962.81	1962.7681,1962.7681,1962.7682,1962.7867,1962.8221	K+ GM-AEJA-GM-AEJM|2,K+ GM-AEJ-GM-AEJMA|2,K+ GM-AEJ-GM-AEJVC|2,K+ GM-AEJ-GM-AEJTT|2,Na+ GM-AEJA-GM-AEJF|2	6114.1
1137	10.345	26.179	1930.82	1930.7961,1930.7965,1930.7961,1930.7811,1930.7815,1930.797,1930.817	K+ GM-AEJA-GM-AEJV|2,K+ GM-AEJ-GM-AEJLG|2,K+ GM-AEJ-GM-AEJVA|2,Na+ GM-AEJ-GM-AEJDA|2,Na+ GM-AEJ-GM-AEJEG|2,Na+ GM-AEJ-GM-AEJW|2,Na+ GM-AEJ-GM-AEJVS|2	7529.9
452	10.263	24.17	1930.81	1930.7961,1930.7965,1930.7961,1930.7811,1930.7815,1930.797,1930.817	K+ GM-AEJA-GM-AEJV|2,K+ GM-AEJ-GM-AEJLG|2,K+ GM-AEJ-GM-AEJVA|2,Na+ GM-AEJ-GM-AEJDA|2,Na+ GM-AEJ-GM-AEJEG|2,Na+ GM-AEJ-GM-AEJW|2,Na+ GM-AEJ-GM-AEJVS|2	8516.1
1136	10.367	24.038	1930.8	1930.7961,1930.7965,1930.7961,1930.7811,1930.7815,1930.797,1930.817	K+ GM-AEJA-GM-AEJV|2,K+ GM-AEJ-GM-AEJLG|2,K+ GM-AEJ-GM-AEJVA|2,Na+ GM-AEJ-GM-AEJDA|2,Na+ GM-AEJ-GM-AEJEG|2,Na+ GM-AEJ-GM-AEJW|2,Na+ GM-AEJ-GM-AEJVS|2	6906.7
453	10.263	22.028	1930.84	1930.7961,1930.7965,1930.7961,1930.797,1930.817	K+ GM-AEJA-GM-AEJV|2,K+ GM-AEJ-GM-AEJLG|2,K+ GM-AEJ-GM-AEJVA|2,Na+ GM-AEJ-GM-AEJW|2,Na+ GM-AEJ-GM-AEJVS|2	6418.6
1135	10.345	22.028	1930.84	1930.7961,1930.7965,1930.7961,1930.797,1930.817	K+ GM-AEJA-GM-AEJV|2,K+ GM-AEJ-GM-AEJLG|2,K+ GM-AEJ-GM-AEJVA|2,Na+ GM-AEJ-GM-AEJW|2,Na+ GM-AEJ-GM-AEJVS|2	5583.2
1779	12.663	29.106	1661.72	1661.7253,1661.7253	M-AEJA-GM-AEJA|2,M-AEJ-GM-AEJAA|2	11171
1780	12.664	31.088	1661.73	1661.7253,1661.7253	M-AEJA-GM-AEJA|2,M-AEJ-GM-AEJAA|2	7475.9
1778	12.691	29.106	1661.7	1661.7253,1661.7253	M-AEJA-GM-AEJA|2,M-AEJ-GM-AEJAA|2	9091.6
1769	12.727	23.321	1661.75	1661.7253,1661.7253	M-AEJA-GM-AEJA|2,M-AEJ-GM-AEJAA|2	5024.9
2007	13.792	23.162	1865.79	1865.82	M-AEJA-GM-AEJFQ|2	4587.4
1203	10.73	33.712	1792.79	1792.77,1792.7518,1792.7701,1792.7886,1792.7835,1792.7835	M-AEJA-GM-AEJMA|2,M-AEJA-GM-AEJSD|2,M-AEJA-GM-AEJVC|2,M-AEJA-GM-AEJTT|2,GM-AEJA-GM-AEJ (Amidated) |2,GM-AEJ-GM-AEJA (Amidated) |2	15793
1201	10.68	33.712	1792.75	1792.77,1792.7518,1792.7701,1792.7886,1792.7835,1792.7835	M-AEJA-GM-AEJMA|2,M-AEJA-GM-AEJSD|2,M-AEJA-GM-AEJVC|2,M-AEJA-GM-AEJTT|2,GM-AEJA-GM-AEJ (Amidated) |2,GM-AEJ-GM-AEJA (Amidated) |2	10499
1202	10.739	33.712	1792.77	1792.77,1792.7518,1792.7701,1792.7886,1792.7835,1792.7835	M-AEJA-GM-AEJMA|2,M-AEJA-GM-AEJSD|2,M-AEJA-GM-AEJVC|2,M-AEJA-GM-AEJTT|2,GM-AEJA-GM-AEJ (Amidated) |2,GM-AEJ-GM-AEJA (Amidated) |2	17344
1204	10.704	29.819	1792.81	1792.77,1792.7701,1792.7886,1792.7835,1792.7835	M-AEJA-GM-AEJMA|2,M-AEJA-GM-AEJVC|2,M-AEJA-GM-AEJTT|2,GM-AEJA-GM-AEJ (Amidated) |2,GM-AEJ-GM-AEJA (Amidated) |2	11977
1197	10.701	23.161	1792.83	1792.7886,1792.7835,1792.7835	M-AEJA-GM-AEJTT|2,GM-AEJA-GM-AEJ (Amidated) |2,GM-AEJ-GM-AEJA (Amidated) |2	7244.3
2420	16.11	32.841	1753.72	1753.7529,1753.7151,1753.7151	M-AEJA-GM-AEJY|2,GM-AEJA-GM-AEJ (Double Anhydro) |2,GM-AEJ-GM-AEJA (Double Anhydro) |2	13710
2412	16.11	30.998	1753.74	1753.7529,1753.7151,1753.7151	M-AEJA-GM-AEJY|2,GM-AEJA-GM-AEJ (Double Anhydro) |2,GM-AEJ-GM-AEJA (Double Anhydro) |2	10276
2406	16.103	22.97	1753.76	1753.7529,1753.7151,1753.7151	M-AEJA-GM-AEJY|2,GM-AEJA-GM-AEJ (Double Anhydro) |2,GM-AEJ-GM-AEJA (Double Anhydro) |2	6307.3
737	12.69	42.062	781.33	781.334	M-AEJGG|1	79862
738	12.69	40.976	781.34	781.334	M-AEJGG|1	55930
739	12.689	39.765	781.35	781.334	M-AEJGG|1	34630
1595	12.07	36.743	1872.75	1872.7708,1872.7709	Na+ GM-AEJA-GM-AEJG|2,Na+ GM-AEJ-GM-AEJGA|2	9804.1
1586	12.112	40.281	1872.77	1872.7708,1872.7709,1872.812	Na+ GM-AEJA-GM-AEJG|2,Na+ GM-AEJ-GM-AEJGA|2,Na+ GM-AEJ-GM-AEJK|2	22947
1638	12.202	33.176	1872.77	1872.7708,1872.7709,1872.812,1872.814,1872.8144,1872.814	Na+ GM-AEJA-GM-AEJG|2,Na+ GM-AEJ-GM-AEJGA|2,Na+ GM-AEJ-GM-AEJK|2,GM-AEJA-GM-AEJV (Anhydro) |2,GM-AEJ-GM-AEJLG (Anhydro) |2,GM-AEJ-GM-AEJVA (Anhydro) |2	6409.3
1639	12.104	33.452	1872.79	1872.7708,1872.7709,1872.812,1872.814,1872.8144,1872.814	Na+ GM-AEJA-GM-AEJG|2,Na+ GM-AEJ-GM-AEJGA|2,Na+ GM-AEJ-GM-AEJK|2,GM-AEJA-GM-AEJV (Anhydro) |2,GM-AEJ-GM-AEJLG (Anhydro) |2,GM-AEJ-GM-AEJVA (Anhydro) |2	5835.3
1588	12.02	38.436	1872.81	1872.7708,1872.7709,1872.812,1872.814,1872.8144,1872.814	Na+ GM-AEJA-GM-AEJG|2,Na+ GM-AEJ-GM-AEJGA|2,Na+ GM-AEJ-GM-AEJK|2,GM-AEJA-GM-AEJV (Anhydro) |2,GM-AEJ-GM-AEJLG (Anhydro) |2,GM-AEJ-GM-AEJVA (Anhydro) |2	16899
1587	12.028	40.281	1872.79	1872.7708,1872.7709,1872.812,1872.814,1872.8144,1872.814	Na+ GM-AEJA-GM-AEJG|2,Na+ GM-AEJ-GM-AEJGA|2,Na+ GM-AEJ-GM-AEJK|2,GM-AEJA-GM-AEJV (Anhydro) |2,GM-AEJ-GM-AEJLG (Anhydro) |2,GM-AEJ-GM-AEJVA (Anhydro) |2	23192
1077	8.427	53.509	949.393	949.374	Na+ GM-AEJG|1	12339
1078	8.626	50.039	949.382	949.374	Na+ GM-AEJG|1	10572
73	2.971	86.621	520.192	520.188	Na+ GM|0	14648
72	2.967	94.836	520.185	520.188	Na+ GM|0	19121
71	2.967	68.523	520.178	520.188	Na+ GM|0	11423
Unidentified
0	1.509	6.048	222.976			18086
1	1.509	6.048	222.985			13738
2	1.509	9.927	222.99			7772
3	1.514	6.249	222.98			15610
4	1.517	6.048	239.991			13067
5	1.534	6.451	239.996			16036
6	1.514	6.048	240.001			9674.1
7	1.522	5.242	240.988			3489.3
8	1.516	5.242	267.935			6127.4
9	4.506	113.895	203.075			44259
10	4.529	119.478	203.08			49709
11	4.529	112.089	203.085			29488
12	6.496	127.564	203.075			21571
13	6.421	119.504	203.08			23401
14	7.963	7.408	204.089			2319.4
15	8.502	64.354	203.097			4228.2
16	8.335	136.169	203.076			42991
17	8.546	161.096	203.079			48393
18	8.286	129.745	203.085			28716
19	12.004	87.423	203.073			4860.2
20	12.094	258.109	203.076			18640
21	17.959	84.147	222.14			33253
22	17.822	91.493	222.144			87467
23	17.664	91.493	222.149			74884
24	17.663	86.291	222.154			44272
25	17.663	84.147	222.159			26333
26	17.942	65.733	244.121			4300.3
27	18.061	86.291	244.124			20614
28	18.027	89.228	244.129			22242
29	17.965	79.406	239.166			29551
30	18.032	95.227	239.17			80817
31	17.853	95.227	239.175			71196
32	17.873	88.096	239.181			42881
33	17.849	84.147	239.186			25444
34	19.833	68.124	266.168			47761
35	19.907	57.345	266.164			10677
36	19.825	71.353	266.174			48636
37	19.823	68.124	266.179			29298
38	19.784	65.692	266.185			17169
39	20.001	64.223	288.148			16908
40	19.955	65.186	288.154			24512
41	19.976	61.622	288.16			15928
42	19.901	71.353	283.193			63252
43	19.986	99.368	283.196			112390
44	19.876	78.19	283.202			100460
45	19.993	75.422	283.208			64587
46	19.992	69.424	283.214			38727
47	19.986	64.223	283.22			22309
48	22.251	19.271	239.135			2820.2
49	22.864	29.756	678.49			6422.2
50	22.92	34.039	678.502			10574
51	22.866	34.039	678.514			7556
52	24.535	19.272	213.125			2012.2
53	26.003	25.697	353.237			3091.6
54	26.299	8.566	244.142			2968.2
55	26.418	17.13	353.237			3314.2
56	26.513	12.847	341.274			2883.3
57	25.856	152.04	226.133			5308.2
58	26.708	149.904	212.117			7689.2
59	26.842	177.741	212.122			16919
60	26.877	96.361	241.272			139540
61	26.872	107.068	241.276			203190
62	26.875	96.361	241.282			126410
63	27.079	62.098	1446.91			7178
64	27.156	68.525	1446.95			6491.9
65	26.884	47.109	241.266			13681
66	26.875	85.654	241.287			86587
67	26.875	66.382	241.292			55121
68	26.874	51.392	241.298			27663
69	26.878	44.968	241.303			15869
70	26.873	40.685	241.309			10893
75	4.075	29.35	914.324			7329.5
79	4.374	131.948	870.405			79910
80	4.27	124.07	871.356			60636
81	4.374	123.96	870.419			46330
82	4.393	89.342	870.434			23859
83	4.306	45.113	435.169			4784
84	4.435	116.304	870.344			64271
85	4.366	63.219	870.448			16750
86	4.397	59.51	870.462			8726.4
89	4.245	92.111	668.28			28996
92	4.453	123.96	667.315			58509
93	4.357	65.025	667.268			19428
94	4.45	91.672	667.323			34023
95	4.454	63.219	667.332			18483
99	4.366	130.766	892.383			36291
100	4.365	115.363	892.398			21935
101	4.221	109.625	893.332			19195
102	4.248	99.134	892.322			17402
103	4.341	89.005	892.412			10823
104	4.312	73.172	892.427			6422.6
105	4.588	17.828	872.346			2625.6
108	4.276	69.402	689.259			9068.7
109	4.292	89.24	689.267			15259
110	4.366	85.609	689.276			12218
111	4.453	89.801	924.279			6987.3
112	4.348	89.801	924.293			7592.3
114	4.871	50.958	719.274			6877.7
115	4.869	54.232	719.282			9000.8
116	5.101	51.968	914.324			12296
125	6.574	118.035	998.499			143990
126	6.451	110.862	998.514			107130
127	6.45	101.829	998.529			57401
129	6.442	96.793	998.545			38869
130	6.446	89.066	998.56			23174
131	6.457	78.994	998.575			13899
132	6.616	6.734	848.303			3124.6
133	6.351	66.763	998.622			5824.4
134	6.456	68.904	998.668			6136.5
135	6.459	62.671	998.715			4936.3
138	6.421	100.165	795.371			47777
143	6.443	87.197	795.419			13619
144	6.442	74.81	795.429			6522.1
145	6.459	66.763	998.637			5880.2
146	6.404	74.81	998.606			8498.1
147	6.483	74.81	998.653			9291.8
148	6.201	85.224	1051.36			6257.9
149	6.337	91.074	1052.38			9107.2
150	6.447	76.951	998.591			12316
154	6.472	93.047	795.418			15251
155	6.575	89.066	795.432			8737.5
156	6.173	85.222	1020.51			6348.3
161	6.171	95.006	1020.49			12669
163	7.318	64.891	1306.54			14000
164	7.267	60.609	1306.56			8657.6
165	7.337	64.891	1306.53			15435
166	7.226	48.859	1306.58			5263.4
167	7.32	51	1306.54			5890.1
168	7.153	46.549	1306.51			6322.2
169	7.33	61.762	966.421			6830
170	7.69	21.808	1742.71			5255.1
176	7.915	26.911	951.525			10857
177	7.915	22.906	951.539			5705.4
178	7.422	65.984	966.391			7346.5
179	7.349	67.969	966.406			8538.9
182	7.953	20.765	1263.56			10822
183	7.963	20.765	1263.58			11528
184	7.954	16.66	1263.6			7639.4
185	7.96	12.899	1263.55			4075
186	7.948	10.844	1263.62			4196.2
187	7.979	18.718	1294.5			7768.2
188	7.979	17.046	1294.51			7189.6
189	7.915	14.564	1154.61			4376.2
190	7.966	13.535	1263.58			4621.4
194	7.995	13.535	1241.72			3986.6
198	8.068	36.249	498.222			6962.4
200	8.058	41.606	1038.51			151450
201	8.027	41.606	1038.52			151350
202	8.019	41.606	1038.54			104450
203	8.014	35.802	1038.55			63831
204	8.006	35.802	1038.57			37961
205	8.006	29.964	1038.58			19030
206	8.014	26.379	1038.6			12045
208	8.017	21.051	1038.62			6655.6
209	8.009	13.802	1249.59			3664.4
210	7.999	35.802	1241.59			73133
211	7.999	34.035	1241.63			36320
212	8.023	14.999	1020.54			3921.7
217	7.915	30.577	1154.6			11647
218	8.11	19.587	1241.72			5072
219	8.11	17.552	1241.74			3901.8
221	8.109	41.606	1241.6			196290
222	8.108	41.606	1241.62			140100
224	8.11	37.506	1241.63			86229
225	8.109	35.802	1241.65			51443
226	8.099	31.978	1241.67			25155
231	8.032	17.046	1241.7			6112.6
232	7.998	26.379	1241.67			12350
233	7.999	35.802	1241.61			59759
240	8.061	23.003	1020.49			6706.9
241	8.023	21.051	1020.52			6868.6
242	8.099	29.964	1241.68			15726
244	7.991	26.911	1154.62			6366.3
245	7.999	32.021	1241.65			22697
246	8.024	29.964	1020.51			9667.6
247	8.098	24.718	1241.7			8817.5
251	8.121	91.723	681.247			39195
252	8.136	99.592	681.254			67651
253	8.138	99.592	681.263			56147
254	8.138	91.723	681.272			34009
255	8.11	82.291	681.28			20032
256	8.389	36.468	1109.55			19319
257	8.391	34.42	1109.56			18540
258	8.404	32.45	1109.53			8031.6
259	8.399	28.78	1109.58			11590
260	8.399	24.776	1109.59			6609.3
261	8.398	38.567	1312.62			32589
262	8.413	38.567	1312.64			27636
263	8.416	36.468	1312.66			17321
264	8.399	30.582	1312.68			10274
265	8.455	36.468	1312.61			14543
266	8.399	24.776	1312.69			5680.8
267	8.35	18.541	1312.68			3659.1
268	8.436	26.811	1569.74			7232.3
269	8.461	30.582	1569.76			14271
270	8.436	30.582	1569.78			13004
271	8.315	34.6	1312.62			7445.8
272	8.383	28.547	1312.66			6732.2
273	8.487	26.811	1366.71			6375.2
274	8.384	28.78	1569.8			6120.9
275	8.38	32.552	1569.78			9405.2
276	8.347	34.6	1312.64			8602.6
279	8.4	65.645	941.38			142630
284	8.4	55.411	941.485			45155
285	8.41	53.509	941.5			26767
286	8.557	51.72	3293.77			17000
287	8.514	51.72	941.515			16622
288	8.426	49.665	941.53			15479
289	8.449	47.984	941.545			10892
290	8.452	46.333	941.56			7499.1
291	8.398	46.333	941.575			7420
292	8.402	47.984	941.59			12057
293	8.426	46.333	941.605			8175
294	8.39	40.469	941.66			5150.5
295	8.381	32.45	1569.76			10615
296	8.438	30.582	1569.79			8365.1
297	8.472	34.42	1366.69			8424.1
302	8.463	40.469	738.299			5626.4
303	8.455	57.421	738.308			38406
305	8.418	61.396	738.352			68314
306	8.491	55.411	738.361			39840
307	8.516	53.509	738.37			21392
308	8.516	49.665	738.38			13368
312	8.846	59.518	720.246			9649
314	8.905	57.545	720.293			15388
315	8.899	59.518	720.302			8013.5
316	8.63	57.368	720.311			6302.7
317	8.676	55.366	720.321			5173.3
318	8.792	9.628	791.24			2600.5
323	8.614	53.221	698.264			13229
327	8.71	65.554	698.306			45847
328	8.784	61.618	698.315			27569
329	8.795	57.388	698.324			14070
330	8.79	51.219	698.334			8727.4
334	8.327	53.509	963.362			6809.5
340	8.763	37.954	995.311			6331.2
341	8.72	55.411	995.327			7523.4
343	9.106	28.765	1377.6			10032
344	8.977	26.76	1377.56			6570.3
345	9.016	26.76	1377.58			7523.8
350	9.176	42.264	1348.6			37086
351	9.15	40.364	1348.52			41416
352	9.176	38.714	1348.62			19903
353	9.18	33.309	1348.64			11243
354	9.18	27.497	1348.66			7047.3
355	9.233	17.937	1349.5			4897.1
357	9.091	31.418	1370.51			7276.3
358	9.138	34.99	1370.52			10561
359	9.129	31.418	1370.54			10009
360	9.172	23.429	1402.44			4284.7
361	9.146	72.334	958.349			13790
362	9.158	68.689	958.364			16217
364	9.295	80.199	478.167			15356
366	9.187	80.623	478.198			12422
367	9.196	25.708	1145.46			5315.9
368	9.19	31.164	1145.47			5951.3
373	9.093	25.11	1377.62			6513.8
377	9.083	32.815	1377.57			20459
378	9.105	32.815	1377.58			16832
383	9.182	23.714	1412.6			5073.3
386	9.129	27.497	1370.56			6240
387	9.08	28.765	1377.55			11603
388	9.1	29.483	1402.48			5424.9
393	9.17	63.685	1313.62			7467.9
394	9.327	19.328	1273.55			4176.8
395	9.327	27.021	1273.56			5229.5
396	9.108	31.418	1402.46			6896.5
397	9.327	23.044	1476.74			5258.5
403	9.349	29.13	1477.61			13135
404	9.327	27.021	1476.72			9750.3
406	9.511	11.534	657.273			3086.4
409	9.305	43.361	500.148			6208.4
410	9.212	57.403	500.156			18094
411	9.233	57.403	500.163			16753
418	9.449	43.361	1110.48			7916
419	9.429	61.613	1110.5			8087.7
424	9.778	16.79	1719.84			4402.3
425	9.686	26.37	1719.76			15225
426	9.711	24.288	1719.79			12854
427	9.766	22.336	1719.81			7448.3
428	9.704	24.288	1719.74			7767.8
429	10.032	34.866	1181.51			22916
430	10.013	38.379	1181.53			31178
431	10.075	34.866	1181.54			22638
432	10.075	34.866	1181.56			14089
433	10.044	24.605	1181.58			6135.6
434	10.018	26.725	1181.49			5938.8
435	10.023	30.786	1406.59			10687
436	10.011	30.786	1406.57			9420.2
437	9.995	28.759	1406.61			8499.6
438	10.034	26.639	1406.62			4689.7
439	9.988	28.759	1384.65			8564
444	10.06	36.558	1384.65			35561
445	10.068	32.724	1384.67			20636
446	10.067	28.759	1384.68			10364
447	10.069	24.605	1384.7			6955.7
448	10	28.759	1384.67			6014
454	10.224	28.316	1226.58			6092
455	10.301	14.113	1930.87			4734
456	10.325	17.746	1479.78			4679.8
457	10.361	19.387	1441.53			5139.5
459	10.385	30.579	1441.55			13002
460	10.385	30.579	1441.57			11899
461	10.374	18.738	1473.52			6013.1
462	10.374	18.738	1419.71			3836.2
464	10.374	24.716	1473.48			7240.5
465	10.405	24.716	1473.5			8443.9
468	10.435	26.755	1419.69			7534.6
469	10.409	44.921	1419.56			107780
474	10.434	33.694	1420.55			13097
475	10.474	35.419	1419.65			22364
476	10.385	24.716	1216.5			6883.8
477	10.383	24.716	1216.51			5938.8
478	10.586	62.786	681.252			24060
479	10.555	69.006	681.261			21135
480	10.58	56.112	681.243			12149
481	10.59	59.787	681.27			12416
482	10.58	42.881	681.279			7112.4
483	10.374	26.738	1441.59			8009.1
484	10.517	19.047	2422.13			7787.9
487	10.465	30.579	1419.56			8942.8
492	10.556	52.524	478.194			12692
493	10.557	43.258	478.202			7218.2
496	10.457	33.694	1419.67			12263
502	10.522	19.047	2422.1			8550.4
506	10.523	34.532	1159.42			5569.3
513	10.584	35.927	1454.63			11136
514	10.687	37.619	1454.53			23132
515	10.59	29.449	1454.66			5300.4
516	10.612	27.675	1508.49			5313.9
517	10.756	17.94	1589.72			3957.5
519	10.77	18.555	2093.94			6644
520	10.807	19.708	1850.92			4582.9
521	10.792	24.744	1850.9			8908.9
522	10.795	8.398	1890.93			3305.7
523	10.803	10.449	2290.06			5806.1
524	10.756	26.749	1589.7			5491.6
528	10.807	13.902	1890.89			5946.6
533	10.78	18.903	2493.15			9487
534	10.849	18.903	2493.18			7799.4
536	10.852	33.617	698.306			13367
537	10.859	29.725	698.315			26201
538	10.864	29.725	698.324			22331
540	11.014	20.959	2007.95			4910.7
541	11.125	19.168	2165.06			5557.3
544	11.146	30.541	2164.96			10407
548	11.012	33.481	1722.78			20299
549	11.014	27.368	1722.8			12479
550	11.028	25.866	1722.83			6709.4
553	11.034	27.368	1722.68			9696.8
554	10.976	19.185	1722.85			4144.5
555	11.056	22.601	1316.55			4002.6
556	10.995	24.368	1316.57			5621.1
557	11.091	34.955	2165.12			14059
558	11.151	16.169	1922.02			4749.8
560	11.151	24.894	1921.97			13493
567	11.041	28.817	1519.71			9738.1
568	11.03	19.229	1519.73			4693.3
569	11.043	24.368	1176.45			4666.8
571	11.151	20.564	1921.99			7951.3
573	11.135	26.093	1961.97			5432.4
574	11.105	31.839	2164.92			13786
575	11.088	14.527	2165.17			5028.3
576	11.093	57.009	2164.98			144590
577	11.097	57.009	2165.01			120280
578	11.165	12.405	2236.18			4621.6
579	11.227	5.274	1719.79			3590.3
580	11.151	28.215	1921.94			26005
583	11.109	36.597	1961.92			14174
584	11.172	19.999	2032.92			8200.1
585	11.099	20.564	2165.15			9253.8
586	11.097	38.387	2165.09			26341
589	11.069	35.446	2164.99			12939
590	11.069	30.679	2165.02			9561.9
591	11.133	30.679	1961.94			9702.9
593	11.166	17.059	2032.95			10527
595	11.167	17.059	2032.98			7586.7
597	11.091	43.944	2165.04			76462
598	11.269	7.82	2230.01			4325.9
599	11.206	30.866	2236.02			75721
600	11.203	30.866	2236.04			62583
601	11.208	29.192	2236.07			38026
602	11.219	27.19	2235.99			46489
603	11.206	27.19	2236.1			23265
604	11.197	23.506	2236.13			12671
605	11.198	21.829	2234.96			10171
606	11.203	18.358	2236.16			7401.1
610	11.092	53.095	2164.95			81488
612	11.097	40.217	2165.06			47243
613	11.623	39.421	1847.7			9484.9
616	10.605	9.242	2164.98			5041.4
617	11.409	9.696	2231			4079.5
618	11.635	39.421	1847.67			10865
619	11.569	39.421	1847.65			7792.8
620	11.311	19.971	2229.97			5888.5
621	11.312	24.039	2229.89			13467
625	11.377	28.291	2229.94			8884.1
626	11.282	30.28	2229.92			10543
627	11.551	14.111	1590.83			3257
628	11.529	36.049	1795.9			6057.5
634	11.594	46.08	1590.74			46128
635	11.595	42.342	1590.76			26241
636	11.592	37.691	1590.78			13606
637	11.619	42.342	1590.64			21394
638	11.603	36.049	1590.79			9579.4
642	11.518	34.106	1794.93			5599.2
643	11.725	4.497	615.565			2859.7
645	11.584	29.494	1590.81			4293.1
647	11.689	44.536	1386.58			15301
648	11.624	48.168	1387.6			17721
649	11.592	40.981	1387.62			13874
650	11.775	26.109	1385.56			7013.5
651	11.518	37.691	1387.64			8958.6
652	11.491	48.168	1794.74			76628
653	11.485	48.168	1794.76			114500
654	11.483	48.168	1794.79			90812
655	11.481	48.168	1794.81			57775
656	11.5	44.178	1794.84			35695
658	11.529	37.691	1795.87			9933.7
659	11.623	37.691	1847.72			5933.7
663	11.784	16.703	1385.63			5735.2
667	11.796	7.922	2301.07			5124.7
668	11.793	13.964	2301.04			8353.4
672	11.793	21.971	2301.01			15546
673	11.792	21.971	2300.98			22460
674	11.811	19.982	2300.93			13306
675	11.776	24.041	2300.96			23462
676	12.194	42.247	1864.74			20992
677	12.03	35.12	1864.99			7467.7
678	12.002	40.281	1867.76			15826
684	11.993	33.452	1865.02			5948.6
685	12.231	31.466	1865.04			4882.4
686	12.089	26.042	1865.1			3616.9
687	12.039	42.247	1864.92			30555
689	12.071	29.522	1865.12			4867.7
690	12.088	36.743	1867.89			9426.8
693	12.087	36.743	1864.97			10434
694	12.402	84.332	1456.63			57633
695	12.415	80.046	1456.61			51596
696	12.401	79.541	1456.65			38432
697	12.398	67.085	1456.67			24012
698	12.459	33.658	1457.59			7221.9
699	12.392	56.054	1457.69			10759
700	12.347	35.12	1918.68			6011.4
704	12.061	40.281	1864.94			19994
706	12.32	42.247	1918.71			11784
709	12.426	12.703	2272.07			3828
713	12.447	41.298	2271.9			20703
716	12.437	16.294	3088.37			6535.9
717	12.471	21.151	1456.71			4922.7
718	12.483	18.97	1478.6			5768.2
719	12.427	12.99	3158.41			10573
720	12.483	22.876	1253.55			5755.2
721	12.472	24.419	2272.04			7941
722	12.451	29.843	1253.54			6099.2
725	12.463	33.252	1456.69			10428
730	12.744	45.384	478.194			8449.5
731	12.683	38.19	478.201			4861.2
732	12.808	28.902	2396.96			5639.4
733	12.709	32.684	2139.87			7600.6
734	12.797	40.976	3124.24			72852
736	12.78	27.029	781.302			5436.9
740	12.69	38.262	781.359			20667
741	12.773	39.765	3125.59			84735
742	12.795	40.976	3125.63			119290
744	12.798	29.011	2396.93			8746.6
745	12.755	29.106	2139.9			8528.3
746	12.667	31.088	2364.93			9837.4
748	12.764	33.009	2396.9			11594
749	12.644	48.098	681.247			12197
750	12.65	58.562	681.254			20194
751	12.661	56.132	681.263			16226
752	12.777	29.106	2139.93			5997.9
753	12.773	33.009	3124.55			22243
754	12.944	13.981	2074.93			4296.8
755	12.732	31.088	2364.96			11091
759	13.077	24.595	2718.11			9781.8
763	13.187	23.057	2144.9			7676.4
764	13.142	37.004	2145.04			16164
765	13.13	17.664	2145.1			4242.1
768	13.287	15.135	2841.15			7295.1
769	13.181	30.94	2145.07			8540.3
770	13.161	44.81	2144.95			56434
771	13.143	40.886	2144.98			42526
772	13.153	40.886	2144.93			37828
773	13.281	31.122	1364.57			8249.9
774	13.257	31.122	1364.59			7277.4
775	13.29	29.884	3485.68			9245.2
776	13.281	18.907	2841.11			7623.2
778	13.253	22.144	3484.4			7570.6
779	13.143	40.886	2145.01			26892
780	13.319	35.23	1394.62			13125
781	13.311	29.465	1394.64			7905.2
782	13.257	35.23	1394.58			14849
783	13.34	35.23	1394.6			17399
788	13.496	17.566	1901.95			4403.1
790	13.472	36.982	1901.9			16626
791	13.492	29.549	1901.92			9368.6
800	13.796	23.162	1633.66			8890.6
801	13.66	32.277	1633.68			9633.1
802	13.656	32.277	1633.7			7616.3
807	13.791	28.181	2380.07			6727.9
808	13.787	34.442	2379.98			11209
809	13.812	36.472	2380.01			14606
810	13.796	34.442	2380.04			11664
811	13.954	10.685	3068.43			5495.5
814	13.99	26.767	3068.39			7500.7
817	14.059	43.121	1570.65			37571
818	14.058	43.121	1570.67			35180
819	14.109	39.5	1570.69			23878
820	14.091	37.832	1570.62			13763
821	14.093	37.832	3139.4			16766
822	14.109	34.702	1570.72			8820
823	14.062	31.282	1827.66			7067.8
824	14.077	19.963	1773.88			4399.7
826	14.017	23.018	3067.31			9941.8
827	14.003	35.121	3068.35			9145.2
832	14.081	39.5	1773.8			22737
833	14.082	34.377	1773.83			13476
835	14.092	31.274	1774.69			6334.7
836	14.091	31.274	1773.85			6716.8
842	14.228	20.589	2280.97			8052.9
843	14.041	32.852	1827.64			7660.8
844	14.253	19.484	700.222			2755.8
845	14.266	32.75	700.23			10217
846	14.227	38.338	700.239			14481
847	14.24	32.75	700.248			9464.9
848	14.159	25.297	2280.91			7691.3
849	14.223	27.4	2280.94			9309.3
850	14.366	16.122	2288			7188.9
851	14.346	38.055	2251.9			7289.8
852	14.367	26.032	2287.97			8789.1
853	14.427	23.902	2251.92			7095.6
861	14.606	23.165	1844.99			4717.1
862	14.655	32.551	1844.94			7037.9
864	14.494	31.085	1438.63			6202
865	14.655	24.77	1641.71			6489.8
866	14.652	39.928	1844.89			19779
867	14.61	28.222	1898.76			4714.9
868	14.601	34.437	1844.71			10996
869	14.658	28.355	1844.97			5110.7
870	14.656	39.928	1898.69			14399
871	14.59	37.946	1898.73			8195.1
872	14.602	39.928	1899.68			10389
873	14.497	43.937	983.49			6445
876	14.653	41.798	1438.6			6942.6
877	14.506	41.798	1438.62			8618.1
878	14.62	37.946	1844.92			13876
881	1.646	10.707	861.667			9243.3
882	1.646	21.413	861.677			17586
883	1.675	10.707	1101.58			9313.2
884	1.646	10.707	981.625			7178.4
885	1.651	17.131	981.636			13704
886	1.662	6.425	1052.59			3132.4
887	1.646	10.707	1052.6			5668.4
888	4.347	13.871	1742.62			3604.8
892	4.324	106.289	870.347			358670
894	4.383	83.972	870.411			220460
895	4.387	65.025	870.421			141130
896	4.384	63.219	870.431			117740
897	4.345	39.34	6097.72			17344
898	4.398	39.34	6097.8			17136
899	4.431	63.219	870.337			41268
900	4.403	48.999	870.327			8888.6
901	4.384	61.483	870.442			78945
902	4.384	59.51	870.452			64584
903	4.378	56.007	870.462			51642
904	4.374	52.142	870.473			39799
905	4.328	52.142	870.484			40827
906	4.358	56.165	870.493			46350
907	4.365	52.142	870.503			38742
908	4.37	48.999	870.514			26442
909	4.444	33.851	6090.93			14840
910	4.282	37.546	870.317			3798.7
911	4.448	27.542	870.557			4185
912	4.461	39.34	870.575			8260.4
913	4.383	33.851	870.585			6324.5
914	4.389	33.851	870.596			5627.2
915	4.407	31.762	870.606			5056.1
916	4.453	27.542	870.617			3844.1
917	4.397	27.542	870.627			4419.6
918	4.399	25.737	870.638			3588.4
919	4.363	23.784	870.648			3367
920	4.399	16.958	870.659			3405.8
921	4.323	109.121	871.362			381510
922	4.315	41.335	3480.42			24038
923	4.368	48.999	1740.73			37635
924	4.333	48.999	1740.74			32614
925	4.399	43.477	3481.52			15748
926	4.351	43.477	3481.45			28493
927	4.409	41.335	1740.77			13748
928	4.39	25.737	3480.39			6907.1
929	4.42	37.546	3483.52			13173
930	4.392	33.851	1740.79			7100.4
931	4.405	35.74	1742.72			8311.7
932	4.467	43.477	856.395			4624.8
933	4.276	61.483	878.345			13035
934	4.417	61.483	878.355			15574
935	4.488	61.483	878.365			11288
936	4.487	54.262	878.376			6871
937	4.279	41.335	878.335			5141
941	4.384	83.972	892.376			79733
942	4.384	72.885	892.386			47192
943	4.384	61.483	892.397			25957
944	4.477	69.63	892.325			19537
945	4.384	56.165	892.408			12904
950	4.275	63.219	900.33			5210.3
951	4.421	67.349	900.34			6289.5
952	4.462	57.911	924.279			4298.9
953	5.177	15.908	871.354			4035.6
965	6.442	87.197	998.5			44298
966	6.455	81.136	998.511			24662
967	6.455	74.953	998.522			14604
968	6.428	68.904	998.533			8190.7
974	6.483	60.686	1006.44			5977
975	6.465	76.951	1006.45			6549.8
984	8.075	35.449	998.402			18440
987	8.036	30.316	1038.51			11209
988	8.062	24.931	1038.5			5441.9
989	8.087	30.316	1038.52			10849
990	8.065	26.395	1038.53			7062.4
991	8.064	19.587	1038.54			4455.4
992	8.061	15.772	2130.94			5732.1
993	8.075	11.894	2130.96			5573.7
994	8.099	24.931	2217.94			29037
995	8.107	28.852	2217.97			54840
996	8.096	21.473	2218.02			26273
997	8.088	21.473	2218.04			14914
998	8.106	26.838	2217.99			42847
999	8.075	13.865	2218.07			7314.7
1000	8.064	17.552	998.338			9506.9
1001	8.11	10.064	3193.32			8092.4
1002	8.105	12.034	3194.35			10566
1003	8.108	12.034	3194.37			8702.6
1004	8.127	8.174	3194.4			5756.3
1005	8.11	33.745	1241.59			40978
1007	8.11	33.745	1241.6			33195
1008	8.11	33.745	1241.62			20990
1009	8.11	28.302	1241.63			11712
1010	8.11	33.745	1241.58			31361
1019	8.199	9.719	3124.44			5586.3
1020	8.152	13.873	3159.39			9544.4
1022	8.193	17.416	3124.41			8999.9
1024	8.467	57.384	941.375			141060
1025	8.466	48.388	941.364			19734
1026	8.477	44.524	941.353			7502.5
1027	8.426	51.72	941.492			119060
1028	8.426	50.039	941.502			97874
1029	8.426	50.039	941.513			76852
1030	8.456	50.039	941.524			79733
1031	8.435	50.039	941.534			89760
1032	8.418	50.039	941.545			75663
1033	8.438	46.333	941.556			51845
1034	8.456	46.333	941.57			51663
1035	8.441	46.333	941.58			54274
1036	8.472	36.468	941.693			7125
1037	8.422	38.416	1886.09			9739.7
1038	8.467	59.393	943.398			152860
1039	8.461	65.404	943.408			218560
1040	8.478	63.514	943.418			173710
1041	8.399	34.42	4712			10716
1042	8.417	34.42	4712.06			9981.3
1043	8.404	34.42	4712.11			10290
1044	8.399	34.42	4712.16			10606
1045	8.443	34.42	4712.27			8753.3
1046	8.455	32.552	4712.32			8232.4
1047	8.356	36.468	4712.43			8471.5
1048	8.457	44.524	4714.39			23969
1049	8.428	50.039	4715.29			49693
1050	8.455	44.524	943.379			9888.2
1051	8.446	51.72	943.389			59046
1052	8.399	28.78	4712.96			9737.4
1053	8.477	44.524	4715.45			39695
1054	8.516	32.552	4715.99			7320.5
1055	8.342	30.75	4716.04			8655
1056	8.357	34.42	1885.68			5639.1
1057	8.453	32.552	1886.7			5468.8
1058	8.421	42.568	1887.92			10390
1059	8.47	36.468	942.703			5016
1060	8.451	36.468	942.714			5345.8
1061	8.417	34.6	943.366			4340.1
1062	8.452	42.568	943.501			9098.4
1063	8.44	40.469	943.512			7325
1064	8.421	48.388	944.438			21810
1065	8.421	46.333	944.448			12986
1066	8.387	32.797	3799.62			10048
1067	8.307	34.6	3800.55			8530.3
1068	8.302	44.623	1917.78			19849
1069	8.387	18.541	1312.65			4912.1
1070	8.345	34.897	1917.81			10808
1071	8.385	24.776	1312.62			5838.7
1072	8.386	24.776	1312.63			6858.3
1073	8.337	34.6	3799.59			12091
1074	8.348	30.829	3802.58			8272.5
1075	8.362	42.57	1917.76			7782.7
1080	8.559	38.408	1639.68			9686.5
1081	8.589	38.408	1639.7			9423.7
1082	8.588	38.408	1639.67			8626.1
1083	8.61	34.417	1639.71			6557.4
1084	8.521	32.465	1761.76			5852.8
1087	8.427	46.333	3765.63			41198
1088	8.447	46.333	3764.61			46940
1089	8.608	27.019	1761.73			5375.2
1090	8.618	36.451	1761.74			6014.9
1091	8.509	46.333	3765.55			14208
1092	8.767	5.87	897.402			2363
1093	8.803	25.137	994.309			3484.4
1098	8.908	20.669	959.343			3267.5
1099	8.784	36.464	959.353			9063.3
1100	8.808	40.471	959.363			8198.7
1101	8.957	36.464	959.374			5502
1108	9.156	21.742	1348.51			4542.2
1125	9.711	24.288	1719.75			6461.7
1126	9.707	22.336	1719.79			5477.8
1127	9.698	24.288	1719.77			7428.4
1132	10.058	26.639	1181.51			5177.5
1133	10.066	28.759	1181.53			6252.6
1134	10.389	11.43	1441.57			4159.8
1146	10.516	33.694	1419.56			15662
1151	10.687	22.214	1454.53			5030.5
1163	10.659	39.485	1159.42			16099
1170	10.782	16.032	1647.8			4185.3
1171	10.667	29.449	1159.41			5427.9
1174	10.776	15.924	3548.49			9606.7
1175	10.819	11.851	1687.82			3745
1181	10.742	26.139	1850.89			11629
1185	10.687	27.675	976.361			5019.4
1188	10.656	42.881	1159.43			22374
1190	10.782	23.161	1850.91			5786.1
1191	10.819	12.223	3548.56			5260.6
1192	10.864	6.853	3619.55			5945.6
1194	10.847	20.439	1890.88			10130
1196	10.867	15.485	1687.8			5552.3
1198	10.783	15.924	3548.53			8166.5
1205	10.864	20.439	1890.9			7746.4
1208	10.909	16.881	2094.03			5738.2
1209	10.906	24.165	2094.01			9721.3
1210	10.884	27.808	2093.92			24686
1211	10.864	27.808	2093.95			34874
1212	10.891	27.808	2093.97			26048
1213	10.868	25.923	2093.99			17445
1214	10.888	23.901	2093.9			7922.3
1219	10.974	13.452	1744.66			3848.3
1220	11	22.601	1744.76			5849.9
1227	11.066	13.874	1722.78			4646.3
1228	10.977	20.959	1776.62			5067.5
1232	11.031	15.337	1722.88			3591.7
1234	11.035	35.311	1722.78			49249
1238	10.996	33.481	1722.8			27756
1239	11.029	31.757	859.406			17117
1244	11.042	35.311	1722.68			24117
1245	11.134	22.147	1718.84			9199.9
1246	10.997	28.817	1722.82			17399
1247	11.089	33.481	1724.69			15899
1248	11.127	32.208	1758.83			10190
1249	11.092	20.564	1758.85			7378.2
1250	11.027	32.496	955.452			6329.3
1251	11.026	30.706	955.463			5416.1
1254	10.978	24.368	1198.43			4548.6
1255	11.057	22.727	1316.55			4192.9
1256	11.088	24.368	1316.56			6052.9
1257	11.11	40.103	2165.04			31425
1262	11.032	19.229	1722.86			5379
1263	11.035	25.866	1776.66			6256.9
1264	11.014	25.866	1776.64			7680.5
1266	11.092	11.123	2172.96			4250.3
1267	11.148	14.527	1922.01			3852.9
1270	11.106	34.955	1961.92			17066
1271	11.082	35.068	2165.07			17386
1272	11.085	41.893	2164.95			50165
1273	11.189	15.993	2172.98			4636.8
1274	11.091	17.564	1718.86			4519.7
1281	11.132	31.721	1921.92			45370
1282	11.132	28.215	1921.94			23562
1284	11.082	24.894	1921.97			11501
1289	11.087	19.168	1961.96			5971.8
1290	11.075	16.169	2165.11			5337.8
1291	11.093	43.693	2165			79683
1292	11.092	41.893	2165.02			51222
1293	10.956	35.311	1176.45			5386.3
1296	11.089	19.168	1758.87			4389.6
1297	11.192	12.405	1829.89			4515.9
1298	11.133	20.564	1921.99			7238.5
1299	11.105	20.564	2165.09			9086.6
1300	11.183	13.597	2236.12			4189.2
1302	11.106	34.955	1961.94			10560
1308	11.202	19.999	2032.93			9539.3
1309	11.211	18.358	2032.95			8878.6
1310	11.199	17.059	2032.97			5773.3
1311	11.212	29.192	2236.01			36998
1312	11.205	29.192	2236.04			33129
1313	11.204	29.192	2236.06			21933
1314	11.198	25.306	2236.08			12905
1315	11.222	29.192	2235.99			17984
1316	11.2	21.829	2236.1			8275.4
1317	11.193	18.295	1829.86			5862.1
1318	11.145	26.536	2164.93			10761
1321	11.088	43.693	2164.98			88480
1326	11.37	7.895	1775.73			3654.4
1329	11.317	14.266	2078.02			4829.3
1332	11.371	32.021	2229.93			12394
1333	11.424	28.291	2229.95			11687
1335	11.565	40.981	1847.66			19347
1336	11.598	39.251	1847.68			18045
1337	11.584	39.251	1847.7			12066
1338	11.517	36.049	1848.72			6479.3
1339	11.533	23.017	1849.65			5286.6
1343	11.385	22.137	2229.97			7281.3
1345	11.484	7.871	2737.1			6684.2
1352	11.531	40.612	1793.81			37427
1353	11.546	37.691	12552.7			71244
1354	11.56	37.691	12552.8			76049
1355	11.558	36.049	12552.9			63550
1356	11.567	34.106	12553			43765
1357	11.538	34.106	12559			23168
1358	11.512	36.049	12559.8			49318
1359	11.529	34.106	12559.9			41092
1360	11.53	37.61	7172.29			33290
1361	11.539	34.106	7172.34			26189
1362	11.536	37.691	1793.71			10797
1363	11.533	29.494	1793.85			9463.5
1364	11.539	15.788	1793.87			4940
1365	11.551	29.494	7173.23			22266
1366	11.538	29.494	7177.21			14773
1367	11.527	29.494	7176.27			20985
1368	11.551	34.106	5381.5			23891
1369	11.551	25.128	5381.59			10225
1370	11.535	6.07	3586.76			4276.5
1371	11.532	7.871	3588.78			4866.4
1376	11.424	52.331	1793.82			245380
1377	11.523	48.359	1793.84			181660
1378	11.537	46.266	1793.87			118840
1379	11.537	44.178	1793.89			78259
1380	11.537	39.251	1793.91			49529
1381	11.537	39.251	1793.93			39502
1382	11.537	37.691	1793.95			31233
1383	11.524	36.049	1793.97			21856
1384	11.525	36.049	1793.99			20975
1385	11.551	37.691	1794.01			27229
1386	11.532	44.536	1793.7			19383
1387	11.551	52.331	1793.72			190650
1388	11.518	36.049	1794.03			24142
1389	11.533	34.106	1794.05			14577
1390	11.551	34.106	1794.07			11502
1391	11.536	34.106	1794.09			15644
1392	11.531	32.413	1794.11			11937
1394	11.55	52.301	1796.77			94220
1396	11.548	48.359	1796.79			67303
1397	11.535	46.266	1796.73			37310
1398	11.544	48.359	1796.75			93066
1399	11.557	46.266	1796.81			46111
1400	11.555	44.178	1796.83			28273
1402	11.551	37.691	2694.06			15678
1403	11.518	20.018	2693.5			4859.1
1404	11.561	39.251	1796.85			18896
1405	11.536	36.049	1796.87			11433
1406	11.551	34.106	1796.89			7612.9
1407	11.468	32.608	2736.13			11093
1412	11.546	34.106	1823.73			7589.4
1424	11.379	32.021	2229.9			9890.7
1425	11.596	46.266	1387.6			19136
1426	11.589	39.251	1387.62			13834
1427	11.586	46.266	1387.59			16727
1428	11.596	34.552	1387.58			6975.4
1429	11.551	37.691	1387.63			8894.2
1430	11.655	32.608	1387.64			5397.3
1432	11.54	21	2108.02			5108.7
1438	11.439	34.106	1815.69			5782.1
1445	11.533	32.608	1591.65			5423.6
1446	11.508	26.503	1775.75			5148.2
1448	11.438	29.494	1815.86			3729.4
1450	11.715	4.497	1321.57			3121.3
1451	11.535	37.691	1801.71			9471
1457	11.677	37.599	827.356			7331.8
1458	11.675	33.418	827.366			6664.3
1463	11.675	35.506	850.37			11512
1464	11.705	31.588	850.379			5516.5
1465	11.423	35.748	1815.83			6542.2
1466	11.487	37.691	1815.81			12589
1468	11.657	36.049	1847.73			7123.4
1469	11.758	15.953	2714.18			4567.2
1470	11.813	7.922	1811.7			5287.8
1479	11.803	29.853	2300.94			18814
1480	11.797	29.853	2300.96			27087
1481	11.798	27.783	2300.98			20681
1482	11.798	23.923	2301			12333
1483	11.793	15.8	2301.03			7193.8
1484	11.88	15.8	2300.92			7432.7
1487	11.873	9.482	2400.99			5213.9
1494	12.122	40.281	1886.73			6676.2
1497	11.883	12.575	3658.55			19476
1498	11.886	12.575	3658.58			14849
1499	11.882	12.575	3658.52			19690
1500	11.879	10.482	3658.61			9616.3
1501	11.88	8.789	3658.49			8526
1502	11.883	6.7	3658.64			5617.7
1504	11.881	10.881	1841.76			6409.3
1505	11.892	8.789	1841.78			10521
1506	11.892	10.881	1841.79			9653.4
1507	11.892	8.789	1841.81			7195
1508	12.081	31.466	11183.4			22654
1509	12.106	35.12	11183.2			54904
1510	12.114	35.12	11185			69740
1511	12.108	33.452	11185.1			44108
1512	12.104	33.452	11189.4			45588
1513	12.08	35.12	11189.2			90523
1514	12.083	33.452	11189.3			65617
1515	12.1	36.743	7457.21			108670
1516	12.09	35.12	7456.44			53053
1517	12.105	36.743	7459.43			120920
1518	12.011	33.452	9319.42			40985
1519	12.086	27.602	7457.58			11814
1520	12.181	33.452	5594.75			27609
1521	12.1	36.813	1864.75			50403
1525	12.101	35.12	1865.13			63668
1526	12.102	35.12	1865.14			52586
1527	12.058	29.522	11195.4			14456
1528	12.092	42.247	5597.4			143450
1529	12.091	40.281	5597.49			77521
1530	12.07	35.12	5597.58			34964
1533	12.098	33.452	11196.9			26367
1534	12.117	33.452	7465.23			22612
1535	12.057	36.743	1867.8			37142
1536	12.056	22.708	13069.9			9462.8
1537	12.061	33.452	11192.1			52228
1538	12.092	29.522	11192.3			31005
1539	12.08	29.522	11192.4			22530
1540	12.095	29.522	7464.45			19740
1541	12.098	29.522	5598.38			22249
1543	12.09	35.12	1867.83			23246
1544	12.091	31.466	1867.86			8551.7
1548	12.016	74.849	1661.77			94542
1550	12.032	47.139	1661.79			54541
1551	12.012	40.281	1661.81			29945
1552	11.953	40.281	1661.67			16495
1553	12.019	40.281	1661.83			21946
1554	11.971	71.37	1663.7			71218
1555	12.084	35.12	4662.27			29450
1556	11.972	72.679	4662.37			180080
1557	12.075	36.743	4662.32			28155
1558	12.085	40.281	3729.88			100110
1559	12.102	40.281	1864.96			107070
1560	12.102	38.436	1864.98			88838
1561	12.07	36.743	1865.01			66921
1562	12.103	36.743	1865.03			62092
1563	12.056	42.247	4665.23			90989
1564	12.063	42.247	4665.28			66920
1565	12.054	38.436	4665.33			56865
1566	12.079	36.743	4665.39			40970
1567	12.032	31.466	5595.77			15876
1568	12.078	31.466	5595.83			15096
1569	12.012	33.452	5598.37			23982
1570	12.01	33.452	5598.44			29714
1571	12.066	33.452	5598.5			19357
1573	12.093	38.436	5600.72			43151
1574	12.114	36.743	5600.79			32005
1575	12.001	40.281	4669.94			47047
1576	12.1	35.12	5600.85			28596
1577	12.032	33.452	4667.98			17759
1578	12.022	31.466	4668.08			12841
1579	12.091	42.247	1867.76			61191
1580	12.145	33.452	1867.97			13664
1581	12.078	31.466	1868.01			10068
1582	12.144	31.466	1868.05			10020
1583	12.086	33.452	1868.08			10473
1584	12.022	31.466	1868.1			7570.7
1585	12.024	29.522	1868.12			7001.1
1589	12.026	35.12	1871.83			10569
1590	12.069	24.268	5606.82			8113.1
1591	12.058	24.268	4671.1			7535.2
1592	12.065	29.522	4671.16			7816.3
1593	12.096	29.522	4671.21			9185.6
1596	12.042	24.371	5607.76			8191.7
1597	12.078	29.522	4671.37			9169.4
1598	12.086	36.743	4671.42			20042
1599	12.071	12.064	4672.05			5560.6
1600	12.078	35.12	1869.85			12419
1601	11.968	33.452	1869.88			7786.8
1604	12.234	45.862	1918.69			18539
1608	12.102	33.452	5600.54			22094
1609	12.111	27.602	1864.95			9716.8
1610	12.123	27.602	1864.96			8984
1611	12.121	27.602	1864.98			9005.4
1612	12.153	24.371	1661.91			3897.6
1613	12.021	25.931	1661.97			3638.9
1614	12.341	57.677	1456.61			19729
1615	12.151	71.258	1458.64			25790
1616	12.239	71.258	1457.62			38038
1617	12.133	69.183	1458.65			21435
1618	12.155	61.239	1458.66			12855
1619	12.174	36.743	1458.68			7072.5
1620	12.275	6.743	1880.8			3747.4
1621	12.073	27.602	1661.79			5654.3
1623	12.13	29.522	1864.93			12683
1627	12.079	33.452	1661.77			11064
1629	12.123	33.452	1661.87			7088.2
1630	12.031	29.522	1661.89			5699.2
1631	12.047	35.12	1661.84			11140
1636	12.314	13.94	1456.59			4551.2
1637	12.189	31.466	1661.67			6952.4
1647	12.317	18.018	3088.33			5844.6
1655	12.39	16.324	3088.43			5857.8
1656	12.361	45.461	2271.91			44916
1660	12.352	32.629	2271.88			9757
1663	12.351	21.366	3088.36			9593.9
1664	12.436	5.136	2068.81			4363.2
1666	12.397	16.294	3159.37			5742.2
1667	12.346	16.294	3159.44			7428.3
1668	12.397	21.655	2272.04			6656.8
1669	12.439	11.008	2293.9			5354.7
1671	12.491	29.732	1882.73			13000
1684	12.416	21.366	3088.4			8988.2
1685	12.483	11.07	2293.92			5859.2
1686	12.496	33.252	1253.54			6336.7
1687	12.472	27.904	1253.55			6506.3
1688	12.483	22.814	1253.56			4423.9
1689	12.451	10.717	1253.53			3249.4
1692	12.584	43.352	898.388			12847
1694	12.454	39.179	1795.75			7046
1695	12.571	45.43	898.397			17182
1696	12.626	39.615	898.408			12825
1697	12.549	37.517	898.418			7088
1698	12.448	31.977	2068.83			12327
1702	12.504	21.151	1035.41			3940.4
1703	12.466	17.676	1679.66			5301.7
1704	12.517	15.756	1679.68			5764.2
1707	12.359	19.368	3159.4			7180.1
1711	12.523	41.768	978.331			5536.4
1714	12.543	44.901	882.362			9623.2
1715	12.497	36.024	920.367			6349.9
1716	12.53	40.019	920.377			10451
1717	12.555	40.019	920.387			8544
1718	12.555	27.901	920.398			5852.7
1729	12.774	36.296	2343.07			44272
1730	12.744	33.009	2343.09			26202
1731	12.748	27.029	2343.12			15255
1732	12.742	36.296	2342.92			39859
1733	12.767	23.321	2343.14			8954.4
1734	12.792	21.223	2343.17			7010.6
1735	12.768	40.976	2343.94			76875
1736	12.723	27.029	2350.97			8085.1
1737	12.765	27.029	2350.94			8807.3
1738	12.816	24.954	8199.64			13304
1739	12.757	22.856	2350.99			6137.7
1740	12.707	12.097	2350.01			4367.2
1742	12.345	33.368	1456.66			7424
1743	12.346	36.796	1456.64			13833
1744	12.773	6.936	1561.96			3554.7
1745	12.754	16.03	1687.04			5961.9
1754	12.791	23.321	1561.98			8598.1
1755	12.789	21.223	1561.99			7021.6
1756	12.744	23.321	1562.63			6290.9
1757	12.753	27.473	1562.64			7671.4
1761	12.748	35.817	2139.98			8896.5
1762	12.769	36.296	2364.95			29466
1763	12.764	34.666	2364.92			19516
1767	12.786	25.396	2364.9			7876.3
1768	12.866	9.337	1221.53			2731.3
1770	12.752	25.396	2140.01			4597.5
1771	12.74	39.01	2139.88			51322
1772	12.755	43.157	2139.9			58248
1773	12.757	40.096	2139.92			40693
1774	12.734	42.526	2139.94			26222
1775	12.722	39.01	2139.85			15316
1776	12.753	45.779	2139.96			17157
1777	12.806	34.666	2140.86			19295
1781	12.735	27.029	2396.92			6148.4
1782	12.677	29.011	2396.89			9122.9
1783	12.699	29.011	1198.44			5587.9
1784	13.035	9.829	2717.4			4632.9
1786	13.035	15.259	2514.19			4847.5
1787	13.033	29.818	2514.16			6802.6
1788	13.035	12.962	2717.37			5851.3
1794	13.061	25.351	2770.09			7755.1
1795	13.058	33.976	2772.08			9558.5
1799	12.986	12.962	923.68			3842.6
1800	13.027	38.762	2310.98			9775.1
1801	13	37.048	2311			11502
1802	13.001	23.478	2311.02			7566.8
1803	12.988	15.101	2311.05			4864.8
1804	13.016	15.259	2513.01			5724.9
1808	13.012	15.101	2725.13			6424.9
1813	13.025	49.118	2717.09			37156
1814	13.046	25.094	2717.34			10319
1819	13.103	16.312	2738.08			5262.4
1825	13.115	40.291	2514.02			11705
1827	13.013	26.55	2514.17			8115.5
1828	13.024	47.477	2717.27			30301
1831	13.17	3.392	5594.43			6434.7
1832	13.34	57.002	2144.93			16383
1833	13.228	53.553	2144.95			22113
1834	13.208	42.736	2144.97			22506
1835	13.21	30.94	2145.01			7096.5
1836	13.225	37.004	2144.99			16278
1839	13.242	21.136	2146.04			4733.5
1844	13.04	42.031	2717.31			17547
1850	13.005	45.662	2717.24			18290
1851	13.021	40.291	2717.27			10060
1852	13.12	47.477	2718.1			18018
1858	13.156	33.043	1941.9			7202.2
1859	13.21	48.075	1773.79			6011.8
1860	13.196	17.82	2794.21			5484.8
1861	13.032	52.89	2717.24			55476
1862	13.187	9.436	1897.74			5245.7
1863	13.345	33.426	2841.11			12959
1867	13.284	31.513	947.356			4669
1876	13.238	38.738	2788.29			75397
1877	13.262	35.23	2788.33			40666
1878	13.307	31.513	2788.36			26027
1879	13.268	29.465	2788.39			14918
1880	13.252	23.647	2788.42			9409
1881	13.317	33.426	2788.11			22638
1882	13.319	22.144	2788.45			7077.2
1883	13.265	18.196	2788.56			5150.8
1884	13.276	25.732	2790.12			8857.5
1885	13.167	20.117	2796.14			5299.5
1891	13.241	27.362	940.381			4050.8
1892	13.185	27.362	940.391			3881.2
1901	13.206	26.934	2215.98			9283.3
1902	13.235	29.02	2216			9714.6
1903	13.214	27.362	2216.03			7730.7
1904	13.302	18.196	2788.38			5450.1
1905	13.227	21.62	2796.14			7051.9
1907	13.2	21.329	2821.15			9441.3
1908	13.205	17.664	2821.17			7128.5
1910	13.323	15.135	1859.11			6534.2
1919	13.29	31.513	2585.21			12159
1920	13.255	25.732	2585.23			7478.5
1927	13.291	31.513	2788.29			31376
1928	13.282	29.465	2788.32			18150
1929	13.315	23.647	2788.35			9907.7
1930	13.305	31.513	2788.12			18530
1931	13.317	31.513	936.716			6813
1933	13.326	26.332	1040.45			3984.3
1936	13.216	18.196	2382.1			4797.3
1937	13.335	59.735	2382.01			13871
1938	13.302	59.735	2382.03			15905
1939	13.32	41.047	2382.05			13172
1940	13.326	31.796	2382.08			8506.2
1943	13.368	31.796	3194.31			8890.7
1945	13.326	20.117	1859.12			5856.2
1951	13.488	38.552	1901.9			16593
1952	13.222	23.647	2795.21			7877.6
1953	13.202	29.465	2796.16			12479
1954	13.206	27.362	2796.19			11350
1955	13.324	20.933	1859.13			7123.4
1956	13.268	27.835	2585.22			8020
1959	13.298	29.465	2841.11			9100.7
1961	13.487	27.583	1901.92			8317.5
[truncated: 919 more rows]
